# Supplementary material for: Single-Cell Transcriptomic Profiles of Lung Pre-Metastatic Niche Reveal Neutrophil and Lymphatic Endothelial Cell Roles in Breast Cancer
Source: MDPI journal article supplement (doi:10.3390/cancers15010176), 2022-12-28
Supplement: s1 [file s1]

## **Supplementary data**

**Figure S1. Quality control of scRNA-seq.** (a) knee plot of single cell RNA-seq profile (b) Batch-effect correction. (c) Scatterplot illustrating the number of genes, unique molecular identifiers (UMIs) and the percentage of mitochondrial genes in each cell of three lung samples.

**Figure S2. The cell clusters of monocyte/macrophage and dendritic cells.** (a) The blueprint of myeloid cells. (b) The trajectory analysis of myeloid cells. The phenotypic changes of myeloid cells, as determined by the Monocle 2 algorithm.

**Figure S3. WGCNA analysis of different subsets of monocytes.** (a) The correlation between modules and different types of monocytes. The top 25 hub genes in (b) M1, (c) M2 and (d) M4 modules.

**Figure S4. Connective network of WGCNA modules (M1 and M6 modules) for monocytes.**

**Figure S5. KEGG pathways of (a) M1 and (b) M4 modules.**

**Figure S6. Trajectory analysis of monocytes.** (a) Genes that involved in the phenotypic change. (b) The genes contributed to non-classical and classical monocytes.

**Figure S7. Trajectory analysis of granulocytes.** (a) Trajectory analysis of granulocytes and neutrophils. (b) The genes contributed the phenotypic change of N1- and N2-type neutrophils.

**Figure S8. WGCNA analysis of N1- and N2-type neutrophils.** (a) WGCNA analysis (b) The correlation of modules in N1- and N2-type neutrophils. The top 25 hub genes in eigengene network of (c) M4, (d) M 5, (e) M 7, (f) M 8, (g) and M 10 modules.

**Figure S9. Connective network of modules for N1- and N2-type neutrophil WGCNA (M 1 to M10 modules) analysis.**

**Figure S10. The KEGG pathways of (a) M 4, (b) M 8, (c) M 5 and (d) M 10 modules.**

**Figure S11. Trajectory analysis of ECs.** (a) Trajectory analysis for endothelial cells. (b) The Venn diagram of genes of all EC clusters. (c) Expression of NRAS and PIK3CA in lymphatic ECs.

**Figure S12. WGCNA analysis of lymphatic ECs.** (a) WGCNA cluster dendrogram and module assignment. The colors in the horizontal bar represented the modules. The eigengene network of (b) M 1 and (c) M 2 modules.

**Figure S13. The networks of modules in lymphatic endothelial cells.**

**Figure S14. WGCNA analysis of stroma cells.** The eigengene networks of (a) M 1, (b) M 2, (c) M 3, (d) M 4, and (e) M 5 modules.

**Figure S15. The network of WCGNA modules of stroma cells.**

**Figure S16. Downregulated cell-cell interactions of the cell types of the lungs.** (a) Interactions between lymphatic ECs and granulocytes. (b) The cross talk between capillary type I ECs with lymphatic ECs. (c) The total network of downregulated cell-

cell communication in the lung PMN.

**Figure S17. The secretions of Anax1 (a) and galectin-3 (LGALS3) (b) was found in the N2-type neutrophils (CD45<sup>+</sup>Ly6g<sup>+</sup>S100A8/A9<sup>+</sup>) of the lung PMN.**

**Figure S18. The interactions of ECs with neutrophils.** (a) S100A6 involved in the interaction lymphatic ECs with N2-type neutrophils. (b) The cell-cell communication of ECs with neutrophils by S100A6.

**Figure S19. The enhanced levels of S100A6 in several cell types of lungs in MMTV-PyVT mice.**
