# Supplementary material for: Single-Cell Transcriptomic Profiles of Lung Pre-Metastatic Niche Reveal Neutrophil and Lymphatic Endothelial Cell Roles in Breast Cancer
Source: MDPI journal article supplement (doi:10.3390/cancers15010176), 2022-12-28
Supplement: s1 [file s1]

**Table S28. The primers used in this study**

| Gene     | Primer sequence                       | Note                              |
|----------|---------------------------------------|-----------------------------------|
| Ccl3     | Forward: 5'-ccaagtctctcagcgccat-3'    |                                   |
|          | Reverse: 5'-TTGGAGTCAGCGCAGATCTG-3'   |                                   |
| Arg1     | Forward: 5'-caacactcccctgacaacca-3'   |                                   |
|          | Reverse: 5'-CTCGCAAGCCAATGTACACG-3'   |                                   |
| Mmp9     | Forward: 5'-agctggcagaggcactactg-3'   |                                   |
|          | Reverse: 5'-GGCCTTTAGTGTCTGGCTGT-3'   |                                   |
| Icam1    | Forward: 5'-ccactgccttgtagaggtg-3'    |                                   |
|          | Reverse: 5'-TACTTGGCTCCCTCCGAGA-3'    |                                   |
| Actb     | Forward: 5'-taccaggcattgctgacag-3'    |                                   |
|          | Reverse: 5'-ACTCCTGCTTGCTGATCCAC-3'   |                                   |
| oIMR8744 | Forward: 5'-CAAATGTTGCTTGCTGCTGGTG-3' | Internal Positive Control Forward |
| oIMR8745 | Reverse: 5'-GTCAGTCGAGTGCACAGTTT-3'   | Internal Positive Control Reverse |
| oIMR0384 | Forward: 5'-GGAAGCAAGTACTTCACAAGGG-3' | Transgene Forward                 |
| oIMR0385 | Reverse: 5'-GGAAAGTCACTAGGAGCAGGG-3'  | Transgene Reverse                 |
