# Supplementary material for: Single-Cell Transcriptomic Profiles of Lung Pre-Metastatic Niche Reveal Neutrophil and Lymphatic Endothelial Cell Roles in Breast Cancer
Source: MDPI journal article supplement (doi:10.3390/cancers15010176), 2022-12-28
Supplement: s1 [file s1]

**Table S29. The antibodies used in study**

| Antibodies for flow cytometry                 |             |             |                   |                |             |
|-----------------------------------------------|-------------|-------------|-------------------|----------------|-------------|
| Antibody                                      | Fluorophore | Clone       | Vander            | Catalog Number | Dilutions   |
| Ly-6G                                         | PE          | 1A8         | BD Pharmingen     | 551461         | 1:200       |
| CD11b                                         | APC         | M1/70       | BD Pharmingen     | 553312         | 3:200       |
| CD45                                          | APC         | 30-F11      | BD Pharmingen     | 559864         | 1:100       |
| Ly-6G                                         | PE/Cyanine7 | 1A8         | BD Pharmingen     | 560601         | 2.5:200     |
| Arginase 1/ARG1                               | PE          | Polyclonal  | R&D Systems       | IC5868P        | 3:100       |
| PE Rat IgG2a, κ Isotype Control               | PE          | R35-95      | BD Pharmingen     | 553930         | 1:200       |
| APC Rat IgG2b, κ Isotype Control              | APC         | A95-1       | BD Pharmingen     | 553991         | 3:200/1:100 |
| PE-Cy™7 Mouse IgG2a, κ Isotype Control        | PE/Cyanine7 | G155-178    | BD Pharmingen     | 557907         | 2.5:200     |
| Sheep IgG PE-conjugated Antibody              | PE          | Polyclonal  | R&D Systems       | IC016P         | 3:100       |
| Antibody for western blot                     |             |             |                   |                |             |
| Antibody                                      | Host        | Clone       | Vander            | Catalog Number | Dilutions   |
| VE-Cadherin                                   | Rabbit      | D87F2       | Cell Signaling    | 2500           | 1:1000      |
| CD54 (ICAM1)                                  | Rabbit      | E3Q9N       | Cell Signaling    | 67836          | 1:1000      |
| GAPDH                                         | Mouse       | 6C5         | Merck Millipore   | MAB374         | 1:5000      |
| Antibody for multi-color immunohistochemistry |             |             |                   |                |             |
| Antibody                                      | Host        | Clone       | Vander            | Catalog Number | Dilutions   |
| Annexin A2 (ANXA2)                            | Rabbit      | D11G2       | Cell Signaling    | 8235           | 1:50        |
| Annexin A1 (ANXA1)                            | Rabbit      | EPR19342    | abcam             | ab222398       | 1:200       |
| S100 alpha 6 (S100A)                          | Rabbit      | EPR13084-69 | abcam             | ab181975       | 1:100       |
| PROX1                                         | Rabbit      | Polyclonal  | abcam             | Ab101851       | 1:200       |
| S100A8 + S100A9                               | Rabbit      | RM1038      | abcam             | Ab288578       | 1:500       |
| Galectin 3 (LGALS3)                           | Rabbit      | A3A12       | abcam             | Ab2785         | 1:250       |
| CCR2                                          | Mouse       | 3G7         | Novus Biologicals | NBP2-35334     | 1:100       |
| Endothelin R Type B (EDNRB)                   | Rabbit      | Polyclonal  | Novus Biologicals | NBP1-31108     | 1:200       |
| CD31                                          | -           | MEC13.3     | Akoya Biosciences | 4250001        | 1:200       |
| CD45                                          | -           | 30-F11      | Akoya Biosciences | 4150002        | 1:200       |
| Ly6G                                          | -           | 1A8         | Akoya Biosciences | 4350015        | 1:200       |
| CD11b                                         | -           | M1/70       | Akoya Biosciences | 4150015        | 1:200       |
| Ki67                                          | -           | B56         | Akoya Biosciences | 4250019        | 1:200       |
