# Supplementary material for: Single-Cell Transcriptomic Profiles of Lung Pre-Metastatic Niche Reveal Neutrophil and Lymphatic Endothelial Cell Roles in Breast Cancer
Source: Cancers (Basel). 2022 Dec 28;15(1):176. doi: 10.3390/cancers15010176 (PMC9818165; doi:10.3390/cancers15010176)
Supplement: Supplementary file 1 [file cancers-15-00176-s001.zip]

Archive with 50 entries (50 files):
- Figure S1.tif
- Figure S10.tif
- Figure S11.tif
- Figure S12.tif
- Figure S13.tif
- Figure S14.tif
- Figure S15.tif
- Figure S16.tif
- Figure S17.tif
- Figure S18.tif
- Figure S19.tif
- Figure S2.tif
- Figure S3.tif
- Figure S4.tif
- Figure S5.tif
- Figure S6.tif
- Figure S7.tif
- Figure S8.tif
- Figure S9.tif
- Supplementary figure legens.pdf
- Supplementary Table legens.pdf
- Table S1.xlsx
- Table S10.xlsx
- Table S11.xlsx
- Table S12.xlsx
- Table S13.xls
- Table S14.csv
- Table S15.xlsx
- Table S16.xlsx
- Table S17.xls
- Table S18.xls
- Table S19.csv
- Table S2.csv
- Table S20.xlsx
- Table S21.xlsx
- Table S22.xlsx
- Table S23.xlsx
- Table S24.xlsx
- Table S25.xlsx
- Table S26.xlsx
- Table S27.xlsx
- Table S28.pdf
- Table S29.pdf
- Table S3.xlsx
- Table S4.xlsx
- Table S5.xlsx
- Table S6.csv
- Table S7.csv
- Table S8.xlsx
- Table S9.xlsx
