# Supplementary material for: Single-Cell Transcriptomic Profiles of Lung Pre-Metastatic Niche Reveal Neutrophil and Lymphatic Endothelial Cell Roles in Breast Cancer
Source: Cancers (Basel). 2022 Dec 28;15(1):176. doi: 10.3390/cancers15010176 (PMC9818165; doi:10.3390/cancers15010176)
Supplement: Supplementary file 1 [file cancers-15-00176-s001.zip › Table S1.xlsx]

## Sheet: sTable 1
Cell types	cell markers										References
Immune cells
Lymphoid cells
Naïve T cells	Cd3e	Lef1	Igfbp4								Sci Adv. 2019 Aug 21;5(8):eaaw8330.doi: 10.1126/sciadv.aaw8330. eCollection 2019 Aug.
Regulatory T cells	Cd3e	Il2ra	Ikzf2	Foxp3							Sci Adv. 2019 Aug 21;5(8):eaaw8330.doi: 10.1126/sciadv.aaw8330. eCollection 2019 Aug.
Effector-memory T cells	Cd3e	Itgb1	C44								Sci Adv. 2019 Aug 21;5(8):eaaw8330.doi: 10.1126/sciadv.aaw8330. eCollection 2019 Aug.	Front Immunol. 2017 Feb 28;8:170. doi: 10.3389/fimmu.2017.00170. eCollection 2017.
NKT1	Klrb1c	ZBTB16									Front Immunol. 2018 Jan 9;8:1950.doi: 10.3389/fimmu.2017.01950. eCollection 2017.
NKT2	ZBTB16										Front Immunol. 2018 Jan 9;8:1950.doi: 10.3389/fimmu.2017.01950. eCollection 2017.
NKT17	ZBTB16	IL23R									Front Immunol. 2018 Jan 9;8:1950.doi: 10.3389/fimmu.2017.01950. eCollection 2017.
iNK cells	Ccr5	Cd27+	Itgam-	Ncr1	Klrb1c						Clin Transl Immunology. 2021 Jan 10;10(1):e1238. doi: 10.1002/cti2.1238. eCollection 2021.
mNK cells	Cx3cr1	Cd27-	Itgam+	Ncr1	Klrb1c						Clin Transl Immunology. 2021 Jan 10;10(1):e1238. doi: 10.1002/cti2.1238. eCollection 2021.
B cells	Cd79a	Cd19	Ms4a1	Ztbt32							Nature. 2020 Nov;587(7835):619-625.
Plasma cells	Cd97a	Cd27									Nature. 2020 Nov;587(7835):619-625.
Myeloid cells
Cxcr2+Ly6g- Granulocytes	Cxcr2	S100a9
Neutrophils	Cxcr2	S100a9	Ly6g
Mast/Basophils	Ccl3	Ifitm1	Ccl4	Mcpt8	Il6						Nat Commun. 2021 Mar 10;12(1):1565.
Alv macrophages	Siglec-F	CD11c	Adgre1(F4/80)	Car4	Plet1	Ear1	Cidec	Krt19			J Immunol. 2021 Sep 15;207(6):1683-1693. doi: 10.4049/jimmunol.2100185.
Intermediated macrophages	C1qa	C1qb	Clqc
Poliferatic Alv macrophages	Siglec-F	CD11c	Adgre1(F4/80)	Car4	Plet1	Ear1	Cidec	Krt19	Top2a	Mki67	J Immunol. 2021 Sep 15;207(6):1683-1693. doi: 10.4049/jimmunol.2100185.
Plasmacytoid Dendritic cells	Siglech	Cd300c	Klk1	Ccr9							Nature. 2020 Nov;587(7835):619-625.
Classical monocytes	CCr2	Cx3cr1low	Csf1r	Ly6c2							https://www.biocompare.com/Editorial-Articles/567890-A-Guide-to-Monocyte-Markers/
Intermediated monocytes	Cd209a	Cd209b	Ly6c2Int								https://www.biocompare.com/Editorial-Articles/567890-A-Guide-to-Monocyte-Markers/
Non-classical monocytes	Cx3cr1	CCr2low	Ly6c2low	Csf1r							https://www.biocompare.com/Editorial-Articles/567890-A-Guide-to-Monocyte-Markers/
Endothelial cells
Systemic venous ECs	pecam1	Cdh5	Nrp2	Meox2	Sparcl1						Circulation. 2021 Jul 27; 144(4): 286–302.
Plumonary venous Ecs	Pecam1	Cdh5	Nrp2	Plvap	Tshz2	Ackr1					Circulation. 2021 Jul 27; 144(4): 286–302.	Sci Adv. 2020 Jul 8;6(28):eaba1983.
Capillaries type I Ecs (Aerocytes)	Pecam1	Cdh5	Ednrb	Tbx2	Tbx3	Car4					Cancer Cell. 2020 Jan 13;37(1):21-36.e13. doi: 10.1016/j.ccell.2019.12.001.	Circulation. 2021 Jul 27; 144(4): 286–302.	Nature. 2020 Nov;587(7835):619-625.
Arterial ECs	Pecam1	Cdh5	Gja4	Gja5	Cytl1	Mgp	DKK2				Circulation. 2021 Jul 27; 144(4): 286–302.	Nature. 2020 Nov;587(7835):619-625.	Cancer Cell. 2020 Jan 13;37(1):21-36.e13. doi: 10.1016/j.ccell.2019.12.001.	Sci Adv. 2020 Jul 8;6(28):eaba1983.
Lymphatic Ecs	Pecam1	Cdh5	Prox1	Pdpn	ccl21a	TBX1					Nature. 2020 Nov;587(7835):619-625.	Cancer Cell. 2020 Jan 13;37(1):21-36.e13. doi: 10.1016/j.ccell.2019.12.001.	Sci Adv. 2020 Jul 8;6(28):eaba1983.
Capillaries type II Ecs	Pecam1	Cdh5	Cd93	Pltp	Aldh2						Nature. 2020 Nov;587(7835):619-625.	Nat Commun. 2021 Mar 10;12(1):1565.
Stromal cells
Pericyte	Pdgfrb	Vtn	Higd1b	Trpc6	postn	gucy1a1	gucy1b1				Nature. 2020 Nov;587(7835):619-625.	Nat Commun. 2021 Mar 10;12(1):1565.
Fibromyo/SMCs	Acta2	Tagln	Aspn								Nature. 2020 Nov;587(7835):619-625.	Nat Commun. 2021 Mar 10;12(1):1565.	EMBO Mol Med. 2021 Apr 9;13(4):e12871.
Adventitial Fibroblast	Pdgfrb	Pdgfra	Pi16	Mfap5							EMBO Mol Med. 2021 Apr 9;13(4):e12871.
Alveolar Fibroblast	Pdgfra	Fgfr3	Nebl
Mesothelial	Msln	Wt1	Krt19								Nature. 2020 Nov;587(7835):619-625.
Satellite glial cells	Cdh19	Plp1	Mpz								Nat Commun. 2020 Sep 29;11(1):4891.
Epithelial cells
Type II Epithelial cells	Epcam	Abca3	Lyz2	Muc1	Sftpb	Sftpc	Lamp3				Nature. 2014 May 15;509(7500):371-5.	Cells. 2020 Nov 11;9(11):2460.
Type I Epithelial cells	Epcam	Pdpn	Aqp5high	Rtkn2	Gprc5ahigh						Nature. 2014 May 15;509(7500):371-5.	Cells. 2020 Nov 11;9(11):2460.
Ciliated cells	Epcam	Foxj1									Nature. 2014 May 15;509(7500):371-5.	Cells. 2020 Nov 11;9(11):2460.
Club cells	Epcam	Scgb1a1high	Scgb3a2high								Nature. 2014 May 15;509(7500):371-5.	Cells. 2020 Nov 11;9(11):2460.
