# Supplementary material for: Single-Cell Transcriptomic Profiles of Lung Pre-Metastatic Niche Reveal Neutrophil and Lymphatic Endothelial Cell Roles in Breast Cancer
Source: Cancers (Basel). 2022 Dec 28;15(1):176. doi: 10.3390/cancers15010176 (PMC9818165; doi:10.3390/cancers15010176)
Supplement: Supplementary file 1 [file cancers-15-00176-s001.zip › Table S2.csv]

status	family	pval	qval	Gene	use_for_ordering
OK	negbinomial.size	1	1	Xkr4	FALSE
OK	negbinomial.size	1	1	Gm1992	FALSE
OK	negbinomial.size	1	1	Gm19938	FALSE
OK	negbinomial.size	1	1	Gm37381	FALSE
OK	negbinomial.size	1	1	Rp1	FALSE
OK	negbinomial.size	1	1	Sox17	FALSE
OK	negbinomial.size	1	1	Gm37587	FALSE
OK	negbinomial.size	1	1	Gm37323	FALSE
OK	negbinomial.size	0.616362003419182	1	Mrpl15	FALSE
OK	negbinomial.size	0.414786226738961	1	Lypla1	TRUE
OK	negbinomial.size	0.738076651411857	1	Tcea1	TRUE
OK	negbinomial.size	1	1	Rgs20	FALSE
OK	negbinomial.size	1	1	Gm16041	FALSE
OK	negbinomial.size	0.539148994622475	1	Atp6v1h	TRUE
OK	negbinomial.size	1	1	Oprk1	FALSE
OK	negbinomial.size	1	1	Npbwr1	FALSE
OK	negbinomial.size	0.0045028074284963	0.0910301100513249	Rb1cc1	TRUE
OK	negbinomial.size	0.400558346528556	1	4732440D04Rik	FALSE
OK	negbinomial.size	1	1	Alkal1	FALSE
OK	negbinomial.size	1	1	St18	FALSE
OK	negbinomial.size	0.558316003053926	1	Pcmtd1	TRUE
OK	negbinomial.size	1	1	Gm26901	FALSE
OK	negbinomial.size	1	1	Gm30414	FALSE
OK	negbinomial.size	1	1	Sntg1	FALSE
OK	negbinomial.size	0.20295705577935	1	Rrs1	FALSE
OK	negbinomial.size	1	1	Adhfe1	FALSE
OK	negbinomial.size	0.254139281672318	1	2610203C22Rik	FALSE
OK	negbinomial.size	1	1	Vxn	FALSE
OK	negbinomial.size	1	1	Gm29520	FALSE
OK	negbinomial.size	0.645485094849283	1	Mybl1	FALSE
OK	negbinomial.size	0.0779323485082758	0.749680363260547	Vcpip1	TRUE
OK	negbinomial.size	1	1	1700034P13Rik	FALSE
OK	negbinomial.size	0.518559416474347	1	Sgk3	TRUE
OK	negbinomial.size	0.139368132700555	1	Mcmdc2	FALSE
OK	negbinomial.size	0.355109874785603	1	Snhg6	FALSE
OK	negbinomial.size	1	1	Tcf24	FALSE
OK	negbinomial.size	1	1	Ppp1r42	FALSE
OK	negbinomial.size	1	1	Gm15818	FALSE
OK	negbinomial.size	0.419233477735279	1	Cops5	TRUE
OK	negbinomial.size	0.544327087642711	1	Cspp1	TRUE
OK	negbinomial.size	0.0909081645794452	0.817206498490226	Arfgef1	TRUE
OK	negbinomial.size	1	1	Cpa6	FALSE
OK	negbinomial.size	1	1	Prex2	FALSE
OK	negbinomial.size	1	1	A830018L16Rik	FALSE
OK	negbinomial.size	1	1	Gm17644	FALSE
OK	negbinomial.size	1	1	Gm29663	FALSE
OK	negbinomial.size	1	1	Sulf1	FALSE
OK	negbinomial.size	0.155976190043622	1	Slco5a1	FALSE
OK	negbinomial.size	1	1	Gm29283	FALSE
OK	negbinomial.size	1	1	Prdm14	FALSE
OK	negbinomial.size	0.00179654817611844	0.0433930306658719	Ncoa2	TRUE
OK	negbinomial.size	1	1	Gm29570	FALSE
OK	negbinomial.size	0.0731403259211415	0.718410608674762	Tram1	TRUE
OK	negbinomial.size	0.57390897753264	1	Lactb2	FALSE
OK	negbinomial.size	1	1	Xkr9	FALSE
OK	negbinomial.size	0.60753149324615	1	Eya1	FALSE
OK	negbinomial.size	1	1	Gm9947	FALSE
OK	negbinomial.size	1	1	Msc	FALSE
OK	negbinomial.size	1	1	Trpa1	FALSE
OK	negbinomial.size	1	1	Kcnb2	FALSE
OK	negbinomial.size	0.0775467071096928	0.747589495183049	Terf1	FALSE
OK	negbinomial.size	1	1	Sbspon	FALSE
OK	negbinomial.size	1	1	4930444P10Rik	FALSE
OK	negbinomial.size	0.00992847556560789	0.171016930883027	Rpl7	TRUE
OK	negbinomial.size	0.131661827662723	1	Rdh10	FALSE
OK	negbinomial.size	1	1	Gm28095	FALSE
OK	negbinomial.size	0.204674538973978	1	Stau2	FALSE
OK	negbinomial.size	1	1	Gm7568	FALSE
OK	negbinomial.size	0.460758441621911	1	Ube2w	TRUE
OK	negbinomial.size	0.427915291940599	1	Eloc	TRUE
OK	negbinomial.size	1	1	D030040B21Rik	FALSE
OK	negbinomial.size	0.980442374618969	1	Tmem70	FALSE
OK	negbinomial.size	0.0447214526575799	0.515015443194165	Ly96	TRUE
OK	negbinomial.size	1	1	Gm28376	FALSE
OK	negbinomial.size	1	1	Jph1	FALSE
OK	negbinomial.size	1	1	Gm28783	FALSE
OK	negbinomial.size	1	1	Gdap1	FALSE
OK	negbinomial.size	1	1	Gm28784	FALSE
OK	negbinomial.size	1	1	Pi15	FALSE
OK	negbinomial.size	1	1	Gm28154	FALSE
OK	negbinomial.size	1	1	Gm16070	FALSE
OK	negbinomial.size	1	1	Crispld1	FALSE
OK	negbinomial.size	1	1	Gm28153	FALSE
OK	negbinomial.size	1	1	Gm28756	FALSE
OK	negbinomial.size	1	1	Crisp4	FALSE
OK	negbinomial.size	1	1	Defb18	FALSE
OK	negbinomial.size	1	1	Defb41	FALSE
OK	negbinomial.size	1	1	Gm15825	FALSE
OK	negbinomial.size	1	1	Tfap2d	FALSE
OK	negbinomial.size	1	1	Tfap2b	FALSE
OK	negbinomial.size	1	1	Gm28340	FALSE
OK	negbinomial.size	1	1	Pkhd1	FALSE
OK	negbinomial.size	1	1	4930486I03Rik	FALSE
OK	negbinomial.size	1	1	Gm28653	FALSE
OK	negbinomial.size	1	1	Il17a	FALSE
OK	negbinomial.size	1	1	Il17f	FALSE
OK	negbinomial.size	0.674027064467183	1	Mcm3	FALSE
OK	negbinomial.size	1	1	Gm28065	FALSE
OK	negbinomial.size	1	1	6720483E21Rik	FALSE
OK	negbinomial.size	0.410996200209089	1	Paqr8	FALSE
OK	negbinomial.size	1	1	Efhc1	FALSE
OK	negbinomial.size	0.801984915070918	1	Tram2	FALSE
OK	negbinomial.size	1	1	Gm28287	FALSE
OK	negbinomial.size	0.279194165483698	1	Tmem14a	FALSE
OK	negbinomial.size	1	1	Gsta3	FALSE
OK	negbinomial.size	1	1	Gm28836	FALSE
OK	negbinomial.size	1	1	Khdc1a	FALSE
OK	negbinomial.size	1	1	Khdc1c	FALSE
OK	negbinomial.size	1	1	Khdc1b	FALSE
OK	negbinomial.size	1	1	Kcnq5	FALSE
OK	negbinomial.size	1	1	Rims1	FALSE
OK	negbinomial.size	1	1	Gm29506	FALSE
OK	negbinomial.size	1	1	4933415F23Rik	FALSE
OK	negbinomial.size	1	1	Gm27028	FALSE
OK	negbinomial.size	0.900498766703851	1	Gm29107	FALSE
OK	negbinomial.size	0.232650125818071	1	Ogfrl1	TRUE
OK	negbinomial.size	1	1	Gm28822	FALSE
OK	negbinomial.size	0.900498766703832	1	B3gat2	FALSE
OK	negbinomial.size	0.0278488151192179	0.368782358734777	Smap1	TRUE
OK	negbinomial.size	0.314311138483983	1	Sdhaf4	FALSE
OK	negbinomial.size	0.000485621985344581	0.0140634355358586	Fam135a	FALSE
OK	negbinomial.size	1	1	Col9a1	FALSE
OK	negbinomial.size	1	1	Col19a1	FALSE
OK	negbinomial.size	0.0270258658683214	0.361297282306809	Lmbrd1	TRUE
OK	negbinomial.size	1	1	Gm28237	FALSE
OK	negbinomial.size	1	1	Gm29414	FALSE
OK	negbinomial.size	1	1	Adgrb3	FALSE
OK	negbinomial.size	3.48169502668514e-05	0.00134130533017279	4931408C20Rik	FALSE
OK	negbinomial.size	1	1	Gm5524	FALSE
OK	negbinomial.size	1	1	Gm597	FALSE
OK	negbinomial.size	1	1	Gm9898	FALSE
OK	negbinomial.size	0.000842611607371949	0.0226416760664237	Phf3	TRUE
OK	negbinomial.size	0.0852304840841889	0.786663187736988	Ptp4a1	FALSE
OK	negbinomial.size	1	1	Gm5698	FALSE
OK	negbinomial.size	1	1	4931428L18Rik	FALSE
OK	negbinomial.size	1	1	Gm28644	FALSE
OK	negbinomial.size	1	1	Gm29128	FALSE
OK	negbinomial.size	1	1	Lgsn	FALSE
OK	negbinomial.size	1	1	Pih1d3	FALSE
OK	negbinomial.size	1	1	Khdrbs2	FALSE
OK	negbinomial.size	1	1	Gm5415	FALSE
OK	negbinomial.size	1	1	Gm37724	FALSE
OK	negbinomial.size	1	1	Gm37591	FALSE
OK	negbinomial.size	0.172718390515736	1	Prim2	FALSE
OK	negbinomial.size	0.467166126042484	1	Rab23	FALSE
OK	negbinomial.size	0.380541869574323	1	Bag2	FALSE
OK	negbinomial.size	0.366145837210317	1	Zfp451	TRUE
OK	negbinomial.size	0.237048235689205	1	Bend6	FALSE
OK	negbinomial.size	0.0446393794685596	0.51498990732154	Dst	FALSE
OK	negbinomial.size	1	1	Gm26788	FALSE
OK	negbinomial.size	1	1	Gm37958	FALSE
OK	negbinomial.size	0.0587501212257465	0.623362204866663	Gm37233	FALSE
OK	negbinomial.size	0.623824900462841	1	Ccdc115	TRUE
OK	negbinomial.size	1	1	Gm28306	FALSE
OK	negbinomial.size	0.319614062195958	1	Imp4	FALSE
OK	negbinomial.size	1.72342683962723e-09	1.27751490675357e-07	Ptpn18	TRUE
OK	negbinomial.size	0.369804758307477	1	Gm28417	FALSE
OK	negbinomial.size	1	1	4930568A12Rik	FALSE
OK	negbinomial.size	1	1	Prss39	FALSE
OK	negbinomial.size	1	1	Cfc1	FALSE
OK	negbinomial.size	1	1	Prss40	FALSE
OK	negbinomial.size	1	1	1700101I19Rik	FALSE
OK	negbinomial.size	1	1	Amer3	FALSE
OK	negbinomial.size	0.815819386776468	1	Arhgef4	FALSE
OK	negbinomial.size	0.156772084092458	1	Gm38336	FALSE
OK	negbinomial.size	0.00197070050581554	0.0466558280543481	Fam168b	TRUE
OK	negbinomial.size	0.173877399008308	1	Plekhb2	TRUE
OK	negbinomial.size	1	1	Gm37068	FALSE
OK	negbinomial.size	1	1	Gm28415	FALSE
OK	negbinomial.size	1	1	1110002O04Rik	FALSE
OK	negbinomial.size	1	1	Gm37146	FALSE
OK	negbinomial.size	1	1	Gm33222	FALSE
OK	negbinomial.size	1	1	4930535G08Rik	FALSE
OK	negbinomial.size	0.0778915765799065	0.749511753750846	Hs6st1	TRUE
OK	negbinomial.size	1	1	Gm37335	FALSE
OK	negbinomial.size	1	1	Gm33280	FALSE
OK	negbinomial.size	0.847155082714168	1	Uggt1	TRUE
OK	negbinomial.size	0.00202567962733409	0.0474350323771879	Neurl3	TRUE
OK	negbinomial.size	1.52572528454771e-06	7.73537921387433e-05	Arid5a	TRUE
OK	negbinomial.size	1	1	4930403P22Rik	FALSE
OK	negbinomial.size	0.00169665271220529	0.0413112805840162	Kansl3	TRUE
OK	negbinomial.size	1	1	Fer1l5	FALSE
OK	negbinomial.size	0.382956400108075	1	Lman2l	FALSE
OK	negbinomial.size	0.713730229527474	1	Cnnm4	TRUE
OK	negbinomial.size	0.416325784090659	1	Cnnm3	FALSE
OK	negbinomial.size	1	1	Gm38033	FALSE
OK	negbinomial.size	0.38054186957433	1	Ankrd23	FALSE
OK	negbinomial.size	0.344973230447077	1	Ankrd39	FALSE
OK	negbinomial.size	0.200511477173063	1	Sema4c	FALSE
OK	negbinomial.size	0.15597619004362	1	D430040D24Rik	FALSE
OK	negbinomial.size	1	1	Fam178b	FALSE
OK	negbinomial.size	0.00199279268029466	0.0469033576467893	Cox5b	TRUE
OK	negbinomial.size	0.797823387538482	1	Actr1b	FALSE
OK	negbinomial.size	1	1	4933424G06Rik	FALSE
OK	negbinomial.size	1	1	Gm33533	FALSE
OK	negbinomial.size	0.410996200209087	1	Zap70	FALSE
OK	negbinomial.size	3.32754677340062e-05	0.00128345389603233	Tmem131	TRUE
OK	negbinomial.size	7.25889047814215e-06	0.000323291330756483	Gm38115	TRUE
OK	negbinomial.size	0.645485094849323	1	Vwa3b	FALSE
OK	negbinomial.size	1	1	Gm37020	FALSE
OK	negbinomial.size	1	1	Cnga3	FALSE
OK	negbinomial.size	0.785079251925551	1	Inpp4a	TRUE
OK	negbinomial.size	1	1	4930439A04Rik	FALSE
OK	negbinomial.size	0.219672953076527	1	Coa5	TRUE
OK	negbinomial.size	0.784290121099751	1	Unc50	TRUE
OK	negbinomial.size	0.140595408981753	1	Mgat4a	FALSE
OK	negbinomial.size	1	1	2010300C02Rik	FALSE
OK	negbinomial.size	1	1	4930556I23Rik	FALSE
OK	negbinomial.size	0.721638069414129	1	Tsga10	FALSE
OK	negbinomial.size	1	1	Gm26805	FALSE
OK	negbinomial.size	1	1	Lipt1	FALSE
OK	negbinomial.size	0.715622001480805	1	Mitd1	FALSE
OK	negbinomial.size	0.000129405975322847	0.00438308369147605	Mrpl30	TRUE
OK	negbinomial.size	1	1	Lyg2	FALSE
OK	negbinomial.size	1	1	Gm15457	FALSE
OK	negbinomial.size	1	1	Lyg1	FALSE
OK	negbinomial.size	0.676134647465333	1	Txndc9	TRUE
OK	negbinomial.size	0.425830895051825	1	Eif5b	TRUE
OK	negbinomial.size	0.193139214030596	1	Rev1	FALSE
OK	negbinomial.size	1	1	Gm37062	FALSE
OK	negbinomial.size	1	1	Gm5099	FALSE
OK	negbinomial.size	0.335682776191591	1	Aff3	FALSE
OK	negbinomial.size	1	1	Gm16150	FALSE
OK	negbinomial.size	1	1	Gm16151	FALSE
OK	negbinomial.size	1	1	Gm16152	FALSE
OK	negbinomial.size	1	1	Lonrf2	FALSE
OK	negbinomial.size	0.645485094849321	1	Chst10	FALSE
OK	negbinomial.size	1	1	Gm37707	FALSE
OK	negbinomial.size	1	1	Nms	FALSE
OK	negbinomial.size	0.540682653991863	1	Pdcl3	TRUE
OK	negbinomial.size	1	1	Gm37821	FALSE
OK	negbinomial.size	1	1	Npas2	FALSE
OK	negbinomial.size	3.39167328499934e-12	3.26461209178519e-10	Rpl31	TRUE
OK	negbinomial.size	3.67271972747498e-07	2.09209167044387e-05	Tbc1d8	TRUE
OK	negbinomial.size	0.250493743279876	1	Cnot11	FALSE
OK	negbinomial.size	0.0262217938129986	0.354099795805327	Gm15832	TRUE
OK	negbinomial.size	0.000267031889141747	0.0083215340248658	Rnf149	TRUE
OK	negbinomial.size	0.36362764336509	1	Creg2	FALSE
OK	negbinomial.size	1	1	D930019O06Rik	FALSE
OK	negbinomial.size	1	1	Rfx8	FALSE
OK	negbinomial.size	1	1	Gm3646	FALSE
OK	negbinomial.size	1	1	1700066B17Rik	FALSE
OK	negbinomial.size	0.003901041965408	0.0811019330590464	Map4k4	TRUE
OK	negbinomial.size	7.46362553022954e-11	6.43488249257357e-09	Il1r2	TRUE
OK	negbinomial.size	0.645485094849275	1	Gm16894	FALSE
OK	negbinomial.size	0.0113636180826385	0.190135373708803	Il1r1	FALSE
OK	negbinomial.size	0.0161700838512721	0.24899921384158	Il1rl2	FALSE
OK	negbinomial.size	0.112446666169946	0.919797755111626	Il1rl1	FALSE
OK	negbinomial.size	0.000368148319404732	0.0111237171185317	Il18r1	FALSE
OK	negbinomial.size	0.967104174520553	1	Il18rap	FALSE
OK	negbinomial.size	1	1	Gm35801	FALSE
OK	negbinomial.size	0.583725045813822	1	Slc9a4	FALSE
OK	negbinomial.size	1	1	Slc9a2	FALSE
OK	negbinomial.size	1	1	Gm37623	FALSE
OK	negbinomial.size	1	1	Gm37915	FALSE
OK	negbinomial.size	0.607531493246162	1	Mfsd9	FALSE
OK	negbinomial.size	1	1	Tmem182	FALSE
OK	negbinomial.size	1	1	4930448I06Rik	FALSE
OK	negbinomial.size	1	1	Gm28634	FALSE
OK	negbinomial.size	1	1	Gm29260	FALSE
OK	negbinomial.size	1	1	Gm9915	FALSE
OK	negbinomial.size	1	1	Gm29664	FALSE
OK	negbinomial.size	1	1	Gm28175	FALSE
OK	negbinomial.size	1	1	Gm28140	FALSE
OK	negbinomial.size	1	1	Pantr1	FALSE
OK	negbinomial.size	1	1	Gm20646	FALSE
OK	negbinomial.size	1	1	Pou3f3	FALSE
OK	negbinomial.size	1	1	Pantr2	FALSE
OK	negbinomial.size	1	1	Dalir	FALSE
OK	negbinomial.size	0.395618424948122	1	Mrps9	TRUE
OK	negbinomial.size	1	1	Gpr45	FALSE
OK	negbinomial.size	0.759298140657153	1	Tgfbrap1	FALSE
OK	negbinomial.size	1	1	Gm28782	FALSE
OK	negbinomial.size	0.171657242567789	1	8430432A02Rik	FALSE
OK	negbinomial.size	0.296455819074791	1	AI597479	FALSE
OK	negbinomial.size	1	1	Fhl2	FALSE
OK	negbinomial.size	1	1	Gm29040	FALSE
OK	negbinomial.size	0.198399989809033	1	Nck2	FALSE
OK	negbinomial.size	1	1	Ecrg4	FALSE
OK	negbinomial.size	1	1	Gm29155	FALSE
OK	negbinomial.size	1	1	Gm29157	FALSE
OK	negbinomial.size	1	1	Gm29156	FALSE
OK	negbinomial.size	0.0964926824676244	0.843275768828185	Uxs1	FALSE
OK	negbinomial.size	0.0032415338281673	0.0698218158244853	Tpp2	TRUE
OK	negbinomial.size	1	1	Mettl21c	FALSE
OK	negbinomial.size	0.565467661918152	1	Gm8251	FALSE
OK	negbinomial.size	0.122830255646494	0.970512519804261	Tex30	FALSE
OK	negbinomial.size	0.584134451285929	1	Poglut2	FALSE
OK	negbinomial.size	0.683347911127052	1	Bivm	FALSE
OK	negbinomial.size	0.510091775871121	1	Ercc5	FALSE
OK	negbinomial.size	1	1	Mettl21e	FALSE
OK	negbinomial.size	1	1	Gm28893	FALSE
OK	negbinomial.size	1	1	Gulp1	FALSE
OK	negbinomial.size	1	1	4930521E06Rik	FALSE
OK	negbinomial.size	1	1	Col3a1	FALSE
OK	negbinomial.size	1	1	Col5a2	FALSE
OK	negbinomial.size	0.597476840969865	1	Wdr75	FALSE
OK	negbinomial.size	1	1	Gm5269	FALSE
OK	negbinomial.size	0.122685636434929	0.970082968819095	Slc40a1	FALSE
OK	negbinomial.size	1	1	Dnah7b	FALSE
OK	negbinomial.size	1	1	Dnah7c	FALSE
OK	negbinomial.size	0.00554154127038363	0.107642770038265	Slc39a10	FALSE
OK	negbinomial.size	0.516784597278793	1	Gm28151	FALSE
OK	negbinomial.size	1	1	Gm28826	FALSE
OK	negbinomial.size	1	1	C230029F24Rik	FALSE
OK	negbinomial.size	1	1	4933411E06Rik	FALSE
OK	negbinomial.size	1	1	Gm29665	FALSE
OK	negbinomial.size	1	1	Gm28321	FALSE
OK	negbinomial.size	1	1	Tmeff2	FALSE
OK	negbinomial.size	1	1	Gm28322	FALSE
OK	negbinomial.size	1	1	Gm28319	FALSE
OK	negbinomial.size	1	1	Gm28320	FALSE
OK	negbinomial.size	1	1	Gm29325	FALSE
OK	negbinomial.size	1	1	9330175M20Rik	FALSE
OK	negbinomial.size	0.472089496153574	1	Cavin2	FALSE
OK	negbinomial.size	1	1	1700072G22Rik	FALSE
OK	negbinomial.size	2.77463276198819e-07	1.59764345375552e-05	Nabp1	TRUE
OK	negbinomial.size	0.300794434159088	1	Gm17767	FALSE
OK	negbinomial.size	1	1	Gm28055	FALSE
OK	negbinomial.size	0.226277518543163	1	Myo1b	FALSE
OK	negbinomial.size	1	1	Gm29453	FALSE
OK	negbinomial.size	1	1	Gm28323	FALSE
OK	negbinomial.size	0.00241971878114073	0.0549463606323118	Stat4	FALSE
OK	negbinomial.size	1	1	Gm31812	FALSE
OK	negbinomial.size	0.00218125483979134	0.0504190410817719	Stat1	TRUE
OK	negbinomial.size	0.916430686591746	1	Gls	TRUE
OK	negbinomial.size	0.000143066118235946	0.00476566837036992	Nab1	TRUE
OK	negbinomial.size	1	1	Gm553	FALSE
OK	negbinomial.size	1	1	Gm28178	FALSE
OK	negbinomial.size	0.546541537040965	1	Nemp2	FALSE
OK	negbinomial.size	0.505873734300302	1	Mfsd6	TRUE
OK	negbinomial.size	0.265463314221678	1	Gm29670	FALSE
OK	negbinomial.size	2.41040348187292e-05	0.00095836572469781	Inpp1	TRUE
OK	negbinomial.size	0.16892766367662	1	Hibch	FALSE
OK	negbinomial.size	1	1	1700019D03Rik	FALSE
OK	negbinomial.size	1	1	Mstn	FALSE
OK	negbinomial.size	1	1	1700019A02Rik	FALSE
OK	negbinomial.size	0.159142024764892	1	Pms1	FALSE
OK	negbinomial.size	1	1	Gm28777	FALSE
OK	negbinomial.size	0.106077076146313	0.891440010512863	Ormdl1	FALSE
OK	negbinomial.size	0.801445073655577	1	Osgepl1	FALSE
OK	negbinomial.size	0.764265747033965	1	Asnsd1	TRUE
OK	negbinomial.size	1	1	Asdurf	FALSE
OK	negbinomial.size	1	1	Dnah7a	FALSE
OK	negbinomial.size	7.06222825741222e-07	3.79535916933762e-05	Stk17b	TRUE
OK	negbinomial.size	0.25413928167231	1	Hecw2	FALSE
OK	negbinomial.size	1	1	Ccdc150	FALSE
OK	negbinomial.size	0.292780304143343	1	Gtf3c3	FALSE
OK	negbinomial.size	1	1	Gm34066	FALSE
OK	negbinomial.size	0.270275036977575	1	Pgap1	TRUE
OK	negbinomial.size	1.27219518930273e-05	0.000536936307317624	Ankrd44	TRUE
OK	negbinomial.size	1	1	4930444A19Rik	FALSE
OK	negbinomial.size	9.05451856447498e-06	0.0003972285049136	Sf3b1	TRUE
OK	negbinomial.size	0.0674261915519003	0.683697341695291	Coq10b	TRUE
OK	negbinomial.size	0.0286340340004507	0.376554756173349	Hspd1	TRUE
OK	negbinomial.size	1.43243493458956e-06	7.28530985265621e-05	Hspe1	TRUE
OK	negbinomial.size	0.232717027864976	1	Mob4	TRUE
OK	negbinomial.size	0.380541869574309	1	Rftn2	FALSE
OK	negbinomial.size	1	1	Gm10561	FALSE
OK	negbinomial.size	0.301622241873657	1	Mars2	FALSE
OK	negbinomial.size	1	1	Boll	FALSE
OK	negbinomial.size	0.389615907368643	1	Plcl1	FALSE
OK	negbinomial.size	1	1	9130227L01Rik	FALSE
OK	negbinomial.size	1	1	1700003I22Rik	FALSE
OK	negbinomial.size	1	1	Gm28240	FALSE
OK	negbinomial.size	1	1	Hsfy2	FALSE
OK	negbinomial.size	0.516784597278808	1	Satb2	FALSE
OK	negbinomial.size	1	1	9130024F11Rik	FALSE
OK	negbinomial.size	1	1	1700126A01Rik	FALSE
OK	negbinomial.size	1	1	BC055402	FALSE
OK	negbinomial.size	1	1	4930558J18Rik	FALSE
OK	negbinomial.size	0.454690955302215	1	1700066M21Rik	FALSE
OK	negbinomial.size	0.118096506501979	0.9498682594553	Tyw5	FALSE
OK	negbinomial.size	0.291726223502726	1	Maip1	FALSE
OK	negbinomial.size	1	1	Spats2l	FALSE
OK	negbinomial.size	1	1	Gm17234	FALSE
OK	negbinomial.size	0.401241412097525	1	Kctd18	FALSE
OK	negbinomial.size	1	1	Sgo2a	FALSE
OK	negbinomial.size	1	1	Aox1	FALSE
OK	negbinomial.size	0.448549352220405	1	Aox3	FALSE
OK	negbinomial.size	1	1	Aox4	FALSE
OK	negbinomial.size	1	1	Gm15759	FALSE
OK	negbinomial.size	1	1	Aox2	FALSE
OK	negbinomial.size	0.385767505777443	1	Bzw1	TRUE
OK	negbinomial.size	0.0932098052525611	0.824883917265431	Clk1	TRUE
OK	negbinomial.size	0.0775625400678037	0.747589495183049	Ppil3	FALSE
OK	negbinomial.size	0.581780904562368	1	Nif3l1	FALSE
OK	negbinomial.size	0.282877644845208	1	Orc2	FALSE
OK	negbinomial.size	1	1	Gm15834	FALSE
OK	negbinomial.size	0.181192813236619	1	Fam126b	FALSE
OK	negbinomial.size	2.54926038292065e-05	0.00100860001285002	Ndufb3	TRUE
OK	negbinomial.size	0.46716612604247	1	Flacc1	FALSE
OK	negbinomial.size	0.5336438883975	1	Cflar	TRUE
OK	negbinomial.size	0.00794061128373376	0.143041905499439	Casp8	TRUE
OK	negbinomial.size	0.425192404947446	1	Trak2	TRUE
OK	negbinomial.size	0.263010061312162	1	Stradb	FALSE
OK	negbinomial.size	1	1	C2cd6	FALSE
OK	negbinomial.size	1	1	AC169382.1	FALSE
OK	negbinomial.size	1	1	Gm29018	FALSE
OK	negbinomial.size	0.132740550983759	1	Tmem237	FALSE
OK	negbinomial.size	0.607531493246165	1	G730003C15Rik	FALSE
OK	negbinomial.size	1	1	Mpp4	FALSE
OK	negbinomial.size	1	1	Gm29017	FALSE
OK	negbinomial.size	0.133911940640589	1	Als2	FALSE
OK	negbinomial.size	1	1	Cdk15	FALSE
OK	negbinomial.size	1	1	Gm29016	FALSE
OK	negbinomial.size	0.0164238975277444	0.2519450883835	Fzd7	FALSE
OK	negbinomial.size	1	1	Gm26813	FALSE
OK	negbinomial.size	1	1	Gm973	FALSE
OK	negbinomial.size	1	1	Gm28411	FALSE
OK	negbinomial.size	1	1	1700122D07Rik	FALSE
OK	negbinomial.size	0.580358862264623	1	Sumo1	TRUE
OK	negbinomial.size	0.0181219601603013	0.273825025946071	Nop58	FALSE
OK	negbinomial.size	0.0140395387200878	0.222834257100466	Bmpr2	TRUE
OK	negbinomial.size	0.673114191291215	1	Fam117b	TRUE
OK	negbinomial.size	0.607531493246113	1	Ica1l	FALSE
OK	negbinomial.size	0.312598032028128	1	Wdr12	FALSE
OK	negbinomial.size	0.0866008043014404	0.794211281692684	Carf	FALSE
OK	negbinomial.size	0.716422735523031	1	Nbeal1	TRUE
OK	negbinomial.size	0.490582728936625	1	Cyp20a1	FALSE
OK	negbinomial.size	0.407387661997294	1	Abi2	FALSE
OK	negbinomial.size	0.853187465962643	1	Raph1	TRUE
OK	negbinomial.size	0.621606489807912	1	Cd28	FALSE
OK	negbinomial.size	1	1	Gm11579	FALSE
OK	negbinomial.size	1	1	2310016D23Rik	FALSE
OK	negbinomial.size	0.467166126042466	1	Ctla4	FALSE
OK	negbinomial.size	0.645485094849294	1	Icos	FALSE
OK	negbinomial.size	1	1	Gm28083	FALSE
OK	negbinomial.size	1	1	Gm11587	FALSE
OK	negbinomial.size	1	1	9530026F06Rik	FALSE
OK	negbinomial.size	1	1	Gm11588	FALSE
OK	negbinomial.size	1	1	Gm28449	FALSE
OK	negbinomial.size	1	1	4930587A21Rik	FALSE
OK	negbinomial.size	0.645485094849302	1	Pard3b	FALSE
OK	negbinomial.size	1	1	Pard3bos1	FALSE
OK	negbinomial.size	1	1	Pard3bos2	FALSE
OK	negbinomial.size	1	1	Pard3bos3	FALSE
OK	negbinomial.size	1	1	Gm29084	FALSE
OK	negbinomial.size	0.00595259700769463	0.113552238008338	Nrp2	FALSE
OK	negbinomial.size	1	1	Gm29083	FALSE
OK	negbinomial.size	1	1	Gm4208	FALSE
OK	negbinomial.size	0.109350952285174	0.906965803654644	Ino80d	TRUE
OK	negbinomial.size	0.560968505890994	1	Ino80dos	FALSE
OK	negbinomial.size	0.000528246241626753	0.0151851580956674	Gm20342	FALSE
OK	negbinomial.size	0.999746342175684	1	Ndufs1	FALSE
OK	negbinomial.size	1.59521319671833e-07	9.54316317777041e-06	Eef1b2	TRUE
OK	negbinomial.size	1	1	Gpr1	FALSE
OK	negbinomial.size	1	1	Platr12	FALSE
OK	negbinomial.size	1	1	Gm11608	FALSE
OK	negbinomial.size	1	1	Zdbf2	FALSE
OK	negbinomial.size	6.01607492129629e-06	0.000272838728322361	Adam23	FALSE
OK	negbinomial.size	1	1	Gm39653	FALSE
OK	negbinomial.size	1	1	Dytn	FALSE
OK	negbinomial.size	1	1	Mdh1b	FALSE
OK	negbinomial.size	0.200051328880806	1	Fastkd2	FALSE
OK	negbinomial.size	1	1	4933402D24Rik	FALSE
OK	negbinomial.size	1	1	Gm13749	FALSE
OK	negbinomial.size	0.0154821439719596	0.240357117176619	Klf7	TRUE
OK	negbinomial.size	1	1	Gm13748	FALSE
OK	negbinomial.size	1	1	Gm28981	FALSE
OK	negbinomial.size	0.0537677368893224	0.58750954794856	Creb1	TRUE
OK	negbinomial.size	0.493592133445676	1	Mettl21a	FALSE
OK	negbinomial.size	1	1	Gm28982	FALSE
OK	negbinomial.size	1	1	Gm29152	FALSE
OK	negbinomial.size	0.726429969744965	1	2810408I11Rik	FALSE
OK	negbinomial.size	0.567524167894515	1	Ccnyl1	FALSE
OK	negbinomial.size	0.885062618253375	1	Fzd5	FALSE
OK	negbinomial.size	0.179485874725713	1	Plekhm3	TRUE
OK	negbinomial.size	1	1	Akr1cl	FALSE
OK	negbinomial.size	1	1	Cryge	FALSE
OK	negbinomial.size	1	1	Crygd	FALSE
OK	negbinomial.size	1	1	Crygc	FALSE
OK	negbinomial.size	1	1	Crygb	FALSE
OK	negbinomial.size	1	1	Cryga	FALSE
OK	negbinomial.size	0.607531493246139	1	D630023F18Rik	FALSE
OK	negbinomial.size	2.09708479326042e-08	1.39290053213487e-06	Idh1	TRUE
OK	negbinomial.size	0.123697803711944	0.972046795952536	Pikfyve	TRUE
OK	negbinomial.size	1	1	Pth2r	FALSE
OK	negbinomial.size	1	1	Crygf	FALSE
OK	negbinomial.size	1	1	Map2	FALSE
OK	negbinomial.size	1	1	Gm10558	FALSE
OK	negbinomial.size	1	1	Unc80	FALSE
OK	negbinomial.size	0.112047069668084	0.919170962216467	Rpe	TRUE
OK	negbinomial.size	0.0252422300294894	0.345180537447365	Kansl1l	FALSE
OK	negbinomial.size	0.951984676846876	1	Acadl	TRUE
OK	negbinomial.size	1	1	Myl1	FALSE
OK	negbinomial.size	0.333280886342769	1	Lancl1	FALSE
OK	negbinomial.size	1	1	Cps1	FALSE
OK	negbinomial.size	1	1	Gm15668	FALSE
OK	negbinomial.size	1	1	Gm15669	FALSE
OK	negbinomial.size	1	1	Gm15671	FALSE
OK	negbinomial.size	1	1	Erbb4	FALSE
OK	negbinomial.size	1	1	Gm16076	FALSE
OK	negbinomial.size	1	1	Gm28497	FALSE
OK	negbinomial.size	1	1	Gm29113	FALSE
OK	negbinomial.size	1	1	Gm29114	FALSE
OK	negbinomial.size	0.332238400915929	1	Ikzf2	FALSE
OK	negbinomial.size	1	1	Gm29112	FALSE
OK	negbinomial.size	1	1	Gm28112	FALSE
OK	negbinomial.size	1	1	Spag16	FALSE
OK	negbinomial.size	1	1	Vwc2l	FALSE
OK	negbinomial.size	0.0254158552037355	0.347260275866302	Bard1	FALSE
OK	negbinomial.size	1	1	Abca12	FALSE
OK	negbinomial.size	0.840414777022248	1	Atic	FALSE
OK	negbinomial.size	2.51316342127034e-251	8.1036954518862e-247	Fn1	TRUE
OK	negbinomial.size	0.410996200209103	1	Apol7d	FALSE
OK	negbinomial.size	1	1	Gm8883	FALSE
OK	negbinomial.size	1	1	Gm28818	FALSE
OK	negbinomial.size	0.380541869574332	1	4933417E11Rik	FALSE
OK	negbinomial.size	1	1	4930556G22Rik	FALSE
OK	negbinomial.size	0.380541869574316	1	Gm4319	FALSE
OK	negbinomial.size	0.155976190043622	1	Mreg	FALSE
OK	negbinomial.size	0.592090604009766	1	Pecr	FALSE
OK	negbinomial.size	1	1	Tmem169	FALSE
OK	negbinomial.size	0.607531493246142	1	Xrcc5	FALSE
OK	negbinomial.size	1	1	March4	FALSE
OK	negbinomial.size	0.431432909739582	1	Smarcal1	FALSE
OK	negbinomial.size	1	1	Gm39662	FALSE
OK	negbinomial.size	1	1	Ankar	FALSE
OK	negbinomial.size	7.77774204544242e-06	0.000344496280570454	Rpl37a	TRUE
OK	negbinomial.size	0.51678459727882	1	Igfbp2	FALSE
OK	negbinomial.size	1	1	Igfbp5	FALSE
OK	negbinomial.size	1	1	1700027A15Rik	FALSE
OK	negbinomial.size	1	1	Tnp1	FALSE
OK	negbinomial.size	1	1	Gm29185	FALSE
OK	negbinomial.size	1	1	Pinc	FALSE
OK	negbinomial.size	1	1	D530049I02Rik	FALSE
OK	negbinomial.size	1	1	C530043A13Rik	FALSE
OK	negbinomial.size	1	1	Gm29186	FALSE
OK	negbinomial.size	1	1	6030407O03Rik	FALSE
OK	negbinomial.size	1	1	Gm29183	FALSE
OK	negbinomial.size	0.133917841602889	1	Tns1	FALSE
OK	negbinomial.size	0.592090604009722	1	Rufy4	FALSE
OK	negbinomial.size	0.00591279097409961	0.112949019525973	Cxcr2	FALSE
OK	negbinomial.size	0.363627643365086	1	Cxcr1	FALSE
OK	negbinomial.size	0.0669340734153657	0.679776125127077	Arpc2	TRUE
OK	negbinomial.size	1	1	Gpbar1	FALSE
OK	negbinomial.size	0.337861873053849	1	Aamp	TRUE
OK	negbinomial.size	1	1	Gm28364	FALSE
OK	negbinomial.size	0.44108436303651	1	Pnkd	FALSE
OK	negbinomial.size	0.0224851810159452	0.318555568456307	Tmbim1	TRUE
OK	negbinomial.size	0.297665900175735	1	Gm29358	FALSE
OK	negbinomial.size	0.19010175881327	1	Catip	FALSE
OK	negbinomial.size	1.3248780534992e-17	2.06380158623583e-15	Slc11a1	TRUE
OK	negbinomial.size	0.167067851631302	1	Ctdsp1	TRUE
OK	negbinomial.size	0.328276560282696	1	Vil1	FALSE
OK	negbinomial.size	0.75930764097927	1	Usp37	FALSE
OK	negbinomial.size	0.571014604456878	1	Cnot9	FALSE
OK	negbinomial.size	1	1	Plcd4	FALSE
OK	negbinomial.size	0.75102699393711	1	Zfp142	FALSE
OK	negbinomial.size	0.833488948684488	1	Bcs1l	FALSE
OK	negbinomial.size	0.234382644247183	1	Rnf25	FALSE
OK	negbinomial.size	1	1	Stk36	FALSE
OK	negbinomial.size	0.927874007438028	1	Ttll4	FALSE
OK	negbinomial.size	0.927033991036825	1	Cyp27a1	TRUE
OK	negbinomial.size	1	1	Prkag3	FALSE
OK	negbinomial.size	0.327076648199689	1	Wnt6	FALSE
OK	negbinomial.size	1	1	Gm29539	FALSE
OK	negbinomial.size	1	1	Wnt10a	FALSE
OK	negbinomial.size	1	1	Gm16582	FALSE
OK	negbinomial.size	1	1	Cdk5r2	FALSE
OK	negbinomial.size	1	1	Fev	FALSE
OK	negbinomial.size	1	1	Cryba2	FALSE
OK	negbinomial.size	1	1	Cfap65	FALSE
OK	negbinomial.size	1	1	Gm15841	FALSE
OK	negbinomial.size	0.516784597278809	1	Ihh	FALSE
OK	negbinomial.size	0.495316076615918	1	Nhej1	FALSE
OK	negbinomial.size	0.530734045527828	1	Slc23a3	FALSE
OK	negbinomial.size	0.0496689045521035	0.553029636492603	Cnppd1	TRUE
OK	negbinomial.size	0.513996972815585	1	Retreg2	TRUE
OK	negbinomial.size	0.420889942803854	1	Zfand2b	TRUE
OK	negbinomial.size	0.834914278025486	1	Abcb6	FALSE
OK	negbinomial.size	0.0837032329634644	0.780512072558389	Atg9a	TRUE
OK	negbinomial.size	0.0984979151574291	0.853551538363693	Ankzf1	FALSE
OK	negbinomial.size	0.59209060400979	1	Glb1l	FALSE
OK	negbinomial.size	0.596131020061796	1	Stk16	TRUE
OK	negbinomial.size	0.0404519606390845	0.482242332142636	Tuba4a	TRUE
OK	negbinomial.size	1	1	A630095N17Rik	FALSE
OK	negbinomial.size	0.101544876624484	0.868057939224941	Dnajb2	FALSE
OK	negbinomial.size	1	1	Ptprn	FALSE
OK	negbinomial.size	1	1	Gm28294	FALSE
OK	negbinomial.size	1	1	Resp18	FALSE
OK	negbinomial.size	1	1	Gm28902	FALSE
OK	negbinomial.size	0.217729842679227	1	Dnpep	FALSE
OK	negbinomial.size	1	1	Des	FALSE
OK	negbinomial.size	1	1	Gm15179	FALSE
OK	negbinomial.size	1	1	Speg	FALSE
OK	negbinomial.size	1	1	Gm15178	FALSE
OK	negbinomial.size	0.0612236575081081	0.642983815145604	Gmppa	FALSE
OK	negbinomial.size	1	1	Asic4	FALSE
OK	negbinomial.size	0.109387192135615	0.906965803654644	Chpf	FALSE
OK	negbinomial.size	1	1	Obsl1	FALSE
OK	negbinomial.size	1	1	Tmem198	FALSE
OK	negbinomial.size	1	1	Inha	FALSE
OK	negbinomial.size	0.191111472817435	1	Stk11ip	FALSE
OK	negbinomial.size	1	1	Slc4a3	FALSE
OK	negbinomial.size	1	1	Gm29065	FALSE
OK	negbinomial.size	1	1	Gm29069	FALSE
OK	negbinomial.size	1	1	Gm17751	FALSE
OK	negbinomial.size	1	1	Gm816	FALSE
OK	negbinomial.size	0.00368050857597358	0.0774155244828885	Epha4	FALSE
OK	negbinomial.size	1	1	Gm28386	FALSE
OK	negbinomial.size	1	1	Gm28387	FALSE
OK	negbinomial.size	1	1	Pax3	FALSE
OK	negbinomial.size	1	1	Sgpp2	FALSE
OK	negbinomial.size	1	1	Gm28410	FALSE
OK	negbinomial.size	0.0338942509191654	0.426255949176271	Farsb	FALSE
OK	negbinomial.size	1	1	BC035947	FALSE
OK	negbinomial.size	0.645485094849285	1	Mogat1	FALSE
OK	negbinomial.size	1	1	5730419F03Rik	FALSE
OK	negbinomial.size	1	1	Gm29611	FALSE
OK	negbinomial.size	0.626737457768222	1	Acsl3	FALSE
OK	negbinomial.size	0.662033447098972	1	Utp14b	FALSE
OK	negbinomial.size	1	1	Gm29536	FALSE
OK	negbinomial.size	1	1	Kcne4	FALSE
OK	negbinomial.size	1	1	Gm29187	FALSE
OK	negbinomial.size	1	1	Scg2	FALSE
OK	negbinomial.size	0.635350675793142	1	Ap1s3	FALSE
OK	negbinomial.size	0.274926868334758	1	Wdfy1	TRUE
OK	negbinomial.size	0.960476470698443	1	Mrpl44	FALSE
OK	negbinomial.size	1	1	Serpine2	FALSE
OK	negbinomial.size	1	1	9830004L10Rik	FALSE
OK	negbinomial.size	1	1	Fam124b	FALSE
OK	negbinomial.size	1	1	2310015K22Rik	FALSE
OK	negbinomial.size	0.104142457749503	0.880690676667382	Cul3	TRUE
OK	negbinomial.size	1	1	Gm29125	FALSE
OK	negbinomial.size	1	1	1700016L21Rik	FALSE
OK	negbinomial.size	1	1	Gm45261	FALSE
OK	negbinomial.size	0.000125607416197845	0.00427237461529483	Dock10	TRUE
OK	negbinomial.size	1	1	Nyap2	FALSE
OK	negbinomial.size	1	1	Irs1	FALSE
OK	negbinomial.size	1	1	Gm9747	FALSE
OK	negbinomial.size	0.629823994116488	1	Rhbdd1	FALSE
OK	negbinomial.size	1	1	Gm28940	FALSE
OK	negbinomial.size	0.645485094849292	1	Col4a4	FALSE
OK	negbinomial.size	1	1	Col4a3	FALSE
OK	negbinomial.size	0.675431880803119	1	C430014B12Rik	FALSE
OK	negbinomial.size	0.0997898622093196	0.860354039288639	Mff	TRUE
OK	negbinomial.size	1	1	Gm28941	FALSE
OK	negbinomial.size	1	1	Tm4sf20	FALSE
OK	negbinomial.size	1	1	Gm47791	FALSE
OK	negbinomial.size	1	1	Gm28942	FALSE
OK	negbinomial.size	0.00128559023737835	0.0326923164071491	Agfg1	TRUE
OK	negbinomial.size	0.695538913230306	1	A030005L19Rik	FALSE
OK	negbinomial.size	1	1	A030014E15Rik	FALSE
OK	negbinomial.size	1	1	Gm6217	FALSE
OK	negbinomial.size	1	1	A030003K21Rik	FALSE
OK	negbinomial.size	1	1	Gm7544	FALSE
OK	negbinomial.size	1	1	Gm47955	FALSE
OK	negbinomial.size	1	1	Gm47959	FALSE
OK	negbinomial.size	1	1	Slc19a3	FALSE
OK	negbinomial.size	1	1	Krtap28-10	FALSE
OK	negbinomial.size	1	1	Gm47969	FALSE
OK	negbinomial.size	1	1	A030005K14Rik	FALSE
OK	negbinomial.size	1	1	Krtap28-13	FALSE
OK	negbinomial.size	1	1	Ccl20	FALSE
OK	negbinomial.size	1	1	Daw1	FALSE
OK	negbinomial.size	1	1	Sphkap	FALSE
OK	negbinomial.size	1	1	4933436I20Rik	FALSE
OK	negbinomial.size	0.00472387448997512	0.0946683237596319	Pid1	TRUE
OK	negbinomial.size	1	1	Dner	FALSE
OK	negbinomial.size	0.256964047886671	1	Trip12	TRUE
OK	negbinomial.size	0.248946165230929	1	Fbxo36	FALSE
OK	negbinomial.size	1	1	Slc16a14	FALSE
OK	negbinomial.size	0.00264277403270536	0.0588916715166443	C130026I21Rik	FALSE
OK	negbinomial.size	0.93028577900202	1	A530032D15Rik	FALSE
OK	negbinomial.size	1	1	Gm10553	FALSE
OK	negbinomial.size	0.0980699096683036	0.850986070305288	A530040E14Rik	FALSE
OK	negbinomial.size	1	1	Gm16028	FALSE
OK	negbinomial.size	1	1	Gm16025	FALSE
OK	negbinomial.size	1	1	Gm16092	FALSE
OK	negbinomial.size	0.645485094849325	1	G530012D18Rik	FALSE
OK	negbinomial.size	0.0131233389398338	0.212324166640714	Sp110	TRUE
OK	negbinomial.size	1	1	Gm16094	FALSE
OK	negbinomial.size	0.028634277008437	0.376554756173349	Sp140	TRUE
OK	negbinomial.size	1	1	Gm10552	FALSE
OK	negbinomial.size	1	1	Gm17017	FALSE
OK	negbinomial.size	1.03674289045819e-05	0.00045114405536875	Sp100	TRUE
OK	negbinomial.size	0.0897624324524684	0.811207857183252	A630001G21Rik	TRUE
OK	negbinomial.size	1	1	9930111H07Rik	FALSE
OK	negbinomial.size	0.175096884663296	1	Cab39	TRUE
OK	negbinomial.size	0.214865413333676	1	Itm2c	TRUE
OK	negbinomial.size	1	1	4933407L21Rik	FALSE
OK	negbinomial.size	1	1	Gm28884	FALSE
OK	negbinomial.size	0.226277518543166	1	Gpr55	FALSE
OK	negbinomial.size	1	1	Gm28100	FALSE
OK	negbinomial.size	1	1	Spata3	FALSE
OK	negbinomial.size	1	1	2810459M11Rik	FALSE
OK	negbinomial.size	0.949933855787534	1	Psmd1	TRUE
OK	negbinomial.size	1	1	Htr2b	FALSE
OK	negbinomial.size	1	1	Armc9	FALSE
OK	negbinomial.size	1	1	Gm16341	FALSE
OK	negbinomial.size	0.607531493246126	1	B3gnt7	FALSE
OK	negbinomial.size	1	1	Gm28626	FALSE
OK	negbinomial.size	0.0443722768225835	0.513193710955597	Ncl	TRUE
OK	negbinomial.size	0.0618129290097769	0.646499479701672	C130036L24Rik	FALSE
OK	negbinomial.size	1	1	Nmur1	FALSE
OK	negbinomial.size	1	1	Tex44	FALSE
OK	negbinomial.size	1.80369323542068e-19	3.11016515380427e-17	Ptma	TRUE
OK	negbinomial.size	0.999090544266477	1	Pde6d	FALSE
OK	negbinomial.size	0.168181353951318	1	Cops7b	FALSE
OK	negbinomial.size	1	1	Nppc	FALSE
OK	negbinomial.size	0.388081301822599	1	Dis3l2	FALSE
OK	negbinomial.size	0.138196383365546	1	Gm29055	FALSE
OK	negbinomial.size	1	1	Gm28375	FALSE
OK	negbinomial.size	1	1	Gm29371	FALSE
OK	negbinomial.size	1	1	Alppl2	FALSE
OK	negbinomial.size	1	1	Alpi	FALSE
OK	negbinomial.size	1	1	Akp3	FALSE
OK	negbinomial.size	1	1	Gm29374	FALSE
OK	negbinomial.size	1	1	Ecel1	FALSE
OK	negbinomial.size	1	1	Prss56	FALSE
OK	negbinomial.size	1	1	Chrnd	FALSE
OK	negbinomial.size	1	1	Chrng	FALSE
OK	negbinomial.size	0.45715113148457	1	Eif4e2	TRUE
OK	negbinomial.size	0.155976190043623	1	Efhd1	FALSE
OK	negbinomial.size	1	1	Efhd1os	FALSE
OK	negbinomial.size	0.91745137803685	1	Gigyf2	TRUE
OK	negbinomial.size	1	1	Kcnj13	FALSE
OK	negbinomial.size	1	1	Snorc	FALSE
OK	negbinomial.size	1	1	Ngef	FALSE
OK	negbinomial.size	1	1	Neu2	FALSE
OK	negbinomial.size	0.279327200333224	1	Inpp5d	TRUE
OK	negbinomial.size	0.416877878010495	1	Atg16l1	FALSE
OK	negbinomial.size	0.127574151104072	0.983474744764853	Sag	FALSE
OK	negbinomial.size	0.0546758631078805	0.593610507041618	Dgkd	TRUE
OK	negbinomial.size	1	1	Gm19582	FALSE
OK	negbinomial.size	0.855482073590959	1	Usp40	FALSE
OK	negbinomial.size	1	1	Ugt1a10	FALSE
OK	negbinomial.size	1	1	Gm20528	FALSE
OK	negbinomial.size	1	1	Ugt1a9	FALSE
OK	negbinomial.size	1	1	Ugt1a8	FALSE
OK	negbinomial.size	0.0422749320314208	0.496561088600403	Ugt1a7c	FALSE
OK	negbinomial.size	1	1	Ugt1a6b	FALSE
OK	negbinomial.size	0.50764471592166	1	Ugt1a6a	FALSE
OK	negbinomial.size	0.188810612045743	1	Ugt1a5	FALSE
OK	negbinomial.size	0.645485094849293	1	Ugt1a2	FALSE
OK	negbinomial.size	1	1	Dnajb3	FALSE
OK	negbinomial.size	0.607531493246109	1	Ugt1a1	FALSE
OK	negbinomial.size	0.645485094849276	1	Mroh2a	FALSE
OK	negbinomial.size	0.745599979885218	1	Hjurp	FALSE
OK	negbinomial.size	1	1	Trpm8	FALSE
OK	negbinomial.size	1	1	4930453O03Rik	FALSE
OK	negbinomial.size	1	1	Spp2	FALSE
OK	negbinomial.size	1	1	Gm29538	FALSE
OK	negbinomial.size	1	1	Gm28888	FALSE
OK	negbinomial.size	1	1	Glrp1	FALSE
OK	negbinomial.size	1	1	Gm19589	FALSE
OK	negbinomial.size	0.1712505753883	1	Gm29336	FALSE
OK	negbinomial.size	3.73183799157448e-07	2.11547423778267e-05	Arl4c	TRUE
OK	negbinomial.size	1	1	Platr5	FALSE
OK	negbinomial.size	1	1	Gm29337	FALSE
OK	negbinomial.size	1	1	1700067G17Rik	FALSE
OK	negbinomial.size	0.608277758108552	1	Sh3bp4	FALSE
OK	negbinomial.size	1	1	Gm28342	FALSE
OK	negbinomial.size	1	1	C030007H22Rik	FALSE
OK	negbinomial.size	0.648519342457118	1	Agap1	FALSE
OK	negbinomial.size	0.447007227308112	1	Gm28499	FALSE
OK	negbinomial.size	1	1	4933400F21Rik	FALSE
OK	negbinomial.size	1	1	Gbx2	FALSE
OK	negbinomial.size	1	1	D130058E05Rik	FALSE
OK	negbinomial.size	1	1	Asb18	FALSE
OK	negbinomial.size	1	1	Iqca	FALSE
OK	negbinomial.size	1	1	4930434B07Rik	FALSE
OK	negbinomial.size	0.229863896440909	1	Ackr3	FALSE
OK	negbinomial.size	1	1	Gm28721	FALSE
OK	negbinomial.size	1	1	Gm28723	FALSE
OK	negbinomial.size	1	1	Gm28722	FALSE
OK	negbinomial.size	0.16651616814368	1	Cops8	TRUE
OK	negbinomial.size	1	1	Gm9991	FALSE
OK	negbinomial.size	0.991524349385065	1	Col6a3	FALSE
OK	negbinomial.size	1	1	Mlph	FALSE
OK	negbinomial.size	1	1	Prlh	FALSE
OK	negbinomial.size	1	1	Rab17	FALSE
OK	negbinomial.size	1	1	Gm28199	FALSE
OK	negbinomial.size	0.00337772564027743	0.0720812463737562	Lrrfip1	TRUE
OK	negbinomial.size	0.352848793480866	1	Rbm44	FALSE
OK	negbinomial.size	1.62614538224544e-09	1.20818105646323e-07	Ramp1	TRUE
OK	negbinomial.size	0.196808613678325	1	Ube2f	TRUE
OK	negbinomial.size	0.377387439262304	1	Scly	FALSE
OK	negbinomial.size	1	1	Gm17090	FALSE
OK	negbinomial.size	1	1	Espnl	FALSE
OK	negbinomial.size	1	1	Klhl30	FALSE
OK	negbinomial.size	1	1	Erfe	FALSE
OK	negbinomial.size	0.660609519569013	1	Ilkap	TRUE
OK	negbinomial.size	1	1	1700020N18Rik	FALSE
OK	negbinomial.size	0.624948260774226	1	Hes6	FALSE
OK	negbinomial.size	0.352848793480889	1	Per2	FALSE
OK	negbinomial.size	1	1	Gm28382	FALSE
OK	negbinomial.size	0.0313364905444617	0.403633890620193	Traf3ip1	FALSE
OK	negbinomial.size	0.862164641186372	1	Asb1	FALSE
OK	negbinomial.size	1	1	Gm28380	FALSE
OK	negbinomial.size	1	1	Gm29100	FALSE
OK	negbinomial.size	1	1	Twist2	FALSE
OK	negbinomial.size	1	1	Gm29101	FALSE
OK	negbinomial.size	0.0715680316324786	0.709192126610102	Hdac4	FALSE
OK	negbinomial.size	1	1	Gm29099	FALSE
OK	negbinomial.size	0.0633937586835585	0.655487888089801	Ndufa10	TRUE
OK	negbinomial.size	1	1	Olfr1416	FALSE
OK	negbinomial.size	1	1	Olfr1415	FALSE
OK	negbinomial.size	1	1	Olfr1414	FALSE
OK	negbinomial.size	1	1	Olfr1413	FALSE
OK	negbinomial.size	1	1	1700054K02Rik	FALSE
OK	negbinomial.size	1	1	Olfr1412	FALSE
OK	negbinomial.size	1	1	Olfr1411	FALSE
OK	negbinomial.size	1	1	Olfr1410	FALSE
OK	negbinomial.size	1	1	Olfr12	FALSE
OK	negbinomial.size	0.118008680709857	0.949635615046006	Cops9	TRUE
OK	negbinomial.size	0.380541878338205	1	Otos	FALSE
OK	negbinomial.size	1	1	Gm29483	FALSE
OK	negbinomial.size	1	1	Gm29482	FALSE
OK	negbinomial.size	1	1	Gm29481	FALSE
OK	negbinomial.size	0.240433793486134	1	Gpc1	FALSE
OK	negbinomial.size	1	1	Gm29480	FALSE
OK	negbinomial.size	0.645485094849291	1	Ankmy1	FALSE
OK	negbinomial.size	0.454863114374615	1	Dusp28	FALSE
OK	negbinomial.size	1	1	5033417F24Rik	FALSE
OK	negbinomial.size	0.35205079869047	1	Rnpepl1	TRUE
OK	negbinomial.size	0.444705733093589	1	9430060I03Rik	FALSE
OK	negbinomial.size	0.722305902563185	1	Capn10	FALSE
OK	negbinomial.size	5.36076521721924e-13	5.52261579646116e-11	Gpr35	TRUE
OK	negbinomial.size	0.64548509484929	1	Aqp12	FALSE
OK	negbinomial.size	1	1	Kif1a	FALSE
OK	negbinomial.size	1	1	Gm28086	FALSE
OK	negbinomial.size	1	1	Agxt	FALSE
OK	negbinomial.size	1	1	Mab21l4	FALSE
OK	negbinomial.size	1	1	Crocc2	FALSE
OK	negbinomial.size	0.940577318549389	1	Sned1	FALSE
OK	negbinomial.size	0.508386802819523	1	Mterf4	FALSE
OK	negbinomial.size	1	1	Gm28535	FALSE
OK	negbinomial.size	1	1	Pask	FALSE
OK	negbinomial.size	0.350248181369442	1	Ppp1r7	FALSE
OK	negbinomial.size	1	1	Ano7	FALSE
OK	negbinomial.size	0.116004251821115	0.939838467329612	Hdlbp	TRUE
OK	negbinomial.size	0.215534912457459	1	Sept2	FALSE
OK	negbinomial.size	0.13119059021797	1	Farp2	FALSE
OK	negbinomial.size	0.818118343679821	1	Stk25	FALSE
OK	negbinomial.size	1	1	Gm28536	FALSE
OK	negbinomial.size	1	1	Bok	FALSE
OK	negbinomial.size	0.141628403177179	1	Thap4	FALSE
OK	negbinomial.size	1	1	Gm10550	FALSE
OK	negbinomial.size	0.190584479540563	1	Atg4b	FALSE
OK	negbinomial.size	0.264321312100858	1	Dtymk	FALSE
OK	negbinomial.size	0.0809934524208694	0.763497090683176	Ing5	TRUE
OK	negbinomial.size	0.656258856676163	1	D2hgdh	FALSE
OK	negbinomial.size	1	1	Gal3st2	FALSE
OK	negbinomial.size	1	1	Gal3st2b	FALSE
OK	negbinomial.size	1	1	Gal3st2c	FALSE
OK	negbinomial.size	1	1	Neu4	FALSE
OK	negbinomial.size	0.516784597278788	1	Pdcd1	FALSE
OK	negbinomial.size	1	1	4930440C22Rik	FALSE
OK	negbinomial.size	0.167904079616636	1	Fam174a	TRUE
OK	negbinomial.size	0.155307673308084	1	St8sia4	TRUE
OK	negbinomial.size	1	1	4930598F16Rik	FALSE
OK	negbinomial.size	1	1	1700063A18Rik	FALSE
OK	negbinomial.size	1	1	Gm29601	FALSE
OK	negbinomial.size	1	1	4930533P14Rik	FALSE
OK	negbinomial.size	1	1	Slco4c1	FALSE
OK	negbinomial.size	1	1	Panct2	FALSE
OK	negbinomial.size	1	1	Gm28901	FALSE
OK	negbinomial.size	1	1	Slco6c1	FALSE
OK	negbinomial.size	0.000458683735807315	0.0134456882373699	D1Ertd622e	TRUE
OK	negbinomial.size	0.230899222436202	1	Ppip5k2	FALSE
OK	negbinomial.size	0.962596997699185	1	Gin1	FALSE
OK	negbinomial.size	0.622077310507751	1	Pam	FALSE
OK	negbinomial.size	0.751589731589203	1	B230216N24Rik	FALSE
OK	negbinomial.size	1	1	1810006J02Rik	FALSE
OK	negbinomial.size	1	1	Gm29461	FALSE
OK	negbinomial.size	1	1	Slco6d1	FALSE
OK	negbinomial.size	0.00990084405088061	0.170723377765051	Gm7967	FALSE
OK	negbinomial.size	1	1	Cntnap5b	FALSE
OK	negbinomial.size	1	1	Gm20268	FALSE
OK	negbinomial.size	0.665210952381145	1	Gm28187	FALSE
OK	negbinomial.size	1	1	Cdh20	FALSE
OK	negbinomial.size	1	1	Gm15699	FALSE
OK	negbinomial.size	1	1	Gm29012	FALSE
OK	negbinomial.size	1	1	Rnf152	FALSE
OK	negbinomial.size	1	1	Gm17634	FALSE
OK	negbinomial.size	0.171657242567786	1	Gm28403	FALSE
OK	negbinomial.size	0.792621914939775	1	Pign	FALSE
OK	negbinomial.size	0.328320483973788	1	Gm28404	FALSE
OK	negbinomial.size	0.878131163795058	1	Relch	TRUE
OK	negbinomial.size	0.970610043102277	1	Tnfrsf11a	FALSE
OK	negbinomial.size	0.681463222709001	1	Gm7160	FALSE
OK	negbinomial.size	0.691049547270221	1	Zcchc2	TRUE
OK	negbinomial.size	1	1	Gm20753	FALSE
OK	negbinomial.size	0.000588611842512954	0.0166635547513874	Phlpp1	TRUE
OK	negbinomial.size	1	1	A530053M12Rik	FALSE
OK	negbinomial.size	9.56501612206079e-16	1.25375587339776e-13	Bcl2	TRUE
OK	negbinomial.size	1	1	D630008O14Rik	FALSE
OK	negbinomial.size	0.0151368326277034	0.236043516705546	Kdsr	FALSE
OK	negbinomial.size	0.136955057027101	1	Vps4b	TRUE
OK	negbinomial.size	1	1	Serpinb5	FALSE
OK	negbinomial.size	1	1	Serpinb12	FALSE
OK	negbinomial.size	1	1	Serpinb13	FALSE
OK	negbinomial.size	1	1	Serpinb3a	FALSE
OK	negbinomial.size	1	1	Serpinb3d	FALSE
OK	negbinomial.size	1	1	Serpinb3b	FALSE
OK	negbinomial.size	1	1	Serpinb3c	FALSE
OK	negbinomial.size	1	1	Serpinb11	FALSE
OK	negbinomial.size	1	1	Gm15391	FALSE
OK	negbinomial.size	1	1	Serpinb7	FALSE
OK	negbinomial.size	0.0599435802733766	0.633108662271545	Serpinb2	TRUE
OK	negbinomial.size	1.70792951960391e-05	0.000702451369383013	Serpinb8	FALSE
OK	negbinomial.size	1	1	Gm15389	FALSE
OK	negbinomial.size	1	1	D830032E09Rik	FALSE
OK	negbinomial.size	1	1	Cdh7	FALSE
OK	negbinomial.size	1	1	Cdh19	FALSE
OK	negbinomial.size	1	1	Gm29088	FALSE
OK	negbinomial.size	0.661281827571586	1	Dsel	FALSE
OK	negbinomial.size	1	1	Gm28189	FALSE
OK	negbinomial.size	1	1	9330185C12Rik	FALSE
OK	negbinomial.size	1	1	Cntnap5a	FALSE
OK	negbinomial.size	1	1	Gm19965	FALSE
OK	negbinomial.size	1	1	Zfp813-ps	FALSE
OK	negbinomial.size	1	1	Gm28363	FALSE
OK	negbinomial.size	1	1	B020011L13Rik	FALSE
OK	negbinomial.size	1	1	Gm28360	FALSE
OK	negbinomial.size	1	1	Gm28168	FALSE
OK	negbinomial.size	1	1	Gm7145	FALSE
OK	negbinomial.size	1	1	Gm29106	FALSE
OK	negbinomial.size	0.736417465623502	1	Tsn	TRUE
OK	negbinomial.size	0.419853299451816	1	Nifk	FALSE
OK	negbinomial.size	1	1	Gm28867	FALSE
OK	negbinomial.size	0.0365087826053773	0.449378654130396	Clasp1	TRUE
OK	negbinomial.size	0.105396377620501	0.887570174033179	2900060B14Rik	FALSE
OK	negbinomial.size	1	1	Tfcp2l1	FALSE
OK	negbinomial.size	1	1	Gli2	FALSE
OK	negbinomial.size	1	1	Gm26831	FALSE
OK	negbinomial.size	1	1	Gm29456	FALSE
OK	negbinomial.size	1	1	Gm29455	FALSE
OK	negbinomial.size	1	1	Inhbb	FALSE
OK	negbinomial.size	0.0244203056630941	0.337808990178666	Ralb	TRUE
OK	negbinomial.size	0.645485094849321	1	Gm27184	FALSE
OK	negbinomial.size	0.715479604103237	1	Tmem185b	FALSE
OK	negbinomial.size	1	1	3830432H09Rik	FALSE
OK	negbinomial.size	0.127795291690636	0.983474744764853	Epb41l5	FALSE
OK	negbinomial.size	0.152342703889258	1	Ptpn4	FALSE
OK	negbinomial.size	1	1	Gm28209	FALSE
OK	negbinomial.size	1	1	Tmem177	FALSE
OK	negbinomial.size	1	1	Cfap221	FALSE
OK	negbinomial.size	1	1	Sctr	FALSE
OK	negbinomial.size	0.607531493246181	1	Tmem37	FALSE
OK	negbinomial.size	6.38034162826587e-13	6.53124177153755e-11	Dbi	TRUE
OK	negbinomial.size	0.442252980452998	1	3110009E18Rik	FALSE
OK	negbinomial.size	0.865848893138264	1	Steap3	FALSE
OK	negbinomial.size	1	1	C1ql2	FALSE
OK	negbinomial.size	1	1	1700012E03Rik	FALSE
OK	negbinomial.size	1	1	Marco	FALSE
OK	negbinomial.size	1	1	En1	FALSE
OK	negbinomial.size	1	1	2610027F03Rik	FALSE
OK	negbinomial.size	1	1	Gm29346	FALSE
OK	negbinomial.size	1	1	Gm29345	FALSE
OK	negbinomial.size	1	1	Gm29348	FALSE
OK	negbinomial.size	1	1	Gm29347	FALSE
OK	negbinomial.size	1	1	Celrr	FALSE
OK	negbinomial.size	1	1	Gm29359	FALSE
OK	negbinomial.size	0.34519894460609	1	Insig2	FALSE
OK	negbinomial.size	1	1	2210011K15Rik	FALSE
OK	negbinomial.size	0.256196493293455	1	Ccdc93	FALSE
OK	negbinomial.size	1	1	Gm15392	FALSE
OK	negbinomial.size	1	1	Htr5b	FALSE
OK	negbinomial.size	0.182167531761621	1	Ddx18	FALSE
OK	negbinomial.size	1	1	Gm28590	FALSE
OK	negbinomial.size	1	1	Dpp10	FALSE
OK	negbinomial.size	1	1	1700121L03Rik	FALSE
OK	negbinomial.size	0.386269015184352	1	Actr3	TRUE
OK	negbinomial.size	1	1	Gm28706	FALSE
OK	negbinomial.size	0.419898291789098	1	Slc35f5	FALSE
OK	negbinomial.size	1	1	Gpr39	FALSE
OK	negbinomial.size	0.342886782074049	1	Lypd1	FALSE
OK	negbinomial.size	1	1	Nckap5	FALSE
OK	negbinomial.size	1	1	4930599A14Rik	FALSE
OK	negbinomial.size	0.240075521549013	1	Mgat5	FALSE
OK	negbinomial.size	0.155976190043616	1	Tmem163	FALSE
OK	negbinomial.size	1	1	Acmsd	FALSE
OK	negbinomial.size	1	1	2900009J06Rik	FALSE
OK	negbinomial.size	0.870328809747283	1	Ccnt2	TRUE
OK	negbinomial.size	1	1	Map3k19	FALSE
OK	negbinomial.size	0.823395104293582	1	Rab3gap1	TRUE
OK	negbinomial.size	0.0398727114906118	0.478382417505856	Zranb3	FALSE
OK	negbinomial.size	0.328276560282696	1	Gm28800	FALSE
OK	negbinomial.size	0.0775758862112725	0.747589495183049	R3hdm1	TRUE
OK	negbinomial.size	0.175807119312515	1	Ubxn4	TRUE
OK	negbinomial.size	1	1	Lct	FALSE
OK	negbinomial.size	0.0909051330278463	0.817206498490226	Mcm6	FALSE
OK	negbinomial.size	0.764863016651923	1	Dars	FALSE
OK	negbinomial.size	1.34451446409729e-28	3.87088115132297e-26	Cxcr4	TRUE
OK	negbinomial.size	1	1	Gm26686	FALSE
OK	negbinomial.size	1	1	Thsd7b	FALSE
OK	negbinomial.size	1	1	Gm16081	FALSE
OK	negbinomial.size	1	1	Cd55b	FALSE
OK	negbinomial.size	1	1	Gm15674	FALSE
OK	negbinomial.size	1	1	Gm15675	FALSE
OK	negbinomial.size	0.0220601634416163	0.313499325771228	Cd55	FALSE
OK	negbinomial.size	1	1	Gm16083	FALSE
OK	negbinomial.size	1	1	Zp3r	FALSE
OK	negbinomial.size	1	1	C4bp	FALSE
OK	negbinomial.size	0.660003240914712	1	Pfkfb2	FALSE
OK	negbinomial.size	0.468962449017576	1	Yod1	FALSE
OK	negbinomial.size	1	1	AA986860	FALSE
OK	negbinomial.size	1	1	Gm28857	FALSE
OK	negbinomial.size	1	1	Gm28856	FALSE
OK	negbinomial.size	1	1	Fcamr	FALSE
OK	negbinomial.size	1	1	Gm15848	FALSE
OK	negbinomial.size	0.12779529169063	0.983474744764853	Pigr	FALSE
OK	negbinomial.size	0.522814861772301	1	Fcmr	FALSE
OK	negbinomial.size	1	1	Il24	FALSE
OK	negbinomial.size	1	1	Il20	FALSE
OK	negbinomial.size	1	1	Il19	FALSE
OK	negbinomial.size	0.637224676439197	1	Il10	FALSE
OK	negbinomial.size	0.00454992142403128	0.0918098975706437	Mapkapk2	TRUE
OK	negbinomial.size	0.0845895394541125	0.783606683273645	Dyrk3	FALSE
OK	negbinomial.size	0.0465675533483356	0.530028610039482	Eif2d	FALSE
OK	negbinomial.size	6.71019890780777e-10	5.29022894333158e-08	Rassf5	TRUE
OK	negbinomial.size	0.000221704362221902	0.00711329070631365	Ikbke	FALSE
OK	negbinomial.size	1	1	Gm28914	FALSE
OK	negbinomial.size	1	1	Gm28913	FALSE
OK	negbinomial.size	0.00802520535669143	0.144016450161466	Srgap2	TRUE
OK	negbinomial.size	0.209136406402336	1	Gm29488	FALSE
OK	negbinomial.size	0.689619196289279	1	Fam72a	FALSE
OK	negbinomial.size	1	1	Avpr1b	FALSE
OK	negbinomial.size	0.00169754835707308	0.0413112805840162	Ctse	TRUE
OK	negbinomial.size	0.000111762483996761	0.0038543115470327	Rab7b	TRUE
OK	negbinomial.size	1	1	Slc26a9	FALSE
OK	negbinomial.size	0.645485094849283	1	Pm20d1	FALSE
OK	negbinomial.size	0.141796684423026	1	Slc41a1	TRUE
OK	negbinomial.size	0.154809437319193	1	Rab29	FALSE
OK	negbinomial.size	0.25411274930299	1	Nucks1	TRUE
OK	negbinomial.size	1	1	Slc45a3	FALSE
OK	negbinomial.size	0.030030385142843	0.390928449306004	Elk4	TRUE
OK	negbinomial.size	0.657999445692554	1	Mfsd4a	FALSE
OK	negbinomial.size	1	1	Cdk18	FALSE
OK	negbinomial.size	1	1	Gm29629	FALSE
OK	negbinomial.size	1	1	Lemd1	FALSE
OK	negbinomial.size	1	1	Gm29695	FALSE
OK	negbinomial.size	1	1	Gm10188	FALSE
OK	negbinomial.size	1	1	Gm29630	FALSE
OK	negbinomial.size	1	1	Klhdc8a	FALSE
OK	negbinomial.size	5.88635094907487e-05	0.00213504371600584	Nuak2	TRUE
OK	negbinomial.size	1	1	F730311O21Rik	FALSE
OK	negbinomial.size	0.448432097610218	1	Tmcc2	FALSE
OK	negbinomial.size	1	1	Gm15849	FALSE
OK	negbinomial.size	0.928557494490495	1	Dstyk	TRUE
OK	negbinomial.size	1	1	6030442K20Rik	FALSE
OK	negbinomial.size	0.811758382329509	1	Rbbp5	FALSE
OK	negbinomial.size	0.799649385695622	1	Tmem81	FALSE
OK	negbinomial.size	1	1	Cntn2	FALSE
OK	negbinomial.size	1	1	Nfasc	FALSE
OK	negbinomial.size	1	1	Gm10538	FALSE
OK	negbinomial.size	1	1	Lrrn2	FALSE
OK	negbinomial.size	0.918861216930114	1	Mdm4	TRUE
OK	negbinomial.size	0.607531493246138	1	Pik3c2b	FALSE
OK	negbinomial.size	1	1	Gm28609	FALSE
OK	negbinomial.size	4.50798840310021e-05	0.00169813184647157	Ppp1r15b	TRUE
OK	negbinomial.size	0.00588021265819173	0.112393276326848	Plekha6	FALSE
OK	negbinomial.size	1	1	Gm19461	FALSE
OK	negbinomial.size	1	1	Gm28040	FALSE
OK	negbinomial.size	1	1	Kiss1	FALSE
OK	negbinomial.size	1	1	Ren1	FALSE
OK	negbinomial.size	1	1	Etnk2	FALSE
OK	negbinomial.size	0.610136099172133	1	Sox13	FALSE
OK	negbinomial.size	0.40774956490987	1	Snrpe	TRUE
OK	negbinomial.size	0.0516539331487322	0.570599888448396	Zc3h11a	FALSE
OK	negbinomial.size	0.706313479963642	1	Gm38394	FALSE
OK	negbinomial.size	1	1	Zbed6	FALSE
OK	negbinomial.size	0.592090604009799	1	Lax1	FALSE
OK	negbinomial.size	0.0256233308045105	0.349314749225034	Atp2b4	TRUE
OK	negbinomial.size	1	1	Gm28441	FALSE
OK	negbinomial.size	1	1	Optc	FALSE
OK	negbinomial.size	1	1	Gm15851	FALSE
OK	negbinomial.size	1	1	Prelp	FALSE
OK	negbinomial.size	1	1	Gm1627	FALSE
OK	negbinomial.size	1	1	Fmod	FALSE
OK	negbinomial.size	1.02324719792717e-07	6.28468683755458e-06	Btg2	TRUE
OK	negbinomial.size	1	1	Chit1	FALSE
OK	negbinomial.size	1.19567148031987e-22	2.50353421317624e-20	Chil1	TRUE
OK	negbinomial.size	0.699838664052635	1	Mybph	FALSE
OK	negbinomial.size	1	1	Adora1	FALSE
OK	negbinomial.size	1	1	Myog	FALSE
OK	negbinomial.size	0.00472080794597874	0.0946657041157241	Ppfia4	TRUE
OK	negbinomial.size	0.999221160074906	1	Tmem183a	TRUE
OK	negbinomial.size	1	1	4933406M09Rik	FALSE
OK	negbinomial.size	0.041644469112446	0.492238235531827	Cyb5r1	TRUE
OK	negbinomial.size	5.58057206054113e-06	0.000255241909350566	Adipor1	TRUE
OK	negbinomial.size	0.908355323829611	1	Platr1	FALSE
OK	negbinomial.size	0.00157429340166764	0.0387208930105058	Klhl12	FALSE
OK	negbinomial.size	0.395084713027852	1	Rabif	TRUE
OK	negbinomial.size	1	1	Mgat4e	FALSE
OK	negbinomial.size	0.00822478478216853	0.146767119701729	Kdm5b	TRUE
OK	negbinomial.size	1	1	Gm26783	FALSE
OK	negbinomial.size	1	1	Syt2	FALSE
OK	negbinomial.size	0.451170107118337	1	Ppp1r12b	FALSE
OK	negbinomial.size	1	1	Gm28892	FALSE
OK	negbinomial.size	0.675431880803121	1	Ube2t	FALSE
OK	negbinomial.size	1	1	Lgr6	FALSE
OK	negbinomial.size	1	1	Gm10535	FALSE
OK	negbinomial.size	0.553442471555502	1	Ptpn7	FALSE
OK	negbinomial.size	0.939859026088264	1	Arl8a	TRUE
OK	negbinomial.size	0.781652467582156	1	Gm15445	FALSE
OK	negbinomial.size	1	1	Gpr37l1	FALSE
OK	negbinomial.size	1	1	Gm26642	FALSE
OK	negbinomial.size	1	1	Elf3	FALSE
OK	negbinomial.size	5.14795723255303e-05	0.00189709578244197	Rnpep	TRUE
OK	negbinomial.size	0.649005873855578	1	Timm17a	TRUE
OK	negbinomial.size	1	1	Lmod1	FALSE
OK	negbinomial.size	1	1	Shisa4	FALSE
OK	negbinomial.size	0.258894869395257	1	Ipo9	FALSE
OK	negbinomial.size	0.645485094849296	1	Gm28277	FALSE
OK	negbinomial.size	0.215140504177431	1	Nav1	TRUE
OK	negbinomial.size	1	1	Gm4793	FALSE
OK	negbinomial.size	0.139562768013652	1	Csrp1	FALSE
OK	negbinomial.size	7.18428859409758e-05	0.00255692478715978	Phlda3	FALSE
OK	negbinomial.size	1	1	Tnni1	FALSE
OK	negbinomial.size	1	1	Lad1	FALSE
OK	negbinomial.size	1	1	Tnnt2	FALSE
OK	negbinomial.size	1	1	Pkp1	FALSE
OK	negbinomial.size	1	1	Igfn1	FALSE
OK	negbinomial.size	0.138587940195155	1	Tmem9	FALSE
OK	negbinomial.size	1	1	Ascl5	FALSE
OK	negbinomial.size	0.0473728938475028	0.535149919666133	Cacna1s	FALSE
OK	negbinomial.size	1	1	Gm37759	FALSE
OK	negbinomial.size	1	1	Gm15850	FALSE
OK	negbinomial.size	4.39588788603638e-06	0.000206325189061489	Kif21b	TRUE
OK	negbinomial.size	1	1	Mroh3	FALSE
OK	negbinomial.size	1	1	Inava	FALSE
OK	negbinomial.size	1	1	Gm26568	FALSE
OK	negbinomial.size	1	1	A430034D21Rik	FALSE
OK	negbinomial.size	1	1	Gm37552	FALSE
OK	negbinomial.size	1	1	Gm26781	FALSE
OK	negbinomial.size	1	1	Gpr25	FALSE
OK	negbinomial.size	0.555644978215652	1	Camsap2	FALSE
OK	negbinomial.size	0.237048235689196	1	9230116N13Rik	FALSE
OK	negbinomial.size	0.447007227308104	1	Ddx59	FALSE
OK	negbinomial.size	1	1	Kif14	FALSE
OK	negbinomial.size	1	1	Gm37799	FALSE
OK	negbinomial.size	1	1	Gm33994	FALSE
OK	negbinomial.size	1	1	4933409D19Rik	FALSE
OK	negbinomial.size	1	1	Platr23	FALSE
OK	negbinomial.size	0.331198028846965	1	Zfp281	TRUE
OK	negbinomial.size	0.262000955987254	1	Gm19705	FALSE
OK	negbinomial.size	1	1	Platr22	FALSE
OK	negbinomial.size	1	1	Nr5a2	FALSE
OK	negbinomial.size	0.329970092885754	1	Gm4258	FALSE
OK	negbinomial.size	1	1	Gm26979	FALSE
OK	negbinomial.size	1	1	Gm26936	FALSE
OK	negbinomial.size	0.101076148330322	0.86611756654564	Gm26930	FALSE
OK	negbinomial.size	0.467166126042467	1	A430106G13Rik	FALSE
OK	negbinomial.size	3.27535332503868e-28	9.10463516947174e-26	Ptprc	TRUE
OK	negbinomial.size	1	1	Gm28556	FALSE
OK	negbinomial.size	1	1	Atp6v1g3	FALSE
OK	negbinomial.size	0.217269862446251	1	Nek7	TRUE
OK	negbinomial.size	1	1	Gm28501	FALSE
OK	negbinomial.size	1	1	Gm5833	FALSE
OK	negbinomial.size	1	1	Lhx9	FALSE
OK	negbinomial.size	0.398103724227046	1	2310009B15Rik	TRUE
OK	negbinomial.size	1	1	1700019P21Rik	FALSE
OK	negbinomial.size	0.370696912607647	1	Dennd1b	TRUE
OK	negbinomial.size	1	1	4930596I21Rik	FALSE
OK	negbinomial.size	1	1	Crb1	FALSE
OK	negbinomial.size	1	1	4933436E23Rik	FALSE
OK	negbinomial.size	1	1	Gm34816	FALSE
OK	negbinomial.size	0.483251092128599	1	Zbtb41	FALSE
OK	negbinomial.size	1	1	Aspm	FALSE
OK	negbinomial.size	1	1	F13b	FALSE
OK	negbinomial.size	1	1	Cfhr1	FALSE
OK	negbinomial.size	1	1	Gm4788	FALSE
OK	negbinomial.size	1	1	Cfhr2	FALSE
OK	negbinomial.size	4.5397026674101e-08	2.87588826150567e-06	Cfh	TRUE
OK	negbinomial.size	1	1	Kcnt2	FALSE
OK	negbinomial.size	1	1	4930590L20Rik	FALSE
OK	negbinomial.size	0.631059006630833	1	Cdc73	TRUE
OK	negbinomial.size	0.467166126042495	1	B3galt2	FALSE
OK	negbinomial.size	0.49206447909027	1	Glrx2	TRUE
OK	negbinomial.size	0.339079143840361	1	Ro60	FALSE
OK	negbinomial.size	0.614436307297281	1	Uchl5	TRUE
OK	negbinomial.size	0.741621294277158	1	Gm29170	FALSE
OK	negbinomial.size	1.13797655026506e-10	9.65632996402551e-09	Rgs2	TRUE
OK	negbinomial.size	1	1	Rgs13	FALSE
OK	negbinomial.size	2.23131347289428e-13	2.35897386667135e-11	Rgs1	TRUE
OK	negbinomial.size	1	1	Rgs21	FALSE
OK	negbinomial.size	0.375386809188673	1	Rgs18	FALSE
OK	negbinomial.size	1	1	Gm29514	FALSE
OK	negbinomial.size	1	1	Brinp3	FALSE
OK	negbinomial.size	1	1	A230059L01Rik	FALSE
OK	negbinomial.size	1	1	Gm15584	FALSE
OK	negbinomial.size	1	1	Gm29515	FALSE
OK	negbinomial.size	1	1	Gm29020	FALSE
OK	negbinomial.size	1	1	Gm29398	FALSE
OK	negbinomial.size	0.34127178944996	1	Pla2g4a	FALSE
OK	negbinomial.size	0.751590996604485	1	Ptgs2os	FALSE
OK	negbinomial.size	3.78273689243254e-42	1.8765284784075e-39	Ptgs2	TRUE
OK	negbinomial.size	0.585253884332708	1	Ptgs2os2	FALSE
OK	negbinomial.size	1	1	Pdc	FALSE
OK	negbinomial.size	1	1	2310030A07Rik	FALSE
OK	negbinomial.size	0.456259376564183	1	Odr4	TRUE
OK	negbinomial.size	0.000128891874950969	0.00437026131208623	Tpr	TRUE
OK	negbinomial.size	1	1	Prg4	FALSE
OK	negbinomial.size	1	1	Hmcn1	FALSE
OK	negbinomial.size	1	1	Gm20631	FALSE
OK	negbinomial.size	1	1	Gm29188	FALSE
OK	negbinomial.size	1	1	C730036E19Rik	FALSE
OK	negbinomial.size	1	1	Gm47985	FALSE
OK	negbinomial.size	1	1	Gm8947	FALSE
OK	negbinomial.size	1	1	Gm47995	FALSE
OK	negbinomial.size	1	1	3110040M04Rik	FALSE
OK	negbinomial.size	1	1	Gm47996	FALSE
OK	negbinomial.size	0.353223377428838	1	Gm10138	FALSE
OK	negbinomial.size	0.00651946741212183	0.122363344996431	Ivns1abp	TRUE
OK	negbinomial.size	0.0752232163640553	0.732358880331812	Swt1	TRUE
OK	negbinomial.size	0.0160107269958265	0.24772835507698	Trmt1l	FALSE
OK	negbinomial.size	0.579103813466833	1	Rnf2	TRUE
OK	negbinomial.size	1	1	Gm28181	FALSE
OK	negbinomial.size	0.0564654258422654	0.608125469700684	Fam129a	TRUE
OK	negbinomial.size	1	1	2810414N06Rik	FALSE
OK	negbinomial.size	0.287255005417268	1	Edem3	FALSE
OK	negbinomial.size	2.66036327653075e-05	0.00104486496774341	1700025G04Rik	TRUE
OK	negbinomial.size	1	1	Gm28610	FALSE
OK	negbinomial.size	0.763231534261353	1	Tsen15	FALSE
OK	negbinomial.size	1	1	Colgalt2	FALSE
OK	negbinomial.size	0.121306186987567	0.963375515439486	Rgl1	FALSE
OK	negbinomial.size	1	1	Gm15479	FALSE
OK	negbinomial.size	1	1	Gm28792	FALSE
OK	negbinomial.size	1	1	Apobec4	FALSE
OK	negbinomial.size	0.0829780448769579	0.776444299784535	Arpc5	TRUE
OK	negbinomial.size	2.49141152448391e-11	2.21310095336043e-09	Ncf2	TRUE
OK	negbinomial.size	0.576384359900444	1	Smg7	TRUE
OK	negbinomial.size	0.252531619870642	1	Gm28791	FALSE
OK	negbinomial.size	1	1	Nmnat2	FALSE
OK	negbinomial.size	1	1	Gm28960	FALSE
OK	negbinomial.size	1	1	Lamc2	FALSE
OK	negbinomial.size	0.148496596380517	1	Lamc1	FALSE
OK	negbinomial.size	0.846536745346753	1	E330020D12Rik	FALSE
OK	negbinomial.size	1	1	Shcbp1l	FALSE
OK	negbinomial.size	0.00230214182000697	0.0527969864766178	Dhx9	TRUE
OK	negbinomial.size	0.0243890876900996	0.337521945307837	Npl	FALSE
OK	negbinomial.size	1	1	Rgs8	FALSE
OK	negbinomial.size	1	1	Gm29529	FALSE
OK	negbinomial.size	1	1	C230024C17Rik	FALSE
OK	negbinomial.size	1	1	Rgs16	FALSE
OK	negbinomial.size	1	1	Gm28513	FALSE
OK	negbinomial.size	7.78787970260769e-08	4.82923425020356e-06	Rnasel	TRUE
OK	negbinomial.size	1	1	Gm28512	FALSE
OK	negbinomial.size	1	1	Rgsl1	FALSE
OK	negbinomial.size	0.645485094849336	1	Teddm2	FALSE
OK	negbinomial.size	1	1	Teddm1b	FALSE
OK	negbinomial.size	1	1	Teddm1a	FALSE
OK	negbinomial.size	1.09374641296865e-05	0.000472452331267493	Glul	TRUE
OK	negbinomial.size	1	1	Gm29290	FALSE
OK	negbinomial.size	1	1	Gm29291	FALSE
OK	negbinomial.size	1	1	Gm28286	FALSE
OK	negbinomial.size	1	1	A830008E24Rik	FALSE
OK	negbinomial.size	1	1	Zfp648	FALSE
OK	negbinomial.size	1	1	4930452N14Rik	FALSE
OK	negbinomial.size	1	1	4930532M18Rik	FALSE
OK	negbinomial.size	0.592090604009778	1	Cacna1e	FALSE
OK	negbinomial.size	1	1	Gm29282	FALSE
OK	negbinomial.size	0.042044165153661	0.496053459707208	Gm9530	FALSE
OK	negbinomial.size	0.0207774538696894	0.299762416119971	Ier5	TRUE
OK	negbinomial.size	0.681811793189357	1	Mr1	FALSE
OK	negbinomial.size	0.0474944470137866	0.536037257248705	Stx6	TRUE
OK	negbinomial.size	1	1	BC034090	FALSE
OK	negbinomial.size	1	1	Gm37622	FALSE
OK	negbinomial.size	0.000468983081662802	0.0136606679929693	Xpr1	TRUE
OK	negbinomial.size	1	1	Gm5532	FALSE
OK	negbinomial.size	0.854493695283588	1	Acbd6	TRUE
OK	negbinomial.size	1	1	Lhx4	FALSE
OK	negbinomial.size	1.32365774378798e-05	0.000555746665995356	Qsox1	TRUE
OK	negbinomial.size	1	1	Gm37571	FALSE
OK	negbinomial.size	0.0724074532171128	0.71443645317803	Cep350	TRUE
OK	negbinomial.size	0.0112605025215676	0.18917063395452	Tor1aip1	TRUE
OK	negbinomial.size	0.920165456166094	1	Tor1aip2	TRUE
OK	negbinomial.size	1	1	Fam163a	FALSE
OK	negbinomial.size	1	1	Tdrd5	FALSE
OK	negbinomial.size	1	1	4930518J20Rik	FALSE
OK	negbinomial.size	1	1	Nphs2	FALSE
OK	negbinomial.size	0.908355323829608	1	Axdnd1	FALSE
OK	negbinomial.size	0.842204847352632	1	Gm2000	TRUE
OK	negbinomial.size	9.23377340734688e-05	0.00321536742462095	Soat1	TRUE
OK	negbinomial.size	0.0820705152961321	0.770440174819199	Abl2	TRUE
OK	negbinomial.size	0.769151150645043	1	Tor3a	FALSE
OK	negbinomial.size	0.000838746124924616	0.0225754330535845	Fam20b	TRUE
OK	negbinomial.size	0.506390126396304	1	Ralgps2	FALSE
OK	negbinomial.size	0.226277518543151	1	Angptl1	FALSE
OK	negbinomial.size	1	1	4930439D14Rik	FALSE
OK	negbinomial.size	1	1	Gm28694	FALSE
OK	negbinomial.size	1	1	Tex35	FALSE
OK	negbinomial.size	0.000751209123171085	0.0205277442175014	Rasal2	FALSE
OK	negbinomial.size	0.630933154762419	1	Cryzl2	FALSE
OK	negbinomial.size	1	1	Gm15486	FALSE
OK	negbinomial.size	1	1	Sec16b	FALSE
OK	negbinomial.size	1	1	Brinp2	FALSE
OK	negbinomial.size	1	1	Astn1	FALSE
OK	negbinomial.size	1	1	Gm37679	FALSE
OK	negbinomial.size	1	1	Pappa2	FALSE
OK	negbinomial.size	1	1	1600012P17Rik	FALSE
OK	negbinomial.size	1	1	4930562F17Rik	FALSE
OK	negbinomial.size	0.140629463042715	1	Cop1	TRUE
OK	negbinomial.size	0.516784597278817	1	Tnr	FALSE
OK	negbinomial.size	1	1	Gm10530	FALSE
OK	negbinomial.size	1	1	Gm38039	FALSE
OK	negbinomial.size	1	1	Gm37294	FALSE
OK	negbinomial.size	0.253593456248727	1	4930523C07Rik	TRUE
OK	negbinomial.size	1	1	4930562F07Rik	FALSE
OK	negbinomial.size	1	1	Tnn	FALSE
OK	negbinomial.size	0.480239995102236	1	Mrps14	TRUE
OK	negbinomial.size	0.420233575837532	1	Cacybp	TRUE
OK	negbinomial.size	0.00531197538510939	0.103871829164859	Rabgap1l	TRUE
OK	negbinomial.size	1	1	Gm36975	FALSE
OK	negbinomial.size	0.670148206245586	1	Gm37529	FALSE
OK	negbinomial.size	1	1	Gpr52	FALSE
OK	negbinomial.size	1	1	Gm37328	FALSE
OK	negbinomial.size	1	1	Gm37083	FALSE
OK	negbinomial.size	1	1	Gm38060	FALSE
OK	negbinomial.size	0.0156499496315473	0.242611839360213	Rc3h1	TRUE
OK	negbinomial.size	0.345374630072561	1	Serpinc1	FALSE
OK	negbinomial.size	0.519668252809149	1	Zbtb37	FALSE
OK	negbinomial.size	1	1	Gm37362	FALSE
OK	negbinomial.size	1.11113242639398e-16	1.61389482383216e-14	Gas5	TRUE
OK	negbinomial.size	0.0446393790619413	0.51498990732154	Dars2	FALSE
OK	negbinomial.size	1	1	Gm37634	FALSE
OK	negbinomial.size	0.0651571192719309	0.669318671845624	Cenpl	FALSE
OK	negbinomial.size	0.975015081226382	1	Klhl20	FALSE
OK	negbinomial.size	1	1	Ankrd45	FALSE
OK	negbinomial.size	1	1	Tex50	FALSE
OK	negbinomial.size	0.000168302292378074	0.00553766063033775	Prdx6	TRUE
OK	negbinomial.size	0.226277518543152	1	Tnfsf4	FALSE
OK	negbinomial.size	1	1	Tnfsf18	FALSE
OK	negbinomial.size	0.44700722730812	1	Fasl	FALSE
OK	negbinomial.size	0.127206455759241	0.983474744764853	Suco	TRUE
OK	negbinomial.size	1	1	Gm31925	FALSE
OK	negbinomial.size	1	1	4930558K02Rik	FALSE
OK	negbinomial.size	0.113370109783966	0.92383603487086	Pigc	FALSE
OK	negbinomial.size	1	1	Gm38304	FALSE
OK	negbinomial.size	0.363627652370761	1	Dnm3	FALSE
OK	negbinomial.size	1	1	2810442N19Rik	FALSE
OK	negbinomial.size	1	1	Dnm3os	FALSE
OK	negbinomial.size	0.000215486231066434	0.00693448455163389	Eef1aknmt	FALSE
OK	negbinomial.size	0.662309059351446	1	Vamp4	TRUE
OK	negbinomial.size	1	1	Myoc	FALSE
OK	negbinomial.size	1	1	Myocos	FALSE
OK	negbinomial.size	0.000375765365010034	0.011292221989514	Prrc2c	TRUE
OK	negbinomial.size	1	1	Fmo4	FALSE
OK	negbinomial.size	0.516784597278808	1	Fmo1	FALSE
OK	negbinomial.size	0.516784597278777	1	Fmo2	FALSE
OK	negbinomial.size	1	1	Fmo6	FALSE
OK	negbinomial.size	1	1	Fmo3	FALSE
OK	negbinomial.size	1	1	Gm37273	FALSE
OK	negbinomial.size	1	1	Mroh9	FALSE
OK	negbinomial.size	0.645485094849287	1	Prrx1	FALSE
OK	negbinomial.size	1	1	Gm20471	FALSE
OK	negbinomial.size	0.0366178367287535	0.450149502599565	Gorab	FALSE
OK	negbinomial.size	1	1	Gm29500	FALSE
OK	negbinomial.size	1	1	Mettl11b	FALSE
OK	negbinomial.size	0.909162855096084	1	Kifap3	FALSE
OK	negbinomial.size	0.174235364609772	1	Scyl3	FALSE
OK	negbinomial.size	0.516784597278815	1	BC055324	FALSE
OK	negbinomial.size	0.675431881401678	1	Mettl18	FALSE
OK	negbinomial.size	1	1	Sele	FALSE
OK	negbinomial.size	2.31788001181118e-53	1.69863729501935e-50	Sell	TRUE
OK	negbinomial.size	0.0421299467886606	0.496204086870632	Selp	FALSE
OK	negbinomial.size	0.846536745346732	1	Gm16587	FALSE
OK	negbinomial.size	0.0967415711925312	0.843773860725769	Gm16548	FALSE
OK	negbinomial.size	0.00023325273664867	0.00738099557726828	F5	TRUE
OK	negbinomial.size	0.551827677764891	1	Slc19a2	FALSE
OK	negbinomial.size	0.0482018715987474	0.540427451217527	Ccdc181	FALSE
OK	negbinomial.size	0.349365355890343	1	Blzf1	FALSE
OK	negbinomial.size	0.592965929113135	1	Nme7	FALSE
OK	negbinomial.size	0.0466180456067016	0.530041918402075	Atp1b1	FALSE
OK	negbinomial.size	1	1	Gm32391	FALSE
OK	negbinomial.size	1	1	Gm26685	FALSE
OK	negbinomial.size	1	1	Gm37754	FALSE
OK	negbinomial.size	1	1	Gm37853	FALSE
OK	negbinomial.size	1	1	Gm37184	FALSE
OK	negbinomial.size	1	1	Gm36945	FALSE
OK	negbinomial.size	1	1	Dpt	FALSE
OK	negbinomial.size	1	1	Gm32569	FALSE
OK	negbinomial.size	1	1	Gm20743	FALSE
OK	negbinomial.size	0.0192453827142143	0.285056208369242	Xcl1	FALSE
OK	negbinomial.size	1	1	1700029M03Rik	FALSE
OK	negbinomial.size	1	1	4930568G15Rik	FALSE
OK	negbinomial.size	1	1	Tbx19	FALSE
OK	negbinomial.size	0.832041133243036	1	Sft2d2	TRUE
OK	negbinomial.size	0.813898357762795	1	Tiprl	FALSE
OK	negbinomial.size	0.300238803342314	1	Gm38190	FALSE
OK	negbinomial.size	1	1	Gpr161	FALSE
OK	negbinomial.size	0.262906661419639	1	Dcaf6	FALSE
OK	negbinomial.size	1	1	Gm37864	FALSE
OK	negbinomial.size	0.478760347721697	1	Mpc2	TRUE
OK	negbinomial.size	1	1	Adcy10	FALSE
OK	negbinomial.size	1	1	Gm38325	FALSE
OK	negbinomial.size	1	1	Mpzl1	FALSE
OK	negbinomial.size	0.467305260631388	1	Rcsd1	TRUE
OK	negbinomial.size	1	1	Gm37073	FALSE
OK	negbinomial.size	0.700654666058749	1	Creg1	TRUE
OK	negbinomial.size	1	1	Gm36972	FALSE
OK	negbinomial.size	1	1	Gm16565	FALSE
OK	negbinomial.size	0.120384102311266	0.958465526533897	Cd247	FALSE
OK	negbinomial.size	1	1	Gm37469	FALSE
OK	negbinomial.size	0.00898506138806329	0.157887359377712	Pou2f1	FALSE
OK	negbinomial.size	1	1	Gm26665	FALSE
OK	negbinomial.size	1	1	Gm37923	FALSE
OK	negbinomial.size	1	1	Dusp27	FALSE
OK	negbinomial.size	1	1	Gpa33	FALSE
OK	negbinomial.size	1	1	Mael	FALSE
OK	negbinomial.size	1	1	Ildr2	FALSE
OK	negbinomial.size	1	1	5330438I03Rik	FALSE
OK	negbinomial.size	1	1	Gm15853	FALSE
OK	negbinomial.size	0.203315970840188	1	Tada1	FALSE
OK	negbinomial.size	0.0864069412805277	0.79333480113628	Pogk	FALSE
OK	negbinomial.size	1	1	Gm4846	FALSE
OK	negbinomial.size	1	1	Gm4847	FALSE
OK	negbinomial.size	1	1	Fmo9	FALSE
OK	negbinomial.size	1	1	Gm16701	FALSE
OK	negbinomial.size	0.295698493696229	1	Fam78b	FALSE
OK	negbinomial.size	2.1929589003268e-11	1.95878004822819e-09	Uck2	TRUE
OK	negbinomial.size	1	1	Gm37982	FALSE
OK	negbinomial.size	1	1	Gm2453	FALSE
OK	negbinomial.size	0.113426018185852	0.924058099141687	Tmco1	TRUE
OK	negbinomial.size	0.956028545090946	1	Aldh9a1	TRUE
OK	negbinomial.size	0.0040784635573331	0.0840319855630707	Mgst3	FALSE
OK	negbinomial.size	1	1	Lrrc52	FALSE
OK	negbinomial.size	1	1	Rxrg	FALSE
OK	negbinomial.size	1	1	Lmx1a	FALSE
OK	negbinomial.size	1	1	Gm20711	FALSE
OK	negbinomial.size	0.0043217166638927	0.0883663626044515	Pbx1	TRUE
OK	negbinomial.size	1	1	Gm37839	FALSE
OK	negbinomial.size	1	1	Nuf2	FALSE
OK	negbinomial.size	1	1	Rgs5	FALSE
OK	negbinomial.size	1	1	Rgs4	FALSE
OK	negbinomial.size	1	1	Ccdc190	FALSE
OK	negbinomial.size	1	1	Gm15852	FALSE
OK	negbinomial.size	0.643315655213207	1	Hsd17b7	FALSE
OK	negbinomial.size	1	1	3110045C21Rik	FALSE
OK	negbinomial.size	0.516784597278817	1	Ddr2	FALSE
OK	negbinomial.size	0.718923110399595	1	Uap1	FALSE
OK	negbinomial.size	1	1	Gm37748	FALSE
OK	negbinomial.size	1	1	Gm37502	FALSE
OK	negbinomial.size	0.360726808548846	1	Uhmk1	TRUE
OK	negbinomial.size	0.342886782074056	1	4930500M09Rik	FALSE
OK	negbinomial.size	1	1	Sh2d1b2	FALSE
OK	negbinomial.size	0.00298185025917772	0.0650099808026948	Sh2d1b1	FALSE
OK	negbinomial.size	0.102739900743764	0.874563912218308	Gm7694	FALSE
OK	negbinomial.size	0.736611099780505	1	Nos1ap	FALSE
OK	negbinomial.size	1	1	Spata46	FALSE
OK	negbinomial.size	1	1	Olfml2b	FALSE
OK	negbinomial.size	0.0353062150990229	0.438877758622973	Atf6	TRUE
OK	negbinomial.size	1	1	Gm9929	FALSE
OK	negbinomial.size	0.38335672757539	1	Dusp12	FALSE
OK	negbinomial.size	0.410996200209112	1	Gm26620	FALSE
OK	negbinomial.size	1	1	Fcrlb	FALSE
OK	negbinomial.size	0.345374630072577	1	Fcrla	FALSE
OK	negbinomial.size	6.36112512549995e-21	1.25069804677894e-18	Fcgr2b	TRUE
OK	negbinomial.size	1	1	Gm38204	FALSE
OK	negbinomial.size	0.516784597278812	1	Gm10522	FALSE
OK	negbinomial.size	1.2517115721164e-16	1.79384176190637e-14	Fcgr4	TRUE
OK	negbinomial.size	1.1873378891821e-18	1.95335256309575e-16	Fcgr3	TRUE
OK	negbinomial.size	1	1	Cfap126	FALSE
OK	negbinomial.size	0.0624180324629914	0.651128822681856	Sdhc	TRUE
OK	negbinomial.size	1	1	Mpz	FALSE
OK	negbinomial.size	0.645485094849323	1	Pcp4l1	FALSE
OK	negbinomial.size	1	1	Nr1i3	FALSE
OK	negbinomial.size	0.504450401338153	1	Tomm40l	FALSE
OK	negbinomial.size	1	1	Apoa2	FALSE
OK	negbinomial.size	1.8165003283714e-08	1.21520857029743e-06	Fcer1g	TRUE
OK	negbinomial.size	0.340059701125914	1	Ndufs2	TRUE
OK	negbinomial.size	1	1	Adamts4	FALSE
OK	negbinomial.size	0.656041236506925	1	B4galt3	FALSE
OK	negbinomial.size	0.098137432530829	0.851342887263003	Ppox	FALSE
OK	negbinomial.size	0.312599131558307	1	Usp21	FALSE
OK	negbinomial.size	0.012490517747242	0.204617719866451	Ufc1	TRUE
OK	negbinomial.size	0.529342722176042	1	Gm20045	FALSE
OK	negbinomial.size	0.767248993874742	1	Dedd	FALSE
OK	negbinomial.size	0.670344701800229	1	Nit1	FALSE
OK	negbinomial.size	0.735169145734258	1	Pfdn2	TRUE
OK	negbinomial.size	1	1	Klhdc9	FALSE
OK	negbinomial.size	0.517023187900411	1	Nectin4	FALSE
OK	negbinomial.size	0.00616561900061798	0.116688919610801	Arhgap30	TRUE
OK	negbinomial.size	0.0195455811144707	0.287652790066685	Usf1	TRUE
OK	negbinomial.size	0.645485094849289	1	Tstd1	FALSE
OK	negbinomial.size	0.00211234020236929	0.0491786352529947	F11r	FALSE
OK	negbinomial.size	0.115767425058968	0.938155471481886	B930036N10Rik	FALSE
OK	negbinomial.size	0.903870842776001	1	Alyref2	FALSE
OK	negbinomial.size	0.447007227308124	1	Itln1	FALSE
OK	negbinomial.size	4.26314036120294e-09	3.05477690993308e-07	Cd244a	TRUE
OK	negbinomial.size	0.182363640042303	1	Ly9	FALSE
OK	negbinomial.size	3.13708467443669e-08	2.02310590654422e-06	Slamf7	FALSE
OK	negbinomial.size	0.171657242567781	1	Gm37787	FALSE
OK	negbinomial.size	0.109980304473208	0.908803157299423	A630035G10Rik	FALSE
OK	negbinomial.size	0.0143201673227788	0.226238998198434	Cd48	TRUE
OK	negbinomial.size	0.024077542253633	0.334070718575041	Slamf1	FALSE
OK	negbinomial.size	6.32773802638083e-06	0.000285767384678781	Cd84	TRUE
OK	negbinomial.size	0.645485094849286	1	Gm10521	FALSE
OK	negbinomial.size	1	1	Gm37065	FALSE
OK	negbinomial.size	0.411945163095673	1	Slamf6	FALSE
OK	negbinomial.size	0.157192922710596	1	Vangl2	FALSE
OK	negbinomial.size	1	1	Nhlh1	FALSE
OK	negbinomial.size	0.0460348480052067	0.525263154256154	Ncstn	TRUE
OK	negbinomial.size	0.0313443715959983	0.403633890620193	Copa	TRUE
OK	negbinomial.size	1	1	Gm37756	FALSE
OK	negbinomial.size	0.106883838874318	0.894964833463229	Pex19	FALSE
OK	negbinomial.size	0.502962471689211	1	Dcaf8	TRUE
OK	negbinomial.size	0.829602265073368	1	Pea15a	TRUE
OK	negbinomial.size	1	1	Casq1	FALSE
OK	negbinomial.size	1	1	Gm17224	FALSE
OK	negbinomial.size	1	1	Atp1a4	FALSE
OK	negbinomial.size	1	1	Gm37950	FALSE
OK	negbinomial.size	0.00839852535905544	0.149346328250177	Igsf8	TRUE
OK	negbinomial.size	1	1	Atp1a2	FALSE
OK	negbinomial.size	1	1	Kcnj9	FALSE
OK	negbinomial.size	1	1	Gm36937	FALSE
OK	negbinomial.size	1	1	Kcnj10	FALSE
OK	negbinomial.size	0.255981332753565	1	Pigm	FALSE
OK	negbinomial.size	5.95232829234572e-06	0.000270327923643222	Slamf9	FALSE
OK	negbinomial.size	0.528204400404314	1	Igsf9	FALSE
OK	negbinomial.size	4.81270534001077e-42	2.35129823770678e-39	Tagln2	TRUE
OK	negbinomial.size	0.188922740482823	1	Cfap45	FALSE
OK	negbinomial.size	1	1	4933439K11Rik	FALSE
OK	negbinomial.size	1	1	Vsig8	FALSE
OK	negbinomial.size	0.516784597278817	1	Slamf8	FALSE
OK	negbinomial.size	1	1	Fcrl6	FALSE
OK	negbinomial.size	0.583725045813824	1	Dusp23	FALSE
OK	negbinomial.size	1	1	Crp	FALSE
OK	negbinomial.size	1	1	Apcs	FALSE
OK	negbinomial.size	1	1	Olfr16	FALSE
OK	negbinomial.size	1	1	Olfr1408	FALSE
OK	negbinomial.size	1	1	Olfr1406	FALSE
OK	negbinomial.size	1	1	Olfr218	FALSE
OK	negbinomial.size	1	1	Olfr1404	FALSE
OK	negbinomial.size	1	1	Fcer1a	FALSE
OK	negbinomial.size	1	1	Olfr418	FALSE
OK	negbinomial.size	1	1	Mptx2	FALSE
OK	negbinomial.size	0.467166126042479	1	Ackr1	FALSE
OK	negbinomial.size	0.0326936200651209	0.415205111854991	Cadm3	FALSE
OK	negbinomial.size	0.00510992436552264	0.100530513219205	Aim2	TRUE
OK	negbinomial.size	1	1	Ifi206	FALSE
OK	negbinomial.size	0.135197191955965	1	Ifi214	FALSE
OK	negbinomial.size	0.645485094849321	1	Ifi213	FALSE
OK	negbinomial.size	0.000736838167000313	0.0202035261011268	Ifi209	TRUE
OK	negbinomial.size	0.689619196289296	1	Ifi208	FALSE
OK	negbinomial.size	4.67298607808415e-06	0.000217118783988218	Ifi207	TRUE
OK	negbinomial.size	1.61232005491386e-09	1.20067575451957e-07	Ifi204	TRUE
OK	negbinomial.size	0.424411828831973	1	Mndal	FALSE
OK	negbinomial.size	0.00620114075761509	0.117276119489325	Ifi211	FALSE
OK	negbinomial.size	0.0138168130340168	0.22033785177145	Ifi203	TRUE
OK	negbinomial.size	6.80069276185864e-06	0.000304567136258517	Ifi202b	TRUE
OK	negbinomial.size	0.409805858883333	1	Ifi205	FALSE
OK	negbinomial.size	0.027022516905823	0.361297282306809	Olfr433	FALSE
OK	negbinomial.size	1	1	Olfr432	FALSE
OK	negbinomial.size	0.645485094849289	1	Olfr430	FALSE
OK	negbinomial.size	1	1	Olfr429	FALSE
OK	negbinomial.size	1	1	Olfr427	FALSE
OK	negbinomial.size	1	1	Olfr231	FALSE
OK	negbinomial.size	1	1	Olfr424	FALSE
OK	negbinomial.size	1	1	Olfr420	FALSE
OK	negbinomial.size	1	1	Spta1	FALSE
OK	negbinomial.size	1	1	Olfr419	FALSE
OK	negbinomial.size	1	1	Mptx1	FALSE
OK	negbinomial.size	1	1	Olfr417	FALSE
OK	negbinomial.size	1	1	Olfr248	FALSE
OK	negbinomial.size	1	1	Olfr414	FALSE
OK	negbinomial.size	1	1	Olfr220	FALSE
OK	negbinomial.size	1	1	Fmn2	FALSE
OK	negbinomial.size	1	1	Grem2	FALSE
OK	negbinomial.size	1	1	Rgs7	FALSE
OK	negbinomial.size	1	1	Gm36307	FALSE
OK	negbinomial.size	0.196898170561036	1	Fh1	FALSE
OK	negbinomial.size	6.19463083286056e-05	0.00223429386136005	Kmo	FALSE
OK	negbinomial.size	0.675431880803092	1	Opn3	FALSE
OK	negbinomial.size	0.531225247557237	1	Chml	FALSE
OK	negbinomial.size	1	1	Wdr64	FALSE
OK	negbinomial.size	1	1	Exo1	FALSE
OK	negbinomial.size	1	1	Gm38100	FALSE
OK	negbinomial.size	1	1	Pld5	FALSE
OK	negbinomial.size	1	1	Rbm8a2	FALSE
OK	negbinomial.size	1	1	Gm38101	FALSE
OK	negbinomial.size	1	1	Gm36536	FALSE
OK	negbinomial.size	0.592623237623522	1	Cep170	TRUE
OK	negbinomial.size	1	1	Gm36992	FALSE
OK	negbinomial.size	0.540053628231045	1	Sdccag8	FALSE
OK	negbinomial.size	1	1	Gm15423	FALSE
OK	negbinomial.size	0.0909339956698067	0.817206498490226	Akt3	FALSE
OK	negbinomial.size	0.301807018946954	1	Gm26801	FALSE
OK	negbinomial.size	0.291931392844211	1	Zbtb18	FALSE
OK	negbinomial.size	1	1	Gm29856	FALSE
OK	negbinomial.size	1	1	Gm37306	FALSE
OK	negbinomial.size	1	1	Gm37280	FALSE
OK	negbinomial.size	1	1	2310043L19Rik	FALSE
OK	negbinomial.size	1	1	1700016C15Rik	FALSE
OK	negbinomial.size	0.215686266332171	1	Adss	TRUE
OK	negbinomial.size	1	1	Catspere1	FALSE
OK	negbinomial.size	1	1	Catspere2	FALSE
OK	negbinomial.size	0.784461580867153	1	Desi2	TRUE
OK	negbinomial.size	1	1	4930527J03Rik	FALSE
OK	negbinomial.size	1	1	B230369F24Rik	FALSE
OK	negbinomial.size	0.0611308160605194	0.642491252891606	Cox20	TRUE
OK	negbinomial.size	0.168322912226706	1	Hnrnpu	TRUE
OK	negbinomial.size	0.670148287540898	1	Efcab2	FALSE
OK	negbinomial.size	1	1	Kif26b	FALSE
OK	negbinomial.size	1	1	Gm16564	FALSE
OK	negbinomial.size	0.316326663186156	1	Smyd3	FALSE
OK	negbinomial.size	0.761208684806435	1	Tfb2m	FALSE
OK	negbinomial.size	0.00381611842037241	0.0796960741353034	Cnst	FALSE
OK	negbinomial.size	0.592090604009772	1	Sccpdh	FALSE
OK	negbinomial.size	1	1	Kif28	FALSE
OK	negbinomial.size	0.637003721805134	1	Ahctf1	FALSE
OK	negbinomial.size	1	1	Gm10518	FALSE
OK	negbinomial.size	1	1	Cdc42bpa	FALSE
OK	negbinomial.size	0.58555890577052	1	Coq8a	FALSE
OK	negbinomial.size	0.516784597278814	1	Gm37336	FALSE
OK	negbinomial.size	0.435501824308513	1	Psen2	TRUE
OK	negbinomial.size	1	1	Gm31728	FALSE
OK	negbinomial.size	6.52624641356616e-06	0.000294320021825792	Itpkb	TRUE
OK	negbinomial.size	1	1	Stum	FALSE
OK	negbinomial.size	1	1	Gm37267	FALSE
OK	negbinomial.size	0.0755051474469811	0.734147154511567	Parp1	TRUE
OK	negbinomial.size	0.0318621465868576	0.407751190624143	Lin9	FALSE
OK	negbinomial.size	1	1	Mixl1	FALSE
OK	negbinomial.size	0.202637789964856	1	Acbd3	TRUE
OK	negbinomial.size	0.516784597278796	1	Gm37768	FALSE
OK	negbinomial.size	1	1	Gm38293	FALSE
OK	negbinomial.size	0.959953878951679	1	H3f3a	TRUE
OK	negbinomial.size	0.380541869574314	1	H3f3aos	FALSE
OK	negbinomial.size	0.0342136555462306	0.428831226350492	Sde2	TRUE
OK	negbinomial.size	1	1	Lefty2	FALSE
OK	negbinomial.size	0.131895044897068	1	Pycr2	FALSE
OK	negbinomial.size	0.127795291690628	0.983474744764853	Lefty1	FALSE
OK	negbinomial.size	0.0794193744892877	0.758521543780331	Tmem63a	FALSE
OK	negbinomial.size	1	1	2210411M09Rik	FALSE
OK	negbinomial.size	1	1	Ephx1	FALSE
OK	negbinomial.size	1	1	9130409I23Rik	FALSE
OK	negbinomial.size	1	1	Gm37406	FALSE
OK	negbinomial.size	0.538970706601172	1	Nvl	FALSE
OK	negbinomial.size	0.947705564305087	1	Cnih4	TRUE
OK	negbinomial.size	0.465142386405308	1	Wdr26	TRUE
OK	negbinomial.size	0.645485094849315	1	A430110L20Rik	FALSE
OK	negbinomial.size	1	1	Cnih3	FALSE
OK	negbinomial.size	1	1	Ccdc121	FALSE
OK	negbinomial.size	1	1	Dnah14	FALSE
OK	negbinomial.size	0.0261376501935296	0.353675421943081	Lbr	TRUE
OK	negbinomial.size	1	1	Gm5533	FALSE
OK	negbinomial.size	0.330025296088479	1	Enah	FALSE
OK	negbinomial.size	0.410705103847367	1	Srp9	TRUE
OK	negbinomial.size	1	1	Vmn1r1	FALSE
OK	negbinomial.size	0.000757525874238414	0.0206304238300825	Degs1	TRUE
OK	negbinomial.size	0.741096259229256	1	1700047M11Rik	FALSE
OK	negbinomial.size	0.0498454812467766	0.554612678675746	Fbxo28	TRUE
OK	negbinomial.size	0.726318435502202	1	Trp53bp2	TRUE
OK	negbinomial.size	0.00130850028185149	0.0332225130616547	Capn2	TRUE
OK	negbinomial.size	1	1	Gm37885	FALSE
OK	negbinomial.size	1	1	Capn8	FALSE
OK	negbinomial.size	1	1	Gm37218	FALSE
OK	negbinomial.size	1	1	Ccdc185	FALSE
OK	negbinomial.size	1	1	Susd4	FALSE
OK	negbinomial.size	0.15677208409242	1	Tlr5	FALSE
OK	negbinomial.size	0.645485094849313	1	Gm38079	FALSE
OK	negbinomial.size	0.55617688745757	1	Disp1	FALSE
OK	negbinomial.size	0.232374455569603	1	Brox	TRUE
OK	negbinomial.size	0.136890146352607	1	Aida	TRUE
OK	negbinomial.size	0.306730165778448	1	Mia3	TRUE
OK	negbinomial.size	0.0614309017491737	0.64459467194992	Taf1a	FALSE
OK	negbinomial.size	0.482906824246173	1	Gm37986	FALSE
OK	negbinomial.size	1	1	Hhipl2	FALSE
OK	negbinomial.size	0.607531493246142	1	Gm37214	FALSE
OK	negbinomial.size	0.6754318808031	1	Gm33973	FALSE
OK	negbinomial.size	1	1	Gm34068	FALSE
OK	negbinomial.size	1	1	Gm38108	FALSE
OK	negbinomial.size	0.126823266069944	0.983474744764853	Dusp10	FALSE
OK	negbinomial.size	0.483279191062021	1	1700056E22Rik	FALSE
OK	negbinomial.size	1	1	Gm37223	FALSE
OK	negbinomial.size	1	1	Gm37712	FALSE
OK	negbinomial.size	1	1	1700112H15Rik	FALSE
OK	negbinomial.size	0.380541869574738	1	Gm37800	FALSE
OK	negbinomial.size	1	1	4930488B22Rik	FALSE
OK	negbinomial.size	0.00691397582524126	0.128274539979807	Hlx	TRUE
OK	negbinomial.size	0.840765213802474	1	Gm34342	FALSE
OK	negbinomial.size	1	1	Marc1	FALSE
OK	negbinomial.size	0.832294763263556	1	Marc2	TRUE
OK	negbinomial.size	1	1	C130074G19Rik	FALSE
OK	negbinomial.size	1	1	Mark1	FALSE
OK	negbinomial.size	1	1	Gm38251	FALSE
OK	negbinomial.size	1	1	Gm34732	FALSE
OK	negbinomial.size	1	1	4930433J02Rik	FALSE
OK	negbinomial.size	1	1	Gm37662	FALSE
OK	negbinomial.size	0.639632832738501	1	Rab3gap2	FALSE
OK	negbinomial.size	1	1	Gm34882	FALSE
OK	negbinomial.size	0.921627488828865	1	Iars2	FALSE
OK	negbinomial.size	1	1	2010103J01Rik	FALSE
OK	negbinomial.size	0.347264057504045	1	Bpnt1	FALSE
OK	negbinomial.size	0.512559522412129	1	4930532G15Rik	FALSE
OK	negbinomial.size	0.0957470942943397	0.838729979766635	Eprs	TRUE
OK	negbinomial.size	1	1	9630028B13Rik	FALSE
OK	negbinomial.size	1	1	Gm2061	FALSE
OK	negbinomial.size	1	1	Slc30a10	FALSE
OK	negbinomial.size	1	1	Gm38093	FALSE
OK	negbinomial.size	0.63663718658312	1	Lyplal1	FALSE
OK	negbinomial.size	1	1	Gm37134	FALSE
OK	negbinomial.size	1	1	A730004F24Rik	FALSE
OK	negbinomial.size	0.645485094849283	1	Tgfb2	FALSE
OK	negbinomial.size	1	1	Gm29491	FALSE
OK	negbinomial.size	0.362703981642129	1	Rrp15	FALSE
OK	negbinomial.size	1	1	A430105J06Rik	FALSE
OK	negbinomial.size	1	1	1700023G09Rik	FALSE
OK	negbinomial.size	1	1	Gm37912	FALSE
OK	negbinomial.size	1	1	D1Pas1	FALSE
OK	negbinomial.size	1	1	Spata17	FALSE
OK	negbinomial.size	1	1	Gm15509	FALSE
OK	negbinomial.size	1	1	1700007P06Rik	FALSE
OK	negbinomial.size	0.307946103640405	1	Gpatch2	FALSE
OK	negbinomial.size	1	1	Gm38155	FALSE
OK	negbinomial.size	1	1	Gm37896	FALSE
OK	negbinomial.size	1	1	Esrrg	FALSE
OK	negbinomial.size	1	1	Gm36388	FALSE
OK	negbinomial.size	1	1	9330162B11Rik	FALSE
OK	negbinomial.size	1	1	Gm38064	FALSE
OK	negbinomial.size	1	1	Ush2a	FALSE
OK	negbinomial.size	0.788974739150302	1	Kctd3	FALSE
OK	negbinomial.size	1	1	Kcnk2	FALSE
OK	negbinomial.size	1	1	2900042K21Rik	FALSE
OK	negbinomial.size	1	1	A430027H14Rik	FALSE
OK	negbinomial.size	1	1	Cenpf	FALSE
OK	negbinomial.size	1	1	Ptpn14	FALSE
OK	negbinomial.size	1	1	Gm26574	FALSE
OK	negbinomial.size	1	1	Gm37422	FALSE
OK	negbinomial.size	0.0876175233054812	0.797861349614584	Smyd2	FALSE
OK	negbinomial.size	1	1	Prox1	FALSE
OK	negbinomial.size	1	1	Gm28172	FALSE
OK	negbinomial.size	1	1	Prox1os	FALSE
OK	negbinomial.size	1	1	Gm29678	FALSE
OK	negbinomial.size	1	1	Gm30725	FALSE
OK	negbinomial.size	1	1	Gm30932	FALSE
OK	negbinomial.size	0.724931705314425	1	Rps6kc1	FALSE
OK	negbinomial.size	0.30727924160039	1	Angel2	TRUE
OK	negbinomial.size	1	1	Vash2	FALSE
OK	negbinomial.size	1	1	Gm31373	FALSE
OK	negbinomial.size	0.062651623407641	0.652468607572921	Flvcr1	TRUE
OK	negbinomial.size	1	1	A230020J21Rik	FALSE
OK	negbinomial.size	1	1	Spata45	FALSE
OK	negbinomial.size	0.665498693914673	1	Tatdn3	FALSE
OK	negbinomial.size	0.608277928604008	1	Nsl1	FALSE
OK	negbinomial.size	1	1	Gm38188	FALSE
OK	negbinomial.size	0.00155377627498216	0.0384214079653372	Batf3	TRUE
OK	negbinomial.size	1	1	Gm38161	FALSE
OK	negbinomial.size	0.355177033207035	1	Fam71a	FALSE
OK	negbinomial.size	0.000664912813006857	0.0186112097703178	Atf3	TRUE
OK	negbinomial.size	0.230756844151976	1	D730003I15Rik	FALSE
OK	negbinomial.size	0.0569648449566733	0.611293269071624	Gm37168	FALSE
OK	negbinomial.size	0.77071177976517	1	Nenf	FALSE
OK	negbinomial.size	0.222141158420249	1	Pacc1	FALSE
OK	negbinomial.size	2.03675843102515e-05	0.00081991605004252	Ppp2r5a	TRUE
OK	negbinomial.size	1	1	Gm32200	FALSE
OK	negbinomial.size	1	1	Gm37432	FALSE
OK	negbinomial.size	0.300794508882038	1	Dtl	FALSE
OK	negbinomial.size	0.428785294590885	1	Ints7	FALSE
OK	negbinomial.size	0.00466325750231089	0.0937448492281886	Lpgat1	TRUE
OK	negbinomial.size	1	1	Gm38037	FALSE
OK	negbinomial.size	0.645485094849274	1	Nek2	FALSE
OK	negbinomial.size	0.645485094849294	1	1700034H15Rik	FALSE
OK	negbinomial.size	0.752601499272228	1	Slc30a1	FALSE
OK	negbinomial.size	1	1	Rd3	FALSE
OK	negbinomial.size	0.908355323829618	1	Gm26670	FALSE
OK	negbinomial.size	0.608617269200681	1	Traf5	FALSE
OK	negbinomial.size	1	1	Gm26879	FALSE
OK	negbinomial.size	0.518320903176035	1	Rcor3	FALSE
OK	negbinomial.size	1	1	Gm10516	FALSE
OK	negbinomial.size	1	1	Kcnh1	FALSE
OK	negbinomial.size	1	1	Hhat	FALSE
OK	negbinomial.size	1	1	1700065J18Rik	FALSE
OK	negbinomial.size	1	1	Sertad4	FALSE
OK	negbinomial.size	1	1	Gm15867	FALSE
OK	negbinomial.size	1	1	Syt14	FALSE
OK	negbinomial.size	1	1	Gm31406	FALSE
OK	negbinomial.size	0.297665900175732	1	Utp25	FALSE
OK	negbinomial.size	1	1	Irf6	FALSE
OK	negbinomial.size	0.292749480096595	1	A130010J15Rik	FALSE
OK	negbinomial.size	0.0813926167955074	0.766278811261646	Traf3ip3	TRUE
OK	negbinomial.size	1	1	Gm15872	FALSE
OK	negbinomial.size	1	1	4930570N18Rik	FALSE
OK	negbinomial.size	0.154704426405613	1	Lamb3	FALSE
OK	negbinomial.size	5.15201442913431e-08	3.23833733464787e-06	Hsd11b1	TRUE
OK	negbinomial.size	3.02519268388329e-16	4.18658103398355e-14	G0s2	TRUE
OK	negbinomial.size	1	1	Gm37650	FALSE
OK	negbinomial.size	1	1	Camk1g	FALSE
OK	negbinomial.size	1	1	Mir205hg	FALSE
OK	negbinomial.size	1	1	4930503O07Rik	FALSE
OK	negbinomial.size	1	1	Plxna2	FALSE
OK	negbinomial.size	0.118685856359702	0.952101374456868	Cd34	FALSE
OK	negbinomial.size	1	1	Gm16897	FALSE
OK	negbinomial.size	0.960044260836231	1	A330023F24Rik	FALSE
OK	negbinomial.size	1	1	Gm32250	FALSE
OK	negbinomial.size	1	1	Gm37027	FALSE
OK	negbinomial.size	0.342886782074073	1	Cd46	FALSE
OK	negbinomial.size	0.0169544957744137	0.258730580334108	Cr1l	TRUE
OK	negbinomial.size	0.0256570654790036	0.349314749225034	Cr2	FALSE
OK	negbinomial.size	1	1	Fam171a1	FALSE
OK	negbinomial.size	0.0131784526162961	0.213108929093515	Nmt2	FALSE
OK	negbinomial.size	1	1	Rpp38	FALSE
OK	negbinomial.size	1	1	Acbd7	FALSE
OK	negbinomial.size	1	1	Olah	FALSE
OK	negbinomial.size	1	1	Gm37525	FALSE
OK	negbinomial.size	0.482906824246188	1	Meig1	FALSE
OK	negbinomial.size	0.214289058350249	1	Dclre1c	TRUE
OK	negbinomial.size	0.467166126042496	1	Suv39h2	FALSE
OK	negbinomial.size	1	1	Gm13184	FALSE
OK	negbinomial.size	0.964730937098838	1	Hspa14	TRUE
OK	negbinomial.size	0.556348941967432	1	Gm45902	FALSE
OK	negbinomial.size	1	1	Cdnf	FALSE
OK	negbinomial.size	0.047726571826647	0.53784014406513	Fam107b	TRUE
OK	negbinomial.size	1	1	Gm13185	FALSE
OK	negbinomial.size	1	1	Gm13180	FALSE
OK	negbinomial.size	1	1	Gm13191	FALSE
OK	negbinomial.size	0.0187232881229055	0.280338988271675	Frmd4a	FALSE
OK	negbinomial.size	1	1	Gm10862	FALSE
OK	negbinomial.size	1	1	Gm38085	FALSE
OK	negbinomial.size	1	1	1700080N15Rik	FALSE
OK	negbinomial.size	1	1	Gm13189	FALSE
OK	negbinomial.size	1	1	Gm37814	FALSE
OK	negbinomial.size	1	1	Gm37107	FALSE
OK	negbinomial.size	1	1	Gm38348	FALSE
OK	negbinomial.size	1	1	Gm13187	FALSE
OK	negbinomial.size	0.645485094849324	1	Gm36988	FALSE
OK	negbinomial.size	1	1	Gm13175	FALSE
OK	negbinomial.size	1	1	Gm13179	FALSE
OK	negbinomial.size	0.215332797351039	1	Prpf18	TRUE
OK	negbinomial.size	0.64548509484932	1	Bend7	FALSE
OK	negbinomial.size	0.744760212234591	1	Sephs1	FALSE
OK	negbinomial.size	0.00623059405194347	0.117626174007563	Phyh	TRUE
OK	negbinomial.size	1	1	Ucma	FALSE
OK	negbinomial.size	1	1	Mcm10	FALSE
OK	negbinomial.size	0.532557028520956	1	Optn	FALSE
OK	negbinomial.size	1	1	4930551O13Rik	FALSE
OK	negbinomial.size	1	1	Ccdc3	FALSE
OK	negbinomial.size	0.830760311623496	1	Camk1d	TRUE
OK	negbinomial.size	0.253176561562894	1	Cdc123	TRUE
OK	negbinomial.size	0.104745281684543	0.883702670831527	Nudt5	FALSE
OK	negbinomial.size	0.699838664052643	1	Gm13199	FALSE
OK	negbinomial.size	0.492251589715545	1	Sec61a2	FALSE
OK	negbinomial.size	1	1	Gm13267	FALSE
OK	negbinomial.size	1	1	Dhtkd1	FALSE
OK	negbinomial.size	0.0114588722170653	0.190796805676512	Upf2	TRUE
OK	negbinomial.size	0.48290682424617	1	Proser2	FALSE
OK	negbinomial.size	1	1	Gm10857	FALSE
OK	negbinomial.size	0.240433793486137	1	Echdc3	FALSE
OK	negbinomial.size	1	1	A230108P19Rik	FALSE
OK	negbinomial.size	0.666435614902633	1	Gm13383	FALSE
OK	negbinomial.size	1	1	AL845275.1	FALSE
OK	negbinomial.size	0.688298561444922	1	Usp6nl	FALSE
OK	negbinomial.size	1	1	Gm13388	FALSE
OK	negbinomial.size	0.410996200209108	1	Gm13391	FALSE
OK	negbinomial.size	0.000814699279169644	0.0220385723631084	Celf2	TRUE
OK	negbinomial.size	1	1	Gm13389	FALSE
OK	negbinomial.size	1	1	Gm10855	FALSE
OK	negbinomial.size	1	1	Gm10115	FALSE
OK	negbinomial.size	1	1	Gm28641	FALSE
OK	negbinomial.size	1	1	Gm13211	FALSE
OK	negbinomial.size	1	1	1700061F12Rik	FALSE
OK	negbinomial.size	1	1	Gm13219	FALSE
OK	negbinomial.size	1	1	Gm13218	FALSE
OK	negbinomial.size	1	1	Gata3	FALSE
OK	negbinomial.size	1	1	Gm13256	FALSE
OK	negbinomial.size	1	1	4930412O13Rik	FALSE
OK	negbinomial.size	1	1	9230102O04Rik	FALSE
OK	negbinomial.size	1	1	Gm13262	FALSE
OK	negbinomial.size	0.021024905661229	0.302115901535797	Taf3	TRUE
OK	negbinomial.size	0.00436909900716636	0.0887131442935128	Atp5c1	TRUE
OK	negbinomial.size	0.248236177697667	1	Kin	TRUE
OK	negbinomial.size	1	1	Itih2	FALSE
OK	negbinomial.size	1	1	Itih5	FALSE
OK	negbinomial.size	0.607531493246181	1	Gm13261	FALSE
OK	negbinomial.size	0.380541869574336	1	Sfmbt2	FALSE
OK	negbinomial.size	1	1	Gm13264	FALSE
OK	negbinomial.size	0.645485094849324	1	Prkcq	FALSE
OK	negbinomial.size	1	1	Gm38171	FALSE
OK	negbinomial.size	1	1	8030442B05Rik	FALSE
OK	negbinomial.size	1	1	Gm13293	FALSE
OK	negbinomial.size	1	1	Gm13291	FALSE
OK	negbinomial.size	0.0401502653793229	0.480387869074682	Pfkfb3	TRUE
OK	negbinomial.size	0.389208870632741	1	Gm10851	FALSE
OK	negbinomial.size	0.38756354027301	1	Rbm17	TRUE
OK	negbinomial.size	1	1	Gm17490	FALSE
OK	negbinomial.size	0.265463314221682	1	Il2ra	FALSE
OK	negbinomial.size	0.0583656993104753	0.621327822471534	Il15ra	FALSE
OK	negbinomial.size	0.0550095717082449	0.596630891265508	Fbh1	FALSE
OK	negbinomial.size	0.212373513177566	1	Ankrd16	FALSE
OK	negbinomial.size	0.674506346952902	1	Itga8	FALSE
OK	negbinomial.size	1	1	E030013I19Rik	FALSE
OK	negbinomial.size	0.385316836088438	1	Mindy3	TRUE
OK	negbinomial.size	1	1	Gm37565	FALSE
OK	negbinomial.size	0.675650494960602	1	Pter	FALSE
OK	negbinomial.size	1	1	C1ql3	FALSE
OK	negbinomial.size	0.714242048972305	1	Rsu1	TRUE
OK	negbinomial.size	1	1	Gm13270	FALSE
OK	negbinomial.size	1	1	Cubn	FALSE
OK	negbinomial.size	0.726430027649546	1	Trdmt1	FALSE
OK	negbinomial.size	1.12469298894802e-180	5.18081791837557e-177	Vim	TRUE
OK	negbinomial.size	0.223548898948272	1	St8sia6	FALSE
OK	negbinomial.size	1	1	Gm37126	FALSE
OK	negbinomial.size	0.0043561571353032	0.0886242732669529	Hacd1	FALSE
OK	negbinomial.size	0.299364483740436	1	Stamos	FALSE
OK	negbinomial.size	0.117309739896951	0.947612901665511	Stam	FALSE
OK	negbinomial.size	0.645485094849297	1	Tmem236	FALSE
OK	negbinomial.size	0.243310187915779	1	Mrc1	FALSE
OK	negbinomial.size	1	1	Slc39a12	FALSE
OK	negbinomial.size	1	1	Gm13266	FALSE
OK	negbinomial.size	0.60753149324608	1	Cacnb2	FALSE
OK	negbinomial.size	0.146008798589445	1	Gm10848	FALSE
OK	negbinomial.size	1	1	Gm13269	FALSE
OK	negbinomial.size	0.295728675668624	1	Nsun6	FALSE
OK	negbinomial.size	0.419660213292531	1	Arl5b	TRUE
OK	negbinomial.size	1	1	Malrd1	FALSE
OK	negbinomial.size	0.118593257740701	0.951964051742318	Plxdc2	FALSE
OK	negbinomial.size	1	1	Gm13322	FALSE
OK	negbinomial.size	1	1	Nebl	FALSE
OK	negbinomial.size	1	1	Gm13324	FALSE
OK	negbinomial.size	1	1	H2al2a	FALSE
OK	negbinomial.size	1	1	A930004D18Rik	FALSE
OK	negbinomial.size	1	1	Gm13330	FALSE
OK	negbinomial.size	1	1	Skida1	FALSE
OK	negbinomial.size	1	1	1810059C17Rik	FALSE
OK	negbinomial.size	0.316961731480894	1	Mllt10	TRUE
OK	negbinomial.size	0.392010615726384	1	Dnajc1	TRUE
OK	negbinomial.size	0.424473412245114	1	Commd3	TRUE
OK	negbinomial.size	0.0232382587886478	0.326073827084399	Bmi1	FALSE
OK	negbinomial.size	1	1	Spag6	FALSE
OK	negbinomial.size	1	1	Gm20539	FALSE
OK	negbinomial.size	1	1	Carlr	FALSE
OK	negbinomial.size	0.00178959288081765	0.0432574381124177	Pip4k2a	TRUE
OK	negbinomial.size	0.299649968795575	1	4930426L09Rik	FALSE
OK	negbinomial.size	0.530032713149409	1	Armc3	FALSE
OK	negbinomial.size	0.342886782074067	1	4930447M23Rik	FALSE
OK	negbinomial.size	0.77372842275005	1	Msrb2	FALSE
OK	negbinomial.size	1	1	Gm33940	FALSE
OK	negbinomial.size	1	1	Gm13344	FALSE
OK	negbinomial.size	1	1	Ptf1aos	FALSE
OK	negbinomial.size	1	1	Ptf1a	FALSE
OK	negbinomial.size	1	1	1810010K12Rik	FALSE
OK	negbinomial.size	1	1	4921504E06Rik	FALSE
OK	negbinomial.size	1	1	Gm13348	FALSE
OK	negbinomial.size	0.676575819258024	1	Otud1	FALSE
OK	negbinomial.size	1	1	Gm13346	FALSE
OK	negbinomial.size	1	1	Etl4	FALSE
OK	negbinomial.size	1	1	Gm17171	FALSE
OK	negbinomial.size	1	1	Gm13335	FALSE
OK	negbinomial.size	1	1	Gm13362	FALSE
OK	negbinomial.size	0.39535498815284	1	Arhgap21	FALSE
OK	negbinomial.size	1	1	Gm13380	FALSE
OK	negbinomial.size	1	1	Gm13375	FALSE
OK	negbinomial.size	1	1	Gm13376	FALSE
OK	negbinomial.size	0.143445538661263	1	Enkur	FALSE
OK	negbinomial.size	0.194258509336605	1	Thnsl1	FALSE
OK	negbinomial.size	1	1	Gm13327	FALSE
OK	negbinomial.size	1	1	Gpr158	FALSE
OK	negbinomial.size	1	1	Myo3a	FALSE
OK	negbinomial.size	1	1	Gad2	FALSE
OK	negbinomial.size	1	1	1700092C17Rik	FALSE
OK	negbinomial.size	1.12291369970763e-30	3.62083522470724e-28	Apbb1ip	TRUE
OK	negbinomial.size	0.854166535634464	1	Pdss1	FALSE
OK	negbinomial.size	0.577137728138261	1	Abi1	TRUE
OK	negbinomial.size	0.26061036793083	1	Acbd5	TRUE
OK	negbinomial.size	0.467166126042463	1	Mastl	FALSE
OK	negbinomial.size	0.119832032744091	0.957379557936873	Yme1l1	TRUE
OK	negbinomial.size	1	1	4931423N10Rik	FALSE
OK	negbinomial.size	1	1	Nxph2	FALSE
OK	negbinomial.size	0.0199875673065253	0.291687157835186	Spopl	TRUE
OK	negbinomial.size	0.303956552953875	1	Hnmt	FALSE
OK	negbinomial.size	1	1	Tbpl2	FALSE
OK	negbinomial.size	1	1	Il1f8	FALSE
OK	negbinomial.size	0.578473697321784	1	Il1f9	FALSE
OK	negbinomial.size	1	1	Il1f6	FALSE
OK	negbinomial.size	1	1	Il1f5	FALSE
OK	negbinomial.size	1	1	Il1f10	FALSE
OK	negbinomial.size	1	1	Gm13411	FALSE
OK	negbinomial.size	1.5598442586055e-07	9.34891786593578e-06	Il1rn	TRUE
OK	negbinomial.size	0.368904790563846	1	Psd4	FALSE
OK	negbinomial.size	0.645485094849289	1	Pax8	FALSE
OK	negbinomial.size	1	1	Gm13415	FALSE
OK	negbinomial.size	1	1	Gm13417	FALSE
OK	negbinomial.size	0.645485094849328	1	Cacna1b	FALSE
OK	negbinomial.size	0.276157258094759	1	Ehmt1	TRUE
OK	negbinomial.size	0.441438936282915	1	Arrdc1	TRUE
OK	negbinomial.size	0.479104645990461	1	Zmynd19	FALSE
OK	negbinomial.size	0.467166126042496	1	Dph7	FALSE
OK	negbinomial.size	0.39546248057598	1	Mrpl41	FALSE
OK	negbinomial.size	0.335481986612561	1	Pnpla7	TRUE
OK	negbinomial.size	0.0959967366154318	0.840044786716153	Nsmf	FALSE
OK	negbinomial.size	1	1	Entpd8	FALSE
OK	negbinomial.size	1	1	Noxa1	FALSE
OK	negbinomial.size	1	1	Gm13387	FALSE
OK	negbinomial.size	8.94750155538161e-05	0.00313234855829927	Nrarp	FALSE
OK	negbinomial.size	1	1	Gm38287	FALSE
OK	negbinomial.size	0.0709813798529224	0.704142549201556	Tor4a	FALSE
OK	negbinomial.size	0.586278299432017	1	Nelfb	TRUE
OK	negbinomial.size	1	1	Stpg3	FALSE
OK	negbinomial.size	1	1	Fam166a	FALSE
OK	negbinomial.size	0.0953835846002997	0.837365555523187	Tubb4b	TRUE
OK	negbinomial.size	1	1	Slc34a3	FALSE
OK	negbinomial.size	1	1	Rnf224	FALSE
OK	negbinomial.size	1	1	Cysrt1	FALSE
OK	negbinomial.size	1	1	Rnf208	FALSE
[truncated: 30,246 more rows]
