# Supplementary material for: Single-Cell Transcriptomic Profiles of Lung Pre-Metastatic Niche Reveal Neutrophil and Lymphatic Endothelial Cell Roles in Breast Cancer
Source: Cancers (Basel). 2022 Dec 28;15(1):176. doi: 10.3390/cancers15010176 (PMC9818165; doi:10.3390/cancers15010176)
Supplement: Supplementary file 1 [file cancers-15-00176-s001.zip › Table S3.xlsx]

## Sheet: 工作表1
gene_name	module	color	kME_M1	kME_M2	kME_M3	kME_M4	kME_M5	kME_M6	kME_grey
S100a9	M6	brown	0.0184184	-0.174651	-0.205001	0.0590416	0.156943	0.134913	0.0844638
S100a8	M6	brown	-0.000155299	-0.177871	-0.198621	0.0839127	0.14321	0.10727	0.088168
H2-Ab1	M6	brown	-0.0236406	-0.0609046	-0.0327882	0.00448382	0.183571	0.27286	0.165137
H2-Aa	M6	brown	-0.0279845	-0.0663566	-0.0341993	0.0105217	0.191604	0.277111	0.178493
Ccl4	M6	brown	-0.0810946	-0.0127244	0.0549675	0.105704	0.109331	0.146734	0.104315
Cd74	M6	brown	0.207833	0.084383	-0.0632455	-0.13303	0.11863	0.19933	0.102416
Cxcl2	M2	yellow	-0.0409753	-0.397314	-0.401677	0.169371	0.133196	0.137953	0.239895
G0s2	M1	turquoise	0.088585	-0.144559	-0.20072	-0.00903856	0.123928	0.135326	0.098379
Igkc	grey	grey	0.0342643	-0.0513802	-0.0766485	-0.00140462	0.141596	0.191195	0.0489045
Cd209a	M6	brown	-0.0692602	-0.0626861	0.0203251	0.0423718	0.103979	0.109114	0.14
Ccl3	M6	brown	-0.0141803	-0.0343494	0.0415092	0.115632	0.0766162	0.149119	0.0975244
Ifitm1	M2	yellow	-0.0119457	-0.20963	-0.215546	0.102191	0.161865	0.116493	0.114545
Wfdc21	grey	grey	-0.081757	-0.201377	-0.16287	0.188962	0.0848216	-0.0209679	0.086752
Rgs1	M1	turquoise	0.065879	-0.082324	-0.121439	-0.0108296	0.0374821	0.147862	0.104524
Cd79a	M1	turquoise	0.0490063	-0.0413106	-0.0655754	-0.00748887	0.128397	0.180829	0.0541322
Ptgs2	M2	yellow	-0.135365	-0.376364	-0.310247	0.232779	0.0880242	0.0362428	0.150471
Ccl2	M6	brown	-0.0852574	-0.03125	0.061248	0.144258	0.080891	0.147087	0.0734182
Thbs1	M2	yellow	-0.326623	-0.47852	-0.289709	0.447623	0.00484461	-0.0893927	0.17285
Hdc	M4	blue	0.0498244	-0.207789	-0.24565	0.0608835	0.177405	0.165253	0.130462
Gadd45b	M1	turquoise	0.0299821	-0.184065	-0.238393	0.0330181	0.0921043	0.174182	0.133672
Basp1	M1	turquoise	0.0497373	-0.0812017	-0.120391	-0.0480411	0.0256931	0.0235872	0.123785
Asprv1	M6	brown	0.0509066	-0.111554	-0.135607	0.0302918	0.156606	0.122032	0.135235
Tnfsf9	grey	grey	-0.0346435	-0.0778939	-0.0414169	0.0459477	0.118611	0.084045	0.0693707
Cxcl1	M5	green	-0.0450476	-0.171183	-0.158036	0.0824847	0.0764282	0.0775258	0.0583184
Tbc1d4	M4	blue	0.00170726	-0.0926343	-0.0991453	-0.00183851	0.069093	0.0220096	0.0371483
Lmna	M2	yellow	-0.13234	-0.235205	-0.132824	0.153325	0.0613059	0.11654	0.177973
Retnlg	M6	brown	0.00695248	-0.133736	-0.130238	0.0722048	0.0886533	0.071315	0.0827429
Hes1	M1	turquoise	0.269957	0.245688	0.187766	-0.157387	0.0105131	0.124404	-0.0608093
Cxcl10	M5	green	-0.000517212	-0.0537085	-0.0394348	0.00112243	0.137969	0.0626248	0.0110086
Ly6c2	M4	blue	-0.327365	-0.315334	-0.0641294	0.514764	0.0577822	0.0998833	0.222066
Icam1	M6	brown	-0.0290388	-0.092722	-0.0657162	0.0520082	0.140889	0.158986	0.0842574
Chil3	M4	blue	-0.283385	-0.284574	-0.0658017	0.47666	0.0591174	-0.0159726	0.118947
Mt1	M4	blue	-0.0714064	-0.113189	-0.0446946	0.125704	0.0132425	-0.00905836	0.0489518
Ccrl2	M6	brown	-0.0136097	-0.103765	-0.153067	0.143283	0.0334347	0.0662072	0.0803618
Hspa1a	M6	brown	0.0470488	0.183563	0.317447	0.0979254	0.112097	0.377551	0.0377479
Il1b	M3	red	0.0740966	-0.212283	-0.250566	0.131475	0.0625694	0.0108176	0.128971
Egr1	M6	brown	0.00856991	-0.117859	-0.100425	0.0791654	0.128197	0.197702	0.162522
Ighd	M1	turquoise	0.0573531	-0.0167004	-0.0470566	-0.018946	0.109009	0.144263	0.0501612
Grasp	M1	turquoise	0.00239843	-0.0920055	-0.125384	-0.0377378	0.066887	0.12632	0.101316
Gm14636	M2	yellow	-0.0148436	-0.128505	-0.122815	0.0401429	0.0829797	0.0550888	0.0479739
Ier3	M2	yellow	-0.230505	-0.410206	-0.291113	0.343266	0.0929312	0.0431869	0.153755
Saa3	M4	blue	-0.0408199	-0.154982	-0.147655	0.132273	0.0602796	0.037864	0.10017
Wfdc17	M4	blue	-0.388184	-0.445668	-0.165818	0.611015	0.179847	0.17205	0.169594
Tnf	M5	green	0.00558261	-0.0420639	-0.00370334	0.0343653	0.0820259	0.0697797	0.106238
Cxcr2	M1	turquoise	0.0283089	-0.165261	-0.189541	0.0714852	0.132288	0.126953	0.11991
Areg	M5	green	-0.0225845	-0.0919283	-0.10921	-0.0174277	0.0536312	0.05929	0.0120615
Lrg1	M6	brown	-0.0311728	-0.218436	-0.204544	0.174705	0.128842	0.154865	0.175063
Hspa1b	M6	brown	0.0726362	0.195423	0.313369	0.0664061	0.101355	0.366826	-0.00218926
Klrd1	M6	brown	-0.024131	-0.0643502	-0.0465768	0.0171397	0.0928816	0.0504939	0.0971258
Spata7	grey	grey	-0.0473261	-0.0475721	-0.0598314	0.0639267	-0.00492294	0.0160733	-0.0605149
Hba-a1	grey	grey	-0.0163073	-0.0611497	-0.0616484	0.00677772	0.0503958	0.0590724	0.0497143
H2-DMb1	M4	blue	-0.111126	-0.165415	-0.0696197	0.152625	0.201463	0.274475	0.224003
Crip2	M5	green	-0.0258949	-0.064086	-0.0303596	0.0557147	0.12561	0.125428	0.0574673
Bcl2a1b	M1	turquoise	0.194541	-0.00651611	-0.159098	-0.144112	0.020309	0.0435179	0.0669467
Mxd1	M4	blue	-0.0376324	-0.288073	-0.252803	0.185742	0.170493	0.183913	0.205062
Mgl2	M6	brown	0.0060521	-0.0278815	0.00205059	0.00755792	-0.00801083	-0.00341241	0.064028
Cd7	M6	brown	-0.0430312	-0.0787889	-0.031611	0.035176	0.0982038	0.0874551	0.0756678
Ccl5	M6	brown	0.0327076	-0.017314	0.00645021	0.0273027	0.0469482	0.0746756	0.0379793
Il1r2	M2	yellow	-0.00338304	-0.209057	-0.215297	0.0571546	0.182462	0.131865	0.147509
Ccr7	M6	brown	0.0257735	-0.0672134	-0.0813637	-0.0179564	0.0416933	0.0339142	0.0476374
Fn1	M4	blue	-0.507515	-0.406513	-0.124555	0.549299	0.0776448	0.0660069	0.0708926
H2-DMb2	M6	brown	-0.00996282	-0.0425524	-0.0228045	-0.00630519	0.0337931	0.120335	0.0833887
Hilpda	M3	red	-0.00326067	-0.08873	-0.111119	0.00704124	0.0294211	0.0713064	0.0599408
Fdps	M5	green	-0.0354849	-0.0458925	-0.0254086	0.0719117	0.145695	0.158748	0.169095
Cited4	M1	turquoise	0.0881171	0.0573404	0.0401406	-0.042229	-0.0580343	0.0320078	0.0741123
Lyz1	M4	blue	-0.022382	-0.0434407	0.00478399	0.0691423	-0.0414905	0.0638824	0.0794832
Cd209d	M2	yellow	-0.0694437	-0.0322328	0.0441678	0.0397047	0.0624339	0.0791231	0.0883611
Ly6d	M1	turquoise	0.0330338	-0.0469962	-0.0645189	-0.00144221	0.117588	0.163156	0.04543
Tnip3	M1	turquoise	0.0508021	-0.0609967	-0.107873	-0.0072058	0.0297776	0.0172418	0.0606365
F630028O10Rik	M6	brown	0.00203788	0.0530868	0.0759451	0.0474588	0.056165	0.0767992	-0.000883855
Cst3	M1	turquoise	0.592158	0.188728	-0.0526292	-0.157006	0.14941	0.194414	0.223089
Stfa2l1	M6	brown	0.0345347	-0.146902	-0.175875	0.0544301	0.0992101	0.104178	0.0731599
Ankrd33b	grey	grey	0.0629889	-0.138157	-0.176248	-0.013849	0.13146	0.133523	0.14139
Il6	M2	yellow	-0.118493	-0.164624	-0.118466	0.183953	0.0672091	0.0401709	0.0693448
Mir155hg	M2	yellow	-0.0156116	-0.0814369	-0.10712	-0.0073465	0.0246065	0.0827139	0.0617533
Cd69	M6	brown	0.0875581	-0.0190105	-0.0330975	-0.0411501	0.0611732	0.0364064	0.0179199
Errfi1	M2	yellow	-0.108513	-0.229869	-0.189074	0.13941	0.0531389	0.0692431	0.107301
Bambi	M5	green	-0.0189961	-0.055796	-0.0557375	0.11604	0.0537556	0.0231867	0.0819217
Clec10a	M4	blue	-0.100418	-0.127483	-0.0740272	0.0944197	0.0350837	0.114714	0.122764
Mrgpra2b	grey	grey	0.00136323	-0.132413	-0.137798	0.0431011	0.120731	0.131511	0.132124
Sdc4	M5	green	0.0255042	-0.0791634	-0.0864736	-0.007253	0.0108981	0.0262777	0.0416946
Cstdc5	M6	brown	-0.00820963	-0.105589	-0.11768	0.0609795	0.111353	0.0724129	0.0223116
Vcan	M4	blue	-0.345786	-0.391429	-0.181395	0.476795	0.00389375	-0.0146609	0.0838581
Cadm1	M6	brown	-0.016063	-0.0737878	-0.0180484	0.00804544	0.0327312	0.0500921	0.0648628
Marcksl1	M5	green	-0.00100996	-0.238976	-0.264563	0.0718714	0.245624	0.194959	0.173848
Cxcl3	M2	yellow	-0.0759809	-0.113254	-0.0761549	0.10618	-0.00240981	-0.0148096	0.0813904
Cd63	M5	green	0.0300718	-0.0875933	-0.0834287	-0.0042972	0.0221748	0.0687881	0.0745693
AW112010	M5	green	0.0236456	-0.0384956	-0.0294869	0.0149028	0.0361811	0.0356053	0.047464
Cd14	M2	yellow	-0.320951	-0.684315	-0.50651	0.533413	0.168101	0.0369185	0.245854
Lcn2	grey	grey	-0.0559003	-0.179301	-0.138086	0.167478	0.0346839	-0.00309183	0.0644752
Nfkbia	M3	red	0.205429	-0.198086	-0.33871	0.0874162	0.163272	0.0608171	0.15862
Maf	M6	brown	-0.0628755	-0.0337931	0.0522012	0.136037	0.0505596	0.0918038	0.0404209
Atf3	M6	brown	-0.0736255	-0.119762	-0.000329967	0.245582	0.123352	0.198864	0.132251
Klra17	M6	brown	-0.00565961	-0.0670592	-0.072762	0.0100289	0.0417029	0.0382517	-0.0213381
Fabp5	M5	green	-0.0487793	-0.0619706	-0.0147611	0.103292	0.102517	0.0296122	0.00336944
Osm	M4	blue	-0.207293	-0.30882	-0.201803	0.338163	0.0802253	0.0494281	0.157611
Iglc2	M1	turquoise	0.0656012	0.0168867	0.00031022	-0.03718	0.067639	0.0965215	0.0172728
Dusp2	M1	turquoise	0.165033	-0.0131609	-0.10691	-0.0771978	0.168736	0.19755	0.145925
Isg15	M2	yellow	-0.00901999	-0.140786	-0.120567	0.116779	0.107068	0.12227	0.163902
Slc7a11	M2	yellow	-0.100846	-0.334113	-0.272528	0.223669	0.0270256	0.0179542	0.125763
Pmepa1	M5	green	-0.0237932	-0.0966837	-0.104719	-0.00815998	0.0182392	0.0927631	0.055979
Lgals1	M4	blue	-0.210152	-0.269751	-0.107944	0.49795	0.165037	0.195036	0.231842
Slpi	M4	blue	-0.234415	-0.286863	-0.105941	0.42054	0.0141377	-0.000879323	0.125101
Jun	M6	brown	0.157403	0.00852563	0.0505278	0.0142117	0.109453	0.163973	0.0721213
Apoe	M1	turquoise	0.0957383	-0.128967	-0.100952	0.210737	0.0953279	0.142073	0.0990822
Cd24a	M5	green	0.0104464	-0.137314	-0.152825	0.0235511	0.154375	0.205704	0.193508
Ccnd2	M1	turquoise	0.115594	0.00665852	-0.0884268	-0.083559	0.0730424	0.0977586	0.000521876
Cstdc4	M6	brown	0.00969272	-0.115273	-0.134081	0.0529706	0.124923	0.102386	0.0504541
Hcar2	M6	brown	0.0273446	-0.11056	-0.126301	0.0955228	0.102953	0.135037	0.116487
Vim	M4	blue	-0.369225	-0.5769	-0.249686	0.676075	0.308876	0.16033	0.239697
Mafb	M4	blue	-0.215682	-0.281662	-0.138989	0.273459	0.0756568	0.0497547	0.0858652
Crip1	M4	blue	-0.130227	-0.386861	-0.197582	0.501125	0.298426	0.190583	0.25722
Ifi30	M4	blue	-0.215136	-0.302844	-0.048039	0.496216	0.206336	0.249088	0.232554
Hmox1	M6	brown	0.0611754	0.0362582	0.030132	0.0789144	0.0436053	0.161105	0.0560989
Cd83	M1	turquoise	0.172177	-0.0831771	-0.251263	-0.118812	0.0302663	0.10018	0.113228
Med21	M6	brown	0.0669114	-0.0435943	-0.0572002	0.0339358	0.116797	0.150934	0.128969
Rsad2	M6	brown	0.0543252	0.0669795	0.0860916	-0.0270602	0.0780155	0.111742	0.00235779
F13a1	M4	blue	-0.411793	-0.373023	-0.0960483	0.606878	0.0319019	0.0572871	0.180821
Serpina3g	grey	grey	-0.00600982	-0.0217904	-0.0129433	0.0498256	0.114866	0.0721924	0.051236
Bst2	M4	blue	-0.0824193	-0.0815574	0.00719643	0.126672	0.0721185	0.142884	0.115576
Il1rn	M2	yellow	-0.00243323	-0.213333	-0.22077	0.0971247	0.146412	0.162438	0.121199
Gadd45a	grey	grey	-0.0131103	-0.108553	-0.0965167	0.133919	0.0639242	0.0769863	0.0904226
Hsph1	M6	brown	0.0476476	0.0654456	0.106053	0.0265343	0.0591721	0.165029	0.0954043
Malt1	M1	turquoise	0.0643569	-0.155273	-0.184007	0.041045	0.149911	0.153895	0.0817059
Hbb-bs	grey	grey	-0.0205189	-0.0680703	-0.0701781	0.010378	0.053942	0.0648334	0.0488322
Fabp4	M1	turquoise	0.285467	0.212496	0.110269	-0.230367	-0.0695889	-0.0718299	-0.049238
Lmnb1	M3	red	0.0182396	-0.295849	-0.341946	0.13759	0.098376	0.101345	0.210562
Dab2	M6	brown	-0.0140354	-0.0753861	-0.00949178	0.0239541	0.0343642	0.0480837	0.0626903
Acod1	grey	grey	0.0745583	-0.127561	-0.164731	0.00300566	0.132046	0.116255	0.115993
Gadd45g	M6	brown	0.116048	0.0325647	0.0196073	-0.0383266	0.0315203	0.132206	0.053561
Rrad	M1	turquoise	0.0241139	-0.0207347	-0.0464904	-0.0327496	0.0583085	0.0410129	0.092933
Rgcc	M2	yellow	-0.0564284	-0.172562	-0.0959307	0.119997	0.0284563	-0.025505	0.0920725
Slc2a3	M6	brown	0.00363558	-0.130744	-0.134045	0.0599288	0.10026	0.141051	0.169385
Ralgps2	M1	turquoise	0.0303701	-0.0337294	-0.0366282	0.00628304	0.101113	0.12435	0.0232546
Ighm	M1	turquoise	0.228716	0.069969	-0.0267914	-0.104889	0.0711995	0.135223	0.0775523
Hpgd	M1	turquoise	0.118128	0.0643994	-0.0671636	-0.0565359	0.0237809	-0.00796902	0.048797
Tmem176b	M4	blue	-0.171609	-0.170836	-0.00853904	0.316377	0.229462	0.274495	0.175594
Dmkn	M2	yellow	-0.107871	-0.198561	-0.107109	0.199593	-0.0183099	-0.0483836	0.0575887
S100a10	M4	blue	-0.292287	-0.463007	-0.136928	0.651855	0.281252	0.201052	0.245461
Ifi27l2a	M4	blue	-0.175724	-0.202653	-0.0689117	0.381434	0.0827675	0.16319	0.163599
Irf8	M6	brown	-0.0791559	-0.0370974	0.0870823	0.141504	0.129954	0.215427	0.108577
Ddit4	M1	turquoise	0.119059	0.106207	0.0977323	-0.0501843	0.0106351	0.119497	0.0645638
Emp1	M4	blue	-0.331488	-0.432952	-0.237608	0.417991	0.149872	0.0938824	0.174988
Id1	M1	turquoise	-0.00223332	-0.00333858	-0.014196	0.0789652	0.0468045	-0.0167098	-0.040969
Axl	M6	brown	0.00288746	-0.0154358	0.0193461	0.0360236	0.0957853	0.134948	0.057757
Nr4a2	M2	yellow	-0.226735	-0.474581	-0.358669	0.295542	0.131661	0.0203034	0.161754
Hist1h2ac	M3	red	-0.0822368	-0.131599	-0.105498	0.097417	-0.00501238	-0.0173798	0.0772438
Mmp9	grey	grey	0.0383264	-0.182833	-0.214986	0.0482299	0.119592	0.140871	0.13765
Adam23	M6	brown	0.00823575	-0.0338216	-0.00333933	-0.0237325	0.0438518	-0.00584521	0.0297036
Rhoh	M6	brown	0.0554444	-0.0318694	-0.0248555	-0.0142906	0.0422104	0.113791	0.0318354
Serpinb9	grey	grey	0.00493699	-0.0347555	0.0128365	0.0264862	0.00303934	0.0324489	0.0270748
H2-Eb1	M6	brown	-0.0146405	-0.070852	-0.0424859	0.00184228	0.151131	0.147681	0.0612507
Apoc2	M1	turquoise	0.111395	-0.0483091	-0.0963234	0.102659	-0.0406007	-0.0117084	0.0650885
Id3	M1	turquoise	0.035942	-0.0630011	-0.0916421	0.088058	0.0870912	0.12229	0.107052
Rhob	M6	brown	-0.0797997	0.0290421	0.1745	0.238908	0.126019	0.311357	0.0930241
C1qc	M6	brown	-0.01583	0.00622614	0.06319	-0.0237721	0.0340672	0.00581695	0.0131553
Cd79b	M1	turquoise	0.0637621	-0.0239053	-0.0527993	-0.0091337	0.111881	0.162954	0.0542198
Mmp12	M5	green	-0.0163863	-0.0771364	-0.0306913	0.0358633	0.0297193	0.0667791	0.0439328
Mpp7	M3	red	-0.10125	-0.337712	-0.369267	0.142402	0.0887872	0.0257134	0.108266
Traf1	M1	turquoise	0.231069	-0.0118385	-0.21593	-0.133113	0.107554	0.057868	0.0779197
Vps37b	M1	turquoise	0.0594539	-0.190871	-0.236768	0.0578722	0.192651	0.191794	0.180642
Fgl2	M4	blue	-0.185392	-0.261472	-0.0995191	0.300202	0.140865	0.164274	0.163906
Nr4a3	M3	red	-0.0789676	-0.280774	-0.294823	0.125437	0.0402394	0.05042	0.139315
Tagln2	M4	blue	-0.122305	-0.341234	-0.201124	0.460247	0.328075	0.148865	0.218188
Tnfaip3	M3	red	-0.0668486	-0.356621	-0.395094	0.164813	0.157544	0.0948706	0.124652
Clec4b1	M6	brown	-0.0569488	-0.0422782	0.0326689	0.0951569	0.141445	0.111032	0.0917338
Jdp2	M3	red	-0.0195198	-0.226962	-0.261702	0.0725025	0.0481635	0.0034037	0.102599
Fam71a	M6	brown	-0.0539247	0.00753552	0.0761152	0.0460458	0.0397201	0.0856251	0.066654
Plin2	M6	brown	0.000559932	0.0708973	0.151475	0.116665	0.04834	0.233218	0.0963012
Wdcp	M4	blue	-0.0223645	-0.0843956	-0.0834532	0.0944533	-0.00509878	0.0227268	0.058609
Il4i1	M1	turquoise	-0.00315128	-0.0110605	-0.00413205	-0.0571119	-0.00962265	0.0151826	0.0440046
Ddit3	M6	brown	-0.0271795	-0.0244493	0.0205225	0.101926	0.12874	0.21606	0.0783443
Mmp19	M2	yellow	-0.270182	-0.441664	-0.26751	0.367335	0.0739005	-0.0623621	0.12234
Apold1	M2	yellow	-0.0588934	-0.159868	-0.10509	0.0644247	0.022361	0.0423254	0.0499331
Plscr1	grey	grey	0.0523308	-0.0885196	-0.0867157	0.0170445	0.0303167	0.0775737	0.101902
Tacstd2	M4	blue	-0.0318531	-0.0820702	-0.0467409	0.0818995	0.114194	0.0436818	0.0946904
Clec4e	M3	red	-0.0336036	-0.336574	-0.386383	0.211862	0.063177	0.022489	0.169452
Tnfrsf23	M6	brown	0.0110321	-0.00168391	0.0403609	0.0609915	0.0429438	0.105415	-0.0124007
Olfr889	M3	red	-0.032796	-0.0642031	-0.0613707	0.0314363	0.00479175	-0.00682383	0.0171855
Hsp90aa1	M6	brown	0.259162	0.0367942	0.0242082	0.0339577	0.201062	0.385511	0.130231
Ifi209	M6	brown	-0.144689	-0.0892546	0.0604343	0.281453	0.0713405	0.192103	0.0885376
Vegfa	M2	yellow	-0.128631	-0.29911	-0.206931	0.20456	0.0806151	0.0822661	0.0927101
Tmem176a	M4	blue	-0.170369	-0.183222	-0.0224409	0.286899	0.194465	0.252355	0.216875
Gm20186	M2	yellow	-0.0367127	-0.234891	-0.213217	0.0767321	0.118616	0.117133	0.131306
Tmcc3	M1	turquoise	0.0288978	-0.0564037	-0.076915	0.0483309	0.101381	0.0318837	0.0825389
C1qa	M6	brown	-0.0128209	0.0123036	0.0700138	-0.0242877	0.0426475	-8.95657e-05	0.0119314
Cd9	M1	turquoise	0.449487	0.15932	-0.121549	-0.269799	0.0393101	0.0227499	0.0757202
Hmgcs1	M5	green	0.00545705	-0.0346357	-0.0237938	0.0424286	0.135758	0.102911	0.0905219
Creb5	M5	green	-0.0121632	-0.0931504	-0.104083	0.0443033	0.049266	0.0735271	0.0967586
Il21r	M5	green	0.0383378	-0.061158	-0.0796318	0.00589027	0.115262	0.0704393	0.0701684
Id2	M3	red	0.0675844	-0.211149	-0.307982	0.103097	0.105779	0.066456	0.121581
Clec4d	M2	yellow	-0.175054	-0.480048	-0.377136	0.345807	0.101355	0.0323603	0.174277
Rnd3	M6	brown	-0.0760909	-0.0733066	0.0729196	0.163903	0.103978	0.185981	0.0406291
Kcnq1ot1	M1	turquoise	0.00315963	-0.0145953	-0.0507358	0.0172148	0.0333326	0.0774178	0.0320387
Ndrg1	M4	blue	-0.152886	-0.134624	-0.0658698	0.182835	0.0950519	0.0457871	0.0464099
Plet1	M5	green	-0.0141546	-0.0654886	-0.0649269	0.0200959	-0.0103442	0.0802589	0.0329726
Gzma	M1	turquoise	0.0385632	-0.000365775	0.0023395	0.0263826	0.0642107	0.0886751	0.0455252
Osgin1	M6	brown	0.0218216	0.0395736	0.0340248	0.0122143	0.00621097	0.0526607	0.0456277
Dhx40	M3	red	-0.0308247	-0.156579	-0.202004	0.100258	0.0962001	0.0397788	0.117061
Clic4	M3	red	-0.00453334	-0.146137	-0.152291	0.0302849	0.0831836	0.0548543	0.0465291
Etv3	M1	turquoise	-0.0132809	-0.145214	-0.136381	0.0785587	0.088533	0.0789776	0.116783
P2ry10	M1	turquoise	0.022996	-0.108488	-0.147787	-0.00959548	0.0418614	0.0499879	0.0662765
Atp1b1	M6	brown	-0.00554993	-0.00952447	0.0581559	0.0345864	0.0757496	0.0794473	0.0193544
Bank1	M1	turquoise	0.105748	0.0269672	-0.0220987	-0.0554494	0.0913928	0.141975	0.0523055
Kctd12	M6	brown	-0.0598279	-0.29582	-0.218076	0.271868	0.165758	0.232142	0.27437
H2-DMa	M4	blue	-0.192105	-0.238143	-0.0728046	0.280179	0.231	0.321713	0.237536
Trim35	M6	brown	-0.0254905	-0.0401139	0.00615087	0.0451639	0.0995047	0.119521	0.0274357
Cd300e	M1	turquoise	0.489409	0.278682	0.0250775	-0.339014	-0.0118812	-0.0251982	0.0325337
Cd81	M1	turquoise	0.160682	0.054698	-0.0233743	-0.112653	-0.0341641	0.000519088	0.0289134
Cd36	M1	turquoise	0.464598	0.291084	-0.0182661	-0.337998	-0.0372524	-0.0882005	-0.0517736
Cd93	M4	blue	-0.311312	-0.423134	-0.21794	0.443426	0.133619	0.0842896	0.163304
Mt2	M1	turquoise	0.0245523	-0.0233039	0.00345479	-0.00944321	-0.010423	-0.00938863	0.0301679
Taf4b	M2	yellow	-0.0607276	-0.13639	-0.117709	0.109267	0.0397714	0.0437347	0.10954
Sox4	M2	yellow	-0.0462003	-0.0855853	-0.058078	0.0117005	0.0273953	0.0681917	0.0393344
Ccl7	grey	grey	-0.0434811	-0.0450698	-0.0480236	0.0384534	0.0487604	0.0973928	0.00360786
Serpinb6b	M6	brown	0.0214582	-0.0142321	-0.00777635	-0.025692	-0.00104824	0.00937288	0.0141998
Hvcn1	M6	brown	0.0174283	-0.0617231	-0.0567553	0.0198432	0.101919	0.157346	0.0506907
Gm43936	M6	brown	-0.0477053	-0.0211066	0.0584362	0.0780534	0.0437668	0.0467557	-0.0446067
Slc5a3	M1	turquoise	-0.0465952	-0.0854374	-0.0498521	0.0992227	0.0355749	0.0739961	-0.0549803
Avpi1	M2	yellow	-0.061427	-0.204525	-0.185701	0.121551	0.113346	0.093935	0.167596
Lpl	M1	turquoise	0.0645858	0.0363654	0.0181764	-0.0458128	0.0199535	0.0452456	0.0701186
Ccr1	M4	blue	-0.191867	-0.430336	-0.315116	0.331973	0.0926988	0.0903672	0.218633
Gas5	M2	yellow	-0.117982	-0.47859	-0.306529	0.462242	0.259285	0.179361	0.302734
Hepacam2	M5	green	0.000536732	-0.0729193	-0.042158	0.021487	0.00595463	0.0216571	0.0675542
C1qb	M6	brown	-0.0196995	0.0225337	0.0756465	-0.0272048	0.0263658	-0.00369436	-0.00622013
Hal	M4	blue	-0.0610373	-0.0912819	-0.0644514	0.119428	0.0563999	0.0492441	0.0259207
Ccr2	M4	blue	-0.398329	-0.326919	0.0212357	0.611143	0.11038	0.19669	0.204833
Csf3r	M4	blue	-0.0208064	-0.306058	-0.270851	0.244874	0.123704	0.151781	0.246719
Pdgfa	M2	yellow	-0.0142912	-0.0881474	-0.0527159	0.0383982	-0.00439823	0.0422889	0.0649933
Klf5	M2	yellow	0.00416732	-0.114378	-0.124527	0.0582856	0.0640674	0.0887935	0.111518
Thbd	M1	turquoise	0.029185	-0.0247994	0.00497433	0.0879777	0.0607503	0.13057	0.0998264
Hmgn5	M1	turquoise	0.031429	-0.0907778	-0.0993335	0.0783193	0.0480842	0.0711263	0.11217
Gnb4	grey	grey	0.0180695	-0.0293925	-0.0205235	-0.000425493	-0.00397273	0.0230014	0.0443292
Ptprcap	M1	turquoise	0.00213889	-0.0464103	-0.0546824	0.0173736	0.135313	0.166084	0.0437145
Nlrp3	M2	yellow	-0.125044	-0.461356	-0.407049	0.301033	0.13713	0.103864	0.253721
Fosb	M2	yellow	-0.201133	-0.451469	-0.274541	0.356326	0.237851	0.134742	0.205689
Socs3	M3	red	0.00883618	-0.217482	-0.280923	0.144817	0.147943	0.103679	0.125569
Csrnp1	M3	red	-0.0875467	-0.425348	-0.462658	0.200361	0.209338	0.150539	0.208891
Kit	grey	grey	0.00357116	-0.0546511	-0.0724101	-0.0244113	0.0579846	0.0565116	0.0321541
Jag2	M5	green	-0.0121608	-0.0379978	-0.0388073	0.0378846	0.0624284	0.0843048	0.113983
Bcl2a1d	M1	turquoise	0.29267	0.0727851	-0.113032	-0.184108	-0.00772409	0.0351061	0.0335841
Kcnn4	M5	green	-0.0274335	-0.161146	-0.159836	0.0462901	0.14139	0.107927	0.0918132
Fcgr2b	M4	blue	-0.225269	-0.298147	-0.11069	0.331893	0.0720437	0.156058	0.179525
Ly75	M1	turquoise	0.037223	-0.0145518	-0.00915647	-0.0394296	-0.00374265	0.0135909	0.00165844
Nkg7	grey	grey	0.0320225	-0.00908994	0.0076228	0.0245464	0.0554321	0.0900952	0.0563429
Upb1	M6	brown	-0.0549823	-0.0418714	0.0264007	0.00599982	0.0535779	0.0881847	0.0583421
Cmtr1	M2	yellow	-0.116507	-0.305696	-0.239482	0.18915	0.103667	0.0677325	0.141467
Irf4	M1	turquoise	-0.00259995	-0.0674974	-0.0615077	0.0050073	0.0221971	0.0703324	0.0522339
Slbp	M1	turquoise	0.0124297	-0.0962631	-0.112338	0.0840131	0.0764275	0.0880783	0.143573
Gm8251	M2	yellow	-0.0104549	-0.102622	-0.0839454	0.0803045	-0.00134332	0.0215538	0.0964759
Ppp1r16b	M1	turquoise	0.0037025	-0.0611198	-0.0733731	-0.026776	0.0354243	0.0984533	0.0341778
Mmp8	M4	blue	-0.309592	-0.340836	-0.126711	0.452934	-0.0171323	-0.0286822	0.145548
Cyp51	M5	green	0.00381421	-0.0544085	-0.0795505	0.0351333	0.0876108	0.115105	0.0975748
Mgst1	M4	blue	-0.333741	-0.38677	-0.133307	0.597597	0.0222839	-0.0257749	0.183325
Nav2	M4	blue	-0.0717135	-0.0210473	0.0477166	0.0793834	-0.0162273	0.0142835	0.00424476
Slc20a1	M6	brown	-0.0614895	-0.0180133	0.056427	0.101096	0.0746008	0.190428	0.110427
Gatm	M4	blue	-0.267863	-0.289993	-0.0539751	0.427835	0.105722	0.0894065	0.125879
Dhfr	M5	green	-0.0267157	-0.0115127	0.00974651	-0.00108453	0.0309159	0.0785323	0.0849445
Tnni2	M1	turquoise	-0.0166219	-0.00423207	0.0415295	-0.00248212	0.0725344	0.0999426	0.131829
Maff	M2	yellow	-0.0578442	-0.255476	-0.247416	0.0924333	0.0920208	0.110962	0.12648
Nop2	M1	turquoise	-0.0256227	-0.0882589	-0.0860548	0.00727865	0.0590329	0.0362641	-0.010611
Slc7a14	M1	turquoise	0.0536178	0.0127569	0.00865597	-0.0106863	-0.0359169	-0.0265872	-0.0435331
Cd55	M6	brown	0.0483085	0.023926	0.0256107	-0.0271083	0.0542887	0.146693	0.0544854
Spp1	M2	yellow	0.0175255	-0.101905	-0.0948735	0.043201	-0.0187552	0.0488752	0.0766257
Maged1	M4	blue	-0.0954174	-0.0987409	-0.0338428	0.144111	0.0451663	0.0377317	0.101649
Gm44751	M6	brown	-0.0292698	-0.0129159	0.0328965	0.116917	0.048307	0.160935	0.0651306
Cxcl16	M6	brown	-0.0257254	-0.130986	-0.0968637	0.0182577	0.074549	0.0926845	0.105975
Actn1	M2	yellow	0.00766796	-0.122616	-0.114861	0.0218262	0.0138548	0.0621348	0.0322017
Tagap	grey	grey	0.016673	-0.0395748	0.00702314	-0.00385259	0.0294835	0.0945628	0.155677
Cebpd	M6	brown	-0.100777	-0.114479	-0.0418127	0.243724	0.0991532	0.160803	0.0792966
Rasgef1b	M1	turquoise	-0.0137429	-0.135259	-0.181407	0.0331718	0.0599912	0.12099	0.0989531
Sell	M4	blue	-0.323316	-0.399599	-0.172679	0.505974	0.0125558	0.0625325	0.148039
Txndc17	M4	blue	-0.0515722	-0.13986	-0.0929447	0.200625	0.079073	0.113893	0.0998339
Ace	M1	turquoise	0.650181	0.346154	-0.0426162	-0.415766	0.025138	-0.0137279	0.0309423
Crem	M3	red	-0.125131	-0.384784	-0.394063	0.249842	0.107772	0.00725616	0.123249
Gpr171	M2	yellow	-0.0579873	-0.123529	-0.0879127	0.0352289	0.108204	0.137142	0.094848
Eno3	M1	turquoise	0.539488	0.266741	-0.0249008	-0.315842	0.021249	0.00848753	0.0105715
Lilr4b	M2	yellow	-0.1456	-0.379153	-0.264684	0.309646	0.14491	0.181838	0.129685
Selp	M2	yellow	-0.0681094	-0.141999	-0.11679	0.107111	-0.0101497	-0.0150211	0.00292164
Smad7	M1	turquoise	0.0107051	-0.0883168	-0.0698678	0.0351833	0.123123	0.0602716	0.126154
Zfp36l1	M1	turquoise	0.280439	0.00151577	-0.166823	-0.105331	0.0705688	0.0642066	0.0674129
Pak1	grey	grey	-0.0465158	-0.141809	-0.0914666	0.102499	0.135896	0.14213	0.265598
Aif1	M4	blue	-0.116244	-0.121944	0.00508185	0.266673	0.180864	0.306292	0.173302
Ramp1	M4	blue	-0.139444	-0.206224	-0.0948613	0.193545	0.133206	0.114976	0.181853
Tent5a	M1	turquoise	0.318896	0.110323	-0.0507804	-0.102411	0.040946	0.0641694	0.0284445
Slc12a2	M1	turquoise	0.447005	0.243043	-0.0570825	-0.309603	-0.0330124	-0.0265442	0.0147071
Plekhg2	M2	yellow	-0.10399	-0.15806	-0.124152	0.0883069	0.0275506	0.00640661	0.075613
Cd180	M1	turquoise	0.032733	0.0622242	0.0774749	-0.00923016	-0.0479441	0.0135708	0.0742289
Flt3	M2	yellow	-0.0952217	-0.150169	-0.0892785	0.0478804	0.0785955	0.0840542	0.111063
Trem1	M3	red	0.0694217	-0.169556	-0.378731	0.0895037	-0.00514934	-0.0930326	0.0676885
Dusp16	M1	turquoise	0.512318	0.218017	-0.1421	-0.331194	-0.0600023	-0.10222	0.0570493
H2-Oa	M2	yellow	-0.0102974	-0.13366	-0.137315	-0.00461329	0.0737575	0.0732464	0.0363246
Slc5a5	M1	turquoise	0.0840893	0.038769	-0.0270601	-0.0499781	0.0567629	0.018005	-0.042844
Zfp651	M2	yellow	-0.0484642	-0.0762842	-0.0271194	0.063398	0.0234927	-0.0225341	0.0794379
Tiparp	M2	yellow	-0.141409	-0.331579	-0.254005	0.263573	0.147273	0.0306161	0.175862
Apoc1	M4	blue	-0.155781	-0.160492	-0.0748742	0.239562	-0.114605	-0.0521149	0.00239813
Cfh	M4	blue	-0.162516	-0.221496	-0.0998376	0.290389	0.0454809	0.0347082	0.130911
Bcl2l11	M2	yellow	-0.198439	-0.379849	-0.295531	0.285027	0.0819514	0.0551838	0.101546
Hp	M4	blue	-0.313262	-0.426801	-0.156562	0.598339	0.0862348	0.0796027	0.125563
Cyp4f18	M1	turquoise	0.340839	0.0783939	-0.138306	-0.165105	0.0190492	0.00543239	0.0153039
Arrdc4	M4	blue	-0.0963713	-0.167209	-0.106544	0.227359	0.0473794	0.0941476	0.124157
Pglyrp1	M1	turquoise	0.584541	0.270202	-0.0230996	-0.269473	-0.0116263	-0.089343	-0.00639758
Idi1	M5	green	-0.0522565	-0.0524509	-0.0398459	0.0804508	0.193986	0.12768	0.131286
Sinhcaf	M1	turquoise	0.0226453	-0.0268769	-0.0169609	0.0116209	-0.0146709	0.018995	0.0134285
Gabarapl1	M1	turquoise	-0.0413439	-0.162353	-0.149797	0.0801827	0.0701859	0.0674452	0.123902
Nrg1	M2	yellow	-0.107129	-0.183004	-0.110372	0.189806	0.0367833	-0.0024967	0.0810529
Epsti1	M4	blue	0.00208549	-0.0520573	-0.0266998	0.0339995	0.0217304	0.043004	0.036551
Nfkbiz	M1	turquoise	0.0856002	-0.200789	-0.2294	0.11819	0.123663	0.135928	0.129394
H2-M2	M6	brown	0.00391663	-0.00858864	0.00142483	-0.0336203	-0.00544774	-0.00318863	0.0210989
Steap4	M1	turquoise	0.0364682	-0.072385	-0.0946142	0.010066	0.00247328	0.0673608	0.0089978
Ncr1	M6	brown	0.0283707	-0.0136511	0.00476484	0.0515575	0.0390402	0.0461651	0.0258144
Tubb3	M1	turquoise	0.0149779	-0.020785	-0.0591414	-0.0143969	0.00768307	0.0355755	0.065805
Il18rap	M6	brown	0.0189286	-0.0551832	-0.0340516	0.0598249	0.0801929	0.08947	0.0332403
Necap1	grey	grey	-0.059009	-0.0700423	0.00224706	0.116459	0.0620907	0.0836101	-0.020428
Phlda1	M2	yellow	-0.00937196	-0.192099	-0.202743	0.090344	0.0956353	0.0750659	0.100389
Plp2	M4	blue	-0.0786508	-0.15843	-0.101729	0.158485	0.123512	0.155898	0.166794
Gm9530	M5	green	0.0113241	-0.0413569	-0.0140599	-0.0124588	0.0521576	0.0226529	0.0405449
Lag3	M5	green	-0.0265501	-0.0307379	-0.0323691	0.00709676	0.0345113	0.0626141	0.0427272
Gm3336	M6	brown	-0.0236328	0.0297625	0.067149	0.0260265	0.089795	0.0490417	0.0341114
Prune2	grey	grey	0.00338627	-0.0404457	-0.0516324	0.0360905	0.0144436	-0.0185228	-0.0047569
S100a11	M4	blue	-0.171505	-0.416715	-0.193151	0.583632	0.212363	0.146017	0.279967
Csf3	grey	grey	0.0181315	-0.0894354	-0.107564	0.0342669	0.0414243	0.0106999	0.0581223
Tcf4	grey	grey	-0.0893923	-0.176889	-0.133959	0.154269	0.0714619	0.106878	0.191353
Mad2l1bp	M1	turquoise	0.0357799	0.00148217	0.00826063	0.0720606	0.0951828	0.102041	0.0771065
Ms4a4c	M4	blue	-0.314895	-0.339551	-0.0807168	0.555237	0.105029	0.161452	0.159469
Cited2	M4	blue	-0.081336	-0.162698	-0.118502	0.231222	0.0653178	0.108294	0.144994
Hba-a2	M6	brown	-0.0071997	-0.0309612	-0.0177534	0.0220501	0.0425431	0.0609363	0.0528087
Plxnc1	M1	turquoise	0.0971362	-0.0225075	-0.059604	-0.0355829	0.0904339	0.0648429	0.0726687
Sned1	M1	turquoise	0.110772	-0.0605752	-0.118566	-0.0381836	0.0971893	0.0605489	0.103167
Fscn1	M6	brown	0.0127903	-0.0144878	-0.00511677	-0.0287035	-0.00687347	-0.00312812	0.0109583
Itga1	M4	blue	-0.174318	-0.202928	-0.0733817	0.261182	-0.0410764	-0.0194978	0.107654
Igf2r	M1	turquoise	0.0799032	0.0360401	0.00949768	-0.0296368	-0.039084	-0.000732087	0.0280598
Tppp3	M5	green	0.167873	-0.0633411	-0.0892421	0.119607	0.183111	0.0298973	0.088553
H2-T22	grey	grey	-0.0156249	-0.0553354	-0.0294198	0.0316208	0.00747695	0.0392065	0.0455009
Slc37a2	M2	yellow	-0.0673743	-0.138879	-0.137764	0.0976971	0.0706377	0.0565706	0.0743785
Cdkn2aip	grey	grey	-0.0262037	-0.0359675	0.018513	0.0686686	0.0577131	0.134433	0.13926
Dok1	M6	brown	0.107582	0.0836513	0.0899073	-0.021248	0.0105199	0.102052	0.0583219
Cks2	M1	turquoise	0.159321	-0.001918	-0.141795	-0.0533558	0.0191115	0.019899	-0.037803
Fam129c	M6	brown	-0.0124351	-0.071109	-0.067437	0.0371606	0.0731946	0.110862	0.0416031
Ctsg	M4	blue	-0.0399854	-0.0547801	-0.00656471	0.0947286	0.0196177	0.0089704	0.0561363
Ly86	M6	brown	-0.148523	-0.131983	0.0300782	0.272382	0.145107	0.220275	0.147012
Lif	M2	yellow	-0.0815075	-0.161423	-0.121419	0.101514	-0.00875664	-0.0245475	0.0986667
Mirt1	M1	turquoise	0.157964	-0.0545508	-0.155265	-0.0447031	0.0414231	0.0646489	0.116481
Cenpa	M4	blue	-0.153755	-0.203134	-0.133038	0.16716	0.0459679	0.0380462	0.169032
Ahr	M4	blue	-0.234215	-0.240753	-0.0555476	0.283733	0.1347	0.128373	0.0870131
Ap5s1	M4	blue	-0.0856055	-0.0944943	-0.0351899	0.192011	0.0175426	0.0960469	0.0583832
Ly6a	M6	brown	-0.0142544	0.0149258	0.0396497	0.0252864	0.00394884	0.0801167	0.0471788
Dnajb1	M1	turquoise	0.0978201	0.0423957	0.0318376	-0.0109208	0.133727	0.204821	0.132137
Resf1	M1	turquoise	0.166637	-0.064653	-0.175238	-0.00677476	0.136461	0.143099	0.125347
Uck2	M2	yellow	-0.216601	-0.355592	-0.209573	0.275407	0.017654	0.0202536	0.128818
Ramp3	M2	yellow	-0.0522233	-0.138605	-0.118892	0.034294	0.0490709	0.0693246	0.0818847
Tmem123	grey	grey	-0.00313821	-0.149183	-0.129766	0.0813599	0.0900457	0.110592	0.172163
Pecam1	M1	turquoise	0.237396	0.106916	-0.0431405	-0.172952	-0.0289417	-0.0450371	-0.0626599
H2-Ob	M1	turquoise	0.0239601	-0.0380854	-0.038778	-0.0149647	0.0896652	0.0633747	0.05708
1200007C13Rik	M6	brown	-0.0364441	0.048593	0.0903596	0.0537094	-0.0250517	0.0375405	-0.033525
Oaf	M6	brown	-0.0216853	-1.91341e-05	-0.014797	0.0363814	0.0150558	0.0183673	0.104637
Klf2	M1	turquoise	0.29069	0.0702405	0.115476	0.0667615	0.214147	0.313749	0.0914908
Epha2	M2	yellow	-0.0496556	-0.108659	-0.103637	0.0316361	0.0186622	0.0347666	0.0424115
Fth1	M2	yellow	-0.149564	-0.56437	-0.400643	0.576239	0.272448	0.202845	0.286191
Ptafr	M2	yellow	-0.122115	-0.394684	-0.333175	0.252732	0.146656	0.0997023	0.17746
Hopx	M4	blue	-0.249496	-0.279081	-0.102343	0.476477	0.0850544	0.0326381	0.163097
Klrb1b	M5	green	-0.0124596	-0.0734556	-0.0369698	0.0352187	0.0479827	0.0946468	0.134987
Fosl1	M1	turquoise	-0.0247283	-0.10095	-0.104395	0.0398986	0.039916	-0.0223908	0.010426
Pmaip1	M1	turquoise	0.104279	0.0400435	0.00733385	-0.0159855	0.0463733	0.179124	0.0427543
Oasl2	M4	blue	-0.0108977	-0.101792	-0.0580704	0.121345	0.119988	0.166599	0.121652
Tmem156	M6	brown	0.000984355	-0.0444037	-0.00941175	0.0972532	0.0250152	0.113062	0.0727684
Zc3h12a	M2	yellow	-0.0233238	-0.23493	-0.2202	0.0953547	0.0671703	0.0981021	0.0883463
Klf4	M2	yellow	0.108296	-0.218682	-0.166956	0.211232	0.226067	0.181361	0.198278
Impdh1	M4	blue	-0.0369904	-0.0892901	-0.0742765	0.0532417	0.126261	0.0409462	0.0573882
Ms4a6d	M4	blue	-0.20306	-0.23372	-0.0764272	0.455792	0.151819	0.205642	0.249728
Zmynd15	M6	brown	0.000155711	-0.00150665	0.0213418	-0.0226278	0.0046342	0.0128813	0.00997911
Hist1h1c	M3	red	-0.00850008	-0.204074	-0.251949	0.120128	0.0409024	0.0138754	0.118935
Elmod2	M4	blue	-0.0751494	-0.107693	-0.055568	0.110784	-0.0426158	-0.00270624	-0.0191884
Hbb-bt	M5	green	-0.0328125	-0.0777475	-0.0713337	0.0297006	0.0631721	0.0715722	0.0415478
Lyz2	M4	blue	-0.235357	-0.411522	-0.121113	0.71557	0.19176	0.21297	0.220362
Runx3	M2	yellow	-0.0989265	-0.349071	-0.295422	0.210248	0.209251	0.15816	0.211243
Slfn5	M4	blue	-0.224313	-0.147122	0.029262	0.323647	0.0575552	0.149654	0.0907346
Stat4	M1	turquoise	-0.00923091	-0.121481	-0.146631	0.0244115	0.0623676	0.0748791	0.0441558
Enc1	M1	turquoise	0.0107152	-0.014441	-0.0193547	-0.0293791	-0.0114626	0.00526723	-0.015584
Tmx4	M2	yellow	-0.0665923	-0.159045	-0.120352	0.203505	0.0984307	0.0719847	0.0824954
Cd72	M1	turquoise	0.0590342	0.00960767	-0.0271004	-0.0375001	0.073051	0.0972054	0.0207345
Nt5e	M2	yellow	-0.0508785	-0.150238	-0.127317	0.063809	0.0108012	0.0271071	0.0487899
Sgms2	M2	yellow	-0.225265	-0.425561	-0.30218	0.393079	0.115476	-0.0667835	0.146294
Bex3	M6	brown	-0.0253332	-0.0879353	-0.049486	0.0624067	0.107223	0.156945	0.126421
Ccnf	M1	turquoise	0.00140386	-0.0154868	-0.0466712	0.0243027	-0.0156825	-0.014516	0.0935441
Scd1	M1	turquoise	0.0430203	-0.00330878	-0.0508684	0.00129703	0.108266	0.114347	0.0283034
Lilra5	M1	turquoise	0.458948	0.291249	0.0186855	-0.325763	-0.0963555	-0.0460692	-0.0327262
Fchsd2	M1	turquoise	0.0177002	-0.0514571	-0.0428117	0.0420125	0.095353	0.14528	0.114451
Dennd4a	M3	red	-0.0891348	-0.345172	-0.362774	0.176753	0.171402	0.138113	0.207528
Ets1	M1	turquoise	0.318564	0.133269	-0.0773042	-0.217814	0.014463	0.013482	-0.0363796
Trem2	M4	blue	-0.129711	-0.200242	-0.103551	0.330082	0.117947	0.090494	0.115218
Bhlhe40	M1	turquoise	0.24762	-0.0129764	-0.18778	-0.114359	0.137568	0.083074	0.166183
Zfp296	M1	turquoise	0.108807	0.0682931	0.0190675	-0.0556943	-0.0118729	0.0355021	0.021164
1700025G04Rik	M2	yellow	-0.0947891	-0.153674	-0.0891104	0.126974	0.102029	0.140632	0.164142
Kcnj2	M6	brown	0.0165827	-0.0225842	0.00581363	0.0632465	0.0567112	0.126481	0.0598585
Prdx6	M4	blue	-0.0407109	-0.396423	-0.284923	0.379401	0.12839	0.0831	0.209439
Gda	M4	blue	-0.335318	-0.441258	-0.192215	0.598191	0.0696065	0.0685698	0.156563
Ctsc	M4	blue	-0.249033	-0.359129	-0.0855174	0.508218	0.13863	0.226637	0.175661
F10	M4	blue	-0.164485	-0.18404	-0.0553903	0.335223	0.072844	0.156505	0.144492
Pvr	M3	red	-0.0487151	-0.248854	-0.261436	0.107414	0.0738401	0.0938016	0.0910653
Trbc1	grey	grey	0.0354287	-0.0279327	0.0103055	0.0440584	0.0618776	0.045002	0.0423283
Ldlr	M5	green	-0.0981156	-0.15553	-0.117472	0.185728	0.192917	0.111217	0.100999
Tgfbi	M4	blue	-0.264888	-0.442619	-0.16988	0.591779	0.210443	0.214845	0.212283
Arrdc3	M3	red	0.0946076	-0.105271	-0.223916	0.0495539	0.0408131	-0.0236667	0.129986
Anxa1	M4	blue	-0.107943	-0.397985	-0.200641	0.478336	0.223468	0.121292	0.127104
Cep41	grey	grey	-0.0245607	-0.0737311	-0.0657393	0.0576119	0.0734078	0.0711825	0.00289705
Zbtb20	M1	turquoise	0.039639	-0.0612747	-0.0459395	0.0282698	0.0447878	0.0431848	0.054302
C3	M4	blue	-0.332945	-0.334941	-0.0896677	0.55167	0.0937919	0.0697513	0.197926
Fbxl5	M6	brown	-0.0779603	-0.137937	-0.0294456	0.264106	0.105287	0.14744	0.0989467
Rtp4	M6	brown	-0.0404218	-0.023408	0.0175897	0.04869	0.0633594	0.136124	0.0647948
Ciita	M6	brown	-0.044011	-0.0414973	0.0192534	0.035822	0.187565	0.242857	0.111475
Nedd4	M6	brown	-0.010238	-0.070142	-0.0446617	0.0103399	0.0718836	0.0487127	0.0451972
Dhrs3	M5	green	-0.0435249	-0.102062	-0.0380465	0.0563725	0.0702663	0.100727	0.0445716
AI463229	M4	blue	-0.0593686	-0.0638121	-0.00545202	0.108325	0.0601359	0.0679291	0.0230886
Chil1	M4	blue	-0.204807	-0.259613	-0.113231	0.383175	0.1029	0.0573219	0.10116
Rgs2	M6	brown	0.149851	-0.0642467	0.0358052	0.175551	0.152609	0.235458	0.143877
Marveld1	M4	blue	-0.0511624	-0.112312	-0.0506929	0.0821979	0.0823568	0.0826193	0.129124
Lair1	M1	turquoise	0.473617	0.228145	-0.0238888	-0.2813	-0.0521695	-0.0389209	0.00198837
Rnasel	M4	blue	-0.192824	-0.268038	-0.124285	0.263793	0.107301	0.0099651	0.105258
Prtn3	M4	blue	-0.247624	-0.268049	-0.0817573	0.415513	0.0739095	0.0460428	0.138638
Pdpn	M5	green	-0.0393591	-0.0996322	-0.0717253	0.0468009	0.00402302	0.0749652	0.0197956
Gcnt2	M1	turquoise	0.142872	-0.029041	-0.078718	-0.0267899	0.0161648	0.0570259	0.0650066
Pde3b	M3	red	0.0391889	-0.0999776	-0.200074	0.0426509	0.0253057	0.0483294	0.124042
Iqcn	M2	yellow	-0.06188	-0.0784351	-0.0692616	0.0428559	0.0111173	-0.0315777	0.0773692
Vmn2r96	M1	turquoise	0.0571753	0.0114969	-0.0438629	0.00117241	0.0295907	0.0456028	0.0693845
Cd163	grey	grey	-0.0110668	-0.0348107	0.0217653	0.0353991	0.00838107	-0.00199019	0.0449453
Pou2af1	M1	turquoise	0.0269971	-0.051287	-0.0714484	-0.00797732	0.093498	0.127946	0.0253962
Ltb	M6	brown	0.115682	-0.0336803	-0.0267344	0.0637803	0.183506	0.200394	0.109165
Ctdspl	M2	yellow	-0.174966	-0.206267	-0.0838936	0.254006	0.0283935	-0.0188074	0.106335
Jaml	M6	brown	-0.140521	-0.180677	-0.063426	0.338099	0.0483201	0.0979888	0.141838
Ppp1r15a	M6	brown	-0.0657337	-0.131444	-0.0693899	0.241181	0.150027	0.354232	0.172263
Ocstamp	M5	green	-0.0155079	-0.0986605	-0.0636873	0.0383161	0.0393447	0.0721239	0.0560789
Hpgds	M6	brown	-0.0166603	-0.0304004	0.0283561	-0.0150434	0.080944	0.0138896	0.0539627
Lamb3	M1	turquoise	0.0996699	-0.00422897	-0.0784239	-0.0139026	0.051661	0.0950888	0.0657713
Slc35b2	M2	yellow	-0.13485	-0.352506	-0.294285	0.267361	0.114617	0.0144312	0.110531
Cep162	M1	turquoise	0.0266577	-0.0252615	-0.0265008	0.0207174	-0.000122513	0.0349167	0.0283102
Cttnbp2nl	M2	yellow	-0.0719174	-0.144828	-0.0741353	0.0815196	0.0575233	0.0683494	0.107474
Stat1	M1	turquoise	0.0561813	0.00196661	-0.0122223	0.0783703	0.0816638	0.112985	0.0238871
Tulp4	M1	turquoise	0.0794627	-0.0316106	-0.0744019	-0.00667513	0.0774836	0.0567643	0.133109
Gm26532	M1	turquoise	0.0628974	-0.126718	-0.222731	0.00605916	0.0689891	0.0622787	0.141045
Grina	M1	turquoise	0.00485715	-0.219951	-0.246796	0.189016	0.150911	0.121032	0.172546
Terf2ip	M5	green	-0.0386707	0.0202848	0.00956799	0.0348415	0.104276	0.00458174	0.00361647
Hspb1	M5	green	-0.0226757	0.0199564	0.0399168	-0.0326238	-0.0309201	0.00259135	-0.0198929
Gem	M6	brown	0.0122675	0.0239414	0.050345	0.0155485	0.0727377	0.108303	0.00737968
Gm49767	M1	turquoise	0.0477918	-0.00379216	-0.0426269	0.00378282	0.0104668	0.0872986	0.0739704
Glrx	M4	blue	-0.16839	-0.338027	-0.226168	0.339927	0.0936655	0.123529	0.21629
Tnfaip2	M2	yellow	-0.0909126	-0.330727	-0.26783	0.258697	0.171198	0.18057	0.195625
Pmvk	M6	brown	-0.00178068	-0.0635542	-0.080539	0.0484502	0.10291	0.138209	0.12427
Gm26917	M6	brown	-0.193316	-0.15066	-0.0355479	0.0451172	-0.000690444	-0.00932834	-0.0204285
Gm34455	M1	turquoise	0.107083	-0.00167296	-0.0781353	-0.069908	-0.0115185	-0.0253388	0.074873
Slc25a4	M4	blue	-0.188167	-0.252531	-0.0809614	0.342367	0.142094	0.140294	0.217211
Ell2	M3	red	0.0328125	-0.271945	-0.355972	0.113818	0.0903775	0.0792478	0.117521
Pdp2	M1	turquoise	0.0272909	-0.0106095	-0.00796178	0.00936696	0.0165167	0.0292883	0.0745033
Naga	M1	turquoise	0.129582	0.0288839	-0.0110401	-0.0128987	0.0941798	0.16481	0.094349
Btg2	M1	turquoise	0.139108	-0.207237	-0.223546	0.174308	0.250632	0.244251	0.212919
Plac8	M4	blue	-0.0508916	-0.334267	-0.163924	0.555256	0.250419	0.232332	0.250103
Ccr5	M2	yellow	-0.204605	-0.343893	-0.178473	0.281855	0.109342	0.042575	0.130572
Sod1	M3	red	-0.0520918	-0.149711	-0.114651	0.123883	0.078365	0.109404	0.0862326
F11r	M5	green	-0.0588251	-0.124753	-0.0513233	0.0950433	0.0852743	0.0896095	0.0498033
Dyrk3	M6	brown	-0.0765474	-0.0267349	0.0406189	0.091558	-0.00502004	0.0432679	0.0479875
Cdk20	grey	grey	-0.0185136	-0.0771945	-0.056846	0.0804579	0.0105125	0.0227964	0.090202
Laptm4b	M1	turquoise	0.0617973	0.0192606	0.00190283	-0.051249	-0.0349283	-0.0102819	-0.0154782
Vwa5a	M4	blue	-0.0813977	-0.163855	-0.0972533	0.202381	0.0601675	0.0788128	0.103245
Clec4n	M2	yellow	-0.0694537	-0.21609	-0.176658	0.172165	0.0754737	0.0957819	0.0715827
Sh3pxd2b	M2	yellow	-0.0601422	-0.212514	-0.175056	0.0957987	0.0309813	0.0403416	0.106474
Klf6	M6	brown	0.101213	-0.175444	-0.0436557	0.166617	0.163037	0.152868	0.105221
Bcl7a	M6	brown	0.00233584	-0.0580429	-0.0386213	0.0338694	0.073732	0.138505	0.0437862
Arg2	M2	yellow	-0.0535524	-0.272932	-0.255974	0.163591	0.0311395	0.0120668	0.113551
Hnrnpll	M4	blue	-0.203957	-0.2324	-0.0542394	0.302222	0.0406416	0.146275	0.167405
Pxdc1	M5	green	-0.0140834	-0.078301	-0.0946322	-0.00843758	0.0717487	0.10754	0.0996953
A930029G22Rik	M1	turquoise	-0.0181686	0.0256815	0.0491641	0.0083295	-0.0207312	0.0138259	0.0268188
Nupr1	M1	turquoise	0.233563	0.111314	-0.0387539	-0.061073	0.0378534	0.0595493	0.0531018
Dpep2	M1	turquoise	-0.0101382	-0.0732833	-0.0278722	0.0762603	0.039047	-0.0347218	0.0318621
Itgax	M1	turquoise	0.38254	0.171231	-0.0525931	-0.295025	-0.0167596	0.00919479	0.00950553
Spn	M1	turquoise	0.559107	0.312791	-0.0163675	-0.352563	0.0593823	-0.048655	-0.0266387
Adrb2	M1	turquoise	0.169548	0.000184593	-0.10343	-0.0601091	0.0947137	0.108594	0.0279573
Slamf9	M1	turquoise	0.0868423	0.0392686	0.0244579	-0.0434339	0.00737527	0.0384333	0.0190051
Arap2	M1	turquoise	0.0623908	-0.0138085	-0.0608234	-0.0437404	0.0197837	0.0726711	0.044697
Rasgrp1	M1	turquoise	0.183144	0.0974466	-0.0103424	-0.130974	0.00844367	0.00224447	0.024605
Sbno2	grey	grey	-0.0709676	-0.216409	-0.192747	0.171091	0.0744449	0.0745722	0.057945
Csf2rb	M4	blue	-0.193796	-0.316806	-0.189224	0.356099	0.155555	0.158475	0.224744
Gm5150	M4	blue	-0.0814085	-0.199621	-0.148179	0.317034	0.119389	0.155349	0.156809
Fos	M6	brown	-0.0155203	-0.288982	-0.0914385	0.374614	0.162159	0.265016	0.209751
Serpinb6a	M1	turquoise	0.273705	0.163314	0.0249274	-0.180793	-0.0784328	-0.0405612	-0.0146574
AI504432	M2	yellow	-0.202076	-0.38307	-0.265674	0.287661	0.0253841	0.00590738	0.148266
Akap17b	grey	grey	0.00530001	-0.0396408	-0.0467954	0.00373092	0.0668021	0.0897344	0.00337179
Cetn4	M2	yellow	-0.00200891	-0.0735919	-0.0395534	0.0312908	-0.00333789	-0.00555308	0.0462161
Rhoc	M5	green	0.0164531	-0.050473	-0.0504921	-0.0285041	0.00444373	0.0220777	0.043777
C130013H08Rik	grey	grey	0.0463984	0.000225924	-0.00222647	0.020408	0.0704034	0.048264	0.138516
Prf1	M5	green	-0.0155875	-0.0503119	-0.0442361	0.00778151	0.0231989	0.049271	0.0225409
Trim7	M1	turquoise	0.0587298	-0.00271808	-0.00855741	-0.025179	0.0085844	0.0305006	0.0237955
Il2rb	M6	brown	-0.00519456	-0.0209909	0.00491469	0.063625	0.0563535	0.0263365	0.022118
Zfp438	M1	turquoise	-0.0184536	-0.0657475	-0.0675742	-0.0230424	0.0240493	0.0423123	0.0416417
Ipmk	grey	grey	-0.0375857	-0.142554	-0.126227	0.183108	0.0288995	-0.00136563	0.101706
Gpr137c	M1	turquoise	-0.000723189	0.0095399	-0.0237333	0.0253417	0.0616139	0.131225	0.0865605
Als2	M6	brown	-0.040782	-0.0354744	0.0365126	0.0612264	0.00767447	0.0678439	0.0281097
Irf1	M1	turquoise	0.190032	0.0872865	-0.0178183	-0.0363076	0.0567177	0.135155	0.0438586
Capg	M4	blue	-0.294102	-0.270761	-0.0607842	0.489201	0.126272	0.20355	0.20613
Ece1	grey	grey	-0.0684882	-0.109161	-0.0457119	0.121186	0.11232	0.146543	0.228704
Mtss1	M1	turquoise	0.155575	-0.00580471	-0.0831729	-0.0946101	-0.00278946	0.0993642	0.0873082
Cpne8	grey	grey	-0.00434199	-0.0283354	-0.0182293	0.0134816	0.0234	0.011456	0.00851791
Hist1h1b	grey	grey	-0.0325441	-0.0390523	-0.00534722	0.0793317	-0.00983946	-0.00446584	0.101223
Paf1	M3	red	-0.03874	-0.146681	-0.171859	0.0936083	0.0515785	0.0804932	0.118698
Icosl	M2	yellow	-0.00686472	-0.145185	-0.114488	0.0362937	0.088906	0.0396607	0.0984369
Dennd5b	M2	yellow	-0.0754298	-0.108699	-0.0841226	0.076622	0.0589549	0.0188152	-0.0152595
Il15ra	M6	brown	0.0107523	-0.040499	-0.0386929	-0.00537311	-0.00687059	-0.00336772	0.0165784
Nccrp1	M1	turquoise	0.0426714	-0.0189507	-0.0298864	-0.0178586	0.019379	0.0281882	0.0370654
Gpr146	M2	yellow	-0.097332	-0.14217	-0.0704876	0.140797	0.0606123	0.0516961	0.0409173
F730043M19Rik	M5	green	0.031692	0.0147511	0.0391042	0.00380303	0.134153	0.01381	0.0155572
Hspe1	M4	blue	-0.158681	-0.191479	-0.0772336	0.349892	0.203887	0.25922	0.187661
Txnrd1	M3	red	0.040353	-0.318047	-0.439003	0.116941	0.150472	0.0520931	0.127962
Terf2	M6	brown	-0.0199101	-0.00603405	0.0244072	0.0370543	0.00570438	0.0759659	0.00257223
Ngp	M6	brown	-0.0362355	-0.0374303	0.0172254	0.0622741	-0.0220933	0.0102487	0.057433
H2afz	M4	blue	-0.223038	-0.473275	-0.213771	0.625267	0.25746	0.247877	0.303165
Sag	M5	green	-0.0387345	-0.0833202	-0.0793134	0.0147441	0.0150954	0.0306026	0.0172341
Rps27l	M4	blue	-0.233351	-0.315706	-0.165059	0.505447	0.239509	0.225598	0.283837
Cmah	M1	turquoise	0.0872605	-0.00846891	-0.046888	-0.0629513	0.0929813	0.109041	0.0244233
Cyfip2	M1	turquoise	0.344983	0.10537	-0.108798	-0.181529	-0.0296453	0.0381933	0.0486952
Bag3	M1	turquoise	0.002892	-0.00803258	0.00256257	0.0653044	-0.00952779	0.0922902	0.0773271
Gpr183	M4	blue	-0.106435	-0.139103	-0.0629627	0.102212	0.0175952	0.12775	0.171639
Ppa1	grey	grey	5.00891e-05	-0.0570488	-0.0710506	0.0807236	0.0328659	0.0945274	0.178657
Gdf15	M5	green	0.00208134	-0.0272118	0.00219421	0.0243235	0.0518778	0.0569932	0.068497
Rhbdd3	M1	turquoise	0.0287884	-0.014114	-0.0381095	0.00901803	0.00946076	0.0354354	-0.0347992
Phf21b	M1	turquoise	0.0961922	0.0750835	0.0607205	-0.0710532	-0.0373257	-0.0266361	-0.0163707
Srpk3	M6	brown	0.0143111	-0.0447678	-0.0592365	-0.00938665	0.0741376	0.116084	-0.000598098
Hist1h2bc	M4	blue	-0.0315881	-0.194688	-0.185512	0.0990118	0.0793129	0.109906	0.0922694
H1f0	grey	grey	-0.029371	-0.0519317	-0.0550257	0.0996212	-0.00146808	0.129808	0.160464
Fmnl2	M5	green	-0.000982847	-0.0442142	-0.00231166	-0.00122905	0.0865329	0.0881005	0.0653323
Gbp2	M3	red	-0.00450042	-0.0508657	-0.0474351	0.0654016	-0.00230409	0.0280235	0.0257195
Tent5c	M1	turquoise	0.0222844	-0.0794383	-0.0685142	0.0127872	0.0553234	0.00618665	0.0671228
Krt80	M1	turquoise	0.338685	0.144094	-0.0551486	-0.1706	0.0250617	0.076963	0.0280987
Pdgfb	M1	turquoise	0.191296	0.132992	0.0275749	-0.150242	0.0385952	0.0470127	0.0330316
Serpine1	M5	green	-0.00248793	-0.00643728	0.00041097	0.016538	0.0856606	0.066099	0.0829465
Adam8	M2	yellow	-0.150439	-0.402276	-0.292469	0.245543	0.0937257	0.061655	0.204181
Scd2	M1	turquoise	0.0294135	-0.0133847	-0.0274073	0.0376334	0.157588	0.0638989	0.125841
Cenpc1	grey	grey	-0.0427234	-0.113584	-0.0680232	0.127796	0.0268936	0.0476885	0.0843193
Itpkb	M1	turquoise	-0.118102	-0.194925	-0.150661	0.205091	0.0840303	0.118625	0.127613
Hspbap1	M6	brown	-0.0697116	0.00189752	0.0618892	0.0553171	0.045219	0.0880891	-0.00268262
Tspan33	M6	brown	-0.0356243	-0.0761302	-0.0215771	0.072131	0.10737	0.085537	0.0416295
Txnip	M6	brown	0.054125	0.1128	0.168699	0.129175	0.082955	0.31018	0.13139
Twf1	M4	blue	-0.0461913	-0.098442	-0.0407622	0.156809	0.048509	0.0896888	0.156209
Clec1a	M3	red	-0.0480226	-0.0760412	-0.0643415	0.0259425	0.0353075	0.0331941	0.043279
Olr1	M3	red	-0.0164978	-0.0703731	-0.120905	0.0163246	0.0489126	-0.0693139	-0.0467609
Celf4	M6	brown	0.0539697	-0.00239872	-0.0244376	0.0327803	0.0735458	0.121192	0.0821641
Treml4	M1	turquoise	0.469466	0.208657	-0.0321917	-0.217887	0.0187347	0.0474311	0.0127839
Tes	M3	red	0.105849	-0.144701	-0.248062	0.0136377	0.125281	0.0399627	0.0593579
Ccl6	M4	blue	-0.0446922	-0.292714	-0.0949198	0.476621	0.169447	0.197184	0.233779
Igfbp4	M6	brown	-0.0900805	-0.0544206	0.0409301	0.180426	0.0117032	0.0506855	0.045202
Klrk1	M2	yellow	-0.0622572	-0.130233	-0.0684201	0.0957422	0.10895	0.131434	0.150766
Rasa2	M5	green	0.0420741	-0.067315	-0.0632007	0.0333046	0.0750953	0.0325414	0.0637356
Dpp4	M1	turquoise	0.0418578	-0.0891613	-0.0949895	-0.0324069	0.106566	0.128741	0.132583
Slc25a33	M1	turquoise	0.0683024	-0.162344	-0.249546	-0.010586	0.0525463	0.028021	0.090119
Sema4c	M6	brown	0.00134405	-0.0339658	-0.00586341	0.0100509	0.00879394	0.0279685	-0.00117847
Gm43259	M5	green	-0.0181138	-0.0536763	-0.0848101	0.00647981	0.0880639	0.0530487	-0.0384448
Ndnf	M1	turquoise	-0.0238199	-0.0502342	-0.0477087	0.000800574	-0.0322839	0.0194768	0.0276349
Ankrd26	M5	green	-0.00160499	-0.0475377	-0.0243796	0.0184078	-0.000463508	0.0347914	0.0303638
Mfap3l	M1	turquoise	0.075454	0.0614426	-0.0194162	-0.0603406	0.00835569	-0.0334153	-0.0133166
Pbld1	grey	grey	0.023689	-0.0316021	-0.019124	-0.0107306	0.00451203	-0.00491318	0.0168001
Sdc1	M6	brown	0.0239068	0.0604328	0.0777716	-0.00732651	0.0473295	0.0875959	-0.00341635
Ncapg2	M2	yellow	-0.026505	-0.10515	-0.0705892	0.0861024	0.0134059	0.0140322	0.0409786
Snai1	M4	blue	-0.0407319	-0.0891366	-0.0819096	0.0814646	0.0646636	0.093165	-0.00906231
S1pr1	M2	yellow	0.0183065	-0.0641326	-0.0586268	0.0157004	0.0423458	0.0465638	0.032034
Tyms	M2	yellow	0.00292974	-0.0491603	-0.0347493	-0.00174974	0.0920942	0.0773475	0.0705516
Mical2	M1	turquoise	0.0616684	0.040363	0.0153414	-0.0504436	-0.0441356	-0.0198409	0.0128478
Pomk	M1	turquoise	0.0131649	-0.00452407	-0.0305604	0.0202777	0.0367148	-0.0140731	0.00521801
Rpgrip1	grey	grey	0.000962054	-0.0685401	-0.0672044	0.0287716	0.0528737	0.0401922	0.0639406
Phf11a	M6	brown	0.0195921	0.032333	0.00441387	-0.042266	-0.00801665	0.0182848	0.0470397
Il23a	M2	yellow	-0.0214293	-0.0889752	-0.091851	0.0212724	0.0750421	0.0782145	0.0498436
Socs2	M1	turquoise	0.00539313	-0.0312648	-0.00828391	-0.0342358	0.0248443	0.00477467	0.00363923
Tagln	grey	grey	-0.0442691	-0.0600629	-0.0228905	-0.010585	0.0708955	-0.0341383	-0.0314027
Klk8	M4	blue	-0.0557307	-0.0730987	-0.0360424	0.0778538	0.0570668	0.0634709	0.0769232
Dapk1	M1	turquoise	0.0284954	-0.0800901	-0.0608059	0.0126742	0.0202021	0.0951717	0.10248
Tgm2	M1	turquoise	0.454539	0.141966	-0.201151	-0.279102	-0.0174638	-0.106674	-0.00646732
4930523C07Rik	grey	grey	-0.0522139	-0.194164	-0.172895	0.177805	0.143273	0.156081	0.180622
Atp2b4	M1	turquoise	0.0146371	-0.113115	-0.131432	0.0442849	0.0955556	0.0170627	0.0648501
Prdm1	M2	yellow	-0.109956	-0.208137	-0.133832	0.158171	0.0887852	0.0712787	0.0910055
Rab7b	M2	yellow	-0.1772	-0.274551	-0.18252	0.194768	0.0720729	0.00969936	0.107248
Bcl11a	M1	turquoise	0.0407893	0.0231699	0.047611	0.017262	0.0885057	0.121119	0.0301065
Trim25	grey	grey	-0.0674357	-0.120042	-0.0936494	0.161756	0.0695864	0.040653	0.102134
Ciart	M6	brown	-0.0166419	-0.00819283	0.0175519	0.0232408	0.0250553	0.0337111	0.0329561
Scimp	M6	brown	0.0145569	-0.036394	-0.00838209	-0.00169497	0.0870581	0.0948811	0.135349
Hacd1	M2	yellow	-0.0742085	-0.0418051	0.0196941	0.053527	0.11611	0.0551377	0.108475
Sept1	M1	turquoise	0.0485531	-0.00737021	-0.0259317	-0.0311246	0.0712222	0.120797	0.038588
Ldlrad4	M5	green	-0.0202675	-0.0980794	-0.0866216	0.00880635	0.0893398	0.118065	0.0647711
H2-T23	M6	brown	-0.0160608	-0.10392	-0.046515	0.115977	0.164549	0.244854	0.19827
Prr7	grey	grey	-0.0292372	-0.0795772	-0.0626671	0.0386366	0.0796254	0.0807173	0.0995052
Ddx19b	grey	grey	-0.0284933	-0.105681	-0.0844275	0.0591054	0.0344304	0.0546731	0.0570124
E2f2	M6	brown	-0.0728086	-0.0988574	-0.063459	0.114837	0.0874007	0.0479447	0.0188092
L1cam	M1	turquoise	0.327611	0.164493	-0.0158149	-0.199638	-0.0041739	0.0396307	0.0277353
Neat1	M1	turquoise	0.151315	-0.288663	-0.372466	0.0926064	0.205429	0.102722	0.216015
Serpinb1a	M4	blue	-0.030943	-0.0737514	-0.0331219	0.110171	0.0524804	0.0847377	0.148525
Cfap97	M6	brown	-0.0147261	-0.0290681	0.00705008	0.0657685	0.0274523	0.129682	0.0443647
Tspoap1	M3	red	-0.0399551	-0.145827	-0.15852	0.0820552	0.0610873	0.0310683	0.113463
Bach2	M1	turquoise	0.00814237	-0.0786224	-0.105485	0.00102899	0.102817	0.15305	0.0755016
Fam102b	M4	blue	-0.297946	-0.320594	-0.14328	0.395137	0.112401	0.0716765	0.159973
Cd177	M4	blue	-0.283972	-0.332756	-0.12599	0.418545	-0.0418884	-0.023911	0.139809
Ehd1	M3	red	0.00705779	-0.256312	-0.381451	0.111091	0.117022	0.0271039	0.110785
Fgd2	M6	brown	-0.0167809	0.023765	0.0926906	0.0400363	0.0376553	0.15543	0.0871754
Gtpbp4	M1	turquoise	0.110738	0.0191161	-0.0414818	0.00469237	0.0657898	0.0754906	0.0729305
Ncoa7	M1	turquoise	-0.0170965	-0.0742809	-0.0180802	0.108914	0.0121504	0.0210498	0.0178021
Cdkn1a	M3	red	-0.00564211	-0.436211	-0.415276	0.304765	0.1634	0.0470258	0.225017
Dapp1	M1	turquoise	-0.0016441	-0.0693475	-0.0402661	0.0710966	0.0922743	0.0997517	0.130012
Slc15a3	M2	yellow	-0.071014	-0.262324	-0.249796	0.149747	0.127867	0.113077	0.136419
Sqstm1	M1	turquoise	0.0676379	-0.189612	-0.207869	0.0834586	0.0922175	0.126745	0.154615
Maco1	M1	turquoise	0.0546848	-0.0531673	-0.118214	0.00308786	0.0799249	0.105701	0.0695332
Cfp	M6	brown	-0.135849	-0.172274	-0.0617447	0.224819	0.154571	0.168269	0.140109
Cbr3	M4	blue	-0.0514311	-0.140089	-0.117016	0.15429	0.0591804	0.066774	0.0948962
Zmynd8	M1	turquoise	-0.0415033	-0.0548614	-0.000795406	0.0509414	0.0400117	0.0540228	0.0187172
Cd274	M1	turquoise	0.292453	0.122677	-0.0237438	-0.185046	-0.0346019	0.0733701	0.0546231
B3gnt5	M2	yellow	-0.183781	-0.345639	-0.22296	0.255513	0.000729372	-0.052826	0.0716118
Anxa3	M4	blue	-0.0937337	-0.0829296	-0.0399579	0.127763	0.0665483	0.0662858	0.119793
Ccl9	M4	blue	-0.188183	-0.353581	-0.111471	0.517359	0.183779	0.229061	0.173415
Dhrs9	M1	turquoise	0.0428524	-0.137944	-0.156796	0.024509	0.0631997	0.0450131	0.0844979
Tnfrsf18	M6	brown	0.0299871	-0.0889033	-0.084616	-0.0162968	0.110182	0.116289	0.118802
Sqle	M5	green	0.0133513	-0.0107025	-0.0198018	0.00783526	0.138992	0.0597975	0.0306412
Clec5a	M2	yellow	-0.134263	-0.183317	-0.0729763	0.21744	-0.00567887	0.0240038	0.17524
Ear2	M1	turquoise	0.213919	0.0926638	0.0157776	0.0260584	-0.00717189	-0.0223816	0.0020706
C130026I21Rik	M2	yellow	-0.0857047	-0.15081	-0.0980331	0.169089	0.0466265	-0.0360663	0.0495924
Itgb7	M4	blue	-0.132303	-0.186982	-0.0820146	0.250843	0.152137	0.161879	0.172432
Lrfn1	M2	yellow	-0.0727285	-0.124602	-0.0897544	0.0712736	0.152188	0.00349016	-0.0414417
Slc30a1	M6	brown	-0.0150485	-0.0117799	-0.00664887	0.108693	0.0670246	0.158855	0.0600325
Tuba1a	M1	turquoise	0.0298766	-0.058373	-0.0761153	0.0960736	0.143514	0.16185	0.125758
Pltp	M1	turquoise	0.359515	0.186099	-0.0392843	-0.188994	0.0127487	0.116631	0.102572
Cd84	M4	blue	-0.127964	-0.189654	-0.106611	0.283223	0.0601787	0.0669619	0.098329
Pcgf5	M3	red	-0.0477153	-0.145979	-0.172502	0.11326	0.0522795	0.0124813	0.0640531
Fyn	M1	turquoise	0.337472	0.129596	-0.0664206	-0.19016	0.127778	0.0473916	0.0829203
Lbp	M4	blue	-0.0940204	-0.0693246	-0.0108571	0.153628	0.0401667	0.019969	0.0738594
Spink2	M4	blue	-0.0994833	-0.0868056	-0.0127032	0.133842	-0.0312083	-0.0178189	-0.0402527
Rnf122	M6	brown	-0.00328739	-0.0335286	-0.0193003	0.0270303	0.00398139	0.0321651	0.0339754
Kif15	M1	turquoise	0.103337	0.0600966	-0.00430507	-0.0300866	0.0319907	-0.00145	0.0589373
Skil	M3	red	0.0818464	-0.220181	-0.343848	0.0298363	0.122607	0.118536	0.117082
Naaa	M4	blue	-0.199389	-0.284196	-0.127014	0.333928	0.138463	0.127686	0.154133
Clec2d	M1	turquoise	0.070718	-0.0379832	-0.0226701	0.0308308	0.118445	0.0776093	0.14239
Ifi204	M4	blue	-0.143833	-0.147141	-0.0108142	0.220569	0.173918	0.062649	0.0522926
Tcf7	M6	brown	0.00859085	-0.0111247	-0.00334354	-0.017332	-0.009529	-0.00409037	-0.0213185
Ypel1	M6	brown	-0.0345869	-0.0541077	-0.0392102	0.0329446	0.0182542	0.0498111	0.0502944
Gm49864	grey	grey	-0.0388479	-0.0119502	0.0344688	0.0330577	0.041225	0.0642062	0.109781
Optn	grey	grey	0.0701537	-0.0983757	-0.118352	0.00505283	0.0589343	0.0647912	0.0701218
9130230L23Rik	M6	brown	-0.0379775	-0.00442846	0.0695535	0.064064	0.0807753	0.0724836	0.0270606
Il11	grey	grey	-0.00119104	-0.0402978	-0.0106894	0.0375217	0.0193001	0.0298977	0.0557568
Cd19	M1	turquoise	0.0188632	-0.0555124	-0.0645546	0.00368866	0.140626	0.149545	0.0524513
Dusp8	M5	green	-0.00439448	-0.0601805	-0.041564	0.0474529	0.0346351	0.0419664	0.0673124
Olfr920	M5	green	0.0441648	-0.0674471	-0.0563996	0.0216646	0.060281	0.0549462	0.0350076
1700063J08Rik	M4	blue	-0.0287961	-0.0544493	-0.0366309	0.0775958	-0.0117604	0.0193024	0.0615755
C130036L24Rik	M1	turquoise	0.0181568	0.0322085	-0.0108428	-0.0175243	-0.06014	-0.029567	-0.0380209
Cd38	M1	turquoise	-0.0141815	-0.0471453	-0.0714428	-0.00160767	0.0152466	0.0594972	0.0183592
Csf2rb2	M4	blue	-0.114701	-0.160742	-0.0733972	0.106172	0.0453248	0.118498	0.13185
Serpinb8	M4	blue	-0.144832	-0.16934	-0.0731765	0.192879	0.104751	0.192087	0.0581194
Wnt6	M1	turquoise	0.0920348	0.0204089	-0.060298	-0.0250191	-0.0154982	0.0155729	0.102477
B230208H11Rik	grey	grey	-0.0348962	-0.062485	-0.0448673	0.0760037	0.0634883	0.0485204	0.149391
Trib2	grey	grey	0.0154072	-0.0592783	-0.0803257	0.00533529	0.0745934	0.0770452	0.0430983
A930006K02Rik	M6	brown	0.0244625	0.0364265	0.034619	0.0112582	0.0827849	0.0548012	0.082808
Lonrf3	grey	grey	-0.0362469	-0.0565476	-0.0250376	0.0257231	-0.025714	-0.0397589	0.0234796
Il1a	M2	yellow	0.00466335	-0.118385	-0.119652	0.0604485	-0.00988414	0.0327628	0.0828723
Ikzf3	M1	turquoise	0.166304	0.0821528	0.0110142	-0.129209	0.0731373	0.0680457	-0.00567946
Slc15a2	M3	red	-0.0975024	-0.306403	-0.327906	0.214463	0.143021	0.0873739	0.198109
Ckb	M1	turquoise	0.00274493	-0.037306	-0.0450408	0.0529585	0.0274635	0.018881	0.0170461
Dusp5	M1	turquoise	0.460097	0.0505192	-0.245635	-0.243092	0.0814401	-0.00942797	0.0993092
Frmd4a	M6	brown	-0.0428682	-0.0307587	0.0318114	0.0492859	-0.0216925	0.108216	0.0898015
Abcb1a	M3	red	0.0337185	-0.0560261	-0.0973281	0.0235797	0.078272	0.0187684	0.0672819
Pou2f2	M1	turquoise	0.576275	0.227091	0.0548373	-0.251412	0.102051	0.0730489	0.0325283
Hs6st1	M1	turquoise	0.0353977	-0.0584095	-0.11416	-0.00409412	-0.0185201	-0.0360697	0.0518173
Smc2	M1	turquoise	0.0876059	0.0292174	-0.0153287	-0.00437295	0.0439668	0.0529847	0.0535331
Gngt2	M1	turquoise	0.653418	0.22443	-0.0288272	-0.20958	0.161491	0.136716	0.0806616
Ifrd1	M3	red	-0.0431103	-0.462055	-0.482577	0.286476	0.197119	0.0658099	0.195245
Inpp1	M1	turquoise	0.111239	0.0407897	-0.0771243	-0.0261046	-0.0481811	-0.0827325	0.0110253
Gprc5a	M2	yellow	-0.124747	-0.244062	-0.172399	0.139729	0.0493001	-0.0406817	0.0367854
Ugcg	grey	grey	-0.0102721	-0.116843	-0.0424011	0.121102	0.0667738	0.0795182	0.133678
Dpysl2	M2	yellow	-0.0829021	-0.183766	-0.112584	0.15108	0.0768266	0.145282	0.126044
Cd82	M1	turquoise	0.305223	0.131062	-0.0283116	-0.191784	0.00918911	0.0299461	0.0118423
Jade2	M1	turquoise	0.140203	0.0665858	0.0364707	-0.100089	-0.0290734	0.0202412	-0.0078877
Tsc22d1	M4	blue	-0.131646	-0.082369	0.00716844	0.162338	0.0158857	0.0156932	0.0568369
Fam110a	M2	yellow	-0.0456777	-0.162257	-0.143373	0.0702516	0.0770473	0.078308	0.0389065
Cyth3	M1	turquoise	0.366941	0.164681	-0.0903521	-0.247371	0.0419979	0.0102764	0.0042331
Smox	M2	yellow	-0.18499	-0.455923	-0.334725	0.299772	0.0522644	0.0266665	0.174741
Clec4a2	M4	blue	-0.301867	-0.28405	-0.0282642	0.49098	0.0997262	0.173128	0.149138
Fam133b	M1	turquoise	-0.00608896	-0.0828365	-0.0698656	0.0778304	0.057379	0.0640634	0.112108
Padi2	M6	brown	0.0154436	-0.0978761	-0.0830455	0.103587	0.0957831	0.111696	0.0748275
Rab20	M3	red	-0.00458782	-0.185295	-0.223685	0.126204	0.148611	0.0377411	0.0842829
C1qtnf6	M4	blue	-0.0433027	-0.0282282	-0.0130301	0.130348	-0.0523523	-0.00760325	0.0695155
Swap70	M6	brown	-0.00417554	-0.0693939	-0.0532629	0.0207699	0.0410312	0.172593	0.146008
Camp	grey	grey	-0.0321043	-0.0798578	-0.0513644	0.0642506	-0.0187108	-0.0138432	0.081143
Tubb2b	M5	green	-0.0086636	-0.0430756	-0.0331695	0.0143321	-0.0110751	0.0277879	0.0238058
Plaur	M3	red	0.0104372	-0.449885	-0.536343	0.275525	0.158112	0.0115696	0.195468
Zbtb1	M1	turquoise	0.00623018	-0.0690304	-0.0805406	0.0469156	0.00184521	0.0233923	0.0267734
Ncf1	M6	brown	0.00461281	-0.131561	-0.133332	0.098994	0.127038	0.206294	0.13208
Lmo1	M4	blue	-0.124311	-0.151536	-0.0651532	0.203793	0.0704612	0.0634824	0.141416
Gm48065	M2	yellow	-0.11375	-0.221906	-0.132759	0.186145	0.0436782	0.017121	0.103874
Ccdc71l	M3	red	-0.00621095	-0.134672	-0.120443	0.106053	0.0267223	0.0127105	0.112743
Dop1b	grey	grey	-0.0473027	-0.186866	-0.153292	0.139657	-0.0180898	0.0259085	0.151051
Gm13212	M4	blue	-0.0979451	-0.101291	-0.00474866	0.183743	0.0505048	0.0238343	0.0973131
Rhov	M4	blue	-0.0989689	-0.121892	-0.0465192	0.141547	0.0742151	0.0312944	0.0863442
Upp1	grey	grey	-0.0426856	-0.0555724	-0.0589697	0.0545635	0.0443195	-0.0102355	-0.0295849
Plec	M5	green	-0.100682	-0.177886	-0.106374	0.150374	0.203054	0.129579	0.112646
Gm43623	M1	turquoise	0.0620917	0.0564669	0.0793302	-0.0678272	0.0827949	0.0191891	0.0309625
Il7r	M1	turquoise	-0.0222007	-0.0698016	-0.0633892	0.00883252	-0.00161799	-0.00949866	0.0177099
Atf5	M5	green	-0.00425076	-0.0947023	-0.0745489	0.00481172	0.0768588	0.0486504	0.0386108
Gfpt1	M1	turquoise	0.314801	0.0736358	-0.111409	-0.131761	0.0425806	0.0280692	0.0600883
Tfrc	M1	turquoise	0.0479312	-0.0443361	-0.074957	0.00524432	0.0337057	0.0839283	0.0509854
Casp3	M1	turquoise	0.067839	-0.0653094	-0.0831019	0.00617997	0.041447	0.0335539	0.0610024
Ceacam1	M1	turquoise	0.447213	0.226801	-0.0333146	-0.177005	0.048023	0.0545491	0.0713015
Arl5c	M1	turquoise	0.0316127	-0.155229	-0.148714	0.165503	0.16163	0.114235	0.14868
Hmgn1	grey	grey	-0.0247534	-0.122998	-0.098865	0.0839952	0.113604	0.135754	0.214152
Kdm2b	M6	brown	-0.049464	-0.097928	-0.0704845	0.0691323	0.109017	0.183471	0.123861
Smpdl3b	M1	turquoise	0.356053	0.160597	-0.0332618	-0.17871	0.0735491	-0.0019171	0.0791734
Stap1	M1	turquoise	0.449971	0.101656	-0.181966	-0.263001	0.0278318	-0.0698825	0.0710012
Ptger4	M1	turquoise	0.111891	0.0261074	-0.0286484	-0.088631	0.117522	0.0957189	0.042258
Akr1b10	M1	turquoise	0.0625854	0.0781959	0.0881719	-0.0160975	-0.0285377	0.0365419	0.0512692
Sesn2	grey	grey	-0.019845	-0.085894	-0.0917126	0.101443	0.044217	0.0281807	-0.00191026
Sgk1	M1	turquoise	0.322622	0.131888	-0.0342342	-0.102112	0.0248385	0.00861652	0.0296856
Anxa2	M4	blue	-0.116164	-0.436818	-0.190108	0.566605	0.296126	0.231662	0.294534
Klf9	M1	turquoise	0.08352	-0.0205104	-0.0859206	0.0773502	0.155736	0.0752541	0.0647334
Tchh	M1	turquoise	0.0490077	0.0212161	-0.0266921	-0.00424819	0.0126393	0.00993921	0.0204559
Ank2	M5	green	-0.000271856	-0.0393041	-0.0122176	-0.0221147	0.0434674	0.0358072	0.0333849
Fam110b	grey	grey	-0.0121779	-0.0331424	0.00974999	0.0155877	0.0918148	0.0264109	-0.0116169
Tbc1d2	M6	brown	-0.0242027	-0.0237704	0.0309633	-0.0124302	-0.048929	-0.00253422	-0.0272623
Col4a2	M1	turquoise	0.0571316	0.0109428	-0.0842309	-0.033091	0.0352275	0.00602877	0.0180094
Gm47917	M6	brown	-0.0232804	0.0182608	0.0514827	0.0430992	0.0299102	0.0853934	0.0304166
Rasd1	grey	grey	-0.0529106	-0.0369588	0.0231971	0.0773654	-0.0510058	-0.0294195	0.0558712
1700020L24Rik	M6	brown	-0.0537537	-0.01238	0.0661064	0.0815077	-0.00618987	0.0106685	-0.0427132
Birc5	grey	grey	0.00480645	-0.0913243	-0.087216	0.0431606	-0.000973574	0.00695124	0.0556387
Platr25	M6	brown	-0.014772	0.017946	0.0279364	0.00304705	-0.0468735	0.101491	0.0763099
Arhgap22	M5	green	0.0114874	-0.0661288	-0.0701515	-0.0150433	-0.0120005	0.00716779	0.0126307
Uhrf1	M6	brown	0.00801912	-0.0134576	0.0082916	-0.00130118	0.0262362	0.0113669	0.0324478
4930505N22Rik	M2	yellow	-0.0454447	-0.0862443	-0.0751385	0.076288	0.0381407	-0.00193561	-0.00254758
Rbm3os	M6	brown	-0.00775288	0.0103425	0.0478781	0.0353141	0.079527	0.0599112	0.0826089
Armcx6	M6	brown	-0.00940926	0.0196987	0.0421856	0.0206188	0.037614	0.0911809	-0.0281717
Gpc1	grey	grey	-0.0381085	-0.0180217	0.028829	0.0796866	-0.00914551	0.0241243	0.0429955
Cd247	grey	grey	0.0346297	-0.00417969	-0.00821815	0.0120394	0.0154388	0.0542625	0.0644411
Gm10134	M5	green	-0.0498648	-0.0842672	-0.0686588	0.0443084	0.0329465	0.0431458	0.00991528
Lgr4	grey	grey	-0.00297969	-0.022617	-0.0101492	0.0251633	0.00657777	-0.000620208	-0.019878
Tgm3	M1	turquoise	0.0884415	0.0610378	-0.00679555	-0.0777239	0.0221985	-0.039129	-0.0788491
Cdk5rap1	grey	grey	0.0337018	0.00721445	0.0291913	-0.0207675	0.0868174	-0.0188385	0.0164042
9230111E07Rik	M2	yellow	-0.0395358	-0.092962	-0.0598005	0.0787328	-0.0206644	0.0249006	0.0481282
Lck	M6	brown	0.0371847	0.0132114	-0.00589059	-0.00374922	0.0485341	0.0564531	0.0443056
Poln	M1	turquoise	-0.0193572	-0.0328401	-0.0428063	0.0351267	-0.0226171	-0.0344182	0.00101082
Rad9b	M1	turquoise	-0.0200454	-0.024758	-0.0522884	-0.0305426	-0.00833623	-0.0223366	-0.0155631
Igf2bp3	M6	brown	-0.00467725	-0.0171631	0.0414167	-0.00668944	0.0819644	0.0625511	0.0521996
Cd4	M5	green	-0.0230068	-0.0357334	-0.0426851	-0.0340783	0.0280791	-0.0202359	-0.0164796
Ccdc15	M1	turquoise	0.0486204	0.0600273	0.0446434	-0.0462985	0.0408938	0.0362278	-0.0432983
Ifng	M6	brown	0.0151795	0.00279501	0.0421145	0.0511634	0.0711599	0.0852487	0.0397948
Akap1	M6	brown	-0.022833	0.0318085	0.0589093	0.0440098	0.00219507	0.128681	0.0771298
Mok	M5	green	-0.036854	-0.0199225	-0.000826315	0.0573269	0.107363	0.0484176	0.0272435
Wdr60	grey	grey	-0.0306431	-0.038325	0.00881298	0.0374879	-0.0338085	-0.0544914	0.0506576
Gm34084	M1	turquoise	0.0449631	0.0272632	-0.0325914	-0.0622761	-0.036502	0.0885445	-0.0510624
Dbn1	grey	grey	-0.00147071	-0.0323711	-0.0209612	0.00425346	0.0174763	-0.00774523	0.0219606
Cenpk	grey	grey	-0.0286437	-0.0489003	-0.0262276	0.0586761	0.0128145	-0.01713	0.0568226
Rgs7bp	M4	blue	-0.0437739	-0.0283688	0.028876	0.0643246	-0.0253938	-0.00071416	0.0753504
Rarb	grey	grey	-0.0394265	-0.00589193	0.0483863	0.046874	0.0353977	-0.0396672	0.0693144
Krt18	M1	turquoise	0.00689106	-0.00175471	0.0131414	-0.00878202	0.0654265	0.0228003	0.0791724
1700097N02Rik	M6	brown	0.0249883	0.0171886	0.0442413	0.00792166	0.0550965	0.111982	0.0741516
Carns1	grey	grey	-0.022704	-0.0538689	-0.0241336	0.0484884	0.0100432	-0.0162365	0.0711262
Gm35554	M6	brown	0.0521609	0.0141901	0.00509166	-0.0149884	0.00724924	0.0680285	0.0497755
Hectd2os	M1	turquoise	0.100185	0.0545471	0.036909	-0.0490404	-0.0276677	0.0148052	-0.0478911
Ets2	M3	red	0.0399491	-0.339347	-0.470626	0.158756	0.0748895	-0.0230436	0.184849
Mapk8	M1	turquoise	0.0357994	0.0327097	0.00941072	0.0351859	-0.0344007	0.0302461	0.0250948
Irf2bp2	M2	yellow	-0.290321	-0.429924	-0.23205	0.399235	0.0887874	0.0734542	0.201918
Nop58	M6	brown	-0.0789315	-0.106509	-0.0618889	0.116196	0.0960579	0.0879005	0.0713883
Hebp1	M4	blue	-0.224721	-0.285117	-0.124198	0.47672	0.032427	0.0572701	0.179432
Rtn1	M1	turquoise	0.116036	0.0123449	-0.00686872	-0.0629952	0.076639	0.0733749	0.0618828
Twnk	M6	brown	-0.0294062	-0.0552702	-0.027763	0.0974923	0.0748394	0.0898859	0.0564244
Specc1	M1	turquoise	0.150923	0.0313107	-0.067694	-0.0906483	-0.00118687	-0.0461367	0.00533934
Rab11fip1	M3	red	0.0316312	-0.169866	-0.215594	0.0974765	0.132511	0.0490571	0.136507
Gm20045	M6	brown	-0.0532832	-0.103961	-0.072298	0.0555671	0.00337563	0.0288668	0.011297
Cd34	M1	turquoise	-0.0215732	-0.0421418	-0.0424859	0.0116476	0.0463315	0.0735555	0.0546159
Alg6	M1	turquoise	0.0252455	0.00211636	-0.0306248	0.0287393	0.0223852	-0.0201976	-0.0202612
Usp18	M6	brown	-0.0120963	-0.00583188	0.0494509	0.044186	0.0560486	0.155905	0.0609876
Zc3h12c	M1	turquoise	-0.0316633	-0.072802	-0.0642596	0.0201987	-0.0423564	-0.00479916	0.0545432
Zfp839	grey	grey	0.0484344	0.033314	0.0207022	-0.027642	0.0581949	0.053731	0.0554871
Mettl4	M5	green	-0.0262816	-0.0478322	-0.0677026	0.0435697	0.0437047	0.0807038	0.0316468
4930453N24Rik	M6	brown	0.0304551	0.0658529	0.0756124	0.0305583	0.034472	0.174519	0.0731828
Rel	M1	turquoise	0.400163	-0.127349	-0.332015	-0.0851182	0.127566	0.0336961	0.075494
Tnfaip6	M2	yellow	-0.0472294	-0.0927608	-0.0468698	0.0656156	-0.0381803	-0.0421635	-0.0100273
Spag9	M3	red	-0.0523146	-0.485136	-0.468461	0.266696	0.240592	0.0310196	0.242179
Gria3	M4	blue	-0.078663	-0.122928	-0.0859066	0.0870956	0.0249496	0.100312	0.0923887
Dnaja1	M1	turquoise	0.122985	-0.229966	-0.156626	0.178833	0.172748	0.205358	0.159846
Zfhx3	M4	blue	-0.105438	-0.119465	-0.0331762	0.200088	0.0525738	0.0737526	0.132733
Tlr2	M2	yellow	-0.240181	-0.413337	-0.275024	0.372292	0.0671471	0.0378377	0.185118
Shtn1	M4	blue	-0.0781141	-0.11151	-0.0650881	0.0927751	0.116915	0.112976	0.116403
Ecm1	M4	blue	-0.0552277	-0.135227	-0.103415	0.141511	0.093796	0.0657208	-0.00399836
Cox6b2	M2	yellow	-0.168518	-0.240743	-0.0872103	0.257533	0.105075	0.0195266	0.100664
Fpr2	grey	grey	0.0721162	-0.0594052	-0.0980934	0.0577179	-0.00912191	0.0164037	-7.78497e-05
Styx	M1	turquoise	-0.00211577	-0.0250201	-0.0245366	0.0179595	-0.0432885	0.0149995	0.0706122
Mef2c	M1	turquoise	0.235158	0.0388093	-0.0716892	-0.0440712	0.0783214	0.136344	0.129482
Gm43774	M1	turquoise	0.0526208	-0.00838781	-0.0374471	-0.0102332	-0.000455293	-0.0464489	-0.0544543
Tmem80	M6	brown	0.0344311	0.0181515	0.0450337	-0.00222035	0.00624016	0.0593832	0.0323556
Osgin2	M1	turquoise	0.309078	0.122021	-0.102103	-0.155901	-0.0503936	-0.00950918	-0.0572073
E230029C05Rik	M1	turquoise	0.154683	0.00742333	-0.0907931	-0.0142266	-0.0396271	-0.00354625	0.112353
Plcb1	M4	blue	-0.268449	-0.264791	-0.116826	0.374996	0.0584685	0.0302268	0.101981
Bcl2	M1	turquoise	0.326992	0.207816	0.0473258	-0.20131	0.0149759	0.0941214	0.0597149
Dusp6	M6	brown	0.00999773	0.0651431	0.169102	0.128436	0.138311	0.237394	0.0210272
Cfb	M4	blue	-0.0570388	-0.077534	-0.0186917	0.106951	0.0419758	0.0625681	0.0687013
Nfkbid	M1	turquoise	0.0377315	-0.117567	-0.167154	0.0484963	0.117298	0.129743	0.16404
Tgif1	M3	red	-0.0187996	-0.28217	-0.343106	0.17382	0.0530033	0.0638314	0.145871
Mgst3	M4	blue	-0.101133	-0.146978	-0.0536992	0.176688	0.106663	0.113499	0.103086
S1pr5	M1	turquoise	0.403407	0.295366	0.0882597	-0.285708	-0.0942995	-0.0308832	0.00981213
1810034E14Rik	M4	blue	-0.0310644	-0.0534803	-0.0339603	0.0863603	0.0258515	0.0707548	0.0380779
Gpr84	M4	blue	-0.014965	-0.0529135	-0.0567142	0.0208587	0.0366273	0.0193713	0.0269068
Cdca8	grey	grey	0.0383548	0.0138105	0.0391729	0.0394261	-0.00373345	0.0617046	0.0140151
Gm5608	M2	yellow	-0.0368385	-0.0687786	-0.0419017	0.0558399	0.0142613	-0.0132836	0.0998217
Arhgap32	M4	blue	-0.0191797	-0.0590991	-0.0641962	0.0234395	-0.0128774	0.0323208	0.0356886
Gm19325	M2	yellow	-0.0338272	-0.123524	-0.0953984	0.0758642	0.0736547	0.00875196	0.0688364
Lpin1	M6	brown	0.0163546	0.00359278	-0.00338444	-0.0108559	0.0464971	0.0452295	-0.011515
Rnf125	M6	brown	0.006065	-0.0414224	-0.064621	0.0162892	0.0770027	0.0530385	0.0480313
Pip5k1b	M5	green	0.0827658	-0.0877277	-0.129743	-0.0128249	0.135696	0.138834	0.106788
Slc25a53	M5	green	-0.0079884	-0.0133142	-0.0296258	0.0355186	0.0184918	0.00733531	0.0376941
Clec2i	M1	turquoise	0.178982	0.044883	-0.00919848	-0.0414859	0.0654467	0.008743	0.0535175
Samsn1	M1	turquoise	0.38614	-0.0317397	-0.223909	-0.0499336	0.0899584	0.0271185	0.0945038
Arhgef40	M5	green	-0.00953594	-0.0401446	-0.0321209	-0.01566	0.0568026	0.0775104	0.094464
Gm16310	M1	turquoise	-0.0558051	-0.0773161	-0.0573289	0.0282814	0.0214777	0.0814425	-0.0060352
P2ry10b	M1	turquoise	0.208785	0.110086	-0.00938999	-0.145992	-0.00516381	-0.0157626	-0.0333834
Snhg15	M1	turquoise	0.140482	-0.00332789	-0.08657	-0.0650103	0.0730521	0.0790032	0.102086
S100a6	M4	blue	-0.322669	-0.519444	-0.182237	0.763455	0.280053	0.241543	0.315153
Srgn	M3	red	0.175148	-0.37336	-0.493911	0.295047	0.182485	0.114492	0.276564
Rftn2	grey	grey	-0.00247077	-0.0262646	0.00582937	0.0274749	0.0492625	0.060019	-0.0120753
Gm4319	M5	green	-0.0243899	-0.0731791	-0.0623491	0.016553	0.0570718	0.0538482	0.0242647
Otos	M2	yellow	-0.0250011	-0.0288675	-0.032503	0.0403056	-0.0109374	-0.0234222	-0.022123
Itln1	M1	turquoise	0.0726144	0.0210303	-0.0134454	-0.0350925	0.0304114	0.0429303	0.0301723
Lefty1	M6	brown	-0.0424818	0.0112772	0.0694432	0.0492393	-0.0159845	0.0355845	0.00202149
Flrt3	M5	green	-0.0290568	-0.0824912	-0.0476859	0.0559326	0.0255838	0.0491701	0.0119967
Lhfp	M6	brown	-0.0125546	0.016933	0.0636171	0.0102373	0.0520679	0.0738436	0.0156468
Fcrls	M6	brown	-0.0351152	0.026442	0.0444303	-0.00677516	-0.0405751	-0.0036531	0.0629926
Sycp1	M5	green	-0.0294679	-0.0090626	-0.0181874	0.0492352	0.0085721	-0.0123405	-0.0223722
Pou3f1	M1	turquoise	0.0628816	0.00874976	-0.0349028	-0.04757	-0.0116384	-0.059469	-0.0364854
Sh2d5	grey	grey	-0.050827	-0.00611827	0.0314296	0.025352	0.0793442	-0.0157865	0.039
Nbl1	grey	grey	-0.0240282	-0.0374878	0.00635561	0.0233813	0.059059	0.0489319	0.0135942
Kazn	M5	green	-0.0256883	-0.0413788	-0.0251736	0.00810186	0.0648293	0.0639628	0.0452097
Gm15050	M6	brown	-0.0163763	-0.00404783	0.0291056	0.0501164	0.0630338	0.0546419	0.0235099
Slc6a12	M1	turquoise	0.0803715	0.0592492	0.0137209	-0.0450394	-0.0390275	-0.0500761	-0.0747584
Zfp772	M1	turquoise	0.046773	-0.0370374	-0.0650803	-0.00611229	0.0889735	-0.0181504	0.0265621
Dmpk	M5	green	-0.0035168	-0.0623701	-0.0625561	-0.014162	0.0269283	0.015435	0.0295947
Mrvi1	M5	green	-0.00187308	-0.0450475	-0.05441	0.0202626	0.0396326	0.0348527	-0.0291212
4930448A20Rik	M1	turquoise	-0.011644	-0.0422647	-0.0223063	0.0257333	-0.0270246	-0.0473498	0.0286793
Cox6a2	M5	green	-0.00369467	-0.0636829	-0.0777053	-0.0113615	-0.00985237	0.0848238	0.0543226
Prag1	M1	turquoise	0.0529483	0.00913161	-0.0182844	-0.0317736	0.0592649	0.020331	0.014711
Tlr3	M1	turquoise	-0.00850393	-0.000367868	0.011223	-0.00736736	-0.00483435	0.0327033	0.0671408
Comp	M2	yellow	0.0431261	0.00523799	0.0291805	-0.0053912	-0.052417	0.00739288	-0.030951
Mast1	M1	turquoise	0.000499187	-0.00958743	-0.0248785	0.0179534	0.00704119	-0.0144416	-0.00991147
Gm15655	M6	brown	-0.0287517	-0.0102003	0.020985	0.05779	0.0407234	0.0296724	0.0629641
Gm45805	M2	yellow	-0.0365351	-0.0705839	-0.0671429	0.0362727	-0.0332412	-0.026638	-0.0157647
Anln	grey	grey	0.00225132	0.00811137	-0.000426727	0.0302003	-0.0437538	0.0291181	0.00572507
Megf11	M5	green	0.0178347	-0.0252869	-0.022627	-0.0152722	0.0232077	0.0349979	0.00731431
Il20rb	grey	grey	-0.0290014	-0.0341458	-0.0303163	0.0241614	-0.0124692	0.0336199	0.0354976
Als2cl	M1	turquoise	0.0406643	0.00539627	-0.0219893	-0.00964605	-0.0016623	0.0291668	-0.0200282
Ppil6	grey	grey	-0.00682204	-0.0444455	-0.0482175	0.0470879	0.0342949	0.00615512	0.0419981
Hk1os	grey	grey	-0.0247513	-0.0573017	-0.0270116	0.0757795	-0.00314362	-0.0230268	0.0521497
Pemt	grey	grey	-0.0431249	-0.0842134	-0.0512633	0.0779004	-0.0112342	-0.027372	0.0668285
Gm20234	M1	turquoise	0.0196513	0.0238652	0.000936325	-0.00697451	-0.00187217	-0.0315303	0.0346902
Gm527	M1	turquoise	0.0147985	-0.0569785	-0.0791387	0.026737	0.0624298	0.0279965	0.0110146
Rapgef5	M1	turquoise	0.0361891	-0.0177761	-0.0583363	-0.0387729	0.0249537	0.0475146	-0.0048323
Gng4	grey	grey	-0.0480575	-0.0854339	-0.0793154	0.0758628	-0.0370621	-0.0313062	0.0590992
Hist1h2bm	M5	green	0.0400045	0.0179206	0.0184998	-0.0064476	0.00221327	0.0202508	0.0189909
D030051J21Rik	grey	grey	-0.0492271	-0.0678433	-0.0374563	0.0699042	0.0265755	-0.0232084	-0.0224128
Gm2895	M6	brown	-0.0174711	0.0167787	0.0681627	0.0164694	0.0738549	0.0622664	0.0509092
Nrbp2	grey	grey	0.0371337	0.0122972	-0.00736714	-0.0233341	0.0696433	-0.0165288	-0.00904968
Troap	M6	brown	-0.0467905	-0.0392496	0.0230447	0.0489117	0.0528215	0.042025	-0.0173398
Zfp174	M1	turquoise	0.0338151	0.0353622	-0.0180353	-0.0396919	-0.0193535	0.0292017	-0.0218579
4632428C04Rik	M5	green	0.0192428	-0.0336372	-0.033417	0.0284347	0.0669059	0.0236059	0.044035
Cep97	M2	yellow	-0.0531597	-0.0733187	-0.0776898	0.070108	-0.00087213	-0.0208632	-0.051205
Rab26os	grey	grey	-0.0199486	-0.0353638	0.0126574	0.0480784	0.00104871	-0.00285747	0.0519314
Sox8	M1	turquoise	0.00481247	0.0307112	0.0232125	0.0225508	0.0123163	0.0466697	-0.0016831
Zfp563	grey	grey	-0.0433914	-0.0510957	-0.00888826	0.0315895	-0.00366311	-0.0256727	-0.0141274
Zbtb12	M6	brown	0.0159394	0.0163328	0.0650272	0.0345474	0.0390133	0.00556584	-0.0255542
Gm10501	grey	grey	0.00185437	0.00702583	-0.0154246	0.0301927	-0.01063	0.0285279	-0.0201381
Gm19585	M5	green	0.0311658	-0.0319853	-0.027078	0.0235343	0.043457	0.104797	0.0508949
Nudt12	M2	yellow	0.00163066	-0.0501339	-0.0265592	0.0013075	-0.0197011	-0.0172159	-0.00925766
C430042M11Rik	M1	turquoise	0.0790755	0.0384512	-0.0449332	-0.0520545	-0.0276103	0.0146456	-0.000512944
Gm29946	M2	yellow	-0.0533974	-0.0797382	-0.0163412	0.0734445	-0.019415	-0.0181408	-0.00593231
Arhgef9	grey	grey	0.00419845	-0.0420714	-0.0178122	0.00945771	-0.0158879	-0.0186133	0.0378073
Cd300ld	M1	turquoise	0.505622	0.213623	-0.0655152	-0.285464	-0.015753	-0.0141686	0.0553182
Bcl2a1a	M1	turquoise	0.259407	0.0573623	-0.100348	-0.16824	0.019586	0.0840134	0.0417634
Sclt1	grey	grey	-0.00409412	-0.0227173	-0.00720266	0.0230788	-0.0148393	0.00933059	0.0760479
Gab1	M2	yellow	-0.159337	-0.247418	-0.155567	0.207238	-0.0280917	-0.0318021	0.0690963
Cdkl2	grey	grey	-0.0367039	-0.0832173	-0.0640028	0.0919458	0.046355	-0.0330423	0.0312235
Cdk6	M1	turquoise	0.0256883	-0.0380062	-0.0756039	-0.00318042	0.0817522	0.0619006	0.078755
Eef1aknmt	M2	yellow	-0.144088	-0.258858	-0.156439	0.201083	-0.0279098	-0.0778468	0.0932967
Hook2	M6	brown	-0.067543	-0.118733	-0.0663657	0.100057	0.0517586	0.0673364	0.0733309
Mafk	M6	brown	-0.0548718	-0.0826994	-0.0457809	0.148028	0.142235	0.198437	0.100301
2310040G24Rik	M4	blue	-0.091282	-0.0940215	-0.0207556	0.117033	0.073062	0.110236	0.0794516
Smim3	M2	yellow	-0.120738	-0.299598	-0.230504	0.194596	0.149524	0.0552846	0.0935647
Rcan1	M1	turquoise	0.0798794	-0.0380729	-0.0714612	-0.00804071	0.0206968	0.0417525	0.00396481
Sh2d2a	M4	blue	0.0418311	-0.007627	-0.00664665	0.0198355	0.0462773	0.0823091	0.0538154
Hbegf	M6	brown	-0.0184089	-0.0243496	0.0236029	0.0510679	0.0272402	0.0165711	0.0752658
Tsc22d2	M1	turquoise	0.0310076	-0.0739236	-0.0360104	0.0511252	0.0637429	0.0895824	0.0963449
Slc16a3	M1	turquoise	0.198386	-0.13279	-0.317649	-0.00857927	0.0623961	-0.0759609	0.0688295
Flt1	M1	turquoise	0.136433	0.0389855	-0.0602619	-0.0328655	0.0159963	0.0680315	0.0733787
D16Ertd472e	M3	red	-0.123171	-0.325578	-0.353344	0.220782	0.0738737	-0.0762048	0.14562
Rap2a	M1	turquoise	0.195392	-0.0467169	-0.16736	0.0167493	0.079044	0.139091	0.154689
Tmbim1	M2	yellow	-0.0603509	-0.219791	-0.217524	0.140685	0.113594	0.0619175	0.118759
Gm10076	M4	blue	-0.111426	-0.165414	-0.100005	0.179351	0.137749	0.0655879	0.160974
Plekha5	M6	brown	-0.0981223	-0.0794787	-0.00979974	0.136752	0.0655092	0.174068	0.0829435
Gm6377	M1	turquoise	0.0858882	-0.0862959	-0.154241	0.0492898	0.00732043	0.0544453	0.0667993
Slc3a2	M2	yellow	-0.0778547	-0.224928	-0.155998	0.179923	0.129011	0.166099	0.15238
Cd86	M3	red	-0.038011	-0.192259	-0.20409	0.12216	0.0489936	0.0784815	0.177623
Mylip	M1	turquoise	0.131412	0.00680274	-0.0754853	-0.0305126	-0.0664167	-0.00736823	0.0149826
Sub1	M2	yellow	-0.176406	-0.530079	-0.306516	0.583808	0.237804	0.205038	0.302102
Zfp704	M5	green	-0.0232459	-0.0869056	-0.0549423	0.0571624	0.061733	0.0921186	0.0746005
Gimap3	M5	green	0.0636923	0.0136232	-0.0142273	-0.0570548	0.0744985	0.0162379	0.00879692
Egr3	M5	green	-0.0204117	-0.114993	-0.0844552	0.021951	0.0923806	0.0711246	0.0499644
Irf7	M4	blue	-0.0424259	-0.102595	-0.0761026	0.196505	0.133203	0.124817	0.101696
Uap1	M3	red	0.00261356	-0.160956	-0.159974	0.110405	0.0401133	0.0433123	0.0212754
Frmd4b	M6	brown	-0.0355091	-0.0200677	0.0389147	0.0545765	0.0520821	0.0589187	0.0288337
Pim2	M1	turquoise	0.0285933	-0.0302765	-0.0730184	0.0113217	0.0303728	0.0187086	0.0292903
Hist1h3d	M5	green	-0.0503091	-0.118843	-0.102893	0.0445257	0.0119746	0.0192432	0.0561853
Ggct	M1	turquoise	0.0877589	0.0475378	0.0163461	-0.0211766	-0.00525202	0.036497	-0.0249294
Klf10	M1	turquoise	0.140186	0.00240848	-0.0408763	0.00758351	0.0960112	0.136919	0.118437
Jag1	M1	turquoise	0.0240418	-0.0110845	-0.0782949	-0.0073241	-0.0876319	-0.0855345	-0.0217386
Cntln	M4	blue	-0.0132492	-0.0103369	0.0510586	0.0271525	-0.0382433	0.0699025	0.0217227
Chchd10	M1	turquoise	0.027668	-0.0624348	-0.0847318	-0.00460476	0.0658356	0.129377	0.0723054
Ankrd37	M1	turquoise	0.0280578	-0.0609234	-0.113121	0.0597438	0.0442826	-0.0245284	0.056964
Fh1	M4	blue	-0.108907	-0.128793	-0.00969781	0.228346	0.102837	0.10717	0.117635
Sept11	M5	green	-0.0150327	-0.0623458	-0.0766228	0.0836263	0.144351	0.12218	0.088925
Pinx1	M6	brown	-0.00645549	0.00571527	0.0372693	0.0859529	0.0741937	0.130098	0.0456198
Mettl1	M6	brown	-0.0404626	-0.050417	-0.0162812	0.0696807	-0.000328489	0.113907	0.0446883
Ndufaf2	M1	turquoise	0.00834332	-0.0102077	0.0381188	0.0307484	0.0353964	0.0217185	-0.0386171
Ms4a6b	M4	blue	-0.159338	-0.159636	0.0585329	0.455403	0.150197	0.223098	0.170076
Gan	M4	blue	-0.0300431	-0.0458374	0.0250139	0.113375	0.064722	0.0899678	0.079498
Slfn1	M6	brown	-0.0918881	-0.0216059	0.102509	0.199957	0.0325149	0.115212	0.0574485
Pdk3	M4	blue	-0.118233	-0.196441	-0.120734	0.229287	0.0637478	0.0639682	0.110154
Ankrd12	M1	turquoise	0.0351084	-0.0451616	-0.0589388	0.0212576	0.144285	0.128294	0.0950221
Cstb	M4	blue	-0.233498	-0.313582	-0.171713	0.45812	0.116	0.142917	0.201568
Rpl12	M4	blue	-0.148671	-0.421869	-0.233425	0.571185	0.297856	0.337882	0.419749
Zfand2a	M6	brown	-0.01727	-0.0280954	0.00443704	0.0747772	0.0513089	0.0455006	0.0375062
Ptms	M1	turquoise	-0.0399024	-0.167483	-0.107745	0.186716	0.168934	0.193777	0.18531
Gla	M6	brown	-0.0435833	-0.0956346	-0.0555915	0.0990831	0.0981378	0.217277	0.0799756
S100a4	M4	blue	-0.205685	-0.416704	-0.156155	0.676253	0.325347	0.288227	0.324181
Il16	M6	brown	-0.0533665	0.0749937	0.172053	0.0923563	0.0728136	0.179025	0.0722879
Bend4	M5	green	-0.00328334	-0.144571	-0.132329	0.00879957	0.141708	0.0665037	0.108463
Pdlim1	M4	blue	-0.21325	-0.255877	-0.0905147	0.410579	0.130485	0.117187	0.165599
Hfe	M1	turquoise	0.373834	0.188093	0.0173393	-0.11877	-0.030336	0.0604856	0.043904
Arhgap5	M1	turquoise	0.0166655	-0.0880747	-0.0688201	0.0375854	0.0933613	0.0882556	0.0965889
Vps18	M1	turquoise	-0.0111045	0.0763661	0.0985759	0.0302824	0.0430591	0.06946	0.0184693
Ccdc34	M4	blue	-0.0365182	-0.11757	-0.0607705	0.122761	0.0418959	0.0876463	0.0647475
Adgre4	M1	turquoise	0.531573	0.283166	-0.0104292	-0.283206	0.0377514	0.0682944	0.0152222
Arl5b	M2	yellow	-0.026478	-0.14408	-0.116168	0.0981961	0.189179	0.0938628	0.0979353
Tbc1d2b	M1	turquoise	0.0841027	-0.0113678	-0.048841	0.0347723	0.0877027	0.103323	0.0475002
Bmp2k	grey	grey	-0.0491231	-0.142655	-0.0921283	0.146246	0.0126606	0.0806233	0.11532
Glul	M4	blue	-0.15081	-0.200743	-0.0802138	0.307673	0.124318	0.117014	0.0900741
Pfkfb3	grey	grey	-0.0482761	-0.116471	-0.0843477	0.081017	0.073455	0.0526014	0.113443
Olfm1	M4	blue	-0.184633	-0.223366	-0.0323012	0.318516	0.147725	0.130588	0.118992
Atp6v1b2	M6	brown	-0.100028	-0.135795	-0.0465339	0.294247	0.0904968	0.117026	0.170298
Kdm6b	M3	red	-0.0347229	-0.509285	-0.564579	0.308516	0.20976	0.0986549	0.24175
Gpr35	M2	yellow	-0.203253	-0.483093	-0.38173	0.361968	0.0618567	-0.021725	0.186867
Dot1l	grey	grey	-0.0741847	-0.181164	-0.177462	0.0757965	0.000512083	0.0648576	0.16874
Zfp62	M1	turquoise	0.0336269	-0.0479566	-0.0883301	0.0499366	0.0233573	0.0187852	-0.00338481
AC149090.1	M1	turquoise	0.0598523	-0.00296485	-0.0214428	0.0108473	0.0126987	0.122431	0.0313669
Ccl22	M6	brown	0.0179573	-0.0268999	-0.0215218	-0.021203	-0.00728388	-0.00044852	0.0058791
Letm2	grey	grey	-0.0124564	-0.0236575	0.0192118	0.0315316	-0.00655858	0.0670014	0.0183326
Oas3	M4	blue	-0.109983	-0.132879	-0.0762889	0.171329	0.0665176	0.101561	0.111019
B430306N03Rik	M1	turquoise	0.155364	0.0677961	-0.000766483	-0.0509505	0.0304961	0.0212829	0.03192
Fosl2	M2	yellow	-0.142905	-0.586965	-0.431427	0.419877	0.143969	0.0184461	0.217101
Wdr76	grey	grey	0.0140098	-0.0364616	-0.0455306	0.00764485	0.0276058	-0.0134023	0.0828744
Etfbkmt	M4	blue	-0.0290941	-0.0829522	-0.0484366	0.0817536	0.0417306	0.0245276	0.0220663
Hist1h1a	M6	brown	-0.0212651	-0.0205183	0.0644664	0.0631262	0.0200297	0.0716613	0.0192636
Plcxd2	grey	grey	-0.00347004	-0.0516962	-0.0277285	0.059622	0.0435715	0.0492293	0.11102
Nmrk1	grey	grey	-0.0299741	-0.0382476	0.00940565	0.0679177	-0.0299047	-0.00405246	-0.0209245
Golgb1	M5	green	-0.0355033	-0.149932	-0.128988	0.108464	0.179338	0.0853916	0.100543
Plk2	M1	turquoise	0.0379738	0.041845	0.00893747	-0.0340625	-0.0203003	0.0666682	-0.00770314
P2ry14	M2	yellow	-0.028507	0.000162437	-0.020396	-0.0526769	-0.010092	0.0650168	0.00587767
Nudt17	M2	yellow	0.00687195	-0.0409299	-0.0299252	0.000151261	0.0133299	0.00418504	0.0175248
F7	M5	green	-0.00890396	-0.0556302	-0.044442	0.0354302	0.00874277	0.0711653	-0.00326525
Plat	M2	yellow	-0.0133217	-0.0612984	-0.070672	0.0128267	-0.0124582	0.0387904	0.0538964
Relb	M1	turquoise	0.057132	-0.0995073	-0.151619	0.0316955	0.0607252	0.0685067	0.0674708
Insig1	M5	green	-0.0268739	-0.0985625	-0.125833	0.14283	0.227542	0.182979	0.117654
Rbpms	M1	turquoise	0.416678	0.232947	0.0116375	-0.266391	0.0109942	-0.00111798	0.000190867
H2afy	M4	blue	-0.00513521	-0.345285	-0.140688	0.420648	0.231362	0.202137	0.274067
Ppfibp1	M1	turquoise	0.0100586	-0.0629127	-0.0714944	0.0196237	0.0496094	0.0580568	0.0681976
Dhdh	grey	grey	-0.0388514	-0.0573114	7.40086e-05	0.120758	0.0457938	0.039195	0.0443265
Nrarp	M1	turquoise	0.158169	0.0447649	-0.0509259	-0.0769704	0.0459898	0.0207715	0.0545851
Cd37	M1	turquoise	0.0837741	-0.0556989	-0.0683958	0.0427492	0.0879093	0.17041	0.106397
Tmem64	M1	turquoise	-0.00328448	-0.0781581	-0.0886364	0.0508448	0.00847429	-0.00509498	0.0890643
Dusp1	M3	red	-0.0304203	-0.502107	-0.437437	0.376604	0.246206	0.119538	0.271109
Wdr75	M6	brown	-0.023672	0.00575617	0.0281426	0.0245119	0.117811	0.103242	0.00403079
Phlda3	M1	turquoise	0.152744	0.115405	0.0554565	-0.0916006	0.024955	0.00326377	0.0298705
Fcrl1	M1	turquoise	0.0958549	-0.0402089	-0.0994967	-0.0534292	0.0648351	0.148236	0.0485059
5830432E09Rik	M4	blue	-0.0366226	-0.0232349	0.0132937	0.0283182	-0.046171	0.0132311	-0.00225509
Wdr4	M5	green	0.0340291	-0.0232864	-0.0211746	-0.0412092	0.0709534	-0.0313355	-0.0402949
Xlr	M5	green	-0.00223437	-0.0838093	-0.0755301	0.0305697	0.11474	0.0603372	0.109983
Tspo	M4	blue	-0.167129	-0.439462	-0.190643	0.559766	0.20611	0.257929	0.286077
Mrc1	M5	green	-0.0136565	-0.117972	-0.0883018	0.0527398	0.0379042	0.125973	0.057652
Stxbp1	M2	yellow	-0.0647018	-0.130834	-0.0914808	0.0861637	0.025724	-0.0365506	0.0786516
Itga6	M1	turquoise	-0.0101486	-0.0243477	0.0202759	-0.000240977	0.10397	0.0323181	0.0607871
Dpy19l3	M6	brown	-0.0516775	-0.0435982	0.0163689	0.0543673	0.0825055	0.0850538	-0.00137634
Dbp	M6	brown	-0.053427	-0.0504104	0.00894338	0.0915291	-0.0263962	0.0316214	-0.00824235
Spic	M1	turquoise	0.058042	0.027599	-0.00335183	0.00379512	0.105887	0.12995	0.0199655
1700016P03Rik	M1	turquoise	-0.0284189	-0.089415	-0.108092	0.00933078	0.00934788	-0.00273505	0.117061
Abcc3	M4	blue	-0.0729202	-0.065986	-0.0170279	0.078884	0.0223541	0.0556754	0.0891336
Foxred2	grey	grey	-0.0644874	-0.0529172	-0.0187875	0.0772097	0.0271248	0.0093952	0.0254556
Epas1	grey	grey	0.046538	-0.0064552	-0.00141321	-0.0129922	-0.0385648	-0.0368492	-0.020707
Ablim1	M1	turquoise	0.0980363	0.0312218	-0.00402464	-0.0464534	0.00661174	0.111471	0.0222369
Nudt4	M1	turquoise	0.051433	-0.158833	-0.15978	0.108832	0.105942	0.0968981	0.158869
Ctsd	M6	brown	-0.0985948	-0.124615	-0.0174713	0.316937	0.0922707	0.136011	0.161748
Fgfr1op	M2	yellow	-0.0966925	-0.147963	-0.0732374	0.125063	0.143312	0.117147	0.067438
Ly6i	M1	turquoise	0.242351	0.123353	-0.0231579	-0.131064	0.0527391	0.0738183	0.0548077
Stard4	M1	turquoise	0.0470793	-0.0303352	-0.0465312	0.0447891	0.106974	0.108256	0.0337393
Ifi203	M4	blue	-0.107166	-0.120405	-0.0331154	0.229713	0.0253558	0.156858	0.118608
Rbm44	M2	yellow	-0.0403848	-0.0695786	-0.0575923	0.0803126	0.0712145	0.0262212	0.0485877
Sox13	M6	brown	-0.00545298	0.00398329	-0.0042476	0.00424097	-0.0270759	0.0945856	-0.00102912
Mybph	grey	grey	-0.0398633	-0.0775355	-0.076936	0.0474625	-0.0235528	-0.0705802	-0.0251912
Gm7694	grey	grey	-0.0260497	-0.094986	-0.0967883	0.0588395	-0.0241921	0.0452804	0.0867634
Gm13199	M2	yellow	0.00136893	-0.0450477	-0.0541379	0.0438826	0.113805	0.0555927	0.0277342
Il1f9	M6	brown	0.0162904	-0.0705803	-0.0805235	0.0508588	0.00638878	0.0641001	0.0829077
Dab2ip	M5	green	0.00590425	-0.010552	-0.0132159	0.0123064	0.00945291	0.0222621	-0.0130723
Exd1	grey	grey	-0.040422	-0.0559493	-0.0228686	0.0844981	0.087273	0.0801777	0.0884681
Fastkd5	M2	yellow	-0.0555447	-0.072515	-0.0294079	0.0627153	0.00515825	0.00812908	0.00615081
Cdc25b	M4	blue	-0.0351519	-0.0533647	8.33655e-05	0.0548496	0.075642	0.101901	0.0298653
Napb	M4	blue	-0.0134971	-0.00806061	0.0274848	0.050588	0.0280283	0.0517411	0.0110936
0610039K10Rik	M1	turquoise	0.0676541	0.0602493	0.028672	-0.0342377	0.0238704	0.0406246	-0.0264441
Bbs7	grey	grey	-0.0196251	-0.0285279	-0.01753	0.0440299	-0.00462929	0.00881255	-0.0154566
Cryz	grey	grey	-0.0561546	-0.0481423	0.022249	0.0837578	0.0945911	0.0715182	0.0926959
Patj	M1	turquoise	0.0435094	0.0308214	0.00553002	-0.0151153	-0.0698766	0.01718	-0.0561875
9930104L06Rik	M6	brown	-0.023935	-0.0153523	0.0310447	0.0696544	0.0453624	0.0636946	0.0213663
Adam22	M2	yellow	-0.0186184	-0.0811671	-0.0457234	0.0431134	-0.0004578	0.00762444	0.0418399
Zfp605	grey	grey	0.00243124	0.0375342	0.0344072	0.000842811	0.0152523	-0.0264376	0.0234246
Alkbh4	M6	brown	-0.0587187	0.0404491	0.0889822	0.0542195	-0.0204826	0.072659	0.00569929
Gm27019	M2	yellow	-0.0518296	-0.0842059	-0.0680576	0.0711915	0.088063	0.0245224	0.052317
Tcaf1	M6	brown	0.0257169	0.00144062	0.0442131	0.00793782	-0.0045116	0.00668452	0.0537122
Hoxa7	M6	brown	-0.014803	-0.0137631	-0.00942395	0.0383127	0.0658658	0.0582057	0.122108
Txnrd3	M5	green	0.003723	-0.0403151	-0.0609848	-0.000172976	0.0264049	0.0390955	0.0475412
Casc1	M5	green	0.0170851	-0.065861	-0.0884575	0.0225865	0.0437328	0.0702071	0.0622487
Ceacam10	grey	grey	0.0135999	-0.101611	-0.120927	0.0448769	0.0756162	0.0830622	0.0934807
Gm35363	M5	green	0.047084	-0.0414228	-0.0682468	-0.0146666	0.0645257	0.0555043	0.0924705
Wee1	M5	green	-0.00688268	-0.0977472	-0.0890334	0.0147645	0.0139437	0.0707492	0.0565029
Tspan4	M6	brown	-0.0565232	0.0103421	0.0295744	0.0606841	0.00417561	0.0443835	0.0392365
Zdhhc2	grey	grey	-0.0262898	-0.00850899	-0.0271523	0.0410895	0.0506506	-0.00500827	0.0318431
Tssk6	M1	turquoise	-0.00376684	-0.0403378	-0.0433495	-0.0139672	0.0270611	-0.0147767	0.0194345
Map10	M4	blue	-0.0212672	-0.0590218	-0.0222726	0.087006	0.00724284	0.0275017	0.071864
Fbxl12os	M2	yellow	-0.0604937	-0.0824683	-0.0337803	0.0614189	-0.0587061	-0.00599054	0.00486219
Mcam	grey	grey	-0.0309051	-0.120246	-0.136017	0.0836561	0.0728347	0.0351542	0.0167861
Rec114	M6	brown	-0.0036151	0.0449434	0.0574356	0.0513869	0.000387375	0.0323206	-0.00192744
Gnb5	grey	grey	-0.0409435	-0.109496	-0.0854565	0.100012	0.0616092	-0.00297128	0.0667767
Gm28229	M3	red	0.020858	-0.0627962	-0.108981	0.0233706	-0.0196628	-0.010747	0.0120751
Hyal1	M1	turquoise	-0.0139729	-0.0623392	-0.0612338	0.00834856	0.032623	0.0822471	0.0680752
Nicn1	M6	brown	-0.00964844	0.032036	0.0574083	0.022718	0.0513551	0.109251	0.0582021
Tmem158	M3	red	0.0158146	-0.0409427	-0.0825541	-0.014287	0.0914754	0.00637683	0.0827731
Lgalsl	M6	brown	-0.0065518	0.00731401	-0.0051671	0.0052827	-0.0213829	0.0246453	-0.0114481
Rtn4rl1	grey	grey	0.0247538	-0.00564117	0.00307577	0.0188384	0.0608321	0.00577286	0.00269542
Smyd4	M1	turquoise	0.0248961	0.0075045	0.0137245	0.0113553	-0.0176922	-0.0208856	0.074854
Fam57a	M5	green	0.00478706	0.000463155	-0.0357666	-0.0178575	-0.00534758	0.0132384	0.0412902
D030028A08Rik	M2	yellow	-0.057252	-0.0924829	-0.0701225	0.0512288	-0.024551	0.0247771	-0.0121851
Rrm2	M1	turquoise	0.111202	0.0728392	-0.012353	-0.0809171	-0.0596473	-0.0521011	-0.0511591
Adam4	M1	turquoise	0.00776764	0.0305953	0.0274885	0.0278291	0.00886809	-0.0289159	-0.00973753
Dnase1l3	M6	brown	-0.0495754	0.0259279	0.0429256	-0.0572697	-0.0100382	0.0132773	0.0639423
Gm7945	M2	yellow	-0.00772564	-0.00734678	0.0437296	0.0143939	-0.0290441	0.00883589	0.0225007
Lrrc63	M6	brown	-0.0178572	-0.0549022	-0.0584283	0.0122707	0.0505429	0.0163398	0.0506648
Soat2	M2	yellow	-0.0052185	-0.10803	-0.110545	0.0494835	0.117343	0.100847	0.134535
1300002E11Rik	M4	blue	-0.00956912	-0.00827123	0.0285854	0.0568847	-0.015071	0.0531431	0.0504999
Myom1	M1	turquoise	0.0614006	0.0233025	-0.0238736	-0.0479673	0.00672192	-0.00699426	0.0120387
Morn2	grey	grey	-0.0142413	-0.072835	-0.0641884	0.0107948	0.0728212	0.0471343	0.065345
Jcad	M5	green	-0.0298556	-0.0531197	-0.040176	0.0267614	0.0620401	0.0997139	0.0184099
Osbpl1a	M6	brown	-0.0565234	-0.019251	0.0455622	-0.0119425	-0.00993346	0.00722883	-0.0592558
Cxxc5	M5	green	-0.00393978	-0.0898805	-0.105393	0.0132465	0.0286693	0.0818469	0.0308074
Lpar4	M1	turquoise	0.0951363	0.0660457	-0.0126299	-0.0789943	-0.0188448	-0.00999048	0.0224096
AC168977.1	M3	red	0.0329844	-0.0320433	-0.0791239	0.01309	-0.0126544	-0.0271679	0.0009272
Pira2	M4	blue	-0.23207	-0.306099	-0.101464	0.495193	0.116232	0.122913	0.189905
AI839979	M4	blue	-0.262787	-0.264908	-0.0711304	0.369726	0.00381206	0.0433023	0.124237
H2-Q7	M1	turquoise	0.139042	-0.01653	-0.0826348	-0.0249292	0.0789687	0.12724	0.0780102
D430042O09Rik	M6	brown	-0.0378094	-0.0176241	0.0324807	0.0522468	0.01824	0.0860066	0.0305335
Slc16a6	M4	blue	-0.162493	-0.105807	0.0247564	0.205266	0.0634115	0.0614824	0.042281
Rabgap1l	M4	blue	-0.0891029	-0.146984	-0.07719	0.158251	0.0381375	0.0401522	0.00208078
Taf11	M1	turquoise	-0.0126427	-0.0501042	-0.0257808	0.0928589	0.0615934	0.0709208	0.0562147
Acap1	grey	grey	-0.013625	-0.1038	-0.0791519	0.0513443	0.0922242	0.139784	0.109429
Ms4a4b	M6	brown	-0.0570642	0.0154612	0.0728796	0.0384438	0.0342709	0.124359	-0.00658604
Kmo	M6	brown	-0.0431242	-0.0761154	-0.0215947	0.0483682	0.0212156	0.04489	0.113278
Shprh	M1	turquoise	-4.88876e-05	-0.0205593	-0.0069582	0.0470308	0.0131249	0.0554141	0.0399683
AW011738	M1	turquoise	0.0479719	-0.0795099	-0.0767987	0.0639007	0.0611984	0.101072	0.0937615
Spata13	M1	turquoise	0.298588	0.107194	-0.0335959	-0.157847	0.0493442	0.00947584	-0.000523066
Tsc22d3	M1	turquoise	0.205094	0.103242	0.112117	0.0580245	0.119538	0.309258	0.139402
Ninj1	M2	yellow	-0.241063	-0.461046	-0.378731	0.440357	0.141565	0.0213568	0.236346
Gcsh	M2	yellow	-0.0809723	-0.125443	-0.0584644	0.133728	0.0688168	0.0233338	0.155226
Gyg	M3	red	0.0244737	-0.171935	-0.13927	0.240845	0.100281	0.0671363	0.166668
Rps2	M4	blue	-0.0563645	-0.375112	-0.208979	0.516208	0.318082	0.333485	0.373869
Oxct1	M1	turquoise	0.0275634	-0.0660721	-0.0842286	0.013638	0.0777089	0.0692619	0.10792
Ass1	M3	red	0.0961914	-0.103708	-0.169977	0.042226	0.0986095	0.096076	0.159697
Lgals3	M4	blue	-0.252637	-0.493153	-0.183597	0.712439	0.309835	0.262333	0.304648
C5ar1	M3	red	0.153716	-0.150158	-0.300255	0.0879153	0.120953	0.0611651	0.103975
Hip1	M1	turquoise	0.342075	0.200828	-0.0442713	-0.21814	0.036522	0.0490235	0.0255469
Pkp3	M1	turquoise	0.009806	-0.0340381	-0.0063049	0.00201999	-0.00313657	0.0237863	0.02871
Treml2	M6	brown	-0.00259832	-0.0259466	-0.00235287	0.0778207	0.0758992	0.13725	0.0665265
Gm50240	grey	grey	-0.0209631	-0.0617388	-0.00207188	0.0122741	0.0350861	0.100741	0.0322541
Nacc2	M6	brown	-0.0627112	-0.00692779	0.00957565	0.118408	0.043731	0.0903444	0.00945645
Sdf2l1	M6	brown	-0.0211938	-0.0734396	-0.0433409	0.133371	0.107332	0.197503	0.125867
Mcemp1	M4	blue	-0.257311	-0.381971	-0.185149	0.506745	0.0449343	0.118141	0.220203
Zfp36	M1	turquoise	0.0453273	-0.335198	-0.285121	0.325111	0.227088	0.238035	0.242192
Chka	M1	turquoise	0.00211415	-0.0482092	-0.0333889	0.0486915	-0.00549837	0.0564896	0.0323859
Gm1673	M4	blue	-0.16392	-0.169349	-0.0497427	0.314647	-0.0309951	0.0496432	0.112135
Got1	M3	red	-0.0789953	-0.266462	-0.275356	0.176285	0.100199	0.115367	0.184464
Klf7	M3	red	0.0614117	-0.0888982	-0.172007	0.0438801	0.112223	0.0377323	0.118418
Vwf	M1	turquoise	0.170855	0.119693	0.00315408	-0.125603	-0.0203298	-0.0786154	-0.0789518
Rab36	M4	blue	-0.0863762	-0.0614514	0.0123988	0.141554	0.0630863	0.116317	0.0533343
Gfod1	M3	red	-0.00242323	-0.245965	-0.378282	0.0796207	0.110212	-0.0074937	0.0982681
Mpzl3	M1	turquoise	0.0545648	-0.0652342	-0.0960481	0.0621527	0.00787702	0.0660037	0.0407805
H2-Q4	M1	turquoise	0.142063	-0.00432948	-0.0375628	-0.0298082	0.0190215	0.161247	0.0857924
Stat5a	M1	turquoise	0.0136544	-0.068543	-0.079753	0.0265646	0.0361083	0.0831003	0.142801
Lpp	M1	turquoise	0.141574	0.0205462	-0.0347912	-0.0498603	0.035599	0.0673806	0.0788054
Prdx5	M4	blue	-0.211046	-0.406827	-0.151137	0.679354	0.220487	0.174742	0.221952
Hexb	M1	turquoise	0.0196619	-0.120745	-0.0697718	0.160964	0.0606253	0.112836	0.16762
9830107B12Rik	M4	blue	-0.218558	-0.186476	-0.0222743	0.340062	0.0688285	0.100482	0.0971053
C130050O18Rik	M1	turquoise	0.104195	0.0784281	0.0735306	-0.00384006	0.0657495	0.0683652	0.0637411
D830025C05Rik	M4	blue	-0.049003	-0.0269349	0.00939143	0.0724625	0.0423975	0.0897198	-0.000842297
Ddx28	grey	grey	-0.0501708	-0.108582	-0.0957059	0.116533	0.00142323	-0.0276042	0.0477159
Snapc1	M3	red	-0.0481775	-0.0956287	-0.0696167	0.0894164	-0.0343614	-0.0280153	0.0533227
Ackr3	grey	grey	0.0104468	-0.024344	-0.013681	-0.00364663	-0.0214294	-0.0173312	0.0109568
Chac1	M6	brown	-0.0514865	0.0179815	0.0342234	-0.0234781	-0.036714	-0.0110101	-0.000250284
Klrc1	M6	brown	0.00482061	-0.00472877	0.0416804	0.0546859	0.0352492	0.0428663	0.0143383
2200002D01Rik	M6	brown	0.0163098	-0.0252576	-0.0112652	-0.0123183	0.0164916	0.017113	0.0261281
Mki67	M6	brown	-0.026099	-0.0470741	-0.0394804	-0.00885313	-0.0201477	-0.00344361	0.0334616
Gzmb	M6	brown	0.00213319	-0.019796	0.0261589	0.0503276	0.0351555	0.0277212	0.0189192
Sh3bp5	M6	brown	-0.0024731	-0.0247089	0.0227795	0.143	0.0577354	0.080225	0.0275267
Stard7	M4	blue	-0.0159829	-0.081862	-0.076174	0.0996072	0.0658052	0.0676326	0.0580105
Txndc11	M1	turquoise	-0.0148546	-0.055805	-0.0323285	0.120835	0.0282065	0.0943	0.0988881
Fam114a1	M1	turquoise	0.0164672	-0.0306988	-0.0296634	0.0353607	0.0730178	0.0168415	0.0493572
Igtp	M4	blue	0.0374335	-0.00771556	0.0393622	0.036366	-0.0283252	0.0957248	0.11761
Gk	M1	turquoise	0.167497	-0.0189853	-0.128634	-0.00699768	0.0436587	-0.0452683	0.0365744
Igf1r	M1	turquoise	-0.00862965	-0.135571	-0.132211	0.106772	0.0999484	0.0485223	0.102464
Vipas39	M6	brown	-0.0402577	-0.0340586	-0.0177324	0.108303	0.0798268	0.0649122	0.0632989
Grap	M3	red	0.0418109	-0.0507724	-0.0841583	-0.0229578	0.0326667	0.039278	0.0329434
Polr3a	grey	grey	0.0217931	-0.010471	0.00116693	0.020712	-0.00246843	0.0329158	-0.0371918
Tab3	M4	blue	-0.038396	-0.00582616	0.0370778	0.0545342	0.0115708	-0.00793432	0.0528993
Nfia	M4	blue	-0.0931956	-0.136149	-0.0824085	0.126617	-0.011922	0.0254182	0.0300267
Cep76	grey	grey	-0.0226196	-0.0907873	-0.0430214	0.0406093	0.00514948	-0.0616998	0.00446703
Syt11	M1	turquoise	0.0497959	-0.066242	-0.0940076	0.0528587	0.0206125	0.0179034	0.0701634
Usp46	M6	brown	-0.00699915	-0.022106	-0.020639	0.0518594	0.0453224	0.03972	0.0536604
Cdkn1c	M1	turquoise	0.050046	-0.0108685	-0.0547674	0.0140514	0.00631417	-0.0235103	0.0613306
Tnfsf13b	M6	brown	-0.0261603	-0.0601371	-0.0358988	0.046737	-0.0125419	0.00962198	0.0163974
Dubr	M1	turquoise	0.0420246	0.0181635	-0.0496923	-0.00687226	-0.0349578	-0.061219	0.0212677
Rras2	M6	brown	-0.0525039	-0.0879501	-0.0321492	0.06705	0.0503708	0.06361	0.00716661
Mss51	grey	grey	-0.0378206	-0.0786095	-0.0494838	0.0825293	0.0347886	-0.0240298	0.0525321
Nufip1	M1	turquoise	-0.0284493	-0.0337711	-0.00966525	0.0776471	0.0430348	0.0211746	0.0327549
Chml	M2	yellow	-0.0434752	-0.0921077	-0.0567896	0.107489	0.0404466	0.0437234	0.126612
Cbfa2t3	M1	turquoise	0.225094	0.168593	0.092505	-0.0849024	0.151295	0.220886	0.123859
BC005561	M1	turquoise	0.056108	0.00760346	-0.022648	-0.000386009	0.0861526	0.116039	0.0561299
Ms4a7	M4	blue	-0.201041	-0.209176	-0.0720899	0.29494	0.0623851	0.0461871	0.0825799
Havcr2	M1	turquoise	0.179076	0.0177452	-0.0617714	-0.103037	7.01783e-05	0.0180329	0.0562048
Glcci1	grey	grey	-0.0395885	-0.132495	-0.0917623	0.0396608	0.0888539	0.0565986	0.13291
Tubb4b	M1	turquoise	0.0416128	-0.108046	-0.168583	0.0734273	0.0765677	0.150675	0.142721
Ldhb	M4	blue	-0.237605	-0.199513	-0.00364164	0.405909	0.0860432	0.143415	0.119437
Wdfy4	M3	red	0.0901464	-0.0943244	-0.122448	0.0282178	0.0220848	0.0614156	0.160293
Zfp703	M3	red	-0.0564478	-0.264763	-0.269003	0.188654	0.0515126	-0.00546245	0.110922
Rab21	M1	turquoise	-0.0226819	-0.196551	-0.160049	0.16158	0.0459139	0.0412762	0.0965552
Nfe2l2	M3	red	0.176651	-0.316085	-0.457772	0.145069	0.113216	9.75823e-06	0.202114
Impdh2	grey	grey	-0.0640677	-0.168966	-0.124716	0.142935	0.111943	0.156136	0.250019
Tob1	M3	red	-0.0128215	-0.173272	-0.182502	0.121927	0.103131	0.0922547	0.134217
Prdx2	M4	blue	-0.225555	-0.344841	-0.166411	0.446286	0.149141	0.110241	0.235406
Gm47664	M1	turquoise	0.0755418	-0.0249031	-0.0516387	0.00247587	0.060671	0.0486405	0.0594031
Nt5c3	M6	brown	-0.0406838	-0.0748197	-0.0527686	0.109497	0.0858035	0.13052	0.0747834
Srpk2	M6	brown	-0.085679	-0.0919816	-0.0476502	0.144889	0.0576432	0.0500208	0.0351013
Prdx4	M4	blue	-0.126706	-0.171191	-0.083455	0.229971	0.0250453	0.0731331	0.171081
Hist1h1e	M2	yellow	-0.126276	-0.259341	-0.199945	0.20881	0.162409	0.0555331	0.142288
Rgs18	M4	blue	-0.0644385	-0.097316	-0.00873963	0.15526	0.0550042	0.101193	0.0867358
Itga5	M2	yellow	-0.112159	-0.263718	-0.223179	0.128731	0.114153	0.0767045	0.093033
Ttc39b	M2	yellow	-0.0368958	-0.102073	-0.0571132	0.0793552	0.0781727	0.0482199	0.0262911
Adgrl3	M1	turquoise	0.0996456	0.0623197	-0.0190867	-0.0947556	-0.0695949	-0.0280721	-0.0133596
Myc	M2	yellow	-0.0737142	-0.127525	-0.066224	0.0918828	0.0226371	0.0553069	0.118784
Dnajb2	M5	green	0.00427087	-0.060941	-0.0542982	-0.00366607	0.106933	0.0715066	0.0423769
Ncdn	grey	grey	0.0299295	0.0264186	-0.0046216	-0.0114423	0.0473492	0.0371099	0.0984986
Ip6k3	M1	turquoise	0.16513	0.0831698	-0.0188633	-0.0927027	-0.0110069	0.0321186	0.0175547
Exoc1	grey	grey	-0.0251828	-0.0356885	-0.0366989	0.0955457	0.0474626	0.0132195	0.0446387
Antxr2	M2	yellow	-0.124008	-0.279482	-0.174114	0.201345	0.0879065	0.102639	0.175156
Plek	M3	red	0.19014	-0.341722	-0.338382	0.210076	0.155803	0.0547953	0.0782794
Gm15987	M1	turquoise	0.213848	0.11784	0.00351876	-0.0717496	0.00719838	0.00400684	0.0132906
Entpd1	M3	red	0.0518689	-0.174527	-0.242659	0.0417156	0.100258	0.0851165	0.139096
Rbmx	M1	turquoise	0.0680323	-0.0353637	-0.0640446	0.0336008	0.0151363	0.0633232	0.0878091
Zbtb10	M1	turquoise	0.10251	0.0957313	0.0685585	-0.0871173	0.0348303	-0.00108069	0.00945314
Dlg4	M6	brown	-0.0389054	-0.0473911	-0.0179163	0.0965314	0.00386977	0.00375904	-0.00104031
Map3k8	M1	turquoise	0.208877	0.136528	0.0711556	-0.100369	0.0705729	0.146592	0.0222615
Acox3	M6	brown	-0.0491794	-0.00678225	0.0577082	0.0744006	0.0935924	0.183542	0.051143
Ckap4	M4	blue	-0.182827	-0.148596	0.0123317	0.29735	0.0743689	0.101417	0.0699499
Spred1	M1	turquoise	0.19436	0.0496534	-0.0715339	-0.0889525	0.0301765	0.0522389	0.0285094
mt-Cytb	M6	brown	-0.0958334	-0.324061	-0.174438	0.289087	0.260023	0.323687	0.303183
Tut4	M1	turquoise	0.0172897	-0.19078	-0.233854	0.0768159	0.0731011	0.0934521	0.107729
Alkbh8	M3	red	-0.0273649	-0.0717221	-0.0392324	0.0661221	-0.0040303	0.0148949	0.0660268
5830428M24Rik	M1	turquoise	0.102325	0.0218554	-0.0188521	-0.0685242	0.0165359	0.0406365	0.0208613
Wdr91	M5	green	-0.0502283	-0.0210704	-0.0167712	0.0160492	0.0535913	0.0793593	0.0396035
Ikzf2	M6	brown	-0.0497711	-0.00601221	0.0287404	0.0375123	0.0475571	0.0663529	0.0224012
Ppip5k1	M1	turquoise	0.00779145	0.0661036	0.048622	-0.0487349	-0.0273649	0.0210858	0.0386494
Adra2b	grey	grey	0.00857096	-0.0812322	-0.0799137	0.0560777	0.0670517	0.139253	0.0854044
Grk4	M6	brown	-0.0148077	-0.0216284	0.036904	0.0627549	-0.0516374	-0.0060189	0.0433289
Gins3	M6	brown	0.020972	0.011321	0.0688329	-0.00192183	0.0347263	0.0537146	0.0373601
Abhd15	M3	red	-0.00667591	-0.0294713	0.00706697	0.00227158	0.00930945	-0.012458	-0.000837167
Rnf157	M4	blue	-0.0178655	-0.0675301	-0.0228356	0.0337578	0.0702298	0.037651	0.0404609
Rnf144b	M5	green	-0.0492197	-0.0399698	0.0203798	0.0342196	0.0842402	0.0765058	0.0188475
Spry2	M6	brown	0.00958121	-0.0979031	-0.084013	0.0687079	0.0816105	0.10236	0.0324695
2410080I02Rik	M2	yellow	0.00588431	-0.045449	-0.000283704	0.0103454	-0.00815707	0.0355765	-0.0102017
Efnb1	M1	turquoise	0.0477586	-0.0158529	-0.0332627	-0.0465883	0.0185556	0.0332484	0.0907133
Whrn	M1	turquoise	0.0569546	0.0327744	-0.0195183	-0.0597846	-0.0450012	-0.0207095	-0.0241068
C430049B03Rik	M6	brown	0.0124976	-0.00926468	-0.0151837	-0.0334815	-0.0277615	-0.029551	-0.0642151
Klhl28	M1	turquoise	0.0333932	-0.0132064	0.00590788	0.0906381	0.0455798	0.0680809	0.114794
Fzd5	M2	yellow	-0.042743	-0.125953	-0.101559	0.104347	0.0265717	-0.05407	0.0575188
Rtl8a	grey	grey	0.010454	-0.0568249	-0.0649284	0.044208	-0.0207131	0.0170407	0.135212
Dis3l2	M3	red	-0.0220118	-0.107114	-0.0932005	0.0541748	0.0359555	0.0747141	0.0770447
C5ar2	M2	yellow	-0.0509536	-0.21185	-0.150435	0.16343	-0.0205053	0.0187383	0.147569
Gusb	grey	grey	-0.0478731	-0.116012	-0.057269	0.190529	0.0959299	0.138131	0.199412
Bcl2l14	grey	grey	0.00944863	-0.0291999	-0.0205307	-0.0108626	-0.0102882	-0.00958261	0.00738701
1700120C14Rik	M5	green	-0.0191255	-0.0572572	-0.0603569	-0.00916309	-0.00328555	0.0366303	0.00782959
Tnfaip8	M4	blue	-0.0932026	-0.174863	-0.082234	0.186028	0.0974259	0.170553	0.138184
Mdm1	M1	turquoise	0.307197	0.178561	-0.0199747	-0.165384	-0.0338302	-0.0515096	-0.0056227
Ifi27	M6	brown	0.0375574	-0.0393368	-0.0452103	0.0782566	0.0625247	0.139902	0.0885822
Adora2b	M2	yellow	-0.14085	-0.269123	-0.20301	0.24218	0.058775	-0.0499912	0.142298
Synj2bp	M4	blue	-0.0133819	-0.0470401	0.0219642	0.160307	0.122766	0.120772	0.0384602
Tia1	M1	turquoise	0.0313451	-0.0588269	-0.0423283	0.0577267	0.0786405	0.0685227	0.0891798
Il4ra	M4	blue	-0.0946398	-0.188907	-0.131458	0.210674	0.135033	0.214182	0.164115
Ltc4s	M1	turquoise	0.03127	-0.0111138	-0.00656956	-0.0300645	-0.00681665	-0.00047018	-0.00578414
Unc119b	M6	brown	-0.0575549	-0.0834826	-0.030253	0.12707	0.092637	0.10638	0.0515905
Gm4258	M1	turquoise	-0.0137285	-0.0202951	0.00945626	-0.00379277	0.0115095	0.0905727	0.0564448
Accs	M1	turquoise	-0.00349037	0.00935722	0.0158799	0.0508473	0.0597598	-0.0226974	0.0803566
Nt5dc2	M4	blue	-0.0858038	-0.0926494	-0.0232989	0.166999	0.0119339	0.059697	0.0462008
Gna13	M6	brown	0.058174	-0.121909	-0.122176	0.0943717	0.110575	0.188436	0.184241
Sc5d	M4	blue	-0.0485092	-0.114809	-0.0758236	0.112598	0.104489	0.101034	0.104881
Ifi207	M4	blue	-0.148996	-0.0950157	0.0143774	0.197497	0.0435582	0.0840868	0.0474993
Trp53inp1	M4	blue	-0.013814	-0.0641384	0.000815342	0.122841	0.0744751	0.102705	0.0746407
Plaat3	grey	grey	-0.024903	-0.0938489	-0.0408411	0.105396	0.107783	0.0535263	0.0736168
Gt(ROSA)26Sor	M1	turquoise	0.0547216	-0.0835124	-0.144813	0.0109616	0.0319647	0.0164084	0.100327
2810013P06Rik	M1	turquoise	0.000316101	0.00750556	0.014097	-0.009712	0.0184524	0.0989446	0.084366
Gpat3	M2	yellow	-0.177968	-0.295432	-0.189542	0.258203	0.0190536	-0.0484526	0.128271
Rnf170	grey	grey	-0.0320961	-0.0555138	-0.00923436	0.0695756	0.0367263	0.0165884	0.0218767
Tlcd2	M1	turquoise	0.0506771	-0.0901146	-0.115304	-0.0347394	-0.000761878	0.0104973	0.0664572
Fcor	M4	blue	-0.121399	-0.137731	-0.0293009	0.184879	0.0354159	0.0508692	0.0860878
Siglecg	grey	grey	0.0227955	-0.0722558	-0.0703583	0.0224409	0.105396	0.176334	0.0662074
Zw10	grey	grey	0.0201071	-0.0526372	-0.0650149	0.0405927	0.0409338	0.0324744	0.114212
Hoxb4	M6	brown	-0.0408704	0.000571908	0.0693338	0.0680941	-0.0558717	0.00869172	-0.0194955
Mios	M4	blue	-0.0616997	-0.10637	-0.0613964	0.118802	0.0522336	0.0392884	0.0863436
Kif3a	M2	yellow	-0.0195829	-0.100458	-0.114706	0.0731227	-0.00629871	0.0650757	0.0367916
Pim3	M4	blue	-0.0406675	-0.199981	-0.169647	0.157616	0.101132	0.121448	0.129529
Arap3	M1	turquoise	0.0196497	-0.0827296	-0.0652788	0.0345336	0.0599294	0.0783022	0.0693146
H2-Q6	M1	turquoise	0.129794	0.000751784	-0.070097	-0.0512326	0.00482536	0.0735712	0.0446901
Vrk1	M4	blue	-0.132347	-0.169894	-0.0857887	0.257688	0.147585	0.111552	0.194269
Tmsb10	M4	blue	-0.236545	-0.41802	-0.15333	0.652354	0.325039	0.299935	0.294959
Tra2a	M1	turquoise	-0.0622515	-0.140845	-0.104705	0.139646	0.0475275	0.117185	0.141532
Rps6kb1	M3	red	-0.00499963	-0.10202	-0.0847143	0.100183	0.067116	0.0473894	0.113338
Aebp2	M1	turquoise	0.0531349	-0.096594	-0.14486	0.0272496	0.105411	0.0378354	0.135134
Arf2	M4	blue	-0.0734809	-0.200558	-0.189615	0.193042	0.144655	0.0797194	0.112353
Dcaf17	M1	turquoise	0.00801112	0.0317693	0.0611907	0.0237651	0.0302247	0.0578274	0.0103536
Slco3a1	M1	turquoise	0.111427	0.0228572	-0.0493693	-0.0463894	0.069415	0.0970993	0.118879
Rpl10a	M4	blue	-0.0817272	-0.417863	-0.213188	0.55521	0.294634	0.274587	0.334284
Tmem198b	M4	blue	-0.0957849	-0.100124	-0.0385108	0.119202	0.103951	0.0590207	0.0177155
Gm43462	M1	turquoise	0.0923562	0.00561652	-0.0900703	-0.0103774	0.0719192	0.0817608	-0.0141398
Gbp5	M4	blue	-0.00304945	-0.020993	0.0221339	0.0208232	-0.0118399	0.0512595	0.0736728
Rtl8b	M6	brown	-0.0561513	-0.0268297	0.0171497	0.0633405	0.0270599	0.0910581	0.14786
Golm1	M1	turquoise	0.0756667	0.0408442	0.021854	-0.0196437	0.0344794	0.00131832	0.015122
Afmid	grey	grey	-0.0394394	-0.0986577	-0.111979	0.0685189	0.0567886	0.0487526	0.190456
Cdv3	M3	red	0.0223272	-0.157205	-0.188246	0.0870818	0.0516292	0.0638226	0.0906978
Itpr1	grey	grey	-0.0350661	-0.0988076	-0.062778	0.0847069	0.119083	0.169967	0.198091
Chd7	M3	red	-0.0577567	-0.238829	-0.250786	0.108409	0.110809	0.0730192	0.0621238
Isyna1	grey	grey	-0.0443357	-0.126398	-0.0829024	0.0578115	0.122346	0.162623	0.198846
Dbf4	M1	turquoise	0.0316903	-0.00417834	-0.0165705	0.00523074	0.0854591	0.0891715	0.02494
Lpar6	M4	blue	-0.0577625	-0.128861	-0.032275	0.137917	0.133677	0.13411	0.119842
Ctsl	M4	blue	-0.129792	-0.184294	-0.0779576	0.248415	0.110845	0.115474	0.0947185
Batf3	M6	brown	-0.108193	-0.012518	0.0703533	0.16333	0.0977279	0.227665	0.102918
Flot1	M2	yellow	-0.173771	-0.295	-0.149599	0.326056	0.0772902	0.0311162	0.157937
Nifk	M6	brown	-0.0968355	-0.0356752	0.0262157	0.106414	0.0793979	0.149174	0.0739581
Rora	M4	blue	-0.059401	-0.0914917	-0.0821091	0.125812	0.106439	0.108379	0.0710101
Cblb	M1	turquoise	0.316337	0.0752863	-0.148559	-0.180665	0.00581598	-0.0281627	0.0310916
Stxbp6	M4	blue	-0.236642	-0.254538	-0.115372	0.37238	0.0590964	0.00531812	0.112473
Atg101	M6	brown	-0.0243001	-0.0396765	-0.00721866	0.182452	0.0400387	0.0601908	0.0486806
Zfas1	M2	yellow	-0.152733	-0.296523	-0.208364	0.289346	0.0953391	0.113599	0.198793
F5	M4	blue	-0.20325	-0.195391	-0.0766635	0.288538	-0.0194372	0.0231043	0.0915654
Ube2h	M3	red	-0.0346483	-0.29565	-0.298277	0.208774	0.190399	0.134156	0.213906
Icam5	M5	green	-0.0216992	-0.0534934	-0.0748818	0.0258777	0.0861021	0.090843	0.000841664
Tm4sf5	M6	brown	0.00469111	-0.00617973	0.00535247	-0.0309046	-0.00542018	-0.0030072	0.0198984
Arsb	M4	blue	-0.166779	-0.224393	-0.0908358	0.343055	0.0686446	0.0785399	0.155342
Slc28a2	M6	brown	0.0004713	-0.112794	-0.0852264	0.121093	0.0817415	0.0701132	0.0781853
1700017B05Rik	M3	red	-0.026823	-0.0623377	-0.0533321	0.0334582	0.0782576	-0.0303027	0.00831988
Nqo2	M4	blue	-0.0571529	-0.132189	-0.111155	0.142308	0.000725657	0.0399663	0.111712
Yes1	M5	green	0.0266267	-0.0183874	-0.0228162	-0.0223046	0.00667845	-0.0102081	-0.0103638
Dmxl2	M2	yellow	-0.141442	-0.269101	-0.159183	0.24294	0.0441934	0.0313525	0.113171
Rp9	M4	blue	-0.111654	-0.146159	-0.05968	0.226095	0.072059	0.032477	0.148421
Dgkg	M1	turquoise	-0.0342812	-0.12082	-0.0916298	0.109606	-0.00307622	-0.0347851	0.0963411
Dhrs7	M4	blue	-0.087217	-0.166511	-0.0915164	0.278204	0.076319	0.14171	0.150859
Syne2	grey	grey	-0.0127385	-0.0777456	-0.0884239	0.0680693	0.0606598	0.0246216	0.137982
Nudt18	M4	blue	-0.0286482	-0.0753938	-0.0365171	0.113103	0.0906973	0.0699729	0.0808864
Incenp	M1	turquoise	-0.0296958	-0.0696232	-0.0388278	0.0751356	0.0287916	-0.0280967	0.0738048
Acat2	M1	turquoise	0.0450078	0.0494033	0.0158933	-0.0287995	-0.0223619	-0.0428769	0.0155814
Rfx2	M4	blue	-0.142632	-0.168653	-0.0679382	0.240525	0.100514	0.0730026	0.0986402
Bcl6	M1	turquoise	0.127372	0.0199852	-0.00237483	4.97514e-06	-0.00474792	0.036362	0.0932827
Fbxo30	M1	turquoise	-0.00545804	-0.0429839	-0.0364868	0.0789481	0.0349645	0.045347	0.0597279
Vat1	M3	red	0.0105905	-0.154729	-0.204887	0.0717417	0.0436799	0.0474116	0.106364
Plk3	M1	turquoise	0.0350392	-0.0964715	-0.149314	0.0438493	0.0885813	0.0662193	0.0952635
Gm49041	M6	brown	-0.0811192	-0.0233221	0.043028	0.135749	0.0913631	0.161468	0.0998749
Lin9	M1	turquoise	0.0817153	-0.0144463	-0.0519944	-0.0140715	0.0102418	0.0709713	0.0730736
Tcp11l1	M4	blue	-0.0786694	-0.0374946	0.0295917	0.128544	-0.01751	0.0274876	-0.00502904
Iffo2	M5	green	0.0124406	-0.0349121	-0.00534934	0.0256496	0.125696	0.0589512	0.0147596
Plagl1	M1	turquoise	-0.00464944	-0.0926233	-0.102743	0.0134327	-0.00303143	0.0193538	0.0421468
Rsad1	M2	yellow	-0.0846638	-0.161773	-0.139446	0.0786823	0.0665665	-0.0122134	0.0101938
Zeb1	M1	turquoise	-0.0148666	-0.0840656	-0.0575	0.0126017	0.0576412	0.0558841	0.0777418
Zfp729b	M6	brown	0.020412	0.0674313	0.0469501	0.0608286	0.0695244	0.070129	0.0583357
Eif5b	M6	brown	-0.00498269	-0.0638643	-0.00562123	0.166841	0.140842	0.247931	0.167621
Arhgef4	M1	turquoise	-0.0175365	-0.032417	0.00316754	0.0428027	-0.0491721	-0.02552	0.0691154
Nck2	M1	turquoise	0.00639086	-0.0150079	-0.0284464	0.0223849	-0.00402281	0.0144509	0.0513853
Zranb3	M1	turquoise	0.0634401	-0.00131396	-0.0621408	-0.0442396	-0.000373414	-0.0494897	-0.00401173
Gm16548	M4	blue	-0.0801182	-0.0597382	-0.0321564	0.0635931	0.0011217	0.017017	0.0231038
Olfr433	M6	brown	-0.0689214	-0.0636856	-0.0621945	0.0540772	-0.0357996	0.01817	0.0197093
Otud7b	M1	turquoise	0.0203466	-0.010679	-0.0509949	0.019461	0.0103998	-0.0466687	0.0770114
Extl2	M1	turquoise	-0.0086647	-0.0064755	0.0247578	0.023746	-0.0172633	0.0216492	0.0125322
Mttp	M6	brown	-0.0248714	-0.0156288	0.0220257	0.0273802	0.0839265	0.0405853	0.0367056
Trmo	M4	blue	-0.061204	-0.0855625	0.00419764	0.104979	0.0533239	-0.0129976	0.0165618
Map3k6	M6	brown	-0.0621687	-0.0152005	0.041231	0.0691043	0.0218076	0.0589995	0.106119
Gm43577	M1	turquoise	0.0443555	0.00068739	-0.0036271	-0.0271398	0.025461	0.0080883	0.0415035
Slc2a9	M4	blue	-0.0715307	-0.090485	-0.00860954	0.116634	0.00409321	-0.0389516	0.0447099
BC051077	grey	grey	0.0347252	-0.0498527	-0.0641281	-0.0195513	0.0278616	0.0730767	0.0725791
Auts2	M6	brown	-0.035705	-0.0406041	-0.00637772	0.0447354	0.0248425	0.0649487	0.0758085
Gm45051	M1	turquoise	0.0208885	-0.0105532	0.0125249	-0.0174819	0.0013803	0.0246711	-0.0230069
Gm44067	M1	turquoise	0.0480296	0.0254575	-0.0173957	-0.0176252	-0.0383487	-0.00298063	0.0100947
St8sia1	M1	turquoise	-0.0113954	-0.0160333	-0.00683823	0.00184649	0.0929783	0.0218554	0.0287389
Ccne1	M1	turquoise	-0.0217294	-0.0335981	-0.00803151	0.0251178	0.060792	-0.00659919	0.045455
Qprt	M1	turquoise	0.0420857	0.0472154	0.0270447	-0.0263453	0.0645158	0.0603763	-0.0286098
Nradd	grey	grey	0.0275288	-0.00711793	-0.0437521	-0.000706224	0.00941481	-0.0152766	-0.0419848
Zfp873	M6	brown	0.0162761	0.0529846	0.0495175	0.0438433	-0.047748	0.0042685	-0.0479593
Slc25a35	M4	blue	-0.0340201	-0.0627244	-0.00949371	0.0353077	0.0171428	0.0150741	0.0305484
Arsg	M4	blue	-0.0504494	-0.0600374	-0.0213815	0.106058	0.0275698	0.0420334	0.0908674
Dtd2	M5	green	-0.0149197	-0.00388967	0.00587081	0.0332564	0.0511288	-0.0231163	-0.00755781
Gm30025	M4	blue	-0.0395929	-0.0772618	-0.0361683	0.0533781	-0.0255883	0.00938869	0.0536569
Chrm3	M4	blue	-0.0445816	-0.0476498	-0.00509978	0.0840833	0.0144025	-0.01694	0.0112372
Gm32401	M1	turquoise	-0.0104846	0.011304	0.0069862	-0.0389594	-0.0272607	-0.0434949	0.0191764
Zfp85	M6	brown	-0.026621	-0.00111786	0.0200962	0.0405395	0.07776	0.0370257	-0.0142063
Nudt15	M6	brown	0.0445029	0.0349141	0.0297609	0.0339772	-0.0207934	0.0254109	0.0364097
Myo10	M5	green	0.00379751	-0.0370732	-0.0334243	0.02687	0.0384655	0.0592267	0.111715
Prkn	M1	turquoise	0.0667543	0.0269931	-0.057329	-0.0194585	0.0331873	0.0343261	0.0439801
D330041H03Rik	M4	blue	-0.0497223	-0.0199685	-0.00184431	0.0623151	-0.0227576	0.0717417	0.0603893
Cd320	M1	turquoise	0.0290141	-0.0363596	-0.0624154	0.00776446	-0.0445424	-0.00825251	-0.0609479
1110020A21Rik	M1	turquoise	0.052247	0.0619433	0.0283847	-0.0176837	-0.0349153	-0.0538984	-0.0514606
Blnk	M5	green	0.0340843	-0.0764587	-0.0803562	-0.0100618	0.0579708	0.14682	0.0737929
Catip	M2	yellow	-0.0173914	-0.0490734	-0.0426691	0.00726949	-0.0430802	0.0304926	0.0223241
Cep152	M6	brown	-0.0211169	0.0377799	0.0575308	0.00899835	0.00902652	0.119945	0.00178312
Coq3	M6	brown	-0.0119954	-0.00900892	0.000728369	0.0309548	0.00436628	0.0774975	0.00583715
2010109A12Rik	grey	grey	-0.0245956	-0.0253259	0.00163893	0.0616857	0.0717213	0.0449318	0.0612814
Rad18	M1	turquoise	0.0535149	-0.00948619	-0.0669308	-0.0115811	-0.024933	-0.0178231	0.0290304
Gm44258	M1	turquoise	0.00873077	-0.0129074	-0.0072266	0.0459879	-0.0233933	0.0120568	0.0098943
Ckap2	M2	yellow	-0.0394484	-0.107587	-0.10861	0.0576394	0.032295	-0.0608409	-0.00462925
Ttc36	grey	grey	-0.0392344	-0.0378814	-0.0252134	0.0478093	0.0823863	-0.00458678	0.0242497
Trim47	M5	green	-0.0440139	-0.0838697	-0.0295417	0.0206573	0.00488707	0.0616999	-0.00353883
Serf1	grey	grey	-0.0236305	-0.0424289	-0.0222758	0.0756757	-0.0223641	0.00352186	0.00526591
Tmtc4	M1	turquoise	0.0363774	0.0433063	0.028481	-0.0221777	-0.0287409	0.041593	0.0356841
Gm49249	M2	yellow	-0.0440234	-0.0446548	-0.0284612	0.0320594	-0.0349033	0.0374805	0.0445936
Siah1b	M4	blue	-0.0059491	-0.0258314	-0.00907973	0.0406445	-0.0299406	0.00334345	0.0326421
Impact	M1	turquoise	0.0441039	-0.0680369	-0.0893319	0.0480829	0.0423886	0.0877695	0.0512356
Pilrb2	M1	turquoise	0.309832	0.133803	-0.0500972	-0.129677	0.0913649	0.041843	0.00542629
Vmp1	grey	grey	-0.0100886	-0.150501	-0.0970386	0.162314	0.0934905	0.17294	0.147652
Noc2l	M1	turquoise	-0.0441058	-0.0899661	-0.0704573	0.0609294	0.134924	0.0817272	0.0570264
Gm42941	M1	turquoise	0.0648355	0.0585236	0.0785164	0.0205628	-0.000846802	0.0226057	-0.000279609
Map2k4	M4	blue	-0.0891332	-0.174843	-0.103141	0.185319	0.101583	0.0484835	0.110915
Zc3h6	M4	blue	-0.0684046	-0.083313	-0.0147518	0.106933	0.0297828	0.00397839	0.0200849
Ergic1	M1	turquoise	0.0194907	-0.0600722	-0.0977941	0.0124936	0.00124304	-0.0028233	0.0738548
Cd22	M1	turquoise	0.0379475	-0.022496	-0.054777	-0.0176389	0.0673151	0.0580597	0.027758
Flywch1	M6	brown	0.0484723	0.0180435	0.0330719	-0.00123654	0.0315059	0.093988	0.0656196
Tcta	M1	turquoise	0.0533619	0.0223228	-0.00681639	0.0251743	0.0186912	0.0562406	0.00830452
Mettl2	M1	turquoise	0.0472825	0.0212084	0.0171827	-0.0410901	-0.0158992	-0.0101927	-0.0286191
Ptger2	grey	grey	-0.0479109	-0.117899	-0.0976686	0.103246	-0.00929062	-0.0198681	0.0240437
E230001N04Rik	M6	brown	0.0475747	0.100105	0.0875223	-0.0241371	0.0473134	0.129527	0.0358778
Gimap6	M1	turquoise	0.0852999	0.0237725	-0.0193647	-0.0416236	0.0745395	0.106812	0.000659155
Mettl16	M2	yellow	-0.0717694	-0.0787546	-0.0122772	0.0928015	0.0132784	0.100503	0.0902221
Dok2	M2	yellow	-0.0333453	-0.116965	-0.104575	0.0856352	0.0518015	0.110597	0.0839404
Prickle3	M6	brown	0.0608643	0.0071246	0.0251586	-0.0012342	0.0457061	0.0249198	0.0409733
Slc44a1	grey	grey	0.00989616	-0.0415393	-0.0282501	0.00517062	0.0574542	0.0649873	0.124363
Bmx	M1	turquoise	0.00383429	-0.0690612	-0.0790987	0.107177	0.026573	0.00559753	0.0103054
Tbrg1	M1	turquoise	0.0340944	-0.0605975	-0.0756762	0.057521	0.039223	0.09677	0.149458
Pycard	M4	blue	-0.237424	-0.254749	-0.0604269	0.461873	0.136869	0.200806	0.213875
Mthfd2	M1	turquoise	0.129091	0.00773122	-0.064625	0.00163441	0.0226844	0.0345579	0.125231
Cd80	M2	yellow	-0.0799975	-0.270272	-0.236274	0.107177	0.0159484	-0.00920296	0.114633
Btg3	M4	blue	-0.099522	-0.157589	-0.096802	0.204365	0.111477	0.089759	0.150226
Nfkbie	M2	yellow	-0.0900793	-0.291326	-0.264434	0.173509	0.113349	0.0768721	0.0571055
Lyst	M4	blue	-0.0955057	-0.144681	-0.0931228	0.203078	0.0457835	0.0651549	0.072665
Astl	M5	green	0.00471992	0.0298882	-0.00199845	-0.0724154	-0.0297742	-0.0172209	-0.031928
Col4a1	M1	turquoise	0.0848702	0.0290852	-0.021966	-0.0219591	0.0512867	0.0377303	0.0808341
Gk5	grey	grey	-0.0415562	-0.0740194	-0.0278805	0.095618	-0.0133195	0.0132429	-0.0284697
Gm9856	M1	turquoise	0.054461	0.0506627	0.0417257	-0.0481293	0.00424446	0.0276062	0.0274487
Gm17021	grey	grey	-0.0324399	-0.0625178	-0.0790449	0.028009	0.0329292	-0.0305655	0.0324849
Thg1l	grey	grey	-0.0595192	-0.0811253	-0.0219929	0.115194	0.00330427	-0.00521771	0.135747
Zfp458	M6	brown	-0.0327363	-0.0183217	0.00883532	0.0286186	0.0391917	0.0484032	0.0739075
Zfp748	M6	brown	-0.0344819	-0.0566875	0.0240033	0.0593348	-0.00782369	0.0576278	-0.00921606
Zfp955b	M4	blue	-0.0705164	-0.0560388	-0.00735266	0.0479679	0.0855961	0.00707852	0.0422627
A430093F15Rik	M2	yellow	0.0358968	-0.0569732	-0.0754771	0.000622894	0.0204512	0.015347	0.0553687
Nfil3	M2	yellow	-0.205489	-0.544055	-0.391776	0.442352	0.162553	0.0222587	0.165813
Ltb4r1	M4	blue	-0.0174035	-0.129236	-0.102024	0.255148	0.179791	0.154544	0.198672
Gng10	M2	yellow	-0.129863	-0.345471	-0.198432	0.427169	0.211824	0.203898	0.302547
Spty2d1	M2	yellow	-0.0847864	-0.295414	-0.263849	0.16174	0.130164	0.106999	0.146349
Marcks	M1	turquoise	0.339447	-0.0373554	-0.13588	-0.0217114	0.153519	0.146118	0.0999177
Nfkb1	M1	turquoise	0.173602	-0.145569	-0.195138	0.0826351	0.167396	0.154519	0.182766
Adgre1	M1	turquoise	0.0508911	-0.0804292	-0.108177	0.102235	-0.0388023	-0.0108115	0.0825608
Atpif1	M4	blue	-0.22573	-0.247674	-0.0932091	0.409374	0.213455	0.221091	0.212177
Rassf1	M6	brown	-0.0410734	-0.0902733	-0.0803087	0.159921	0.103783	0.131925	0.131809
Arl4a	M1	turquoise	0.0253081	-0.0243275	-0.0471606	0.0578955	0.0958122	0.17613	0.040971
Slc35e3	M1	turquoise	0.0383748	0.058425	0.0340674	0.0495355	-0.0216652	-0.0209444	0.00426765
Arhgef11	M1	turquoise	0.0763164	0.0148102	0.0158661	0.00643903	0.0572226	0.015601	0.0379798
Trim24	M1	turquoise	0.10007	0.0346196	-0.0318477	-0.0507743	0.00408179	0.0129806	0.0348845
Il15	M4	blue	-0.0755311	-0.0871648	-0.0310064	0.117934	-0.00337449	0.00120707	0.022092
Cpd	M1	turquoise	0.370611	0.138061	-0.0774046	-0.196864	-0.0492266	-0.0572169	0.0272182
Pdia4	grey	grey	-0.0675088	-0.135698	-0.104582	0.152744	0.156697	0.196354	0.19358
St7l	grey	grey	-0.0561774	-0.130638	-0.0746221	0.125997	0.104186	0.0771119	0.143376
Gramd3	M4	blue	-0.064073	-0.120087	-0.0732715	0.145394	0.111412	0.0976603	0.0799181
St3gal5	M1	turquoise	0.211942	0.060892	-0.0564427	-0.124004	0.0728085	0.0760455	0.0260979
Syngr2	M1	turquoise	0.0386361	-0.118747	-0.155368	0.199048	0.146143	0.212056	0.239009
Fcgr3	M4	blue	-0.21846	-0.314957	-0.100349	0.523791	0.0828608	0.132761	0.212516
Rgs3	M1	turquoise	0.254136	0.150536	0.0533055	-0.138221	0.114341	0.0861905	0.0763993
Lztfl1	grey	grey	-0.0993471	-0.155729	-0.0132143	0.210862	0.0129332	0.0397966	0.148829
Arl5a	M1	turquoise	0.0946332	0.0160348	-0.0113769	0.0286359	0.0322892	0.0575119	0.0218789
Spopl	M1	turquoise	0.0499322	0.0188788	-0.0160998	0.0298662	-0.0220448	0.0629526	0.0660521
C1qbp	M5	green	-0.0790549	-0.101501	-0.0775098	0.123645	0.130389	0.126541	0.134422
Cdadc1	M6	brown	-0.00952583	-0.049511	-0.0224938	0.113228	0.12457	0.0607268	0.0912448
Fcgr4	M1	turquoise	0.347647	0.139848	-0.0500113	-0.216825	-0.0587323	-0.0558383	-0.00830856
Cers4	M1	turquoise	0.0606118	0.0148023	-0.0228778	-0.0431007	0.0329648	0.0430179	0.00435417
Plxdc1	grey	grey	-0.0451954	-0.025305	0.00240524	0.0462947	0.00344344	0.0240041	0.135822
Lamtor3	M4	blue	-0.03187	-0.0544439	-0.0125667	0.072171	0.109743	0.10622	0.0157194
Kif23	M1	turquoise	0.144849	0.0158586	-0.0985817	-0.028557	0.0155334	0.0445059	0.0211181
Myof	M4	blue	-0.132068	-0.215011	-0.122748	0.267289	0.0800703	0.052355	0.129292
Gspt2	M3	red	-0.0200406	-0.0598272	-0.0514221	0.0760235	0.0639404	-0.00363814	0.0555124
Yod1	grey	grey	-0.0233588	-0.0637621	-0.0357213	0.0769871	0.0402179	0.0564104	0.0842714
Ap3m2	M1	turquoise	0.0522663	-0.00425293	-0.0583025	-0.00627496	0.0092951	0.0155603	0.0504735
Trim16	M6	brown	-0.0520055	-0.0758881	-0.0394461	0.0998502	0.0825172	0.0487279	0.108295
Wipi1	M6	brown	-0.00533193	-0.026416	0.0137652	0.0865712	-0.015476	0.0448672	0.0739328
Jade1	M4	blue	-0.0718442	-0.0877398	-0.0409278	0.139939	0.035651	0.0442203	0.0679153
Tob2	M3	red	-0.0878766	-0.27524	-0.278	0.232085	0.0953381	0.044943	0.160358
Esf1	M1	turquoise	0.0443004	0.0326023	0.0194103	0.00595629	-0.0192153	0.0544074	0.0892618
Gclc	M1	turquoise	0.0125883	-0.0806238	-0.0976008	0.0570767	0.0533819	0.0554277	0.0507131
Slc2a1	grey	grey	-0.0674332	-0.155453	-0.100938	0.14437	0.0939472	0.0600864	0.115061
Ctps2	M4	blue	-0.160885	-0.148448	-0.0488641	0.277657	0.0297072	0.0863849	0.0906363
Smc1a	M2	yellow	-0.0288497	-0.1856	-0.119741	0.212901	0.131857	0.102125	0.133367
Trim59	M1	turquoise	0.144762	0.0512791	-0.0204652	-0.0851495	-0.0257118	0.0374332	0.0424248
Mtus1	M4	blue	-0.118461	-0.140306	-0.0166359	0.292767	-0.0362966	0.0453767	0.091228
Mat2b	M1	turquoise	-0.00921992	-0.0898941	-0.0723099	0.15124	0.0667048	0.098825	0.0622913
Fancl	grey	grey	-0.0107943	-0.0833216	-0.0481082	0.103905	0.0478558	0.0843543	0.0974871
Tuba1c	M3	red	-0.039204	-0.29034	-0.368719	0.222589	0.134841	0.0609822	0.162574
Rest	M5	green	-0.0483407	-0.145888	-0.143101	0.149201	0.125207	0.100016	0.119139
Rpl3	M2	yellow	-0.0356232	-0.399601	-0.232308	0.51413	0.293946	0.287443	0.376624
Actg1	M2	yellow	-0.034688	-0.463888	-0.397241	0.501935	0.302086	0.175769	0.364905
Lrig2	M6	brown	0.0128451	-0.0014504	0.0197844	0.0461461	-0.00964049	0.109709	0.0191154
Map3k12	M4	blue	-0.0258854	-0.0799335	-0.0741393	0.0436587	0.109	0.102139	0.0102301
Rgl1	M6	brown	-0.0173268	-0.0635452	-0.0555645	0.0382813	0.10155	0.111787	0.0474425
Slamf6	grey	grey	0.0477261	-0.0607492	-0.0564387	0.0323442	0.0515374	0.110791	0.14939
Ccnd1	M1	turquoise	-0.00979118	-0.00685688	-0.0323523	-0.0154272	0.0302096	0.0235634	0.0621459
Papss2	M4	blue	-0.0679601	-0.0994547	-0.0320341	0.143979	0.0391712	0.061214	0.0458985
Ccdc130	M6	brown	-0.0280756	0.00182317	0.030621	0.0507056	-0.0313438	0.030818	0.0176123
Drosha	M1	turquoise	0.00579651	0.0245679	0.0454156	-0.0299588	0.00704755	-0.0702375	-0.0163203
Arhgap24	M4	blue	-0.119572	-0.177372	-0.0917246	0.230695	0.00334016	0.0714006	0.0658897
Rilpl2	M2	yellow	-0.126269	-0.396875	-0.338725	0.350549	0.0785386	0.0910043	0.22768
Myadm	M4	blue	-0.240139	-0.365925	-0.190574	0.443075	0.159438	0.14858	0.182597
Smim13	grey	grey	-0.0560796	-0.132419	-0.0661153	0.181445	0.102226	0.0439121	0.0207458
Sash1	grey	grey	-0.049487	-0.0551418	0.00754695	0.0308995	0.0296882	0.126801	0.038701
A930007I19Rik	M1	turquoise	0.0149975	-0.0403318	-0.0538841	0.0256294	-0.00929204	0.0381799	0.00458109
Calhm2	M1	turquoise	0.114034	0.120816	0.108058	-0.00146522	0.0424066	0.138587	0.0570181
Ccl12	M6	brown	0.00578888	-0.0151378	0.027595	-0.0082547	0.078649	0.0112485	0.0473422
Lin54	M3	red	0.0496159	-0.0807382	-0.110248	0.0205274	-0.0109196	0.0674693	0.0808977
Siglece	M1	turquoise	-0.0103663	-0.106946	-0.0979683	0.107359	0.0756223	0.0305205	0.0668121
Cdc42ep2	M1	turquoise	0.185054	0.0495947	-0.0684111	-0.0602033	0.0397139	0.0670472	0.0707213
Cyth1	M3	red	-0.0908377	-0.27204	-0.271315	0.231697	0.129581	0.0254807	0.17987
Rnd1	M3	red	0.0510192	-0.0732061	-0.111238	0.024831	0.122646	0.138337	0.0886553
Asph	M3	red	-0.0330331	-0.156427	-0.181971	0.0751135	-0.0173211	0.0063177	0.125613
Ybx3	M2	yellow	-0.0731288	-0.188523	-0.118862	0.214417	0.110411	0.213951	0.170301
Pxk	M3	red	-0.00819631	-0.141252	-0.204196	0.109138	0.0781834	0.0516415	0.0900234
Plgrkt	M1	turquoise	0.121987	0.00836886	-0.0231208	0.0591435	0.123901	0.155639	0.0495977
Srek1	grey	grey	-0.0342878	-0.15432	-0.156312	0.119821	0.0692757	0.0793281	0.166901
Rbm34	M6	brown	0.0188213	-0.0315528	-0.0348199	0.0901548	0.0255165	0.115363	0.0760962
Tnfsf13	M4	blue	-0.129109	-0.141224	-0.030598	0.372202	0.048729	0.136886	0.116878
Cmc2	M4	blue	-0.120669	-0.17448	-0.0875975	0.234849	0.047172	-0.0186881	0.119354
Arhgef6	M4	blue	-0.113021	-0.161325	-0.0489391	0.237636	0.105678	0.101008	0.0693296
Uhrf2	M1	turquoise	0.0115669	-0.103738	-0.0454514	0.0982103	0.109804	0.0831972	0.12104
Lrrc58	M2	yellow	-0.0393636	-0.188696	-0.149842	0.144071	0.0617475	0.0290885	0.139527
Msl2	M3	red	-0.0704208	-0.232761	-0.241769	0.141424	0.0285102	-0.0670491	0.0899653
Top1	M2	yellow	-0.167186	-0.330323	-0.213313	0.349549	0.108816	0.12583	0.191686
Heatr5a	M6	brown	-0.0523161	-0.0728546	-0.000876775	0.122442	0.0225584	0.102765	0.141384
Isy1	M3	red	-0.0373181	-0.248114	-0.300577	0.147255	0.132793	0.143096	0.158925
Mid1ip1	M6	brown	-0.022612	-0.0282295	0.0208762	0.144028	0.0556321	0.111304	0.0490444
Pon3	M3	red	0.00999627	-0.0794811	-0.0770316	0.0624541	0.0205011	0.0814088	0.0548728
Lsmem1	M3	red	-0.073364	-0.203011	-0.210334	0.070841	-0.00911023	-0.0162127	0.146633
Amn1	M1	turquoise	0.0174132	-0.062966	-0.0956684	0.033174	0.0241815	0.00971011	0.0528439
Gch1	M3	red	0.0220843	-0.235083	-0.292226	0.151653	0.137036	0.083215	0.124599
Tnip1	M1	turquoise	0.114056	-0.0367151	-0.0657896	0.0307393	0.0238637	0.0487019	0.0665475
Mgat4a	M3	red	0.0362348	-0.059695	-0.105085	0.0184901	0.0609677	0.057402	0.0369939
Bag4	M1	turquoise	0.125612	0.0848787	0.044919	-0.0939296	0.0808089	0.00538781	-0.0449293
Nsdhl	M6	brown	-0.0245706	-0.0122313	-0.000383026	0.0335893	0.00728184	0.0826426	0.0696142
Dusp7	M1	turquoise	-0.00899985	-0.0239817	0.0119418	0.0387332	-0.0100438	-0.0239315	0.0433026
Gjb2	M1	turquoise	0.154773	0.0566451	-0.0536413	-0.0734923	-0.0133028	0.0163044	0.0152188
Chd3	M1	turquoise	0.0282925	-0.00529382	0.0203833	-0.0190917	0.13625	0.185193	0.102997
Dck	M4	blue	-0.068365	-0.173536	-0.104043	0.228403	0.125622	0.153152	0.141721
Rbks	M6	brown	-0.10604	-0.0793912	0.0239676	0.176452	0.0507128	0.0336084	0.0425426
Sema4a	M6	brown	-0.1193	-0.186197	-0.0965626	0.254359	0.145418	0.227649	0.196428
Nabp1	M1	turquoise	0.196314	0.0820316	-0.000791915	-0.075752	0.0608639	0.0882826	0.0763331
Hnrnpa1	M2	yellow	-0.144121	-0.298749	-0.170986	0.366908	0.234873	0.191458	0.288992
A530013C23Rik	M1	turquoise	0.0566907	-0.0287204	-0.0791272	-0.0145518	0.00900223	-0.0575598	0.00448673
Batf	M4	blue	-0.014494	-0.120552	-0.0790869	0.1289	0.0554403	0.119129	0.0652774
Gm50022	M4	blue	-0.135255	-0.206667	-0.0829231	0.418778	0.0504076	0.0710353	0.105599
Gpd2	M3	red	0.0540817	-0.131882	-0.188683	0.052038	0.164845	0.108496	0.122005
Ik	M2	yellow	-0.0826516	-0.268699	-0.212174	0.207775	0.127837	0.0764978	0.149233
Tnfaip1	M4	blue	-0.07865	-0.0983242	-0.0429465	0.145583	0.0742122	0.0711943	0.097794
Tspan13	M1	turquoise	0.0111004	-0.214079	-0.212053	0.223297	0.211761	0.22858	0.19683
Tmco3	M1	turquoise	0.0452361	-0.108297	-0.140037	0.0154089	0.0171578	0.0388222	0.0785317
Hist1h4i	M3	red	-0.0307508	-0.149178	-0.164237	0.0578607	0.0897493	0.0220151	0.0355744
Stx11	M1	turquoise	0.0210641	-0.142807	-0.134004	0.156714	0.0862949	0.114806	0.1422
Cd52	M4	blue	-0.261008	-0.474623	-0.156024	0.689666	0.297259	0.345823	0.352465
Gabpb1	M3	red	-0.0313649	-0.0865895	-0.0917532	0.0934124	0.0230437	0.00557287	0.0695403
Slc4a11	M2	yellow	-0.11711	-0.223544	-0.152034	0.165523	0.0378576	0.00513708	0.0389007
Lrrcc1	M5	green	-0.0278839	-0.016918	0.0324744	0.0657651	0.11816	0.123719	0.0553148
Abcd3	M4	blue	-0.0404522	-0.0689202	-0.0332014	0.0968767	0.0673738	0.117753	0.0401383
Gbp7	M6	brown	-0.0950457	-0.0673847	-0.0151693	0.153996	-0.0377802	0.0328657	-0.000940694
Ift172	M5	green	-0.00189507	-0.0271479	0.0163544	0.0637371	0.0266455	0.0711542	-0.0058552
Mbd4	M6	brown	0.0743976	0.0843557	0.0957565	-0.0254628	0.00438969	0.0613481	0.0388548
Sfxn1	M2	yellow	-0.01763	-0.0650565	0.0106536	0.0461019	0.0335095	0.102015	0.0644031
2410006H16Rik	M4	blue	-0.0664608	-0.360992	-0.225734	0.416207	0.207429	0.187634	0.239206
Mcm6	M1	turquoise	-0.00813244	-0.0247349	-0.0196434	-0.0267248	0.0193056	0.039508	0.0249935
Nsl1	M6	brown	-0.0104563	0.00591515	0.0335962	0.0279298	0.0155697	0.0484521	0.000122754
Gm15472	M1	turquoise	0.0610287	0.0219166	-9.82905e-05	-0.0347691	-0.0210402	-0.0333332	-0.0093897
Atpaf1	M6	brown	-0.0520156	-0.0811857	-0.0357008	0.0702069	0.0390425	0.0561115	0.0594303
Cped1	M4	blue	-0.0749265	-0.0786496	-0.00039743	0.133218	0.051156	0.00042073	0.0515905
Paox	M4	blue	-0.0567898	-0.0446027	0.0121477	0.107699	0.0841733	0.00982382	0.013675
Dhcr7	M2	yellow	-0.0348606	-0.0545243	-0.0319871	0.0296702	0.00750404	0.0628216	0.066624
2810001G20Rik	M1	turquoise	0.0691055	0.0447194	0.0149954	-0.0120324	-0.00139558	0.0133674	0.0433055
Entpd5	M5	green	-0.0715777	-0.029031	0.0035888	0.0838593	-0.00259813	0.0319064	0.0432138
Zmiz1os1	M5	green	-0.00447744	-0.0443463	-0.0704931	0.0365849	0.0443294	0.0407247	0.0797765
Pcdh17	M1	turquoise	0.0222943	-0.0327596	-0.06763	-0.0307704	-0.0298735	-0.061039	-0.0225544
Gm20712	M3	red	0.0311061	-0.0213562	-0.0579101	0.0324322	0.0237149	0.00105653	0.0278702
Phka1	M4	blue	-0.0491965	-0.0350417	0.0129401	0.0924861	0.0574178	0.0377851	0.0546103
Amot	M2	yellow	-0.00925183	-0.0154992	-0.0133385	0.0488603	0.00460902	0.0156796	0.0359932
Upf3a	M4	blue	-0.0377477	-0.15784	-0.112906	0.183889	0.0920866	0.133353	0.144258
Timp2	M4	blue	-0.144114	-0.182518	-0.081968	0.276765	0.145237	0.189807	0.135391
Hspa4l	grey	grey	0.0209548	-0.0933209	-0.0779069	0.0885681	0.147525	0.119812	0.126037
Tshz1	M2	yellow	-0.051193	-0.188488	-0.154399	0.139183	-0.0167041	0.0205117	0.0562008
Klhdc10	M2	yellow	-0.0561709	-0.132316	-0.100628	0.106357	0.113553	0.0832	0.0846939
Cstf3	grey	grey	-0.049367	-0.0814621	-0.0534399	0.103815	0.0871808	0.0623948	0.123991
Ammecr1	grey	grey	-0.0426557	-0.108718	-0.0295085	0.141442	-0.0476643	0.0418591	0.118756
Arhgap31	M6	brown	-0.0840646	-0.116944	-0.0853277	0.0825042	0.0471774	0.0511655	0.0329114
Gm47863	M1	turquoise	-0.0425211	-0.0864689	-0.0782701	0.0629862	-0.00287075	0.0443146	0.0870662
Abcb1b	M2	yellow	-0.115356	-0.217664	-0.143119	0.153179	0.111109	0.05217	0.137186
Mindy1	M2	yellow	-0.149406	-0.310683	-0.180267	0.216007	0.00136455	-0.036894	0.0363515
Snhg1	M2	yellow	-0.0462325	-0.199609	-0.163512	0.141683	0.131378	0.14964	0.146339
Hacd4	M4	blue	-0.225128	-0.265797	-0.0934291	0.435147	0.0491025	0.0845416	0.160761
Themis2	M1	turquoise	0.259257	0.0751443	-0.056404	-0.0840953	0.0877009	0.136754	0.0550909
Tnfsf15	M6	brown	-0.0321179	0.00055856	0.034342	0.0443623	0.0177615	0.0830605	-0.0125059
Gpr155	grey	grey	0.089876	0.0352394	-0.00350745	-0.0420187	0.0352808	0.0482979	0.145661
Dglucy	M6	brown	-0.0482739	-0.0507112	-0.000648497	0.0920272	0.0912206	0.084042	0.00333443
Kdm1b	grey	grey	0.0482143	-0.0457556	-0.0542025	0.0180272	0.0258185	0.0162669	0.0648548
Pogk	M1	turquoise	0.0564716	0.00944628	0.0256194	-0.00484987	0.00329609	0.0440894	-0.0333761
Tlr1	M6	brown	-0.00959214	0.0258459	0.0774331	0.0385022	0.0676402	0.0519274	0.0675554
Zfp932	M1	turquoise	0.0174276	-0.00110897	-0.0184861	0.010697	0.0490069	0.0634245	0.0621806
Cysltr1	M4	blue	-0.124491	-0.153168	-0.0466641	0.259215	-0.000326044	0.0676173	0.0593743
Rgs10	M4	blue	-0.203877	-0.250649	-0.0484897	0.423553	0.105026	0.182759	0.236606
Txn1	M4	blue	-0.0879293	-0.389498	-0.159539	0.527337	0.241537	0.207238	0.262353
Sp140	M4	blue	-0.0990318	-0.136077	-0.0591725	0.241189	0.0593727	0.0872936	0.120074
Ccdc59	M6	brown	-0.0421251	-0.0260387	0.0257653	0.101029	0.0266684	0.106093	0.100554
Slc26a2	M1	turquoise	0.0274519	-0.102936	-0.148984	0.0933817	0.0374804	0.0181465	0.0990395
Rbm3	M4	blue	-0.123186	-0.436089	-0.218879	0.56218	0.263249	0.243887	0.359504
S100a1	M4	blue	-0.176806	-0.212278	-0.0801912	0.326686	0.0686387	0.104832	0.0858448
Msr1	M4	blue	-0.252234	-0.277793	-0.120476	0.415548	0.0749853	0.0784219	0.0923218
Acp5	M1	turquoise	0.326869	0.152244	-0.00920416	-0.136375	0.0653691	0.0907384	0.0800472
Dgat2	M2	yellow	-0.0626286	-0.178762	-0.144544	0.174426	0.081	-0.00152043	0.122898
Mefv	M2	yellow	-0.213848	-0.329384	-0.243546	0.362415	0.152939	0.0925001	0.174921
Txndc5	M6	brown	-0.0725537	-0.0673209	0.00393768	0.197819	0.0615193	0.119496	0.115148
Emp3	M6	brown	0.0966136	-0.139787	-0.134198	0.300297	0.285877	0.290674	0.299453
Igsf8	M4	blue	-0.0863996	-0.147829	-0.0703396	0.158739	0.109741	0.131891	0.181498
Fpr1	M1	turquoise	0.0379506	-0.0368249	-0.0928455	0.036117	0.062553	0.0121557	0.00306668
Ier5l	M2	yellow	-0.0642917	-0.0921461	-0.00865135	0.097065	0.0814828	0.115399	0.0372689
Cbx7	M6	brown	-0.0305232	-0.0298567	-0.00582271	0.0551838	0.0504669	0.0511583	0.0456931
Cd300lf	M4	blue	-0.151422	-0.184059	-0.077294	0.241912	0.0164596	0.163741	0.142243
Nfkb2	M3	red	0.00959105	-0.202172	-0.239108	0.13026	0.0997321	0.129541	0.144295
Irak3	M1	turquoise	0.0737593	-0.021512	-0.042091	0.0594642	0.0639677	0.0751785	0.00717625
Arf6	M1	turquoise	0.0441938	-0.0786477	-0.0695628	0.0557497	0.0449284	0.121839	0.133412
Isoc1	M1	turquoise	0.0241608	-0.0870611	-0.0805577	0.142656	0.0597348	0.0996381	0.12298
D930016D06Rik	M1	turquoise	0.0240597	-0.0208513	-0.0273282	0.00940727	0.0753511	0.00429908	0.00495805
Dcakd	M1	turquoise	0.06715	0.0509074	0.0165658	-0.0342095	0.0382395	0.0886851	0.000987054
Ttc38	M6	brown	-0.0182507	-0.0240566	-0.0198562	0.0299591	0.0467493	0.0645243	-0.0321224
Kctd12b	M1	turquoise	0.0152377	0.0123089	0.00903887	-0.000132164	-0.0614194	-0.0251556	-0.0308187
Cd3eap	M6	brown	-0.014575	0.00101262	0.0366478	0.0711899	0.0437426	0.134531	0.0907948
AI987944	M6	brown	0.0334819	0.013138	0.0303684	0.0725385	0.045269	0.13953	0.112934
Dhx33	M3	red	0.000170109	-0.0286245	-0.0458356	0.00582263	0.0537898	0.0151789	0.0438586
Arl4d	M1	turquoise	0.0453408	0.0435008	0.0525461	0.0141616	0.0298596	0.0466339	0.029635
Ppp1cb	M1	turquoise	0.293626	0.0870329	-0.0611831	-0.0595999	0.145784	0.067152	0.110021
Aprt	M4	blue	-0.239725	-0.333267	-0.102613	0.548491	0.153781	0.118035	0.21732
Smim10l1	M6	brown	-0.00343612	-0.0604642	-0.031357	0.111486	0.108663	0.14051	0.119695
Asf1a	M3	red	0.0619826	-0.0617803	-0.0954616	0.0155009	-0.0027663	-0.0426924	-0.00528007
Usp2	M2	yellow	-0.112332	-0.201266	-0.153249	0.139226	-0.0390197	-0.0573114	0.0651816
Nucb2	M4	blue	-0.160756	-0.115696	0.00882375	0.263755	0.135821	0.130367	0.0858873
Pa2g4	M4	blue	-0.106974	-0.11409	-0.0519886	0.173732	0.130823	0.155785	0.0899477
Pttg1	M1	turquoise	0.0430911	-0.133559	-0.144563	0.116454	0.1238	0.108892	0.0818855
Ggh	M4	blue	-0.111274	-0.160564	-0.0901349	0.292418	0.0814116	0.129054	0.129573
Spns1	M1	turquoise	-0.0156131	-0.0226981	0.00225866	0.107538	0.0799986	0.0778733	0.111541
Ubfd1	M1	turquoise	-0.000692838	-0.0512812	-0.0405258	0.035744	0.142047	0.0768191	0.0801596
Guca1a	M4	blue	-0.0989369	-0.126654	-0.0359816	0.21586	0.0733519	0.0966391	0.0856459
Hist4h4	M1	turquoise	-0.0280307	-0.0555528	-0.0279633	0.0560535	0.0409154	0.054359	0.0832937
Nostrin	M4	blue	-0.0440716	-0.0968353	-0.0389044	0.0689479	0.0584076	0.044564	0.114758
Mitf	M5	green	-0.0371831	-0.0770443	-0.0740956	0.0724968	0.0904182	0.0739492	0.0237489
Cep57	M1	turquoise	0.0361045	-0.0138909	-0.0362031	0.0394275	-0.0154703	0.0223071	0.0849554
Bin1	M5	green	-0.0144127	-0.0484542	-0.0420854	0.0605035	0.0488359	0.0945	0.0919062
Mapk6	M3	red	-0.0821173	-0.205765	-0.251347	0.143271	0.0921575	0.073407	0.0817283
Ccdc186	M1	turquoise	0.0242474	-0.0835411	-0.0972124	0.0873528	0.117156	0.142839	0.110923
Rbpj	M1	turquoise	-0.0421364	-0.156757	-0.124015	0.0877958	0.0847291	0.0546586	0.165835
Nr1h3	M6	brown	0.101102	0.0657503	0.0283785	-0.0465976	0.119692	0.118539	0.0261846
Dctpp1	M6	brown	-0.0769089	-0.100435	-0.027484	0.11113	0.0842691	0.128269	0.141948
Bclaf3	M1	turquoise	0.025036	-0.0466712	-0.0791995	0.00585049	0.0617492	0.0905173	0.0767955
Mrpl52	M4	blue	-0.230325	-0.31464	-0.13883	0.441915	0.164526	0.197904	0.242977
Bard1	M1	turquoise	0.114898	0.0620913	-0.00669204	-0.070307	-0.00905092	-0.0677142	-0.0350891
Ccdc181	M1	turquoise	0.0702439	0.0330881	0.0207868	-0.0499014	-0.000260147	0.0552565	0.0490183
Enkur	M1	turquoise	-0.0478057	-0.0418104	-0.0168929	0.0428167	-0.0265635	-0.0301598	0.00305607
Zbtb26	M6	brown	-0.0314326	0.00183428	0.0303918	0.0201476	0.0641114	0.127656	0.0143103
Tmem67	grey	grey	-0.0774274	-0.112515	-0.0623427	0.124318	-0.0223546	-0.0800049	-0.0119856
Cdc20	grey	grey	-0.0222394	-0.0447905	-0.0362074	0.0587172	0.0233618	0.0506428	-0.019502
Ehd2	M1	turquoise	0.0481629	0.0270036	0.00282925	-0.0613946	-0.0365435	-0.03749	0.0148349
Trim30d	M2	yellow	-0.0765446	-0.144016	-0.0878118	0.108716	-0.0593741	-0.0106254	0.0631989
4732496C06Rik	M3	red	-0.0207177	-0.0594855	-0.0554905	0.0377233	-0.0254656	-0.0404011	-0.00590637
Dus2	M5	green	-0.0227179	-0.073454	-0.0489634	0.055501	0.0989971	0.119351	0.0421302
Mlkl	M4	blue	-0.0709665	-0.0883122	-0.0031778	0.14804	-0.0104602	-0.0257388	0.0100147
Wdr59	M2	yellow	-0.0277834	-0.0353601	-0.01417	0.0547567	0.0548951	0.0285213	0.0511755
Dgke	M6	brown	-0.0379815	-0.0141469	0.0251537	0.0426536	0.0907798	0.112912	0.0230833
Pole2	M4	blue	-0.0509021	-0.0258141	0.011462	0.0800442	0.0763848	0.0374896	0.00870285
Wdr25	M3	red	0.0232728	-0.0322214	-0.0683371	0.00910304	0.0606544	-0.00968148	0.0583124
Ube2e2	grey	grey	-0.0122105	-0.0575979	-0.0393459	0.045718	-0.0249794	-0.00206166	0.0447359
E230025N22Rik	M2	yellow	-0.070896	-0.147224	-0.0929275	0.0989592	0.039576	0.00979913	0.012958
2810408I11Rik	grey	grey	-0.0340534	-0.0515983	0.00629215	0.0452768	-0.00234334	-0.0255918	0.124424
A630035G10Rik	M1	turquoise	0.0037596	-0.00979014	0.00939779	0.0163763	-0.0659835	-0.00429353	-0.019736
Gm13479	M1	turquoise	0.0598307	0.0577906	0.0580864	-0.0461259	-0.0126033	0.0361202	0.024912
Upp2	M4	blue	-0.048048	-0.0492736	0.00506356	0.0753754	-0.0243691	0.0520794	0.0598631
2810002D19Rik	M2	yellow	-0.0188372	-0.046223	-0.0378994	0.0573311	-0.0136889	-0.0104572	-0.0424658
Ift80	grey	grey	-0.046527	-0.079139	-0.0178343	0.0880132	0.00913549	0.0359406	0.0436124
Gm17494	M1	turquoise	0.07928	0.0282982	-0.0688617	-0.0361176	0.045686	-0.0417376	-0.00227793
Alms1	M1	turquoise	-0.0267206	-0.0055803	0.00847343	0.0150502	-0.0920004	-0.0240569	0.0200238
Il27	M6	brown	0.0554533	0.0217573	-0.00102735	-0.0580885	-0.0148845	0.0338736	0.0637963
Zfp764	M1	turquoise	0.0386447	0.0289426	0.0241266	0.0145602	0.105563	0.0572845	0.0802604
Afg1l	M6	brown	-0.0260589	-0.038568	0.00833249	0.00990907	0.0810208	0.0394403	0.0458473
Pcbp3	M4	blue	-0.000749286	0.00972509	0.0240629	0.0270497	0.0246317	0.0636808	0.0200533
Zfp39	M6	brown	0.0188918	0.0348904	0.0382978	-0.0388671	-0.00973599	0.0445058	0.0401773
Mfsd6l	M2	yellow	-0.0532311	-0.101004	-0.0528738	0.0709909	-0.0226757	-0.0120552	0.0947706
Slc25a10	M1	turquoise	0.0420634	0.0301434	-0.0167272	-0.00184521	-0.00437632	0.0123474	0.0318604
Ahnak2	M2	yellow	0.00708661	-0.0504684	-0.0281847	0.0364103	0.0332408	-0.00600088	0.0258554
Slc39a14	M5	green	0.0137331	-0.100926	-0.0831308	0.0262892	0.0818938	0.101176	0.0421757
Gm41442	M4	blue	-0.018912	-0.0880248	-0.0663944	0.059491	0.0998549	0.0761924	0.0387895
Dnajc28	grey	grey	0.00463354	0.0266359	0.0437491	-0.0152036	0.0308556	0.0268193	-0.015095
Ift140	M2	yellow	-0.059385	-0.0998582	-0.0240382	0.0681344	-0.0159821	-0.0291092	0.0526267
Rttn	M4	blue	0.0025522	-0.0239149	0.0139831	0.0138548	0.0344642	0.0729207	0.0270331
Gm50431	M2	yellow	-0.082781	-0.118752	-0.0764018	0.0955263	0.0468514	-0.0106121	-0.0197596
Slc9a7	M2	yellow	0.0236473	-0.0498466	-0.0320409	0.0222442	-0.029094	0.0557094	0.0339661
Pde4b	M3	red	0.0232519	-0.372751	-0.497949	0.187697	0.11253	0.0681937	0.175941
Gtf3c6	M4	blue	-0.0359994	-0.0618658	0.00833823	0.10427	0.0503365	0.0941625	0.0454008
Tceal9	M6	brown	-0.00175569	0.017519	0.0310488	0.0906008	-0.00200452	0.0604632	0.0837374
Scpep1	M4	blue	-0.0839119	-0.204978	-0.144343	0.193048	0.0661148	0.0924709	0.190753
Dock10	M2	yellow	-0.137505	-0.295117	-0.18939	0.232331	0.181422	0.194924	0.176284
Cd302	M4	blue	-0.168211	-0.229623	-0.0738508	0.432443	0.111066	0.141093	0.208811
D930030I03Rik	M1	turquoise	0.0305196	-0.0616254	-0.0936317	-0.00653291	0.0849113	0.114992	0.061405
Mdfic	M2	yellow	0.00247823	-0.0959148	-0.0933059	0.0873908	0.0503229	0.0637492	0.023743
Hdlbp	M4	blue	-0.140477	-0.284417	-0.196451	0.349474	0.128226	0.13149	0.209249
Lilrb4a	M4	blue	-0.302761	-0.465689	-0.235768	0.501904	0.155823	0.228277	0.234326
Cd164	M2	yellow	-0.092153	-0.198775	-0.138127	0.173475	0.0420181	0.0820336	0.121115
Zdhhc3	M1	turquoise	0.0164737	-0.0823532	-0.130228	0.0737784	0.154454	0.0379163	0.101284
Glipr2	M4	blue	-0.172892	-0.282631	-0.139419	0.387711	0.141022	0.0612068	0.216522
Snx18	M3	red	-0.0554757	-0.35676	-0.390334	0.255709	0.0842256	-0.0531056	0.134537
Tmem51	M1	turquoise	0.357032	0.15202	-0.0311244	-0.145787	0.129877	0.0968069	0.0801932
Prkar2b	M4	blue	-0.133687	-0.169996	-0.0680583	0.232335	-0.0325654	0.00537413	0.087988
Lsr	M4	blue	-0.147927	-0.159736	-0.0314824	0.228301	0.0749814	0.0792776	0.144449
Pilra	M1	turquoise	0.326378	0.0642747	-0.0760702	-0.0920841	0.0778045	0.0457938	0.0880637
Jak2	M1	turquoise	0.0435036	-0.134683	-0.168442	0.0158674	0.0597379	0.108487	0.0895968
Selenbp1	M4	blue	-0.0697401	-0.119934	-0.0516201	0.217406	0.00829229	0.145727	0.126923
Cct6a	M4	blue	-0.0817941	-0.120423	-0.0351935	0.215439	0.101238	0.159275	0.124086
Ptprs	M6	brown	-0.00460926	-0.0693671	-0.0407035	0.029667	0.0548526	0.141587	0.0689716
Gbp3	M4	blue	-0.0777029	-0.0802727	-0.00819216	0.128103	0.0539559	0.103271	0.107136
Lacc1	M1	turquoise	0.0311172	0.0300819	0.0447049	0.00436744	0.116424	0.0427928	0.0572411
Rftn1	M5	green	-0.0487214	-0.109519	-0.0540924	0.177582	0.155429	0.146311	0.148631
Ehmt1	M6	brown	-0.0289004	-0.0576942	-0.0113995	0.111767	0.0709238	0.163641	0.0936823
Rif1	M1	turquoise	0.0499888	0.0419046	0.0220001	0.00263379	0.00806821	0.082465	0.0167464
Slx4ip	M6	brown	0.0565836	0.0193955	0.0387919	0.0171863	0.0832201	0.176084	0.0301358
Mier3	grey	grey	-0.00967456	-0.0367078	-0.0478136	0.0376391	0.0899855	0.0243051	0.0107915
Amz1	M3	red	-0.0644044	-0.162073	-0.1534	0.140295	0.0484289	0.0878287	0.128713
Chn2	M1	turquoise	0.0483474	-0.0500576	-0.085192	-0.0111814	0.0369321	0.0259327	0.0397439
Slc35d2	M6	brown	0.0434908	-0.00898817	-0.0149743	-0.0143865	0.021255	0.137804	0.0624745
Mir99ahg	M3	red	-0.0580151	-0.0794367	-0.041812	0.0634519	0.0106134	0.0379604	0.0380305
Psat1	M6	brown	0.000259713	0.00248376	0.000758024	0.0513141	0.0211023	0.085757	0.0601103
Pgam5	M5	green	-0.0178734	-0.0228113	-0.025389	0.0474037	-0.0448268	-0.00898221	-0.00711575
Rnf150	M6	brown	-0.0286801	-0.0602632	-0.0477465	0.00635666	0.0438738	0.0735074	0.0497646
Igbp1	M2	yellow	-0.122556	-0.238962	-0.153532	0.298695	0.15563	0.109089	0.165691
Cct3	grey	grey	-0.0049843	-0.088349	-0.0703066	0.114631	0.126828	0.132571	0.257387
Ranbp1	M1	turquoise	-0.0404061	-0.115288	-0.072303	0.18247	0.151028	0.138778	0.172817
Cd33	M4	blue	-0.181079	-0.306285	-0.187439	0.285082	0.0711009	0.0883558	0.153726
Mrpl28	M4	blue	-0.115496	-0.126634	-0.0152288	0.203975	0.163586	0.0791116	0.0905529
Fopnl	M6	brown	0.0549029	0.0272515	0.0212546	0.030974	0.00783087	0.108126	0.0520256
H60b	M6	brown	-0.0357584	-0.0486346	-0.0240099	0.0966931	0.128856	0.0994584	0.0260835
Sacs	M3	red	-0.00436654	-0.0677941	-0.110134	0.00793007	0.0628078	0.0405189	0.054246
Ptgfrn	M4	blue	-0.139025	-0.151092	-0.0113478	0.258323	0.0124745	0.0657242	0.0789559
Tspan3	M4	blue	-0.049456	-0.0991957	-0.0266641	0.0784509	0.0315295	0.0617326	0.0844621
Timm22	M1	turquoise	0.0481984	0.0253721	0.0402474	-0.00214399	0.0660659	0.100017	0.0397067
Ciao3	M6	brown	-0.038571	-0.0280347	0.0488787	0.121339	0.0559453	0.178496	0.0711902
Gas2l3	M4	blue	-0.0935991	-0.100941	-0.0199091	0.174414	0.0670657	0.0875044	0.0632765
Pgm2l1	grey	grey	-0.022179	-0.0500249	-0.0216203	0.124972	0.10804	0.0653556	0.102416
Mrpl14	M1	turquoise	0.180734	0.0376863	-2.16981e-05	0.076923	0.054492	0.0990099	0.128791
Snx21	M1	turquoise	-0.00651431	-0.0231882	-0.00581504	0.0565234	0.0298899	0.0120113	0.0387123
Tbcel	M6	brown	-0.0876601	-0.0613916	0.01921	0.157324	0.0810527	0.081889	0.0507934
Iscu	M1	turquoise	-0.00748339	-0.117865	-0.0785687	0.187997	0.0558367	0.0727483	0.114527
Fnbp1l	M4	blue	-0.00935558	-0.063015	-0.0279623	0.0236514	0.0410791	0.0488972	0.0573636
Med19	M6	brown	-0.0195258	-0.00922506	0.0137647	0.0805696	-0.00126312	0.146567	0.0292426
Fam98b	M6	brown	0.0196668	-0.0677491	-0.0277481	0.0299339	0.038415	0.099405	0.0344428
Atad3a	M6	brown	-0.0274265	-0.0117439	-0.0284237	0.0557349	0.0430424	0.0784661	0.067972
Pdlim7	M5	green	-0.0317904	-0.0639594	-0.0632113	0.0559745	0.135459	0.0819049	0.036638
Gcnt1	M4	blue	-0.068628	-0.175748	-0.144153	0.137238	0.0706988	0.108204	0.0629937
Cpeb2	M1	turquoise	0.00413123	-0.159649	-0.207926	0.0929233	0.0262187	0.033219	0.0636525
Ndel1	M3	red	-0.0829108	-0.427491	-0.444259	0.303309	0.138347	0.0289598	0.234053
Agl	M1	turquoise	0.111164	0.0271661	-0.0472367	-0.0419304	0.0127156	-0.00259106	-0.0144963
Synpo2	M6	brown	0.0107045	-0.0131107	-0.00357566	-0.0269817	-0.00627425	-0.00290793	0.0110968
Nr1d1	M2	yellow	0.0212036	-0.0216581	-0.0253413	-0.0156166	-0.00135593	0.00327864	0.000750657
Junb	M3	red	-0.0871689	-0.575012	-0.531118	0.467552	0.285619	0.174418	0.361945
Hnmt	grey	grey	-0.0579401	-0.0753751	0.00407908	0.128434	-0.0178008	0.0712442	0.11544
Tssc4	M6	brown	0.00904192	-0.0145203	0.0284498	0.0693121	0.0390484	0.0808714	0.0484092
Zfp729a	M6	brown	-0.0434531	0.00200058	0.0175822	0.0665555	-0.0168076	0.0247762	0.0604058
Trappc5	M6	brown	-0.133325	-0.0906827	0.0659336	0.221935	0.123513	0.225872	0.153128
Fzd7	M1	turquoise	0.0672145	0.0542031	0.012661	-0.0569808	-0.0958114	-0.0299115	-0.0156559
Ptgs2os2	M1	turquoise	0.0118381	-0.0672751	-0.0919433	0.0191282	0.0326399	0.0387082	0.0159481
Smim8	M3	red	0.00134897	-0.0348589	-0.0689695	0.037036	0.000453821	-0.0448394	0.0366339
Gm26756	M2	yellow	-0.013475	-0.154837	-0.1628	0.0622349	0.0795132	0.0565551	0.0793996
Rfc5	M2	yellow	0.0297823	-0.0148274	0.00363332	0.0150302	0.0334029	0.0674639	0.0612353
Irgc1	M3	red	-0.0561002	-0.0958371	-0.0903247	0.0884537	-0.00280931	-0.0344713	0.0415058
Megf8	M2	yellow	-0.0411212	-0.0762085	-0.0269197	0.0883733	0.0298214	0.0290582	0.0116047
Sult1a1	M4	blue	-0.0684728	-0.0257792	0.0469432	0.0830648	-0.00247259	0.0586001	0.0779567
Slfn4	M4	blue	-0.0326117	-0.0726625	-0.0486178	0.111961	0.0225347	0.0390274	0.0209786
Bloc1s5	M1	turquoise	0.0824193	0.0413207	-0.0116322	-0.0280769	0.0677378	0.0384437	0.0278228
Sfmbt1	M4	blue	-0.0371272	-0.119045	-0.100772	0.0549195	0.0362323	0.00823176	0.0337437
Cdpf1	grey	grey	-0.050172	-0.0634918	-0.0121441	0.0632327	0.0276584	0.0349519	0.0712708
Sp100	M4	blue	-0.164743	-0.164799	0.0182819	0.352473	0.0769159	0.194075	0.181798
Map3k14	M1	turquoise	0.291729	0.0658024	-0.160926	-0.163653	0.0199788	0.00429147	0.0795641
Ap1ar	M1	turquoise	-0.063368	-0.0752137	-0.00419966	0.0743328	0.0196422	0.0526675	0.00130045
Rplp0	M4	blue	-0.176515	-0.466426	-0.259013	0.623698	0.320732	0.29092	0.377579
Nsrp1	M6	brown	0.0420815	0.0374888	0.056743	0.0516092	0.0402853	0.0994357	0.0561524
Ywhah	M1	turquoise	0.0196558	-0.084072	-0.0564089	0.121848	0.195151	0.246257	0.223313
Nfic	M6	brown	-0.0441952	0.00917772	0.0915781	0.115924	0.0761711	0.209593	0.108175
Dedd2	M1	turquoise	0.156888	0.0529571	-0.0240693	-0.0474711	0.0347951	0.0140127	0.00906063
Arl13b	M2	yellow	-0.0297656	-0.217425	-0.215797	0.140868	0.101703	0.0363522	0.118664
Fbl	M4	blue	-0.131501	-0.204939	-0.108875	0.275336	0.14415	0.17168	0.169263
Pdxk	M1	turquoise	-0.0492258	-0.119596	-0.0830745	0.103595	0.106067	0.0914701	0.121027
Wdr43	M6	brown	-0.0729095	-0.076328	-0.0261126	0.0942966	0.0930047	0.1719	0.116389
Cd300c2	M1	turquoise	0.205555	0.0261294	-0.0589306	0.089301	0.0900957	0.189507	0.203791
Pcnx	M1	turquoise	0.150907	0.0150974	-0.0233342	-0.0552644	-0.00416901	0.0304586	0.0439409
Rabgef1	M2	yellow	-0.144555	-0.400284	-0.328892	0.233501	0.087275	0.0525829	0.134808
mt-Nd4	M6	brown	-0.100239	-0.351156	-0.14896	0.312301	0.267962	0.306094	0.281047
Atrn	M4	blue	-0.129738	-0.208758	-0.120286	0.183185	0.018626	0.00882246	0.0587627
Sirpb1b	M4	blue	-0.160775	-0.247557	-0.10274	0.37357	0.0659057	0.170095	0.206032
Wdfy2	M4	blue	-0.0760735	-0.124045	-0.0310759	0.139735	0.0302941	0.0159315	0.0973743
Specc1l	M2	yellow	-0.0694333	-0.276783	-0.240504	0.118337	0.114478	0.0361655	0.0847403
Lpgat1	M4	blue	-0.155809	-0.17889	-0.0740633	0.251345	0.0504416	0.111666	0.140425
Ypel2	M6	brown	0.0256224	-0.0656984	-0.0760525	0.0716589	0.0741504	0.0629404	0.118854
Atg16l1	M1	turquoise	0.00139296	-0.0368896	-0.0380439	0.0761571	-0.0390219	0.0768565	0.0374714
Xrcc4	M4	blue	-0.0702999	-0.048491	0.0170793	0.138409	-0.0243228	0.0698925	0.0915064
Hist1h1d	M2	yellow	-0.0336809	-0.104062	-0.0609185	0.0597871	0.0961524	0.111115	0.0373605
Eml3	grey	grey	0.0162531	-0.0364569	-0.0109932	0.0143728	0.0754976	0.0200828	0.037544
Oxr1	M1	turquoise	0.150244	0.0335681	-0.0542458	-0.0572095	0.050014	0.0429807	0.044992
Iqgap2	M4	blue	-0.172168	-0.218343	-0.108302	0.230061	0.125315	0.121105	0.119936
Sp3os	M4	blue	-0.0418827	-0.0976903	-0.0113965	0.132621	0.116406	0.101356	0.0980846
Dag1	M5	green	-0.0124925	-0.106322	-0.0844719	0.0991992	0.160194	0.0854363	0.122629
Klhl12	M1	turquoise	0.149735	0.088693	0.00448712	-0.0919555	-0.0116071	-0.0459888	-0.042107
Fyttd1	grey	grey	-0.0495072	-0.0760744	-0.0350935	0.118938	0.0562865	0.0533904	0.0764243
Slc43a2	M6	brown	-0.0416754	-0.0592384	0.0108167	0.17903	0.047262	0.161514	0.173851
Colec12	M1	turquoise	0.068169	-0.0138967	-0.025483	0.0680917	0.0339462	0.110722	0.00291819
Eif4e	M2	yellow	-0.112268	-0.275075	-0.212745	0.18828	0.133486	0.137757	0.121889
Met	M4	blue	-0.145623	-0.113406	0.0414955	0.212875	-0.0472135	0.0557985	0.0576412
Nudt16	M6	brown	-0.00161609	0.0439118	0.109176	0.0719773	0.0840549	0.167312	0.0699814
Gm17056	grey	grey	0.0197183	-0.117344	-0.128942	0.0331507	0.0594242	0.104248	0.208824
Kif16b	M5	green	0.0036651	-0.0857261	-0.0843128	0.0443927	0.133826	0.0931134	0.0356904
Gm16062	M1	turquoise	0.0719351	-0.0218307	-0.116668	-0.0104077	-0.0550492	-0.0190296	0.0379183
Vps39	M4	blue	-0.0854892	-0.0609469	0.0404703	0.147852	0.0203508	0.0655566	0.0427856
Smagp	M1	turquoise	0.342535	0.213568	0.0431282	-0.227199	-0.0305215	0.00239807	-0.0314933
Cd40	M1	turquoise	0.0510867	-0.0636653	-0.105889	0.0714506	0.0480892	0.127806	0.114447
Fbxo28	M1	turquoise	0.0210557	-0.0904393	-0.110341	0.0922499	0.0197164	-0.0416761	0.112121
Orai3	M1	turquoise	0.0400392	0.00474917	0.000855911	0.05732	1.29743e-05	0.0898509	0.0601408
Atp11a	M4	blue	-0.140771	-0.187806	-0.0872657	0.225894	-0.00762766	0.0432	0.0919389
Keap1	M4	blue	-0.0140175	0.0026879	0.0475512	0.0765487	0.112911	0.118664	0.0812958
Med29	M2	yellow	-0.0924822	-0.18708	-0.12157	0.171127	0.0367545	0.0562891	0.15995
Acbd5	M1	turquoise	0.0642098	-0.0406068	-0.0991201	0.0723597	0.0332196	0.134826	0.132861
Ing3	M4	blue	-0.082768	-0.137368	-0.065198	0.208895	0.0353523	0.0504269	0.147303
Pitpnc1	M1	turquoise	0.0527505	-0.00336984	-0.0195209	0.027447	0.0295251	0.0551766	0.00685312
Mphosph8	M1	turquoise	-5.71422e-05	-0.0294946	0.000549073	0.0425903	0.102803	0.0683955	0.0805558
Tubb5	grey	grey	-0.00165748	-0.133242	-0.0973551	0.138149	0.132549	0.180655	0.292982
Ifi214	M2	yellow	-0.0940009	-0.13045	-0.0710938	0.138832	0.0876268	0.0433443	0.0183202
Spred2	M1	turquoise	0.105822	0.00795542	-0.0403652	-0.0694555	0.0280306	0.0644753	0.0598925
Pdlim4	M4	blue	-0.0313617	-0.114149	-0.0658193	0.108597	0.0150047	0.0389802	0.104082
Rad9a	M6	brown	0.0252892	0.0589275	0.102058	-0.0130647	0.0282469	0.0663072	0.0151086
Ogfod1	M5	green	-0.0305054	-0.0596342	-0.013292	0.0732387	0.0529211	0.0108894	0.0408583
Pigm	M4	blue	-0.0531445	-0.0336872	0.0200105	0.0699105	-0.0195672	0.0491341	-0.0264106
Lrrc8a	M6	brown	-0.0154733	-0.0213366	-0.00324173	0.0238577	-0.00535767	0.0729228	0.0764095
Tfdp2	M1	turquoise	0.103844	0.0197013	-0.0259053	-0.0394755	0.0189934	0.0143674	0.0468416
Cdk14	M1	turquoise	0.282428	0.12443	0.0128123	-0.194132	0.050525	0.0476723	0.057582
Gm43445	M1	turquoise	0.050497	0.0627608	0.0343058	-0.052839	-0.067417	-0.0150549	0.00478624
Lig1	M1	turquoise	0.0624701	0.00862527	-0.0361023	-0.0217732	-0.00755301	0.0315327	0.00398186
Mthfd1l	M1	turquoise	0.0566352	-0.0326597	-0.0781454	-0.00579751	0.0550919	0.0162008	0.0537804
Pola2	M4	blue	0.02035	0.0535352	0.0875677	0.0216355	0.0561699	0.0168643	0.0213325
B3glct	M4	blue	-0.0673273	-0.0181042	0.0526947	0.133396	0.0276362	0.082327	0.0588032
Gm39121	M2	yellow	-0.115568	-0.19944	-0.159251	0.154559	0.0100812	-0.050644	0.0794243
Scnn1a	M1	turquoise	0.336766	0.236156	0.0594904	-0.226421	-0.0155237	-0.0779465	-0.0170462
Helz	M1	turquoise	0.0447949	-0.0705526	-0.064039	0.0191351	0.0424107	0.0168185	0.0726536
Pik3r1	M1	turquoise	0.0435766	-0.160174	-0.171057	0.106498	0.103135	0.100588	0.17669
Arhgap25	M1	turquoise	0.165152	-0.0259028	-0.117876	-0.0618956	0.126614	0.0699494	0.0668894
Ier2	M1	turquoise	0.0987235	-0.0415256	-0.111941	0.12435	0.135959	0.242655	0.113752
Zc3hav1l	M1	turquoise	0.0926151	-0.076577	-0.149916	-0.015042	0.06593	0.0289998	0.0497454
Wfdc18	M4	blue	-0.0785782	-0.0810118	0.0106475	0.165086	0.066588	0.0413006	0.0177151
Tsga10	M6	brown	0.0315883	0.0119243	0.0536088	0.00578974	0.0070157	0.0962149	0.0429675
Tiam1	M4	blue	-0.188517	-0.219562	-0.0950149	0.297869	0.0958627	0.0694418	0.179584
Pi16	M4	blue	-0.0482299	-0.19706	-0.130252	0.275926	0.11401	0.0819573	0.148326
Selenow	M6	brown	-0.0507719	-0.135939	-0.0846161	0.195732	0.202667	0.322317	0.1992
Frmd8	M1	turquoise	0.15451	0.101303	0.0275529	-0.089989	0.0494555	0.0415607	0.0343284
Dicer1	M6	brown	0.0421812	0.00754536	0.0203194	0.0266607	0.0179703	0.10117	0.037699
M6pr	M5	green	-0.0760394	-0.182981	-0.136187	0.220293	0.106929	0.0981756	0.160644
Neurl3	M1	turquoise	0.110099	-0.168607	-0.240958	0.0339095	0.127422	0.141739	0.182175
Mrps6	M6	brown	-0.0373413	-0.0549519	-0.0038119	0.0845918	0.113484	0.204747	0.0585453
Riok1	M6	brown	0.0320432	-0.0187293	-0.000512896	0.0381384	0.0213721	0.180815	0.0938269
Zbtb11	M1	turquoise	0.00139486	-0.0902788	-0.10196	0.0886782	0.0847049	0.0212557	0.113409
Usp14	M1	turquoise	0.00605993	-0.0120916	-0.0246092	0.0772709	0.0979419	0.152568	0.12899
Scarb1	M4	blue	-0.0328111	-0.107627	-0.0152299	0.233425	0.105709	0.12499	0.197241
Dbi	M4	blue	-0.223973	-0.368229	-0.141867	0.57576	0.198724	0.203281	0.257153
Tgs1	M1	turquoise	0.0216159	0.0104134	0.0664965	0.0603573	0.105232	0.142606	0.111057
Cflar	M5	green	-0.0514702	-0.185441	-0.156309	0.20412	0.13727	0.0688256	0.189295
Irak2	M3	red	-0.0401972	-0.228161	-0.237471	0.155766	0.0909962	0.0775932	0.0714445
Nme1	M4	blue	-0.206059	-0.209086	-0.0639144	0.428723	0.191312	0.153487	0.105552
Ahnak	M4	blue	-0.32388	-0.536985	-0.248278	0.651721	0.293112	0.178792	0.259363
Lactb	M1	turquoise	0.021076	-0.110468	-0.120945	0.128032	0.0725121	0.124315	0.162831
Ms4a6c	M4	blue	-0.17191	-0.369281	-0.118136	0.630796	0.166388	0.255757	0.269987
Ier5	M1	turquoise	0.163846	-0.24134	-0.197947	0.155567	0.0899098	0.151035	0.159533
Hivep3	M4	blue	-0.089253	-0.0677074	0.0104898	0.132501	0.050441	0.0557099	-0.0247665
Selenon	M2	yellow	0.026835	-0.157097	-0.161572	0.0686907	0.059031	0.0470438	0.083754
Mospd1	grey	grey	-0.0687742	-0.102272	-0.0420203	0.13633	0.0129275	-0.00361271	0.123511
Slc4a2	grey	grey	0.00855419	-0.0784715	-0.079257	0.0858408	0.0399858	0.0780857	0.0781585
Rai1	M6	brown	-0.0234675	-0.0661485	-0.0523631	0.0665873	0.050917	0.0627212	0.0777893
Tnfrsf12a	M1	turquoise	0.011672	-0.0839653	-0.161258	0.0181728	0.00622784	0.00696098	0.0938353
Pigq	M6	brown	0.0383587	-0.0388363	-0.0261983	0.0427486	0.0961426	0.0782477	0.0459754
Trip4	M1	turquoise	-0.0238761	-0.058651	-0.0400622	0.0941431	0.0424548	0.0516666	0.0977764
Zfp280d	M6	brown	0.0220773	0.00718235	0.0574329	0.0398088	0.122159	0.0820137	0.0670135
Crebl2	M1	turquoise	0.148568	0.04297	-0.0702872	-0.083746	0.0255897	-0.00109312	0.0796865
Cetn2	M4	blue	-0.0506449	-0.119833	-0.0753075	0.176117	0.0575403	0.110768	0.060322
Cep290	grey	grey	-0.0345428	-0.0711238	-0.0472545	0.0935441	0.0386355	0.0232437	0.157106
Gm36738	M4	blue	-0.0771325	-0.106041	-0.0401862	0.159333	0.0595965	-0.0110804	0.00924806
Fez2	M1	turquoise	0.0316826	0.00506301	0.0257431	0.050283	-0.0352882	-0.0117019	0.0300795
Stx16	M6	brown	0.0296096	0.00416335	0.0260592	0.0593754	0.00527683	0.15872	0.154406
Tcp11l2	M2	yellow	-0.107515	-0.266751	-0.231518	0.234112	0.134555	0.11821	0.190593
Ripor2	M1	turquoise	-0.0221383	-0.0639242	-0.013428	0.105426	0.0472682	0.122504	0.0907647
Acvrl1	M4	blue	-0.126043	-0.116459	-0.0195409	0.195263	0.108653	0.175541	0.131271
Degs1	M6	brown	0.0423063	-0.172049	-0.117509	0.289464	0.210371	0.109368	0.119812
Cwc25	M3	red	0.0165291	-0.139917	-0.200293	0.0660078	0.0666761	0.0825103	0.160579
Park7	grey	grey	-0.0628527	-0.180354	-0.0933194	0.215048	0.181057	0.192381	0.269138
Cd300lb	M6	brown	0.0728875	-0.00613408	0.00161629	0.0732511	0.0473805	0.0957148	0.0748289
Hmgcr	M6	brown	0.00932712	-0.0889813	-0.0793721	0.100175	0.148155	0.183165	0.0844264
Psme2	M4	blue	-0.0765167	-0.0752344	-0.0115686	0.297402	0.144946	0.210995	0.156573
Ctnna1	M6	brown	0.0027128	-0.103548	-0.0882392	0.143081	0.172434	0.127189	0.112985
Mcub	M4	blue	-0.160722	-0.16564	-0.0443718	0.339874	0.066519	0.128035	0.151551
Tubb2a	M3	red	-0.0389626	-0.131644	-0.154406	0.106602	0.01079	0.0541575	0.142063
Nectin4	grey	grey	-0.00185587	0.014141	0.0323518	0.0670654	-0.0160036	0.0552178	0.074495
4930589L23Rik	M2	yellow	-0.0426627	-0.0756099	-0.0165256	0.089741	0.00605665	0.0423923	-0.0130077
Col27a1	M2	yellow	-0.0244003	-0.130133	-0.0886776	0.0569235	0.0548728	0.0685192	0.0897125
Zmym1	M1	turquoise	0.0530045	0.0514102	0.037158	-0.0232328	-0.00877759	0.00619566	-0.00536739
Aasdh	M1	turquoise	-0.0273292	-0.0388108	-0.0272259	0.0348026	0.00987451	0.0429079	-0.00539231
Gcc1	grey	grey	-0.0407786	-0.0503472	-0.0193137	0.0682381	-0.0371619	-0.0122194	0.0338693
Trbc2	M5	green	0.0164604	0.00280777	0.0246911	0.0430767	0.0330242	0.0492066	-0.0155229
Tigar	M1	turquoise	0.0333753	-0.00249103	-0.0361628	0.000156219	-0.0368466	-0.0364403	-0.0495332
Sh3rf1	M1	turquoise	0.0404803	-0.0281194	-0.0282443	0.0141688	0.0303773	-0.0291587	0.0441494
Zfp961	grey	grey	0.00919989	-0.0221846	-0.0249733	0.0272872	-0.00450305	-0.0103137	0.114044
Gpld1	M4	blue	-0.0752785	-0.126581	-0.0910763	0.179098	0.0287378	-0.00753411	0.0847516
Rab2b	M1	turquoise	0.0768978	0.0336619	-0.0552877	-0.055391	0.0737148	-0.00946518	-0.0201306
Pla1a	M2	yellow	-0.0627726	-0.107137	-0.036339	0.0885325	-0.0496499	-0.0656154	-0.0156473
Btla	grey	grey	-0.0428224	-0.0694876	-0.0565732	0.0290959	0.101187	0.14528	0.0975883
Il18r1	M6	brown	0.0239554	-0.0172882	-0.0132985	-0.015268	-0.00511597	-0.00073133	-0.00131186
Ube2l6	M2	yellow	-0.0947836	-0.261011	-0.182987	0.263784	0.0176091	0.0309681	0.145524
Mrpl48	M6	brown	-0.0859717	-0.0970716	0.00204395	0.199542	0.105518	0.14747	0.140698
Pgp	M6	brown	-0.0585811	-0.0817955	0.00153144	0.203281	0.0854657	0.125699	0.0797373
Ezh2	grey	grey	-0.021309	-0.122779	-0.113866	0.0529127	0.0681903	0.030529	0.156753
Impa2	M4	blue	-0.0819468	-0.147114	-0.0778076	0.17848	0.0231751	0.0365234	0.0803147
Ppfia4	M6	brown	-0.131619	-0.117386	0.00396387	0.254078	0.162037	0.206369	0.172298
Gas7	M4	blue	-0.258359	-0.27417	-0.0807104	0.322523	0.0636728	0.0926602	0.109123
Sec61b	M4	blue	-0.244641	-0.50821	-0.210632	0.67601	0.306686	0.249496	0.34434
Peak1	M2	yellow	-0.125559	-0.239244	-0.144454	0.176292	0.0657286	0.0319288	0.060946
Lpin2	M5	green	-0.0623838	-0.164034	-0.104846	0.172929	0.0890656	0.110249	0.106711
Erich1	M1	turquoise	0.0492849	0.0293256	0.0352434	0.0607967	0.00846035	0.0436877	0.0624957
Srebf2	M5	green	0.0173807	-0.0836129	-0.0989417	0.0436771	0.144791	0.11843	0.0761256
Anxa4	M4	blue	-0.0853913	-0.190221	-0.12536	0.217303	0.123474	0.143282	0.159698
Stk35	M2	yellow	-0.0142713	-0.0177892	-0.0611225	0.0432975	0.0124015	-0.020281	0.0105211
Zfp180	M1	turquoise	0.0494394	-0.0309212	-0.0849009	0.0432922	0.09525	0.0280416	0.0877365
Pcyt2	grey	grey	-0.0428865	-0.0504768	-0.0511418	0.0560971	0.0224282	0.0358285	0.0917396
Irs2	M4	blue	-0.0651017	-0.135689	-0.0590898	0.172816	0.0931099	0.131049	0.130901
Cenpl	M1	turquoise	0.0512889	0.0512583	0.0322586	-0.00503724	0.0468237	0.107469	0.0319226
E2f1	M1	turquoise	-0.00617267	-0.046186	-0.0220358	0.0543953	0.0701819	0.0964692	0.0485731
Ric8b	M1	turquoise	0.0946935	0.0499164	-0.0253241	-0.0197514	-0.00790955	-0.0316277	0.0162244
Mtif2	M1	turquoise	0.0193302	-0.040411	-0.0633497	0.0405284	0.00153847	-0.0460105	0.0712264
Mmd	M2	yellow	-0.0301604	-0.115679	-0.103318	0.0816173	0.0046685	-0.0209386	0.0225817
Utp6	M6	brown	0.00470236	0.0491465	0.0848941	0.0421434	0.0749272	0.162618	0.0221395
Slc41a1	M1	turquoise	0.0472716	-0.0209995	-0.071909	0.0103207	0.0264246	0.00448606	0.0265412
Tomm70a	M6	brown	-0.0342093	-0.0861451	-0.0181421	0.12234	0.0779058	0.146069	0.0819584
Sipa1l1	M1	turquoise	0.188328	-0.00618036	-0.165462	-0.064905	-0.00217415	-0.00704369	0.00882036
1110038B12Rik	M4	blue	-0.0888184	-0.202314	-0.132238	0.229559	0.14116	0.17246	0.13525
Gnl3	M2	yellow	-0.0443549	-0.134041	-0.0451788	0.084202	0.0516954	0.0379728	0.098618
Tmem251	M1	turquoise	0.0214681	-0.105246	-0.137847	0.0648843	0.116158	0.101105	0.148405
Ubc	M1	turquoise	0.286622	-0.110279	-0.142479	0.0510437	0.267144	0.321468	0.272461
Dclre1c	M1	turquoise	0.0440715	-0.0932049	-0.122026	0.0566929	0.0114969	0.0639848	0.0821941
Vps13a	M1	turquoise	0.00197671	-0.0134585	0.0164372	0.0465794	0.032645	0.0789464	0.0380374
Pno1	M4	blue	-0.0793139	-0.0843101	-0.0202882	0.155487	0.128459	0.106999	0.116454
Dnmt3a	M1	turquoise	0.101065	0.01161	-0.0257685	-0.06534	0.141545	0.131596	0.0954288
Nsmce1	grey	grey	-0.048429	-0.0593247	-0.00587075	0.106743	0.105401	0.0756876	0.225098
Secisbp2l	M3	red	-0.0185313	-0.147854	-0.190806	0.127461	0.0673718	-0.00347977	0.0476228
C730034F03Rik	M6	brown	0.0354798	0.0210677	0.0272563	-0.00650357	0.0480239	0.0657716	0.0148013
Sfxn5	M4	blue	-0.0186512	-0.0895043	-0.0737611	0.0971993	0.0771383	0.0645516	0.0406929
Recql	M1	turquoise	0.076161	0.0185051	-0.00611069	-0.000753344	0.0406698	0.0317167	0.0654823
Abcd4	M6	brown	-0.0523135	-0.053054	-0.00901889	0.0784923	0.0445401	0.0571824	0.0118948
Socs5	M1	turquoise	0.0467538	-0.023275	-0.0779955	-0.00913482	0.0271384	0.0119099	0.0313104
Zfp830	M1	turquoise	0.0143389	-0.0592969	-0.0775867	0.0415867	0.0452159	0.00363301	0.00369987
Hccs	M6	brown	-0.0656036	-0.082393	-0.0380007	0.167212	0.0563587	0.113972	0.0914479
Pkib	M4	blue	-0.112444	-0.148441	-0.0453568	0.149286	0.0438991	0.0454027	0.0757499
Tle4	M1	turquoise	0.161705	0.0232804	-0.0967641	-0.0419176	0.0317763	0.0436669	0.0688156
Npc2	M4	blue	-0.374992	-0.519808	-0.209844	0.739362	0.240576	0.2196	0.324458
Cx3cr1	M1	turquoise	0.352613	0.1975	0.0240998	-0.147969	0.0267033	0.125865	0.110653
Ampd3	M6	brown	-0.0368919	-0.0557827	0.000867584	0.157083	-0.000499645	0.0336611	0.0431469
Emb	M4	blue	-0.175364	-0.45387	-0.212317	0.538158	0.163905	0.160904	0.166514
Klhl18	M1	turquoise	0.0292863	-0.0195109	0.00707535	0.0296149	0.02229	0.0765737	0.0111744
B4galt6	M4	blue	-0.0823968	-0.145559	-0.0427626	0.145499	0.0323419	0.0375317	0.115946
Arl3	M5	green	-0.0353842	-0.101359	-0.0611201	0.108477	0.196605	0.132713	0.106931
Gm12940	M1	turquoise	-0.023357	-0.0826995	-0.0893044	0.0373955	0.0974308	0.0124306	0.0317304
Nup54	M4	blue	-0.0413482	-0.0424488	-0.0252648	0.082111	0.00267834	0.0783054	0.0198556
Sema4d	M1	turquoise	0.29754	0.0968773	-0.0670642	-0.108021	0.082207	0.0983507	0.0735037
Prkar2a	M1	turquoise	0.0252626	-0.0353046	-0.0500054	0.0829828	0.0404905	0.0711859	0.124279
Pptc7	M1	turquoise	0.139501	-0.00685676	-0.108528	-0.0226416	-0.00866726	0.00892793	0.0296845
Btbd1	M2	yellow	-0.00414137	-0.146275	-0.108194	0.0686252	0.0869493	0.0661847	0.13404
Creb1	M1	turquoise	0.051273	-0.113051	-0.140784	0.0878527	0.0997532	0.0507338	0.175736
Arid4b	M1	turquoise	0.0540818	-0.160417	-0.181635	0.128373	0.15826	0.190735	0.165371
Suco	M3	red	0.0716568	-0.0834907	-0.160748	0.058701	0.0857282	0.0554307	0.13282
Rps18	M4	blue	-0.168409	-0.490415	-0.256938	0.63198	0.32963	0.311742	0.373144
Dram1	M4	blue	-0.0498951	-0.102799	-0.0341313	0.19368	0.0797904	0.0677535	0.11726
Pdia6	M1	turquoise	0.0120736	-0.0707709	-0.0796307	0.16582	0.141341	0.201429	0.189162
Bbc3	M1	turquoise	0.109755	0.0906521	0.0400794	-0.00481337	0.0884332	0.107212	0.118785
Scaper	M1	turquoise	-0.0202994	-0.0573703	-0.0289454	0.0624939	-0.0127215	0.0351831	0.0871424
Tsix	M2	yellow	-0.0861938	-0.182856	-0.127324	0.152217	0.0378658	0.076456	0.0772563
Pds5b	M6	brown	-0.07166	-0.0821986	-0.000325179	0.113944	0.0722328	0.124509	0.039711
Colgalt1	M6	brown	-0.103865	-0.0653955	0.0272769	0.191583	0.119643	0.169961	0.0802092
Nhsl2	grey	grey	-0.0652952	-0.121593	-0.0564736	0.197225	0.0438055	0.0471051	0.0662524
Snrnp27	grey	grey	-0.0548057	-0.0974697	-0.0640911	0.149817	0.111377	0.0799804	0.139031
Cldnd1	grey	grey	-0.0310119	-0.130262	-0.133792	0.181514	0.118819	0.10764	0.202155
Trerf1	M6	brown	-0.100399	-0.0963997	-0.0210179	0.0927474	0.116078	0.208141	0.0530003
Kif21b	M1	turquoise	0.167004	0.0701425	-0.0124807	-0.0770793	-7.93621e-05	0.0391976	0.0784136
Tubb6	M3	red	-0.0714847	-0.268199	-0.278683	0.220618	0.135037	0.0579322	0.12519
Asxl2	M1	turquoise	0.00481957	-0.0501883	-0.0177948	0.0702309	0.0314605	0.0636627	0.0418341
Nfat5	M3	red	0.143577	-0.131918	-0.295254	-0.0415559	0.077012	0.0326301	0.0744786
Trim30a	M4	blue	-0.164827	-0.217959	-0.0849134	0.35263	0.0427315	0.100193	0.157508
Glipr1	M4	blue	-0.078344	-0.183777	-0.0755272	0.27274	0.101488	0.135521	0.196141
