# Supplementary material for: Single-Cell Transcriptomic Profiles of Lung Pre-Metastatic Niche Reveal Neutrophil and Lymphatic Endothelial Cell Roles in Breast Cancer
Source: Cancers (Basel). 2022 Dec 28;15(1):176. doi: 10.3390/cancers15010176 (PMC9818165; doi:10.3390/cancers15010176)
Supplement: Supplementary file 1 [file cancers-15-00176-s001.zip › Table S4.xlsx]

## Sheet: M4_DAVID_KEGG
Category	Term	Count	%	PValue	-Log10(Pvalue)	Genes	List Total	Pop Hits	Pop Total	Fold Enrichment	Bonferroni	Benjamini	FDR
KEGG_PATHWAY	mmu01232:Nucleotide metabolism	7	2.02312	0.0031267	2.50491	GDA, IMPDH1, CTPS2, UPP2, DCK, NME1, APRT	155	84	8977	4.82634	0.531326	0.628247	0.628247
KEGG_PATHWAY	mmu04672:Intestinal immune network for IgA production	5	1.44509	0.00611323	2.21373	IL15, H2-DMA, H2-DMB1, TNFSF13, ITGB7	155	43	8977	6.73443	0.773258	0.628247	0.628247
KEGG_PATHWAY	mmu04621:NOD-like receptor signaling pathway	10	2.89017	0.0109852	1.95919	TXN1, PYCARD, GBP5, RNASEL, IFI204, OAS3, IRF7, TAB3, PLCB1, GBP3	155	213	8977	2.71907	0.930964	0.628247	0.628247
KEGG_PATHWAY	mmu04060:Cytokine-cytokine receptor interaction	12	3.46821	0.011677	1.93267	CCR1, CSF2RB2, ACVRL1, CCL9, CSF3R, CCL6, IL15, TNFSF13, OSM, IL4RA, CSF2RB, CCR2	155	292	8977	2.38011	0.941718	0.628247	0.628247
KEGG_PATHWAY	mmu04145:Phagosome	9	2.60116	0.0129803	1.88672	C3, MSR1, SCARB1, FCGR3, CTSL, H2-DMA, H2-DMB1, SEC61B, FCGR2B	155	182	8977	2.86398	0.95765	0.628247	0.628247
KEGG_PATHWAY	mmu04610:Complement and coagulation cascades	6	1.7341	0.0216354	1.66483	C3, CFH, F10, F13A1, CFB, F5	155	93	8977	3.73652	0.994975	0.685191	0.685191
KEGG_PATHWAY	mmu04640:Hematopoietic cell lineage	6	1.7341	0.0225449	1.64695	CSF3R, H2-DMA, H2-DMB1, ITGA1, IL4RA, CD33	155	94	8977	3.69677	0.995987	0.685191	0.685191
KEGG_PATHWAY	mmu05150:Staphylococcus aureus infection	7	2.02312	0.0226509	1.64491	C3, FCGR3, CFH, H2-DMA, H2-DMB1, FCGR2B, CFB	155	128	8977	3.16729	0.996091	0.685191	0.685191
KEGG_PATHWAY	mmu05171:Coronavirus disease - COVID-19	10	2.89017	0.0262105	1.58152	C3, RPS18, OAS3, RPL12, RPLP0, F13A1, RPS27L, RPS2, RPL10A, CFB	155	247	8977	2.34478	0.998384	0.704772	0.704772
KEGG_PATHWAY	mmu05132:Salmonella infection	10	2.89017	0.0299658	1.52337	TXN1, PYCARD, MAP2K4, ARF2, ANXA2, MLKL, AHNAK, TAB3, VPS39, S100A10	155	253	8977	2.28918	0.999365	0.725173	0.725173
KEGG_PATHWAY	mmu04979:Cholesterol metabolism	4	1.15607	0.0514154	1.28891	SCARB1, NPC2, APOC1, TSPO	155	49	8977	4.72785	0.999997	1	1
KEGG_PATHWAY	mmu05323:Rheumatoid arthritis	5	1.44509	0.0621592	1.20649	IL15, CTSL, H2-DMA, H2-DMB1, TNFSF13	155	87	8977	3.32851	1	1	1
KEGG_PATHWAY	mmu04612:Antigen processing and presentation	5	1.44509	0.0686602	1.1633	CTSL, H2-DMA, H2-DMB1, PSME2, IFI30	155	90	8977	3.21756	1	1	1
KEGG_PATHWAY	mmu04380:Osteoclast differentiation	6	1.7341	0.0689656	1.16137	SIRPB1B, FCGR3, PIRA2, TREM2, FCGR2B, LILRB4A	155	128	8977	2.71482	1	1	1
KEGG_PATHWAY	mmu00240:Pyrimidine metabolism	4	1.15607	0.0710353	1.14853	CTPS2, UPP2, DCK, NME1	155	56	8977	4.13687	1	1	1
KEGG_PATHWAY	mmu00983:Drug metabolism - other enzymes	5	1.44509	0.0731822	1.13559	IMPDH1, MGST3, MGST1, UPP2, NME1	155	92	8977	3.14762	1	1	1
KEGG_PATHWAY	mmu05164:Influenza A	7	2.02312	0.0770187	1.1134	PYCARD, RNASEL, OAS3, H2-DMA, H2-DMB1, IRF7, SLC25A4	155	173	8977	2.34343	1	1	1
KEGG_PATHWAY	mmu00230:Purine metabolism	6	1.7341	0.0803832	1.09483	GDA, IMPDH1, DCK, PAPSS2, NME1, APRT	155	134	8977	2.59326	1	1	1
KEGG_PATHWAY	mmu04142:Lysosome	6	1.7341	0.0823791	1.08418	NPC2, CTSL, CTSG, ARSG, CTSC, ARSB	155	135	8977	2.57405	1	1	1
KEGG_PATHWAY	mmu03010:Ribosome	7	2.02312	0.0873928	1.05852	RPS18, RPL12, RPLP0, MRPL28, RPS27L, RPS2, RPL10A	155	179	8977	2.26488	1	1	1
KEGG_PATHWAY	mmu05321:Inflammatory bowel disease	4	1.15607	0.0901281	1.04514	H2-DMA, H2-DMB1, IL4RA, RORA	155	62	8977	3.73652	1	1	1
