# Supplementary material for: Single-Cell Transcriptomic Profiles of Lung Pre-Metastatic Niche Reveal Neutrophil and Lymphatic Endothelial Cell Roles in Breast Cancer
Source: Cancers (Basel). 2022 Dec 28;15(1):176. doi: 10.3390/cancers15010176 (PMC9818165; doi:10.3390/cancers15010176)
Supplement: Supplementary file 1 [file cancers-15-00176-s001.zip › Table S5.xlsx]

## Sheet: M1_DAVID_KEGG
Category	Term	Count	%	PValue	-Log10(Pvalue)	Genes	List Total	Pop Hits	Pop Total	Fold Enrichment	Bonferroni	Benjamini	FDR
KEGG_PATHWAY	mmu05222:Small cell lung cancer	15	2.70758	3.43335e-07	6.46428	LAMB3, GADD45B, TRAF1, PIK3R1, NFKB1, CDK6, CCND1, COL4A2, COL4A1, CCNE1, CASP3, BCL2, E2F1, CKS2, ITGA6	258	93	8977	5.61203	9.7159e-05	9.01793e-05	7.80704e-05
KEGG_PATHWAY	mmu05200:Pathways in cancer	38	6.85921	6.37309e-07	6.19565	PTGER4, PDGFB, PIK3R1, LPAR4, RASGRP1, ETS1, IGF1R, BBC3, WNT6, MAPK8, CCND2, GNGT2, CCND1, CASP3, STAT4, E2F1, PMAIP1, HES1, PIM2, JAK2, STAT5A, ARHGEF11, JAG1, LAMB3, GADD45B, DAPK1, STAT1, FZD7, TRAF1, NFKB1, CDK6, COL4A2, COL4A1, CCNE1, BCL2, CKS2, ITGA6, IL7R	258	543	8977	2.43498	0.000180342	9.01793e-05	7.80704e-05
KEGG_PATHWAY	mmu05169:Epstein-Barr virus infection	22	3.97112	2.66608e-06	5.57413	CD40, GADD45B, STAT1, H2-Q6, H2-Q7, H2-Q4, PIK3R1, RBPJ, NFKB1, RELB, MAPK8, CDK6, CCND2, CCND1, CCNE1, CASP3, CD19, BCL2, E2F1, H2-OB, HES1, MAP3K14	258	231	8977	3.31377	0.000754218	0.0002515	0.00021773
KEGG_PATHWAY	mmu05165:Human papillomavirus infection	27	4.87365	1.35185e-05	4.86907	PTGER4, PATJ, H2-Q6, H2-Q7, H2-Q4, PIK3R1, RBPJ, WNT6, CCND2, CCND1, CASP3, E2F1, HES1, JAG1, LAMB3, VWF, STAT1, FZD7, NFKB1, CDK6, CREB1, COL4A2, COL4A1, CCNE1, IRF1, ITGA6, TLR3	258	362	8977	2.59518	0.00381846	0.000956435	0.000828009
KEGG_PATHWAY	mmu05166:Human T-cell leukemia virus 1 infection	21	3.79061	3.09092e-05	4.50991	STAT5A, RANBP1, CD40, H2-Q6, H2-Q7, H2-Q4, PIK3R1, ETS1, NFKB1, RELB, FOSL1, ZFP36, MAPK8, CREB1, CCND2, CCND1, PTTG1, CCNE1, E2F1, H2-OB, MAP3K14	258	250	8977	2.92274	0.00870928	0.00164463	0.0014238
KEGG_PATHWAY	mmu04115:p53 signaling pathway	11	1.98556	3.48685e-05	4.45757	RRM2, CDK6, CCND2, GADD45B, CD82, CCND1, CCNE1, CASP3, BCL2, PMAIP1, BBC3	258	72	8977	5.31584	0.00981944	0.00164463	0.0014238
KEGG_PATHWAY	mmu04917:Prolactin signaling pathway	11	1.98556	4.4426e-05	4.35236	STAT5A, SOCS2, MAPK8, CCND2, CCND1, STAT1, IRF1, PIK3R1, JAK2, NFKB1, SOCS5	258	74	8977	5.17217	0.0124941	0.00179608	0.00155491
KEGG_PATHWAY	mmu04218:Cellular senescence	17	3.06859	7.28533e-05	4.13755	GADD45B, H2-Q6, H2-Q7, H2-Q4, PIK3R1, LIN9, ETS1, NFKB1, ZFP36L1, PPP1CB, CDK6, CCND2, CCND1, CCNE1, E2F1, RAD9B, SQSTM1	258	184	8977	3.21472	0.0204071	0.00231253	0.00200202
KEGG_PATHWAY	mmu05167:Kaposi sarcoma-associated herpesvirus infection	19	3.4296	7.35435e-05	4.13346	STAT1, H2-Q6, H2-Q7, H2-Q4, PDGFB, PIK3R1, NFKB1, RCAN1, ZFP36, MAPK8, CREB1, GNGT2, CDK6, CCND1, CASP3, UBC, E2F1, JAK2, TLR3	258	224	8977	2.95133	0.0205985	0.00231253	0.00200202
KEGG_PATHWAY	mmu04662:B cell receptor signaling pathway	11	1.98556	9.74334e-05	4.01129	CD79B, CD79A, CD72, CD81, CD19, DAPP1, PIK3R1, NFKB1, MALT1, CD22, LILRA5	258	81	8977	4.72519	0.0271983	0.00275737	0.00238712
KEGG_PATHWAY	mmu04210:Apoptosis	14	2.52708	0.000134752	3.87047	GADD45B, TRAF1, PIK3R1, NFKB1, BBC3, MAPK8, TUBA1A, CASP3, BCL2, PMAIP1, BCL2A1D, BCL2A1A, MAP3K14, BCL2A1B	258	136	8977	3.58179	0.0374193	0.00328061	0.0028401
KEGG_PATHWAY	mmu04933:AGE-RAGE signaling pathway in diabetic complications	12	2.16606	0.000139107	3.85665	STAT5A, THBD, MAPK8, CCND1, COL4A2, COL4A1, STAT1, CASP3, BCL2, PIK3R1, JAK2, NFKB1	258	101	8977	4.13401	0.0386051	0.00328061	0.0028401
KEGG_PATHWAY	mmu05202:Transcriptional misregulation in cancer	18	3.2491	0.000233049	3.63255	MEF2C, CD40, FLT1, GADD45B, HPGD, TRAF1, NFKB1, IGF1R, ZEB1, CCND2, BCL6, NFKBIZ, REL, BCL2A1D, NUPR1, BCL2A1A, BCL2A1B, CDK14	258	224	8977	2.79599	0.0638323	0.00494157	0.00427804
KEGG_PATHWAY	mmu04151:PI3K-Akt signaling pathway	24	4.33213	0.000244459	3.61179	FLT1, VWF, LAMB3, PDGFB, PIK3R1, LPAR4, NFKB1, IGF1R, CREB1, GNGT2, CDK6, CCND2, CCND1, COL4A2, COL4A1, CCNE1, CD19, DDIT4, BCL2, ITGA6, JAK2, IL7R, SGK1, YWHAH	258	359	8977	2.3261	0.066851	0.00494157	0.00427804
KEGG_PATHWAY	mmu04380:Osteoclast differentiation	13	2.34657	0.000291914	3.53475	STAT1, PIK3R1, NFKB1, LILRA5, RELB, FOSL1, MAPK8, CREB1, FCGR4, ACP5, FYN, MAP3K14, SQSTM1	258	128	8977	3.53382	0.0793025	0.00532411	0.00460921
KEGG_PATHWAY	mmu05203:Viral carcinogenesis	18	3.2491	0.00030101	3.52142	STAT5A, RANBP1, H2-Q6, H2-Q7, H2-Q4, TRAF1, PIK3R1, RBPJ, NFKB1, CREB1, CDK6, CCND2, CCND1, CCNE1, CASP3, REL, PMAIP1, YWHAH	258	229	8977	2.73494	0.08167	0.00532411	0.00460921
KEGG_PATHWAY	mmu04640:Hematopoietic cell lineage	11	1.98556	0.00033856	3.47036	TFRC, CD19, H2-OB, CD38, CD9, ITGA6, CD37, CD36, IL7R, CD34, CD22	258	94	8977	4.07171	0.0913804	0.00563603	0.00487925
KEGG_PATHWAY	mmu04068:FoxO signaling pathway	13	2.34657	0.000361833	3.44149	PLK3, GABARAPL1, GADD45B, PLK2, PIK3R1, KLF2, IGF1R, MAPK8, CCND2, BCL6, CCND1, IL7R, SGK1	258	131	8977	3.4529	0.0973471	0.00568882	0.00492495
KEGG_PATHWAY	mmu04510:Focal adhesion	16	2.88809	0.0006423	3.19226	FLT1, VWF, LAMB3, PDGFB, PIK3R1, ARHGAP5, IGF1R, PPP1CB, MAPK8, CCND2, CCND1, COL4A2, COL4A1, BCL2, ITGA6, FYN	258	201	8977	2.76972	0.166256	0.00956688	0.00828228
KEGG_PATHWAY	mmu04064:NF-kappa B signaling pathway	11	1.98556	0.000820501	3.08592	CD40, GADD45B, BCL2, TRAF1, BCL2A1D, BCL2A1A, MAP3K14, BCL2A1B, NFKB1, MALT1, RELB	258	105	8977	3.64515	0.207289	0.0116101	0.0100511
KEGG_PATHWAY	mmu04110:Cell cycle	12	2.16606	0.00088721	3.05197	CDKN1C, CDK6, CCND2, DBF4, GADD45B, TFDP2, CCND1, PTTG1, CCNE1, E2F1, MCM6, YWHAH	258	125	8977	3.34028	0.222127	0.0119562	0.0103508
KEGG_PATHWAY	mmu05162:Measles	13	2.34657	0.000961233	3.01717	STAT5A, STAT1, CBLB, PIK3R1, NFKB1, BBC3, MAPK8, CDK6, CCND2, CCND1, CCNE1, CASP3, BCL2	258	146	8977	3.09815	0.238268	0.012365	0.0107046
KEGG_PATHWAY	mmu04668:TNF signaling pathway	11	1.98556	0.00144635	2.83973	MAPK8, BAG4, CREB1, JAG1, IRF1, CASP3, MAP3K8, PIK3R1, TRAF1, MAP3K14, NFKB1	258	113	8977	3.38708	0.336094	0.0177965	0.0154068
KEGG_PATHWAY	mmu05215:Prostate cancer	10	1.80505	0.00205674	2.68682	CREB1, ZEB1, CCND1, CCNE1, E2F1, BCL2, PDGFB, PIK3R1, NFKB1, IGF1R	258	99	8977	3.5146	0.441588	0.0242524	0.0209959
KEGG_PATHWAY	mmu05161:Hepatitis B	13	2.34657	0.0024687	2.60753	STAT5A, STAT1, PIK3R1, NFKB1, MAPK8, CREB1, CCNE1, CASP3, BCL2, STAT4, E2F1, JAK2, TLR3	258	163	8977	2.77503	0.503169	0.0279457	0.0241932
KEGG_PATHWAY	mmu04660:T cell receptor signaling pathway	10	1.80505	0.00270138	2.56841	MAPK8, NCK2, FYN, CBLB, MAP3K8, PIK3R1, MAP3K14, RASGRP1, NFKB1, MALT1	258	103	8977	3.37811	0.53491	0.0294035	0.0254553
KEGG_PATHWAY	mmu04658:Th1 and Th2 cell differentiation	9	1.62455	0.00360429	2.44318	STAT5A, MAPK8, JAG1, STAT1, STAT4, H2-OB, RBPJ, JAK2, NFKB1	258	88	8977	3.55854	0.640074	0.0377783	0.0327056
KEGG_PATHWAY	mmu05221:Acute myeloid leukemia	8	1.44404	0.00374337	2.42674	STAT5A, CCND1, PIK3R1, PIM2, BCL2A1D, BCL2A1A, BCL2A1B, NFKB1	258	70	8977	3.97652	0.654015	0.0378348	0.0327545
KEGG_PATHWAY	mmu05145:Toxoplasmosis	10	1.80505	0.00420547	2.37619	CD40, MAPK8, LAMB3, STAT1, CASP3, H2-OB, BCL2, ITGA6, JAK2, NFKB1	258	110	8977	3.16314	0.696586	0.0410396	0.035529
KEGG_PATHWAY	mmu04625:C-type lectin receptor signaling pathway	10	1.80505	0.00473724	2.32447	PLK3, MAPK8, STAT1, IRF1, CBLB, PIK3R1, MAP3K14, NFKB1, MALT1, RELB	258	112	8977	3.10666	0.739154	0.044688	0.0386875
KEGG_PATHWAY	mmu05212:Pancreatic cancer	8	1.44404	0.00590797	2.22856	MAPK8, CDK6, GADD45B, CCND1, STAT1, E2F1, PIK3R1, NFKB1	258	76	8977	3.66259	0.81305	0.0539341	0.046692
KEGG_PATHWAY	mmu04630:JAK-STAT signaling pathway	12	2.16606	0.00881004	2.05502	STAT5A, SOCS2, CCND2, CCND1, STAT1, STAT4, BCL2, PDGFB, PIK3R1, JAK2, IL7R, SOCS5	258	168	8977	2.48533	0.918266	0.0779138	0.0674519
KEGG_PATHWAY	mmu04514:Cell adhesion molecules	12	2.16606	0.0112965	1.94706	SPN, CD274, CD40, H2-Q6, H2-Q7, PECAM1, H2-Q4, H2-OB, ITGA6, L1CAM, CD34, CD22	258	174	8977	2.39963	0.959848	0.0968757	0.0838677
KEGG_PATHWAY	mmu04215:Apoptosis - multiple species	5	0.902527	0.012565	1.90084	MAPK8, CASP3, BCL2, PMAIP1, BBC3	258	32	8977	5.43665	0.97208	0.0983962	0.085184
KEGG_PATHWAY	mmu04979:Cholesterol metabolism	6	1.08303	0.0126345	1.89844	MYLIP, APOC2, LPL, APOE, CD36, PLTP	258	49	8977	4.26056	0.972631	0.0983962	0.085184
KEGG_PATHWAY	mmu05416:Viral myocarditis	8	1.44404	0.0128645	1.89061	CD40, CCND1, H2-Q6, CASP3, H2-Q7, H2-Q4, H2-OB, FYN	258	88	8977	3.16314	0.974377	0.0983962	0.085184
KEGG_PATHWAY	mmu05210:Colorectal cancer	8	1.44404	0.0128645	1.89061	MAPK8, GADD45B, CCND1, CASP3, BCL2, PMAIP1, PIK3R1, BBC3	258	88	8977	3.16314	0.974377	0.0983962	0.085184
KEGG_PATHWAY	mmu03320:PPAR signaling pathway	8	1.44404	0.0136328	1.86541	FABP4, GK, UBC, SCD2, LPL, SCD1, CD36, PLTP	258	89	8977	3.1276	0.979444	0.101528	0.0878957
KEGG_PATHWAY	mmu05152:Tuberculosis	12	2.16606	0.014288	1.84503	PLK3, MAPK8, CREB1, FCGR4, STAT1, CASP3, H2-OB, ITGAX, BCL2, JAK2, NFKB1, MALT1	258	180	8977	2.31964	0.982968	0.10368	0.0897582
KEGG_PATHWAY	mmu05218:Melanoma	7	1.26354	0.0167824	1.77515	CDK6, GADD45B, CCND1, E2F1, PDGFB, PIK3R1, IGF1R	258	72	8977	3.38281	0.991685	0.118735	0.102792
KEGG_PATHWAY	mmu05340:Primary immunodeficiency	5	0.902527	0.0188356	1.72502	CD79A, CD40, DCLRE1C, CD19, IL7R	258	36	8977	4.83258	0.995398	0.127937	0.110758
KEGG_PATHWAY	mmu05214:Glioma	7	1.26354	0.0189871	1.72154	CDK6, GADD45B, CCND1, E2F1, PDGFB, PIK3R1, IGF1R	258	74	8977	3.29138	0.995595	0.127937	0.110758
KEGG_PATHWAY	mmu05220:Chronic myeloid leukemia	7	1.26354	0.0213821	1.66995	STAT5A, CDK6, GADD45B, CCND1, E2F1, PIK3R1, NFKB1	258	76	8977	3.20476	0.997794	0.139538	0.120802
KEGG_PATHWAY	mmu04010:MAPK signaling pathway	16	2.88809	0.021695	1.66364	DUSP5, DUSP2, MEF2C, FLT1, GADD45B, PDGFB, RASGRP1, DUSP16, NFKB1, IGF1R, DUSP7, RELB, MAPK8, CASP3, MAP3K8, MAP3K14	258	294	8977	1.89358	0.997985	0.139538	0.120802
KEGG_PATHWAY	mmu05224:Breast cancer	10	1.80505	0.025185	1.59886	WNT6, JAG1, CDK6, GADD45B, CCND1, FZD7, E2F1, HES1, PIK3R1, IGF1R	258	147	8977	2.36698	0.999267	0.158386	0.137118
KEGG_PATHWAY	mmu05418:Fluid shear stress and atherosclerosis	10	1.80505	0.0261714	1.58217	THBD, MAPK8, MEF2C, PECAM1, BCL2, PDGFB, PIK3R1, SQSTM1, NFKB1, KLF2	258	148	8977	2.35098	0.99945	0.161011	0.139391
KEGG_PATHWAY	mmu05163:Human cytomegalovirus infection	14	2.52708	0.0322575	1.49137	PTGER4, ARHGEF11, H2-Q6, H2-Q7, H2-Q4, PIK3R1, NFKB1, CREB1, GNGT2, CDK6, CCND1, CASP3, CXCR2, E2F1	258	256	8977	1.90283	0.999907	0.194231	0.168151
KEGG_PATHWAY	mmu04145:Phagosome	11	1.98556	0.0362014	1.44127	COLEC12, TUBA1A, TFRC, FCGR4, TUBB3, H2-Q6, H2-Q7, H2-Q4, H2-OB, CD36, TUBB4B	258	182	8977	2.10297	0.999971	0.209689	0.181533
KEGG_PATHWAY	mmu04390:Hippo signaling pathway	10	1.80505	0.0363066	1.44001	PPP1CB, WNT6, PATJ, CCND2, CCND1, FZD7, ID1, BBC3, YWHAH, SMAD7	258	157	8977	2.21621	0.999972	0.209689	0.181533
KEGG_PATHWAY	mmu04137:Mitophagy - animal	6	1.08303	0.0447795	1.34892	PRKN, MAPK8, GABARAPL1, UBC, E2F1, SQSTM1	258	68	8977	3.07011	0.999998	0.253452	0.219419
KEGG_PATHWAY	mmu05160:Hepatitis C	10	1.80505	0.047338	1.32479	CDK6, CCND1, CD81, STAT1, CASP3, E2F1, PIK3R1, NFKB1, TLR3, YWHAH	258	165	8977	2.10876	0.999999	0.262679	0.227408
KEGG_PATHWAY	mmu04144:Endocytosis	14	2.52708	0.0487014	1.31246	TFRC, H2-Q6, H2-Q7, H2-Q4, ARAP2, ARAP3, CBLB, VPS37B, IGF2R, IGF1R, CYTH3, EHD2, CXCR2, ARF6	258	272	8977	1.7909	0.999999	0.265048	0.229458
KEGG_PATHWAY	mmu01522:Endocrine resistance	7	1.26354	0.0501979	1.29931	MAPK8, JAG1, CCND1, E2F1, BCL2, PIK3R1, IGF1R	258	93	8977	2.61895	1	0.267442	0.231531
KEGG_PATHWAY	mmu04140:Autophagy - animal	9	1.62455	0.0510313	1.29216	MAPK8, GABARAPL1, ATG16L1, DAPK1, DDIT4, BCL2, PIK3R1, SQSTM1, IGF1R	258	142	8977	2.20529	1	0.267442	0.231531
KEGG_PATHWAY	mmu05206:MicroRNAs in cancer	15	2.70758	0.0530914	1.27498	DNMT3A, PDGFB, KIF23, PIK3R1, NFKB1, MARCKS, ZEB1, CDK6, CCND2, CCND1, CCNE1, CASP3, DDIT4, BCL2, E2F1	258	303	8977	1.7225	1	0.273179	0.236498
KEGG_PATHWAY	mmu05223:Non-small cell lung cancer	6	1.08303	0.0549132	1.26032	STAT5A, CDK6, GADD45B, CCND1, E2F1, PIK3R1	258	72	8977	2.89955	1	0.277508	0.240245
KEGG_PATHWAY	mmu04620:Toll-like receptor signaling pathway	7	1.26354	0.0667969	1.17524	CD40, MAPK8, STAT1, MAP3K8, PIK3R1, NFKB1, TLR3	258	100	8977	2.43562	1	0.327023	0.283112
KEGG_PATHWAY	mmu00604:Glycosphingolipid biosynthesis - ganglio series	3	0.541516	0.0671011	1.17327	ST8SIA1, HEXB, ST3GAL5	258	15	8977	6.95891	1	0.327023	0.283112
KEGG_PATHWAY	mmu00270:Cysteine and methionine metabolism	5	0.902527	0.0681779	1.16636	LACC1, IL4I1, GCLC, DNMT3A, MAT2B	258	54	8977	3.22172	1	0.327023	0.283112
KEGG_PATHWAY	mmu04014:Ras signaling pathway	12	2.16606	0.0695598	1.15764	MAPK8, GNGT2, FLT1, REL, PDGFB, PIK3R1, RAPGEF5, RASGRP1, ETS1, NFKB1, IGF1R, ARF6	258	232	8977	1.79972	1	0.32809	0.284036
KEGG_PATHWAY	mmu00603:Glycosphingolipid biosynthesis - globo and isoglobo series	3	0.541516	0.0752795	1.12332	ST8SIA1, HEXB, NAGA	258	16	8977	6.52398	1	0.349248	0.302352
KEGG_PATHWAY	mmu04659:Th17 cell differentiation	7	1.26354	0.0803974	1.09476	STAT5A, MAPK8, IRF4, STAT1, H2-OB, JAK2, NFKB1	258	105	8977	2.31964	1	0.366975	0.3177
KEGG_PATHWAY	mmu05146:Amoebiasis	7	1.26354	0.0862417	1.06428	COL4A2, LAMB3, SERPINB6A, COL4A1, CASP3, PIK3R1, NFKB1	258	107	8977	2.27628	1	0.387403	0.335384
KEGG_PATHWAY	mmu04142:Lysosome	8	1.44404	0.0924802	1.03395	AP3M2, LAPTM4B, HYAL1, HEXB, NAGA, ACP5, NCOA7, IGF2R	258	135	8977	2.0619	1	0.408936	0.354026
KEGG_PATHWAY	mmu04931:Insulin resistance	7	1.26354	0.0954352	1.02029	PPP1CB, MAPK8, CREB1, GFPT1, PIK3R1, CD36, NFKB1	258	110	8977	2.2142	1	0.41551	0.359717
