# Supplementary material for: Single-Cell Transcriptomic Profiles of Lung Pre-Metastatic Niche Reveal Neutrophil and Lymphatic Endothelial Cell Roles in Breast Cancer
Source: Cancers (Basel). 2022 Dec 28;15(1):176. doi: 10.3390/cancers15010176 (PMC9818165; doi:10.3390/cancers15010176)
Supplement: Supplementary file 1 [file cancers-15-00176-s001.zip › Table S6.csv]

status	family	pval	qval	Gene	use_for_ordering
OK	negbinomial.size	0.999999999678234	0.999999999678234	Xkr4	FALSE
OK	negbinomial.size	0.999999999678234	0.999999999678234	Gm1992	FALSE
OK	negbinomial.size	0.999999999678234	0.999999999678234	Gm19938	FALSE
OK	negbinomial.size	0.999999999678234	0.999999999678234	Gm37381	FALSE
OK	negbinomial.size	0.999999999678234	0.999999999678234	Rp1	FALSE
OK	negbinomial.size	0.357750137302417	0.999999999678234	Sox17	FALSE
OK	negbinomial.size	0.999999999678234	0.999999999678234	Gm37587	FALSE
OK	negbinomial.size	0.999999999678234	0.999999999678234	Gm37323	FALSE
OK	negbinomial.size	0.153731476406457	0.999999999678234	Mrpl15	FALSE
OK	negbinomial.size	0.188726336775545	0.999999999678234	Lypla1	FALSE
OK	negbinomial.size	0.945767841653835	0.999999999678234	Tcea1	TRUE
OK	negbinomial.size	0.999999999678234	0.999999999678234	Rgs20	FALSE
OK	negbinomial.size	0.999999999678234	0.999999999678234	Gm16041	FALSE
OK	negbinomial.size	0.629759916901438	0.999999999678234	Atp6v1h	FALSE
OK	negbinomial.size	0.999999999678234	0.999999999678234	Oprk1	FALSE
OK	negbinomial.size	0.999999999678234	0.999999999678234	Npbwr1	FALSE
OK	negbinomial.size	0.692225196759774	0.999999999678234	Rb1cc1	TRUE
OK	negbinomial.size	0.0960592248315252	0.999999999678234	4732440D04Rik	TRUE
OK	negbinomial.size	0.999999999678234	0.999999999678234	Alkal1	FALSE
OK	negbinomial.size	0.999999999678234	0.999999999678234	St18	FALSE
OK	negbinomial.size	0.262672416270091	0.999999999678234	Pcmtd1	TRUE
OK	negbinomial.size	0.999999999678234	0.999999999678234	Gm26901	FALSE
OK	negbinomial.size	0.999999999678234	0.999999999678234	Gm30414	FALSE
OK	negbinomial.size	0.999999999678234	0.999999999678234	Sntg1	FALSE
OK	negbinomial.size	0.999999999678234	0.999999999678234	Rrs1	FALSE
OK	negbinomial.size	0.999999999678234	0.999999999678234	Adhfe1	FALSE
OK	negbinomial.size	0.999999999678234	0.999999999678234	2610203C22Rik	FALSE
OK	negbinomial.size	0.999999999678234	0.999999999678234	Vxn	FALSE
OK	negbinomial.size	0.999999999678234	0.999999999678234	Gm29520	FALSE
OK	negbinomial.size	0.357750137302412	0.999999999678234	Mybl1	FALSE
OK	negbinomial.size	0.0319522575505225	0.734419165753492	Vcpip1	FALSE
OK	negbinomial.size	0.999999999678234	0.999999999678234	1700034P13Rik	FALSE
OK	negbinomial.size	0.37948591774462	0.999999999678234	Sgk3	TRUE
OK	negbinomial.size	0.153731476406457	0.999999999678234	Mcmdc2	FALSE
OK	negbinomial.size	0.999999998712934	0.999999999678234	Snhg6	FALSE
OK	negbinomial.size	0.999999999442684	0.999999999678234	Tcf24	FALSE
OK	negbinomial.size	0.00155043615317682	0.0877084451915553	Ppp1r42	TRUE
OK	negbinomial.size	0.999999999678234	0.999999999678234	Gm15818	FALSE
OK	negbinomial.size	0.768991854131868	0.999999999678234	Cops5	FALSE
OK	negbinomial.size	0.028478283461406	0.696195792428382	Cspp1	TRUE
OK	negbinomial.size	0.925477324916514	0.999999999678234	Arfgef1	TRUE
OK	negbinomial.size	0.357750137302412	0.999999999678234	Cpa6	FALSE
OK	negbinomial.size	0.999999999678234	0.999999999678234	Prex2	FALSE
OK	negbinomial.size	0.999999999678234	0.999999999678234	A830018L16Rik	FALSE
OK	negbinomial.size	0.999999999678234	0.999999999678234	Gm17644	FALSE
OK	negbinomial.size	0.999999999678234	0.999999999678234	Gm29663	FALSE
OK	negbinomial.size	0.999999999678234	0.999999999678234	Sulf1	FALSE
OK	negbinomial.size	0.999999999678234	0.999999999678234	Slco5a1	FALSE
OK	negbinomial.size	0.999999999678234	0.999999999678234	Gm29283	FALSE
OK	negbinomial.size	0.999999999678234	0.999999999678234	Prdm14	FALSE
OK	negbinomial.size	0.164123500047976	0.999999999678234	Ncoa2	TRUE
OK	negbinomial.size	0.999999999678234	0.999999999678234	Gm29570	FALSE
OK	negbinomial.size	0.946498460753989	0.999999999678234	Tram1	TRUE
OK	negbinomial.size	0.180331983751528	0.999999999678234	Lactb2	FALSE
OK	negbinomial.size	0.999999999678234	0.999999999678234	Xkr9	FALSE
OK	negbinomial.size	0.999999999678234	0.999999999678234	Eya1	FALSE
OK	negbinomial.size	0.999999999678234	0.999999999678234	Gm9947	FALSE
OK	negbinomial.size	0.999999999678234	0.999999999678234	Msc	FALSE
OK	negbinomial.size	0.999999999678234	0.999999999678234	Trpa1	FALSE
OK	negbinomial.size	0.999999999678234	0.999999999678234	Kcnb2	FALSE
OK	negbinomial.size	0.860997240019047	0.999999999678234	Terf1	FALSE
OK	negbinomial.size	0.999999999678234	0.999999999678234	Sbspon	FALSE
OK	negbinomial.size	0.999999999678234	0.999999999678234	4930444P10Rik	FALSE
OK	negbinomial.size	3.08839919687261e-09	7.54435091690585e-07	Rpl7	TRUE
OK	negbinomial.size	0.567341642930479	0.999999999678234	Rdh10	FALSE
OK	negbinomial.size	0.999999999678234	0.999999999678234	Gm28095	FALSE
OK	negbinomial.size	0.999999999442684	0.999999999678234	Stau2	FALSE
OK	negbinomial.size	0.999999999678234	0.999999999678234	Gm7568	FALSE
OK	negbinomial.size	0.393759745516528	0.999999999678234	Ube2w	TRUE
OK	negbinomial.size	0.724016037910432	0.999999999678234	Eloc	TRUE
OK	negbinomial.size	0.999999999678234	0.999999999678234	D030040B21Rik	FALSE
OK	negbinomial.size	0.329372941557297	0.999999999678234	Tmem70	FALSE
OK	negbinomial.size	0.0520688919974741	0.971200504098994	Ly96	TRUE
OK	negbinomial.size	0.999999999678234	0.999999999678234	Gm28376	FALSE
OK	negbinomial.size	0.999999999678234	0.999999999678234	Jph1	FALSE
OK	negbinomial.size	0.999999999678234	0.999999999678234	Gm28783	FALSE
OK	negbinomial.size	0.999999999678234	0.999999999678234	Gdap1	FALSE
OK	negbinomial.size	0.999999999678234	0.999999999678234	Gm28784	FALSE
OK	negbinomial.size	0.999999999678234	0.999999999678234	Pi15	FALSE
OK	negbinomial.size	0.999999999678234	0.999999999678234	Gm28154	FALSE
OK	negbinomial.size	0.999999999678234	0.999999999678234	Gm16070	FALSE
OK	negbinomial.size	0.999999999678234	0.999999999678234	Crispld1	FALSE
OK	negbinomial.size	0.999999999678234	0.999999999678234	Gm28153	FALSE
OK	negbinomial.size	0.999999999678234	0.999999999678234	Gm28756	FALSE
OK	negbinomial.size	0.999999999678234	0.999999999678234	Crisp4	FALSE
OK	negbinomial.size	0.999999999678234	0.999999999678234	Defb18	FALSE
OK	negbinomial.size	0.999999999678234	0.999999999678234	Defb41	FALSE
OK	negbinomial.size	0.999999999678234	0.999999999678234	Gm15825	FALSE
OK	negbinomial.size	0.999999999678234	0.999999999678234	Tfap2d	FALSE
OK	negbinomial.size	0.999999999678234	0.999999999678234	Tfap2b	FALSE
OK	negbinomial.size	0.999999999678234	0.999999999678234	Gm28340	FALSE
OK	negbinomial.size	0.999999999678234	0.999999999678234	Pkhd1	FALSE
OK	negbinomial.size	0.999999999678234	0.999999999678234	4930486I03Rik	FALSE
OK	negbinomial.size	0.999999999678234	0.999999999678234	Gm28653	FALSE
OK	negbinomial.size	0.999999999678234	0.999999999678234	Il17a	FALSE
OK	negbinomial.size	0.999999999678234	0.999999999678234	Il17f	FALSE
OK	negbinomial.size	0.15132241701248	0.999999999678234	Mcm3	FALSE
OK	negbinomial.size	0.999999999678234	0.999999999678234	Gm28065	FALSE
OK	negbinomial.size	0.999999999678234	0.999999999678234	6720483E21Rik	FALSE
OK	negbinomial.size	0.999999999678234	0.999999999678234	Paqr8	FALSE
OK	negbinomial.size	0.999999999678234	0.999999999678234	Efhc1	FALSE
OK	negbinomial.size	0.161701197399318	0.999999999678234	Tram2	FALSE
OK	negbinomial.size	0.999999999678234	0.999999999678234	Gm28287	FALSE
OK	negbinomial.size	0.999999999678234	0.999999999678234	Tmem14a	FALSE
OK	negbinomial.size	0.999999999678234	0.999999999678234	Gsta3	FALSE
OK	negbinomial.size	0.999999999678234	0.999999999678234	Gm28836	FALSE
OK	negbinomial.size	0.999999999678234	0.999999999678234	Khdc1a	FALSE
OK	negbinomial.size	0.999999999678234	0.999999999678234	Khdc1c	FALSE
OK	negbinomial.size	0.999999999678234	0.999999999678234	Khdc1b	FALSE
OK	negbinomial.size	0.999999999678234	0.999999999678234	Kcnq5	FALSE
OK	negbinomial.size	0.999999999678234	0.999999999678234	Rims1	FALSE
OK	negbinomial.size	0.999999999678234	0.999999999678234	Gm29506	FALSE
OK	negbinomial.size	0.999999999678234	0.999999999678234	4933415F23Rik	FALSE
OK	negbinomial.size	0.999999999678234	0.999999999678234	Gm27028	FALSE
OK	negbinomial.size	0.999999999678234	0.999999999678234	Gm29107	FALSE
OK	negbinomial.size	0.412957356132968	0.999999999678234	Ogfrl1	TRUE
OK	negbinomial.size	0.999999999678234	0.999999999678234	Gm28822	FALSE
OK	negbinomial.size	0.197326362681086	0.999999999678234	B3gat2	FALSE
OK	negbinomial.size	0.111339878758867	0.999999999678234	Smap1	TRUE
OK	negbinomial.size	0.999999998712934	0.999999999678234	Sdhaf4	FALSE
OK	negbinomial.size	0.999999999678234	0.999999999678234	Fam135a	FALSE
OK	negbinomial.size	0.999999999678234	0.999999999678234	Col9a1	FALSE
OK	negbinomial.size	0.999999999678234	0.999999999678234	Col19a1	FALSE
OK	negbinomial.size	0.171244560559706	0.999999999678234	Lmbrd1	TRUE
OK	negbinomial.size	0.999999999678234	0.999999999678234	Gm28237	FALSE
OK	negbinomial.size	0.999999999678234	0.999999999678234	Gm29414	FALSE
OK	negbinomial.size	0.999999999678234	0.999999999678234	Adgrb3	FALSE
OK	negbinomial.size	0.999999999678234	0.999999999678234	4931408C20Rik	FALSE
OK	negbinomial.size	0.999999999678234	0.999999999678234	Gm5524	FALSE
OK	negbinomial.size	0.999999999678234	0.999999999678234	Gm597	FALSE
OK	negbinomial.size	0.999999999678234	0.999999999678234	Gm9898	FALSE
OK	negbinomial.size	0.669490965510509	0.999999999678234	Phf3	TRUE
OK	negbinomial.size	0.046469431941453	0.919804735858044	Ptp4a1	FALSE
OK	negbinomial.size	0.999999999678234	0.999999999678234	Gm5698	FALSE
OK	negbinomial.size	0.197326362681084	0.999999999678234	4931428L18Rik	FALSE
OK	negbinomial.size	0.999999999678234	0.999999999678234	Gm28644	FALSE
OK	negbinomial.size	0.999999999678234	0.999999999678234	Gm29128	FALSE
OK	negbinomial.size	0.999999999678234	0.999999999678234	Lgsn	FALSE
OK	negbinomial.size	0.999999999678234	0.999999999678234	Pih1d3	FALSE
OK	negbinomial.size	0.999999999678234	0.999999999678234	Khdrbs2	FALSE
OK	negbinomial.size	0.999999999678234	0.999999999678234	Gm5415	FALSE
OK	negbinomial.size	0.999999999678234	0.999999999678234	Gm37724	FALSE
OK	negbinomial.size	0.999999999678234	0.999999999678234	Gm37591	FALSE
OK	negbinomial.size	0.999999999678234	0.999999999678234	Prim2	FALSE
OK	negbinomial.size	0.910856208811576	0.999999999678234	Rab23	FALSE
OK	negbinomial.size	0.999999999678234	0.999999999678234	Bag2	FALSE
OK	negbinomial.size	0.902904847401413	0.999999999678234	Zfp451	FALSE
OK	negbinomial.size	0.999999999678234	0.999999999678234	Bend6	FALSE
OK	negbinomial.size	0.357750137302401	0.999999999678234	Dst	FALSE
OK	negbinomial.size	0.999999999678234	0.999999999678234	Gm26788	FALSE
OK	negbinomial.size	0.999999999678234	0.999999999678234	Gm37958	FALSE
OK	negbinomial.size	0.237837384395065	0.999999999678234	Gm37233	FALSE
OK	negbinomial.size	0.512442143203259	0.999999999678234	Ccdc115	FALSE
OK	negbinomial.size	0.999999999678234	0.999999999678234	Gm28306	FALSE
OK	negbinomial.size	0.0279589336363196	0.686100795743623	Imp4	FALSE
OK	negbinomial.size	0.911576789127316	0.999999999678234	Ptpn18	TRUE
OK	negbinomial.size	0.999999999442684	0.999999999678234	Gm28417	FALSE
OK	negbinomial.size	0.999999999678234	0.999999999678234	4930568A12Rik	FALSE
OK	negbinomial.size	0.999999999678234	0.999999999678234	Prss39	FALSE
OK	negbinomial.size	0.999999999678234	0.999999999678234	Cfc1	FALSE
OK	negbinomial.size	0.999999999678234	0.999999999678234	Prss40	FALSE
OK	negbinomial.size	0.999999999678234	0.999999999678234	1700101I19Rik	FALSE
OK	negbinomial.size	0.999999999678234	0.999999999678234	Amer3	FALSE
OK	negbinomial.size	0.0332705213713911	0.751749034753788	Arhgef4	FALSE
OK	negbinomial.size	0.999999999678234	0.999999999678234	Gm38336	FALSE
OK	negbinomial.size	0.653838614941127	0.999999999678234	Fam168b	TRUE
OK	negbinomial.size	0.261145378759693	0.999999999678234	Plekhb2	FALSE
OK	negbinomial.size	0.999999999678234	0.999999999678234	Gm37068	FALSE
OK	negbinomial.size	0.999999999678234	0.999999999678234	Gm28415	FALSE
OK	negbinomial.size	0.999999999678234	0.999999999678234	1110002O04Rik	FALSE
OK	negbinomial.size	0.999999999678234	0.999999999678234	Gm37146	FALSE
OK	negbinomial.size	0.999999999678234	0.999999999678234	Gm33222	FALSE
OK	negbinomial.size	0.999999999678234	0.999999999678234	4930535G08Rik	FALSE
OK	negbinomial.size	0.171241322436673	0.999999999678234	Hs6st1	FALSE
OK	negbinomial.size	0.999999999678234	0.999999999678234	Gm37335	FALSE
OK	negbinomial.size	0.999999999678234	0.999999999678234	Gm33280	FALSE
OK	negbinomial.size	0.0315280532285322	0.728761345056645	Uggt1	FALSE
OK	negbinomial.size	1.56713527332013e-08	3.43756985634065e-06	Neurl3	TRUE
OK	negbinomial.size	0.000290018580977141	0.0221934555871339	Arid5a	TRUE
OK	negbinomial.size	0.268559528626974	0.999999999678234	4930403P22Rik	FALSE
OK	negbinomial.size	0.165574162911199	0.999999999678234	Kansl3	FALSE
OK	negbinomial.size	0.999999999678234	0.999999999678234	Fer1l5	FALSE
OK	negbinomial.size	0.250849577287211	0.999999999678234	Lman2l	FALSE
OK	negbinomial.size	0.681552058015671	0.999999999678234	Cnnm4	FALSE
OK	negbinomial.size	0.498548768041817	0.999999999678234	Cnnm3	FALSE
OK	negbinomial.size	0.999999999678234	0.999999999678234	Gm38033	FALSE
OK	negbinomial.size	0.999999999678234	0.999999999678234	Ankrd23	FALSE
OK	negbinomial.size	0.171241322436679	0.999999999678234	Ankrd39	FALSE
OK	negbinomial.size	0.999999999678234	0.999999999678234	Sema4c	FALSE
OK	negbinomial.size	0.999999999678234	0.999999999678234	D430040D24Rik	FALSE
OK	negbinomial.size	0.999999999678234	0.999999999678234	Fam178b	FALSE
OK	negbinomial.size	0.0509824487007719	0.958000616757802	Cox5b	TRUE
OK	negbinomial.size	0.0115268796728417	0.384766288872444	Actr1b	FALSE
OK	negbinomial.size	0.999999999678234	0.999999999678234	4933424G06Rik	FALSE
OK	negbinomial.size	0.999999999678234	0.999999999678234	Gm33533	FALSE
OK	negbinomial.size	0.10194476849443	0.999999999678234	Zap70	FALSE
OK	negbinomial.size	0.45084647973668	0.999999999678234	Tmem131	TRUE
OK	negbinomial.size	0.999999999109069	0.999999999678234	Gm38115	FALSE
OK	negbinomial.size	0.999999999678234	0.999999999678234	Vwa3b	FALSE
OK	negbinomial.size	0.999999999678234	0.999999999678234	Gm37020	FALSE
OK	negbinomial.size	0.999999999678234	0.999999999678234	Cnga3	FALSE
OK	negbinomial.size	0.755672476765766	0.999999999678234	Inpp4a	TRUE
OK	negbinomial.size	0.999999999678234	0.999999999678234	4930439A04Rik	FALSE
OK	negbinomial.size	0.529187312362692	0.999999999678234	Coa5	FALSE
OK	negbinomial.size	0.679702253823474	0.999999999678234	Unc50	TRUE
OK	negbinomial.size	0.296730171905233	0.999999999678234	Mgat4a	FALSE
OK	negbinomial.size	0.999999999678234	0.999999999678234	2010300C02Rik	FALSE
OK	negbinomial.size	0.999999999678234	0.999999999678234	4930556I23Rik	FALSE
OK	negbinomial.size	0.357750137302406	0.999999999678234	Tsga10	FALSE
OK	negbinomial.size	0.999999999678234	0.999999999678234	Gm26805	FALSE
OK	negbinomial.size	0.999999999678234	0.999999999678234	Lipt1	FALSE
OK	negbinomial.size	0.309374736834635	0.999999999678234	Mitd1	FALSE
OK	negbinomial.size	0.31115953102993	0.999999999678234	Mrpl30	TRUE
OK	negbinomial.size	0.999999999678234	0.999999999678234	Lyg2	FALSE
OK	negbinomial.size	0.999999999678234	0.999999999678234	Gm15457	FALSE
OK	negbinomial.size	0.999999999678234	0.999999999678234	Lyg1	FALSE
OK	negbinomial.size	0.0493650929147393	0.942996102509341	Txndc9	FALSE
OK	negbinomial.size	0.031272273463405	0.727137486034742	Eif5b	FALSE
OK	negbinomial.size	0.0655513957505141	0.999999999678234	Rev1	FALSE
OK	negbinomial.size	0.999999999678234	0.999999999678234	Gm37062	FALSE
OK	negbinomial.size	0.999999999678234	0.999999999678234	Gm5099	FALSE
OK	negbinomial.size	0.999999999678234	0.999999999678234	Aff3	FALSE
OK	negbinomial.size	0.999999999678234	0.999999999678234	Gm16150	FALSE
OK	negbinomial.size	0.999999999678234	0.999999999678234	Gm16151	FALSE
OK	negbinomial.size	0.999999999678234	0.999999999678234	Gm16152	FALSE
OK	negbinomial.size	0.999999999678234	0.999999999678234	Lonrf2	FALSE
OK	negbinomial.size	0.999999999678234	0.999999999678234	Chst10	FALSE
OK	negbinomial.size	0.999999999678234	0.999999999678234	Gm37707	FALSE
OK	negbinomial.size	0.999999999678234	0.999999999678234	Nms	FALSE
OK	negbinomial.size	0.359048621374968	0.999999999678234	Pdcl3	TRUE
OK	negbinomial.size	0.999999999678234	0.999999999678234	Gm37821	FALSE
OK	negbinomial.size	0.999999999678234	0.999999999678234	Npas2	FALSE
OK	negbinomial.size	0.000645777809875652	0.0433345728816147	Rpl31	TRUE
OK	negbinomial.size	0.00675090402152805	0.267423710287681	Tbc1d8	TRUE
OK	negbinomial.size	0.171241322436681	0.999999999678234	Cnot11	FALSE
OK	negbinomial.size	3.88736103520657e-05	0.00405418582674599	Gm15832	TRUE
OK	negbinomial.size	4.16582828041802e-06	0.000566781151485566	Rnf149	TRUE
OK	negbinomial.size	0.153731476406456	0.999999999678234	Creg2	FALSE
OK	negbinomial.size	0.999999999678234	0.999999999678234	D930019O06Rik	FALSE
OK	negbinomial.size	0.999999999678234	0.999999999678234	Rfx8	FALSE
OK	negbinomial.size	0.999999999678234	0.999999999678234	Gm3646	FALSE
OK	negbinomial.size	0.999999999678234	0.999999999678234	1700066B17Rik	FALSE
OK	negbinomial.size	0.0918073997388155	0.999999999678234	Map4k4	TRUE
OK	negbinomial.size	2.5523813584435e-20	2.48748372803947e-17	Il1r2	TRUE
OK	negbinomial.size	0.136730775459594	0.999999999678234	Gm16894	FALSE
OK	negbinomial.size	0.329372941557296	0.999999999678234	Il1r1	FALSE
OK	negbinomial.size	0.999999999678234	0.999999999678234	Il1rl2	FALSE
OK	negbinomial.size	0.999999999678234	0.999999999678234	Il1rl1	FALSE
OK	negbinomial.size	0.175771733153175	0.999999999678234	Il18r1	FALSE
OK	negbinomial.size	0.00991810827126426	0.34968705547704	Il18rap	TRUE
OK	negbinomial.size	0.999999999678234	0.999999999678234	Gm35801	FALSE
OK	negbinomial.size	0.999999999678234	0.999999999678234	Slc9a4	FALSE
OK	negbinomial.size	0.999999999678234	0.999999999678234	Slc9a2	FALSE
OK	negbinomial.size	0.999999999678234	0.999999999678234	Gm37623	FALSE
OK	negbinomial.size	0.999999999678234	0.999999999678234	Gm37915	FALSE
OK	negbinomial.size	0.999999999678234	0.999999999678234	Mfsd9	FALSE
OK	negbinomial.size	0.999999999678234	0.999999999678234	Tmem182	FALSE
OK	negbinomial.size	0.999999999678234	0.999999999678234	4930448I06Rik	FALSE
OK	negbinomial.size	0.999999999678234	0.999999999678234	Gm28634	FALSE
OK	negbinomial.size	0.999999999678234	0.999999999678234	Gm29260	FALSE
OK	negbinomial.size	0.999999999678234	0.999999999678234	Gm9915	FALSE
OK	negbinomial.size	0.999999999678234	0.999999999678234	Gm29664	FALSE
OK	negbinomial.size	0.999999999678234	0.999999999678234	Gm28175	FALSE
OK	negbinomial.size	0.999999999678234	0.999999999678234	Gm28140	FALSE
OK	negbinomial.size	0.999999999678234	0.999999999678234	Pantr1	FALSE
OK	negbinomial.size	0.999999999678234	0.999999999678234	Gm20646	FALSE
OK	negbinomial.size	0.999999999678234	0.999999999678234	Pou3f3	FALSE
OK	negbinomial.size	0.999999999678234	0.999999999678234	Pantr2	FALSE
OK	negbinomial.size	0.999999999678234	0.999999999678234	Dalir	FALSE
OK	negbinomial.size	0.0958559394766936	0.999999999678234	Mrps9	FALSE
OK	negbinomial.size	0.999999999678234	0.999999999678234	Gpr45	FALSE
OK	negbinomial.size	0.468876154016917	0.999999999678234	Tgfbrap1	FALSE
OK	negbinomial.size	0.999999999678234	0.999999999678234	Gm28782	FALSE
OK	negbinomial.size	0.999999999678234	0.999999999678234	8430432A02Rik	FALSE
OK	negbinomial.size	0.197326362681083	0.999999999678234	AI597479	FALSE
OK	negbinomial.size	0.999999999678234	0.999999999678234	Fhl2	FALSE
OK	negbinomial.size	0.999999999678234	0.999999999678234	Gm29040	FALSE
OK	negbinomial.size	0.32937294155729	0.999999999678234	Nck2	FALSE
OK	negbinomial.size	0.999999999678234	0.999999999678234	Ecrg4	FALSE
OK	negbinomial.size	0.999999999678234	0.999999999678234	Gm29155	FALSE
OK	negbinomial.size	0.999999999678234	0.999999999678234	Gm29157	FALSE
OK	negbinomial.size	0.999999999678234	0.999999999678234	Gm29156	FALSE
OK	negbinomial.size	0.180331983751532	0.999999999678234	Uxs1	FALSE
OK	negbinomial.size	0.470438841676605	0.999999999678234	Tpp2	FALSE
OK	negbinomial.size	0.999999999678234	0.999999999678234	Mettl21c	FALSE
OK	negbinomial.size	0.00615956669295832	0.251411681030938	Gm8251	FALSE
OK	negbinomial.size	0.0319337214420022	0.734419165753492	Tex30	FALSE
OK	negbinomial.size	0.999999999678234	0.999999999678234	Poglut2	FALSE
OK	negbinomial.size	0.999999999678234	0.999999999678234	Bivm	FALSE
OK	negbinomial.size	0.999999999678234	0.999999999678234	Ercc5	FALSE
OK	negbinomial.size	0.999999999678234	0.999999999678234	Mettl21e	FALSE
OK	negbinomial.size	0.999999999678234	0.999999999678234	Gm28893	FALSE
OK	negbinomial.size	0.999999999678234	0.999999999678234	Gulp1	FALSE
OK	negbinomial.size	0.999999999678234	0.999999999678234	4930521E06Rik	FALSE
OK	negbinomial.size	0.999999999678234	0.999999999678234	Col3a1	FALSE
OK	negbinomial.size	0.999999999678234	0.999999999678234	Col5a2	FALSE
OK	negbinomial.size	0.999999999678234	0.999999999678234	Wdr75	FALSE
OK	negbinomial.size	0.999999999678234	0.999999999678234	Gm5269	FALSE
OK	negbinomial.size	0.454569712430669	0.999999999678234	Slc40a1	TRUE
OK	negbinomial.size	0.999999999678234	0.999999999678234	Dnah7b	FALSE
OK	negbinomial.size	0.999999999678234	0.999999999678234	Dnah7c	FALSE
OK	negbinomial.size	0.999999999678234	0.999999999678234	Slc39a10	FALSE
OK	negbinomial.size	0.999999999678234	0.999999999678234	Gm28151	FALSE
OK	negbinomial.size	0.999999999678234	0.999999999678234	Gm28826	FALSE
OK	negbinomial.size	0.999999999678234	0.999999999678234	C230029F24Rik	FALSE
OK	negbinomial.size	0.999999999678234	0.999999999678234	4933411E06Rik	FALSE
OK	negbinomial.size	0.999999999678234	0.999999999678234	Gm29665	FALSE
OK	negbinomial.size	0.999999999678234	0.999999999678234	Gm28321	FALSE
OK	negbinomial.size	0.999999999678234	0.999999999678234	Tmeff2	FALSE
OK	negbinomial.size	0.999999999678234	0.999999999678234	Gm28322	FALSE
OK	negbinomial.size	0.999999999678234	0.999999999678234	Gm28319	FALSE
OK	negbinomial.size	0.999999999678234	0.999999999678234	Gm28320	FALSE
OK	negbinomial.size	0.999999999678234	0.999999999678234	Gm29325	FALSE
OK	negbinomial.size	0.999999999678234	0.999999999678234	9330175M20Rik	FALSE
OK	negbinomial.size	0.357750137302417	0.999999999678234	Cavin2	FALSE
OK	negbinomial.size	0.999999999678234	0.999999999678234	1700072G22Rik	FALSE
OK	negbinomial.size	0.0121395989370076	0.400005010490247	Nabp1	TRUE
OK	negbinomial.size	0.999999999678234	0.999999999678234	Gm17767	FALSE
OK	negbinomial.size	0.999999999678234	0.999999999678234	Gm28055	FALSE
OK	negbinomial.size	0.999999999678234	0.999999999678234	Myo1b	FALSE
OK	negbinomial.size	0.999999999678234	0.999999999678234	Gm29453	FALSE
OK	negbinomial.size	0.999999999678234	0.999999999678234	Gm28323	FALSE
OK	negbinomial.size	0.490560431075038	0.999999999678234	Stat4	FALSE
OK	negbinomial.size	0.999999999678234	0.999999999678234	Gm31812	FALSE
OK	negbinomial.size	0.189541518926446	0.999999999678234	Stat1	TRUE
OK	negbinomial.size	0.000710310746562049	0.0474202277906693	Gls	TRUE
OK	negbinomial.size	0.430933378702495	0.999999999678234	Nab1	TRUE
OK	negbinomial.size	0.999999999678234	0.999999999678234	Gm553	FALSE
OK	negbinomial.size	0.999999999678234	0.999999999678234	Gm28178	FALSE
OK	negbinomial.size	0.197326362681088	0.999999999678234	Nemp2	FALSE
OK	negbinomial.size	0.344049717013158	0.999999999678234	Mfsd6	TRUE
OK	negbinomial.size	0.999999999678234	0.999999999678234	Gm29670	FALSE
OK	negbinomial.size	0.714384361141701	0.999999999678234	Inpp1	TRUE
OK	negbinomial.size	0.854008689127898	0.999999999678234	Hibch	FALSE
OK	negbinomial.size	0.999999999678234	0.999999999678234	1700019D03Rik	FALSE
OK	negbinomial.size	0.999999999678234	0.999999999678234	Mstn	FALSE
OK	negbinomial.size	0.999999999678234	0.999999999678234	1700019A02Rik	FALSE
OK	negbinomial.size	0.999999999678234	0.999999999678234	Pms1	FALSE
OK	negbinomial.size	0.999999999678234	0.999999999678234	Gm28777	FALSE
OK	negbinomial.size	0.011613405758675	0.38652986242887	Ormdl1	FALSE
OK	negbinomial.size	0.095855939476696	0.999999999678234	Osgepl1	FALSE
OK	negbinomial.size	0.00367990627884709	0.169512254230606	Asnsd1	TRUE
OK	negbinomial.size	0.999999999678234	0.999999999678234	Asdurf	FALSE
OK	negbinomial.size	0.999999999678234	0.999999999678234	Dnah7a	FALSE
OK	negbinomial.size	4.82213686783491e-08	9.90380912760105e-06	Stk17b	TRUE
OK	negbinomial.size	0.999999999678234	0.999999999678234	Hecw2	FALSE
OK	negbinomial.size	0.999999999678234	0.999999999678234	Ccdc150	FALSE
OK	negbinomial.size	0.999999999442684	0.999999999678234	Gtf3c3	FALSE
OK	negbinomial.size	0.999999999678234	0.999999999678234	Gm34066	FALSE
OK	negbinomial.size	0.999999999678234	0.999999999678234	Pgap1	FALSE
OK	negbinomial.size	0.117725635726	0.999999999678234	Ankrd44	TRUE
OK	negbinomial.size	0.999999999678234	0.999999999678234	4930444A19Rik	FALSE
OK	negbinomial.size	9.40088954978527e-05	0.00876103131597764	Sf3b1	TRUE
OK	negbinomial.size	1.23847163016708e-06	0.000190164370070179	Coq10b	TRUE
OK	negbinomial.size	0.769450813230692	0.999999999678234	Hspd1	FALSE
OK	negbinomial.size	0.43174251145118	0.999999999678234	Hspe1	FALSE
OK	negbinomial.size	0.838328827303993	0.999999999678234	Mob4	TRUE
OK	negbinomial.size	0.999999999678234	0.999999999678234	Rftn2	FALSE
OK	negbinomial.size	0.999999999678234	0.999999999678234	Gm10561	FALSE
OK	negbinomial.size	0.999999999678234	0.999999999678234	Mars2	FALSE
OK	negbinomial.size	0.999999999678234	0.999999999678234	Boll	FALSE
OK	negbinomial.size	0.999999999678234	0.999999999678234	Plcl1	FALSE
OK	negbinomial.size	0.999999999678234	0.999999999678234	9130227L01Rik	FALSE
OK	negbinomial.size	0.999999999678234	0.999999999678234	1700003I22Rik	FALSE
OK	negbinomial.size	0.999999999678234	0.999999999678234	Gm28240	FALSE
OK	negbinomial.size	0.999999999678234	0.999999999678234	Hsfy2	FALSE
OK	negbinomial.size	0.999999999678234	0.999999999678234	Satb2	FALSE
OK	negbinomial.size	0.999999999678234	0.999999999678234	9130024F11Rik	FALSE
OK	negbinomial.size	0.999999999678234	0.999999999678234	1700126A01Rik	FALSE
OK	negbinomial.size	0.999999999678234	0.999999999678234	BC055402	FALSE
OK	negbinomial.size	0.999999999678234	0.999999999678234	4930558J18Rik	FALSE
OK	negbinomial.size	0.999999999442684	0.999999999678234	1700066M21Rik	FALSE
OK	negbinomial.size	0.999999999442684	0.999999999678234	Tyw5	FALSE
OK	negbinomial.size	0.815331076231675	0.999999999678234	Maip1	FALSE
OK	negbinomial.size	0.999999999678234	0.999999999678234	Spats2l	FALSE
OK	negbinomial.size	0.999999999678234	0.999999999678234	Gm17234	FALSE
OK	negbinomial.size	0.788303699267432	0.999999999678234	Kctd18	FALSE
OK	negbinomial.size	0.999999999678234	0.999999999678234	Sgo2a	FALSE
OK	negbinomial.size	0.999999999678234	0.999999999678234	Aox1	FALSE
OK	negbinomial.size	0.999999999678234	0.999999999678234	Aox3	FALSE
OK	negbinomial.size	0.999999999678234	0.999999999678234	Aox4	FALSE
OK	negbinomial.size	0.999999999678234	0.999999999678234	Gm15759	FALSE
OK	negbinomial.size	0.999999999678234	0.999999999678234	Aox2	FALSE
OK	negbinomial.size	0.548145207004207	0.999999999678234	Bzw1	TRUE
OK	negbinomial.size	0.00686526879973434	0.271620358831207	Clk1	TRUE
OK	negbinomial.size	0.312897690883986	0.999999999678234	Ppil3	FALSE
OK	negbinomial.size	0.329372941557299	0.999999999678234	Nif3l1	FALSE
OK	negbinomial.size	0.999999999109069	0.999999999678234	Orc2	FALSE
OK	negbinomial.size	0.999999999678234	0.999999999678234	Gm15834	FALSE
OK	negbinomial.size	0.161701197399323	0.999999999678234	Fam126b	FALSE
OK	negbinomial.size	0.00179448277566595	0.0983282709834021	Ndufb3	TRUE
OK	negbinomial.size	0.999999999678234	0.999999999678234	Flacc1	FALSE
OK	negbinomial.size	0.238161797107509	0.999999999678234	Cflar	TRUE
OK	negbinomial.size	0.189337084725131	0.999999999678234	Casp8	FALSE
OK	negbinomial.size	0.0302108613303484	0.712104791803734	Trak2	TRUE
OK	negbinomial.size	0.230715999314356	0.999999999678234	Stradb	FALSE
OK	negbinomial.size	0.999999999678234	0.999999999678234	C2cd6	FALSE
OK	negbinomial.size	0.999999999678234	0.999999999678234	AC169382.1	FALSE
OK	negbinomial.size	0.999999999678234	0.999999999678234	Gm29018	FALSE
OK	negbinomial.size	0.197326362681083	0.999999999678234	Tmem237	FALSE
OK	negbinomial.size	0.999999999678234	0.999999999678234	G730003C15Rik	FALSE
OK	negbinomial.size	0.999999999678234	0.999999999678234	Mpp4	FALSE
OK	negbinomial.size	0.999999999678234	0.999999999678234	Gm29017	FALSE
OK	negbinomial.size	0.529384321088519	0.999999999678234	Als2	FALSE
OK	negbinomial.size	0.999999999678234	0.999999999678234	Cdk15	FALSE
OK	negbinomial.size	0.999999999678234	0.999999999678234	Gm29016	FALSE
OK	negbinomial.size	0.240583316398724	0.999999999678234	Fzd7	FALSE
OK	negbinomial.size	0.999999999678234	0.999999999678234	Gm26813	FALSE
OK	negbinomial.size	0.999999999678234	0.999999999678234	Gm973	FALSE
OK	negbinomial.size	0.999999999678234	0.999999999678234	Gm28411	FALSE
OK	negbinomial.size	0.999999999678234	0.999999999678234	1700122D07Rik	FALSE
OK	negbinomial.size	0.601941108271718	0.999999999678234	Sumo1	TRUE
OK	negbinomial.size	0.329372941557294	0.999999999678234	Nop58	FALSE
OK	negbinomial.size	0.283925538560038	0.999999999678234	Bmpr2	FALSE
OK	negbinomial.size	0.328539140679342	0.999999999678234	Fam117b	TRUE
OK	negbinomial.size	0.999999999678234	0.999999999678234	Ica1l	FALSE
OK	negbinomial.size	0.999999999442684	0.999999999678234	Wdr12	FALSE
OK	negbinomial.size	0.999999999678234	0.999999999678234	Carf	FALSE
OK	negbinomial.size	0.0503116155710883	0.954854646315329	Nbeal1	TRUE
OK	negbinomial.size	0.999999999678234	0.999999999678234	Cyp20a1	FALSE
OK	negbinomial.size	0.999999999678234	0.999999999678234	Abi2	FALSE
OK	negbinomial.size	0.999999999678234	0.999999999678234	Raph1	FALSE
OK	negbinomial.size	0.218931620573181	0.999999999678234	Cd28	FALSE
OK	negbinomial.size	0.999999999678234	0.999999999678234	Gm11579	FALSE
OK	negbinomial.size	0.999999999678234	0.999999999678234	2310016D23Rik	FALSE
OK	negbinomial.size	0.329372941557299	0.999999999678234	Ctla4	FALSE
OK	negbinomial.size	0.0530689451172236	0.971200504098994	Icos	FALSE
OK	negbinomial.size	0.999999999678234	0.999999999678234	Gm28083	FALSE
OK	negbinomial.size	0.999999999678234	0.999999999678234	Gm11587	FALSE
OK	negbinomial.size	0.999999999678234	0.999999999678234	9530026F06Rik	FALSE
OK	negbinomial.size	0.999999999678234	0.999999999678234	Gm11588	FALSE
OK	negbinomial.size	0.999999999678234	0.999999999678234	Gm28449	FALSE
OK	negbinomial.size	0.999999999678234	0.999999999678234	4930587A21Rik	FALSE
OK	negbinomial.size	0.999999999678234	0.999999999678234	Pard3b	FALSE
OK	negbinomial.size	0.999999999678234	0.999999999678234	Pard3bos1	FALSE
OK	negbinomial.size	0.999999999678234	0.999999999678234	Pard3bos2	FALSE
OK	negbinomial.size	0.999999999678234	0.999999999678234	Pard3bos3	FALSE
OK	negbinomial.size	0.999999999678234	0.999999999678234	Gm29084	FALSE
OK	negbinomial.size	0.999999999678234	0.999999999678234	Nrp2	FALSE
OK	negbinomial.size	0.999999999678234	0.999999999678234	Gm29083	FALSE
OK	negbinomial.size	0.999999999678234	0.999999999678234	Gm4208	FALSE
OK	negbinomial.size	0.0621181736815241	0.999999999678234	Ino80d	TRUE
OK	negbinomial.size	0.357750137302418	0.999999999678234	Ino80dos	FALSE
OK	negbinomial.size	0.529384321088508	0.999999999678234	Gm20342	FALSE
OK	negbinomial.size	0.356234888601569	0.999999999678234	Ndufs1	FALSE
OK	negbinomial.size	0.251176249066596	0.999999999678234	Eef1b2	TRUE
OK	negbinomial.size	0.999999999678234	0.999999999678234	Gpr1	FALSE
OK	negbinomial.size	0.999999999678234	0.999999999678234	Platr12	FALSE
OK	negbinomial.size	0.999999999678234	0.999999999678234	Gm11608	FALSE
OK	negbinomial.size	0.999999999678234	0.999999999678234	Zdbf2	FALSE
OK	negbinomial.size	0.999999999678234	0.999999999678234	Adam23	FALSE
OK	negbinomial.size	0.999999999678234	0.999999999678234	Gm39653	FALSE
OK	negbinomial.size	0.999999999678234	0.999999999678234	Dytn	FALSE
OK	negbinomial.size	0.999999999678234	0.999999999678234	Mdh1b	FALSE
OK	negbinomial.size	0.999999999678234	0.999999999678234	Fastkd2	FALSE
OK	negbinomial.size	0.999999999678234	0.999999999678234	4933402D24Rik	FALSE
OK	negbinomial.size	0.999999999678234	0.999999999678234	Gm13749	FALSE
OK	negbinomial.size	0.963064258894419	0.999999999678234	Klf7	TRUE
OK	negbinomial.size	0.999999999678234	0.999999999678234	Gm13748	FALSE
OK	negbinomial.size	0.999999999678234	0.999999999678234	Gm28981	FALSE
OK	negbinomial.size	0.356906525210735	0.999999999678234	Creb1	TRUE
OK	negbinomial.size	0.999999999678234	0.999999999678234	Mettl21a	FALSE
OK	negbinomial.size	0.999999999678234	0.999999999678234	Gm28982	FALSE
OK	negbinomial.size	0.999999999678234	0.999999999678234	Gm29152	FALSE
OK	negbinomial.size	0.161701197399317	0.999999999678234	2810408I11Rik	FALSE
OK	negbinomial.size	0.342893698990194	0.999999999678234	Ccnyl1	FALSE
OK	negbinomial.size	0.0647161112123168	0.999999999678234	Fzd5	FALSE
OK	negbinomial.size	0.017489209084208	0.501279597262478	Plekhm3	TRUE
OK	negbinomial.size	0.999999999678234	0.999999999678234	Akr1cl	FALSE
OK	negbinomial.size	0.999999999678234	0.999999999678234	Cryge	FALSE
OK	negbinomial.size	0.999999999678234	0.999999999678234	Crygd	FALSE
OK	negbinomial.size	0.999999999678234	0.999999999678234	Crygc	FALSE
OK	negbinomial.size	0.999999999678234	0.999999999678234	Crygb	FALSE
OK	negbinomial.size	0.999999999678234	0.999999999678234	Cryga	FALSE
OK	negbinomial.size	0.999999999678234	0.999999999678234	D630023F18Rik	FALSE
OK	negbinomial.size	0.00934260794715035	0.336927453353421	Idh1	FALSE
OK	negbinomial.size	0.308339072069654	0.999999999678234	Pikfyve	FALSE
OK	negbinomial.size	0.999999999678234	0.999999999678234	Pth2r	FALSE
OK	negbinomial.size	0.999999999678234	0.999999999678234	Crygf	FALSE
OK	negbinomial.size	0.999999999678234	0.999999999678234	Map2	FALSE
OK	negbinomial.size	0.999999999678234	0.999999999678234	Gm10558	FALSE
OK	negbinomial.size	0.999999999678234	0.999999999678234	Unc80	FALSE
OK	negbinomial.size	0.000410506435992964	0.0294152952238732	Rpe	FALSE
OK	negbinomial.size	0.280399081045898	0.999999999678234	Kansl1l	FALSE
OK	negbinomial.size	0.156747430659601	0.999999999678234	Acadl	FALSE
OK	negbinomial.size	0.999999999678234	0.999999999678234	Myl1	FALSE
OK	negbinomial.size	0.999999999678234	0.999999999678234	Lancl1	FALSE
OK	negbinomial.size	0.999999999678234	0.999999999678234	Cps1	FALSE
OK	negbinomial.size	0.999999999678234	0.999999999678234	Gm15668	FALSE
OK	negbinomial.size	0.999999999678234	0.999999999678234	Gm15669	FALSE
OK	negbinomial.size	0.999999999678234	0.999999999678234	Gm15671	FALSE
OK	negbinomial.size	0.999999999678234	0.999999999678234	Erbb4	FALSE
OK	negbinomial.size	0.999999999678234	0.999999999678234	Gm16076	FALSE
OK	negbinomial.size	0.999999999678234	0.999999999678234	Gm28497	FALSE
OK	negbinomial.size	0.999999999678234	0.999999999678234	Gm29113	FALSE
OK	negbinomial.size	0.999999999678234	0.999999999678234	Gm29114	FALSE
OK	negbinomial.size	0.999999999678234	0.999999999678234	Ikzf2	FALSE
OK	negbinomial.size	0.999999999678234	0.999999999678234	Gm29112	FALSE
OK	negbinomial.size	0.999999999678234	0.999999999678234	Gm28112	FALSE
OK	negbinomial.size	0.999999999678234	0.999999999678234	Spag16	FALSE
OK	negbinomial.size	0.999999999678234	0.999999999678234	Vwc2l	FALSE
OK	negbinomial.size	0.999999999678234	0.999999999678234	Bard1	FALSE
OK	negbinomial.size	0.999999999678234	0.999999999678234	Abca12	FALSE
OK	negbinomial.size	0.268559528626974	0.999999999678234	Atic	FALSE
OK	negbinomial.size	0.999999999678234	0.999999999678234	Fn1	FALSE
OK	negbinomial.size	0.999999999678234	0.999999999678234	Apol7d	FALSE
OK	negbinomial.size	0.999999999678234	0.999999999678234	Gm8883	FALSE
OK	negbinomial.size	0.999999999678234	0.999999999678234	Gm28818	FALSE
OK	negbinomial.size	0.999999999678234	0.999999999678234	4933417E11Rik	FALSE
OK	negbinomial.size	0.999999999678234	0.999999999678234	4930556G22Rik	FALSE
OK	negbinomial.size	0.999999999678234	0.999999999678234	Gm4319	FALSE
OK	negbinomial.size	0.357750137302411	0.999999999678234	Mreg	FALSE
OK	negbinomial.size	0.999999999678234	0.999999999678234	Pecr	FALSE
OK	negbinomial.size	0.999999999678234	0.999999999678234	Tmem169	FALSE
OK	negbinomial.size	0.357750137302412	0.999999999678234	Xrcc5	FALSE
OK	negbinomial.size	0.999999999678234	0.999999999678234	March4	FALSE
OK	negbinomial.size	0.999999999442684	0.999999999678234	Smarcal1	FALSE
OK	negbinomial.size	0.999999999678234	0.999999999678234	Gm39662	FALSE
OK	negbinomial.size	0.999999999678234	0.999999999678234	Ankar	FALSE
OK	negbinomial.size	0.0465159185354757	0.919804735858044	Rpl37a	TRUE
OK	negbinomial.size	0.999999999678234	0.999999999678234	Igfbp2	FALSE
OK	negbinomial.size	0.999999999678234	0.999999999678234	Igfbp5	FALSE
OK	negbinomial.size	0.999999999678234	0.999999999678234	1700027A15Rik	FALSE
OK	negbinomial.size	0.999999999678234	0.999999999678234	Tnp1	FALSE
OK	negbinomial.size	0.999999999678234	0.999999999678234	Gm29185	FALSE
OK	negbinomial.size	0.999999999678234	0.999999999678234	Pinc	FALSE
OK	negbinomial.size	0.999999999678234	0.999999999678234	D530049I02Rik	FALSE
OK	negbinomial.size	0.999999999678234	0.999999999678234	C530043A13Rik	FALSE
OK	negbinomial.size	0.999999999678234	0.999999999678234	Gm29186	FALSE
OK	negbinomial.size	0.999999999678234	0.999999999678234	6030407O03Rik	FALSE
OK	negbinomial.size	0.999999999678234	0.999999999678234	Gm29183	FALSE
OK	negbinomial.size	0.27082453250474	0.999999999678234	Tns1	FALSE
OK	negbinomial.size	0.0143249355470262	0.45064150898913	Rufy4	TRUE
OK	negbinomial.size	6.67270132461931e-05	0.00648076066904667	Cxcr2	TRUE
OK	negbinomial.size	0.00180923932207588	0.0988795287124351	Cxcr1	TRUE
OK	negbinomial.size	0.365276635729087	0.999999999678234	Arpc2	TRUE
OK	negbinomial.size	0.999999999678234	0.999999999678234	Gpbar1	FALSE
OK	negbinomial.size	0.244723464002498	0.999999999678234	Aamp	TRUE
OK	negbinomial.size	0.999999999678234	0.999999999678234	Gm28364	FALSE
OK	negbinomial.size	0.854954197925192	0.999999999678234	Pnkd	FALSE
OK	negbinomial.size	0.111765610288394	0.999999999678234	Tmbim1	FALSE
OK	negbinomial.size	0.999999999678234	0.999999999678234	Gm29358	FALSE
OK	negbinomial.size	0.0428889591627553	0.873231687988217	Catip	FALSE
OK	negbinomial.size	0.0147186241996522	0.457668309853217	Slc11a1	TRUE
OK	negbinomial.size	0.110992986147924	0.999999999678234	Ctdsp1	TRUE
OK	negbinomial.size	0.999999999678234	0.999999999678234	Vil1	FALSE
OK	negbinomial.size	3.55925925047644e-05	0.00383840516828137	Usp37	FALSE
OK	negbinomial.size	0.999999999678234	0.999999999678234	Cnot9	FALSE
OK	negbinomial.size	0.999999999678234	0.999999999678234	Plcd4	FALSE
OK	negbinomial.size	0.312897690883989	0.999999999678234	Zfp142	FALSE
OK	negbinomial.size	0.999999999109069	0.999999999678234	Bcs1l	FALSE
OK	negbinomial.size	0.0398494018205333	0.839284103006595	Rnf25	FALSE
OK	negbinomial.size	0.999999999109069	0.999999999678234	Stk36	FALSE
OK	negbinomial.size	0.999999999678234	0.999999999678234	Ttll4	FALSE
OK	negbinomial.size	0.999999999678234	0.999999999678234	Cyp27a1	FALSE
OK	negbinomial.size	0.999999999678234	0.999999999678234	Prkag3	FALSE
OK	negbinomial.size	0.999999999678234	0.999999999678234	Wnt6	FALSE
OK	negbinomial.size	0.999999999678234	0.999999999678234	Gm29539	FALSE
OK	negbinomial.size	0.999999999678234	0.999999999678234	Wnt10a	FALSE
OK	negbinomial.size	0.999999999678234	0.999999999678234	Gm16582	FALSE
OK	negbinomial.size	0.999999999678234	0.999999999678234	Cdk5r2	FALSE
OK	negbinomial.size	0.999999999678234	0.999999999678234	Fev	FALSE
OK	negbinomial.size	0.999999999678234	0.999999999678234	Cryba2	FALSE
OK	negbinomial.size	0.999999999678234	0.999999999678234	Cfap65	FALSE
OK	negbinomial.size	0.999999999678234	0.999999999678234	Gm15841	FALSE
OK	negbinomial.size	0.999999999678234	0.999999999678234	Ihh	FALSE
OK	negbinomial.size	0.22392675017519	0.999999999678234	Nhej1	FALSE
OK	negbinomial.size	0.999999999678234	0.999999999678234	Slc23a3	FALSE
OK	negbinomial.size	0.00412893346886935	0.18542821685751	Cnppd1	TRUE
OK	negbinomial.size	0.481290506725152	0.999999999678234	Retreg2	TRUE
OK	negbinomial.size	0.738352247564988	0.999999999678234	Zfand2b	TRUE
OK	negbinomial.size	0.999999999678234	0.999999999678234	Abcb6	FALSE
OK	negbinomial.size	0.137937125377386	0.999999999678234	Atg9a	TRUE
OK	negbinomial.size	0.741234821864469	0.999999999678234	Ankzf1	FALSE
OK	negbinomial.size	0.220032315064655	0.999999999678234	Glb1l	FALSE
OK	negbinomial.size	0.394889084025216	0.999999999678234	Stk16	TRUE
OK	negbinomial.size	0.206830810647615	0.999999999678234	Tuba4a	TRUE
OK	negbinomial.size	0.999999999678234	0.999999999678234	A630095N17Rik	FALSE
OK	negbinomial.size	0.81102500744292	0.999999999678234	Dnajb2	FALSE
OK	negbinomial.size	0.999999999678234	0.999999999678234	Ptprn	FALSE
OK	negbinomial.size	0.999999999678234	0.999999999678234	Gm28294	FALSE
OK	negbinomial.size	0.999999999678234	0.999999999678234	Resp18	FALSE
OK	negbinomial.size	0.999999999678234	0.999999999678234	Gm28902	FALSE
OK	negbinomial.size	0.590719694684355	0.999999999678234	Dnpep	FALSE
OK	negbinomial.size	0.999999999678234	0.999999999678234	Des	FALSE
OK	negbinomial.size	0.999999999678234	0.999999999678234	Gm15179	FALSE
OK	negbinomial.size	0.999999999678234	0.999999999678234	Speg	FALSE
OK	negbinomial.size	0.999999999678234	0.999999999678234	Gm15178	FALSE
OK	negbinomial.size	0.309374736834639	0.999999999678234	Gmppa	FALSE
OK	negbinomial.size	0.999999999678234	0.999999999678234	Asic4	FALSE
OK	negbinomial.size	0.357750137302401	0.999999999678234	Chpf	FALSE
OK	negbinomial.size	0.999999999678234	0.999999999678234	Obsl1	FALSE
OK	negbinomial.size	0.999999999678234	0.999999999678234	Tmem198	FALSE
OK	negbinomial.size	0.999999999678234	0.999999999678234	Inha	FALSE
OK	negbinomial.size	0.529384321088498	0.999999999678234	Stk11ip	FALSE
OK	negbinomial.size	0.999999999678234	0.999999999678234	Slc4a3	FALSE
OK	negbinomial.size	0.999999999678234	0.999999999678234	Gm29065	FALSE
OK	negbinomial.size	0.999999999678234	0.999999999678234	Gm29069	FALSE
OK	negbinomial.size	0.999999999678234	0.999999999678234	Gm17751	FALSE
OK	negbinomial.size	0.999999999678234	0.999999999678234	Gm816	FALSE
OK	negbinomial.size	0.999999999678234	0.999999999678234	Epha4	FALSE
OK	negbinomial.size	0.999999999678234	0.999999999678234	Gm28386	FALSE
OK	negbinomial.size	0.999999999678234	0.999999999678234	Gm28387	FALSE
OK	negbinomial.size	0.999999999678234	0.999999999678234	Pax3	FALSE
OK	negbinomial.size	0.999999999678234	0.999999999678234	Sgpp2	FALSE
OK	negbinomial.size	0.999999999678234	0.999999999678234	Gm28410	FALSE
OK	negbinomial.size	0.999999999678234	0.999999999678234	Farsb	FALSE
OK	negbinomial.size	0.999999999678234	0.999999999678234	BC035947	FALSE
OK	negbinomial.size	0.999999999678234	0.999999999678234	Mogat1	FALSE
OK	negbinomial.size	0.999999999678234	0.999999999678234	5730419F03Rik	FALSE
OK	negbinomial.size	0.999999999678234	0.999999999678234	Gm29611	FALSE
OK	negbinomial.size	0.165574162911194	0.999999999678234	Acsl3	FALSE
OK	negbinomial.size	0.364138886436853	0.999999999678234	Utp14b	FALSE
OK	negbinomial.size	0.999999999678234	0.999999999678234	Gm29536	FALSE
OK	negbinomial.size	0.3293729415573	0.999999999678234	Kcne4	FALSE
OK	negbinomial.size	0.999999999678234	0.999999999678234	Gm29187	FALSE
OK	negbinomial.size	0.999999999678234	0.999999999678234	Scg2	FALSE
OK	negbinomial.size	0.445800480104883	0.999999999678234	Ap1s3	FALSE
OK	negbinomial.size	0.0151944169875505	0.465493637469684	Wdfy1	FALSE
OK	negbinomial.size	0.999999999109069	0.999999999678234	Mrpl44	FALSE
OK	negbinomial.size	0.659970586071052	0.999999999678234	Serpine2	FALSE
OK	negbinomial.size	0.999999999678234	0.999999999678234	9830004L10Rik	FALSE
OK	negbinomial.size	0.999999999678234	0.999999999678234	Fam124b	FALSE
OK	negbinomial.size	0.999999999678234	0.999999999678234	2310015K22Rik	FALSE
OK	negbinomial.size	0.686929701938312	0.999999999678234	Cul3	TRUE
OK	negbinomial.size	0.999999999678234	0.999999999678234	Gm29125	FALSE
OK	negbinomial.size	0.999999999678234	0.999999999678234	1700016L21Rik	FALSE
OK	negbinomial.size	0.999999999678234	0.999999999678234	Gm45261	FALSE
OK	negbinomial.size	0.511019290715236	0.999999999678234	Dock10	FALSE
OK	negbinomial.size	0.999999999678234	0.999999999678234	Nyap2	FALSE
OK	negbinomial.size	0.999999999678234	0.999999999678234	Irs1	FALSE
OK	negbinomial.size	0.999999999678234	0.999999999678234	Gm9747	FALSE
OK	negbinomial.size	0.171241322436676	0.999999999678234	Rhbdd1	FALSE
OK	negbinomial.size	0.999999999678234	0.999999999678234	Gm28940	FALSE
OK	negbinomial.size	0.999999999678234	0.999999999678234	Col4a4	FALSE
OK	negbinomial.size	0.999999999678234	0.999999999678234	Col4a3	FALSE
OK	negbinomial.size	0.999999999678234	0.999999999678234	C430014B12Rik	FALSE
OK	negbinomial.size	0.0275787756550828	0.683903869793177	Mff	TRUE
OK	negbinomial.size	0.999999999678234	0.999999999678234	Gm28941	FALSE
OK	negbinomial.size	0.999999999678234	0.999999999678234	Tm4sf20	FALSE
OK	negbinomial.size	0.999999999678234	0.999999999678234	Gm47791	FALSE
OK	negbinomial.size	0.999999999678234	0.999999999678234	Gm28942	FALSE
OK	negbinomial.size	0.835809808305757	0.999999999678234	Agfg1	TRUE
OK	negbinomial.size	0.190342605080059	0.999999999678234	A030005L19Rik	FALSE
OK	negbinomial.size	0.999999999678234	0.999999999678234	A030014E15Rik	FALSE
OK	negbinomial.size	0.999999999678234	0.999999999678234	Gm6217	FALSE
OK	negbinomial.size	0.999999999678234	0.999999999678234	A030003K21Rik	FALSE
OK	negbinomial.size	0.999999999678234	0.999999999678234	Gm7544	FALSE
OK	negbinomial.size	0.999999999678234	0.999999999678234	Gm47955	FALSE
OK	negbinomial.size	0.999999999678234	0.999999999678234	Gm47959	FALSE
OK	negbinomial.size	0.999999999678234	0.999999999678234	Slc19a3	FALSE
OK	negbinomial.size	0.999999999678234	0.999999999678234	Krtap28-10	FALSE
OK	negbinomial.size	0.999999999678234	0.999999999678234	Gm47969	FALSE
OK	negbinomial.size	0.999999999678234	0.999999999678234	A030005K14Rik	FALSE
OK	negbinomial.size	0.999999999678234	0.999999999678234	Krtap28-13	FALSE
OK	negbinomial.size	0.999999999678234	0.999999999678234	Ccl20	FALSE
OK	negbinomial.size	0.999999999678234	0.999999999678234	Daw1	FALSE
OK	negbinomial.size	0.999999999678234	0.999999999678234	Sphkap	FALSE
OK	negbinomial.size	0.999999999678234	0.999999999678234	4933436I20Rik	FALSE
OK	negbinomial.size	0.153731476406451	0.999999999678234	Pid1	FALSE
OK	negbinomial.size	0.999999999678234	0.999999999678234	Dner	FALSE
OK	negbinomial.size	0.0301075321612009	0.710700859837426	Trip12	TRUE
OK	negbinomial.size	0.999999999442684	0.999999999678234	Fbxo36	FALSE
OK	negbinomial.size	0.357750137302412	0.999999999678234	Slc16a14	FALSE
OK	negbinomial.size	5.4098103746794e-06	0.000714915309555481	C130026I21Rik	TRUE
OK	negbinomial.size	0.927282902013546	0.999999999678234	A530032D15Rik	TRUE
OK	negbinomial.size	0.999999999678234	0.999999999678234	Gm10553	FALSE
OK	negbinomial.size	0.999999999442684	0.999999999678234	A530040E14Rik	FALSE
OK	negbinomial.size	0.999999999678234	0.999999999678234	Gm16028	FALSE
OK	negbinomial.size	0.999999999678234	0.999999999678234	Gm16025	FALSE
OK	negbinomial.size	0.999999999678234	0.999999999678234	Gm16092	FALSE
OK	negbinomial.size	0.999999999678234	0.999999999678234	G530012D18Rik	FALSE
OK	negbinomial.size	0.881447179841152	0.999999999678234	Sp110	TRUE
OK	negbinomial.size	0.999999999678234	0.999999999678234	Gm16094	FALSE
OK	negbinomial.size	0.090793816053244	0.999999999678234	Sp140	TRUE
OK	negbinomial.size	0.999999999678234	0.999999999678234	Gm10552	FALSE
OK	negbinomial.size	0.999999999678234	0.999999999678234	Gm17017	FALSE
OK	negbinomial.size	0.00922322837763411	0.335290867008807	Sp100	TRUE
OK	negbinomial.size	0.086431956271728	0.999999999678234	A630001G21Rik	FALSE
OK	negbinomial.size	0.999999999678234	0.999999999678234	9930111H07Rik	FALSE
OK	negbinomial.size	0.226550363374977	0.999999999678234	Cab39	TRUE
OK	negbinomial.size	0.258813495774515	0.999999999678234	Itm2c	FALSE
OK	negbinomial.size	0.999999999678234	0.999999999678234	4933407L21Rik	FALSE
OK	negbinomial.size	0.999999999678234	0.999999999678234	Gm28884	FALSE
OK	negbinomial.size	0.999999999678234	0.999999999678234	Gpr55	FALSE
OK	negbinomial.size	0.999999999678234	0.999999999678234	Gm28100	FALSE
OK	negbinomial.size	0.999999999678234	0.999999999678234	Spata3	FALSE
OK	negbinomial.size	0.999999999678234	0.999999999678234	2810459M11Rik	FALSE
OK	negbinomial.size	0.0887082359497299	0.999999999678234	Psmd1	FALSE
OK	negbinomial.size	0.999999999678234	0.999999999678234	Htr2b	FALSE
OK	negbinomial.size	0.999999999678234	0.999999999678234	Armc9	FALSE
OK	negbinomial.size	0.999999999678234	0.999999999678234	Gm16341	FALSE
OK	negbinomial.size	0.999999999678234	0.999999999678234	B3gnt7	FALSE
OK	negbinomial.size	0.999999999678234	0.999999999678234	Gm28626	FALSE
OK	negbinomial.size	0.061727692235079	0.999999999678234	Ncl	TRUE
OK	negbinomial.size	0.999999999678234	0.999999999678234	C130036L24Rik	FALSE
OK	negbinomial.size	0.999999999678234	0.999999999678234	Nmur1	FALSE
OK	negbinomial.size	0.999999999678234	0.999999999678234	Tex44	FALSE
OK	negbinomial.size	0.00798513198752883	0.303991240776703	Ptma	TRUE
OK	negbinomial.size	0.0265457725247261	0.66612329576642	Pde6d	FALSE
OK	negbinomial.size	0.309374736834651	0.999999999678234	Cops7b	FALSE
OK	negbinomial.size	0.999999999678234	0.999999999678234	Nppc	FALSE
OK	negbinomial.size	0.35775013730242	0.999999999678234	Dis3l2	FALSE
OK	negbinomial.size	0.999999999678234	0.999999999678234	Gm29055	FALSE
OK	negbinomial.size	0.999999999678234	0.999999999678234	Gm28375	FALSE
OK	negbinomial.size	0.999999999678234	0.999999999678234	Gm29371	FALSE
OK	negbinomial.size	0.999999999678234	0.999999999678234	Alppl2	FALSE
OK	negbinomial.size	0.999999999678234	0.999999999678234	Alpi	FALSE
OK	negbinomial.size	0.999999999678234	0.999999999678234	Akp3	FALSE
OK	negbinomial.size	0.999999999678234	0.999999999678234	Gm29374	FALSE
OK	negbinomial.size	0.999999999678234	0.999999999678234	Ecel1	FALSE
OK	negbinomial.size	0.999999999678234	0.999999999678234	Prss56	FALSE
OK	negbinomial.size	0.999999999678234	0.999999999678234	Chrnd	FALSE
OK	negbinomial.size	0.999999999678234	0.999999999678234	Chrng	FALSE
OK	negbinomial.size	0.467858059849562	0.999999999678234	Eif4e2	TRUE
OK	negbinomial.size	0.999999999678234	0.999999999678234	Efhd1	FALSE
OK	negbinomial.size	0.999999999678234	0.999999999678234	Efhd1os	FALSE
OK	negbinomial.size	0.243496859769121	0.999999999678234	Gigyf2	FALSE
OK	negbinomial.size	0.999999999442684	0.999999999678234	Kcnj13	FALSE
OK	negbinomial.size	0.999999999678234	0.999999999678234	Snorc	FALSE
OK	negbinomial.size	0.999999999678234	0.999999999678234	Ngef	FALSE
OK	negbinomial.size	0.999999999678234	0.999999999678234	Neu2	FALSE
OK	negbinomial.size	0.0963680427980607	0.999999999678234	Inpp5d	TRUE
OK	negbinomial.size	0.132447689253022	0.999999999678234	Atg16l1	FALSE
OK	negbinomial.size	0.999999999678234	0.999999999678234	Sag	FALSE
OK	negbinomial.size	0.188726336775545	0.999999999678234	Dgkd	FALSE
OK	negbinomial.size	0.999999999678234	0.999999999678234	Gm19582	FALSE
OK	negbinomial.size	0.357750137302409	0.999999999678234	Usp40	FALSE
OK	negbinomial.size	0.999999999678234	0.999999999678234	Ugt1a10	FALSE
OK	negbinomial.size	0.999999999678234	0.999999999678234	Gm20528	FALSE
OK	negbinomial.size	0.999999999678234	0.999999999678234	Ugt1a9	FALSE
OK	negbinomial.size	0.999999999678234	0.999999999678234	Ugt1a8	FALSE
OK	negbinomial.size	0.999999999442684	0.999999999678234	Ugt1a7c	FALSE
OK	negbinomial.size	0.999999999678234	0.999999999678234	Ugt1a6b	FALSE
OK	negbinomial.size	0.329372941557305	0.999999999678234	Ugt1a6a	FALSE
OK	negbinomial.size	0.999999999678234	0.999999999678234	Ugt1a5	FALSE
OK	negbinomial.size	0.999999999678234	0.999999999678234	Ugt1a2	FALSE
OK	negbinomial.size	0.999999999678234	0.999999999678234	Dnajb3	FALSE
OK	negbinomial.size	0.999999999678234	0.999999999678234	Ugt1a1	FALSE
OK	negbinomial.size	0.999999999678234	0.999999999678234	Mroh2a	FALSE
OK	negbinomial.size	0.6329628035375	0.999999999678234	Hjurp	FALSE
OK	negbinomial.size	0.999999999678234	0.999999999678234	Trpm8	FALSE
OK	negbinomial.size	0.999999999678234	0.999999999678234	4930453O03Rik	FALSE
OK	negbinomial.size	0.999999999678234	0.999999999678234	Spp2	FALSE
OK	negbinomial.size	0.999999999678234	0.999999999678234	Gm29538	FALSE
OK	negbinomial.size	0.999999999678234	0.999999999678234	Gm28888	FALSE
OK	negbinomial.size	0.999999999678234	0.999999999678234	Glrp1	FALSE
OK	negbinomial.size	0.999999999678234	0.999999999678234	Gm19589	FALSE
OK	negbinomial.size	0.999999999678234	0.999999999678234	Gm29336	FALSE
OK	negbinomial.size	0.00447817034919006	0.196728341838738	Arl4c	TRUE
OK	negbinomial.size	0.999999999678234	0.999999999678234	Platr5	FALSE
OK	negbinomial.size	0.999999999678234	0.999999999678234	Gm29337	FALSE
OK	negbinomial.size	0.999999999678234	0.999999999678234	1700067G17Rik	FALSE
OK	negbinomial.size	0.999999999678234	0.999999999678234	Sh3bp4	FALSE
OK	negbinomial.size	0.999999999678234	0.999999999678234	Gm28342	FALSE
OK	negbinomial.size	0.999999999678234	0.999999999678234	C030007H22Rik	FALSE
OK	negbinomial.size	0.77692739121088	0.999999999678234	Agap1	TRUE
OK	negbinomial.size	0.0522509123615601	0.971200504098994	Gm28499	FALSE
OK	negbinomial.size	0.999999999678234	0.999999999678234	4933400F21Rik	FALSE
OK	negbinomial.size	0.999999999678234	0.999999999678234	Gbx2	FALSE
OK	negbinomial.size	0.999999999678234	0.999999999678234	D130058E05Rik	FALSE
OK	negbinomial.size	0.999999999678234	0.999999999678234	Asb18	FALSE
OK	negbinomial.size	0.999999999678234	0.999999999678234	Iqca	FALSE
OK	negbinomial.size	0.999999999678234	0.999999999678234	4930434B07Rik	FALSE
OK	negbinomial.size	0.999999999678234	0.999999999678234	Ackr3	FALSE
OK	negbinomial.size	0.999999999678234	0.999999999678234	Gm28721	FALSE
OK	negbinomial.size	0.999999999678234	0.999999999678234	Gm28723	FALSE
OK	negbinomial.size	0.999999999678234	0.999999999678234	Gm28722	FALSE
OK	negbinomial.size	0.637044715848609	0.999999999678234	Cops8	FALSE
OK	negbinomial.size	0.999999999678234	0.999999999678234	Gm9991	FALSE
OK	negbinomial.size	0.00434227828926419	0.192595272953678	Col6a3	FALSE
OK	negbinomial.size	0.268559528626974	0.999999999678234	Mlph	FALSE
OK	negbinomial.size	0.999999999678234	0.999999999678234	Prlh	FALSE
OK	negbinomial.size	0.999999999678234	0.999999999678234	Rab17	FALSE
OK	negbinomial.size	0.999999999678234	0.999999999678234	Gm28199	FALSE
OK	negbinomial.size	0.0322041312328097	0.736992343223527	Lrrfip1	TRUE
OK	negbinomial.size	0.999999999678234	0.999999999678234	Rbm44	FALSE
OK	negbinomial.size	0.312897690883992	0.999999999678234	Ramp1	FALSE
OK	negbinomial.size	0.484692461493375	0.999999999678234	Ube2f	FALSE
OK	negbinomial.size	0.999999999442684	0.999999999678234	Scly	FALSE
OK	negbinomial.size	0.999999999678234	0.999999999678234	Gm17090	FALSE
OK	negbinomial.size	0.999999999678234	0.999999999678234	Espnl	FALSE
OK	negbinomial.size	0.999999999678234	0.999999999678234	Klhl30	FALSE
OK	negbinomial.size	0.999999999678234	0.999999999678234	Erfe	FALSE
OK	negbinomial.size	0.0127642456812506	0.413651358785856	Ilkap	TRUE
OK	negbinomial.size	0.999999999678234	0.999999999678234	1700020N18Rik	FALSE
OK	negbinomial.size	0.485167114325369	0.999999999678234	Hes6	FALSE
OK	negbinomial.size	0.0152445699264267	0.465493637469684	Per2	FALSE
OK	negbinomial.size	0.999999999678234	0.999999999678234	Gm28382	FALSE
OK	negbinomial.size	0.357750137302418	0.999999999678234	Traf3ip1	FALSE
OK	negbinomial.size	0.180331983751534	0.999999999678234	Asb1	FALSE
OK	negbinomial.size	0.999999999678234	0.999999999678234	Gm28380	FALSE
OK	negbinomial.size	0.999999999678234	0.999999999678234	Gm29100	FALSE
OK	negbinomial.size	0.999999999678234	0.999999999678234	Twist2	FALSE
OK	negbinomial.size	0.999999999678234	0.999999999678234	Gm29101	FALSE
OK	negbinomial.size	0.00164632279818118	0.0921626365058195	Hdac4	TRUE
OK	negbinomial.size	0.999999999678234	0.999999999678234	Gm29099	FALSE
OK	negbinomial.size	0.989612827229198	0.999999999678234	Ndufa10	FALSE
OK	negbinomial.size	0.999999999678234	0.999999999678234	Olfr1416	FALSE
OK	negbinomial.size	0.999999999678234	0.999999999678234	Olfr1415	FALSE
OK	negbinomial.size	0.999999999678234	0.999999999678234	Olfr1414	FALSE
OK	negbinomial.size	0.999999999678234	0.999999999678234	Olfr1413	FALSE
OK	negbinomial.size	0.999999999678234	0.999999999678234	1700054K02Rik	FALSE
OK	negbinomial.size	0.999999999678234	0.999999999678234	Olfr1412	FALSE
OK	negbinomial.size	0.999999999678234	0.999999999678234	Olfr1411	FALSE
OK	negbinomial.size	0.999999999678234	0.999999999678234	Olfr1410	FALSE
OK	negbinomial.size	0.999999999678234	0.999999999678234	Olfr12	FALSE
OK	negbinomial.size	0.0023607038589358	0.123372602806134	Cops9	TRUE
OK	negbinomial.size	0.999999999678234	0.999999999678234	Otos	FALSE
OK	negbinomial.size	0.999999999678234	0.999999999678234	Gm29483	FALSE
OK	negbinomial.size	0.999999999678234	0.999999999678234	Gm29482	FALSE
OK	negbinomial.size	0.999999999678234	0.999999999678234	Gm29481	FALSE
OK	negbinomial.size	0.014909575843148	0.460938900347374	Gpc1	FALSE
OK	negbinomial.size	0.999999999678234	0.999999999678234	Gm29480	FALSE
OK	negbinomial.size	0.357750137302411	0.999999999678234	Ankmy1	FALSE
OK	negbinomial.size	0.999999999678234	0.999999999678234	Dusp28	FALSE
OK	negbinomial.size	0.32937294155729	0.999999999678234	5033417F24Rik	FALSE
OK	negbinomial.size	0.340297314477073	0.999999999678234	Rnpepl1	FALSE
OK	negbinomial.size	0.535192495969943	0.999999999678234	9430060I03Rik	FALSE
OK	negbinomial.size	0.520309601717405	0.999999999678234	Capn10	FALSE
OK	negbinomial.size	3.40715320227267e-11	1.14441307299252e-08	Gpr35	TRUE
OK	negbinomial.size	0.999999999678234	0.999999999678234	Aqp12	FALSE
OK	negbinomial.size	0.999999999678234	0.999999999678234	Kif1a	FALSE
OK	negbinomial.size	0.999999999678234	0.999999999678234	Gm28086	FALSE
OK	negbinomial.size	0.999999999678234	0.999999999678234	Agxt	FALSE
OK	negbinomial.size	0.999999999678234	0.999999999678234	Mab21l4	FALSE
OK	negbinomial.size	0.999999999678234	0.999999999678234	Crocc2	FALSE
OK	negbinomial.size	0.49854876804181	0.999999999678234	Sned1	FALSE
OK	negbinomial.size	0.165574162911195	0.999999999678234	Mterf4	FALSE
OK	negbinomial.size	0.999999999678234	0.999999999678234	Gm28535	FALSE
OK	negbinomial.size	0.999999999678234	0.999999999678234	Pask	FALSE
OK	negbinomial.size	0.161548428453346	0.999999999678234	Ppp1r7	FALSE
OK	negbinomial.size	0.999999999678234	0.999999999678234	Ano7	FALSE
OK	negbinomial.size	0.543948153681548	0.999999999678234	Hdlbp	TRUE
OK	negbinomial.size	0.999999999442684	0.999999999678234	Sept2	FALSE
OK	negbinomial.size	0.357750137302401	0.999999999678234	Farp2	FALSE
OK	negbinomial.size	0.150911478599625	0.999999999678234	Stk25	FALSE
OK	negbinomial.size	0.999999999678234	0.999999999678234	Gm28536	FALSE
OK	negbinomial.size	0.999999999678234	0.999999999678234	Bok	FALSE
OK	negbinomial.size	0.0160768968894776	0.475885841338506	Thap4	FALSE
OK	negbinomial.size	0.999999999678234	0.999999999678234	Gm10550	FALSE
OK	negbinomial.size	0.44449412216441	0.999999999678234	Atg4b	FALSE
OK	negbinomial.size	0.0917114518045964	0.999999999678234	Dtymk	FALSE
OK	negbinomial.size	0.212860141903268	0.999999999678234	Ing5	FALSE
OK	negbinomial.size	0.999999999109069	0.999999999678234	D2hgdh	FALSE
OK	negbinomial.size	0.999999999678234	0.999999999678234	Gal3st2	FALSE
OK	negbinomial.size	0.999999999678234	0.999999999678234	Gal3st2b	FALSE
OK	negbinomial.size	0.999999999678234	0.999999999678234	Gal3st2c	FALSE
OK	negbinomial.size	0.999999999678234	0.999999999678234	Neu4	FALSE
OK	negbinomial.size	0.999999999678234	0.999999999678234	Pdcd1	FALSE
OK	negbinomial.size	0.999999999678234	0.999999999678234	4930440C22Rik	FALSE
OK	negbinomial.size	0.00130477272818077	0.0770556714655476	Fam174a	TRUE
OK	negbinomial.size	0.000289405585167006	0.0221934555871339	St8sia4	TRUE
OK	negbinomial.size	0.999999999678234	0.999999999678234	4930598F16Rik	FALSE
OK	negbinomial.size	0.999999999678234	0.999999999678234	1700063A18Rik	FALSE
OK	negbinomial.size	0.999999999678234	0.999999999678234	Gm29601	FALSE
OK	negbinomial.size	0.999999999678234	0.999999999678234	4930533P14Rik	FALSE
OK	negbinomial.size	0.360299855073911	0.999999999678234	Slco4c1	TRUE
OK	negbinomial.size	0.0438067234158862	0.885609903790126	Panct2	FALSE
OK	negbinomial.size	0.999999999678234	0.999999999678234	Gm28901	FALSE
OK	negbinomial.size	0.999999999678234	0.999999999678234	Slco6c1	FALSE
OK	negbinomial.size	0.517128799949705	0.999999999678234	D1Ertd622e	TRUE
OK	negbinomial.size	0.237837384395065	0.999999999678234	Ppip5k2	FALSE
OK	negbinomial.size	0.329372941557296	0.999999999678234	Gin1	FALSE
OK	negbinomial.size	0.720958512054791	0.999999999678234	Pam	TRUE
OK	negbinomial.size	0.811028458871884	0.999999999678234	B230216N24Rik	FALSE
OK	negbinomial.size	0.999999999678234	0.999999999678234	1810006J02Rik	FALSE
OK	negbinomial.size	0.999999999678234	0.999999999678234	Gm29461	FALSE
OK	negbinomial.size	0.999999999678234	0.999999999678234	Slco6d1	FALSE
OK	negbinomial.size	0.999999999678234	0.999999999678234	Gm7967	FALSE
OK	negbinomial.size	0.999999999678234	0.999999999678234	Cntnap5b	FALSE
OK	negbinomial.size	0.999999999678234	0.999999999678234	Gm20268	FALSE
OK	negbinomial.size	0.999999999678234	0.999999999678234	Gm28187	FALSE
OK	negbinomial.size	0.999999999678234	0.999999999678234	Cdh20	FALSE
OK	negbinomial.size	0.999999999678234	0.999999999678234	Gm15699	FALSE
OK	negbinomial.size	0.999999999678234	0.999999999678234	Gm29012	FALSE
OK	negbinomial.size	0.999999999678234	0.999999999678234	Rnf152	FALSE
OK	negbinomial.size	0.999999999678234	0.999999999678234	Gm17634	FALSE
OK	negbinomial.size	0.999999999678234	0.999999999678234	Gm28403	FALSE
OK	negbinomial.size	0.0558706746762754	0.99864382181283	Pign	FALSE
OK	negbinomial.size	0.999999999678234	0.999999999678234	Gm28404	FALSE
OK	negbinomial.size	0.130265340213102	0.999999999678234	Relch	FALSE
OK	negbinomial.size	0.999999999678234	0.999999999678234	Tnfrsf11a	FALSE
OK	negbinomial.size	0.22618544476736	0.999999999678234	Gm7160	FALSE
OK	negbinomial.size	0.136817326816048	0.999999999678234	Zcchc2	TRUE
OK	negbinomial.size	0.999999999678234	0.999999999678234	Gm20753	FALSE
OK	negbinomial.size	0.00437949693623753	0.193447779053396	Phlpp1	FALSE
OK	negbinomial.size	0.999999999678234	0.999999999678234	A530053M12Rik	FALSE
OK	negbinomial.size	0.0846478170766801	0.999999999678234	Bcl2	FALSE
OK	negbinomial.size	0.999999999678234	0.999999999678234	D630008O14Rik	FALSE
OK	negbinomial.size	0.0958559394766933	0.999999999678234	Kdsr	FALSE
OK	negbinomial.size	0.55031880033772	0.999999999678234	Vps4b	TRUE
OK	negbinomial.size	0.999999999678234	0.999999999678234	Serpinb5	FALSE
OK	negbinomial.size	0.999999999678234	0.999999999678234	Serpinb12	FALSE
OK	negbinomial.size	0.999999999678234	0.999999999678234	Serpinb13	FALSE
OK	negbinomial.size	0.999999999678234	0.999999999678234	Serpinb3a	FALSE
OK	negbinomial.size	0.999999999678234	0.999999999678234	Serpinb3d	FALSE
OK	negbinomial.size	0.999999999678234	0.999999999678234	Serpinb3b	FALSE
OK	negbinomial.size	0.999999999678234	0.999999999678234	Serpinb3c	FALSE
OK	negbinomial.size	0.999999999678234	0.999999999678234	Serpinb11	FALSE
OK	negbinomial.size	0.999999999678234	0.999999999678234	Gm15391	FALSE
OK	negbinomial.size	0.999999999678234	0.999999999678234	Serpinb7	FALSE
OK	negbinomial.size	0.34582519733254	0.999999999678234	Serpinb2	FALSE
OK	negbinomial.size	0.999999999678234	0.999999999678234	Serpinb8	FALSE
OK	negbinomial.size	0.999999999678234	0.999999999678234	Gm15389	FALSE
OK	negbinomial.size	0.999999999678234	0.999999999678234	D830032E09Rik	FALSE
OK	negbinomial.size	0.999999999678234	0.999999999678234	Cdh7	FALSE
OK	negbinomial.size	0.999999999678234	0.999999999678234	Cdh19	FALSE
OK	negbinomial.size	0.999999999678234	0.999999999678234	Gm29088	FALSE
OK	negbinomial.size	0.999999999678234	0.999999999678234	Dsel	FALSE
OK	negbinomial.size	0.999999999678234	0.999999999678234	Gm28189	FALSE
OK	negbinomial.size	0.999999999678234	0.999999999678234	9330185C12Rik	FALSE
OK	negbinomial.size	0.999999999678234	0.999999999678234	Cntnap5a	FALSE
OK	negbinomial.size	0.999999999678234	0.999999999678234	Gm19965	FALSE
OK	negbinomial.size	0.999999999678234	0.999999999678234	Zfp813-ps	FALSE
OK	negbinomial.size	0.999999999678234	0.999999999678234	Gm28363	FALSE
OK	negbinomial.size	0.999999999678234	0.999999999678234	B020011L13Rik	FALSE
OK	negbinomial.size	0.999999999678234	0.999999999678234	Gm28360	FALSE
OK	negbinomial.size	0.999999999678234	0.999999999678234	Gm28168	FALSE
OK	negbinomial.size	0.999999999678234	0.999999999678234	Gm7145	FALSE
OK	negbinomial.size	0.999999999678234	0.999999999678234	Gm29106	FALSE
OK	negbinomial.size	0.00043746341169588	0.0310022147475465	Tsn	FALSE
OK	negbinomial.size	0.357750137302403	0.999999999678234	Nifk	FALSE
OK	negbinomial.size	0.999999999678234	0.999999999678234	Gm28867	FALSE
OK	negbinomial.size	0.36232037994289	0.999999999678234	Clasp1	TRUE
OK	negbinomial.size	0.00585473612706504	0.241414279305898	2900060B14Rik	FALSE
OK	negbinomial.size	0.999999999678234	0.999999999678234	Tfcp2l1	FALSE
OK	negbinomial.size	0.999999999678234	0.999999999678234	Gli2	FALSE
OK	negbinomial.size	0.999999999678234	0.999999999678234	Gm26831	FALSE
OK	negbinomial.size	0.999999999678234	0.999999999678234	Gm29456	FALSE
OK	negbinomial.size	0.999999999678234	0.999999999678234	Gm29455	FALSE
OK	negbinomial.size	0.999999999678234	0.999999999678234	Inhbb	FALSE
OK	negbinomial.size	0.355928691931651	0.999999999678234	Ralb	TRUE
OK	negbinomial.size	0.999999999678234	0.999999999678234	Gm27184	FALSE
OK	negbinomial.size	0.250793268039265	0.999999999678234	Tmem185b	FALSE
OK	negbinomial.size	0.999999999678234	0.999999999678234	3830432H09Rik	FALSE
OK	negbinomial.size	0.999999999678234	0.999999999678234	Epb41l5	FALSE
OK	negbinomial.size	0.999999999442684	0.999999999678234	Ptpn4	FALSE
OK	negbinomial.size	0.999999999678234	0.999999999678234	Gm28209	FALSE
OK	negbinomial.size	0.999999999678234	0.999999999678234	Tmem177	FALSE
OK	negbinomial.size	0.999999999678234	0.999999999678234	Cfap221	FALSE
OK	negbinomial.size	0.999999999678234	0.999999999678234	Sctr	FALSE
OK	negbinomial.size	0.999999999678234	0.999999999678234	Tmem37	FALSE
OK	negbinomial.size	0.203780417143938	0.999999999678234	Dbi	TRUE
OK	negbinomial.size	0.999999999678234	0.999999999678234	3110009E18Rik	FALSE
OK	negbinomial.size	0.999999999678234	0.999999999678234	Steap3	FALSE
OK	negbinomial.size	0.999999999678234	0.999999999678234	C1ql2	FALSE
OK	negbinomial.size	0.999999999678234	0.999999999678234	1700012E03Rik	FALSE
OK	negbinomial.size	0.999999999678234	0.999999999678234	Marco	FALSE
OK	negbinomial.size	0.999999999678234	0.999999999678234	En1	FALSE
OK	negbinomial.size	0.999999999678234	0.999999999678234	2610027F03Rik	FALSE
OK	negbinomial.size	0.999999999678234	0.999999999678234	Gm29346	FALSE
OK	negbinomial.size	0.999999999678234	0.999999999678234	Gm29345	FALSE
OK	negbinomial.size	0.999999999678234	0.999999999678234	Gm29348	FALSE
OK	negbinomial.size	0.999999999678234	0.999999999678234	Gm29347	FALSE
OK	negbinomial.size	0.999999999678234	0.999999999678234	Celrr	FALSE
OK	negbinomial.size	0.999999999678234	0.999999999678234	Gm29359	FALSE
OK	negbinomial.size	0.0189236207320457	0.531989669141079	Insig2	FALSE
OK	negbinomial.size	0.999999999678234	0.999999999678234	2210011K15Rik	FALSE
OK	negbinomial.size	0.0958559394766936	0.999999999678234	Ccdc93	FALSE
OK	negbinomial.size	0.999999999678234	0.999999999678234	Gm15392	FALSE
OK	negbinomial.size	0.999999999678234	0.999999999678234	Htr5b	FALSE
OK	negbinomial.size	0.268559528626977	0.999999999678234	Ddx18	FALSE
OK	negbinomial.size	0.999999999678234	0.999999999678234	Gm28590	FALSE
OK	negbinomial.size	0.999999999678234	0.999999999678234	Dpp10	FALSE
OK	negbinomial.size	0.999999999678234	0.999999999678234	1700121L03Rik	FALSE
OK	negbinomial.size	0.0554534685294727	0.99864382181283	Actr3	TRUE
OK	negbinomial.size	0.999999999678234	0.999999999678234	Gm28706	FALSE
OK	negbinomial.size	0.990341236438478	0.999999999678234	Slc35f5	FALSE
OK	negbinomial.size	0.999999999678234	0.999999999678234	Gpr39	FALSE
OK	negbinomial.size	0.999999999678234	0.999999999678234	Lypd1	FALSE
OK	negbinomial.size	0.999999999678234	0.999999999678234	Nckap5	FALSE
OK	negbinomial.size	0.999999999678234	0.999999999678234	4930599A14Rik	FALSE
OK	negbinomial.size	0.345825167881673	0.999999999678234	Mgat5	FALSE
OK	negbinomial.size	0.268559528626976	0.999999999678234	Tmem163	FALSE
OK	negbinomial.size	0.999999999678234	0.999999999678234	Acmsd	FALSE
OK	negbinomial.size	0.999999999678234	0.999999999678234	2900009J06Rik	FALSE
OK	negbinomial.size	0.348105714188773	0.999999999678234	Ccnt2	FALSE
OK	negbinomial.size	0.999999999678234	0.999999999678234	Map3k19	FALSE
OK	negbinomial.size	0.543862470160187	0.999999999678234	Rab3gap1	FALSE
OK	negbinomial.size	0.999999999678234	0.999999999678234	Zranb3	FALSE
OK	negbinomial.size	0.999999999678234	0.999999999678234	Gm28800	FALSE
OK	negbinomial.size	0.0876172414011227	0.999999999678234	R3hdm1	FALSE
OK	negbinomial.size	0.77495349589354	0.999999999678234	Ubxn4	TRUE
OK	negbinomial.size	0.999999999678234	0.999999999678234	Lct	FALSE
OK	negbinomial.size	0.149705645072382	0.999999999678234	Mcm6	FALSE
OK	negbinomial.size	0.0558706746762746	0.99864382181283	Dars	FALSE
OK	negbinomial.size	6.88539524832215e-06	0.000877547706648805	Cxcr4	TRUE
OK	negbinomial.size	0.999999999678234	0.999999999678234	Gm26686	FALSE
OK	negbinomial.size	0.999999999678234	0.999999999678234	Thsd7b	FALSE
OK	negbinomial.size	0.999999999678234	0.999999999678234	Gm16081	FALSE
OK	negbinomial.size	0.999999999678234	0.999999999678234	Cd55b	FALSE
OK	negbinomial.size	0.999999999678234	0.999999999678234	Gm15674	FALSE
OK	negbinomial.size	0.220032315064655	0.999999999678234	Gm15675	FALSE
OK	negbinomial.size	0.000618648896019524	0.041732915590271	Cd55	FALSE
OK	negbinomial.size	0.999999999678234	0.999999999678234	Gm16083	FALSE
OK	negbinomial.size	0.999999999678234	0.999999999678234	Zp3r	FALSE
OK	negbinomial.size	0.999999999678234	0.999999999678234	C4bp	FALSE
OK	negbinomial.size	0.87259167052844	0.999999999678234	Pfkfb2	FALSE
OK	negbinomial.size	0.165574162911187	0.999999999678234	Yod1	FALSE
OK	negbinomial.size	0.999999999678234	0.999999999678234	AA986860	FALSE
OK	negbinomial.size	0.999999999678234	0.999999999678234	Gm28857	FALSE
OK	negbinomial.size	0.999999999678234	0.999999999678234	Gm28856	FALSE
OK	negbinomial.size	0.999999999678234	0.999999999678234	Fcamr	FALSE
OK	negbinomial.size	0.999999999678234	0.999999999678234	Gm15848	FALSE
OK	negbinomial.size	0.999999999678234	0.999999999678234	Pigr	FALSE
OK	negbinomial.size	0.872591670528414	0.999999999678234	Fcmr	FALSE
OK	negbinomial.size	0.999999999678234	0.999999999678234	Il24	FALSE
OK	negbinomial.size	0.999999999678234	0.999999999678234	Il20	FALSE
OK	negbinomial.size	0.999999999678234	0.999999999678234	Il19	FALSE
OK	negbinomial.size	0.999999999678234	0.999999999678234	Il10	FALSE
OK	negbinomial.size	0.678603159851933	0.999999999678234	Mapkapk2	TRUE
OK	negbinomial.size	0.999999999678234	0.999999999678234	Dyrk3	FALSE
OK	negbinomial.size	0.153731476406452	0.999999999678234	Eif2d	FALSE
OK	negbinomial.size	0.274422423888948	0.999999999678234	Rassf5	TRUE
OK	negbinomial.size	0.309374736834641	0.999999999678234	Ikbke	FALSE
OK	negbinomial.size	0.999999999678234	0.999999999678234	Gm28914	FALSE
OK	negbinomial.size	0.999999999678234	0.999999999678234	Gm28913	FALSE
OK	negbinomial.size	0.341369900529168	0.999999999678234	Srgap2	FALSE
OK	negbinomial.size	0.999999999678234	0.999999999678234	Gm29488	FALSE
OK	negbinomial.size	0.999999999678234	0.999999999678234	Fam72a	FALSE
OK	negbinomial.size	0.999999999678234	0.999999999678234	Avpr1b	FALSE
OK	negbinomial.size	0.0204137818971014	0.559824045551271	Ctse	TRUE
OK	negbinomial.size	0.999999999678234	0.999999999678234	Rab7b	FALSE
OK	negbinomial.size	0.999999999678234	0.999999999678234	Slc26a9	FALSE
OK	negbinomial.size	0.999999999678234	0.999999999678234	Pm20d1	FALSE
OK	negbinomial.size	0.114433424822953	0.999999999678234	Slc41a1	FALSE
OK	negbinomial.size	0.0958559394766947	0.999999999678234	Rab29	FALSE
OK	negbinomial.size	0.0359999749764234	0.790754264262958	Nucks1	FALSE
OK	negbinomial.size	0.999999999678234	0.999999999678234	Slc45a3	FALSE
OK	negbinomial.size	0.260467937629645	0.999999999678234	Elk4	TRUE
OK	negbinomial.size	0.490780804741256	0.999999999678234	Mfsd4a	FALSE
OK	negbinomial.size	0.329372941557299	0.999999999678234	Cdk18	FALSE
OK	negbinomial.size	0.999999999678234	0.999999999678234	Gm29629	FALSE
OK	negbinomial.size	0.999999999678234	0.999999999678234	Lemd1	FALSE
OK	negbinomial.size	0.999999999678234	0.999999999678234	Gm29695	FALSE
OK	negbinomial.size	0.999999999678234	0.999999999678234	Gm10188	FALSE
OK	negbinomial.size	0.999999999678234	0.999999999678234	Gm29630	FALSE
OK	negbinomial.size	0.999999999678234	0.999999999678234	Klhdc8a	FALSE
OK	negbinomial.size	5.17959785934305e-05	0.00518683642778002	Nuak2	TRUE
OK	negbinomial.size	0.999999999678234	0.999999999678234	F730311O21Rik	FALSE
OK	negbinomial.size	0.999999999678234	0.999999999678234	Tmcc2	FALSE
OK	negbinomial.size	0.999999999678234	0.999999999678234	Gm15849	FALSE
OK	negbinomial.size	0.204457609522138	0.999999999678234	Dstyk	FALSE
OK	negbinomial.size	0.999999999678234	0.999999999678234	6030442K20Rik	FALSE
OK	negbinomial.size	0.999999999678234	0.999999999678234	Rbbp5	FALSE
OK	negbinomial.size	0.999999999678234	0.999999999678234	Tmem81	FALSE
OK	negbinomial.size	0.999999999678234	0.999999999678234	Cntn2	FALSE
OK	negbinomial.size	0.999999999678234	0.999999999678234	Nfasc	FALSE
OK	negbinomial.size	0.999999999678234	0.999999999678234	Gm10538	FALSE
OK	negbinomial.size	0.999999999678234	0.999999999678234	Lrrn2	FALSE
OK	negbinomial.size	0.29680686746539	0.999999999678234	Mdm4	TRUE
OK	negbinomial.size	0.498599109735394	0.999999999678234	Pik3c2b	FALSE
OK	negbinomial.size	0.999999999678234	0.999999999678234	Gm28609	FALSE
OK	negbinomial.size	0.000325359576696775	0.0245659788432154	Ppp1r15b	TRUE
OK	negbinomial.size	0.136730775459591	0.999999999678234	Plekha6	FALSE
OK	negbinomial.size	0.999999999678234	0.999999999678234	Gm19461	FALSE
OK	negbinomial.size	0.999999999678234	0.999999999678234	Gm28040	FALSE
OK	negbinomial.size	0.999999999678234	0.999999999678234	Kiss1	FALSE
OK	negbinomial.size	0.999999999678234	0.999999999678234	Ren1	FALSE
OK	negbinomial.size	0.999999999678234	0.999999999678234	Etnk2	FALSE
OK	negbinomial.size	0.445800480104894	0.999999999678234	Sox13	FALSE
OK	negbinomial.size	0.844122735176627	0.999999999678234	Snrpe	TRUE
OK	negbinomial.size	0.821266687046177	0.999999999678234	Zc3h11a	FALSE
OK	negbinomial.size	0.357750137302401	0.999999999678234	Gm38394	FALSE
OK	negbinomial.size	0.999999999678234	0.999999999678234	Zbed6	FALSE
OK	negbinomial.size	0.999999999678234	0.999999999678234	Lax1	FALSE
OK	negbinomial.size	0.357750137302412	0.999999999678234	Atp2b4	FALSE
OK	negbinomial.size	0.999999999678234	0.999999999678234	Gm28441	FALSE
OK	negbinomial.size	0.999999999678234	0.999999999678234	Optc	FALSE
OK	negbinomial.size	0.999999999678234	0.999999999678234	Gm15851	FALSE
OK	negbinomial.size	0.999999999678234	0.999999999678234	Prelp	FALSE
OK	negbinomial.size	0.999999999678234	0.999999999678234	Gm1627	FALSE
OK	negbinomial.size	0.999999999678234	0.999999999678234	Fmod	FALSE
OK	negbinomial.size	8.96902388737996e-27	1.52213776446614e-23	Btg2	TRUE
OK	negbinomial.size	0.999999999678234	0.999999999678234	Chit1	FALSE
OK	negbinomial.size	0.243465417723133	0.999999999678234	Chil1	TRUE
OK	negbinomial.size	0.0522565995277611	0.971200504098994	Mybph	FALSE
OK	negbinomial.size	0.999999999678234	0.999999999678234	Adora1	FALSE
OK	negbinomial.size	0.999999999678234	0.999999999678234	Myog	FALSE
OK	negbinomial.size	0.999999999678234	0.999999999678234	Ppfia4	FALSE
OK	negbinomial.size	0.35696316816473	0.999999999678234	Tmem183a	FALSE
OK	negbinomial.size	0.999999999678234	0.999999999678234	4933406M09Rik	FALSE
OK	negbinomial.size	0.251252342277656	0.999999999678234	Cyb5r1	TRUE
OK	negbinomial.size	0.00394472547753522	0.179404334306239	Adipor1	TRUE
OK	negbinomial.size	0.999999999678234	0.999999999678234	Platr1	FALSE
OK	negbinomial.size	0.0530687288535068	0.971200504098994	Klhl12	FALSE
OK	negbinomial.size	0.0441864615494522	0.89160979515775	Rabif	TRUE
OK	negbinomial.size	0.999999999678234	0.999999999678234	Mgat4e	FALSE
OK	negbinomial.size	0.369947164848334	0.999999999678234	Kdm5b	TRUE
OK	negbinomial.size	0.999999999678234	0.999999999678234	Gm26783	FALSE
OK	negbinomial.size	0.999999999678234	0.999999999678234	Syt2	FALSE
OK	negbinomial.size	0.268559528626974	0.999999999678234	Ppp1r12b	FALSE
OK	negbinomial.size	0.999999999678234	0.999999999678234	Gm28892	FALSE
OK	negbinomial.size	0.999999999678234	0.999999999678234	Ube2t	FALSE
OK	negbinomial.size	0.999999999678234	0.999999999678234	Lgr6	FALSE
OK	negbinomial.size	0.999999999678234	0.999999999678234	Gm10535	FALSE
OK	negbinomial.size	0.0288818669770834	0.698123267816858	Ptpn7	FALSE
OK	negbinomial.size	0.983169197584336	0.999999999678234	Arl8a	TRUE
OK	negbinomial.size	0.999999999678234	0.999999999678234	Gm15445	FALSE
OK	negbinomial.size	0.999999999678234	0.999999999678234	Gpr37l1	FALSE
OK	negbinomial.size	0.999999999678234	0.999999999678234	Gm26642	FALSE
OK	negbinomial.size	0.999999999678234	0.999999999678234	Elf3	FALSE
OK	negbinomial.size	0.76508442606536	0.999999999678234	Rnpep	TRUE
OK	negbinomial.size	0.0530687288535055	0.971200504098994	Timm17a	FALSE
OK	negbinomial.size	0.999999999678234	0.999999999678234	Lmod1	FALSE
OK	negbinomial.size	0.999999999678234	0.999999999678234	Shisa4	FALSE
OK	negbinomial.size	0.999999999678234	0.999999999678234	Ipo9	FALSE
OK	negbinomial.size	0.999999999678234	0.999999999678234	Gm28277	FALSE
OK	negbinomial.size	0.999999999678234	0.999999999678234	Nav1	FALSE
OK	negbinomial.size	0.999999999678234	0.999999999678234	Gm4793	FALSE
OK	negbinomial.size	0.999999998712934	0.999999999678234	Csrp1	FALSE
OK	negbinomial.size	0.999999999678234	0.999999999678234	Phlda3	FALSE
OK	negbinomial.size	0.999999999678234	0.999999999678234	Tnni1	FALSE
OK	negbinomial.size	0.999999999678234	0.999999999678234	Lad1	FALSE
OK	negbinomial.size	0.999999999678234	0.999999999678234	Tnnt2	FALSE
OK	negbinomial.size	0.999999999678234	0.999999999678234	Pkp1	FALSE
OK	negbinomial.size	0.999999999678234	0.999999999678234	Igfn1	FALSE
OK	negbinomial.size	0.999999999678234	0.999999999678234	Tmem9	FALSE
OK	negbinomial.size	0.999999999678234	0.999999999678234	Ascl5	FALSE
OK	negbinomial.size	0.999999999678234	0.999999999678234	Cacna1s	FALSE
OK	negbinomial.size	0.999999999678234	0.999999999678234	Gm37759	FALSE
OK	negbinomial.size	0.357750137302411	0.999999999678234	Gm15850	FALSE
OK	negbinomial.size	0.165909316182964	0.999999999678234	Kif21b	TRUE
OK	negbinomial.size	0.999999999678234	0.999999999678234	Mroh3	FALSE
OK	negbinomial.size	0.999999999678234	0.999999999678234	Inava	FALSE
OK	negbinomial.size	0.999999999678234	0.999999999678234	Gm26568	FALSE
OK	negbinomial.size	0.999999999678234	0.999999999678234	A430034D21Rik	FALSE
OK	negbinomial.size	0.999999999678234	0.999999999678234	Gm37552	FALSE
OK	negbinomial.size	0.999999999678234	0.999999999678234	Gm26781	FALSE
OK	negbinomial.size	0.999999999678234	0.999999999678234	Gpr25	FALSE
OK	negbinomial.size	0.529384321088513	0.999999999678234	Camsap2	FALSE
OK	negbinomial.size	0.999999999678234	0.999999999678234	9230116N13Rik	FALSE
OK	negbinomial.size	0.999999999678234	0.999999999678234	Ddx59	FALSE
OK	negbinomial.size	0.999999999678234	0.999999999678234	Kif14	FALSE
OK	negbinomial.size	0.999999999678234	0.999999999678234	Gm37799	FALSE
OK	negbinomial.size	0.999999999678234	0.999999999678234	Gm33994	FALSE
OK	negbinomial.size	0.999999999678234	0.999999999678234	4933409D19Rik	FALSE
OK	negbinomial.size	0.999999999678234	0.999999999678234	Platr23	FALSE
OK	negbinomial.size	0.682800523812276	0.999999999678234	Zfp281	TRUE
OK	negbinomial.size	0.0131887445408576	0.423999070508427	Gm19705	FALSE
OK	negbinomial.size	0.999999999678234	0.999999999678234	Platr22	FALSE
OK	negbinomial.size	0.999999999678234	0.999999999678234	Nr5a2	FALSE
OK	negbinomial.size	0.999999999678234	0.999999999678234	Gm4258	FALSE
OK	negbinomial.size	0.999999999678234	0.999999999678234	Gm26979	FALSE
OK	negbinomial.size	0.999999999678234	0.999999999678234	Gm26936	FALSE
OK	negbinomial.size	0.999999999678234	0.999999999678234	Gm26930	FALSE
OK	negbinomial.size	0.999999999678234	0.999999999678234	A430106G13Rik	FALSE
OK	negbinomial.size	2.26997597500299e-07	4.08912711251238e-05	Ptprc	TRUE
OK	negbinomial.size	0.999999999678234	0.999999999678234	Gm28556	FALSE
OK	negbinomial.size	0.999999999678234	0.999999999678234	Atp6v1g3	FALSE
OK	negbinomial.size	0.654849185083036	0.999999999678234	Nek7	TRUE
OK	negbinomial.size	0.999999999678234	0.999999999678234	Gm28501	FALSE
OK	negbinomial.size	0.999999999678234	0.999999999678234	Gm5833	FALSE
OK	negbinomial.size	0.999999999678234	0.999999999678234	Lhx9	FALSE
OK	negbinomial.size	0.0201084282206091	0.555133791073236	2310009B15Rik	FALSE
OK	negbinomial.size	0.999999999678234	0.999999999678234	1700019P21Rik	FALSE
OK	negbinomial.size	0.572647543135672	0.999999999678234	Dennd1b	TRUE
OK	negbinomial.size	0.999999999678234	0.999999999678234	4930596I21Rik	FALSE
OK	negbinomial.size	0.999999999678234	0.999999999678234	Crb1	FALSE
OK	negbinomial.size	0.999999999678234	0.999999999678234	4933436E23Rik	FALSE
OK	negbinomial.size	0.999999999678234	0.999999999678234	Gm34816	FALSE
OK	negbinomial.size	0.329372941557299	0.999999999678234	Zbtb41	FALSE
OK	negbinomial.size	0.999999999678234	0.999999999678234	Aspm	FALSE
OK	negbinomial.size	0.999999999678234	0.999999999678234	F13b	FALSE
OK	negbinomial.size	0.999999999678234	0.999999999678234	Cfhr1	FALSE
OK	negbinomial.size	0.999999999678234	0.999999999678234	Gm4788	FALSE
OK	negbinomial.size	0.999999999678234	0.999999999678234	Cfhr2	FALSE
OK	negbinomial.size	0.999999999678234	0.999999999678234	Cfh	FALSE
OK	negbinomial.size	0.999999999678234	0.999999999678234	Kcnt2	FALSE
OK	negbinomial.size	0.999999999678234	0.999999999678234	4930590L20Rik	FALSE
OK	negbinomial.size	0.260538475996787	0.999999999678234	Cdc73	TRUE
OK	negbinomial.size	0.999999999678234	0.999999999678234	B3galt2	FALSE
OK	negbinomial.size	0.029374584628586	0.705274371815902	Glrx2	TRUE
OK	negbinomial.size	0.357750137302412	0.999999999678234	Ro60	FALSE
OK	negbinomial.size	0.00492906298197289	0.211634668247291	Uchl5	TRUE
OK	negbinomial.size	0.3577501373024	0.999999999678234	Gm29170	FALSE
OK	negbinomial.size	0.0588099158730253	0.999999999678234	Rgs2	TRUE
OK	negbinomial.size	0.999999999678234	0.999999999678234	Rgs13	FALSE
OK	negbinomial.size	0.0292423426981368	0.702622459240999	Rgs1	TRUE
OK	negbinomial.size	0.999999999678234	0.999999999678234	Rgs21	FALSE
OK	negbinomial.size	0.920898012722555	0.999999999678234	Rgs18	TRUE
OK	negbinomial.size	0.999999999678234	0.999999999678234	Gm29514	FALSE
OK	negbinomial.size	0.999999999678234	0.999999999678234	Brinp3	FALSE
OK	negbinomial.size	0.999999999678234	0.999999999678234	A230059L01Rik	FALSE
OK	negbinomial.size	0.999999999678234	0.999999999678234	Gm15584	FALSE
OK	negbinomial.size	0.999999999678234	0.999999999678234	Gm29515	FALSE
OK	negbinomial.size	0.999999999678234	0.999999999678234	Gm29020	FALSE
OK	negbinomial.size	0.999999999678234	0.999999999678234	Gm29398	FALSE
OK	negbinomial.size	0.524005730538788	0.999999999678234	Pla2g4a	FALSE
OK	negbinomial.size	0.240583352591502	0.999999999678234	Ptgs2os	FALSE
OK	negbinomial.size	1.05857213410587e-27	2.00786226260257e-24	Ptgs2	TRUE
OK	negbinomial.size	1.67307653066491e-05	0.00193363271438315	Ptgs2os2	TRUE
OK	negbinomial.size	0.999999999678234	0.999999999678234	Pdc	FALSE
OK	negbinomial.size	0.999999999678234	0.999999999678234	2310030A07Rik	FALSE
OK	negbinomial.size	0.204457609522132	0.999999999678234	Odr4	FALSE
OK	negbinomial.size	0.94052171665657	0.999999999678234	Tpr	TRUE
OK	negbinomial.size	0.999999999678234	0.999999999678234	Prg4	FALSE
OK	negbinomial.size	0.999999999678234	0.999999999678234	Hmcn1	FALSE
OK	negbinomial.size	0.999999999678234	0.999999999678234	Gm20631	FALSE
OK	negbinomial.size	0.999999999678234	0.999999999678234	Gm29188	FALSE
OK	negbinomial.size	0.999999999678234	0.999999999678234	C730036E19Rik	FALSE
OK	negbinomial.size	0.999999999678234	0.999999999678234	Gm47985	FALSE
OK	negbinomial.size	0.999999999678234	0.999999999678234	Gm8947	FALSE
OK	negbinomial.size	0.999999999678234	0.999999999678234	Gm47995	FALSE
OK	negbinomial.size	0.999999999678234	0.999999999678234	3110040M04Rik	FALSE
OK	negbinomial.size	0.999999999678234	0.999999999678234	Gm47996	FALSE
OK	negbinomial.size	0.999999999678234	0.999999999678234	Gm10138	FALSE
OK	negbinomial.size	0.841585804957657	0.999999999678234	Ivns1abp	FALSE
OK	negbinomial.size	0.727653940961293	0.999999999678234	Swt1	TRUE
OK	negbinomial.size	0.179285438245932	0.999999999678234	Trmt1l	FALSE
OK	negbinomial.size	0.0718950972398298	0.999999999678234	Rnf2	TRUE
OK	negbinomial.size	0.999999999678234	0.999999999678234	Gm28181	FALSE
OK	negbinomial.size	0.00304854284658868	0.146936119713381	Fam129a	TRUE
OK	negbinomial.size	0.999999999678234	0.999999999678234	2810414N06Rik	FALSE
OK	negbinomial.size	0.872591670528326	0.999999999678234	Edem3	FALSE
OK	negbinomial.size	0.999999999442684	0.999999999678234	1700025G04Rik	FALSE
OK	negbinomial.size	0.999999999678234	0.999999999678234	Gm28610	FALSE
OK	negbinomial.size	0.999999999678234	0.999999999678234	Tsen15	FALSE
OK	negbinomial.size	0.999999999678234	0.999999999678234	Colgalt2	FALSE
OK	negbinomial.size	0.999999999678234	0.999999999678234	Rgl1	FALSE
OK	negbinomial.size	0.999999999678234	0.999999999678234	Gm15479	FALSE
OK	negbinomial.size	0.999999999678234	0.999999999678234	Gm28792	FALSE
OK	negbinomial.size	0.999999999678234	0.999999999678234	Apobec4	FALSE
OK	negbinomial.size	0.554492240130265	0.999999999678234	Arpc5	TRUE
OK	negbinomial.size	0.000581797201828282	0.0398302564181591	Ncf2	TRUE
OK	negbinomial.size	0.0567978141382308	0.999999999678234	Smg7	FALSE
OK	negbinomial.size	0.695035941218035	0.999999999678234	Gm28791	FALSE
OK	negbinomial.size	0.999999999678234	0.999999999678234	Nmnat2	FALSE
OK	negbinomial.size	0.999999999678234	0.999999999678234	Gm28960	FALSE
OK	negbinomial.size	0.999999999678234	0.999999999678234	Lamc2	FALSE
OK	negbinomial.size	0.999999999678234	0.999999999678234	Lamc1	FALSE
OK	negbinomial.size	0.999999999678234	0.999999999678234	E330020D12Rik	FALSE
OK	negbinomial.size	0.999999999678234	0.999999999678234	Shcbp1l	FALSE
OK	negbinomial.size	0.441500076321066	0.999999999678234	Dhx9	FALSE
OK	negbinomial.size	0.103152574242071	0.999999999678234	Npl	TRUE
OK	negbinomial.size	0.999999999678234	0.999999999678234	Rgs8	FALSE
OK	negbinomial.size	0.999999999678234	0.999999999678234	Gm29529	FALSE
OK	negbinomial.size	0.999999999678234	0.999999999678234	C230024C17Rik	FALSE
OK	negbinomial.size	0.999999999442684	0.999999999678234	Rgs16	FALSE
OK	negbinomial.size	0.999999999678234	0.999999999678234	Gm28513	FALSE
OK	negbinomial.size	0.0134768043561174	0.429831410942637	Rnasel	TRUE
OK	negbinomial.size	0.357750137302418	0.999999999678234	Gm28512	FALSE
OK	negbinomial.size	0.357750137302414	0.999999999678234	Rgsl1	FALSE
OK	negbinomial.size	0.999999999678234	0.999999999678234	Teddm2	FALSE
OK	negbinomial.size	0.999999999678234	0.999999999678234	Teddm1b	FALSE
OK	negbinomial.size	0.999999999678234	0.999999999678234	Teddm1a	FALSE
OK	negbinomial.size	0.0404255562181054	0.848647174643755	Glul	TRUE
OK	negbinomial.size	0.999999999678234	0.999999999678234	Gm29290	FALSE
OK	negbinomial.size	0.999999999678234	0.999999999678234	Gm29291	FALSE
OK	negbinomial.size	0.999999999678234	0.999999999678234	Gm28286	FALSE
OK	negbinomial.size	0.999999999678234	0.999999999678234	A830008E24Rik	FALSE
OK	negbinomial.size	0.999999999678234	0.999999999678234	Zfp648	FALSE
OK	negbinomial.size	0.999999999678234	0.999999999678234	4930452N14Rik	FALSE
OK	negbinomial.size	0.999999999678234	0.999999999678234	4930532M18Rik	FALSE
OK	negbinomial.size	0.35775013730241	0.999999999678234	Cacna1e	FALSE
OK	negbinomial.size	0.999999999678234	0.999999999678234	Gm29282	FALSE
OK	negbinomial.size	0.200934022353793	0.999999999678234	Gm9530	FALSE
OK	negbinomial.size	1.85931136259008e-09	4.68386678802478e-07	Ier5	TRUE
OK	negbinomial.size	0.999999999678234	0.999999999678234	Mr1	FALSE
OK	negbinomial.size	0.286162314255747	0.999999999678234	Stx6	FALSE
OK	negbinomial.size	0.999999999678234	0.999999999678234	BC034090	FALSE
OK	negbinomial.size	0.999999999678234	0.999999999678234	Gm37622	FALSE
OK	negbinomial.size	0.0581402873966262	0.999999999678234	Xpr1	TRUE
OK	negbinomial.size	0.999999999678234	0.999999999678234	Gm5532	FALSE
OK	negbinomial.size	0.0362260719229879	0.792985815914717	Acbd6	FALSE
OK	negbinomial.size	0.999999999678234	0.999999999678234	Lhx4	FALSE
OK	negbinomial.size	0.00151501014596808	0.0861331815569787	Qsox1	TRUE
OK	negbinomial.size	0.999999999678234	0.999999999678234	Gm37571	FALSE
OK	negbinomial.size	0.907962132938889	0.999999999678234	Cep350	TRUE
OK	negbinomial.size	0.0551502813803214	0.998495689561181	Tor1aip1	TRUE
OK	negbinomial.size	0.735357879341888	0.999999999678234	Tor1aip2	FALSE
OK	negbinomial.size	0.999999999678234	0.999999999678234	Fam163a	FALSE
OK	negbinomial.size	0.999999999678234	0.999999999678234	Tdrd5	FALSE
OK	negbinomial.size	0.999999999678234	0.999999999678234	4930518J20Rik	FALSE
OK	negbinomial.size	0.999999999678234	0.999999999678234	Nphs2	FALSE
OK	negbinomial.size	0.999999999678234	0.999999999678234	Axdnd1	FALSE
OK	negbinomial.size	0.0832102479607304	0.999999999678234	Gm2000	FALSE
OK	negbinomial.size	0.723122343753273	0.999999999678234	Soat1	TRUE
OK	negbinomial.size	0.101944768494431	0.999999999678234	Abl2	FALSE
OK	negbinomial.size	0.100893514480217	0.999999999678234	Tor3a	FALSE
OK	negbinomial.size	0.999999999052745	0.999999999678234	Fam20b	FALSE
OK	negbinomial.size	0.318591840362366	0.999999999678234	Ralgps2	FALSE
OK	negbinomial.size	0.999999999678234	0.999999999678234	Angptl1	FALSE
OK	negbinomial.size	0.999999999678234	0.999999999678234	4930439D14Rik	FALSE
OK	negbinomial.size	0.999999999678234	0.999999999678234	Gm28694	FALSE
OK	negbinomial.size	0.999999999678234	0.999999999678234	Tex35	FALSE
OK	negbinomial.size	0.999999999678234	0.999999999678234	Rasal2	FALSE
OK	negbinomial.size	0.268559528626976	0.999999999678234	Cryzl2	FALSE
OK	negbinomial.size	0.999999999678234	0.999999999678234	Gm15486	FALSE
OK	negbinomial.size	0.999999999678234	0.999999999678234	Sec16b	FALSE
OK	negbinomial.size	0.999999999678234	0.999999999678234	Brinp2	FALSE
OK	negbinomial.size	0.999999999678234	0.999999999678234	Astn1	FALSE
OK	negbinomial.size	0.999999999678234	0.999999999678234	Gm37679	FALSE
OK	negbinomial.size	0.999999999678234	0.999999999678234	Pappa2	FALSE
OK	negbinomial.size	0.999999999678234	0.999999999678234	1600012P17Rik	FALSE
OK	negbinomial.size	0.999999999678234	0.999999999678234	4930562F17Rik	FALSE
OK	negbinomial.size	0.137648934179706	0.999999999678234	Cop1	TRUE
OK	negbinomial.size	0.999999999678234	0.999999999678234	Tnr	FALSE
OK	negbinomial.size	0.999999999678234	0.999999999678234	Gm10530	FALSE
OK	negbinomial.size	0.999999999678234	0.999999999678234	Gm38039	FALSE
OK	negbinomial.size	0.999999999678234	0.999999999678234	Gm37294	FALSE
OK	negbinomial.size	0.405586631258089	0.999999999678234	4930523C07Rik	TRUE
OK	negbinomial.size	0.999999999678234	0.999999999678234	4930562F07Rik	FALSE
OK	negbinomial.size	0.999999999678234	0.999999999678234	Tnn	FALSE
OK	negbinomial.size	0.0368344690037926	0.802082423241423	Mrps14	FALSE
OK	negbinomial.size	0.648552708984844	0.999999999678234	Cacybp	FALSE
OK	negbinomial.size	0.694024560972929	0.999999999678234	Rabgap1l	FALSE
OK	negbinomial.size	0.999999999678234	0.999999999678234	Gm36975	FALSE
OK	negbinomial.size	0.999999999678234	0.999999999678234	Gm37529	FALSE
OK	negbinomial.size	0.999999999678234	0.999999999678234	Gpr52	FALSE
OK	negbinomial.size	0.999999999678234	0.999999999678234	Gm37328	FALSE
OK	negbinomial.size	0.999999999678234	0.999999999678234	Gm37083	FALSE
OK	negbinomial.size	0.999999999678234	0.999999999678234	Gm38060	FALSE
OK	negbinomial.size	0.813783190466718	0.999999999678234	Rc3h1	TRUE
OK	negbinomial.size	0.999999999442684	0.999999999678234	Serpinc1	FALSE
OK	negbinomial.size	0.555356402378563	0.999999999678234	Zbtb37	FALSE
OK	negbinomial.size	0.999999999678234	0.999999999678234	Gm37362	FALSE
OK	negbinomial.size	0.699399634671807	0.999999999678234	Gas5	TRUE
OK	negbinomial.size	0.0468695778560325	0.922337123301368	Dars2	FALSE
OK	negbinomial.size	0.999999999678234	0.999999999678234	Gm37634	FALSE
OK	negbinomial.size	0.0216886475912433	0.581822330765093	Cenpl	FALSE
OK	negbinomial.size	0.342893979247926	0.999999999678234	Klhl20	FALSE
OK	negbinomial.size	0.999999999678234	0.999999999678234	Ankrd45	FALSE
OK	negbinomial.size	0.999999999678234	0.999999999678234	Tex50	FALSE
OK	negbinomial.size	0.105121845486741	0.999999999678234	Prdx6	TRUE
OK	negbinomial.size	0.999999999678234	0.999999999678234	Tnfsf4	FALSE
OK	negbinomial.size	0.999999999678234	0.999999999678234	Tnfsf18	FALSE
OK	negbinomial.size	0.329372941557297	0.999999999678234	Fasl	FALSE
OK	negbinomial.size	0.0457101338212854	0.914344457237808	Suco	TRUE
OK	negbinomial.size	0.999999999678234	0.999999999678234	Gm31925	FALSE
OK	negbinomial.size	0.999999999678234	0.999999999678234	4930558K02Rik	FALSE
OK	negbinomial.size	0.999999999442684	0.999999999678234	Pigc	FALSE
OK	negbinomial.size	0.999999999678234	0.999999999678234	Gm38304	FALSE
OK	negbinomial.size	0.999999999678234	0.999999999678234	Dnm3	FALSE
OK	negbinomial.size	0.999999999678234	0.999999999678234	2810442N19Rik	FALSE
OK	negbinomial.size	0.999999999678234	0.999999999678234	Dnm3os	FALSE
OK	negbinomial.size	0.00101349107597853	0.0639530719078817	Eef1aknmt	FALSE
OK	negbinomial.size	0.325775112687914	0.999999999678234	Vamp4	TRUE
OK	negbinomial.size	0.999999999678234	0.999999999678234	Myoc	FALSE
OK	negbinomial.size	0.999999999678234	0.999999999678234	Myocos	FALSE
OK	negbinomial.size	0.0236978437180514	0.618614961494076	Prrc2c	TRUE
OK	negbinomial.size	0.999999999678234	0.999999999678234	Fmo4	FALSE
OK	negbinomial.size	0.999999999678234	0.999999999678234	Fmo1	FALSE
OK	negbinomial.size	0.999999999678234	0.999999999678234	Fmo2	FALSE
OK	negbinomial.size	0.999999999678234	0.999999999678234	Fmo6	FALSE
OK	negbinomial.size	0.999999999678234	0.999999999678234	Fmo3	FALSE
OK	negbinomial.size	0.999999999678234	0.999999999678234	Gm37273	FALSE
OK	negbinomial.size	0.999999999678234	0.999999999678234	Mroh9	FALSE
OK	negbinomial.size	0.999999999678234	0.999999999678234	Prrx1	FALSE
OK	negbinomial.size	0.999999999678234	0.999999999678234	Gm20471	FALSE
OK	negbinomial.size	0.115356171133643	0.999999999678234	Gorab	FALSE
OK	negbinomial.size	0.999999999678234	0.999999999678234	Gm29500	FALSE
OK	negbinomial.size	0.999999999678234	0.999999999678234	Mettl11b	FALSE
OK	negbinomial.size	0.999999999678234	0.999999999678234	Kifap3	FALSE
OK	negbinomial.size	0.171241322436672	0.999999999678234	Scyl3	FALSE
OK	negbinomial.size	0.268559528626975	0.999999999678234	BC055324	FALSE
OK	negbinomial.size	0.999999999442684	0.999999999678234	Mettl18	FALSE
OK	negbinomial.size	0.999999999678234	0.999999999678234	Sele	FALSE
OK	negbinomial.size	0.000899449749307497	0.0578897348631143	Sell	TRUE
OK	negbinomial.size	0.181213835452748	0.999999999678234	Selp	TRUE
OK	negbinomial.size	0.357750137302412	0.999999999678234	Gm16587	FALSE
OK	negbinomial.size	0.523926334229416	0.999999999678234	Gm16548	FALSE
OK	negbinomial.size	0.990414321626843	0.999999999678234	F5	TRUE
OK	negbinomial.size	0.357750137302419	0.999999999678234	Slc19a2	FALSE
OK	negbinomial.size	0.999999999442684	0.999999999678234	Ccdc181	FALSE
OK	negbinomial.size	0.480622717062337	0.999999999678234	Blzf1	FALSE
OK	negbinomial.size	0.999999999442684	0.999999999678234	Nme7	FALSE
OK	negbinomial.size	0.999999999442684	0.999999999678234	Atp1b1	FALSE
OK	negbinomial.size	0.999999999678234	0.999999999678234	Gm32391	FALSE
OK	negbinomial.size	0.999999999678234	0.999999999678234	Gm26685	FALSE
OK	negbinomial.size	0.999999999678234	0.999999999678234	Gm37754	FALSE
OK	negbinomial.size	0.999999999678234	0.999999999678234	Gm37853	FALSE
OK	negbinomial.size	0.999999999678234	0.999999999678234	Gm37184	FALSE
OK	negbinomial.size	0.999999999678234	0.999999999678234	Gm36945	FALSE
OK	negbinomial.size	0.999999999678234	0.999999999678234	Dpt	FALSE
OK	negbinomial.size	0.999999999678234	0.999999999678234	Gm32569	FALSE
OK	negbinomial.size	0.999999999678234	0.999999999678234	Gm20743	FALSE
OK	negbinomial.size	0.999999999442684	0.999999999678234	Xcl1	FALSE
OK	negbinomial.size	0.999999999678234	0.999999999678234	1700029M03Rik	FALSE
OK	negbinomial.size	0.999999999678234	0.999999999678234	4930568G15Rik	FALSE
OK	negbinomial.size	0.999999999678234	0.999999999678234	Tbx19	FALSE
OK	negbinomial.size	0.444755276963706	0.999999999678234	Sft2d2	TRUE
OK	negbinomial.size	0.808553294122255	0.999999999678234	Tiprl	TRUE
OK	negbinomial.size	0.999999999678234	0.999999999678234	Gm38190	FALSE
OK	negbinomial.size	0.999999999678234	0.999999999678234	Gpr161	FALSE
OK	negbinomial.size	0.0846471852449364	0.999999999678234	Dcaf6	FALSE
OK	negbinomial.size	0.197326362681086	0.999999999678234	Gm37864	FALSE
OK	negbinomial.size	1.30294346680099e-08	2.94302591135831e-06	Mpc2	TRUE
OK	negbinomial.size	0.999999999678234	0.999999999678234	Adcy10	FALSE
OK	negbinomial.size	0.999999999678234	0.999999999678234	Gm38325	FALSE
OK	negbinomial.size	0.999999999678234	0.999999999678234	Mpzl1	FALSE
OK	negbinomial.size	0.253717610612095	0.999999999678234	Rcsd1	TRUE
OK	negbinomial.size	0.999999999678234	0.999999999678234	Gm37073	FALSE
OK	negbinomial.size	0.144190323285895	0.999999999678234	Creg1	TRUE
OK	negbinomial.size	0.999999999678234	0.999999999678234	Gm36972	FALSE
OK	negbinomial.size	0.999999999678234	0.999999999678234	Gm16565	FALSE
OK	negbinomial.size	0.00608745311451333	0.249098890453658	Cd247	FALSE
OK	negbinomial.size	0.999999999678234	0.999999999678234	Gm37469	FALSE
OK	negbinomial.size	0.367575918110549	0.999999999678234	Pou2f1	FALSE
OK	negbinomial.size	0.999999999678234	0.999999999678234	Gm26665	FALSE
OK	negbinomial.size	0.999999999678234	0.999999999678234	Gm37923	FALSE
OK	negbinomial.size	0.999999999678234	0.999999999678234	Dusp27	FALSE
OK	negbinomial.size	0.999999999678234	0.999999999678234	Gpa33	FALSE
OK	negbinomial.size	0.999999999678234	0.999999999678234	Mael	FALSE
OK	negbinomial.size	0.999999999678234	0.999999999678234	Ildr2	FALSE
OK	negbinomial.size	0.999999999678234	0.999999999678234	5330438I03Rik	FALSE
OK	negbinomial.size	0.999999999678234	0.999999999678234	Gm15853	FALSE
OK	negbinomial.size	0.229288103132621	0.999999999678234	Tada1	FALSE
OK	negbinomial.size	0.999999999678234	0.999999999678234	Pogk	FALSE
OK	negbinomial.size	0.999999999678234	0.999999999678234	Gm4846	FALSE
OK	negbinomial.size	0.999999999678234	0.999999999678234	Gm4847	FALSE
OK	negbinomial.size	0.999999999678234	0.999999999678234	Fmo9	FALSE
OK	negbinomial.size	0.999999999678234	0.999999999678234	Gm16701	FALSE
OK	negbinomial.size	0.153731476406457	0.999999999678234	Fam78b	FALSE
OK	negbinomial.size	0.22618544476736	0.999999999678234	Uck2	FALSE
OK	negbinomial.size	0.999999999678234	0.999999999678234	Gm37982	FALSE
OK	negbinomial.size	0.999999999678234	0.999999999678234	Gm2453	FALSE
OK	negbinomial.size	0.622246645887217	0.999999999678234	Tmco1	FALSE
OK	negbinomial.size	0.999999999678234	0.999999999678234	Aldh9a1	FALSE
OK	negbinomial.size	0.999999999678234	0.999999999678234	Mgst3	FALSE
OK	negbinomial.size	0.999999999678234	0.999999999678234	Lrrc52	FALSE
OK	negbinomial.size	0.999999999678234	0.999999999678234	Rxrg	FALSE
OK	negbinomial.size	0.999999999678234	0.999999999678234	Lmx1a	FALSE
OK	negbinomial.size	0.999999999678234	0.999999999678234	Gm20711	FALSE
OK	negbinomial.size	0.0300563588277619	0.710533204106438	Pbx1	TRUE
OK	negbinomial.size	0.999999999678234	0.999999999678234	Gm37839	FALSE
OK	negbinomial.size	0.999999999678234	0.999999999678234	Nuf2	FALSE
OK	negbinomial.size	0.999999999678234	0.999999999678234	Rgs5	FALSE
OK	negbinomial.size	0.999999999678234	0.999999999678234	Rgs4	FALSE
OK	negbinomial.size	0.999999999678234	0.999999999678234	Ccdc190	FALSE
OK	negbinomial.size	0.999999999678234	0.999999999678234	Gm15852	FALSE
OK	negbinomial.size	0.999999999109069	0.999999999678234	Hsd17b7	FALSE
OK	negbinomial.size	0.999999999678234	0.999999999678234	3110045C21Rik	FALSE
OK	negbinomial.size	0.999999999678234	0.999999999678234	Ddr2	FALSE
OK	negbinomial.size	0.0209939277253175	0.570302611207135	Uap1	FALSE
OK	negbinomial.size	0.999999999678234	0.999999999678234	Gm37748	FALSE
OK	negbinomial.size	0.999999999678234	0.999999999678234	Gm37502	FALSE
OK	negbinomial.size	0.862739312173736	0.999999999678234	Uhmk1	FALSE
OK	negbinomial.size	0.999999999678234	0.999999999678234	4930500M09Rik	FALSE
OK	negbinomial.size	0.999999999678234	0.999999999678234	Sh2d1b2	FALSE
OK	negbinomial.size	0.999999999678234	0.999999999678234	Sh2d1b1	FALSE
OK	negbinomial.size	0.872591670528361	0.999999999678234	Gm7694	FALSE
OK	negbinomial.size	0.197251335850491	0.999999999678234	Nos1ap	FALSE
OK	negbinomial.size	0.999999999678234	0.999999999678234	Spata46	FALSE
OK	negbinomial.size	0.999999999678234	0.999999999678234	Olfml2b	FALSE
OK	negbinomial.size	0.00914282258243966	0.333118999063013	Atf6	TRUE
OK	negbinomial.size	0.999999999678234	0.999999999678234	Gm9929	FALSE
OK	negbinomial.size	0.357750137302412	0.999999999678234	Dusp12	FALSE
OK	negbinomial.size	0.999999999678234	0.999999999678234	Gm26620	FALSE
OK	negbinomial.size	0.999999999678234	0.999999999678234	Fcrlb	FALSE
OK	negbinomial.size	0.999999999442684	0.999999999678234	Fcrla	FALSE
OK	negbinomial.size	0.692360499697362	0.999999999678234	Fcgr2b	FALSE
OK	negbinomial.size	0.999999999678234	0.999999999678234	Gm38204	FALSE
OK	negbinomial.size	0.35775013730242	0.999999999678234	Gm10522	FALSE
OK	negbinomial.size	0.711364647180003	0.999999999678234	Fcgr4	TRUE
OK	negbinomial.size	0.493666460423411	0.999999999678234	Fcgr3	TRUE
OK	negbinomial.size	0.999999999678234	0.999999999678234	Cfap126	FALSE
OK	negbinomial.size	0.494240877273733	0.999999999678234	Sdhc	FALSE
OK	negbinomial.size	0.999999999678234	0.999999999678234	Mpz	FALSE
OK	negbinomial.size	0.357750137302403	0.999999999678234	Pcp4l1	FALSE
OK	negbinomial.size	0.999999999678234	0.999999999678234	Nr1i3	FALSE
OK	negbinomial.size	0.728711866516624	0.999999999678234	Tomm40l	FALSE
OK	negbinomial.size	0.999999999678234	0.999999999678234	Apoa2	FALSE
OK	negbinomial.size	0.213326069362313	0.999999999678234	Fcer1g	TRUE
OK	negbinomial.size	0.0252494342362839	0.646165084880138	Ndufs2	FALSE
OK	negbinomial.size	0.999999999678234	0.999999999678234	Adamts4	FALSE
OK	negbinomial.size	0.71509212002671	0.999999999678234	B4galt3	TRUE
OK	negbinomial.size	0.653226937557695	0.999999999678234	Ppox	FALSE
OK	negbinomial.size	0.329372941557288	0.999999999678234	Usp21	FALSE
OK	negbinomial.size	0.945361166571109	0.999999999678234	Ufc1	TRUE
OK	negbinomial.size	0.243801778992246	0.999999999678234	Gm20045	FALSE
OK	negbinomial.size	0.901360423472655	0.999999999678234	Dedd	FALSE
OK	negbinomial.size	0.198798182787081	0.999999999678234	Nit1	FALSE
OK	negbinomial.size	0.19277162604762	0.999999999678234	Pfdn2	TRUE
OK	negbinomial.size	0.999999999678234	0.999999999678234	Klhdc9	FALSE
OK	negbinomial.size	0.999999999678234	0.999999999678234	Nectin4	FALSE
OK	negbinomial.size	0.365226893876583	0.999999999678234	Arhgap30	TRUE
OK	negbinomial.size	0.399814031317277	0.999999999678234	Usf1	TRUE
OK	negbinomial.size	0.999999999678234	0.999999999678234	Tstd1	FALSE
OK	negbinomial.size	0.165574162911194	0.999999999678234	F11r	FALSE
OK	negbinomial.size	0.223926750175197	0.999999999678234	B930036N10Rik	FALSE
OK	negbinomial.size	0.095855939476694	0.999999999678234	Alyref2	FALSE
OK	negbinomial.size	0.999999999678234	0.999999999678234	Itln1	FALSE
OK	negbinomial.size	1.81362927475866e-07	3.30398169291486e-05	Cd244a	TRUE
OK	negbinomial.size	0.999999999109069	0.999999999678234	Ly9	FALSE
OK	negbinomial.size	0.999999999678234	0.999999999678234	Slamf7	FALSE
OK	negbinomial.size	0.999999999678234	0.999999999678234	Gm37787	FALSE
OK	negbinomial.size	0.999999999678234	0.999999999678234	A630035G10Rik	FALSE
OK	negbinomial.size	0.318591840362363	0.999999999678234	Cd48	FALSE
OK	negbinomial.size	0.999999999442684	0.999999999678234	Slamf1	FALSE
OK	negbinomial.size	1.63611302343346e-05	0.00189771454822345	Cd84	TRUE
OK	negbinomial.size	0.268559528626977	0.999999999678234	Gm10521	FALSE
OK	negbinomial.size	0.999999999442684	0.999999999678234	Gm37065	FALSE
OK	negbinomial.size	0.0655515110698029	0.999999999678234	Slamf6	FALSE
OK	negbinomial.size	0.153731476407057	0.999999999678234	Vangl2	FALSE
OK	negbinomial.size	0.999999999678234	0.999999999678234	Nhlh1	FALSE
OK	negbinomial.size	0.112252439526747	0.999999999678234	Ncstn	TRUE
OK	negbinomial.size	0.835640969197063	0.999999999678234	Copa	TRUE
OK	negbinomial.size	0.999999999678234	0.999999999678234	Gm37756	FALSE
OK	negbinomial.size	0.520445196909697	0.999999999678234	Pex19	FALSE
OK	negbinomial.size	0.719261549885408	0.999999999678234	Dcaf8	FALSE
OK	negbinomial.size	0.329372941557288	0.999999999678234	Pea15a	FALSE
OK	negbinomial.size	0.999999999678234	0.999999999678234	Casq1	FALSE
OK	negbinomial.size	0.999999999678234	0.999999999678234	Gm17224	FALSE
OK	negbinomial.size	0.999999999678234	0.999999999678234	Atp1a4	FALSE
OK	negbinomial.size	0.999999999678234	0.999999999678234	Gm37950	FALSE
OK	negbinomial.size	0.115356171133645	0.999999999678234	Igsf8	FALSE
OK	negbinomial.size	0.999999999678234	0.999999999678234	Atp1a2	FALSE
OK	negbinomial.size	0.999999999678234	0.999999999678234	Kcnj9	FALSE
OK	negbinomial.size	0.999999999678234	0.999999999678234	Gm36937	FALSE
OK	negbinomial.size	0.999999999678234	0.999999999678234	Kcnj10	FALSE
OK	negbinomial.size	0.318591840362366	0.999999999678234	Pigm	FALSE
OK	negbinomial.size	0.999999999678234	0.999999999678234	Slamf9	FALSE
OK	negbinomial.size	0.999999999678234	0.999999999678234	Igsf9	FALSE
OK	negbinomial.size	0.557448464486138	0.999999999678234	Tagln2	TRUE
OK	negbinomial.size	0.115356171133647	0.999999999678234	Cfap45	FALSE
OK	negbinomial.size	0.180331983751531	0.999999999678234	4933439K11Rik	FALSE
OK	negbinomial.size	0.999999999678234	0.999999999678234	Vsig8	FALSE
OK	negbinomial.size	0.999999999678234	0.999999999678234	Slamf8	FALSE
OK	negbinomial.size	0.999999999678234	0.999999999678234	Fcrl6	FALSE
OK	negbinomial.size	0.999999999678234	0.999999999678234	Dusp23	FALSE
OK	negbinomial.size	0.999999999678234	0.999999999678234	Crp	FALSE
OK	negbinomial.size	0.999999999678234	0.999999999678234	Apcs	FALSE
OK	negbinomial.size	0.999999999678234	0.999999999678234	Olfr16	FALSE
OK	negbinomial.size	0.999999999678234	0.999999999678234	Olfr1408	FALSE
OK	negbinomial.size	0.999999999678234	0.999999999678234	Olfr1406	FALSE
OK	negbinomial.size	0.999999999678234	0.999999999678234	Olfr218	FALSE
OK	negbinomial.size	0.999999999678234	0.999999999678234	Olfr1404	FALSE
OK	negbinomial.size	0.999999999678234	0.999999999678234	Fcer1a	FALSE
OK	negbinomial.size	0.999999999678234	0.999999999678234	Olfr418	FALSE
OK	negbinomial.size	0.999999999678234	0.999999999678234	Mptx2	FALSE
OK	negbinomial.size	0.999999999678234	0.999999999678234	Ackr1	FALSE
OK	negbinomial.size	0.999999999678234	0.999999999678234	Cadm3	FALSE
OK	negbinomial.size	0.0567978102168101	0.999999999678234	Aim2	FALSE
OK	negbinomial.size	0.999999999442684	0.999999999678234	Ifi206	FALSE
OK	negbinomial.size	0.999999999678234	0.999999999678234	Ifi214	FALSE
OK	negbinomial.size	0.999999999678234	0.999999999678234	Ifi213	FALSE
OK	negbinomial.size	0.171241322436674	0.999999999678234	Ifi209	FALSE
OK	negbinomial.size	0.329372941557297	0.999999999678234	Ifi208	FALSE
OK	negbinomial.size	0.999999999678234	0.999999999678234	Ifi207	FALSE
OK	negbinomial.size	0.999999999678234	0.999999999678234	Ifi204	FALSE
OK	negbinomial.size	0.999999999442684	0.999999999678234	Mndal	FALSE
OK	negbinomial.size	0.357750137302408	0.999999999678234	Ifi211	FALSE
OK	negbinomial.size	0.357750137302401	0.999999999678234	Ifi203	FALSE
OK	negbinomial.size	0.153731476406452	0.999999999678234	Ifi202b	FALSE
OK	negbinomial.size	0.999999999678234	0.999999999678234	Ifi205	FALSE
OK	negbinomial.size	0.999999999678234	0.999999999678234	Olfr433	FALSE
OK	negbinomial.size	0.999999999678234	0.999999999678234	Olfr432	FALSE
OK	negbinomial.size	0.999999999678234	0.999999999678234	Olfr430	FALSE
OK	negbinomial.size	0.999999999678234	0.999999999678234	Olfr429	FALSE
OK	negbinomial.size	0.999999999678234	0.999999999678234	Olfr427	FALSE
OK	negbinomial.size	0.999999999678234	0.999999999678234	Olfr231	FALSE
OK	negbinomial.size	0.999999999678234	0.999999999678234	Olfr424	FALSE
OK	negbinomial.size	0.999999999678234	0.999999999678234	Olfr420	FALSE
OK	negbinomial.size	0.999999999678234	0.999999999678234	Spta1	FALSE
OK	negbinomial.size	0.999999999678234	0.999999999678234	Olfr419	FALSE
OK	negbinomial.size	0.999999999678234	0.999999999678234	Mptx1	FALSE
OK	negbinomial.size	0.999999999678234	0.999999999678234	Olfr417	FALSE
OK	negbinomial.size	0.999999999678234	0.999999999678234	Olfr248	FALSE
OK	negbinomial.size	0.999999999678234	0.999999999678234	Olfr414	FALSE
OK	negbinomial.size	0.999999999678234	0.999999999678234	Olfr220	FALSE
OK	negbinomial.size	0.999999999678234	0.999999999678234	Fmn2	FALSE
OK	negbinomial.size	0.999999999678234	0.999999999678234	Grem2	FALSE
OK	negbinomial.size	0.999999999678234	0.999999999678234	Rgs7	FALSE
OK	negbinomial.size	0.999999999678234	0.999999999678234	Gm36307	FALSE
OK	negbinomial.size	0.999999999442684	0.999999999678234	Fh1	FALSE
OK	negbinomial.size	0.268559528626976	0.999999999678234	Kmo	FALSE
OK	negbinomial.size	0.999999999678234	0.999999999678234	Opn3	FALSE
OK	negbinomial.size	0.357750137302411	0.999999999678234	Chml	FALSE
OK	negbinomial.size	0.999999999678234	0.999999999678234	Wdr64	FALSE
OK	negbinomial.size	0.999999999678234	0.999999999678234	Exo1	FALSE
OK	negbinomial.size	0.999999999678234	0.999999999678234	Gm38100	FALSE
OK	negbinomial.size	0.999999999678234	0.999999999678234	Pld5	FALSE
OK	negbinomial.size	0.999999999678234	0.999999999678234	Rbm8a2	FALSE
OK	negbinomial.size	0.999999999678234	0.999999999678234	Gm38101	FALSE
OK	negbinomial.size	0.999999999678234	0.999999999678234	Gm36536	FALSE
OK	negbinomial.size	0.940335357471471	0.999999999678234	Cep170	FALSE
OK	negbinomial.size	0.999999999678234	0.999999999678234	Gm36992	FALSE
OK	negbinomial.size	0.368681506008736	0.999999999678234	Sdccag8	FALSE
OK	negbinomial.size	0.999999999678234	0.999999999678234	Gm15423	FALSE
OK	negbinomial.size	0.357750137302401	0.999999999678234	Akt3	FALSE
OK	negbinomial.size	0.999999999678234	0.999999999678234	Gm26801	FALSE
OK	negbinomial.size	0.161548325856371	0.999999999678234	Zbtb18	FALSE
OK	negbinomial.size	0.999999999678234	0.999999999678234	Gm29856	FALSE
OK	negbinomial.size	0.999999999678234	0.999999999678234	Gm37306	FALSE
OK	negbinomial.size	0.999999999678234	0.999999999678234	Gm37280	FALSE
OK	negbinomial.size	0.999999999678234	0.999999999678234	2310043L19Rik	FALSE
OK	negbinomial.size	0.999999999678234	0.999999999678234	1700016C15Rik	FALSE
OK	negbinomial.size	5.77208830006914e-06	0.000753526264112264	Adss	TRUE
OK	negbinomial.size	0.999999999678234	0.999999999678234	Catspere1	FALSE
OK	negbinomial.size	0.999999999678234	0.999999999678234	Catspere2	FALSE
OK	negbinomial.size	0.776749360515028	0.999999999678234	Desi2	FALSE
OK	negbinomial.size	0.999999999678234	0.999999999678234	4930527J03Rik	FALSE
OK	negbinomial.size	0.999999999678234	0.999999999678234	B230369F24Rik	FALSE
OK	negbinomial.size	0.145005729920254	0.999999999678234	Cox20	FALSE
OK	negbinomial.size	0.00119354059229997	0.072341572178031	Hnrnpu	TRUE
OK	negbinomial.size	0.999999999442684	0.999999999678234	Efcab2	FALSE
OK	negbinomial.size	0.999999999678234	0.999999999678234	Kif26b	FALSE
OK	negbinomial.size	0.999999999678234	0.999999999678234	Gm16564	FALSE
OK	negbinomial.size	0.329372941557288	0.999999999678234	Smyd3	FALSE
OK	negbinomial.size	0.357750137302418	0.999999999678234	Tfb2m	FALSE
OK	negbinomial.size	0.686142588589866	0.999999999678234	Cnst	FALSE
OK	negbinomial.size	0.999999999678234	0.999999999678234	Sccpdh	FALSE
OK	negbinomial.size	0.999999999678234	0.999999999678234	Kif28	FALSE
OK	negbinomial.size	0.56725565717486	0.999999999678234	Ahctf1	FALSE
OK	negbinomial.size	0.999999999678234	0.999999999678234	Gm10518	FALSE
OK	negbinomial.size	0.999999999678234	0.999999999678234	Cdc42bpa	FALSE
OK	negbinomial.size	0.35775013730241	0.999999999678234	Coq8a	FALSE
OK	negbinomial.size	0.999999999678234	0.999999999678234	Gm37336	FALSE
OK	negbinomial.size	0.10666240583189	0.999999999678234	Psen2	FALSE
OK	negbinomial.size	0.999999999678234	0.999999999678234	Gm31728	FALSE
OK	negbinomial.size	0.489484991212378	0.999999999678234	Itpkb	TRUE
OK	negbinomial.size	0.999999999678234	0.999999999678234	Stum	FALSE
OK	negbinomial.size	0.999999999678234	0.999999999678234	Gm37267	FALSE
OK	negbinomial.size	0.161548428453342	0.999999999678234	Parp1	FALSE
OK	negbinomial.size	0.999999999442684	0.999999999678234	Lin9	FALSE
OK	negbinomial.size	0.999999999678234	0.999999999678234	Mixl1	FALSE
OK	negbinomial.size	0.983027131283752	0.999999999678234	Acbd3	TRUE
OK	negbinomial.size	0.999999999678234	0.999999999678234	Gm37768	FALSE
OK	negbinomial.size	0.357750137302396	0.999999999678234	Gm38293	FALSE
OK	negbinomial.size	0.10597222634247	0.999999999678234	H3f3a	TRUE
OK	negbinomial.size	0.999999999678234	0.999999999678234	H3f3aos	FALSE
OK	negbinomial.size	3.80917502119888e-05	0.00401394929929928	Sde2	TRUE
OK	negbinomial.size	0.999999999678234	0.999999999678234	Lefty2	FALSE
OK	negbinomial.size	0.853868088710934	0.999999999678234	Pycr2	FALSE
OK	negbinomial.size	0.999999999678234	0.999999999678234	Lefty1	FALSE
OK	negbinomial.size	0.00934260794715027	0.336927453353421	Tmem63a	FALSE
OK	negbinomial.size	0.999999999678234	0.999999999678234	2210411M09Rik	FALSE
OK	negbinomial.size	0.197326362681084	0.999999999678234	Ephx1	FALSE
OK	negbinomial.size	0.999999999678234	0.999999999678234	9130409I23Rik	FALSE
OK	negbinomial.size	0.999999999678234	0.999999999678234	Gm37406	FALSE
OK	negbinomial.size	0.180331983751526	0.999999999678234	Nvl	FALSE
OK	negbinomial.size	0.486429574607778	0.999999999678234	Cnih4	TRUE
OK	negbinomial.size	0.932439516012457	0.999999999678234	Wdr26	TRUE
OK	negbinomial.size	0.999999999678234	0.999999999678234	A430110L20Rik	FALSE
OK	negbinomial.size	0.999999999678234	0.999999999678234	Cnih3	FALSE
OK	negbinomial.size	0.999999999678234	0.999999999678234	Ccdc121	FALSE
OK	negbinomial.size	0.999999999678234	0.999999999678234	Dnah14	FALSE
OK	negbinomial.size	0.804770386172289	0.999999999678234	Lbr	TRUE
OK	negbinomial.size	0.999999999678234	0.999999999678234	Gm5533	FALSE
OK	negbinomial.size	0.999999999442684	0.999999999678234	Enah	FALSE
OK	negbinomial.size	0.569643474779427	0.999999999678234	Srp9	TRUE
OK	negbinomial.size	0.999999999678234	0.999999999678234	Vmn1r1	FALSE
OK	negbinomial.size	3.25479434223617e-08	6.77102216551002e-06	Degs1	TRUE
OK	negbinomial.size	9.80537776083629e-07	0.00015410200819658	1700047M11Rik	TRUE
OK	negbinomial.size	0.485352609935664	0.999999999678234	Fbxo28	TRUE
OK	negbinomial.size	0.989678374370655	0.999999999678234	Trp53bp2	FALSE
OK	negbinomial.size	0.357750137302401	0.999999999678234	Capn2	FALSE
OK	negbinomial.size	0.999999999678234	0.999999999678234	Gm37885	FALSE
OK	negbinomial.size	0.999999999678234	0.999999999678234	Capn8	FALSE
OK	negbinomial.size	0.999999999678234	0.999999999678234	Gm37218	FALSE
OK	negbinomial.size	0.999999999678234	0.999999999678234	Ccdc185	FALSE
OK	negbinomial.size	0.999999999678234	0.999999999678234	Susd4	FALSE
OK	negbinomial.size	0.535192495969939	0.999999999678234	Tlr5	FALSE
OK	negbinomial.size	0.999999999678234	0.999999999678234	Gm38079	FALSE
OK	negbinomial.size	0.35775013730242	0.999999999678234	Disp1	FALSE
OK	negbinomial.size	0.517198299701597	0.999999999678234	Brox	FALSE
OK	negbinomial.size	0.999999999442684	0.999999999678234	Aida	FALSE
OK	negbinomial.size	0.025564530176507	0.650750565022026	Mia3	TRUE
OK	negbinomial.size	0.999999999442684	0.999999999678234	Taf1a	FALSE
OK	negbinomial.size	0.999999999678234	0.999999999678234	Gm37986	FALSE
OK	negbinomial.size	0.999999999678234	0.999999999678234	Hhipl2	FALSE
OK	negbinomial.size	0.999999999678234	0.999999999678234	Gm37214	FALSE
OK	negbinomial.size	0.999999999678234	0.999999999678234	Gm33973	FALSE
OK	negbinomial.size	0.999999999678234	0.999999999678234	Gm34068	FALSE
OK	negbinomial.size	0.999999999678234	0.999999999678234	Gm38108	FALSE
OK	negbinomial.size	0.0590330206501197	0.999999999678234	Dusp10	FALSE
OK	negbinomial.size	0.357750137302412	0.999999999678234	1700056E22Rik	FALSE
OK	negbinomial.size	0.999999999678234	0.999999999678234	Gm37223	FALSE
OK	negbinomial.size	0.999999999678234	0.999999999678234	Gm37712	FALSE
OK	negbinomial.size	0.999999999678234	0.999999999678234	1700112H15Rik	FALSE
OK	negbinomial.size	0.999999999678234	0.999999999678234	Gm37800	FALSE
OK	negbinomial.size	0.999999999678234	0.999999999678234	4930488B22Rik	FALSE
OK	negbinomial.size	0.948049573075865	0.999999999678234	Hlx	TRUE
OK	negbinomial.size	0.0667594373351781	0.999999999678234	Gm34342	FALSE
OK	negbinomial.size	0.999999999678234	0.999999999678234	Marc1	FALSE
OK	negbinomial.size	0.0232769599050001	0.610712426474161	Marc2	FALSE
OK	negbinomial.size	0.999999999678234	0.999999999678234	C130074G19Rik	FALSE
OK	negbinomial.size	0.999999999678234	0.999999999678234	Mark1	FALSE
OK	negbinomial.size	0.999999999678234	0.999999999678234	Gm38251	FALSE
OK	negbinomial.size	0.999999999678234	0.999999999678234	Gm34732	FALSE
OK	negbinomial.size	0.999999999678234	0.999999999678234	4930433J02Rik	FALSE
OK	negbinomial.size	0.999999999678234	0.999999999678234	Gm37662	FALSE
OK	negbinomial.size	0.0986942792905523	0.999999999678234	Rab3gap2	FALSE
OK	negbinomial.size	0.999999999678234	0.999999999678234	Gm34882	FALSE
OK	negbinomial.size	0.999999999678234	0.999999999678234	Iars2	FALSE
OK	negbinomial.size	0.999999999678234	0.999999999678234	2010103J01Rik	FALSE
OK	negbinomial.size	0.821266687046128	0.999999999678234	Bpnt1	FALSE
OK	negbinomial.size	0.999999999678234	0.999999999678234	4930532G15Rik	FALSE
OK	negbinomial.size	0.757612389752543	0.999999999678234	Eprs	FALSE
OK	negbinomial.size	0.999999999678234	0.999999999678234	9630028B13Rik	FALSE
OK	negbinomial.size	0.999999999678234	0.999999999678234	Gm2061	FALSE
OK	negbinomial.size	0.999999999678234	0.999999999678234	Slc30a10	FALSE
OK	negbinomial.size	0.999999999678234	0.999999999678234	Gm38093	FALSE
OK	negbinomial.size	0.999999999678234	0.999999999678234	Lyplal1	FALSE
OK	negbinomial.size	0.999999999678234	0.999999999678234	Gm37134	FALSE
OK	negbinomial.size	0.999999999678234	0.999999999678234	A730004F24Rik	FALSE
OK	negbinomial.size	0.999999999678234	0.999999999678234	Tgfb2	FALSE
OK	negbinomial.size	0.999999999678234	0.999999999678234	Gm29491	FALSE
OK	negbinomial.size	0.999999999442684	0.999999999678234	Rrp15	FALSE
OK	negbinomial.size	0.511019290715257	0.999999999678234	A430105J06Rik	FALSE
OK	negbinomial.size	0.999999999678234	0.999999999678234	1700023G09Rik	FALSE
OK	negbinomial.size	0.999999999678234	0.999999999678234	Gm37912	FALSE
OK	negbinomial.size	0.999999999678234	0.999999999678234	D1Pas1	FALSE
OK	negbinomial.size	0.999999999678234	0.999999999678234	Spata17	FALSE
OK	negbinomial.size	0.999999999678234	0.999999999678234	Gm15509	FALSE
OK	negbinomial.size	0.999999999678234	0.999999999678234	1700007P06Rik	FALSE
OK	negbinomial.size	0.0917114518045445	0.999999999678234	Gpatch2	FALSE
OK	negbinomial.size	0.999999999678234	0.999999999678234	Gm38155	FALSE
OK	negbinomial.size	0.999999999678234	0.999999999678234	Gm37896	FALSE
OK	negbinomial.size	0.999999999678234	0.999999999678234	Esrrg	FALSE
OK	negbinomial.size	0.999999999678234	0.999999999678234	Gm36388	FALSE
OK	negbinomial.size	0.999999999678234	0.999999999678234	9330162B11Rik	FALSE
OK	negbinomial.size	0.999999999678234	0.999999999678234	Gm38064	FALSE
OK	negbinomial.size	0.999999999678234	0.999999999678234	Ush2a	FALSE
OK	negbinomial.size	0.268559528626976	0.999999999678234	Kctd3	FALSE
OK	negbinomial.size	0.999999999678234	0.999999999678234	Kcnk2	FALSE
OK	negbinomial.size	0.999999999678234	0.999999999678234	2900042K21Rik	FALSE
OK	negbinomial.size	0.999999999678234	0.999999999678234	A430027H14Rik	FALSE
OK	negbinomial.size	0.153731476406451	0.999999999678234	Cenpf	FALSE
OK	negbinomial.size	0.999999999678234	0.999999999678234	Ptpn14	FALSE
OK	negbinomial.size	0.999999999678234	0.999999999678234	Gm26574	FALSE
OK	negbinomial.size	0.999999999678234	0.999999999678234	Gm37422	FALSE
OK	negbinomial.size	0.999999999678234	0.999999999678234	Smyd2	FALSE
OK	negbinomial.size	0.999999999678234	0.999999999678234	Prox1	FALSE
OK	negbinomial.size	0.999999999678234	0.999999999678234	Gm28172	FALSE
OK	negbinomial.size	0.999999999678234	0.999999999678234	Prox1os	FALSE
OK	negbinomial.size	0.999999999678234	0.999999999678234	Gm29678	FALSE
OK	negbinomial.size	0.999999999678234	0.999999999678234	Gm30725	FALSE
OK	negbinomial.size	0.999999999678234	0.999999999678234	Gm30932	FALSE
OK	negbinomial.size	0.0958559394766925	0.999999999678234	Rps6kc1	FALSE
OK	negbinomial.size	0.311836128711882	0.999999999678234	Angel2	FALSE
OK	negbinomial.size	0.999999999442684	0.999999999678234	Vash2	FALSE
OK	negbinomial.size	0.999999999678234	0.999999999678234	Gm31373	FALSE
OK	negbinomial.size	0.114359523654919	0.999999999678234	Flvcr1	TRUE
OK	negbinomial.size	0.999999999678234	0.999999999678234	A230020J21Rik	FALSE
OK	negbinomial.size	0.999999999678234	0.999999999678234	Spata45	FALSE
OK	negbinomial.size	0.153731476406452	0.999999999678234	Tatdn3	FALSE
OK	negbinomial.size	0.197326362681085	0.999999999678234	Nsl1	FALSE
OK	negbinomial.size	0.999999999678234	0.999999999678234	Gm38188	FALSE
OK	negbinomial.size	0.999999999442684	0.999999999678234	Batf3	FALSE
OK	negbinomial.size	0.999999999678234	0.999999999678234	Gm38161	FALSE
OK	negbinomial.size	0.999999999678234	0.999999999678234	Fam71a	FALSE
OK	negbinomial.size	1.98720850104161e-18	1.64301379784837e-15	Atf3	TRUE
OK	negbinomial.size	0.865207193691361	0.999999999678234	D730003I15Rik	FALSE
OK	negbinomial.size	4.51106461190517e-05	0.00460314172186336	Gm37168	FALSE
OK	negbinomial.size	0.999999999442684	0.999999999678234	Nenf	FALSE
OK	negbinomial.size	0.0766526605799858	0.999999999678234	Pacc1	FALSE
OK	negbinomial.size	0.119737721815572	0.999999999678234	Ppp2r5a	TRUE
OK	negbinomial.size	0.999999999678234	0.999999999678234	Gm32200	FALSE
OK	negbinomial.size	0.999999999678234	0.999999999678234	Gm37432	FALSE
OK	negbinomial.size	0.999999999678234	0.999999999678234	Dtl	FALSE
OK	negbinomial.size	0.999999999678234	0.999999999678234	Ints7	FALSE
OK	negbinomial.size	0.193518004233875	0.999999999678234	Lpgat1	TRUE
OK	negbinomial.size	0.999999999678234	0.999999999678234	Gm38037	FALSE
OK	negbinomial.size	0.999999999678234	0.999999999678234	Nek2	FALSE
OK	negbinomial.size	0.357750137302411	0.999999999678234	1700034H15Rik	FALSE
OK	negbinomial.size	0.830001420695901	0.999999999678234	Slc30a1	FALSE
OK	negbinomial.size	0.100556492399747	0.999999999678234	Rd3	FALSE
OK	negbinomial.size	0.999999999442684	0.999999999678234	Gm26670	FALSE
OK	negbinomial.size	0.872591670528484	0.999999999678234	Traf5	FALSE
OK	negbinomial.size	0.999999999678234	0.999999999678234	Gm26879	FALSE
OK	negbinomial.size	0.999999999678234	0.999999999678234	Rcor3	FALSE
OK	negbinomial.size	0.999999999678234	0.999999999678234	Gm10516	FALSE
OK	negbinomial.size	0.999999999678234	0.999999999678234	Kcnh1	FALSE
OK	negbinomial.size	0.999999999678234	0.999999999678234	Hhat	FALSE
OK	negbinomial.size	0.999999999678234	0.999999999678234	1700065J18Rik	FALSE
OK	negbinomial.size	0.999999999678234	0.999999999678234	Sertad4	FALSE
OK	negbinomial.size	0.999999999678234	0.999999999678234	Gm15867	FALSE
OK	negbinomial.size	0.999999999678234	0.999999999678234	Syt14	FALSE
OK	negbinomial.size	0.999999999678234	0.999999999678234	Gm31406	FALSE
OK	negbinomial.size	0.999999999678234	0.999999999678234	Utp25	FALSE
OK	negbinomial.size	0.999999999678234	0.999999999678234	Irf6	FALSE
OK	negbinomial.size	0.0428964875918757	0.873231687988217	A130010J15Rik	FALSE
OK	negbinomial.size	0.716689228509215	0.999999999678234	Traf3ip3	TRUE
OK	negbinomial.size	0.999999999678234	0.999999999678234	Gm15872	FALSE
OK	negbinomial.size	0.153731476406456	0.999999999678234	4930570N18Rik	FALSE
OK	negbinomial.size	0.384245312922374	0.999999999678234	Lamb3	FALSE
OK	negbinomial.size	7.37314915720926e-12	2.67131679296868e-09	Hsd11b1	TRUE
OK	negbinomial.size	4.81803094156016e-06	0.000644636546517044	G0s2	TRUE
OK	negbinomial.size	0.999999999678234	0.999999999678234	Gm37650	FALSE
OK	negbinomial.size	0.999999999678234	0.999999999678234	Camk1g	FALSE
OK	negbinomial.size	0.999999999678234	0.999999999678234	Mir205hg	FALSE
OK	negbinomial.size	0.999999999678234	0.999999999678234	4930503O07Rik	FALSE
OK	negbinomial.size	0.999999999678234	0.999999999678234	Plxna2	FALSE
OK	negbinomial.size	0.999999999678234	0.999999999678234	Cd34	FALSE
OK	negbinomial.size	0.190342605080061	0.999999999678234	Gm16897	FALSE
OK	negbinomial.size	0.529384321088512	0.999999999678234	A330023F24Rik	FALSE
OK	negbinomial.size	0.999999999678234	0.999999999678234	Gm32250	FALSE
OK	negbinomial.size	0.999999999678234	0.999999999678234	Gm37027	FALSE
OK	negbinomial.size	0.865207193691378	0.999999999678234	Cd46	FALSE
OK	negbinomial.size	0.111272081178017	0.999999999678234	Cr1l	TRUE
OK	negbinomial.size	0.999999999678234	0.999999999678234	Cr2	FALSE
OK	negbinomial.size	0.999999999678234	0.999999999678234	Fam171a1	FALSE
OK	negbinomial.size	0.153731476406451	0.999999999678234	Nmt2	FALSE
OK	negbinomial.size	0.999999999678234	0.999999999678234	Rpp38	FALSE
OK	negbinomial.size	0.999999999678234	0.999999999678234	Acbd7	FALSE
OK	negbinomial.size	0.999999999678234	0.999999999678234	Olah	FALSE
OK	negbinomial.size	0.999999999678234	0.999999999678234	Gm37525	FALSE
OK	negbinomial.size	0.268559528626972	0.999999999678234	Meig1	FALSE
OK	negbinomial.size	0.0158685441100007	0.475098611724209	Dclre1c	TRUE
OK	negbinomial.size	0.999999999678234	0.999999999678234	Suv39h2	FALSE
OK	negbinomial.size	0.999999999678234	0.999999999678234	Gm13184	FALSE
OK	negbinomial.size	0.112616803648415	0.999999999678234	Hspa14	TRUE
OK	negbinomial.size	0.357750137302411	0.999999999678234	Gm45902	FALSE
OK	negbinomial.size	0.153731476406452	0.999999999678234	Cdnf	FALSE
OK	negbinomial.size	0.524108653966361	0.999999999678234	Fam107b	TRUE
OK	negbinomial.size	0.999999999678234	0.999999999678234	Gm13185	FALSE
OK	negbinomial.size	0.999999999678234	0.999999999678234	Gm13180	FALSE
OK	negbinomial.size	0.999999999678234	0.999999999678234	Gm13191	FALSE
OK	negbinomial.size	0.999999999678234	0.999999999678234	Frmd4a	FALSE
OK	negbinomial.size	0.999999999678234	0.999999999678234	Gm10862	FALSE
OK	negbinomial.size	0.999999999678234	0.999999999678234	Gm38085	FALSE
OK	negbinomial.size	0.999999999678234	0.999999999678234	1700080N15Rik	FALSE
OK	negbinomial.size	0.999999999678234	0.999999999678234	Gm13189	FALSE
OK	negbinomial.size	0.999999999678234	0.999999999678234	Gm37814	FALSE
OK	negbinomial.size	0.999999999678234	0.999999999678234	Gm37107	FALSE
OK	negbinomial.size	0.999999999678234	0.999999999678234	Gm38348	FALSE
OK	negbinomial.size	0.999999999678234	0.999999999678234	Gm13187	FALSE
OK	negbinomial.size	0.999999999678234	0.999999999678234	Gm36988	FALSE
OK	negbinomial.size	0.999999999678234	0.999999999678234	Gm13175	FALSE
OK	negbinomial.size	0.999999999442684	0.999999999678234	Gm13179	FALSE
OK	negbinomial.size	0.611011272420943	0.999999999678234	Prpf18	TRUE
OK	negbinomial.size	0.999999999678234	0.999999999678234	Bend7	FALSE
OK	negbinomial.size	0.999999999109069	0.999999999678234	Sephs1	FALSE
OK	negbinomial.size	0.0258013488123788	0.654060135577952	Phyh	TRUE
OK	negbinomial.size	0.999999999678234	0.999999999678234	Ucma	FALSE
OK	negbinomial.size	0.153731476406455	0.999999999678234	Mcm10	FALSE
OK	negbinomial.size	0.0341854949232352	0.764432235644742	Optn	TRUE
OK	negbinomial.size	0.999999999678234	0.999999999678234	4930551O13Rik	FALSE
OK	negbinomial.size	0.999999999678234	0.999999999678234	Ccdc3	FALSE
OK	negbinomial.size	0.0040332639336753	0.182915042955499	Camk1d	TRUE
OK	negbinomial.size	0.00436977426128114	0.193283087866955	Cdc123	FALSE
OK	negbinomial.size	0.309374736834636	0.999999999678234	Nudt5	FALSE
OK	negbinomial.size	0.999999999678234	0.999999999678234	Gm13199	FALSE
OK	negbinomial.size	0.0667594373351779	0.999999999678234	Sec61a2	FALSE
OK	negbinomial.size	0.999999999678234	0.999999999678234	Gm13267	FALSE
OK	negbinomial.size	0.999999999678234	0.999999999678234	Dhtkd1	FALSE
OK	negbinomial.size	0.688930310729953	0.999999999678234	Upf2	TRUE
OK	negbinomial.size	0.999999999678234	0.999999999678234	Proser2	FALSE
OK	negbinomial.size	0.999999999678234	0.999999999678234	Gm10857	FALSE
OK	negbinomial.size	0.0255698432629458	0.650750565022026	Echdc3	FALSE
OK	negbinomial.size	0.999999999678234	0.999999999678234	A230108P19Rik	FALSE
OK	negbinomial.size	0.999999999678234	0.999999999678234	Gm13383	FALSE
OK	negbinomial.size	0.999999999678234	0.999999999678234	AL845275.1	FALSE
OK	negbinomial.size	0.243094637345801	0.999999999678234	Usp6nl	FALSE
OK	negbinomial.size	0.999999999442684	0.999999999678234	Gm13388	FALSE
OK	negbinomial.size	0.999999999678234	0.999999999678234	Gm13391	FALSE
OK	negbinomial.size	0.162520996612379	0.999999999678234	Celf2	TRUE
OK	negbinomial.size	0.999999999678234	0.999999999678234	Gm13389	FALSE
OK	negbinomial.size	0.999999999678234	0.999999999678234	Gm10855	FALSE
OK	negbinomial.size	0.999999999678234	0.999999999678234	Gm10115	FALSE
OK	negbinomial.size	0.999999999678234	0.999999999678234	Gm28641	FALSE
OK	negbinomial.size	0.999999999678234	0.999999999678234	Gm13211	FALSE
OK	negbinomial.size	0.999999999678234	0.999999999678234	1700061F12Rik	FALSE
OK	negbinomial.size	0.999999999678234	0.999999999678234	Gm13219	FALSE
OK	negbinomial.size	0.999999999678234	0.999999999678234	Gm13218	FALSE
OK	negbinomial.size	0.180331983751526	0.999999999678234	Gata3	FALSE
OK	negbinomial.size	0.999999999678234	0.999999999678234	Gm13256	FALSE
OK	negbinomial.size	0.999999999678234	0.999999999678234	4930412O13Rik	FALSE
OK	negbinomial.size	0.999999999678234	0.999999999678234	9230102O04Rik	FALSE
OK	negbinomial.size	0.999999999678234	0.999999999678234	Gm13262	FALSE
OK	negbinomial.size	0.180331983751533	0.999999999678234	Taf3	FALSE
OK	negbinomial.size	0.34933499375108	0.999999999678234	Atp5c1	TRUE
OK	negbinomial.size	0.107278647364843	0.999999999678234	Kin	TRUE
OK	negbinomial.size	0.999999999678234	0.999999999678234	Itih2	FALSE
OK	negbinomial.size	0.153731476406452	0.999999999678234	Itih5	FALSE
OK	negbinomial.size	0.999999999678234	0.999999999678234	Gm13261	FALSE
OK	negbinomial.size	0.872591670528431	0.999999999678234	Sfmbt2	FALSE
OK	negbinomial.size	0.999999999678234	0.999999999678234	Gm13264	FALSE
OK	negbinomial.size	0.76790866255202	0.999999999678234	Prkcq	FALSE
OK	negbinomial.size	0.357750137302405	0.999999999678234	Gm38171	FALSE
OK	negbinomial.size	0.999999999678234	0.999999999678234	8030442B05Rik	FALSE
OK	negbinomial.size	0.999999999678234	0.999999999678234	Gm13293	FALSE
OK	negbinomial.size	0.999999999678234	0.999999999678234	Gm13291	FALSE
OK	negbinomial.size	0.427568109461595	0.999999999678234	Pfkfb3	TRUE
OK	negbinomial.size	0.0667594373351775	0.999999999678234	Gm10851	FALSE
OK	negbinomial.size	0.506940206389159	0.999999999678234	Rbm17	TRUE
OK	negbinomial.size	0.999999999678234	0.999999999678234	Gm17490	FALSE
OK	negbinomial.size	0.999999999678234	0.999999999678234	Il2ra	FALSE
OK	negbinomial.size	0.115356171133647	0.999999999678234	Il15ra	FALSE
OK	negbinomial.size	0.51301613233019	0.999999999678234	Fbh1	FALSE
OK	negbinomial.size	0.531034747688365	0.999999999678234	Ankrd16	FALSE
OK	negbinomial.size	0.999999999678234	0.999999999678234	Itga8	FALSE
OK	negbinomial.size	0.999999999678234	0.999999999678234	E030013I19Rik	FALSE
OK	negbinomial.size	0.382838951975125	0.999999999678234	Mindy3	TRUE
OK	negbinomial.size	0.999999999678234	0.999999999678234	Gm37565	FALSE
OK	negbinomial.size	0.999999999678234	0.999999999678234	Pter	FALSE
OK	negbinomial.size	0.999999999678234	0.999999999678234	C1ql3	FALSE
OK	negbinomial.size	0.00179610332173124	0.0983282709834021	Rsu1	TRUE
OK	negbinomial.size	0.999999999442684	0.999999999678234	Gm13270	FALSE
OK	negbinomial.size	0.999999999678234	0.999999999678234	Cubn	FALSE
OK	negbinomial.size	0.111765610288394	0.999999999678234	Trdmt1	FALSE
OK	negbinomial.size	0.00242075467732074	0.125493946254353	Vim	TRUE
OK	negbinomial.size	0.357750137302401	0.999999999678234	St8sia6	FALSE
OK	negbinomial.size	0.999999999678234	0.999999999678234	Gm37126	FALSE
OK	negbinomial.size	0.999999999678234	0.999999999678234	Hacd1	FALSE
OK	negbinomial.size	0.999999999678234	0.999999999678234	Stamos	FALSE
OK	negbinomial.size	0.055870674676273	0.99864382181283	Stam	FALSE
OK	negbinomial.size	0.999999999678234	0.999999999678234	Tmem236	FALSE
OK	negbinomial.size	0.999999999678234	0.999999999678234	Mrc1	FALSE
OK	negbinomial.size	0.999999999678234	0.999999999678234	Slc39a12	FALSE
OK	negbinomial.size	0.999999999678234	0.999999999678234	Gm13266	FALSE
OK	negbinomial.size	0.999999999678234	0.999999999678234	Cacnb2	FALSE
OK	negbinomial.size	0.999999999678234	0.999999999678234	Gm10848	FALSE
OK	negbinomial.size	0.999999999678234	0.999999999678234	Gm13269	FALSE
OK	negbinomial.size	0.330128392754974	0.999999999678234	Nsun6	FALSE
OK	negbinomial.size	0.0537517711140301	0.978670728160305	Arl5b	TRUE
OK	negbinomial.size	0.999999999678234	0.999999999678234	Malrd1	FALSE
OK	negbinomial.size	0.999999999678234	0.999999999678234	Plxdc2	FALSE
OK	negbinomial.size	0.999999999678234	0.999999999678234	Gm13322	FALSE
OK	negbinomial.size	0.165265633742141	0.999999999678234	Nebl	FALSE
OK	negbinomial.size	0.999999999678234	0.999999999678234	Gm13324	FALSE
OK	negbinomial.size	0.999999999678234	0.999999999678234	H2al2a	FALSE
OK	negbinomial.size	0.999999999678234	0.999999999678234	A930004D18Rik	FALSE
OK	negbinomial.size	0.999999999678234	0.999999999678234	Gm13330	FALSE
OK	negbinomial.size	0.999999999678234	0.999999999678234	Skida1	FALSE
OK	negbinomial.size	0.999999999678234	0.999999999678234	1810059C17Rik	FALSE
OK	negbinomial.size	0.00116177843958193	0.0708157765299042	Mllt10	TRUE
OK	negbinomial.size	0.303505841865159	0.999999999678234	Dnajc1	FALSE
OK	negbinomial.size	0.239070075842476	0.999999999678234	Commd3	FALSE
OK	negbinomial.size	0.318591840362362	0.999999999678234	Bmi1	FALSE
OK	negbinomial.size	0.999999999678234	0.999999999678234	Spag6	FALSE
OK	negbinomial.size	0.999999999678234	0.999999999678234	Gm20539	FALSE
OK	negbinomial.size	0.999999999678234	0.999999999678234	Carlr	FALSE
OK	negbinomial.size	0.0470857306463069	0.922405458499493	Pip4k2a	TRUE
OK	negbinomial.size	0.999999999678234	0.999999999678234	4930426L09Rik	FALSE
OK	negbinomial.size	0.738078199267894	0.999999999678234	Armc3	FALSE
OK	negbinomial.size	0.999999999678234	0.999999999678234	4930447M23Rik	FALSE
OK	negbinomial.size	0.0479918191990378	0.92998773762846	Msrb2	FALSE
OK	negbinomial.size	0.999999999678234	0.999999999678234	Gm33940	FALSE
OK	negbinomial.size	0.999999999678234	0.999999999678234	Gm13344	FALSE
OK	negbinomial.size	0.999999999678234	0.999999999678234	Ptf1aos	FALSE
OK	negbinomial.size	0.999999999678234	0.999999999678234	Ptf1a	FALSE
OK	negbinomial.size	0.999999999678234	0.999999999678234	1810010K12Rik	FALSE
OK	negbinomial.size	0.999999999678234	0.999999999678234	4921504E06Rik	FALSE
OK	negbinomial.size	0.999999999678234	0.999999999678234	Gm13348	FALSE
OK	negbinomial.size	0.176897317582393	0.999999999678234	Otud1	FALSE
OK	negbinomial.size	0.999999999678234	0.999999999678234	Gm13346	FALSE
OK	negbinomial.size	0.999999999678234	0.999999999678234	Etl4	FALSE
OK	negbinomial.size	0.999999999678234	0.999999999678234	Gm17171	FALSE
OK	negbinomial.size	0.999999999678234	0.999999999678234	Gm13335	FALSE
OK	negbinomial.size	0.999999999678234	0.999999999678234	Gm13362	FALSE
OK	negbinomial.size	0.999999999678234	0.999999999678234	Arhgap21	FALSE
OK	negbinomial.size	0.999999999678234	0.999999999678234	Gm13380	FALSE
OK	negbinomial.size	0.999999999678234	0.999999999678234	Gm13375	FALSE
OK	negbinomial.size	0.999999999678234	0.999999999678234	Gm13376	FALSE
OK	negbinomial.size	0.999999999678234	0.999999999678234	Enkur	FALSE
OK	negbinomial.size	0.999999999678234	0.999999999678234	Thnsl1	FALSE
OK	negbinomial.size	0.999999999678234	0.999999999678234	Gm13327	FALSE
OK	negbinomial.size	0.999999999678234	0.999999999678234	Gpr158	FALSE
OK	negbinomial.size	0.999999999678234	0.999999999678234	Myo3a	FALSE
OK	negbinomial.size	0.999999999678234	0.999999999678234	Gad2	FALSE
OK	negbinomial.size	0.999999999678234	0.999999999678234	1700092C17Rik	FALSE
OK	negbinomial.size	0.00816405023982961	0.308847634578009	Apbb1ip	TRUE
OK	negbinomial.size	0.32937294155729	0.999999999678234	Pdss1	FALSE
OK	negbinomial.size	0.574063262659384	0.999999999678234	Abi1	TRUE
OK	negbinomial.size	0.980822474946524	0.999999999678234	Acbd5	TRUE
OK	negbinomial.size	0.999999999678234	0.999999999678234	Mastl	FALSE
OK	negbinomial.size	0.555858436722608	0.999999999678234	Yme1l1	TRUE
OK	negbinomial.size	0.999999999678234	0.999999999678234	4931423N10Rik	FALSE
OK	negbinomial.size	0.999999999678234	0.999999999678234	Nxph2	FALSE
OK	negbinomial.size	0.35775013730241	0.999999999678234	Spopl	FALSE
OK	negbinomial.size	0.273921001439627	0.999999999678234	Hnmt	TRUE
OK	negbinomial.size	0.999999999678234	0.999999999678234	Tbpl2	FALSE
OK	negbinomial.size	0.999999999678234	0.999999999678234	Il1f8	FALSE
OK	negbinomial.size	0.398285655467089	0.999999999678234	Il1f9	TRUE
OK	negbinomial.size	0.999999999678234	0.999999999678234	Il1f6	FALSE
OK	negbinomial.size	0.999999999678234	0.999999999678234	Il1f5	FALSE
OK	negbinomial.size	0.999999999678234	0.999999999678234	Il1f10	FALSE
OK	negbinomial.size	0.999999999678234	0.999999999678234	Gm13411	FALSE
OK	negbinomial.size	1.00235937124753e-23	1.34671158024485e-20	Il1rn	TRUE
OK	negbinomial.size	0.684778628103409	0.999999999678234	Psd4	TRUE
OK	negbinomial.size	0.999999998712934	0.999999999678234	Pax8	FALSE
OK	negbinomial.size	0.999999999678234	0.999999999678234	Gm13415	FALSE
OK	negbinomial.size	0.999999999678234	0.999999999678234	Gm13417	FALSE
OK	negbinomial.size	0.999999999678234	0.999999999678234	Cacna1b	FALSE
OK	negbinomial.size	0.460575701147396	0.999999999678234	Ehmt1	FALSE
OK	negbinomial.size	0.185467473577246	0.999999999678234	Arrdc1	FALSE
OK	negbinomial.size	0.999999999442684	0.999999999678234	Zmynd19	FALSE
OK	negbinomial.size	0.999999999678234	0.999999999678234	Dph7	FALSE
OK	negbinomial.size	0.990182112485589	0.999999999678234	Mrpl41	FALSE
OK	negbinomial.size	0.116158146056177	0.999999999678234	Pnpla7	TRUE
OK	negbinomial.size	0.0464068330429165	0.919804735858044	Nsmf	FALSE
OK	negbinomial.size	0.999999999678234	0.999999999678234	Entpd8	FALSE
OK	negbinomial.size	0.999999999678234	0.999999999678234	Noxa1	FALSE
OK	negbinomial.size	0.999999999678234	0.999999999678234	Gm13387	FALSE
OK	negbinomial.size	0.999999999678234	0.999999999678234	Nrarp	FALSE
OK	negbinomial.size	0.999999999678234	0.999999999678234	Gm38287	FALSE
OK	negbinomial.size	0.329372941557292	0.999999999678234	Tor4a	FALSE
OK	negbinomial.size	0.306105320934374	0.999999999678234	Nelfb	TRUE
OK	negbinomial.size	0.999999999678234	0.999999999678234	Stpg3	FALSE
OK	negbinomial.size	0.999999999678234	0.999999999678234	Fam166a	FALSE
OK	negbinomial.size	0.199346337697546	0.999999999678234	Tubb4b	TRUE
OK	negbinomial.size	0.999999999678234	0.999999999678234	Slc34a3	FALSE
OK	negbinomial.size	0.999999999678234	0.999999999678234	Rnf224	FALSE
OK	negbinomial.size	0.999999999678234	0.999999999678234	Cysrt1	FALSE
OK	negbinomial.size	0.999999999678234	0.999999999678234	Rnf208	FALSE
[truncated: 30,246 more rows]
