# Supplementary material for: Single-Cell Transcriptomic Profiles of Lung Pre-Metastatic Niche Reveal Neutrophil and Lymphatic Endothelial Cell Roles in Breast Cancer
Source: Cancers (Basel). 2022 Dec 28;15(1):176. doi: 10.3390/cancers15010176 (PMC9818165; doi:10.3390/cancers15010176)
Supplement: Supplementary file 1 [file cancers-15-00176-s001.zip › Table S7.csv]

gene_name	module	color	kME_M1	kME_M2	kME_grey	kME_M3	kME_M4	kME_M5	kME_M6	kME_M7	kME_M8	kME_M9	kME_M10
Ltf	grey	grey	-0.264697863956776	-0.0685524180100706	-0.014531826013997	-0.039209073440573	0.123592232002406	0.261734087890087	0.206063062869098	-0.0138712268929784	0.11107539594997	0.233866037867319	0.131715022092165
Camp	M7	turquoise	-0.246899187439577	-0.055622505250652	-0.0144443597099486	-0.0261442418623431	0.110891846928247	0.226924197506473	0.17835570244145	-0.0125318147449819	0.0917911609739237	0.198414780755731	0.106195874786031
Ngp	M7	turquoise	-0.285069031387619	-0.0972040703399422	-0.0423136058337933	-0.0642931952565638	0.120549894346927	0.258358958123692	0.230602018950083	-0.00815002124512042	0.139155951811823	0.248352848430089	0.157369723689016
Saa3	M9	blue	0.0764411136921182	-0.00303409465665074	-0.104819777951874	0.017750825201188	-0.00114187241509098	0.0709370222513004	0.097961813640648	-0.0643824907418679	-0.0603297148259114	0.136273919488536	0.0982820949276594
Lyz2	M7	turquoise	-0.160381176869154	0.0241711592573981	-0.127477033443024	-0.130878392916079	-0.0482651920180142	0.0950540974952886	0.0788394108422308	0.434897867715512	0.10410261799655	-0.10112534582318	-0.0232232649292714
Chil3	M7	turquoise	-0.20386808587845	-0.044529592522499	-0.0088718203839563	-0.015339359490638	0.0644311238687754	0.167443023456329	0.108826656382937	-0.00867274083912329	0.0466344665057699	0.123145649333262	0.0672640882965054
Lcn2	M7	turquoise	-0.329602832458152	-0.129032984283568	-0.0864120352847262	-0.101219331808916	0.149269663765808	0.312510406964262	0.254301011129134	0.0382743369152702	0.179138487454691	0.255774510217346	0.185652018985136
Cybb	M7	turquoise	-0.264299955341383	-0.0820543627196618	-0.0351550547009474	-0.0547058967646929	0.105364883461063	0.268706910553917	0.198785155255379	-0.00405631982358948	0.112179892875373	0.217636718787812	0.132833015205011
Stfa3	M7	turquoise	-0.111512687091894	-0.0577416347567062	-0.0989877338264301	-0.0680564546098541	0.0519550514642307	0.0841198782452729	0.0828118136913928	0.0652957682226433	0.000160459570041833	0.0456627010287168	0.0403608131171492
Ifitm6	M7	turquoise	-0.350966488748421	-0.199790544359863	-0.125718583948161	-0.152715139802066	0.145584673225644	0.326354828965341	0.295677686022111	0.0537707931646752	0.222707770078972	0.283948711118091	0.247559058361538
Cxcl1	M1	yellow	0.207415998052803	-0.0437574730260695	-0.0369140620965503	0.0171579064858189	0.0116126566197423	0.000214911634099946	0.0307501170625166	0.00674398081115085	0.0482967557039733	0.053665928788921	-0.0126836079515255
Cstdc5	M7	turquoise	-0.225965903396718	-0.095182842596382	-0.146599128522192	-0.112668841315823	0.0544495894166351	0.164171202529936	0.14951426989495	0.184329962484336	0.0711801706649639	0.0991103073692992	0.0885131524234263
Stfa2	M7	turquoise	-0.144110131758682	-0.0704966280494066	-0.133438053040067	-0.0961100077818299	0.0726171059368069	0.107152426823095	0.0735847685551782	0.189806093773606	0.00224808453388698	0.037034590523555	0.0177897818437325
Spp1	M8	brown	-0.0468337383877599	-0.0563502400537662	-0.0395559443126613	0.0071954769744239	-0.0394746672735357	0.0499665791248495	0.0773792950174987	0.0344671075389589	0.151475678718114	0.0377860380274102	0.0553039715537175
Ccl4	M8	brown	0.0453263236089245	-0.015556566772155	-0.0467318092395772	-0.0403306998927704	-0.0128521977776892	0.000572101898705965	-0.0072824917958821	0.0992993082256277	0.0110186288940871	-0.0362963560349706	-0.0177345810820066
mt-Nd1	M6	green	0.0545937662050951	-0.0372335308165037	-0.122286839160569	-0.0396538733266182	-0.000373832369435425	0.104495827506112	0.341302964657091	0.0510256337540133	0.106660947295102	0.0929737418511649	0.0847857878877244
Olfm4	M7	turquoise	-0.0854513921340678	-0.0210447819514145	-0.0331900464643441	-0.035898282957245	0.0448988861596038	0.128346510674046	0.0551471134729697	0.014614273367057	0.037137284347774	0.0505906382623148	0.0153532548918622
Anxa1	M7	turquoise	-0.125960910290367	-0.071364124097405	-0.172482038619648	-0.13857050447097	0.0244168973631984	0.204691561481872	0.089792388142233	0.426534258588922	0.092529783610788	-0.0152892031034387	0.00241567052801178
Serpinb1a	M7	turquoise	-0.262585035283492	-0.0839656563096155	-0.0378195315628171	-0.0507297000495497	0.118880603160384	0.233721927822669	0.196077393613192	-0.00163579887695739	0.114313160435649	0.207548849020669	0.135472255405114
mt-Nd2	M6	green	0.055644615681598	-0.0280439686481059	-0.118496375027628	-0.0302521143097925	0.00845870170392219	0.0674401136487768	0.328791192908328	0.032382842673912	0.0903814569269258	0.0850325801365026	0.0714344297822466
mt-Atp6	M6	green	-0.0928142954304577	-0.0827502264434742	-0.307143310430231	-0.145229359612098	0.00356250080662718	0.237291806560599	0.422065723918596	0.218205616473932	0.221928830320757	0.234764829763163	0.208049896524492
Cd177	M7	turquoise	-0.334359515754561	-0.16549328164521	-0.108830317641329	-0.12053701916939	0.160830593669023	0.311890588574495	0.264094666426726	0.0271289336293535	0.21509377622648	0.271716366030201	0.21348018127297
Prok2	M7	turquoise	-0.271097199361838	-0.181235529415497	-0.308117697589359	-0.173991755585519	0.0809999559877674	0.221769071449379	0.180875478720047	0.227439670518479	0.194818072288097	0.135030855666389	0.177370970624796
Ly6c2	M7	turquoise	-0.322621088324752	-0.170573901596753	-0.106751093482845	-0.133151088177726	0.123065414712766	0.290710316484528	0.259659630466855	0.0463436329075105	0.206094036155267	0.258039658815834	0.208122825259933
Csf3	grey	grey	-0.0127037688965178	0.0330016438072262	-0.0814462318098041	-0.00164779262682302	-0.0103739687939135	0.0313792532111549	0.0495032078071947	0.0325185664998746	0.0472501790540602	0.0555808926481478	0.032865016499423
Cstdc4	M7	turquoise	-0.14820085170705	-0.0687855710283863	-0.13516104516788	-0.131807661691217	0.0181089619167171	0.0916281364966985	0.0560951514821577	0.23770160800851	0.031926761697356	-0.00832901982931496	0.00108793835590131
mt-Co3	M6	green	-0.0522856321699045	-0.130698483443058	-0.304122099778851	-0.124963345127517	0.0541013884427862	0.25754140031958	0.338970522688516	0.271346861544457	0.16495314674137	0.231806571649006	0.162305144524255
Aldh2	M7	turquoise	-0.30971980839749	-0.140734065909778	-0.0976059503649253	-0.118406350795238	0.156945753065274	0.323682814762096	0.249411452436986	0.0579325595509141	0.221342233466808	0.247935451379912	0.191081461627935
Hba-a1	M4	pink	-0.0625229837326668	0.0561251428726635	0.0629177328472388	0.050722567460326	-0.0183838518028256	-0.0145813039177932	-0.0240648112344229	-0.0754748603298676	-0.0619438833647043	-0.0217610075963395	-0.0254208910100163
Hbb-bs	M4	pink	-0.0654888304260016	0.0529344406621791	0.0667379232109017	0.0478706814643553	-0.0173402820197122	-0.0185070037144147	-0.0334235656291132	-0.0722338152975033	-0.0616690895417229	-0.0300364987700731	-0.0281039653990901
Orm1	M3	black	-0.15372226846133	-0.0276459178867446	-0.0126877195010281	0.00819898466719267	0.0522909830875343	0.136948561633882	0.072804591439391	0.00156141110291172	0.0187219542610669	0.0856346207552807	0.0475339943873925
Lgals3	M7	turquoise	-0.373011806057781	-0.192438765583294	-0.150157135282451	-0.156040647751494	0.166637749761625	0.326460898727471	0.285741560286948	0.10274164206582	0.25149746172092	0.260347766791072	0.230167821133479
mt-Cytb	M6	green	0.0297530680801703	-0.0758600119614958	-0.166375344905224	-0.0655067338343551	0.0196682628603354	0.155417443573794	0.417560996431824	0.0735581259417157	0.1238768891763	0.125778220248298	0.114024146594744
Mmp8	M7	turquoise	-0.342747010681416	-0.236902557724543	-0.208965817476491	-0.21340826968947	0.131437576347904	0.325307774077967	0.32572961777993	0.1328911582163	0.279107866764909	0.278934835595945	0.291587486377537
Retnlg	M7	turquoise	-0.23061849344935	-0.0245253529137034	-0.0428292341966044	-0.120015462806161	-0.0010430953284878	0.0910462144425619	0.0340141366437002	0.498311363528521	0.0624949149678049	-0.100160938102779	-0.0763350097080542
Ly6g	M7	turquoise	-0.341806472639888	-0.198772219752649	-0.18293429808691	-0.177876079740265	0.0783297617518679	0.332378346097873	0.267702031226829	0.145374188396229	0.233007806278569	0.23798088647532	0.216357707703951
Ifi27l2a	M2	magenta	-0.0390066982176096	-0.0640050212841453	-0.0834555536262359	-0.0589220291410751	0.0277064203864766	0.0919618026094457	0.0424508358101706	0.0930591078934547	0.0790418984155494	0.0141651371025171	0.0871782960455758
AA467197	M7	turquoise	-0.277505389373045	-0.124600091062642	-0.121579191812085	-0.110698511790479	0.119330187977199	0.278795256681627	0.249894970474348	0.049091592527017	0.181275980832638	0.252706276195593	0.210818895102226
Anxa3	M7	turquoise	-0.294731513665636	-0.113443084462549	-0.0405879647403105	-0.0617064688801546	0.116970146266666	0.26204058653355	0.217621805303889	0.00152526474159922	0.143907313848148	0.227094872218576	0.15390090495763
Arhgdib	M7	turquoise	-0.11028941673795	-0.112551219680818	-0.313978610906758	-0.164582145134888	0.0566043448376235	0.223142588205612	0.140716996999868	0.498025953819317	0.175460305846584	0.0835826972712098	0.0987932452780136
S100a6	M7	turquoise	-0.204803503177274	-0.011710893845651	-0.0856592389926035	-0.101424741439366	0.0237223288430701	0.0902761359664024	0.0391545820489222	0.528192419002044	0.182967484579012	-0.172833693844505	-0.0561685436803355
Thbs1	M8	brown	-0.0895893677895536	-0.0858064153460349	-0.0719235148431441	-0.0569092696333096	0.0157884539124877	0.0531983586479442	0.0540849602083105	0.057390272520527	0.164816530786402	0.0403947237705744	0.120058655422625
Capg	M7	turquoise	-0.258923418637646	-0.133120547521908	-0.0610502293347788	-0.118653615899138	0.174284326643883	0.271341523024585	0.248555147216344	0.0101387679987834	0.196233777379226	0.248200305216928	0.18461764195874
Cxcl3	M7	turquoise	-0.0156635087966017	-0.0311108746200399	-0.000623777826650591	-0.0406185142994143	0.0177134303372209	0.0154987115328596	0.0061932832961774	0.0988672052594002	0.083352158956735	-0.0731928435493667	-0.0208666250911789
Cebpe	M2	magenta	-0.154150198306724	-0.0370611979514032	-0.00550755267094789	0.000769355662744906	0.0961328134018155	0.118323475950476	0.0790796303810615	-0.0131342252856222	0.0431653938962416	0.0880034749193294	0.0521948319892075
Ccl3	M1	yellow	0.227228126196172	0.0301571737097148	-0.0312533041619385	0.0210337305957021	-0.0398820010744778	-0.00542022883836574	0.0179960462964472	0.0694006422439184	0.0776147163574795	-0.0275353189558624	0.0602967840777915
Ccl2	M6	green	0.0417830832331094	-0.0287395940480946	-0.0773559607229585	-0.00916013521998702	0.0555366831641547	0.0269877358467461	0.0584235296726435	0.0240502342667007	0.0162781191649888	0.0584538949164641	0.0198182833280775
mt-Nd4	M6	green	0.03743883658093	-0.0553251189168817	-0.160715473145356	-0.0609522660469218	0.00966644424029947	0.13388509647895	0.401504342822786	0.0645998157345926	0.104516678079225	0.131438535246803	0.0965538155596744
mt-Co2	M6	green	-0.0554265354271979	-0.140992652239176	-0.305102547160245	-0.161379925246735	0.0763181536188314	0.245497008508554	0.414639711783778	0.310727353428143	0.172819498332688	0.243900737270881	0.174722254857755
Slfn4	M7	turquoise	-0.263149289007839	-0.122357568587824	-0.0984053752801352	-0.108102803015827	0.119773622505474	0.304609711526971	0.253639404543527	0.0510949490897811	0.188136391546867	0.257463578170555	0.187723401286939
Il1a	grey	grey	0.127442976378756	0.0142845399700053	-0.0261069412345257	-0.00455316389438645	-0.0555031977361458	-0.0391598067728856	0.0518434663001014	0.0354347793567922	0.0518810484632036	0.0179298966682226	0.0492040454703048
Adpgk	M7	turquoise	-0.319420817300993	-0.124386322481401	-0.119054617004315	-0.110612314380118	0.158925491227054	0.307595101104613	0.260416830030834	0.0618619884397414	0.193812672944174	0.255900051095271	0.199087501998547
Cd74	M6	green	0.00624119481019736	-0.0485719189617584	-0.0100720704164558	-0.0676212529487859	0.0532417385239184	0.0715803763204258	0.0152482200795923	0.0235852900847246	0.0964736056458424	-0.00472643924123992	0.0373906657002568
Rgs1	M7	turquoise	-0.0410477041647213	-0.0458787175999692	-0.0561142069141686	0.00194931337126642	-0.0180867916715971	0.0236426439742866	0.00200053506284905	0.127707328561193	0.0773460185510508	-0.0356246882362895	0.0129604939632199
Wfdc21	M7	turquoise	-0.260478904300091	-0.0365439626386241	-0.179150141437183	-0.137273589507063	0.0204454315389811	0.190997836085505	0.0760730049466702	0.553496944000961	0.0893072231695824	-0.0445385748606313	0.00232853628229981
St3gal5	M8	brown	-0.182399602350957	-0.0475182105539705	-0.0247816095943099	-0.0228416059259588	0.104438352244733	0.185902104256692	0.13139622864675	0.0288350258450516	0.13140346236648	0.132944405631083	0.0659639082380839
Rpsa	M9	blue	-0.173058158514316	-0.0572477554210138	-0.0828841703138032	-0.0521183437750148	0.120678471411693	0.193025589965832	0.143661879965212	0.0231826791670097	0.117014215500075	0.194832792768645	0.120324025186538
Ckap4	M7	turquoise	-0.26831340612268	-0.101526547899031	-0.0683910950042335	-0.0743879988907973	0.136695426485867	0.263178806114683	0.226446390553834	0.0442109472261034	0.142265432987572	0.246033528939128	0.171533679021622
Prdx5	M7	turquoise	-0.0772141853434249	-0.0868439019645654	-0.275223595083888	-0.141343617086488	0.115802878225972	0.218118387751938	0.128825846375625	0.485334530200517	0.11526566105078	0.138411199956195	0.110347238467328
Rps20	M6	green	-0.143815083718618	-0.078166738738936	-0.0868589627134245	-0.087389927704643	0.127189418890443	0.20309133916887	0.165464360049551	0.0265503743244834	0.129768687227678	0.167296317504318	0.145414672628917
Traf1	M1	yellow	0.212421112223632	-0.0260294239394695	-0.0739458169616555	0.00325869441406762	-0.00204085817360601	-0.00605386674981357	0.0370947849566713	-0.0331089791456389	0.0149219707030318	0.064500103842406	0.0520155774548026
Aprt	M9	blue	-0.237743600297747	-0.0914935462325807	-0.0569123820476731	-0.0498025984284782	0.116672460884955	0.242389453488425	0.189648277468593	-0.00630266496760269	0.117066019207595	0.211061009937257	0.12831803042879
1110002J07Rik	M6	green	0.0408899601523772	-0.0787316112705396	-0.070453799773992	-0.00434908949828382	-0.00452829940856043	-0.0362402582333505	0.0866388307616537	0.0229414813778748	0.030374233227962	0.0321211758697569	0.0730558663164927
Hbb-bt	M4	pink	-0.0584388473953657	0.0541753492768331	0.0515335797246481	0.0440979176429856	-0.0168530585161383	-0.0087623959020681	-0.0114905039230233	-0.0612178156647041	-0.0545124487919589	-0.0200858584210791	-0.0175439503865953
Igkc	M6	green	-0.0092801505389123	-0.0551552760351279	-0.0065647438735761	-0.0622424419852645	0.0343938596528328	0.0774698490642817	0.00463379895540823	0.05204655935426	0.0917952124213168	-0.00384425298945995	0.0165543966857326
Zmpste24	M2	magenta	-0.115890353521043	-0.012233695761115	-0.00509606397569542	-0.00793172905764033	0.0941817357787241	0.144045244471024	0.0795178569844557	-0.00605212590728823	0.0475970977018069	0.103268004345552	0.0381210729849414
Mgst1	M7	turquoise	-0.352780026834045	-0.194643222668037	-0.196432619019726	-0.176567523603468	0.136666725503698	0.304418448356818	0.276948286676601	0.153189341030982	0.243183971871406	0.23404062824537	0.206724757438541
Id3	M7	turquoise	0.0302511874225438	0.00415977455223095	-0.0727487510735043	-0.0478643802242105	-0.0110563121826364	0.055859237283959	0.0625882579854746	0.0936836417198995	0.00683172249185906	0.0544402221282581	0.0300430249899083
Cxcl10	M1	yellow	0.0945318112479406	-0.0110091514638628	-0.0265291174923992	-0.00835167434418052	-0.0132813534889914	0.0100724695190782	-0.0159943159590884	-0.0163273441403168	-0.0354097359617022	0.0591141629045381	0.0472498311155618
Krt83	M8	brown	-0.138575605454621	-0.0569486396685599	-0.0485997584441117	-0.0531194514147726	0.0477571256540006	0.143961824378352	0.114680319119619	0.0113646369591884	0.0688677856621314	0.107954953451213	0.106801355885463
Tkt	M7	turquoise	-0.352388278537301	-0.153752775540891	-0.143178028214984	-0.123760754267872	0.131687114490792	0.326939974329422	0.270363611240338	0.123295828096819	0.21221874966596	0.267138675283145	0.199903568139937
Ceacam10	M7	turquoise	-0.315637906107469	-0.176119541418921	-0.1553382087335	-0.157399543578075	0.179724116459719	0.314163162559749	0.280634347611177	0.0825720346513755	0.234936068749848	0.237435039922785	0.216015651736542
Hilpda	grey	grey	-0.101069974953571	-0.0376541413690747	-0.143818486915715	-0.0349866549370681	0.0514356574950021	0.0744448092907731	0.115732056807293	0.0583041473918082	0.0999872752413077	0.106229638627704	0.0950189470241387
Apoe	M7	turquoise	0.0133046054936726	0.0220985078868365	-0.110017105097028	-0.0494617065661076	-0.0497973177202572	0.0471593426486243	0.0819598034169593	0.128439717751626	0.00101546874720628	0.0319888797070314	0.0109926492229336
Ebf1	M6	green	-0.0184556305209111	-0.0451000050183553	-0.0112021741063481	-0.0714723823584834	0.0646170149360208	0.0677151838043544	-0.00624357605008947	0.0274765099826421	0.0970653915475895	-0.00739939782169284	0.0298659381156544
Dstn	M7	turquoise	-0.326493216226921	-0.160760083254665	-0.143516597073662	-0.14207759293832	0.192284852365129	0.335946078726529	0.272957249243047	0.0844223966055503	0.240273219028507	0.29653164510383	0.23099981133673
Hmgn2	M7	turquoise	-0.160724513928664	-0.0428798834415439	-0.0460667000532142	-0.0326956264464882	0.0577420044762298	0.120437441840659	0.0902885428430734	0.0406789116635617	0.0624507911468419	0.0851519256134065	0.0512085778683435
Lta4h	M7	turquoise	-0.214899738665672	-0.0378848369780615	-0.0280853852612681	-0.0347542920370886	0.102413814791546	0.213100408367993	0.162526505196756	0.0149846084954279	0.0914076610657215	0.177450080204474	0.0967206239710791
Rps19	M9	blue	-0.159243845434081	-0.0824662358016571	-0.0847450009065412	-0.064713779164242	0.128600674331234	0.206337844163339	0.15113114579306	0.0154537636379503	0.145809457359574	0.199490004705916	0.142810793064435
Scp2	grey	grey	-0.19922472958458	-0.0680470500318718	-0.0874500775275476	-0.0558475789341658	0.0903192441849247	0.222156805305679	0.174333404864961	0.0284457527127169	0.112715167773734	0.1875551178254	0.115708544694055
Pglyrp1	M7	turquoise	-0.100584375111605	-0.140957995871828	-0.307159267020016	-0.197790598791106	0.0750998676351286	0.246568290520255	0.161105883356662	0.598157150551412	0.230497558555593	0.0853947598694184	0.121495215671299
Rps4x	M6	green	-0.194647541175217	-0.0604971378976195	-0.0972087960924105	-0.071068577566612	0.0911044847159127	0.200576642292459	0.156622886008466	0.0865417501172318	0.121083890791608	0.161227291316551	0.103469314311558
Rpl32	M9	blue	-0.138462414913316	-0.0575536336201947	-0.0941183155048347	-0.0614955286255314	0.0932080934514287	0.196431414257062	0.151066067833351	-0.00802432776396861	0.109350789883494	0.219733877407819	0.137605316844885
Ighm	M6	green	-0.00347679885537704	-0.043806726344455	-0.00780294061225271	-0.0604805611779983	0.0240529623826509	0.0676287648062684	0.0089144886935145	0.0619282887073281	0.0876550424323012	-0.00975213210006815	0.0134672512561455
Asprv1	M7	turquoise	-0.130797544729582	-0.0913827584712625	-0.212247954165117	-0.106686123755711	0.0469170447892089	0.226088955242707	0.20520315632665	0.195214565305397	0.150415056048005	0.22635913273578	0.135690986890208
Syne1	M10	red	-0.225519354179332	-0.129795065622181	-0.0804905455221798	-0.090005216456042	0.0968145474859068	0.265851967389312	0.240682524907152	0.0186899875670628	0.154006724683194	0.257475574160539	0.236708151717067
C130026I21Rik	M7	turquoise	-0.144535511427587	-0.0495831852800279	-0.0670305395264315	-0.0304457465450998	0.063048768613079	0.1397253082545	0.124575387106775	0.0340495109473672	0.0603854860385787	0.120074790770642	0.0686961326723564
Stfa2l1	M7	turquoise	-0.0568521788621654	-0.0282632367688702	-0.0490184565338508	-0.0868670106300259	-0.0824331368678659	0.0431008243134176	0.0683674536241353	0.0988131075197016	0.0164579764449595	0.0609239569366837	0.00737142981604073
Ifitm3	M7	turquoise	-0.119644784860919	-0.0786161969828634	-0.211901403918617	-0.14762272460033	0.106901618587916	0.164294291007972	0.132477241703212	0.432392565233888	0.061544888381382	0.0964323837271506	0.0375065626270466
Acvrl1	M7	turquoise	-0.235857734275367	-0.134716594411069	-0.136557430816976	-0.108169305151009	0.123605707496299	0.209823775481006	0.243509302166981	0.0456260977458238	0.210682905277261	0.196715331745353	0.172854529783033
Dmkn	M9	blue	0.00884902636344239	0.0406422988642133	0.0130660674576053	0.00142763178163974	0.00798177107406077	-0.0262684940722524	-0.0390159584920868	0.00926814000875658	-0.0366541552521812	0.0389800777233268	0.0480761619768688
Icam1	M1	yellow	0.322375951586759	-0.00170804876553359	-0.0390833033006884	0.02529344118975	0.0201457053108508	0.0127120729703467	0.0293441560612671	-0.0916146800009074	0.0108910769929539	0.122563289009344	0.132917162897897
Rps5	M9	blue	-0.111118527536659	-0.054378211085438	-0.105338562665734	-0.0765229699101341	0.075000844901588	0.165051190727403	0.130760197884134	0.0116400389434335	0.0989901423373044	0.184355933315373	0.111115617417099
Ppia	M9	blue	-0.0998531094994395	-0.015842564590111	-0.0613746183574336	-0.0149658928814469	0.0578512519334231	0.116559232785237	0.102800584872868	0.00214258456176164	0.0380264486795548	0.15283585802489	0.0618211271139062
Il23a	M1	yellow	0.11610082858708	0.0126238838444469	-0.0508748193507497	0.0230180266561259	0.0444079167396943	0.0913587037805426	0.017196162736941	0.0508454614510139	-0.0643359888262828	0.032955033353739	0.049788416540565
Emp3	M7	turquoise	-0.266318405572889	-0.136434133681025	-0.10030881322319	-0.100047167036715	0.0881555120219584	0.261043217214615	0.220985111458053	0.0607487916688276	0.20068662887504	0.225209526061356	0.202707817671582
Csf1	M1	yellow	0.245839206064747	0.00260426095841005	-0.0715751387520416	0.00963791969724413	-0.0150560398721891	0.0305405025670964	0.0507198282782276	-0.0894686224314525	-0.0064536719584365	0.153387756450707	0.121382530138796
Cks2	M1	yellow	0.0729595046999548	-0.0428335525166004	-0.0876470719360491	-0.0924380585047763	-0.0408275842170904	0.094246220343162	0.0357008268886557	0.00241089047063893	0.0225389160628864	0.11289184601135	0.0953725078565997
Alas2	M4	pink	-0.0515613901218743	0.0445840801620692	0.0609015419227075	0.0509734467602646	-0.0205233892872902	-0.00767077070993836	-0.0193685530729288	-0.0833783919753244	-0.0577048024042244	-0.00626930275008614	-0.0280549687980521
Gadd45g	M1	yellow	-0.00116971797613488	-0.0390774718932362	-0.092398194178571	-0.0461554702308821	0.0176529450547752	0.140435145997617	0.0749016332324387	0.0419980024908269	0.0680780258542212	0.0955344592030283	0.0693003933319129
Rsad2	M2	magenta	0.03820177505407	-0.00940728845266759	-0.0268984246779085	0.0160041310301493	0.00171885565252224	0.0659341635656146	0.0316362362055786	0.0184183954737364	-0.00627140502902473	0.0489744455949191	0.0172907342874928
mt-Co1	M7	turquoise	-0.110201491835706	-0.149127598770898	-0.381038423286928	-0.169668555897061	0.0460399719653355	0.311151501821376	0.415931608502689	0.37013369620332	0.208137867550147	0.275532607747375	0.204644552163488
Rps24	M6	green	-0.14638174234593	-0.134756141467375	-0.318093895439288	-0.154884055750586	0.0718144029545399	0.22481348559578	0.342120930122738	0.25721002604441	0.198646211377353	0.270383620075934	0.238855504563755
Hba-a2	M4	pink	-0.046935073402932	0.0585333709897464	0.0393977535224505	0.0504279607469152	-0.0199834806007537	-0.00668524665692489	0.00192441383411327	-0.0596708405989519	-0.0542740208295936	-0.0102860483369886	-0.00641715374968623
F630028O10Rik	M1	yellow	-0.162639468232274	-0.15104960136899	-0.088060917631741	-0.135168524361764	0.115738000281066	0.252621623079223	0.17955899642887	0.0371283597432513	0.192883332661757	0.187006647500686	0.166652342874647
Cpne3	grey	grey	-0.19068431590726	-0.0812902307737839	-0.0988574225053359	-0.0461414573394702	0.108442705651218	0.257303250196002	0.177533941197629	0.0408876799876485	0.0984024588057185	0.210498368432416	0.106523933123325
Hsp90b1	grey	grey	-0.11381467615915	-0.0608681217867006	-0.0815072396130596	-0.0208632496107977	0.103366471962266	0.174043363485917	0.0957641146223048	0.0147968116932031	0.065487866824382	0.100945241031904	0.0532635617235125
Ggt1	M7	turquoise	-0.165311885559783	-0.136025863019028	-0.117773992744757	-0.137529083013859	0.0813498963579071	0.156342592342335	0.17172483610014	0.0500958221356698	0.168739628327978	0.14497988698985	0.176458976706572
Ceacam1	M3	black	-0.220540830607673	-0.102574403177238	-0.0563616627625038	-0.171301445040489	0.115092625384467	0.241946070940961	0.203544731855327	0.00652532424975138	0.11599269979281	0.211913553401726	0.133574187642844
H2-Ab1	M6	green	-0.0310074066278271	-0.0358796784363448	-0.017290503087337	-0.0626080792737784	0.0790544875610881	0.055211688902683	0.021301192334458	-0.00299943649928079	0.078333373127202	-0.00850138458187652	0.036350565468866
mt-Nd3	grey	grey	0.0428066728300397	0.00215520936147867	-0.121288813394206	-0.0541346524451934	-0.0141009290573169	0.0673980133324101	0.266842368389935	0.0569633991070912	0.0754727285171101	0.0780219519648001	0.0602619776562103
Crem	grey	grey	0.00777393292615179	-0.0456957837569493	-0.0816018415640528	-0.0268619845760322	0.0266061824344562	0.0346949061596293	0.10149201383805	0.0426154503640956	0.105135975837286	0.0891739365612495	0.0419441426303357
Isg15	M8	brown	0.0947672716567577	-0.00107509792919967	0.0081588434513067	-0.000943026816247863	0.0333337831128453	-0.0434788413740016	-0.0393941125315712	-0.00992135012809082	0.0557912753860489	-0.0499682626756837	-0.0459118714067036
Ccr7	M6	green	-0.0251223887126105	-0.0243879259499912	-0.0397700696477635	-0.0644939562386994	0.0602252015661267	0.0512084515117733	0.0438671067533022	0.0258747533105543	0.10524930885396	0.00644386950655927	0.0347776848890872
Tmem216	M2	magenta	-0.13797277134954	-0.00120435636015403	-0.0272290612888545	-0.0055270952172092	0.0564323304735077	0.0943419587148975	0.0878075045903189	-0.0065203909701425	0.040118243584881	0.0728086962268394	0.0189297141604934
Mat2b	M7	turquoise	-0.0949128064098199	-0.0661170916870161	-0.112444103370431	-0.0730375650493761	0.0299048936859598	0.0857077341008984	0.0466927719475956	0.161555611152633	0.121637145054329	0.0797893509388821	0.0582432588610896
Rpl12	M6	green	-0.105252777610679	-0.0760464498105006	-0.0731914210683052	-0.0828578384348511	0.0928246953886289	0.138982633643708	0.10291650280976	0.0439454687998002	0.0813050193989817	0.1023280972242	0.0855546984508646
Bambi	M8	brown	0.0144411970282702	-0.0225531274161011	-0.0091294061616596	0.0339800537935635	-0.0152536295708579	0.021598777158234	0.0565308166758751	-0.0181320329966971	0.0675067577524821	-0.0374910337268099	-0.0209501258830863
Rpl36al	M9	blue	-0.0811540092524608	-0.0217885362571958	-0.0357301030548293	0.0162871765710504	0.0430920616493215	0.0961795337726818	0.0610405632100194	-0.0151844433139593	0.0237371365178386	0.0830549800002049	0.0181323555849865
Dusp2	M1	yellow	0.305090232270922	-0.0578495928468705	-0.16581667178743	-0.0300241978654646	0.0177122848958488	0.0917379697161968	0.0517919965231564	-0.02754660020802	-0.0184725338003345	0.160193878350731	0.101652290460156
Slpi	M3	black	-0.148943837236682	-0.0713386410692746	-0.20864783968897	-0.075565197708559	-0.000463084987787066	0.289173155387643	0.172115517578644	0.198875677924842	0.116804797519468	0.141757260813641	0.0834795899721809
H2-Aa	M6	green	-0.017873727976829	-0.0270721797252285	-0.0151126224760404	-0.0582064125628373	0.0773799602375404	0.0348367839675338	0.00957046857497897	-0.0215331307189334	0.069106974012031	-0.00707753940386014	0.0323525438908617
Rpl10a	M6	green	-0.0866229708813714	-0.0427949495801181	-0.0447762416465332	-0.044888457084272	0.054890132787554	0.135478872262545	0.121919556535755	0.0414946982153061	0.113537935566882	0.0897297768074605	0.0458395635671907
Inhba	M4	pink	-0.155087171628548	-0.0568052630074228	-0.0182148146652079	-0.0294877526578096	0.0720945538782168	0.151612503011893	0.148388624020339	0.0100920592195683	0.131130388194263	0.138578561694573	0.070267077742742
Cd79a	M6	green	-0.0120674640915475	-0.0454878856742214	-0.00375856005705014	-0.0660592583187312	0.0370400826734845	0.0755014411685348	-0.00173039579996086	0.0490885186241353	0.0955757725980893	-0.00494022215303928	0.0148894576074724
Lims1	M7	turquoise	-0.239173138389566	-0.125568363321689	-0.109465327547126	-0.0772419619877072	0.0946099597979038	0.272203707925517	0.225897596266353	0.0572349686242153	0.150546877453603	0.209508453743825	0.179052418424121
Rgcc	M7	turquoise	-0.0917076108565343	0.0011345208102748	-0.0335246273235348	-0.028603934831135	0.042944171903674	0.0431950033140221	0.127327742185707	0.0789941576955547	0.0773826553365992	0.0351265745357273	0.0779257708492235
Tnfaip6	M7	turquoise	-0.101307173610844	-0.10695979854744	-0.117269680923808	-0.0575138536263458	0.0323595296977507	0.101641199163264	0.108741198357118	0.149494791805533	0.144317039290262	0.0858393323727959	0.0716791382867312
Tmem256	M7	turquoise	-0.218519299953651	-0.110044826319976	-0.0469490506040557	-0.0797879118201874	0.107823764443766	0.194902448943981	0.175194840594067	0.0132423398875233	0.0783857909776687	0.176683982101309	0.138932496408277
Txnl1	M8	brown	-0.142817272806874	-0.105232040951154	-0.0703647590359153	-0.0185198937759527	0.0328878796492567	0.089236881791596	0.155517967948195	0.0504895649725965	0.154106608071029	0.144052852559672	0.139376100621805
Ldha	grey	grey	-0.275792477512769	-0.138152259226549	-0.194500619057988	-0.139434811710073	0.132777990594753	0.328929169569065	0.29279606860737	0.110513913162634	0.21805324801375	0.324067443530769	0.242629572742542
Rps18	M9	blue	-0.179442701466086	-0.097914871220651	-0.11756518131544	-0.101625349716774	0.111020126842516	0.209033241387587	0.148106281468228	0.0569650047265215	0.119931397713163	0.185004078796159	0.116069616107897
Prpf4b	grey	grey	0.0232625348594592	-0.0853393443223659	-0.0723066647224638	-0.000902940666244099	0.0737270775827216	0.03133316598827	0.0132166600930716	-0.0329629601397108	0.0185280949289237	0.0690315553962056	0.071313525661293
Areg	M5	purple	0.0245009549304021	-0.0277393777224802	-0.0293951060706525	-0.00128439724188672	-0.0532511961593029	0.042964920121737	-0.0141933345308917	0.0339340116329818	-0.0249059345453587	0.0383765520772129	-0.0275392230698309
Ralgps2	M6	green	-0.0197711843542213	-0.0228111821904684	-0.0158542738803667	-0.0535492326395534	0.0891266605731636	0.0358382163925064	-0.00275526290022068	-0.00854968500379802	0.072344398243889	-0.00985376914802797	0.0342509520032552
Cd83	M6	green	0.00465668659839292	0.00405267519596556	-0.0612113936396021	-0.057659756322094	0.0289122421975387	0.0462196537040363	0.025436118537694	0.0144086652114343	0.0696072929378898	0.0249847538126678	0.047830312438897
Prkd3	M8	brown	-0.0708923674984446	-0.0400439524620055	-0.0572779226109594	-0.0386256454904887	0.078589466983943	0.11348517184335	0.0744917832171503	0.0668954456201484	0.132736473529061	0.0814366348676579	0.0749484954759928
Csta3	M7	turquoise	-0.0168410660528025	-0.0137144684130532	0.0199894635839564	-0.0155639508241153	0.00778077480903679	0.0268505390084444	-0.0534625506894764	0.0757038309140826	0.0217498755559848	0.0122874812830377	0.0348434765455472
Ltb4r1	grey	grey	-0.262290515947544	-0.147321007411731	-0.155450101353569	-0.114039101803183	0.132164048249741	0.324200388482779	0.276629132109973	0.0702028535035032	0.17837506666445	0.276618242178398	0.213937157899515
Gm21188	M10	red	0.0486151378100226	-0.0191386497474417	-0.0710482025443749	-0.0114543066593141	-0.0110819381182606	0.114159863642839	0.00308333755957086	-0.0382751527528838	0.0347384057627387	0.113878466694428	0.082284560278172
Tecr	grey	grey	-0.229970847435751	-0.121226912314916	-0.116499287983424	-0.0847366115547087	0.110971936563082	0.242745772834479	0.2151781747346	0.0513725674357747	0.130611483019319	0.207561494553633	0.132891853813384
Plac8	grey	grey	-0.136164294356651	-0.106052800079529	-0.201466595112994	-0.0809425862711068	0.121662662313111	0.217959894157609	0.21005331614672	0.0869865304037699	0.133172766828815	0.253824975670763	0.187298509920465
Degs1	M7	turquoise	-0.262168038836533	-0.143141591324652	-0.135228228735843	-0.14750449331369	0.088772076782179	0.292001959970533	0.257301346920228	0.0872514116710875	0.209670579514202	0.262008241068661	0.207534169773327
Ltc4s	M10	red	0.0931897002016239	0.0301246733628358	-0.00842015380437384	-0.022205787657794	-0.0263934108996689	-0.00503774339423306	0.0428890275821363	-0.0754408378412951	-0.0396497330132606	0.0792105318026248	0.0521299268108181
Apoc2	M7	turquoise	-0.0789825161497052	-0.0126758174636664	-0.074264160066952	-0.082315905461202	0.00556088898368858	0.0980190854005185	0.0332323664507574	0.112925141750885	0.0293885777679616	-0.000446181465457513	0.0515738249219726
Tst	M7	turquoise	-0.170896499452115	-0.0926591454557028	-0.0164570627764177	-0.0469860014685679	0.0617556972753201	0.1556788382268	0.160362312479671	0.00571330410375407	0.114133986689422	0.149529743536179	0.119534071339631
Hsd11b1	M7	turquoise	-0.22229225937199	-0.145158295932073	-0.100434342490387	-0.112368688562842	0.132390180019792	0.226486374333546	0.234987973501339	0.0512296225085701	0.165638929500596	0.196562117982625	0.179014092210632
Id1	M5	purple	-0.114227053901764	-0.0588882719218798	-0.158452515302384	-0.0827458859071809	0.0125468281294857	0.235559659233416	0.108885524859243	0.132983253055323	0.0715359283453287	0.117816806426101	0.0766066840840298
Mmp9	M7	turquoise	-0.116082719610652	-0.147133044409186	-0.256247985728927	-0.147049343961035	0.0323540819010092	0.185117790289566	0.149207103712505	0.427068777910962	0.214761275613591	0.0115856692326444	0.100330689295415
Rps8	M9	blue	-0.101988401423478	-0.0692453329860551	-0.126173824102673	-0.0949758399130502	0.111134577290784	0.16609087962933	0.156214436994035	0.0364612716040892	0.118090587970056	0.247652695075926	0.142349186371775
Cd3d	M7	turquoise	-0.276607261815691	-0.16033034363594	-0.137639935862795	-0.129687766941098	0.137190655341886	0.286780448001077	0.269973195910311	0.102477544350615	0.24471140797446	0.247494565016697	0.177303524980388
C3	grey	grey	-0.209301678123368	-0.117820976424753	-0.142331959562493	-0.111710508413813	0.114081142113366	0.262721476152502	0.21405446592428	0.054554693810443	0.179512783620519	0.224927768065541	0.191023657112292
Id2	M8	brown	0.10383341405281	-0.0158651227662255	-0.0529587735112501	0.00267191880887483	-0.0616742581041191	-0.00160457787077528	0.0759228274259467	0.0130300907514122	0.138606666827018	0.0204219193235993	0.0472025918750541
Mt1	grey	grey	-0.0125287877629428	-0.00767853400382338	-0.00940702219337014	-0.00054967801017993	0.058362323573155	0.0560636858446777	0.0223640124662318	0.0136327992878751	0.0240934014262517	0.0345636306313187	0.0856179844295209
Hes1	grey	grey	0.0467418117610096	-0.00726606974282033	-0.053854851514596	-0.0165492023189306	0.0254390427992299	0.0316974740226565	-0.0250697973008874	0.0183515649349963	-0.0132489661963122	0.0203138365544928	0.035383630042226
Ptma	M9	blue	0.049333968838622	-0.0122974304778879	-0.0993456972049423	-0.00212311725709524	-0.0020754329483557	0.0802491315071793	0.0688726198364643	-0.0130285228366277	0.0146082552523425	0.1527088030116	0.0682806983263455
Med21	M1	yellow	0.172506466380996	-0.0118621114604245	-0.0177717273163183	0.0675261850462856	0.00309027910469885	-0.0443609260289296	0.0472927088951531	-0.0498724776314452	0.0275038789231003	0.0902596561955011	0.094545513891701
Xist	M6	green	-0.100125087088813	-0.0884877255801449	-0.0958456646164039	-0.0516218254975419	0.0820050674468017	0.156121769858302	0.174631908875991	0.0358307818608056	0.149154452266808	0.161695046105413	0.131168692476556
Plk2	M9	blue	0.0507847860000897	-0.00102472981960291	-0.0534393389613462	0.00126463932014708	-0.0191728475213054	0.04586371558014	0.0185972226126491	-0.03711303292505	-0.0101522556342424	0.0618365559529947	0.0493608402259735
Manf	M9	blue	-0.0617358646100163	-0.0363943370903734	-0.0190943058598196	-0.0220432126343249	0.0430209774513491	0.0963265946182288	0.0421612667421757	-0.0289303840492435	-0.00969024115687717	0.110716694631795	0.00327088051208352
Ppp1r16b	grey	grey	0.0389216279093599	-0.0194447270492127	-0.0593524514754055	-0.0519440515953446	0.0402013591247781	0.0286329002226308	0.0799766066309772	0.0722176346300596	0.0412715519788988	0.0466425324608561	0.0437285914734641
Ube2l6	M7	turquoise	-0.342457311456823	-0.163373126465606	-0.171843082766259	-0.130617448550383	0.123677142153538	0.344214132409466	0.260519074958692	0.166799594359177	0.203503775852254	0.253758316731249	0.205081209450416
Ncf1	M1	yellow	-0.16309832603067	-0.132669738234608	-0.110639117744519	-0.0973505350774213	0.117830837983078	0.267751047950108	0.227830442315408	0.067837748868588	0.190588040940162	0.232840394315648	0.202507672803282
Crip1	grey	grey	0.0341827581062176	-0.0710633317733974	-0.0488095989753033	-0.0539891977990454	0.0375055244422345	0.036130493122057	0.0260460515404728	-0.023575400653816	0.0809761633315136	-0.00259213289495979	0.0152179458013342
Cd52	M7	turquoise	-0.106947989237536	-0.110466260165533	-0.402488124689837	-0.198743872878054	0.106124379821372	0.319503068855267	0.222756472640869	0.545535163807844	0.141389848902869	0.282658375070576	0.183973810126904
Cep19	M7	turquoise	-0.205303507019965	-0.0905395298776187	-0.0686927838746932	-0.0798652220716274	0.0334678695217568	0.224637843913378	0.190785113032581	0.0543260610514224	0.0972143074036461	0.196480840724054	0.168709211029144
Gspt2	M4	pink	-0.000645138652911971	-0.0244871123230005	-0.0388694576947189	0.00511251953955232	0.110235736955898	-0.00563448670642191	0.0122004231321122	0.0469098314847215	0.0332888891153399	-0.0137255417778581	0.0340185695615553
Tmsb10	M6	green	-0.122491741225444	-0.0358275725304067	-0.0441906785232583	-0.0689487277086184	0.100647744648935	0.124971231678395	0.132080646908999	0.0348754901726659	0.124279255787633	0.0661651754384255	0.0642194140571476
Acsl1	M1	yellow	0.00771838135324824	-0.0167959934128315	-0.0608600348486402	-0.0130698493594407	0.0606032861209854	0.0857394709956125	0.0533359364854516	0.0215094380595119	0.0693563855699751	0.0875798295854463	0.0660441255716226
Nktr	M8	brown	0.0191851904171953	-0.0896895135241046	-0.0767667497365656	-0.0620218359578541	-0.00286944219506988	0.0262392939304992	0.0801230437655147	0.126402250759843	0.286631749359783	-0.000105021387488103	0.0772596536952633
Hsp90ab1	M7	turquoise	-0.222357886889893	-0.140060851766788	-0.142142979403446	-0.145764131898131	0.118507015351567	0.278564763443286	0.247306283668038	0.130436374343369	0.228802835633642	0.212632763699197	0.172901900730247
1700047M11Rik	M7	turquoise	-0.257636178949292	-0.129428864286652	-0.0862261230710034	-0.112685478817256	0.128404421528753	0.263936302220821	0.227953993265988	0.0211145032411528	0.173023751033876	0.201622824826488	0.183433280891456
Dbi	M7	turquoise	-0.19974930808492	-0.132900147108456	-0.0888532315891541	-0.0767759703113954	0.0868726492733815	0.163598763945842	0.136848433060141	0.0849972712822075	0.0857424731558544	0.0890772623234519	0.136116175298934
Kit	M7	turquoise	-0.0540589927084177	-0.0209005451033692	-0.119572501633137	-0.0872030509545496	-0.0115307679543567	0.0296597527931078	0.0615162440482502	0.134273972496627	0.0471137094212939	-0.00308284601809338	0.0537977526018303
Plbd1	M1	yellow	-0.202422768125233	-0.150510616293519	-0.112188180000783	-0.10872301641227	0.12090086338633	0.278011487394282	0.258235832797304	0.0316304829243372	0.183289699399855	0.291433536213714	0.206778918462728
Gm43936	M10	red	0.0544751470542834	-0.0364642523546255	-0.0396722978914024	-0.0344394832757452	0.0183487128402552	0.0543254771983549	0.0402227282406622	-0.00235216467666057	-0.0169323943415244	0.0591555143589375	0.0715755965868333
Kcnq1ot1	grey	grey	0.0560409608052885	0.0210261396056626	-0.00511611603059428	-0.0488729012004475	0.00204798328081279	0.0565623309918642	-0.00168647883045638	-0.0196603354764663	-0.00187231238330181	-0.0270528208101042	0.0544617341559705
Plscr1	M7	turquoise	-0.223524355098597	-0.0632116249309072	-0.14028812960295	-0.101617768861027	0.124777032976767	0.252095156822309	0.179283960152788	0.140145800785231	0.117905337832399	0.185917357413292	0.173736777553069
Slc43a2	M1	yellow	0.109375541101383	0.00105560139646776	-0.0170497506341579	-0.0207042517918123	0.0211503478451448	-0.0174595557758353	0.000560355518356585	-0.0617009739869406	-0.0121074581809241	0.0289193469612225	0.0819199547317666
Snrpe	M9	blue	-0.0339698209859177	-0.0377236027695675	-0.0747107977744899	-0.0450846912213372	0.0117034135596885	0.0746091590191827	0.0516129490397032	0.0259430866273281	0.0257578697480145	0.136960324508663	0.0538195599805824
Klf4	M10	red	0.0993259421703723	-0.0157448143990182	-0.0317540769578632	0.00913913111986949	-0.0557668862870615	-0.00946606120358372	0.0202690416370074	-0.0287685552702454	0.0211954637176725	0.0872503270005	0.0299512476695956
Mpc2	grey	grey	-0.258308619648441	-0.10526090795859	-0.135409636840914	-0.0677728056805239	0.118926304321695	0.272835918055617	0.234686672672895	0.036157997280772	0.123229474201213	0.247802581007197	0.150348505638189
Srpk2	M8	brown	-0.15102971675107	-0.0600637620187771	-0.0645863605875601	-0.00793355891858831	0.110676820724424	0.224314154230617	0.168484635891385	0.0676184900067504	0.189627353713579	0.144390058677274	0.0952103219560849
Chka	grey	grey	0.0119285724154208	-0.0495962613967233	-0.0505064011940641	-0.0428096315681497	0.0323953105479691	0.0828544337784652	0.0189034958066107	0.0798178997095433	0.0159811045276984	0.0555315204835804	0.0425816774415982
Ss18l2	M8	brown	-0.0331039421502339	-0.0843424574471289	0.00845431899891629	-0.0561074690422469	0.00570914290736606	0.0640772429597246	0.0745020153316537	0.0269614093770179	0.156474573674096	0.0100822909325034	0.046508796683057
Ptgs2	M1	yellow	0.403630467874355	-0.0428627770130748	-0.055364086808049	-0.00604144117052396	-0.0331416268150122	-0.015149346355037	0.0350528633382415	-0.0703679397488495	0.0616596154504197	0.0963255997909094	0.0705271858214867
Nr4a2	M10	red	0.0424181157270754	-0.0504888785917199	-0.0165182822163901	0.0152223547130116	0.0335921524428024	0.00649270891044152	0.0151892945173347	-0.0290109169549557	0.00653088925130356	0.0696170434501099	0.0473653830510312
Plin2	M7	turquoise	-0.186298097724398	-0.112297288750323	-0.199087133125461	-0.144003140100709	0.0841901502735041	0.251617277747463	0.205068283927518	0.179803941655239	0.188416907819382	0.18148939667382	0.180850410429431
Il1r1	M8	brown	0.0048949533435032	0.0224259344284449	0.00614520891394245	0.0128022025165717	0.0116770100529849	0.0317660829762526	-0.00576548373361328	0.00325218521794056	0.0261695354187994	-0.00304641243253098	-0.0132730174358848
Tnfsf9	M10	red	0.0858529673757073	-0.0295642959184354	-0.0612368194575065	-0.0149309115734201	0.0182609712293153	0.00909126047657814	0.0284325023399586	-0.0367324467479979	0.023896710560835	0.0556454396233869	0.0819378932904333
Rpl19	M9	blue	-0.127158916063638	-0.0614179193969188	-0.122810584138442	-0.106432053915886	0.102592627541535	0.236329445246886	0.196306405400203	0.057023064759179	0.147021983888499	0.27460675017623	0.161458647257256
Fosl1	M7	turquoise	-0.171601112386905	-0.0311351148857753	-0.0987218379447827	-0.0691686244926991	0.0820644921954262	0.164148354083979	0.147009180235515	0.108945843574844	0.142564315699227	0.120686353692276	0.0763282470798516
Rps15a	M9	blue	-0.166802670075222	-0.125304463658886	-0.137483759525792	-0.135347811799933	0.108186888373684	0.241263026122101	0.159573957389242	0.0646952520206821	0.16533003245754	0.253970129441462	0.183327410577844
G6pdx	M7	turquoise	-0.271114478575409	-0.165075784224146	-0.130199494804327	-0.140754229981636	0.102656970270128	0.279453006593331	0.228067517330497	0.0940384825746056	0.189093209499891	0.224731887039247	0.199512997135138
Cd79b	M6	green	-0.00335794217350593	-0.0476736149192691	-0.00812530609825772	-0.0491668698064435	0.0197145711136237	0.0639633331521422	-0.00443948927622345	0.0541384896677671	0.0880969131873255	-0.00889434667815929	0.00834298782683091
Eif3d	M7	turquoise	-0.0471056248407159	-0.086634467968322	-0.114816399554547	-0.0780729385797537	0.0490394161913136	0.121837077942244	0.138384013630958	0.0712984657218073	0.100100184937645	0.0673312232788216	0.0799266183408925
Anp32b	M9	blue	-0.0620464156337692	-0.0324066819803048	-0.0435958182095269	-0.0229707535687764	0.0573626604576996	0.0815278295526104	0.0771690562351882	-0.00758082727538917	0.0372007821080284	0.127271693706089	0.0380166473996076
Nt5c3	M7	turquoise	-0.163871670343448	-0.0787906936199225	-0.0465032303843877	-0.0550342743792182	0.0593906679580262	0.167502745065084	0.0941243041509611	0.0343200942228727	0.105448677330146	0.118140820973732	0.120830589104307
Ahnak	M1	yellow	0.0694480078452609	-0.0499227303838715	-0.0865823431270694	-0.0368326809275565	0.0466989211872849	0.0629511009826741	0.0845096597685198	-0.00423743358795053	0.0777401030787971	0.0758482582458446	0.115557617471238
Ndufv3	M9	blue	-0.212252269087955	-0.0877448616436029	-0.102643190823404	-0.0673558114683379	0.146115639678345	0.245155418960383	0.17405968482012	0.0445562902106486	0.112594191075	0.218031383753537	0.102011044175313
Il1rn	M1	yellow	0.410818050298887	-0.00535376728495101	-0.0767164981081566	-0.0187249798122719	-0.018069294627953	-0.0348804799353948	0.0368253670787442	-0.0568540161930532	0.0542184502785783	0.0951296648229282	0.0810820174568319
Nhsl2	grey	grey	-0.176934462301988	-0.0664142441491201	-0.044958247521406	-0.0567534511681806	0.123613321299754	0.184129504304208	0.159148092900001	0.0209310770600914	0.138764087624813	0.131639876156899	0.100915791993531
Gpr84	M10	red	-0.0154319224245403	-0.0444483319034987	-0.044531530793698	-0.0351715342634506	-0.0414252942099567	0.137203146156011	0.0728257983539434	-0.00258583081096873	0.087787927235268	0.117961027494362	0.121533723203799
Fxyd7	M8	brown	0.00895486684398261	0.0476090249249888	-0.0126985524011022	0.0195552090132027	-0.0227255176184818	-0.0444539755687404	0.0140437522103852	0.0149116370287937	0.0223571698542191	-0.0388172813551546	-0.0207018611081606
Rpl13	M9	blue	-0.142745463597819	-0.0886510373433203	-0.145691240407521	-0.0792008210295805	0.121143448217355	0.224387120974534	0.173487148699015	0.0702885154443685	0.156418261913185	0.225811620652993	0.152822102238061
Ccl9	M7	turquoise	-0.030461711919778	-0.0171768771714638	-0.0550041393910856	-0.0543541927728769	0.00620846265283829	-0.0297455917762436	-0.0269738899967199	0.0778321070308904	0.0550162912603592	-0.0298254596296234	0.0190218634123821
Cyba	grey	grey	0.0055776653885371	-0.155239107203427	-0.351528042775064	-0.13373794530606	0.0722022460027552	0.198842550848864	0.164984280003794	0.378864866756098	0.161001683536006	0.210805132673078	0.128958328527361
Nt5e	M3	black	-0.101356870607637	-0.076668923666044	-0.045408428009041	-0.114704352878455	-0.0476093526135641	0.0369376383757303	0.0635468489979827	0.0503535157278998	0.0882157758828219	0.0353531186417799	0.0477654948648629
2610037D02Rik	M5	purple	-0.0442300997784815	0.0174405612191815	-0.0465199083720139	0.0140784979678477	0.0473053603153295	0.119456835565872	0.0662692084169079	0.0126042290866581	0.0160086349184101	0.0740878947137562	-0.00288242582525765
Gm26917	M8	brown	-0.0120126893231766	-0.0606828365489075	-0.0618569590788382	-0.0324463180011656	0.0509121292808067	0.0833505666383739	0.103662955135475	-0.00472379304593535	0.0742112438823569	0.0881994629358017	0.0858683056223776
Cdkn1a	M1	yellow	0.198552194191305	-0.0423284044051914	-0.0785389463303787	0.0306277855642591	-0.00350390920264974	-0.00132829881913814	0.0626459056815314	-0.0101353550030846	0.136462103806028	0.118553793484976	0.0319378723975018
Padi4	M7	turquoise	-0.227093452491058	-0.104209582850705	-0.0619864957354834	-0.104276305400434	0.153738019085596	0.241948054546279	0.203069431018651	0.0298977143809415	0.145362763778027	0.20078806657561	0.154092171219813
Sri	M7	turquoise	-0.312707530140036	-0.181702072546876	-0.20966063259401	-0.183457307109259	0.179286200101731	0.376006181698438	0.309598269482244	0.142456659232275	0.238311307335359	0.302849413603327	0.274150680463537
Clec4n	M1	yellow	0.319077853647209	-0.0156916330446047	-0.0709260797403848	0.0183742391791675	-0.00684917154708508	-0.0552310494107183	0.0288937039664976	-0.156760541226714	-0.0296090448664113	0.165752398388289	0.15479530535818
Tspan31	grey	grey	-0.0394031044288832	-0.0378486514428027	-0.0444838935796962	-0.0328756318802811	0.0452072098105555	-0.0401997554837666	0.0152014957840083	0.014273184450266	0.0430423702229407	-0.02151729536541	0.0337467418588428
Acot1	M6	green	-0.0974015876840923	-0.0459856179338619	-0.0119791173932272	-0.000886976875594974	0.00561970405030261	0.0983039531018982	0.098804769184248	-0.0138498541933439	-0.00046762168038909	0.110555633278068	0.0653863168886273
Vim	M7	turquoise	-0.157804179794192	-0.0869204463262737	-0.200414828898967	-0.123696968801814	0.019271857791916	0.217088589917592	0.151223225322222	0.19543067522629	0.143044652812923	0.168240912814848	0.128805246718951
Plaur	M8	brown	-0.0392004000624444	-0.136441845235064	-0.159435415745389	-0.162981241023911	0.0385515929760003	0.142580642602241	0.188454484120197	0.309160411887716	0.343546713364913	0.0803159624598155	0.133096037120284
Cdc45	M7	turquoise	-0.0690497798907108	-0.00413826006771924	-0.06451794971072	-0.049104330927961	0.0156580456624254	0.00122939936119422	-0.00965697661076846	0.0373981054458513	0.0614183808579326	0.0193974556934077	-0.00950464864470748
Osm	M7	turquoise	-0.133339628766663	-0.126379990377517	-0.141165806834851	-0.0950410447410693	0.0182559439877007	0.178120225050163	0.185910296757229	0.229783149450158	0.160244096871178	0.0880912192039484	0.0822047389167392
Rnaseh2c	grey	grey	-0.122563151615412	-0.0485758028658432	-0.0830366155035544	-0.0623360205625816	0.109500641875007	0.10636147768859	0.11958835267712	0.013034214315086	0.0693519615105844	0.125969277670973	0.0858831423131667
Ass1	M6	green	-0.0585119530168745	-0.00811765315738728	-0.0206386944375162	-0.0145525745949812	0.0648565593230112	0.0341047731512998	0.00920084618930817	-0.00847778173385816	0.0246173250915712	0.0437983600951003	0.0480469030922063
Plet1	grey	grey	0.0647974934241719	-0.0411374104590023	0.0156933347315514	-0.0432184055118878	0.0555937268821385	0.0334726128548699	0.0125550897516578	-0.021375603522928	0.0417125475027668	-0.0100947069852058	0.0541299196043868
Il22ra2	grey	grey	0.0346625614368431	-0.0501968061662001	-0.0394084728909795	-0.0393824326447732	0.0269521797370627	0.0527341642618952	0.0877407437797429	0.0356438765281647	0.0634730758283694	0.0524614721927483	0.0237148028217055
Srebf2	M8	brown	-0.0506812756785392	-0.0473627068318854	0.00892046592420421	-0.0543727094170831	0.0504921125953182	0.0759520511847884	0.0884416244477264	-0.032874593730803	0.0788036122936201	0.0941801513277636	0.0747939093762449
Fpr2	M7	turquoise	-0.24709586938026	-0.144300254306013	-0.198135091171007	-0.148343008560714	0.0911282580951104	0.299722750403578	0.282643784311496	0.181531901191538	0.219356805504967	0.249119285768841	0.234911392858723
Tubb5	M9	blue	0.00682682248116059	0.00406138214043417	-0.0391405825198045	-0.0300056078076448	-0.0147866446933004	0.0204122364782712	0.0180975393347169	0.012619029091352	0.0240881327768295	0.053585710591023	0.0406012145052551
2810408I11Rik	M6	green	-0.0196291811625516	-0.017805817171632	-0.046143579770007	0.00596760707960416	0.000614033103128793	0.0273732221116618	0.0632010820472585	-0.0151617559962223	-0.0138416483001974	0.0343530973324892	0.0162917880472248
Snrpf	grey	grey	-0.103265072338033	-0.0364283447592085	-0.0215041321795624	-0.0292119339570343	-0.00588025947263895	0.072386218030045	0.0419634047302428	0.0134468864656691	0.0596775354660652	0.0355700840670783	0.039938259624983
Thada	grey	grey	0.0689146034571744	-0.00700528693756546	-0.0193914564666108	-0.00789917978249302	0.00538336811114825	0.0305255896656342	0.0374302292417711	0.0447183187564097	0.0495695739638212	0.0307291837417009	-0.0112063506300972
Casp6	M10	red	0.00669452770471233	0.0021563626699878	-0.0743100597032918	-0.035253948054034	0.021715527300544	0.0114637674641691	0.0518892496346033	0.025809093825862	-0.00184721178409074	0.0814702965709458	0.0300543875926155
Rpl3	M6	green	-0.0422829197734365	-0.0430454526830392	-0.0697697957654722	-0.0540687463133835	0.0422843139513839	0.0953431630111509	0.102192415048962	0.0495579957572271	0.0865885990749939	0.0614008601879095	0.0491798847057573
Fkbp1b	M3	black	-0.00791552622956618	-0.0210998043265207	0.00774657696116002	0.011396990795394	-0.028079919465405	-0.0325636432220212	-0.0558604878604849	-0.00717512923905426	-0.0303628866239083	-0.0247328246865181	-0.00957728065509754
Dmxl1	M10	red	0.0711646456411645	-0.0334453540748411	-0.0678577361851873	0.0315332742995202	0.0231955607687407	0.0554536786146759	0.0821700264358426	-0.015725672869487	-0.00514779417678709	0.0828516725144509	0.094008258727976
Gca	grey	grey	-0.224915522132145	-0.091606742735152	-0.0919021110271908	-0.0749824085306914	0.13547316930817	0.227029481683261	0.173655563358669	0.0105309337789597	0.115377025510446	0.21700566855573	0.13360578152041
G0s2	M8	brown	0.0063237895955775	-0.0557447120527597	-0.0618327440228052	-0.0937473341561634	0.0746707940362822	0.055480453050267	0.0609276376539693	0.208690829663941	0.284968934248409	-0.00321864700692869	0.0546677515245764
Agpat2	M2	magenta	-0.193481121681742	-0.220537651272302	-0.0644920537437384	-0.035827479872337	0.11777380439218	0.228721731609018	0.15472209902935	0.0160939107086392	0.101531059300959	0.186387114711189	0.129867542607088
Hint1	M1	yellow	0.0305994465990507	0.0119578795480695	-0.0330543451817347	-0.0147208389327126	-0.0162043119576735	0.0541530658634593	0.0136163660188961	-0.0174237317472776	-0.00254436894126419	0.0492280209379013	0.0122612446788032
Sh3bgrl3	M7	turquoise	-0.165160614904227	-0.120582934931147	-0.285418928665177	-0.171749546483239	0.0666044737265394	0.216111750431264	0.178735535336938	0.438736420512125	0.145361659819645	0.181738105090677	0.174662711103029
Rps17	M9	blue	-0.149378629547211	-0.0436320802285136	-0.106176941428486	-0.07068452351439	0.101667844212913	0.186883827009498	0.152457609511937	0.0388146139228119	0.111980765161335	0.19935968259117	0.118783131432149
Zbtb1	grey	grey	0.0580842551130189	-0.0219941643011636	-0.075865525901934	0.0046157128792901	-0.0176169661519642	0.068119590366335	0.0533407438334668	0.0331118125751235	0.018509758664825	0.0888264278376928	0.028069218230221
Cdadc1	M7	turquoise	-0.20569436585429	-0.129655785058956	-0.0635377989146721	-0.081418366338383	0.0905950922544819	0.162474726794809	0.177065749387161	0.0211735756338195	0.0950753358972241	0.182492097524542	0.155225323646399
Nupr1	M10	red	0.028035808722928	-0.0525922089241552	-0.0796548052149117	-0.0140779216150624	0.0130362205877145	0.0733390461873594	-0.00229799569406947	0.0327372089575993	-0.0277559244016287	0.0797109286831257	0.0675904908086833
Cstb	M8	brown	0.067958705338622	-0.0254999896320854	-0.103446748081961	0.0111818582184897	-0.00555523481122495	-0.0532752462616704	0.0591982713885745	-0.00592764870963278	0.122510249106903	0.0796881035556668	0.0603532000999234
Trim35	M2	magenta	0.0334746321762589	-0.0356871422605607	0.021723664127746	0.0214620589793302	-0.0379735410935886	-0.0226982642815307	0.00940819636881653	-0.0440200310963145	-0.0210836740395251	0.0633874863725985	0.020552682789722
Golim4	M8	brown	-0.147839530808034	-0.0532320319123049	-0.0307543577934239	-0.0454255941149183	0.0681542620087761	0.200828257172706	0.188601737747933	0.00339878103572867	0.103755123462756	0.19538424530911	0.112551788610727
4930438A08Rik	grey	grey	-0.191178970884935	-0.126886323577281	-0.135213338409444	-0.0862534574476628	0.0658892038382994	0.179112843567009	0.177792791156849	0.0262828800392201	0.163637200685807	0.180746180805313	0.155024248354251
Gclm	M7	turquoise	-0.198997918135734	-0.140047047158567	-0.18373685565992	-0.129979971334452	0.00865906095395755	0.166697119651941	0.148041391046417	0.17642779599772	0.183730120772124	0.152884276319723	0.163968552083927
Gapdh	M7	turquoise	-0.308546375197364	-0.0761414400837323	-0.323125438631945	-0.21785689463855	0.0278602849318106	0.266329072242377	0.169457553214621	0.643425869740783	0.171432380502622	0.0930879529211183	0.0594417762898088
Ly75	M9	blue	-0.189619571458109	-0.0406143530779947	-0.0354888862686025	-0.0578726686692	0.11524314059224	0.21705960653951	0.147659077818409	-0.00739259002747516	0.0899761813987971	0.185009021036235	0.14548251743389
Uqcrb	grey	grey	-0.21562403274248	-0.0749787733721353	-0.0799612768466114	-0.0652341541884543	0.0559642404063623	0.200046280616919	0.167554628710879	0.0294098276147764	0.135031040121019	0.166807874805825	0.134676691549312
Pdia3	M9	blue	-0.0976562309278925	-0.0735977762361335	-0.052432982767743	-0.00705603687165247	0.057713904416382	0.161438858374627	0.0895987376062017	-0.00435604607996255	0.0517691172236763	0.137721745422466	0.0648871077547432
Jmy	M1	yellow	0.12477706025916	0.0140260702257616	-0.00914294935831032	0.0417501082052295	0.00589370592093683	-0.0280767161537234	0.0312627604774324	-0.0497482255713395	0.00799489083724265	0.0636894351125783	0.0416500739285925
Mgst2	M7	turquoise	-0.191764604910588	-0.0501403267971387	-0.039158578919201	-0.0251153311340874	0.0672892480058284	0.165273538150114	0.120326681811124	0.0205054718648676	0.0666811615114951	0.132127307051948	0.103924219366577
Ggct	M1	yellow	0.0663060329063003	-0.0173221488371527	-0.0372015001739205	0.0040954981031384	0.0101449744457453	0.0353980872258662	0.0409878376409516	-0.0462260903298141	-0.0317223917552406	0.0618487484966309	0.00777681202242724
Clec12a	M1	yellow	-0.173470408444454	-0.0836399821777629	-0.0640907703547923	-0.0275775502174119	0.085774874594416	0.217354008424156	0.152497073836594	0.0351624095934316	0.128532181693234	0.178372734818182	0.101101382070727
Cd81	M8	brown	-0.122472140861857	-0.0374373598293775	-0.0416124064375369	-0.0165636613937695	0.0588094711479128	0.135809364870494	0.0911292225701155	0.000492472452908748	0.109981460206678	0.124780060230492	0.0779750032543463
Dnajc9	M4	pink	-0.0203451751138177	-0.0401870434964333	-0.00693062936343935	0.0247557403260012	0.0774504700438746	0.00215093560205001	-0.0219218396380827	-0.0199866257824508	-0.0262929254814607	-0.00227205543442798	0.00106941645217645
Rbbp8	M8	brown	0.0302918103328524	0.0160201759680955	-0.0194349753388696	-0.0531777063120426	0.00982559599797614	0.0270625331501849	0.0361950383468623	0.0343861564030008	0.119918903299144	0.0393597866014336	0.0661358129036924
Trf	M8	brown	0.00951440823127797	-0.104370705773775	-0.14885736453956	-0.0602837839691674	0.0188317426227514	0.0922148305692989	0.126694346602948	0.119758306526681	0.156137921759425	0.10612507702705	0.0711197271997261
Ddhd1	M3	black	-0.0132103197403154	-0.0422775915475398	-0.013727225537053	0.00852405249567041	-0.0614210988862693	0.0112244378444867	0.019634561721436	0.000912648729963487	0.0309093667007295	0.0141770919559058	-0.037174288417732
Sec61g	grey	grey	-0.157121922552821	-0.0743229168096263	-0.101664334969607	-0.035758710715575	0.0461043298908507	0.17534550368308	0.105665354933074	0.0401182761503417	0.0483847565704092	0.143204522584223	0.0767300943571846
Rack1	M6	green	-0.111698463314107	-0.0936110072822251	-0.116434438913651	-0.103576840134087	0.106061917790076	0.178105137121616	0.190028329853595	0.0627644471869276	0.139073986204635	0.160864053755861	0.117045361268874
Cd69	M1	yellow	0.10335615931043	-0.04108426062354	-0.0265422577765732	0.0140353598997796	0.024254217992903	0.0805798017314755	0.0541597055251989	-0.0886769880924982	0.0544876161896608	0.0431748849761163	0.0887061299134054
Slc38a1	M1	yellow	0.289718172556136	0.00863063238498687	-0.0228444763483087	0.0710986854344757	0.0105142332391705	-0.0417548633235915	0.0411644494618435	-0.154326151882873	-0.0305194589656274	0.116935839562902	0.0687129509059735
Flot2	M7	turquoise	-0.288741575219308	-0.172463879994351	-0.161072835335758	-0.13369746246067	0.0871798956468561	0.235047907937613	0.201887341833423	0.0955518842113082	0.224878244702048	0.193128256840372	0.205448412569752
Bcl2a1b	M1	yellow	0.344456911833111	-0.0387977963678039	-0.00241573821057031	0.0189932623287785	-0.0233710481386568	-0.0391559909710089	0.034327803633666	-0.063870667386737	0.0740414251628225	0.0267790683941766	0.0571673511507348
Mmp25	M7	turquoise	-0.276615729987269	-0.16489967571309	-0.114406356528184	-0.116667962340935	0.0886251354292067	0.260339732554812	0.229136398398557	0.0971912586882477	0.214045328749962	0.240461728424217	0.205619762235013
Krtcap2	M6	green	-0.0751202578707333	-0.0152769272600163	-0.000274246953742654	-0.0128909413590561	-6.82564845232379e-05	0.0535703220370785	0.0568709974334014	-0.0119559403013967	0.0503943570060271	0.0539940110872788	-0.00249474150314892
Bcl2a1d	M2	magenta	0.0688716160572322	-0.00825741940131269	0.022150699796289	0.0286786171735472	0.0364264356210927	-0.00356003185699346	-0.0188163992506295	-0.0365751643982637	0.0155466086092511	0.0138029412483682	0.0392769238824266
S100a8	M7	turquoise	-0.314535221004362	-0.0490783873941727	-0.206705404009924	-0.183250945916047	0.0481286339535833	0.231751137998798	0.0891990002060922	0.751616556127502	0.155118470969452	-0.0810574138132359	-0.0303690796202245
Txndc17	M6	green	-0.261570430743551	-0.132176779303889	-0.114882521041086	-0.10830097138357	0.102753742187643	0.259330664762608	0.249155903735137	0.0495904081340355	0.140175686596959	0.198660633627217	0.153171506140251
Eif3h	M9	blue	-0.15713136419508	-0.0572093926572054	-0.0928258224345623	-0.0473515897982965	0.0625195830512642	0.234706017880338	0.166657844912209	0.034290243525756	0.103416788157091	0.1967168654497	0.108777665885273
Pnkp	M7	turquoise	-0.307818264402506	-0.174172631531291	-0.149537118992011	-0.123221335227432	0.138845670893475	0.313772464269264	0.228979663358425	0.166157095442243	0.210330261259828	0.197914534332847	0.211640266716006
P2ry10	M8	brown	-0.00145123681585315	0.00562244840876453	0.0238373754618046	-0.0120900862481545	0.0118175005897171	0.00325349622368864	0.00595810181011875	-0.0168462549318699	0.0822875081141141	-0.0366187565951239	-0.00749625816221812
Atf3	M1	yellow	0.295123829227341	0.000956743979281047	-0.0749663562990229	0.02301041954324	-0.0648289529489131	-0.00710317708067277	0.0823405604923766	-0.0968053085587616	0.00607331550204739	0.126918669948123	0.0369999965304244
Samd9l	M8	brown	-0.154942600406097	-0.124149459953045	-0.0954982909814785	-0.0939571612094126	0.0689061919060288	0.217147699451321	0.170868271526956	0.0563118165949813	0.189922234936012	0.157967806922894	0.160610543383832
Serpine2	M7	turquoise	-0.0518202776201837	-0.00459217070147969	-8.31362148936764e-05	0.0126533238350119	-0.00216500603203732	0.0418385465705763	0.0145407511221965	0.023403688919747	0.0625388763413085	-0.00390744651566527	-0.00322893383221901
Gm20186	M1	yellow	0.176345330066797	0.0113537606334691	-0.0658820640552896	-0.0226141538883954	0.027972716946977	0.0320412156543265	0.00200965118788625	0.0143282384442824	0.0424513073224388	0.0641351134822377	0.0661296686660039
Gm8251	M9	blue	0.0353911669069985	0.000846623564153826	-0.00279551696356347	0.0387823822909728	0.00351871014231302	0.0282968392763168	0.0293215765095438	-0.038600372701229	0.00159711461313202	0.0636869007278352	0.0205451859262749
Flna	M8	brown	-0.281500138014429	-0.16234486695425	-0.143749586014753	-0.136263275358529	0.143545096991281	0.31677138279602	0.26543181096474	0.0735712096372047	0.309046751467446	0.258107730726276	0.20286307283372
Rplp0	M9	blue	-0.182197119352654	-0.118912278949453	-0.172304256182055	-0.111394921221846	0.126161899685503	0.250579373604045	0.222570788678916	0.0803701876502189	0.221616422206799	0.285035975269764	0.193689497374461
Ethe1	M7	turquoise	-0.241970083737396	-0.112543398077287	-0.0846413155321079	-0.0897979125255651	0.127149770770216	0.232640500875099	0.191363256547634	0.0590493167639786	0.135426126436942	0.197225572490828	0.151571409378224
Adss	M9	blue	-0.179641645244031	-0.0979835688732157	-0.0508896787375986	-0.0569479135878979	0.0887052190113594	0.195718340416779	0.164147603881677	-0.0156298867459055	0.129922379000199	0.195186432105702	0.124983509456444
Rpl35	M9	blue	-0.11539793640508	-0.0774520026736127	-0.0217309977095019	-0.0725830370252227	0.0623500856824824	0.146707995007825	0.0880553018940352	0.0101347609755274	0.0611193388571082	0.121759074171732	0.0562285156678146
Metap2	M8	brown	-0.0931263044507532	-0.0173117231267735	-0.0149289255240181	-0.0226535578895062	0.00965278603630489	0.0784232649434788	0.0692461648480395	-0.00264915725009711	0.0334266619620607	0.0457943802009124	0.0324703273970947
BC026762	M5	purple	0.0111188746131234	-0.0280995004279268	-0.0776796179712777	-0.0487354915462098	-0.0458870336674223	0.114966176564468	0.0416655308710772	0.0804381779012902	0.0482893856048726	0.07608785616341	0.058854448312003
Elmod2	M8	brown	0.0584965719541358	-0.0163164876672772	-0.06395594422677	-0.0408104866654192	0.0161968215552684	0.0268717839369067	0.0994790164807657	0.034500677750258	0.0671650814956711	0.0716572045730807	0.100704894603844
Fpr1	M7	turquoise	-0.179347960617936	-0.144676326976496	-0.221966044417492	-0.177855135806688	0.0648598668040856	0.240480864126069	0.215185439493708	0.19764464974689	0.211858515174857	0.197224409203716	0.197034199074379
Rasa2	grey	grey	-0.187931855252419	-0.109250377644551	-0.0727822534344417	-0.0721668417236208	0.0750125199909136	0.143869050716281	0.173374969504114	0.0244653622480565	0.133811568910842	0.175641639880378	0.153362145192689
Lsm7	M6	green	-0.0310972609651833	-0.0073188886381446	-0.0246321131594071	-0.0104162413902832	0.0796469576092621	0.0324245096085154	0.0405808842643276	-0.0216611126435267	0.0336033145269564	0.0470782946149407	0.0460803233986084
Sp140	M7	turquoise	-0.235253999371278	-0.160687233114282	-0.116275959334447	-0.116279938651441	0.0728233251117468	0.248203120086879	0.21683477248172	0.101618522131384	0.230982371973474	0.206448841089129	0.17021674005477
Atp2c1	M7	turquoise	-0.22498161179654	-0.102045268899614	-0.130594433476942	-0.115704000796492	0.0940128234588752	0.260777541041885	0.179943391067834	0.083059448249525	0.167315893186416	0.192155199332882	0.184259642312455
Pax5	M6	green	-0.00581104484393579	-0.0496875755959649	-0.00511108579785298	-0.05970853486317	0.0284787281896083	0.0740923052719409	-0.00559014231892087	0.054939315760558	0.0897964244858015	-0.00662499928978732	0.0127426934698444
Ms4a1	grey	grey	-0.0166812624249432	-0.0497530479587352	-0.012142126584273	-0.0758132472387502	0.0412679902209745	0.067329297906775	0.00826609867690095	0.0477841324018119	0.0782069972452219	0.000746145158368378	0.0274548111030884
Vamp7	M5	purple	-0.111947863222078	-0.0412945446764294	0.00575779504038981	-0.00888283399867423	0.0288525369381865	0.126339252495134	0.0578565580978184	0.00732260532709397	0.0226739664824311	0.0863905443213633	0.0335192867288478
Phlda1	grey	grey	-0.00393443253333657	-0.0778314665218225	-0.171120025980598	-0.0594164788721995	0.0566401196621534	0.125618561951871	0.179927825090624	0.143197796556066	0.136321837165122	0.131547386041946	0.105745904685897
B3gnt2	M10	red	-0.156996101499901	-0.105652178230535	-0.0922982656852242	-0.0893882210725263	0.0769578172373289	0.228951388096603	0.188923212241861	0.0110695048419479	0.150595433428963	0.22984145959327	0.246572844358435
Cwc25	M8	brown	0.0607549932496696	-0.0363936279171587	-0.00764515616037548	0.0211338756132708	-0.0141130154025789	-0.0544693439398124	0.0412813294463014	0.0309425894277445	0.176959675302381	0.0168473366728379	-0.00820992875813973
Gpx1	M7	turquoise	-0.0903959393930793	-0.123518344929614	-0.329111369929758	-0.19182207204401	0.10881675601832	0.260898903652533	0.180371715954727	0.402336794350057	0.135627693030194	0.196755353710026	0.147471486943528
Cd55	M6	green	-0.156075036241039	-0.077501877971944	-0.0235019696706631	-0.092078348025266	0.105832519538399	0.165035983679368	0.157009783060544	-0.00674302272869246	0.142007670811591	0.177577380148626	0.149685883178164
Ifit1bl2	grey	grey	-0.0414510692093878	-0.059568358476731	-0.0222484069420224	-0.0678581284716937	0.0157640648901494	0.0377699402268103	0.0197141542598244	0.0311840574030727	0.0352194612157146	-0.0160389874088261	0.0327413369914294
Mpp6	grey	grey	-0.0319396280943285	0.0112781549783562	-0.0196005247763836	-0.022477958323985	-0.0231858177126649	-0.00245772917692905	0.00833124502510424	0.0246818001082989	0.0233496217654562	0.0101504800223909	0.014522972312872
Tent5a	M4	pink	-0.0707743431297873	-0.0459478102848533	-0.0676535728670682	-0.0706002760085399	0.141782786438514	0.0953734468228838	0.0735124635363816	0.0432017223714985	0.0695133741761468	0.0654136322334433	0.0595862428916139
Lrmp	M10	red	-0.250934130274799	-0.13652979337108	-0.0915951821929642	-0.0956668783741073	0.120607784809382	0.268619286660017	0.228805403811932	0.0454713904612868	0.165656581125031	0.264449878109954	0.275286795442813
Cxcr1	grey	grey	0.0151472240243045	0.0254666374443394	-0.0684705214648756	-0.0631556539955729	0.00589012171358765	0.0509067994045353	0.0801669100363647	0.0462358798314651	0.0199092898282248	0.0329525647633209	0.00802870699836548
Thbd	M8	brown	0.0276422352975901	0.0483767077881076	0.0275427768532038	0.0376621351576622	-0.0168739524392117	-0.0252464576343253	-0.0194421227516009	-0.0261370336161719	0.0388770484293814	-0.00896449709379328	0.00294739212059133
Jun	M9	blue	0.0874018335861452	-0.040972424006007	-0.150590178853772	-0.0260953006406676	0.034757815489457	0.130534277911265	0.168901270579272	0.00917151748873616	0.102954966679307	0.208271923658959	0.132188421254384
Spata7	M4	pink	-0.0274609749251929	-0.0068719035619913	0.0155831179707289	0.0289966243215719	-0.0657078291367793	0.0480381755241009	-0.0394890355826066	-0.0135057969340288	0.0265318100392127	-0.0118059070499698	-0.0508664534630576
Sptbn1	M6	green	-0.164358702172339	-0.0684679691121733	-0.031831134656681	-0.062801378881397	0.0777279395056138	0.19381345625773	0.191957886979281	0.0131029495296345	0.105943591817875	0.17668129976804	0.117446221423031
Dipk2a	M8	brown	0.0473307587522057	0.0236643123093326	-0.0151422447035927	0.0565525685791614	0.0278833796170955	-0.00519269051414117	-0.0295653992894165	-0.0181934337197291	-0.012310053271979	-0.00805584022651753	-0.0373717309324483
Rad17	grey	grey	-0.124699781218158	-0.0758034736922704	-0.0516136647572559	-0.0504356658886062	0.0261041496578849	0.0926804856453108	0.100755123955395	0.0109545694176361	0.0207230509515175	0.0899309370875063	0.104743700882747
Ctsl	M10	red	0.0334174014095565	-0.00650305674396844	-0.0805479463897738	-0.0560308137477057	-0.0178956396809342	0.0338315886941644	0.0345723196431837	0.0364345163412562	0.0212916961835411	0.0619368276527592	0.171916247166545
S100a1	M8	brown	-0.137935177258339	-0.0181857486120526	-0.0226107241749415	-0.00654541436154552	0.0323617887951682	0.0999633653824735	0.0822778414258166	0.0137083338581751	0.0466818792422275	0.0669999005349196	0.0534941791099181
Cldn15	grey	grey	-0.150839826647878	-0.0239465116329168	-0.00855357024556176	-0.0226735068785861	0.0413300021247225	0.113820758782641	0.109395589975252	-0.00379488467305416	0.0459805101953692	0.108198431017957	0.0563968796687066
Nedd4	M9	blue	-0.134623901250708	-0.0494742150894795	-0.0207891480846854	-0.0482782061196175	0.0130529335867437	0.14250179219177	0.126620980919023	0.0103520746523122	0.0652676928156861	0.130422112063716	0.101621150276428
Stmn1	M3	black	-0.0438663129162592	0.014305639172576	-0.00392717718672366	-0.0731419035126614	-0.00903265561778078	0.00844159891902739	0.0298770435210172	0.00997549676640492	-0.0120719513325173	0.0063451406071825	0.0123775703628841
2500002B13Rik	grey	grey	-0.0808176207210614	-0.00887247017614933	-0.00961905857276659	-0.043719753518925	0.0961014170477506	0.111497882182016	0.0775562881533077	0.0013369367224412	0.0887047732447589	0.0985623514884801	0.0484495889086699
Ada	M10	red	-0.106771781018347	-0.014089786400374	-0.00622851401496076	-0.00929424211799532	0.041259669806798	0.109917341283029	0.116580261675629	-0.0112534008542853	0.0572740757425361	0.143105411325669	0.0176916670557893
Ropn1l	M8	brown	-0.0477737778404898	-0.0466613510877254	-0.016871298289482	0.00864688377383369	-0.0708143427251779	0.0651386839485505	0.102869925824714	-0.00544482011253574	0.0622065584428137	0.086687718011444	0.0735886709784456
Tnfrsf13c	M6	green	-0.000567164249510966	-0.0442095109878252	-0.010016336365196	-0.0427230071445371	0.0183649536005489	0.0538093918501046	-0.004908619404675	0.0493960554937577	0.0763735701821923	-0.005817311655866	0.01161768304111
Ankrd37	M9	blue	-0.0169140513961561	0.0402680058863963	-0.0243132438487016	0.000969466484545206	-0.0202362197123375	0.0321743003530672	0.0202136619916639	0.0310837748669728	-0.041061552108518	0.070435677488701	0.0104596250689521
Gpi1	M7	turquoise	-0.311754802478782	-0.171477401461275	-0.224479733266597	-0.154744278432078	0.137080207160837	0.32995543073014	0.286663040842622	0.198930198138793	0.225751970411399	0.261953585198278	0.224269677995207
Ywhab	M7	turquoise	-0.276047308027828	-0.135997156521502	-0.132717449674523	-0.0901633767805387	0.170349042912495	0.28270813778499	0.20473487043349	0.0857077042930782	0.138429740696	0.229834394379819	0.169658217105428
Lipg	M7	turquoise	-0.171048090003187	-0.0712064150240287	-0.0957279562330102	-0.0512529104838102	0.0598114933951133	0.137594731474055	0.126777733122442	0.0913906751987404	0.150544806404773	0.138204836006039	0.124631305331808
Eif2s1	M6	green	-0.0568744332856524	0.00866699082755826	-0.0319995119106376	-0.0227109360922806	0.0545505286390419	0.0366474091105586	0.0386433386864126	-0.0231272692536792	0.0379642172927667	0.0396297243823638	0.0206676309922833
Chaf1b	M4	pink	-0.0148678705583996	-0.013897235675745	0.0147052977225464	0.0188778828095883	0.0371119417228404	-0.00503746756974318	-0.00655320184776616	-0.0079994077169679	0.0107758954023641	-0.00589559081857036	0.0131033723760571
Serpinb2	M7	turquoise	-0.00215489913150839	-0.0697450688587926	-0.0337042065583137	-0.0125177679902315	0.0118394637999608	0.0482725581364187	0.0255940396674216	0.0530653924456379	0.0283891248921518	0.044909289046578	0.0402450389077235
Proscos	M1	yellow	0.0575559053511326	0.00413915962453634	0.0325212196490866	0.0328485448415631	-0.023003233182066	-0.0267710679679306	-0.0274328026059684	-0.055248117695025	0.0392878697789608	-0.0371283081410427	0.00995781985254757
Ffar2	grey	grey	-0.0854041217106709	-0.0119213429546767	-0.0243678061408395	-0.00618459162008404	0.00528906215903845	0.0379975198848057	0.0484376720593972	0.00119704726426245	0.0315821301091283	0.050327866182301	0.0288707225391777
Irgm1	M7	turquoise	-0.0212087349472515	0.0203717697364164	0.0282387101249936	-0.0606626750000801	0.0346897822981783	0.0379261953332867	0.00595415228082835	0.0691968001198837	0.0261900605973553	-0.0217038421320769	-0.00420426584880041
Ikbkg	grey	grey	-0.0923533086399404	-0.0934890292938044	-0.0730055169292507	-0.0668634852580612	0.0566603182941363	0.0696300302398979	0.101171487644823	0.0361678901496981	0.0682817819169143	0.0907346438299776	0.121160243261271
Tmem192	grey	grey	-0.0630418841227156	-0.0288245053034835	-0.0315417450046124	0.014906577695486	0.0403360744294968	0.0560320882169764	0.0152277008527249	0.0329172463335395	0.0303763160823886	0.0812826058159019	0.0751844799115923
Hist1h2ac	M8	brown	-0.05757978716224	-0.00864809480311417	-0.0306551074196765	-0.0217710839315032	0.072552188102393	0.0955783166654192	0.0382651881786522	0.0233815907567259	0.051077695887505	0.00340232291532082	0.0198939968756313
Rnf10	grey	grey	-0.204419399722054	-0.145332600300709	-0.115868950522794	-0.0786043766956181	0.0696730226648537	0.238226528400003	0.202155404741668	0.029696247525363	0.123705152462025	0.223273593195473	0.190139248763632
Rps11	M9	blue	-0.182458495616544	-0.0924726538160226	-0.180308772882097	-0.100695231794301	0.105980534194019	0.231483825240467	0.226992620805342	0.102824073540217	0.163668461052755	0.305974445014593	0.202413050557731
Trp53inp2	M8	brown	-0.177072715897459	-0.0867468677520174	-0.068088260520823	-0.0443111509893027	0.0780626345820993	0.201386942571625	0.182753866671367	0.00824372115264903	0.165359080021769	0.186043544629241	0.131726569385525
Rpl7a	M6	green	-0.144683052373851	-0.0713200071429954	-0.121522169343138	-0.0838607881156526	0.0778156407759538	0.209231405053232	0.177407240222994	0.0949317958935199	0.145100629571668	0.182375375877695	0.125206106850498
Tmem40	M7	turquoise	-0.251062597026168	-0.112815109463084	-0.0958181603263275	-0.113563870385155	0.0950505748329377	0.242025630741109	0.229190308229491	0.0796348421107036	0.150764134100187	0.218045751679033	0.178869380251966
Lbp	M10	red	-0.162350376056991	-0.0700662975451557	-0.0634444047429761	-0.0712261131756124	0.122512102237933	0.187600770753914	0.144209834733532	-0.00639815174034362	0.0805829880832263	0.196999709603405	0.213355129151312
Nr4a3	M1	yellow	0.244662979872447	-0.0189248088885035	-0.0501453449770239	0.0243375887469122	0.0243091566749322	-0.0237238029031342	0.0597475702955349	0.00774476220180831	0.073216796921709	0.05592224316541	0.0828955273216164
Clec1a	M9	blue	0.0593714296119005	0.0136376114700256	-0.0210990906868714	-0.0114445340106346	-0.0422280151867263	0.000500424781363936	0.021484640625951	-0.0354927286241359	-0.0115246609611299	0.068360913752889	-0.0254045173114882
Slc25a24	M7	turquoise	-0.262408690436749	-0.106983954894629	-0.0980400256180924	-0.0943513534525818	0.120369836475023	0.2345538290909	0.208757046637425	0.039164370569921	0.136501608162579	0.206561907051506	0.152851014987545
Colgalt1	M2	magenta	0.0400400759451585	-0.067247952905831	-0.0106576707382262	-0.0250736483662342	-0.00759325891750961	0.064525447485893	0.000651690162617363	0.0374076688974352	0.0447259734453106	0.00491791312870288	-0.0104366753071557
Rps28	M9	blue	-0.112764859375933	-0.0544407517503663	-0.0957221022087915	-0.0764031538234731	0.111850241138798	0.187844658464785	0.170670650609895	0.0194214968301336	0.101913907392292	0.264377430504892	0.179962418303071
Hist1h1c	grey	grey	-0.0402717232259884	-0.0865110183165922	-0.146776722566222	-0.108354230465906	0.0649681659791911	0.154678881092486	0.082105625355618	0.0909282226358726	0.0889865284071805	0.176624117704134	0.145760505682255
C1qtnf12	M8	brown	-0.156659536924953	-0.020486610359625	-0.0318474920471947	-0.0102579687548089	0.0831790504072857	0.178979704404453	0.145110783282499	0.0021818983066542	0.0769150942290277	0.146378564601087	0.0653118556199692
Nop58	grey	grey	0.0703271807162602	-0.0804437663824077	-0.0290147040451352	-0.0100570848948245	0.00682071154719974	0.0399319212027734	0.0190154524269108	-0.0380587550550609	0.00834220834895926	0.0288786148132149	0.0538522521784852
Rcan1	M10	red	0.0419975783494852	0.0203397420171202	-0.0567491425435756	0.0304771143176368	0.0440017869934238	0.0573712440375832	0.0484164523813774	-0.0468093935281523	-0.0190151413862116	0.0992371817262606	0.103065286685065
Ostc	M8	brown	-0.0800284076351597	-0.0635859693186915	-0.0274099600118155	0.000797972738414376	0.0331241833576726	0.115855073919835	0.0656574505687548	0.00240845118977227	0.0843693757895574	0.0854886894633192	0.0586857577037825
Ints2	M10	red	0.0756476506353043	0.0023489948370055	0.0225604794054133	0.0198338822392508	0.0216061174281199	-0.0192111957545969	0.0205854660280257	-0.0350771819535898	-0.0213609121030488	0.0476815647780244	0.0586058276161735
Oas2	M5	purple	-0.0477628932910251	-0.0322993964547924	-0.0792613925375992	-0.0352158730327593	-0.0696420252051766	0.0387517245538777	0.00106965905523432	0.0329486187012399	-0.0123066449534745	0.0212677920552606	0.0083367820628003
Dbf4	M3	black	-0.0472489170801017	-0.0169871197519106	-0.0193352256260668	-0.0403464596203388	0.0371620607270279	0.0622949461211749	0.0201595210513303	0.0130140745933779	0.0281627118032595	-0.00515877562692784	0.0224893002595599
Pcna	M9	blue	0.0460706209001567	-0.0169324900122022	-0.0630847121429174	-0.023822032961472	-0.0388976090928059	0.0428386058517007	0.0419327495141522	0.0122793530826643	0.0271625379140032	0.0942323305758453	0.0643360275136989
F10	M9	blue	0.0112999098368043	0.0066044458599322	-0.0498556506463063	-0.0221656150263868	-0.0277221812935665	0.0557417442775977	0.0138592477845011	0.00502863717593355	-0.0245763012266545	0.0831263068678427	0.0587112923922666
Zfp651	M8	brown	0.0275912355835998	-0.0506947780654291	-0.00531946479670394	-0.0206996042288378	0.0249749512358274	-0.00147577064756817	-0.00209532525446989	0.030267686421833	0.106713676630999	-0.0577948207921749	0.0183745322590754
Limd2	M7	turquoise	-0.25261402684226	-0.124368985669091	-0.131088181298772	-0.142540880881912	0.0914908845925221	0.235472686414054	0.189965185960225	0.164784373200925	0.200997018498215	0.145301061114154	0.128536286615916
Rhou	M8	brown	-0.17479502934219	-0.0905640344967078	-0.0216977170052397	-0.0200030212275188	0.0474179035744177	0.180029448474553	0.123359656579466	0.0230331513681099	0.112886948529331	0.141737186142387	0.0622147340265951
AI662270	M7	turquoise	-0.161388177599029	-0.0670697184905618	-0.0265714607803468	-0.0109265670272836	0.051760026922124	0.119823235476239	0.0517033698247332	0.011186479516657	0.032352038473773	0.0755953060106275	0.0343748301642351
Rflnb	M7	turquoise	-0.256103038385363	-0.139684949818161	-0.175900908632054	-0.155930473433881	0.0999765367662938	0.282568928325972	0.180189829068164	0.151756087460748	0.178191709181717	0.181914120759221	0.187969779371805
Mid1ip1	M3	black	-0.107104724840297	-0.0628914261123781	-0.070683187279457	-0.189874699066414	0.0351995772554854	0.154167608377356	0.10400969930765	0.0681188542882006	0.0870317663982796	0.103098100829348	0.0836047242820906
Anxa5	M7	turquoise	-0.147908526241695	-0.0979485909557387	-0.0448618949842297	-0.036315911368237	0.0677345005385406	0.178412223432331	0.15451295585141	0.00222654738114842	0.0821146743878343	0.163467089986103	0.111348421223431
Ero1l	grey	grey	-0.0799227343687836	-0.0468153872109824	-0.0778321139605565	0.00791933613884949	-0.0112536229397258	0.167340352730912	0.102039671683068	0.0478384098626172	0.0579761583468226	0.124839138425404	0.0452762109825565
Pgls	M7	turquoise	-0.205754291932193	-0.0976038080679725	-0.104173048537484	-0.0911979514203496	0.0854552093204144	0.247139335351795	0.176598680518767	0.106499097854307	0.125328179090269	0.19186391545032	0.138221805692014
Dek	M9	blue	0.000351776919547511	-0.0631339766788087	-0.058961165047265	-0.00356762130004425	0.0121200909399358	0.0691950499747397	0.0819636420953019	0.0356798478902806	0.0421977983227842	0.139372924236364	0.0417907592714894
Tuba1b	M6	green	-0.0429235139299796	-0.00154739275744102	-0.111058765056333	-0.0330266862534174	-0.0188131311154364	0.0690744718483796	0.0976983931066869	0.0352968576051484	0.0458194840213128	0.0943216359555942	0.0304062542149811
Sem1	M7	turquoise	-0.138192336926505	-0.117540745661898	-0.335462183171719	-0.168314501374191	0.0566531449430857	0.226324254704706	0.227119494005306	0.437497057922351	0.211141432448348	0.22357052661517	0.192909529512939
Ndufc2	M7	turquoise	-0.0946155217951193	-0.0281310176388724	-0.0482029036924278	-0.0275883865157621	0.0378281715352406	0.0761141257815435	0.0410502843233648	0.039754876510213	0.0434764721867213	0.0496172785641671	0.0384392891670851
AI987944	M1	yellow	-0.0407465568142565	-0.0518836397291475	-0.0103307525148221	-0.0312191326504235	0.0818480242918932	0.0362379974082651	0.0461853476305542	-0.00936313518496116	0.00855913046339559	0.0562541167059705	0.0463201044772822
Havcr2	grey	grey	0.0799503695694187	-0.0154845696282804	-0.014907216253649	0.0147629280784889	0.043918339812691	0.0490462663765629	0.0387995408729868	0.0031460349954718	-0.0271645394465046	0.00446252395613611	0.0276270235571346
Atxn10	M7	turquoise	-0.341288657238974	-0.194415934953644	-0.232430499239787	-0.179364127747655	0.149495734114846	0.308728275508928	0.264521692348282	0.280550717598562	0.251798685408057	0.22070353107904	0.198778698435605
Commd1	grey	grey	-0.160849864566387	-0.0368839731698167	-0.0399649364341768	-0.0395951673524901	0.0475550091582807	0.132857639179282	0.0832354460107837	0.0141943380066537	0.0428445599278095	0.102593439634778	0.047321160089152
AC168977.1	M3	black	-0.087857023372705	0.00558300037924716	-0.00868098291725364	-0.0207200073857169	0.0888228579904861	0.074743433479308	0.0643876151676421	0.00657378060643034	0.00847552064281989	0.0631474121287315	0.0259931981179316
Fmo5	grey	grey	-0.19517616091219	-0.0883371425263206	-0.0993266985889254	-0.0946869665280318	0.134945605968345	0.211236425350421	0.174286883649	0.0419829860144226	0.105890395760035	0.150451088411644	0.141557364691381
Socs1	grey	grey	0.0211379685614084	-0.0158785587527656	-0.0730404375695877	-0.000689037955305545	-0.0154927379124711	0.0147237936910891	0.0539250633832436	0.0196174876104175	0.0412870887605447	0.0568389027135438	0.0501549797984188
Aars	grey	grey	0.0182471271776861	-0.0726468205971641	-0.0878474352128296	-0.0264400313877175	0.0369449638012938	0.0510304576602459	0.0147539004731055	0.0291802837963317	0.00829795982927675	0.0207916960616512	-0.00669743300900043
R3hdm4	M7	turquoise	-0.381022159706121	-0.232058337713617	-0.250452190790508	-0.228533820433316	0.152270086562612	0.364617088838928	0.28478891125325	0.25634529106593	0.289087595021063	0.245204404821277	0.261882301130174
Gadd45b	M1	yellow	0.420495455827443	-0.0415581702886393	-0.00377175144747049	0.00748251542308086	0.0224066989282408	0.0146716146743187	0.00420112267886562	-0.107211318375412	-0.0475665861684852	0.0754227886754271	0.10550588824965
Hopx	M7	turquoise	-0.193242412553684	-0.114667385509957	-0.14901744614155	-0.146562491588996	0.109559444752463	0.189587924321057	0.148815926462352	0.126025906051474	0.216471868595905	0.10463534339004	0.145927131349079
Tfrc	M1	yellow	0.0754302277323813	-0.0302173919696074	-0.0372774289692251	0.0136758014968837	0.0325392953080967	0.055396235517015	0.0162156661861181	-0.0204722366988598	0.0194059568753714	0.0602391942339255	0.0571481178150437
Nucb2	M10	red	-0.158038761567838	-0.0579117898270963	-0.0448127861375299	-0.0570467315929816	0.0864745863698879	0.146871322477568	0.191627182776908	-0.00924345973045225	0.107592370773787	0.192926297313584	0.145280793075276
Crispld2	M7	turquoise	-0.159367667030985	-0.0780503613282044	-0.0511760467844376	-0.0701043979523557	0.0410503136785572	0.175853800670203	0.140964118692379	0.0692376688374429	0.104660041636354	0.139221268712999	0.103098075994932
Rps15	M9	blue	-0.100333824576529	-0.0919673404031369	-0.134010203499435	-0.0910426079695377	0.0850496914434331	0.214879557748323	0.174698272217761	0.0155803474344621	0.121961391450344	0.272585613820845	0.148068756860153
Clec4a2	grey	grey	-0.231718968970035	-0.137717720013889	-0.160238051345216	-0.1370479149159	0.146431680188818	0.290271256458983	0.212306778614385	0.0968012104824852	0.190657132016632	0.22338646969029	0.17829836012365
Acod1	M1	yellow	0.260105887503377	0.0343737418353332	-0.0317352017020803	0.00138692568555669	-0.00716927029260542	-0.00609435836493827	0.000321800562647999	0.106436945912837	0.106148988455878	-0.0490769055221512	0.0689731518056297
Siglecg	grey	grey	0.00476054156055687	-0.0816199113053312	-0.0220851664339409	-0.0394517760828927	-0.00859670492303772	0.0469019941175804	-0.00328692601180724	0.0559238123819214	0.0881820361150419	0.0030219982787452	-0.0019774421245375
1700063J08Rik	M9	blue	-0.0350417044527558	-0.0275656198166125	0.00538420138799278	-0.0167708543069307	0.0522832195122892	0.042897321248431	0.058830830594048	-0.00770390114029606	0.021820029608533	0.0732392392660464	0.0404836602040658
Klhdc4	M7	turquoise	-0.176648360863857	-0.104179412713667	-0.0438805309523834	-0.0571622627274196	0.0502235903187676	0.176696524927576	0.15928366878943	0.0185951826977317	0.134309812204193	0.157211528533019	0.140575220673742
Mapk13	M7	turquoise	-0.28812787331228	-0.188138039635305	-0.226387142837401	-0.179513353802594	0.121158851745437	0.324576850317795	0.274561086316281	0.14839202775597	0.259306176228494	0.260866550345619	0.232138763315924
Zfp622	grey	grey	-0.0371411825230224	-0.0776409341184565	-0.0790106907024355	-0.0243153421438545	-0.0321046070190836	0.0508439818338613	0.12131816276751	0.0657335360307365	0.0602232899612539	0.0917750685996574	0.0914218285926736
Zfp131	M1	yellow	0.00828869748863278	-0.0379981481295705	-0.0975345957435678	-0.0446308248708141	0.0591324514207637	0.0894644879618847	0.0635235464659738	0.0771441755904261	0.0877358513032707	0.125355034352328	0.103306455444655
Gusb	grey	grey	0.0418050979631832	-0.0555271516218644	-0.0914808458819207	0.00409688679444977	0.0509908656266885	0.0376366194840015	0.0501244873020884	0.0424332841342646	0.0408727335313669	0.0575395696165735	0.0546194059801614
Ap3s1	M7	turquoise	-0.26815727835763	-0.14762120074034	-0.146621210562944	-0.125976365559191	0.0944382161845475	0.255073844859156	0.250853504653472	0.111558839407433	0.193866311030083	0.240474393612419	0.228021083238959
Lamtor4	M7	turquoise	-0.267282789131873	-0.170983704542479	-0.157032313660284	-0.113663370214057	0.10113431895097	0.271559579384246	0.198566866550559	0.120270468689848	0.176817013073847	0.242065059443901	0.175056099028418
Ifih1	M1	yellow	0.0833335237727527	-0.00823295558209156	-0.0311394285873346	-0.00812783536454201	0.0316601265143157	0.012744357667954	0.0214191034221883	-0.0342869729136989	-0.00470055152809624	0.040783590132192	0.0391472787682037
Sclt1	M4	pink	0.00965339231351323	0.00405355625137839	-0.0160465791301263	-0.0016592123212682	-0.0109747266597211	0.0278583962274064	0.0126367268444282	-0.0129301583269504	0.0133262626624144	0.02213581795113	0.00118993605328576
1700020L24Rik	M7	turquoise	-0.102372207351844	-0.0203277513182111	-0.0324025756026411	-0.0433220958411915	0.0514545815134653	0.120279439933959	0.0958761300491244	0.0223140799823149	0.0432264122940425	0.0804247842108958	0.040174126658148
Nelfe	grey	grey	-0.0793140809754188	-0.0335217134541965	-0.0316827855979026	-0.00520460799610276	-0.00107537849379822	0.0374299920762013	0.0283621035425704	0.0340762438278676	0.0557994505365044	0.0578993081809728	0.0571265927242467
Slamf6	M6	green	-0.031490899275951	-0.00844013569144799	-0.0221334579206717	-0.0296569906343234	0.0839478074115391	-0.00823192411204659	-0.00446154695559853	-0.00384252347679738	0.0587039053309201	-0.0221560422986798	0.030515995255875
Nr6a1	M4	pink	0.00647228141702441	3.20061052411938e-05	-0.00383150845135071	0.0311596239206257	0.00769941956462778	0.0347217827795816	-0.00799431512155063	-0.0321030179496692	-0.0158751728117458	0.0131526219566734	-0.022517603638039
Ssrp1	grey	grey	-0.0370073142753733	-0.0700371667467923	-0.0384740445057668	-0.0381333185073316	-0.0333060663404838	0.0627329394832153	0.0796788672210891	0.00830244875833342	0.0218064917830121	0.0825282901897765	0.0521845171090866
4930579G24Rik	grey	grey	-0.0343625858216841	0.000908000904613709	0.0259609563703532	0.0149484971909716	-0.0278143858738469	-0.0138966599488528	-0.0241050162952312	-0.00657653567674366	-0.033049381567204	-0.0148088418666495	-0.0314264857861616
Rpa2	grey	grey	-0.025983176124815	0.0256699755576707	-0.0128181722983797	0.0134772932286335	-0.00154267695765227	0.0196249467716306	0.00594320594953216	-0.00877777496059708	0.0264346225228688	0.00908208290119083	0.0103257702754109
Hpse	grey	grey	-0.0773098599044013	-0.0292444818457479	-0.000494918963492994	-0.0227608597386473	-0.0109163702124894	0.0417530824661402	0.0255698517771986	0.0137736165982678	0.0389457134749039	0.0293681408284764	0.015281601250304
Nhp2	M5	purple	-0.0287906197858713	0.00577092161269614	-0.0510673520467869	-0.00890068242397757	-0.0107116274410724	0.0125106426774759	0.00939614302985349	0.0383284849914904	0.0112976407239427	0.0284582110913409	0.0362816577200128
Mtss1	grey	grey	0.00933488466993632	-0.00914297194666196	-0.0196417968151051	-0.0374475273973207	-0.0138584001702438	0.0751099354637529	0.0240673857044536	0.0386312922083573	0.0387213412708614	0.0215147444435876	0.00985562067572902
Sdf2l1	M10	red	-0.0428957513386332	-0.01521315041252	-0.0124664006665733	0.00987619297991765	0.00974699630952938	0.0483409045477574	0.00177880688662961	-0.0210493003859699	-0.00130234455973559	0.02742169451743	0.0259417427528423
Wnk1	M1	yellow	0.11314367008241	-0.0617004990657954	-0.0917159244979747	-0.0461645243261353	0.0596147141469113	0.0626756843741245	0.104638734001373	-0.0411202805273152	0.111385637788753	0.149025581240517	0.134611460152834
Mef2c	M6	green	-0.017391440858438	-0.0163755942434767	-0.0355706940254906	-0.0417013866289337	0.0609787155982305	0.0162399423294967	0.0149499326391712	-0.0126128534953418	0.0672553854208054	0.00183591670708573	0.0519456720390567
Ik	M9	blue	0.0665126251186109	-0.0344267603603977	-0.127563881116171	-0.0315147236612129	-0.0112758983771714	0.0559462788181684	0.137209578067769	0.0503770545726535	0.0669259484666147	0.172004147081348	0.107665955491607
Mettl9	M9	blue	-0.281284753992177	-0.150037951782692	-0.161688050885922	-0.134157661889839	0.18015474807609	0.315883094893014	0.277732851410896	0.0786682281901953	0.184388038723897	0.286795433145532	0.211113976481931
S100a13	grey	grey	-0.251470186232227	-0.0984543281234605	-0.143611446232105	-0.0901964858816438	0.118637552607001	0.248663846742067	0.243835399426789	0.0514985036621576	0.138222289016285	0.269015430854638	0.177923730610256
Isy1	M8	brown	0.0622461769274637	-0.0411913317515912	-0.0493679527581744	-0.0261918031724122	-0.00537769706263214	0.00176058874985553	0.0810215212607003	0.0542517756571	0.193635676578683	0.0344082939394079	0.0439042829633789
Tagln2	M1	yellow	-0.0498249813541906	-0.0594546630631148	-0.142789744494555	-0.0402368101439542	0.0291948866838637	0.158058576523489	0.121607941277252	0.072898841272181	0.136290046031759	0.202130172061333	0.124931328065169
Ccdc173	M4	pink	0.0315580542215198	0.0139528817779867	0.0116969641605819	0.0375989992230855	-0.0294274446269932	0.0438865519874586	0.0247740335875244	-0.0412220718994506	-0.0226457947704092	0.0293843077824804	0.0139310686170945
Wdcp	M8	brown	0.0135184690364902	0.0205760640747934	0.00406701118653458	0.00555558500872628	-0.0412180809042066	0.0261049937557657	0.0217558863887016	-0.00522562108347814	0.0339110720688238	0.00414759878477004	-0.0141738161161117
Daam1	M8	brown	-0.0373895244378427	-0.0519510952299111	-0.0119441235310772	0.00992428623460732	-0.0269044720168936	0.0774155223256092	0.0816914385108492	-0.0249010137831223	0.0587161612464233	0.0264263366832449	0.0528977164854308
Ifit2	M2	magenta	-0.0652612538305032	-0.00462467111420156	0.00788209929103552	0.00748271058697582	0.0327514147349909	0.054283955946438	0.000626623625073245	-0.00518228128898462	-0.014427507766945	0.0269208512840681	0.0290434915043569
F3	grey	grey	0.0669178125786483	0.00814279884112144	0.0352245084572605	0.0142885346495601	-0.0159788944401952	0.0200525508079042	-0.00153300654841339	0.0397590875274756	0.0102278215961318	-0.0174066884301359	-0.0443163871899671
Upp1	M7	turquoise	-0.199738364042792	-0.150783792847171	-0.210624286182557	-0.144237068122454	0.0764818375443136	0.238445662653939	0.24000647352206	0.233808755060958	0.218142101290148	0.186748402834209	0.179715261550928
Gbp3	M2	magenta	-0.00439530215039679	-0.00756605854668743	0.000364648763097432	0.00838156756899706	0.0475635460739385	0.0524153251477202	-0.0305247106061404	0.00632512016635237	-0.0246516741740539	0.00874433862006614	-0.00823125025833606
Olfr373	grey	grey	0.0562704185377076	-0.0135826973479229	-0.0265717121661487	-0.0267925934630833	-0.00669024768801393	0.00627089045106214	0.0197161844863889	-0.037927572484404	0.0219753550206512	0.0352490196324756	0.00362168687115899
Ddit4	M7	turquoise	0.00147130007238384	-0.0412160503561204	-0.0623681327182237	-0.0584402814029222	0.0313091740158689	0.0828244336320818	0.0160848735652819	0.132505065844447	0.0380442061194328	0.0304307834148116	0.0479180478306759
Slc23a2	M10	red	0.0769450723734846	-0.00512071489070418	-0.0174135707703172	-0.035252525709319	0.0173383611501573	0.0199334834359443	-0.0285232604509335	-0.0108995290807962	0.0450051222844352	0.0372956631258878	0.133417158165043
Il12a	grey	grey	-0.029771011548769	-0.0702419835255038	-0.120787383446742	-0.0526725616991627	-0.00155276592380883	0.0501573428206146	0.0613226837857844	0.0933136443811293	0.0133465516097683	0.0517090492564198	0.0371755939413017
Crbn	M6	green	0.00938609843763205	0.0238116180290578	-0.0549611844772627	-0.00934683238077401	0.0534557338277968	0.00198073457733691	0.0972558157202085	-0.0108525158063663	0.0313588161174112	0.0422555327910048	0.0404612989208572
Rpl28	M9	blue	-0.189886725244968	-0.106682801293843	-0.165183637797657	-0.0817354656453454	0.107023950780597	0.263404694480873	0.223433795286403	0.113250228530233	0.191022703474068	0.289503522342544	0.181764743712113
Tmed3	M1	yellow	-0.181721911121046	-0.0773317706786738	-0.053749439529414	-0.0370343696068379	0.0915014123506874	0.153867876678835	0.112052764125141	0.00162139140858825	0.0607068308867128	0.129823968966202	0.0681293983127543
Atp5o	M7	turquoise	-0.18465993693318	-0.0332811939947066	-0.0408669255323829	-0.0416140503496411	0.07209124057404	0.158007792442098	0.0934173855747892	0.0491240460050657	0.073249801336543	0.119173198372841	0.0579387838749582
Rhob	grey	grey	-0.0668693674820691	-0.0365211448811072	-0.0132288657445173	-0.0310245461872267	-0.021282405763054	0.0805888361168997	0.0840691335647527	0.0137864839611911	0.056828220871437	0.0555841715245604	0.0530966953744448
Triobp	M7	turquoise	-0.277789251269937	-0.180738967919056	-0.163815198098422	-0.139210913718527	0.128337397361095	0.302025200030605	0.300396539235088	0.108043997699593	0.227945213718206	0.274851642630845	0.224052982143931
Ifi30	grey	grey	0.0125403113863544	-0.0465288010161614	-0.00217381567970652	-0.0408296150391977	-0.00434549279717833	0.0594800320633935	-0.000445278930809355	0.0586611981900796	0.0629737275712027	-0.00323556968980152	-0.00499694468193115
Tram1	M9	blue	-0.0476022471696124	-0.0604452462504257	-0.0366944154374086	-0.0344505001030913	0.0540368809768076	0.122898375768139	0.0504595779439816	0.0172173953813007	0.0247362223447076	0.142996639594136	0.0421513405519212
Naca	M9	blue	-0.181618324068626	-0.0857613678932093	-0.124871864839015	-0.0655150905587862	0.124583027483741	0.231255101969521	0.214698255523024	0.0662271529633999	0.144999613724588	0.287096774135997	0.175643411122914
Dnajb9	M1	yellow	0.0061399932695509	-0.0565288932419773	-0.0974701421927156	0.0107162129976389	-0.0197587756086963	0.107775656302302	0.106743161119326	0.0228485076486399	0.0803722492408209	0.130224024411709	0.0742436538418833
Nop53	M8	brown	0.0159381879284002	-0.0316779445238226	-0.0559534265514764	-0.0102516969192451	0.0325351618936058	-0.0226062056453735	0.075428904659518	0.104603403628539	0.226992432602038	0.00026495518153524	-0.000298756735404723
Atp5h	M9	blue	-0.20494299191571	-0.091037462945815	-0.110201748920362	-0.0744320264479564	0.104590107928527	0.2432414614603	0.209616955936095	0.0514333664376946	0.111945676776914	0.238674913620796	0.139448244311384
Usp37	M8	brown	0.0373523694525062	0.0304564126422207	-0.0730689841466745	0.0195033249392697	-0.032732084138842	-0.020408709978458	0.00652003477013785	0.0331125243872953	0.122886714595864	0.0180439601745454	-0.0374157911274574
Tnf	M1	yellow	0.0667158819802975	-0.0383707083488265	-0.0578527258811141	-0.00669812937613891	0.0119994981667913	0.0846113952444292	0.138376047092122	0.0102033966190394	0.0717556371107405	0.117505907886544	0.118067512961472
Egln3	M2	magenta	-0.00138966910985251	-0.0743164587468946	-0.00015669169416489	0.0186723905531663	0.000487756945548114	0.042924014661802	-0.027016461388494	0.0716500030963786	0.0228289985112855	-0.00681799633592497	-0.0344196823766625
Prdx6	M8	brown	-0.179427033380617	-0.0837809527163916	-0.163746844526911	-0.104286835835231	0.110887509694512	0.228096199335892	0.194163057711538	0.117398533012838	0.275522303481087	0.212116960734993	0.176695195371729
Cd2	grey	grey	0.0322125807629904	-0.0476375668468965	-0.00566116833253007	-0.00520229152584418	0.042525124632932	0.0247685973780811	-0.0131935522050697	-0.0188599730000371	0.057897820736219	-0.0146425033825399	0.029685189133671
Cenpj	M7	turquoise	-0.100903601586324	0.0165729034384381	-0.0092694507739196	-0.0171248517866013	0.0437923147325203	0.0850714231921469	0.085835066860237	0.0281879219933225	0.0219694909235112	0.0591522426998355	0.055138055670786
Paqr7	M6	green	-0.0690242703376939	-0.0146766236331148	-0.0197635344234248	-0.0166149883898578	0.0625119512852873	0.0595686281912836	0.0439844724985123	-0.00307798543996242	0.0788285593150402	0.0700096139534733	0.0504852779728525
Fem1b	M2	magenta	-0.0120305261675806	-0.0598114632209964	-0.0427005351704125	-0.0658766493922507	0.0760653001966724	0.0260067875842753	0.0122361235634537	-0.0107885373709754	0.0213313024918805	0.00467873114293056	-0.00307224665229371
Ccdc88a	M6	green	-0.0436828719331032	-0.0479037958609162	-0.0546972997943754	-0.0992270146609918	0.069311941805627	0.0965686736164177	0.0932976718483624	0.0181500121556108	0.10787448510583	0.0788970588877638	0.078333760670192
Kif18a	M5	purple	-0.0115893808829162	-0.0119403009709882	-0.0492003691019333	0.0605713222964566	-0.0304276178380257	0.0834696239593359	-0.00298196642235678	0.0422222829615933	0.0351353132349105	0.0377225496659126	0.0263279936688539
Ly6a	M9	blue	-0.0339346489367809	0.0388511198207355	-0.0411707760003298	0.0545601096754957	-0.0138220270460431	0.00813121350874447	0.0355983458908655	-0.000870264072397529	-0.020684062297514	0.0397500864931001	0.0107018712407852
Gm14010	grey	grey	0.0843557329594204	-0.0701180446942012	-0.0829947907970989	-0.0318783348894088	-0.00965687843374416	0.067693473831672	0.0423962660247787	0.0383802801434982	-0.00332592109421865	0.0937828853478976	0.0213715222715435
Rab3gap1	M9	blue	-0.111343020484155	-0.01021143230056	-0.0279321014153293	0.0194301367761972	0.0535397763937026	0.116219235182159	0.0909592863102046	0.00359676821113542	0.0715735620353036	0.136590112143927	0.0348404743720366
Il1f9	M7	turquoise	-0.130030362509166	-0.130401159869479	-0.213156607650711	-0.136056958487062	0.0403902961281353	0.177205894104602	0.149440213318236	0.228843232525354	0.152605104725147	0.100197866863436	0.114281543629232
Bpgm	M4	pink	-0.0186842368404411	0.0513309098363358	0.00405187490773219	0.00915473943079607	-0.0275775577171776	0.0374302292075083	-0.00824565059523207	-0.0259737979724804	-0.0456094286136405	-0.0119638074235917	-0.00773356892380166
Hyls1	M10	red	0.0472775253418172	-0.0214521800145574	-0.0344702225722473	-0.00882659795908838	0.0278773136450535	-0.0223129894708479	-0.00324187049864066	-0.0435102099383791	0.0169695066501238	0.0412880105050857	0.0518082615406672
Ndufb7	M9	blue	-0.268863976227988	-0.146996018659869	-0.145126601657112	-0.102199818048775	0.12697101167446	0.257745408267272	0.208558397010312	0.0740213204377839	0.165530900281447	0.258732626006804	0.14945835846499
Tgm2	M1	yellow	0.275835997336776	-0.0172996617329543	-0.0635538857577482	-0.0121214207550581	-0.013183323389977	-0.0304319670392846	0.0872043539829094	-0.0135501999820378	0.168078424394879	0.0507615876895103	0.0410809444198385
Dok2	M8	brown	-0.160951559946638	-0.111761774069735	-0.114448018301227	-0.0874957809998786	0.0767545324289701	0.173349471655515	0.146842600404993	0.0124372579930029	0.166853404373462	0.13867776778553	0.126007765115918
Sqor	M7	turquoise	-0.273087402828154	-0.167444573008683	-0.130475349168194	-0.118347630303361	0.0842491935347856	0.283741551886791	0.23105770698557	0.117889917248103	0.202107087225834	0.248769588237807	0.1720516481766
Sod2	grey	grey	0.0315371023899008	-0.00666240905845469	-0.103973874865463	-0.0645918538201722	-0.00299889950826987	0.0838065671140059	0.100388079444138	0.112044448470543	0.0592376855571726	0.106283823740108	0.162034850445971
Abhd5	grey	grey	-0.164197118268785	-0.0927150948578096	-0.12235303021422	-0.0394128519232686	0.0225816759140487	0.191373936759045	0.155392735978395	0.0769631607711555	0.13950173965928	0.174108086045018	0.123843995813889
Ctnna1	grey	grey	-0.117160117650423	-0.0546491332670143	-0.057250931884706	-0.0479936238759229	-0.00157174127626118	0.0827987342936742	0.0861858749988162	0.0228230844061761	0.0924836478433231	0.112809323514705	0.0798720887874806
Lmna	M8	brown	0.0404236874178173	-0.0050604356774462	0.00990892622680706	-0.0346211133176634	-0.0302725565016627	-0.0417499405277896	-0.0160591559255116	-0.0041004702103062	0.0612075923044175	0.00391810777465787	-0.0442336941242518
Stk39	M2	magenta	-0.0873190072375531	-0.0848449696584586	-0.0605610753683392	-0.0293153815192887	0.0523105537426817	0.104599476707364	0.0658187237735115	0.0261970305631323	0.0528594534443009	0.0480303915448281	0.0487648365635672
Dnajc2	M6	green	-0.0129909540816226	-0.0298343977983573	-0.049493114201579	-0.0766435662576208	-0.00105907797852901	0.0548477677337622	0.0605180412217019	0.0208702087788949	-0.00428458502609532	0.107003004299339	0.0294608937218737
Asnsd1	M7	turquoise	-0.261198160154433	-0.132207037826223	-0.138785571182857	-0.155657680822545	0.134193560528531	0.260185844225709	0.225873623690906	0.0972306476724499	0.186440870985564	0.20022753794805	0.154746270459571
Sept1	M1	yellow	-0.139875754800568	-0.0429371246168323	-0.0168844742228616	-0.0304950457635811	0.0975203409209663	0.175961478885489	0.107389316669941	-0.0234707658816719	0.0849103401615329	0.131044926440488	0.104639126393453
Pgam1	M9	blue	-0.214395322480178	-0.0728660838646571	-0.0919122287786473	-0.0623289136821512	0.102472772404838	0.260541419415438	0.222096064926492	0.0688700160173761	0.0976678661778791	0.224175000680105	0.157891080540141
Mrpl45	M7	turquoise	-0.161617359551343	-0.0588538406685461	-0.0561558248407344	-0.064273581831319	0.037054617184714	0.213340829912236	0.175967381835982	0.0775403801229401	0.129306757091017	0.160100972095751	0.10591700210353
Mphosph10	grey	grey	-0.0826255429319479	-0.0264546654183849	-0.0387592376326228	0.00340052829196084	0.0243455122585292	0.0979230612060623	0.0630730270685856	0.0280790383066542	0.0377109527339248	0.0646490620261443	0.029913012654529
Cystm1	M8	brown	-0.0603836495302722	-0.0287279402388315	-0.0414559149115028	0.0386066922434039	0.029911310520505	0.100586661569912	0.0626395595186122	0.00727385666884874	0.14771682918606	0.0368495750965068	0.010622713275167
Clic4	M8	brown	0.0309372251723917	-0.0730596653209595	-0.0235604889467453	-0.0665633557414515	-0.00123520344181964	-0.0188999427565929	-0.0285972604552104	0.0171383998084009	0.0996117146718387	0.00733555415961293	-0.0266262946402197
Tspan32	M4	pink	-0.131221351277813	-0.00407975828340388	-5.11490758155309e-05	-0.0119521962773932	0.0859413279000822	0.141054263468972	0.098007466778409	-0.00717503100926321	0.0450425760889604	0.104305780061488	0.0618122061635842
Tsr3	M10	red	0.0382846353284737	0.00243588697557299	-0.0510850352125196	-0.014598946458927	0.0249566589106377	-0.0100495313993162	0.0379489620581138	-0.0267023123946665	-0.0119829897442089	0.0880886837569057	0.0214275331766371
Cenpu	M2	magenta	0.0134307882790002	0.0708424808187055	0.0528909177354115	0.0508053836546763	-0.0185308674465116	-0.0537768781820193	-0.0219417191550776	-0.0360506735638177	0.0106467942251543	-0.0131602680582228	-0.0196614200335712
Dhrs13	M2	magenta	-0.0551299221554306	-0.00901238817168212	-0.0109180689532819	-0.00318137439985277	0.0060655982828693	0.00747444914823325	-0.00059882523584531	-0.00699365238973375	0.00398522963126763	0.00948987468372478	0.00888721646142357
Cdc6	M8	brown	-0.0183421294014755	0.0265378184520354	0.0154349416047103	0.0128538535844958	0.0132348754190266	-0.00945889475961644	-0.0333385542763312	-0.0156827493572166	0.00620915463564352	-0.00994192438913538	0.0175028715137905
Rrm2	M8	brown	-0.0387229724860972	0.0238545400933598	0.008424749657573	0.0106828895480466	-0.017765221126308	-0.00946332596974816	-0.00902675393024942	-0.0030655087787126	0.0251888455707185	-0.00443803281282202	0.0211745838428334
Ccnd2	M1	yellow	0.13125617892039	0.0437476282940659	0.00129134794455325	0.0020510209441735	-0.0117023528146897	0.0052357830683932	-0.034696869709248	-0.0435663961709791	0.0191254320866806	0.0637533227789646	-0.0213902976474726
Cmc2	M7	turquoise	-0.0779836506047837	-0.0506376677342326	-0.172363170614079	-0.0837498538297153	0.0327172409886674	0.123069979791093	0.111782291459995	0.198376498358639	0.111393587357369	0.0652362473468443	0.0859275722883612
Ifi27	M7	turquoise	-0.197450330385351	-0.115121792908669	-0.101825159484923	-0.114266116988616	0.122884123637045	0.175906477809849	0.143872700691342	0.0995027654023333	0.13829592645232	0.128291184474434	0.110994125094553
Atp5g1	M6	green	-0.045253671185482	-0.0343834412601772	-0.0561809811266954	-0.0529249413082943	0.00874846822717185	0.0299000665572457	0.106380891984444	0.0138106881072867	0.051884520800543	0.0504599342217937	0.0603717749294855
Zdhhc3	M7	turquoise	-0.255620558571577	-0.129715145585852	-0.120316341408328	-0.147266005599215	0.0795139221472521	0.21908714034349	0.170837126384812	0.110258413565876	0.177948477367661	0.139761045961129	0.165167012572622
Klf9	M1	yellow	-0.0155437998609016	-0.0620193652304857	-0.066954501972195	-0.0410775462301957	0.0463989690781876	0.102012823399887	0.070415846267372	0.0175078237663384	0.114446573197979	0.085542524082399	0.102637040885533
Tceal9	M7	turquoise	-0.0939435536549806	-0.0211606601818645	-0.0789001241832725	-0.0745945213323262	0.00274895268353134	0.111141630632563	0.02379797027388	0.131804116871665	0.03754911455627	0.0321735515852216	0.00408395434812222
Got1	M6	green	-0.159895320171283	-0.0818936710975213	-0.0275030250144375	-0.0656478895478571	0.104078863458875	0.152101699275433	0.161248349549771	-0.0297998225390087	0.112256108372853	0.128077098123171	0.115342219431371
Tbc1d8	M7	turquoise	-0.193936802003802	-0.0714639249809534	-0.0207884901603875	-0.0315551806797837	0.058557874643937	0.198808552612027	0.109863697538198	0.0193325497455948	0.0925795924972285	0.146419677015654	0.0972115044757039
Rpl15	M9	blue	-0.183522957166462	-0.0690007832069236	-0.153914887550542	-0.0807577350951286	0.106897140291108	0.223761335736273	0.172558546730611	0.118536751894751	0.144151594628265	0.227474007362741	0.113364690976962
Cflar	M10	red	-0.121609062817821	-0.0440730969979093	-0.104491932195496	-0.129022767876069	0.09516601871265	0.193213123254805	0.161160851991244	0.0810105219115063	0.115538910914556	0.164191284300373	0.257966274600895
Tnfaip8	M2	magenta	-0.139077078405413	-0.311188825967876	-0.106548955352571	-0.143220334144528	0.0781628498459081	0.23633282255889	0.128596923001163	0.0814664922283395	0.158787583686482	0.144669014345212	0.144377627970841
Cox5a	M9	blue	-0.164030117723873	-0.0532117428472356	-0.110515069543787	-0.0611868137602241	0.0984056810942255	0.217801648908504	0.172616568078525	0.0333197947557002	0.0914496302099978	0.227293889026709	0.166409129647518
1600014C10Rik	M7	turquoise	-0.108348211025784	-0.0388355188509211	-0.184686942189804	-0.0726624684773976	-0.00292883803888119	0.20851749662703	0.133203627103098	0.265373590277951	0.0265690427194874	0.136051285583551	0.0889493186084501
Ccrl2	M1	yellow	0.590225211999392	-0.0417942021535469	-0.0048443113647758	-0.00765715488591634	0.0790939233176853	-0.0561441642713639	0.0552542221124675	-0.115731839945451	0.0299146603004476	0.109208582360538	0.103167134908288
Otud1	M6	green	0.0346078154691272	0.0126731744198073	-0.0141021172876841	-0.0678992761998851	0.0555059423255452	-0.0285404284616216	0.0314207658581233	-0.0215957353770874	0.0808615393069245	-0.00588854653764379	0.0259038921525885
Fmnl2	M8	brown	-0.0800697203180468	-0.0310782317300348	-0.011958779467002	0.00315036044174841	-0.0166509701726155	0.122480537371178	0.0425219753337511	0.0261274452774771	0.0497249336460739	0.0738566060368369	0.0579075583446299
Ttc13	M7	turquoise	-0.102667051171199	-0.0160050243327691	-0.0393327509394125	-0.00287633319824488	0.0669377115847003	0.124281647502432	0.0489477175120667	0.0316669622821567	0.0437269576990748	0.0322723104481259	0.0324019021952275
Dnmt1	grey	grey	-0.110164413178083	-0.0141422170415776	-0.000724666382562963	-0.019828716455347	0.0637602130663833	0.0915089399392841	0.09253210269023	0.00764667041425776	0.0423930066757476	0.0796841590957336	0.0613961229142946
H2-Eb1	M8	brown	0.0156275330005667	-0.0256668643882048	0.0203383402451893	0.0264861971403217	-0.018890547237957	-0.00950168343298173	0.0284055147459381	-0.0337480978095831	0.0871772775637789	-0.0200080692211331	-0.0183867998367292
Hvcn1	M4	pink	-0.123169630132326	-0.0321662631904176	0.00210753970222888	0.00420553085496862	0.0465390465105222	0.108232027087792	0.0557305745746508	-0.0173719244257825	0.0113526857246277	0.0859189417792724	0.0263550635707624
Igf2r	grey	grey	-0.000546103127881136	-0.0321314219546433	-0.048153933517133	-0.0400305472115723	0.0651838089664053	0.0509045365888894	0.0320627342966627	-0.00240413714435682	-0.0193321201437433	0.0606108459723207	0.0835283339378831
Abcc5	M6	green	-0.121791951357427	-0.0618626030441492	-0.0370274192000236	-0.024422590685545	0.0663879763310062	0.097701314192533	0.0920384591282508	-0.0161126212179384	0.0800099086412547	0.0905570268171552	0.0761760676949002
Ccnd3	M7	turquoise	-0.313853492396493	-0.202188392485223	-0.204110544507322	-0.13831063169316	0.125865007902984	0.354680567304857	0.252782011257442	0.208702522166408	0.263269801359763	0.23657655810633	0.216165657644892
Plp2	M7	turquoise	-0.292087291039606	-0.176282526053694	-0.189265837963401	-0.156169423923938	0.136975718611535	0.308523151383078	0.239532016162002	0.189741796850815	0.245690609234957	0.232980546119853	0.193038966543404
Fam241a	M9	blue	-0.170409565958148	-0.0461694383502524	-0.080699110289741	-0.0334175467827475	0.116309276069094	0.144916712026287	0.10095613159036	0.0267520210290268	0.108366239711334	0.166724707583411	0.107388749623654
Kmt5a	M7	turquoise	-0.231039752684832	-0.0966040806661583	-0.100338863114093	-0.0602729097508566	0.129765473441368	0.253820872382218	0.199246437975148	0.0526131520257077	0.125565262683555	0.207622422905216	0.165523947541674
Dad1	M9	blue	-0.027077768449726	-0.0229767133850906	0.0103455320639826	0.0202253217704043	0.0578167020257274	0.0786398638752992	0.0304030705038674	-0.052086691463148	0.00172572551020756	0.120370401194749	0.0654224907309968
Vegfa	M8	brown	0.0212007803966949	-0.0936532975521572	-0.0644680770503748	-0.0573693931169594	0.0281558563254142	0.0788174621131683	0.0470093727274594	0.126372377402375	0.182430797902095	0.00876181323771664	0.0574369563641044
Rpl23a	M9	blue	-0.169693019012384	-0.116605275350465	-0.151702613377676	-0.0766118860550026	0.101191623322624	0.257134478212424	0.224588546141725	0.0719029951571068	0.120619206499207	0.306097032107642	0.186097016995239
Rpl31	grey	grey	-0.173187135320091	-0.0683349818218427	-0.146426736673473	-0.0695507770963491	0.130136353685939	0.217093253888763	0.168033888241066	0.0774873487425912	0.10536486164813	0.19582087324067	0.161035218179874
S1pr1	M6	green	-0.0186155234325386	-0.0337860762780147	-0.0287522197196994	-0.0688835928436022	0.0157545921645541	0.0246059810865884	0.0528225592466378	-0.00929049089561994	0.0565252399865386	0.0136830938898293	0.0702469060081053
Gmnn	M7	turquoise	-0.0524432455755075	-0.0399436086960653	-0.0129939777899492	-0.0429361358291796	0.0230495172173369	0.0176638789397078	0.0244039722744564	0.0282065861485213	0.0265104613238373	-0.0132916197836985	-0.0199125118618676
Ppif	grey	grey	0.00745033323582444	0.0290385077509455	0.0331825991221835	0.0292287628391213	-0.0218108414795176	-0.00288854350623131	-0.000214103648889823	-0.0273147552528244	0.0314072928824418	0.00556010451078678	-0.000455781776560835
Epc1	M9	blue	0.0328236976090518	-0.00193913326739288	-0.0680381455831636	0.0144216161027897	-0.0018255968908568	0.0498503449698956	0.123781661452703	0.0360087466116486	0.0443054054327793	0.120445436325406	0.052437025276
Snai1	M5	purple	-0.0832430602306497	-0.0741679477085669	-0.16506278820618	-0.119769913931872	0.00377904536147439	0.359270619880837	0.0865219558073573	0.182589701171489	0.0481356883372432	0.0888700569563337	0.0687866535736038
Scgb3a1	M10	red	0.099670083078916	0.00146961611765277	-0.0321262602066716	0.00210185419297815	0.0031550063929681	-0.0245273183612895	0.0497113312887916	-0.0815192989807007	-0.0704658985006541	0.0943117053941959	0.0644405444864604
Atg16l1	M8	brown	0.00403621935068049	-0.0157058814785551	-0.0248169803313	0.0153569709076092	0.048212243861004	-0.00341351424298869	-0.00129279847151869	-0.064782514597822	0.0922585330437999	0.0387445739538198	0.00909966999170864
Cdk2	M9	blue	-0.133622999653336	-0.0755142714792979	-0.0230729422953009	-0.0329824565094332	0.0872074785388928	0.134187388370892	0.137546171799816	0.00643437810288875	0.125971737116164	0.156356467465309	0.110052069671697
Ets1	M6	green	-0.0973354399671259	-0.0614773708023368	-0.0325250796297291	-0.0470189978508263	0.102864288139846	0.144786856720376	0.123008639717379	-0.0209643985296921	0.113342250927222	0.0933571159746382	0.0690359282072451
E230032D23Rik	grey	grey	0.0419929978610621	0.0080925677637972	-0.0191399358674207	0.0147289810948016	-0.00797783172964465	-0.0319841539412537	0.0076366901575247	0.0185674193349221	0.0867964034337638	0.0532129204202752	0.0559176166972847
Foxp1	M9	blue	0.0568252709590574	-0.0577322713600263	-0.106012522792038	-0.0428880029803551	0.0584918833498698	0.0484540823514167	0.0683186553040755	0.0307707044732574	0.0896302661617234	0.0696765728391662	0.0770912286863305
Nup155	M3	black	0.0405346326413367	0.00545625757461787	-0.0406113122633054	0.0506038445200104	-0.020660016628165	0.0293932206171168	-0.000232744503611085	0.0296273423819116	0.0189661276030897	0.0109922168210574	-0.000236984197302066
Gyg	M7	turquoise	-0.262984415063637	-0.144510415613169	-0.192883047838449	-0.135805196497054	0.106418380949977	0.287269301507854	0.234505838046215	0.180369664038259	0.229806413032547	0.228896177749789	0.182914227389725
Errfi1	grey	grey	0.0590883241998551	-0.0162392355640347	-0.0678237436658371	-0.0520306313797047	0.0467883763851743	0.0718432062344493	0.0762696269910349	0.0181233219622981	0.0559288411753409	0.0509544244222281	0.0504008218870657
Hspa4l	M1	yellow	0.143258352967377	-0.0497438331674742	-0.0176555714675351	-0.0775444727356175	-0.0134641903737288	0.051832909618219	0.0759672419111482	-0.0170293631407185	0.065935263294312	0.102608446594601	0.141932429186375
Myl6	M3	black	-0.118242618726978	-0.0794362075761074	-0.359469659890729	-0.360705355146574	0.00780270246549168	0.253360740331587	0.179453794109836	0.394129524057016	0.1771964930736	0.15663789309731	0.14295702580396
Actn1	M7	turquoise	-0.275356409780334	-0.166708196855531	-0.210874127394248	-0.159764207037121	0.157613470363807	0.317438048646739	0.254439565990013	0.204911132458629	0.279996342661323	0.219346433154707	0.232164321407347
Rpl36a	M9	blue	-0.00976983997059245	-0.0392887647814678	-0.0733991475109748	-0.0366371964539353	0.0365904313176782	0.143898343457983	0.0796618277233844	0.0210211182463355	0.0855307482775018	0.12814066374759	0.0876224438049539
Abca2	M7	turquoise	-0.0814588998413012	0.000518435151462488	-0.0186641765457573	-0.0278703617386045	0.0323407958607997	0.0775028591889028	0.0533516911042245	0.0122531193509147	0.0649272211290051	0.0574042108172938	0.0242766843971798
Zc3h6	M8	brown	-0.00887947230766219	-0.00710435111153151	-0.0120222536478841	0.0160058304791368	0.0155400777967998	-0.0275251034359903	0.0101001204209311	0.000773645274647897	0.0415340848193376	0.0154712280027017	-0.0156863788069988
Gm32401	M3	black	-0.010650921135744	-0.0119404670542704	-0.0288475564494889	0.00451598464841511	-0.0260134741379948	-0.018283257318016	0.000372896372774436	-0.00090724002533995	-0.0332495004418198	-0.00692344303063453	-0.00283323825465807
Wdr70	grey	grey	-0.0115118156738772	-0.00906312460293314	-0.0652548856379945	-0.0720614520677857	0.0343388700878643	0.0744952576154377	0.0142547380285262	0.0195234645253682	0.0295037247453581	0.0642935944811497	0.0456901719691554
Snhg4	M4	pink	0.0237181283535322	0.00381435502057948	-0.0157101565705957	0.0154311839706316	0.026672567485108	0.0605227316708469	0.0273405214797824	-0.0106314998347024	0.0322372753586503	-0.0294839657816159	0.00412997812931499
Pgk1	M7	turquoise	-0.29661516102097	-0.133958246297987	-0.149420838042451	-0.132565478762047	0.121628889756752	0.28166237049455	0.225862622635195	0.180972010854454	0.210408218348934	0.212704753390366	0.166542755567251
Tob2	M1	yellow	0.0467438881431386	-0.0670573309061245	-0.046399504603157	-0.0738116931474313	0.0430402312110977	0.0158984807368506	0.015561202257285	0.0291512709964605	0.0812719138354597	0.0339563125799106	0.0818946727773508
Ak2	grey	grey	-0.174623019943388	-0.0750518666820093	-0.121005783757808	-0.0600476304983662	0.122617791642053	0.212805851009176	0.204285522551281	0.0456948430563542	0.133950943944643	0.216475512855626	0.140947138229156
Orc6	M9	blue	-0.0503342420206263	0.00716825290188088	0.0068428798056912	0.00751688995648918	-0.00964361929930303	-0.0206709550553007	-0.000209879775762297	-0.0048512427707769	-0.00726256427515137	0.00184993664827317	0.00392470655696157
Gm43813	M9	blue	0.0176006469620063	-0.00398834499095281	-0.0857309496686246	-0.0712236177017222	0.00317465403501217	0.0258711203975612	0.0541535253420425	-0.00864968459290628	0.0538341053135589	0.12882332869184	0.0817417289871677
Bcl9l	grey	grey	-0.0124410744447832	-0.0243228574193237	-0.119818353211212	-0.0344589897643439	0.0241974201230209	0.0667271200898203	0.04686555170001	0.0730308670392617	0.0931789838079724	0.0391666125975458	0.0273318210353174
Ptgir	grey	grey	-0.105540232538177	-0.0775927881929502	-0.0558633776533293	-0.0502940090377129	0.0630748717870941	0.129895740329992	0.096970177585502	0.0042507886906185	0.0932144659302116	0.0758652302262437	0.0990560472840641
Cnot9	grey	grey	-0.0146383558650571	0.0414601175647975	-0.000566259528683299	0.0573911759612697	-0.0167465249980292	0.00648601607801106	0.0670316379024099	-0.046861306067586	-0.0358625456983395	0.0259421292557974	0.0313228695656964
Pcp4l1	M7	turquoise	-0.01063148635322	-0.0116398740540229	-0.0784578493288355	0.00995092053950054	-0.0422350294981695	0.0116644158445604	0.0182560449147023	0.03572811955997	0.0489458707949746	0.0118306600273738	0.0382406666014895
Gm13391	M2	magenta	-0.0224819972291666	-0.0576754326531257	0.0162127875851322	-0.0439630022598008	0.0667615763517311	-0.0529251983820042	-0.0230779609144487	-0.0106547277418404	0.00976446873540601	-0.0342247047492631	-0.0122613676982249
Tanc1	M8	brown	0.0223044548260613	-0.00262180039572015	0.0239861264842934	0.0399490766649146	-0.0462729366523502	0.00503945425713022	0.057444490832472	-0.0193080789807765	0.0108456059515084	0.0266107149780686	0.0131846662376842
Pdk1	M7	turquoise	0.00287843632215503	0.0164874752205051	-0.0663308636126579	0.0188510280694379	0.0127999221373083	0.0619600589428948	-0.0364813869593941	0.0430742848886283	0.000846453741374793	-0.00519384088538148	0.00261569631582
Bahd1	M8	brown	-0.0126717656648346	-0.0151097806237698	0.0334982469690067	0.0181957257520112	0.010977274661737	0.0264341435050381	-0.0128503106382219	0.00815712985702219	0.060788190012568	-0.0221751073127626	-0.0278958256951267
Anapc1	M6	green	-0.00376102951310459	-0.0106211482946617	-0.0567277775243286	0.0267410106348265	0.0124408777823937	-0.0179668823493872	0.0401209451890592	-0.000719471598917485	0.00639695732750236	0.0631806838058541	0.0169123627025272
Fabp4	M10	red	0.0484188136553139	-0.0151209100740053	-0.0267815498106811	4.9333947202646e-06	0.046342382033447	-0.0189431879396235	0.0488928241906299	0.014492966705725	-0.00745593486401197	0.0332387565761747	0.0650146023006093
Gpr171	M4	pink	-0.0127317195937942	-0.0365075350473124	-0.00285069046711286	-0.0813427867109433	0.0550543762983735	0.0617569250336679	-0.0168866311570761	0.0169641456215324	0.0653353031800249	0.0172743196609168	0.00823042689146858
Hist2h4	M5	purple	-0.00672786691388382	-0.00891926318675645	-0.0492110559754906	-0.0271530730208996	-0.0357842052655018	0.0897101889392364	0.0737453196631934	0.0740236059239456	0.0596764060214599	0.0592591651315282	-0.0208287560846322
Rragd	M8	brown	-0.0208499854857791	-0.0432694723495087	-0.0459165084045798	-0.0173270588181676	0.0156934996382668	0.0286180140511039	0.0370987975673892	-0.0122146912909479	0.0436308441495634	0.00601073665853388	-0.0215969975252029
Stpg1	M3	black	-0.0122573074302487	-0.0119228968799364	0.0104802285848731	-0.000360311045982557	-0.0167465249980292	-0.00751069908916333	-0.0336885136883903	-0.000100888607208737	0.0115204073893963	-0.0466032690097584	-0.0334175463394512
Cdkl2	M3	black	-0.0345812843605136	0.0346630458234402	-0.0409470900858603	0.0436240359365249	0.0144316761832218	-0.00180669602163731	-0.0063995682232222	0.0394973707108976	0.0357017097468252	0.0455902341442907	0.0131285863055923
D930016D06Rik	M7	turquoise	-0.0323344240982194	-0.0504964845796596	-0.0440655271725972	0.00636856653622021	-0.0397648268911557	-0.0301409950151183	-0.00136102578822084	0.0665152884144922	0.0547332543656181	0.0126714335644504	0.051948499250458
Rfc5	grey	grey	-0.0371662805502517	0.00887581346697412	-0.0223828722923109	0.0208508315799907	0.00476515294340225	-0.00588242805550721	0.0240616918164097	-0.0215947780433008	-0.0190026569693014	0.0271959068748971	-0.013971436483084
Snca	M4	pink	-0.0398728681367146	0.0558100442377829	0.0332977959481468	0.0436443120922984	-0.0167465249980292	-0.00831947567049772	0.013880804706293	-0.0208539422185675	-0.0327011052125579	-0.0169163653522426	-0.005111693054469
Ogg1	M2	magenta	-0.0218488278783583	-0.0390343124207235	0.0170187152376293	0.0240703254464433	0.0117269725506678	-0.00903261884588525	0.00284970557919934	-0.0372414738033446	0.0304698070324476	0.0316518954014551	-0.0161884072135092
Zfp296	M10	red	0.0448472795797455	0.021863283234578	-0.042351753788245	-0.0241843714435402	0.0177671439731158	0.0473974416045216	-0.00910693257215119	0.00601500739195249	0.0046266311993184	0.0301928284944261	0.00631426074958951
Mesd	grey	grey	-0.0425560478358395	0.00458876352536143	0.0105896056494926	0.0145497020250858	0.015629110100078	0.0639678933044612	0.0232874453010775	-0.0187558044196293	0.0398063011281882	0.0543775478096699	0.00205910189211282
Ccdc90b	M7	turquoise	-0.0835797525209638	-0.0381273050757699	-0.0517476224600423	-0.0168061958229394	0.00568242089440079	-0.00368874641752539	0.00566676778544962	0.0127247596349918	0.00147627468463879	-0.00720254289370953	0.00951077027608015
Armc6	M6	green	0.0611528431294741	0.00711353624228082	-0.0736218837629404	-0.00572179015746373	0.0102613336848332	-0.00921167492082314	0.0393056466685413	0.0142395962688337	-0.00788639335252237	0.0230794608242376	0.0513973226413345
Zfp882	M9	blue	0.0344123642011674	-0.000214564221456039	-0.059802624114609	0.0222589209568545	-0.00406488213343309	-0.0146862218411302	0.00934016356211805	-0.015765366556595	0.0278073260033705	0.0548549711676044	0.0693676914002588
Dpagt1	M6	green	-0.0249428855674323	-0.0577528931615937	-0.0368421898158514	0.0205654300535428	0.00129645129662988	-0.000294256125325412	0.0284688709955753	0.00627258161154563	0.0343346216036999	0.0575949897133664	0.00522271754941951
Mpzl2	grey	grey	0.0373420226642363	0.00284113661675025	-0.00347101433859683	-0.0217622013276992	-0.0167465249980292	0.043262099902711	-0.00860602288654886	-0.0190465805431578	0.00799247817866551	-0.0184286036627089	-0.00966260509010725
Cgas	M10	red	0.026888125283185	0.0147169385191357	0.0130750645542975	0.00842232519431567	-0.036016527490528	-0.0208309656898091	0.0202981328310311	-0.0311051718249094	-0.0378891516064918	0.0669522852656287	-0.0318250320697481
Cep70	M10	red	0.0590052713037522	-0.0146861940671311	-0.054544987161443	0.0220050689979155	0.0689946877801759	0.00342025054267376	0.0436173897195808	-0.00336234491695721	0.0235227602131168	0.0611102931776207	0.090910773527643
Cldn18	M8	brown	-0.00835195066928332	0.00438077964761415	-0.0573598941299766	-0.0191184033992472	-0.0310925123003361	0.0309378648010565	0.0501647568316611	0.0594983043308899	0.0486642936436385	0.0464727574240434	0.00512017964138172
Tcaim	M9	blue	0.0125680943667319	0.0130097870358146	-0.00800362901290974	-0.0316224607869553	0.0428968604572353	0.0549377037663413	0.00375594129295348	-0.00802871789354055	0.0202157062046978	0.0325699728899618	0.0576377339986843
Akap12	M10	red	0.0152788799062823	-0.00179869545394108	-0.0150919142382288	0.0339725091039504	0.0199190571179309	0.0160807305144059	0.0319979269799059	0.0238766930784084	0.0320129757400703	0.0487374408369003	-0.0136438617735979
Sept10	M3	black	-0.0255821882581868	0.0167070231482106	-0.00250656640443035	-0.0179906011909575	0.00569809765259696	0.0529780140983366	0.0188626170860343	0.014090364627565	-0.00409151876486178	0.00120908321513919	-0.00503284663031048
A530017D24Rik	M10	red	1.04282767530629e-05	-0.0276596762339043	-0.0321976780293305	-0.0732139083945442	0.0123104965377236	0.0417133729366735	0.0128483719116166	0.00595528694206494	0.0314529955483982	0.0668859225467889	0.0430352198098752
Ace	M9	blue	-0.0255373360594004	0.0473800342764726	-0.0736016571589092	0.00840373622827164	0.0126952179195832	-0.0110150320624035	0.0318060747198144	0.025215557700108	0.0131631487699332	0.0357642005174242	0.0083829397870704
Ankmy2	M3	black	-0.0479383436155387	-0.0331463896090539	-0.0707384303222716	-0.0352519096883999	0.0137100912639832	0.06657325683853	0.0401903735854359	0.073997688287082	0.0613148092591895	0.030879493722102	0.0393039295759752
Clba1	grey	grey	-0.004749103113609	-0.00399312095920005	-0.00819206212068315	-0.0294488447253173	0.0416282805628166	0.0448508049068107	0.0535868833656778	-0.0141474053742565	0.0457093309645177	0.0397048885265908	0.0212721704602884
Txndc5	M8	brown	0.00640679113387712	-0.0446610741789674	0.0129076394157557	-0.0117305959835518	-0.0167465249980292	0.0526847042919623	0.0233291741589744	0.0571269154815841	0.0671746897020074	-0.00433957654043392	0.018023375100434
Enc1	M10	red	0.0242097340973743	-0.0332239638949488	-0.0485464576106541	-0.043942412058837	0.0113715849999014	0.0323743453022711	0.0193725681865932	-0.0130668917655442	-0.00941062707613541	0.0728424865683144	0.0328979826130405
Nnt	M4	pink	-0.025807857586823	-0.0471325697676274	0.00520711672038507	-0.00912293083299259	-0.0167465249980292	0.0613547131705285	0.0341391833616909	0.00235051151306339	0.0651781625401981	0.0314957363242076	0.0419522446037398
Rnase6	M2	magenta	0.0701276357744282	-0.0535072905259932	-0.0510502603195058	-0.0262726337392408	0.00983112230996039	0.0125417880848393	-0.0091171302595204	-0.00100712746679519	0.0345927560181691	-0.00465234000704145	-0.0226673358383203
Bora	M8	brown	-0.00162820005609998	0.0291468874417362	0.0141699999464299	0.0163683853881793	-0.00998324897731558	-0.0214456018363399	0.00246206278655174	0.0182263656822918	0.0638186674234891	-0.0354031839408956	-0.0485445976042865
H1f0	M7	turquoise	-0.0654007119031144	0.0143066106964177	0.000929875616236934	-0.0165035059103884	0.0339291432668395	0.0645314999172376	0.0398792245963583	0.0264682366910573	0.0125952416199749	0.0496196364941	0.046205870199134
Slc11a2	M3	black	-0.0278734158055791	-0.0379637571827044	-0.0582168014781935	-0.0502972343016735	0.0415444643606974	0.024377400346029	0.0588852868439575	-0.00472709917017844	0.0606759944078732	0.0519136671294561	0.0271450139628578
Ppm1f	M9	blue	-0.0173416004311591	-0.0189711903525033	-0.0221742266199059	-0.00762018528898016	0.0195611274093516	-0.00432877332752933	0.0162159549330945	-0.0359166080879098	0.0340310599494596	0.0531265183189283	0.0587343683823672
Ccdc50	M7	turquoise	-0.0463916889073821	0.00308575853521844	-0.00537646056593667	0.000887728314599697	0.0645821627168998	0.0709663497540301	0.0176916973013486	0.0119955226084034	0.0454526051269454	0.0323693643755529	0.0450024262234218
Gm16196	M8	brown	0.0714080806612717	0.0303805121090152	-0.0120468285212205	-0.0113733896073713	-0.00527797430628664	-0.00747432425955784	0.026314631483156	-0.0341499235926601	0.00494030147771661	0.00296539771412261	0.00826325129679558
Vars	M8	brown	-0.0353977508316735	0.0181187736758638	0.00334104301996515	-0.00311736407674176	0.035656314056161	0.0295209529858704	0.0456863957180883	-0.000120057199700529	0.0563916392907843	0.0440724474649603	-0.0113257451408248
Ticam1	M6	green	-0.0186339378532032	0.00620256952715516	-0.0515928927885893	-0.0128554271114227	0.0134877734921773	0.0900592875241452	0.0244078698764475	0.0170876537123479	0.00151444007509326	0.0364302537755257	0.0150521129208081
Msh6	grey	grey	-0.0325023622141739	-0.000439213910305054	0.00267537854889239	-0.0284844777414207	0.0149771204119714	-0.0154671650442044	-0.0162529450248796	-0.0291401364596364	0.0163577045102216	-0.000306691335417682	0.0176773175251651
Prelid2	M10	red	-0.0246426715179157	-0.000259454951217273	-0.105576065189318	-0.00801373207934971	-0.00415950286074877	0.0558542566978485	0.0597049356650019	-0.0119124207097119	0.0242661319996967	0.0391097685113585	0.0958451681754461
Gsto1	M10	red	0.0270325641523696	0.0196272233844916	-0.00248141711311198	0.0024577725228874	0.0323899069822893	0.0111752128125675	0.0387294774776357	-0.0467590088548527	0.00230496671647776	0.0837680031190343	0.03059897077969
Xpnpep1	M5	purple	-0.0548089670269784	0.0171660214021117	-0.0069110667667625	0.0118100963885265	0.0380669008985186	0.0634995039912987	-0.00108669746356941	0.0133587041975494	0.0146095321051973	0.0154034056179276	0.0110197024124818
Polr1a	M4	pink	-0.00204513254971909	-0.0563257607184508	-0.0336862016588739	0.00408145435501382	0.120058538569931	0.028714341245613	-0.0218741713776105	0.0131007482013101	0.0112680103772521	-0.0236114192068295	0.0271368657195425
Basp1	grey	grey	0.0402345255359904	0.0132054395592386	-0.0345789280981205	-0.0429646781285114	-0.0196544961819084	0.0591928858733497	0.0721122691103406	0.0839003510484698	0.0860386414734178	0.0185870179105139	0.103338149376732
Ezh2	M9	blue	-0.0147604298127127	-0.0441933885270509	-0.0544258004064802	-0.00319923826401468	0.00983674014783575	0.0264067612850739	0.0309590359535707	0.00511338513331997	0.0169325883890258	0.0463462076031299	0.0415519235681161
Ankrd13c	M8	brown	0.0140394621142317	-0.0273405391349516	0.00446160673056474	-0.0167750098855788	-0.000507619626622812	0.0234592232859755	0.0415076647911743	0.0237818236349184	0.147413348807047	0.0644593703365513	0.0403980090782973
Pecam1	M6	green	-0.0290230596266439	-0.0148349289238685	-0.0396429513409604	-0.0625199543290218	0.0268953096810541	0.0357090286621277	0.0977347781290221	0.0232504369068646	0.0557543476574202	0.0184309163178415	0.0448483146741327
Pfdn1	grey	grey	-0.0687740476146847	-0.0412061269364034	-0.0471720514381374	-0.0448370062097114	0.116861871023275	0.103664644261823	0.066937285301571	0.0380580643685094	0.0700289726609402	0.0761622387856339	0.0175213677550161
Gclc	M9	blue	0.0407377991603005	-0.0387567756608074	-0.0693858277698568	0.0361231365174514	-0.00117320271822015	0.0397445864809273	0.062564052669327	0.029559494671306	0.00216615862401072	0.0316475975591235	-0.00994899136727608
Nudt3	M4	pink	-0.0823444283846546	-0.057544821381532	-0.050758589304248	-0.0490113633885156	0.0495582406063925	0.0792990710880711	0.054015255466108	-0.00344898238653997	0.03867489116574	0.0447767415695091	0.0325206892500851
Slc43a3	M5	purple	-0.0405435661064486	0.00813929685757198	-0.00376253819467374	-0.00354546825346643	-0.0204987950133091	0.0252785992496886	0.0277856325987326	0.0110930143600775	0.00481528570113555	0.0144817264899917	0.0139668521625511
Ifi47	M2	magenta	0.0160229015076742	-0.0108952277078373	0.0203949933412506	0.00759085602646009	0.0219176219429562	0.0593708779563321	-0.039591703200367	-0.00380072135605498	-0.037000425709846	0.00400295664928206	0.000304679128499123
Ighd	M6	green	-0.0316054142170398	-0.0329873496653183	-0.00537399581428383	-0.0652525092466505	0.0598730864011973	0.0606568841857973	-0.00587769460566502	0.0158435278304054	0.0791854510524978	-0.00696578376123252	0.0249477880117847
Hist1h4i	M9	blue	-0.0228541423785068	-0.0926648233449994	-0.189621999864672	-0.0402142905585277	0.0349966621428317	0.0903638262982109	0.079742634657399	0.0921392500784614	0.0437855949642758	0.171937138204216	0.0932790211711507
Etfb	M9	blue	-0.0254880932237648	-0.055496036512534	-0.0303511798612872	0.0119355812012066	0.0660014087419168	0.0989734774869255	0.0681698985541221	-0.0513690322832188	0.0170819478637609	0.124855373625542	0.098250731969526
Aldh3b1	M7	turquoise	-0.204981594006937	-0.142627480638091	-0.116635818125382	-0.134176733415092	0.0985614510489473	0.274538050926045	0.232538111666067	0.0942686770725278	0.153726266481741	0.246299602451291	0.176943520868986
Tent5c	grey	grey	-0.0716223992727087	-0.0130623401657903	-0.00513308350519385	0.0017879801475757	0.0190140134000943	0.0560888849314347	0.0307977289266769	-0.000955502154678508	0.0253399575089136	0.0433097711599585	0.0261808933434331
Gpr27	M7	turquoise	-0.23961075367398	-0.127642463289153	-0.108443949037956	-0.103531465310452	0.089981104706639	0.191255105604418	0.198268862885432	0.0854990162472121	0.13920814610436	0.178906069234239	0.129982374691974
Pcmt1	M7	turquoise	-0.233850210275906	-0.0986376180906538	-0.115624060842214	-0.074703878411004	0.11086535115534	0.220551728486748	0.203391842197744	0.0694646118330755	0.156969270228911	0.207374798116924	0.162400262596489
Slc20a1	M9	blue	0.190897910422219	-0.0395997627179953	-0.158139209800599	0.00565217745199187	-0.0032574183319198	0.0648234332422147	0.0826112544188264	-0.00132390753268536	0.0462684551015183	0.185966186564004	0.0976317875191347
Rpl7	M9	blue	-0.228162447519164	-0.131651813088609	-0.16078456165641	-0.128354589924873	0.131282949902115	0.290354046278037	0.233180181136951	0.0859102103498543	0.174886375024302	0.330001591240746	0.200546158051657
Tnfrsf23	M1	yellow	0.0787836724292679	-0.0292352857012587	-0.0846015544389447	0.0236556148421399	0.000597200554173717	0.0303477048718053	0.0751291916199592	0.0683576206427112	0.0767465747528562	0.0335817452162727	0.0323721690925543
Cdk11b	M8	brown	-0.0945671047569847	-0.102508088397719	-0.147824174799099	-0.0848849961864109	0.0294840941464257	0.117284814545488	0.226515617663501	0.0801585723350843	0.301491576101129	0.128222177824106	0.137801124616624
Hspa1a	M1	yellow	0.0519444242829548	-0.0686421504185673	-0.0314506012593787	-0.00877130126674169	0.0327146580795983	0.044133696179481	0.0214347363579692	-0.0261630716735844	0.0945728242483461	0.0388660025208364	0.0183736329024357
Mospd1	M7	turquoise	-0.162506321046121	-0.0982612869691489	-0.0954228980766269	-0.0782133822607863	0.0467274839990728	0.143370560599811	0.153184888134881	0.0597528041812395	0.0937170771355472	0.161177929233656	0.141042781570561
Keap1	M7	turquoise	-0.0517449866261784	-0.0703085524748918	-0.048541051976968	-0.0562429674232896	-0.045176618196694	0.109656442877154	0.0293074332701759	0.0793228662840664	0.0515666437400867	0.013382899359795	0.0173320892321753
A630001G21Rik	grey	grey	-0.0649412597476427	0.00827921834083315	-0.0091502799873928	-0.023198137237802	0.0586136116146473	0.0714443505051889	0.0158313194857233	0.00290763446612167	0.0354289586641259	0.0271300334630874	0.0340955425832747
Exosc7	grey	grey	-0.0635583489588962	-0.00603826800152928	-0.00768624464364006	0.0216196477757722	-0.00520020454321753	0.0327362593369597	-0.0266859798893314	0.0107847837748481	0.0115193404118382	-0.0062800257227307	-0.0239076000211481
Hcfc1	M7	turquoise	-0.0992633967311405	-0.0394146840368693	-0.0523230117170563	-0.0545457918258093	0.00406439436866434	0.0684923743214004	0.0512989767141997	0.0389307164346847	0.0590820296992206	0.0521867726074428	0.0539171875137522
Rpl14	M9	blue	0.0395427652342572	-0.057375266805357	-0.0631723688489501	-0.0616391307243658	0.0772767142339606	0.12959164157158	0.101447220238501	-0.0331805661509138	0.103799518545881	0.193984037402077	0.119027383107986
Ccne1	M7	turquoise	-0.0563362618295119	-0.0151524846092973	-0.0125896219100988	0.0186121922565197	-0.0209323932121826	0.0031498526386492	-0.0127789984327495	0.0233925613976272	0.000931204955019154	-0.00958876917108582	0.0101904597759573
Slfn9	M4	pink	-0.0424791553319494	0.00691409417864926	0.00335187039474986	-0.00923547450014012	0.00658238429377346	0.00568730040349745	-0.0272511999224209	-0.0182374983369052	-0.0231031700469549	0.00600753571760424	-0.0112853885608275
Ppp1r42	M7	turquoise	-0.172219460497994	-0.0350209057460356	-0.0464215646453394	-0.043676481008961	0.0823542822373544	0.165188247237176	0.140722445962052	0.037413709186451	0.108882930795072	0.150218634562499	0.108042730746298
Pdia6	grey	grey	-0.0280817592523702	-0.0489782754776803	-0.0544408264970893	-0.0158471737777563	0.0375224944992883	0.101240286606969	0.0362777528678187	0.0217163129314983	0.0559837558274757	0.0560093488185856	0.0389691302369462
F5	M8	brown	-0.0890069466323018	-0.0533550606615956	-0.0470111402019603	-0.0441981645288836	0.0454182808748307	0.140179081063979	0.096285441102949	0.0566596860959497	0.183439767535863	0.0890296066413738	0.0874864457046383
Milr1	M7	turquoise	-0.211734662962309	-0.130085545612629	-0.0807661877319094	-0.0809345635697306	0.0731122542208628	0.249816757068664	0.142643478760676	0.0856446657728206	0.121264871145547	0.116959823102135	0.132507107966179
Cables2	grey	grey	-0.102791959151834	-0.0715580966151697	-0.0171282063675231	-0.0566264658429835	0.0478113082035448	0.118542161835216	0.0918729701597405	0.007476702072392	0.0684266263844568	0.0703480363979787	0.0828773728013008
Col6a3	M1	yellow	0.0837128083115258	-0.00317345644362014	-0.00840962210877221	-0.00292115119142088	0.0205061514821535	0.0568728183157688	0.0177265223696529	0.0262824570910272	0.00612574483778152	0.0304785451377951	-0.037190214120938
2900060B14Rik	M1	yellow	0.0708136878134113	0.0186014738915823	-0.0501682399949236	-0.0137959870676816	0.007037105871432	0.0450927769715136	0.0166698947971255	0.0454783086493318	0.00839294304595244	0.0496995845289846	0.0381252496962615
Heatr6	M7	turquoise	-0.146932849128946	-0.0206152846254919	-0.0306271491327294	-0.0156166008731271	0.0124654437272284	0.107372149274963	0.0515519234473079	0.0521431087262299	0.0398199063426416	0.0309987231718202	0.0191633067166662
Zbtb20	grey	grey	0.0334237465023807	-0.048179543768184	-0.000744871517174359	-0.049758622621824	-0.0214436301940459	0.0549008948240502	0.0722968260395504	0.0419803112054517	0.00073094110343189	0.0322131592478919	0.0482315388223837
Sh3bp5	M7	turquoise	-0.197862496734718	-0.137974320829031	-0.122564026194106	-0.105199806933178	0.107042373443228	0.246157597111301	0.185402253079	0.110065216396198	0.207843085356993	0.162458811779992	0.139856145709314
Cnp	grey	grey	-0.00529409354560311	-0.0600780057797485	-0.00609055225022888	-0.0574668502629746	-0.0142942900982749	0.0521217368995851	-0.00193950213633122	0.0721502287012365	0.0533569905856095	-0.008247718598557	-0.00976224013248876
AI839979	grey	grey	-0.0748931557054759	-0.014424354840363	-0.0707436749723203	-0.0414513370676104	0.0472540046441003	0.0538407605585665	0.107594425327763	0.0394304069221889	0.0371831828762843	0.110755333499788	0.0684185267347692
Ndufa1	M9	blue	-0.199484393673337	-0.109536523442496	-0.0960557008086798	-0.0840652000749507	0.123166224492763	0.250756591648633	0.244717146617341	0.0100883670405276	0.188084443141804	0.282742671009369	0.19041441753582
Med31	M8	brown	-0.0364218498917126	-0.0708036458810184	-0.0352865212520972	-0.0438862432409455	0.0332908448622264	0.0651668155041375	0.0358609942744283	0.0274232725568319	0.148698763748031	0.0493493087268989	0.0570516866316221
Tle5	grey	grey	-0.218864836169291	-0.16489062917774	-0.190446765490795	-0.110283889235183	0.0569237135071394	0.223190771391812	0.249025607351961	0.110014372541847	0.170850224706423	0.218805009650354	0.150238936842859
Smc6	M9	blue	-0.0485439521660488	-0.00868113321237326	-0.0528306168495746	-0.0253037427791098	0.0175327120983949	0.0872949608287853	0.0497564661044628	0.0180940821272609	0.0259075376854954	0.0959251236593645	0.0860363988639456
Ccdc125	M7	turquoise	-0.194105339527106	-0.117251012364617	-0.105841969294425	-0.0695328276455993	0.0815311747340146	0.151765918303745	0.177883156490622	0.0905015893677135	0.161862634022344	0.142463413083529	0.105207873271911
Malt1	M1	yellow	0.250695591442001	-0.0440163087979839	-0.0816398164392517	-0.0547048933059371	0.0335801445254847	0.0640385249596944	0.10582159353265	0.0366435881960715	0.0402247997807978	0.142178548582345	0.0763539955843219
Rpl4	M6	green	-0.197606154886226	-0.0870399732597483	-0.0950654562850966	-0.0948897640644775	0.120910076198512	0.249051651638264	0.206496582904593	0.0564650771935871	0.142396451227507	0.201021281009375	0.165844398296981
Arf2	M9	blue	0.14626726403716	-0.00456377112985049	-0.0936895334742789	0.00950861597402275	0.00317487745922386	0.0129537765831481	0.0816806365478276	-0.0526091088434539	-0.00290715555982406	0.154413412077617	0.135053933506856
Pnn	grey	grey	-0.0780612338460563	-0.058835909730875	-0.0930991356111937	-0.0611077719789408	0.0419557075407156	0.10130547845367	0.0861071359628046	0.0314018029384556	0.0922067211195528	0.0725481839344398	0.0637697527651936
Ccdc88b	grey	grey	-0.074217718806905	-0.105719106190465	-0.121800176829253	-0.0732409543044411	0.050667127033364	0.166797221660768	0.168067257065024	0.0486309438538778	0.0972573185539684	0.132682824444478	0.144379775001788
Cnn2	M7	turquoise	-0.330228392690415	-0.177152681825309	-0.196203012639029	-0.168870290463188	0.114954305539356	0.333153248981295	0.257133112687743	0.224092565800767	0.239276264824885	0.214040975508174	0.199257409932654
Eif4e3	M7	turquoise	-0.178935590898083	-0.105507312239411	-0.0877771845398881	-0.0929178596278115	0.1021680548174	0.230984598510023	0.176947109864775	0.074804740009617	0.146331849587125	0.200379649179783	0.149609766597904
1810037I17Rik	M9	blue	-0.154694783713356	-0.0839078310915172	-0.156079678206119	-0.0965861879769296	0.0565582522292166	0.203869611140591	0.209979533104781	0.0991546975528908	0.120620601943017	0.247331234472821	0.125186145786353
4930523C07Rik	M6	green	-0.0924406234090131	-0.0987456843988324	-0.0881307657309609	-0.10506177004943	0.0960289838637164	0.159773694148605	0.151332803311616	0.0701651283867569	0.124611871875931	0.126041726873952	0.113221492532523
Cd63	M8	brown	-0.116726791114428	-0.0802574747914946	-0.0771712162102973	-0.0632289163168244	0.0566893143578721	0.151094928157282	0.135020236714371	0.046146742715861	0.176319299001733	0.162873573127268	0.091546843030109
Heatr5a	M10	red	0.0114931812079277	-0.047889346172569	0.0061226102059982	-0.00132986078200206	0.0168160163708002	0.0291918387769582	0.0818891993251685	-0.0240573162630225	0.018082802527531	0.0886259122362898	0.105354023658521
Cbx1	M9	blue	-0.0303164010771839	-0.0191058550438982	-0.0547370526778122	0.00656652109663361	-0.0321354047780055	0.0473717767240027	0.0239703905587383	0.00828566743451166	-0.000657064204838445	0.0542016073589107	0.00677255354910659
Tsn	M10	red	-0.045317698889634	-0.0201129769860778	-0.083194900867205	-0.00542115541623894	0.0773979164849342	0.0844544990805585	0.0481808143335043	0.047559011006306	0.0222875667980103	0.0970512837637887	0.125683163244392
Nfe2	M7	turquoise	-0.219950330341737	-0.144395339826549	-0.0974781086338315	-0.114278318288215	0.0743191141347297	0.238178076524064	0.179887444826099	0.0582606876081918	0.143500464846024	0.177092679379246	0.154630127474697
Cstf3	grey	grey	-0.0252555764927709	0.0213775202888599	-0.0466836412062918	-0.0549316750691523	0.0110157944306012	0.0439313474795928	0.054085339679983	0.0459604297031219	0.0697586997248977	0.0721338170549279	0.0656373672286845
Fubp1	M6	green	0.0121135495826368	-0.0227381573896045	-0.0278877532330357	-0.0394059512997092	0.0610846447155346	0.0663046448360561	0.078316038335044	0.0219128713272396	0.0786363662040381	0.0555588028602715	0.0326332063840908
Sumo3	M10	red	-0.0361624488402282	-0.0140971505727586	-0.0607686597033634	-0.0118646536856366	-0.00751170873607274	0.0427663112178163	0.0375325108882477	0.0371195003321193	0.0245493143839853	0.076167332414361	0.0827314328300805
Rp9	grey	grey	-0.022561862434032	-0.0315231075672216	-0.0836199623747864	-0.0341677579180648	0.0527558068881035	0.127671190334546	0.0380590869057769	0.0308061940278688	0.0825397014526775	0.0891182762985739	0.0328640811678991
Mcm7	M4	pink	-0.0414321172293521	0.0141103170973132	-0.00666001040005052	0.0108858730986219	-0.00875045005765478	-0.00790803788170729	-0.00756287341168086	-0.0072684912703194	0.00670774234425502	-0.00479445417136791	0.0056775725950431
Cox7c	M4	pink	-0.206027415745981	-0.134095182616965	-0.121888183216066	-0.128607167829618	0.277759458440559	0.228010012601512	0.190657603807972	0.0913743502347172	0.106774175211414	0.186105293562682	0.136325255172096
Hinfp	M3	black	-0.00828861385292146	-0.0405589450576986	-0.0479582495803378	-0.099549570928821	0.0407324763721308	0.0604561135679568	0.0445978558819495	0.052439525799773	0.0654455484360799	0.0345039054108849	0.0300281245556694
Socs3	M5	purple	0.0253406247081786	-0.0731268015713919	-0.145117001145873	-0.076360378809062	-0.0141328173841252	0.291713041083205	0.0742299361921872	0.152002459012982	-0.0358137973971078	0.111464405093003	0.0692596768563237
Srxn1	M8	brown	0.0168603460623435	0.0470641719930358	0.0294537229293304	-0.011268705576052	-0.029948223506642	-0.0667004348599287	0.00331344517239739	0.017078102730585	0.112691362122656	-0.0549906061825674	0.00228395724042641
Fam20c	grey	grey	-0.14984236624464	-0.0795500282222072	-0.063419890663325	-0.0794410873137518	0.10683989393773	0.166554657459205	0.10305607291688	0.0107337951627586	0.118967475242466	0.135401443069882	0.133993223168135
Wdr3	M10	red	0.00385148028803823	-0.0296720317253896	-0.0277114432405054	-0.00551695482838332	0.0289583843499365	0.0238723373361023	0.00441127930178287	0.00434571753683737	0.030582141088649	0.0381943771209362	0.0650849226434169
4931406C07Rik	M10	red	-0.0429586164429939	-0.0493738206697685	-0.00498841222846002	-0.0260353194662123	0.0529213567949663	0.0546511210486402	0.0565491155594629	-0.00887395830593956	0.0662210815535088	0.0651006096896723	0.0835075147993305
Grpel2	M7	turquoise	-0.0428873669212861	-0.0116960810383848	-0.0428562417639472	-0.0286222757016621	-0.00831960146246676	-0.0370128031756571	0.0124572385182873	0.0575705644187669	0.0649760869344889	-0.0199867534298941	0.0336886647249549
Taf3	M5	purple	-0.0187051331098503	-0.0476657497212787	-0.0318923865054349	-0.0293315755507649	0.0334548419193726	0.0569888572591433	0.00530715943188315	0.0272702697735288	-0.0091412461075218	0.0185647592595173	0.0194623056729409
Dcaf17	M5	purple	-0.0565556279635516	-0.0178304371808991	-0.00632581089876185	0.0108404069578725	-0.011880126162137	0.0704278909266126	0.0406066860120698	0.0206833690298247	-0.00786695947974315	0.0435880964302271	0.0473949542318653
Dennd5b	M8	brown	0.0170008947147828	0.0115908348762163	-0.00969593843053592	0.0129177111945462	0.0489528440471409	0.0182962562628346	-0.0232126435808295	-0.027569945531301	0.0698395615281051	-0.0118252536640686	0.0524035993021875
Rrm1	M8	brown	-0.021365074255522	0.00505113772564851	-0.0267398333658081	-0.0221460161850737	-0.0248969230767649	-0.0139084166286612	-0.0219072116431773	0.0195655710270196	0.0352471542090491	0.0080882040857127	-0.00614491830630545
Taf4b	M10	red	0.0317033231885878	-0.0240258017709373	-0.0669001692542868	-0.0707851907016133	-0.00637796162286194	-0.0213174765102344	0.0731616723126999	-0.00519388615862398	0.0163754599143846	0.0542455020882077	0.0630294982388046
Gm35554	M2	magenta	0.0249467767575079	-0.0599089811192799	0.0106131328679051	0.0654201561127082	-0.023713603870656	-0.0368866101997474	0.0209142906696879	-0.0471106595365493	0.0241733251389211	0.0176425866207359	-0.0514435057439747
Ifit1	M2	magenta	0.0277039281492819	-0.0654563095855397	-0.0618319760737935	-0.0363260890911464	0.0451785574895236	0.0829345677294732	0.0911332432055368	-0.0140540263673821	0.0181326900968782	0.0222444598242901	0.0649037328845609
Hsdl2	M1	yellow	0.0171021130111515	-0.00360261994919744	-0.0488297016975772	0.0290567840776365	0.0196888591033176	-0.00360849242200976	0.00735829833487068	-0.00648092261005134	0.0664497834444859	0.0687011169816867	0.0787303477361149
Trp53	grey	grey	-0.0470301973793819	-0.0195466213127795	-0.0455608464137654	-0.0191344311880808	0.0372471143239645	0.0633637609239469	0.0636949678882011	0.0253411425494928	0.0473638924909045	0.0507271137516475	0.0462307578488885
Hist4h4	M8	brown	0.00234148509489089	-0.00154985292054982	0.0204789927243646	-0.0374724800757901	0.0224361135752379	0.022173665408573	-0.0261370242718293	-0.025926812657396	0.05675777675861	-0.0200576270453319	-0.0348542065575169
Cdc25a	M2	magenta	0.0081692027417563	-0.0948085729399206	-0.0182157806917304	0.0168897968881022	-0.00351285157959051	0.0472291135956234	0.0300189961535357	-0.0369816881641614	0.0114267298094137	0.0543655494007509	-0.012008713315103
Slfn5	M4	pink	0.0430914489395953	0.0163024061536944	-0.0419731158987597	-0.0377883803929923	0.0755713302862956	0.031433315493872	-0.0188520004103407	0.0377209164828396	-0.0130437412548291	0.0574507997031941	0.0163285919368717
Rtp4	M5	purple	-0.0470263213123948	-0.0520419735101036	-0.0673307704914693	-0.0435603732261694	-0.00118864544371098	0.182414663418335	0.0390393212319376	0.138812048859742	0.0285886269902743	0.0109979540438446	-0.0274957050893739
Bod1l	M7	turquoise	-0.148690120660684	-0.0761624546852747	-0.0876909249570542	-0.0855845032964306	0.056996498262034	0.190255123749157	0.165053495975473	0.0514470939161024	0.136112637340113	0.165873722946309	0.113184043307048
Odc1	grey	grey	-0.0104510785394323	-0.0566241816204804	-0.0320315805926017	-0.0228279801516291	0.0254018027287781	0.0969336413123896	0.0653533704609957	0.0310634911869836	0.0560121370190593	0.0412172477956732	0.0464923865137039
E230001N04Rik	M8	brown	0.0338273704723271	0.0379904377850813	0.0163590579845502	0.00355771651010077	0.0106086877291772	0.00290176530210726	-0.0141627528416774	-0.0296520358549279	0.0694534147445101	0.0175770516933044	-0.0452225811016369
Mospd2	M8	brown	-0.099886933613899	-0.0248727855268187	-0.025543333228822	-0.0252309953013003	0.0603063172912038	0.122600288956437	0.0640184177060195	0.0223673466782618	0.104586822932769	0.0632625635796324	0.0614965399678127
H2afz	M9	blue	-0.081460149411664	-0.140595033925483	-0.246815190608652	-0.198011244469375	0.0576238842751795	0.238133739656639	0.219990549725206	0.206711524913646	0.191144756069119	0.289556176958531	0.20230987051252
Mpeg1	M1	yellow	0.225113541863301	-0.0470383967413155	-0.0800333146878645	-0.0558132429117065	-0.0235388783297003	-0.0236039546673572	0.0287457407674584	-0.0235234390273439	0.0322919598301975	0.0153801039069785	0.0876898230045208
Tpm3	M7	turquoise	-0.131305654812854	-0.1427937439901	-0.33560643761105	-0.209739877104425	0.0788168187329749	0.284476999510698	0.190592265662778	0.345641463867358	0.204670489036161	0.206857414979808	0.217945804477457
Capns1	M7	turquoise	-0.24223594977643	-0.100823680490387	-0.133855039693265	-0.145631210683659	0.102890942799231	0.263610684310082	0.200617280731558	0.136419932121464	0.223016748857291	0.189026676537598	0.200130204186384
Cops3	grey	grey	-0.126494000063753	-0.0143331455206991	-0.0871216995234665	-0.0426127918325554	0.0675284481757781	0.109630298441437	0.0662249447883343	0.028272511232679	0.056841745014711	0.0958062271030055	0.0597261904369449
Gadd45a	grey	grey	-0.0546157487808685	-0.139903031905469	-0.185610116238238	-0.128619599886299	0.107745991259492	0.247055899534045	0.135766913830603	0.273133054189547	0.186451660820123	0.111468723801072	0.122211922633834
Nod1	M1	yellow	-0.0161535631685986	-0.0305912490396363	-0.0207758643090038	-0.0813638950777252	0.0934641151702506	0.134827850828315	0.0256866162777287	-0.0473837122264734	0.0160023704582272	0.0760991308296612	0.0852070375615423
Smim7	M7	turquoise	-0.102707398131338	-0.0698526004726871	-0.0721273307800465	-0.0436163589048998	0.101003504648918	0.117725898974961	0.13809620807925	0.0344917897547628	0.0982349985343739	0.109891359116375	0.0997781592674194
Yeats4	M10	red	-0.0925894987905265	-0.0393423154411591	-0.081719486263079	-0.0363890704462938	0.0593648243416572	0.11859058494229	0.10062916820955	0.0363040512784924	0.0735757253718249	0.132727782771701	0.11515995476279
A030005L19Rik	M3	black	-0.016274459793802	0.00640046189939421	-0.0476371385468069	0.03869069019215	0.0314428864252628	0.024204195135573	0.0460744132726896	0.0641455392026144	0.00766513439021718	0.0287996138754762	6.67683770287656e-05
Csrp1	M9	blue	-0.0685826894849533	0.0205436163136397	-0.0169935625561488	0.0231046829110246	-0.013752941378807	-0.0228643127937127	0.0118728712464057	-0.0117020652171273	-0.0189155348598159	0.00362455962230187	-0.00272178278259386
Itln1	M2	magenta	0.00941051377027982	-0.0182215625401033	0.0218405135630535	0.0358750896495325	-0.013752941378807	-0.0268878353592492	-0.00803050833388005	-0.0221104553010917	-0.00332305728496978	0.0237811363859451	-0.0334703229865264
Gm13261	M8	brown	0.0209013794167969	0.0277529997574801	0.0443993693299089	0.00993608609965891	-0.0295087616235172	-0.0463541613652061	0.0132110397372136	-0.0241372903315248	0.0485597993316705	-0.0413121288932454	-0.000376574068250914
Actl6a	grey	grey	-0.0155255547198661	-0.0340861844729144	-0.000341690186999122	-0.0271570630599553	-0.013752941378807	0.049882163643639	-0.004908619404675	0.0564112072576502	0.0530156259323656	-0.005817311655866	-0.00601166457822208
Ppm1l	M8	brown	0.0181167656761274	-0.0670469735305291	-0.0236517064741946	-0.00160812352563111	-0.013752941378807	0.0165483536342501	0.0253127625445551	0.00685810765175819	0.0429503632276572	-0.0151106316098541	0.00245413110831019
Tsacc	M9	blue	-0.0395396484363352	0.0138006813139942	-0.0306315689414651	0.0151146108970858	0.0501734119335657	0.0260526375874202	0.0671778285103684	-0.0180043979189134	0.0011400327300414	0.054477814735522	0.0299035868093878
Gpr61	grey	grey	-0.0269544731169137	-0.0424744287616615	0.000646848207873023	0.0248825659842043	-0.0786088890320382	0.0681715109775501	0.0338275574008205	-0.00438569117234973	0.0236374276589718	0.0560378813171063	0.051358147669639
Fancg	M7	turquoise	-0.0424109790092247	-0.0404140477315224	-0.0140782208603874	-0.0386488710955838	-0.013752941378807	0.0447122674635292	-0.0130683241874707	0.052973596232714	0.0279654537981747	-0.015516454718005	-0.00107182541233254
E130308A19Rik	M10	red	-0.0161889199279544	0.000519206361811834	-0.0183089748914181	0.0157700481814307	0.0203492194085456	0.0308017585828861	0.0610116182160538	-0.00509544565089077	0.0191725030087985	0.0668414857233593	0.0702923392048843
Mast2	grey	grey	-0.0439555391025035	0.00944988797608617	0.0142936286170579	-0.0188809770556853	0.0193532729802195	0.0556833964815846	-0.00341515104501406	-0.00871586464852314	-0.000956997226784904	0.0116373458870178	-0.00931753230776994
Ctps	M6	green	-0.0511754812448771	-0.00163661266761357	-0.010016336365196	-0.00965094506940475	0.0183649536005489	-0.00198505397537399	-0.004908619404675	-0.0102973408527695	0.019290150283751	-0.005817311655866	0.01161768304111
Cdca8	M7	turquoise	-0.0510942720142743	0.0277043938701501	-0.0327500255241715	-0.0135164179930209	0.00968859090784822	0.0241840528792131	-0.00813238996906942	0.0830954578908269	0.0520123204718423	0.0460408797395354	-0.00297499209100616
Tmco4	M2	magenta	0.0128652823981199	-0.00916895986369469	-0.0484794497583622	0.0490594235361775	0.04113939016616	0.00901659575717803	0.0383028874591991	0.0317845850649273	0.0135441290913616	0.0205159788440394	0.00417575227741284
A430005L14Rik	M3	black	-0.0476861355881619	0.0205436163136398	0.00727403826868996	-0.019829692974479	-0.00588209847715796	0.00353826101853386	-0.00985402498912517	-0.00401166048692597	0.00195585493581288	-0.00848536508777772	-0.0215059062696473
Armc10	M8	brown	0.0178381475829022	0.00473398008579432	-0.00256275286611851	-0.0218672881960891	-0.013752941378807	-0.0186429889250546	-0.0494384098035471	-0.0111786264159129	-0.0203980260102784	0.00423007264643162	-0.00049995069948599
5730480H06Rik	M7	turquoise	-0.0262319208214871	-0.0677189837224357	-0.0380186401455882	-0.0341066839898636	-0.0153602906288772	0.0325168428369244	-0.00357902920822205	0.0663338189722583	0.00125177087859917	-0.00858850410507765	-0.0104583138015326
Castor2	M3	black	-0.0512840195498281	-0.0675656916546238	-0.00201896741414834	-0.0496131549383671	-0.108806062706705	0.0360402418802129	0.0352576965361886	0.0100539412935046	0.0479347605335358	0.0421636328924106	-0.00057874828458188
Plekha8	M7	turquoise	-0.026279049915493	-0.0184490425447719	-0.0294661290957277	-0.00679028099182307	0.0557182761452572	0.0570107905368937	0.0379942573572789	0.0270022480481026	0.0200748198707355	0.0429564211111956	0.000380389436079935
Ptcd3	M6	green	0.00151176920700016	-0.0313131142019191	-0.0442397162233485	-0.027786494940146	-0.0440138112010149	0.0140653995884891	0.0421927492238203	0.0415150269845078	0.0523380840713148	0.0138662100417593	0.0143481879199214
Cecr2	grey	grey	0.0197923412758115	-0.0274039328445042	-0.00958684094597379	-0.0167238730235567	-0.0020367667679323	0.036473859945279	0.00389997703422474	0.0532313761785919	0.0405952414226906	0.00679333274815798	-0.0173360121693435
Tuba8	M10	red	-0.0229258758578821	-0.00542445224734839	-0.000651007402758265	-0.0186760768098485	0.0022371211500019	-0.0163850022526068	-0.00323796668523056	-0.00249803189064557	-0.00701467285277017	0.0213054428188754	-0.00601166457822208
G630030J09Rik	M10	red	0.0762666143098889	-0.0170985336024899	-0.0366878035201413	-0.000296688943225107	-0.0278978610547952	0.0635619920823055	0.011768755340997	-0.00471943082797776	0.0146433626945081	0.0735088556147835	0.0236217776207295
Gm44851	grey	grey	0.049638178782935	0.0123079683841181	-0.00625463601914063	-0.00715912125917197	0.038567580024405	-0.0198135848743167	0.0186149827098547	-0.024786521454553	0.0201835219363623	0.0135247061196629	0.0457745953365199
C230038L03Rik	M4	pink	0.0221018412598223	0.00946366945064772	0.0275820749006781	0.0421404724639039	-0.013752941378807	-0.00705592142697607	-0.000165481188519435	-0.0452011690695308	-0.0403906798449521	0.0144090570455234	-0.0161032770768722
Tma16	M3	black	-0.0103657744276342	-0.0599143115984552	-0.0165946232349421	-0.01909618937096	0.0720988845652224	0.0227496629489023	0.0498267204603568	-0.0107032630701346	0.0435666516232534	0.0457334113014589	0.0444964378456593
Ces1d	M3	black	-0.0401717302467254	-0.0210183549281666	0.000543303339251868	-0.0199620590071645	0.0490153305068715	0.0573595608474957	0.00189485239006208	-0.00400659978861569	-0.0163341424592609	0.015869274391084	-0.0116691261249854
Gins3	M8	brown	-0.0310683760549506	-0.018604723117421	0.0175146261023206	0.0131680521264088	-0.013752941378807	-0.017013339376656	-0.0229136592666285	0.00584962370210979	0.0235848742601568	-0.0223235612666656	-0.021342879990778
Gm16096	M6	green	-0.00747794566137238	-0.000310242304612532	-0.00122224691940213	0.0105691651792117	0.0400747907867493	0.0470532236840089	0.0185698590974062	-0.000863827214906528	-0.00174709063571671	0.0522635015545939	0.0256269643427725
Bbs4	M9	blue	-0.0121503437887486	0.0194323543139532	0.0131482435374716	-0.0113953106214627	0.064374734921709	-0.0147741863002432	-0.0273914489894885	-0.0254346288418327	-0.0153334516493668	0.0428037293465716	0.0029289104676668
Gm2415	M5	purple	-0.0105060818377187	0.0228362442989252	-0.0522090410651822	0.0142957213256869	-0.0216772005143763	0.0720666572260927	-0.00274824971504641	0.016016829187905	-0.00575186440985929	0.0142985279965457	0.0363136453337334
Vpreb3	grey	grey	-0.0145984150068021	-0.0391360642448664	-0.000341690186999122	-0.0650473376581951	0.0445684211439472	0.0720692549415854	-0.004908619404675	0.0344145341880566	0.08042137570436	-0.005817311655866	0.0164942600130945
Lsm11	M4	pink	-0.0119766654597397	0.0099070286183509	0.0115005462334274	0.0210843161614527	-0.013752941378807	0.00505983372563198	0.0398805678146108	-0.0180407045690685	-0.0281693044161382	-0.000316940367717298	-0.00573322170551017
2010001A14Rik	M7	turquoise	0.0195732466928608	0.0250459722424282	0.0461656877853157	-0.0326458320287246	-0.013752941378807	0.0285767427557366	0.0463809755858851	0.0102779292586274	-0.00590504551435	0.00589025386179266	0.0183637255365585
Pmp22	M7	turquoise	0.0161002810467261	0.00936678620876545	-0.0631696035724167	-0.0136810781650368	0.0507238085910693	0.00458931313398092	-0.00747396995617374	0.0576295079947103	0.0671064678348753	0.0140459746757691	-0.0319950476385823
Fbxo47	M5	purple	-0.020151568723449	0.0355055773520064	-0.00737940798662745	0.0334616911353895	-0.013752941378807	-0.0143524954153685	0.0334698905516564	0.0475359482896902	0.035339896543125	-0.0165915064845619	-0.00388038631415175
2900041M22Rik	grey	grey	-0.0250286025856793	-0.0461567022799671	-0.000341690186999122	-0.0629316509648071	0.0501668094528469	0.0785177483737805	0.0520258611812179	0.0265645090843866	0.0806266560862645	0.0460098742274344	0.0229738214384171
Gm7008	M4	pink	0.0532685019789342	0.0145468791170454	0.0310736561373312	0.029641883595858	0.0504578557597622	-0.00817942363373128	-0.0447512255262708	-0.0310250096724415	0.0168301326860486	0.0220858439719186	-0.0150211329755249
Tasor2	M9	blue	0.0550062374509477	0.0113718671077552	-0.00932448023426509	0.0490084663662528	0.0511469222459059	-0.0106712511522236	0.00799259508835149	-0.0309106264231305	-0.00240915732619369	0.0645991246176358	0.0203600890567836
Hist1h2bf	M5	purple	-0.0408476793979556	-0.0187681613234708	-0.0165807942771985	-0.0194214015111964	0.0657761949751269	0.0316690469652101	0.0559025744724896	0.0143499459560045	-0.0102213116347228	0.0737750362960601	-0.00479702860651653
Nol8	M6	green	-0.0230520833778428	-0.0207619871029948	-0.0303980199342346	-0.0169984751349456	0.00966844750080421	0.00197352290380694	0.0189669830158642	0.022543393504593	0.0224512370754278	0.021688358617567	0.0203154581453119
Zfp458	grey	grey	0.0399454854198223	0.00787306170734159	-0.0205480023797247	0.0201761016303201	-0.013752941378807	0.0148834151781704	-0.0137045991980751	0.0288744743807836	-0.0182836088046681	0.0312247023760199	-0.0174704449641085
Dhfr	M4	pink	-0.0268604093157291	-0.0147338289717434	-0.0103985596758085	0.0120627078484167	0.0121349441748361	-0.0033066493054855	-0.0163763306220862	-0.013782942726856	-0.0190944292812799	-0.00753358452325503	-0.00721567460189236
Fzd3	M2	magenta	-0.000397666552614886	-0.0255492437387784	0.0170408652523231	-0.017613423102961	0.0124073193227991	-0.0477891103902473	-0.00618217091815255	-0.0370416810434284	0.00484250330242718	0.00889351592805763	-0.00875223279753888
Spag1	M4	pink	-0.042817448690754	-0.0539403439547183	-0.0168861850825845	-0.0469925637472291	-0.0380275053922554	0.0298920758811515	0.0385479779196972	-0.0180271129579897	0.0458281069600737	0.0591157240765945	0.0355154552748496
Gm26621	M5	purple	-0.035533491376962	-0.0652146716225855	-0.0252711514739099	-0.0153618553394101	0.0158203579396066	0.0408899163036915	0.0217334436035881	0.0188290578262854	-7.88412337480214e-05	0.0448881128752103	0.0375393878953535
Ccdc134	grey	grey	-0.0151333452211684	-0.0495004766509596	-0.000341690186999122	-0.0271570630599553	-0.013752941378807	0.0630389293848184	-0.004908619404675	0.0564112072576502	0.0532166565653003	0.000230022874331956	-0.00601166457822208
Ypel1	grey	grey	0.0133074995517693	-0.0300677832251787	-0.00667465682584947	-0.0195159566066131	-0.00700945450972264	-0.0233577151785713	-0.0293804131801936	-0.0127215759766735	-0.0280467910728714	-0.0207134908613514	0.0454833195566328
Gm50071	M7	turquoise	-0.0131046895751627	-0.0401273108228144	-0.0635696666919486	-0.0482191283062046	-0.0461809152054226	0.0735991976029285	0.0367229968339592	0.0593915047881809	0.0378501424109917	0.0565362047102912	0.0425105983013261
Adgrf5	M9	blue	-0.0497520600362682	0.0446574212463245	-0.027864581948957	0.0327275985428506	-0.013752941378807	-0.0460251821880031	0.0317099513854414	-0.00989114983043088	-0.0129676759201264	0.00739975408734087	0.0193690092214475
Foxp4	M7	turquoise	-0.0105145275423763	-0.0316592217064403	-0.00378896327903389	-0.0184988496568102	-0.0318792893378114	0.0107241480200939	0.0248132865449382	0.0674697112487072	0.0124764363380812	0.0227971993783749	-0.0070327906670298
Vldlr	M4	pink	-0.00788830704636397	0.00523099632011107	-0.00819462184627525	-0.0328559623296947	-0.0212523877134054	0.0034640215368296	-0.0476000861408696	-0.0159289923088155	0.000785619991407769	-0.0405813518735965	-0.000534288912953383
Maged1	M10	red	0.0729346734005553	0.0423263347338734	-0.0530512020315496	0.017919928310312	-0.013752941378807	-0.011353330805343	0.0158852467481371	0.00858509203100093	0.0568126738280083	0.0695040496062382	0.0327872406765781
Timm8a1	M6	green	-0.00261523333844528	-0.00802772235110239	-0.0347105430653341	-0.0199503763943912	0.0504828485799047	0.00618964457359154	-0.00459953284464736	-0.0178185556487733	0.0508714153420431	0.000868090253643416	0.058140679287396
Tmem165	grey	grey	-0.16734108143676	-0.0373055255442194	-0.107567855730817	-0.0368933713078101	0.0704387709506051	0.166543885145199	0.11247819944567	0.0502202501031219	0.0506777843510509	0.133277985313166	0.118587123654677
Otulin	grey	grey	-0.042279827322189	-0.0748586710333575	-0.0694806240773114	-0.0306660756382702	-0.0146841303658654	0.0293235780333601	0.0266127825613681	0.0680673331055098	0.0590286179573691	0.0838456937018349	0.0080273030896311
Pgd	M7	turquoise	-0.212013558247551	-0.146015072207636	-0.333390879200047	-0.24775699116074	0.0212032727389067	0.279419870058975	0.216281482262724	0.337457841304772	0.245485301879219	0.165036339673007	0.16993458322938
Rab3d	M7	turquoise	-0.247783213272033	-0.136343717846954	-0.0817721422722822	-0.0731472910429511	0.150875201531675	0.24112478698475	0.189236582008548	0.0683283159011386	0.16006078621553	0.183052570088299	0.144963744287461
Clec5a	M10	red	-0.087376880724307	-0.136286893127956	-0.132552577234778	-0.0886711850885524	0.10616064669004	0.191426047673598	0.144948938857377	0.0445804839274803	0.129881596138985	0.196679055201609	0.259849376211032
Tlcd2	M1	yellow	0.126103538057463	-0.0193871799289097	-0.0129103663520305	-0.0046337533729265	-0.00171767935758166	-0.0306648079922709	0.00374049091702117	-0.0221943904464248	0.0601715304773683	0.0336062014264483	0.0273802035666406
Ano10	M3	black	-0.183855651372509	-0.10367323289943	-0.0519240964570925	-0.0558103343508244	0.0661546618942696	0.196869265883035	0.145060411387351	0.0238332088916267	0.123662918270556	0.161653977326309	0.10527068584733
Arrb2	grey	grey	-0.186873250404699	-0.118612410925935	-0.156672426720005	-0.112538668696197	0.104171200504507	0.260959596985896	0.205196805291748	0.0906198898249235	0.151282414650271	0.207265654484981	0.130779177692668
Tfdp1	M7	turquoise	-0.240489448775967	-0.0704652438196868	-0.0910614417637047	-0.055537801037359	0.0909148569504965	0.203610238400046	0.13324467563674	0.117672136388891	0.103863156109932	0.1106101549028	0.0783014959839633
Cct2	M9	blue	-0.0804253114176448	-0.0359813136726189	-0.0248512135831087	-0.0174638963936703	0.00241027316887828	0.0563424244102954	0.0352822696363491	0.00195662029856454	0.0781805073695924	0.0674569408773199	0.0368882594385859
Atp1a1	M1	yellow	0.102182713998423	-0.034539515671252	-0.0623497726053454	-0.0218356452360181	-0.0125092613148909	0.0377876601430981	0.0708226048505963	0.0077402400676678	0.0361814617847477	0.135235506608058	0.113892965060628
Cxcr4	M1	yellow	0.343153791123382	-0.0238225238247733	-0.157079027406721	-0.0132579067341445	-0.0431904043182317	0.0828822941605816	0.118370881819683	-0.0838130609518079	0.0362083459809982	0.235597627639488	0.133949830648851
Romo1	M7	turquoise	-0.186862278934672	-0.103258394838443	-0.0595708719725929	-0.0754796729324452	0.112582262163751	0.191695028488527	0.174997630327558	0.0432892119334618	0.111153270521718	0.194979836716593	0.114344508663863
Rrad	M6	green	-0.0187633976381841	-0.0207222745788816	-0.0214585061462437	-0.0315404294343327	0.0459370690808029	0.0193197233914472	0.00201049335525729	-0.000670205454337383	0.054280012167864	0.0030608966149667	0.0220101077918375
Ccnb2	M8	brown	-0.0489937316153362	-0.00421889531867323	-0.000808228074753699	0.000816858746397396	-0.00034103408172796	0.0194396489700929	0.00656589084897695	-0.00880484421505421	0.00970892621346342	-0.0044270546021658	-0.00124462569708866
Larp1	grey	grey	-0.0371780494559198	-0.00606858728639412	-0.00283859117436775	0.00278138916394285	-0.014498266957698	-0.0118897145770772	-0.0105060367411116	0.00412505671452026	-0.00981986584317048	-0.00117934604096091	-0.00158322273112016
Scd1	M3	black	-0.026352824366964	-0.00610664232747121	-0.0033840001562451	-0.0569293824504419	0.0682179032622756	0.0647177423853357	-0.0104905395827811	0.00894883000600887	0.0511825662892445	0.00375974913212943	0.00474575961398401
Cycs	M9	blue	-0.0749606758824832	-0.0597314015416046	-0.0714372975970953	-0.0310446413144673	0.0526244647395853	0.112726581743018	0.153803498232036	-0.0095691397258444	0.107328790697388	0.185399994094693	0.101215291115373
Wfdc17	M7	turquoise	-0.148005079713863	-0.0945457434912948	-0.243516870399868	-0.184477446003103	0.100894094161487	0.229889620303605	0.163126142718541	0.444327633897153	0.076317722977934	0.117751810699362	0.104100038532753
Parp14	M9	blue	0.0721752211020241	-0.0182961833630511	-0.00585842171064409	0.0220844956227317	-0.0539380583651524	0.0522736447383453	0.0193959443601426	-0.0110934915052785	0.0216499756297732	0.0651137414546287	-0.0149132348590583
Gm14636	grey	grey	0.0239364719182106	-0.0582025760169444	-0.0534641292181944	-0.0753367898349904	-0.00290597596373685	0.0650166118386288	0.0502779745365576	0.0438135907621986	0.0611489186155168	0.0741625494764183	0.0682377927162688
Faap20	M9	blue	-0.0932104116422147	-0.0858212310520779	-0.0852625226063208	-0.0562987773549222	0.052904852862615	0.0859550036437919	0.073602579002928	0.00182923547346502	0.058581613436702	0.156009001988078	0.101096534589016
Tspo	M7	turquoise	-0.316028086181352	-0.145282303567704	-0.318765374112099	-0.234155828854028	0.152520528398738	0.322213848517455	0.234205146903428	0.546119069397542	0.135065540638054	0.191473212640311	0.13890686889808
Selenof	M1	yellow	-0.0880676663738629	-0.0749137413285832	-0.117306704993914	-0.0647432717692582	0.101312431717146	0.175826265253318	0.125184747892105	0.00954645622194446	0.0594970818913275	0.198500098711414	0.0953272007455008
Tnpo3	M7	turquoise	0.0350684112797624	-0.035018833486096	-0.0736084037986322	-0.0325535976318707	0.0658691881413589	0.064774179067322	0.0545806369353229	0.0713674386972873	0.0516102768627459	0.0958999481283137	0.0522688700094196
Ambp	M10	red	0.069314968711992	0.00071714859791005	-0.0428767754468469	-0.00696243371269586	-0.0109007614948958	0.00244734471645522	0.0145745216511612	-0.0184298396114996	-0.0138887904830536	0.0954347435018632	0.0711407438909303
Rpl6	M9	blue	-0.191195718965393	-0.0972089259574731	-0.166215890110592	-0.112219696494413	0.125779376696164	0.272644616402043	0.177782304198849	0.0658044421683704	0.129269813685627	0.311569803590873	0.184853433044674
Egr3	M10	red	0.151908109520344	-0.0195147136523228	-0.127625794104917	-0.0330505594630167	-0.000603259531428719	0.0290707085177125	0.067467916818316	0.0278136528002288	0.0604658869089748	0.119003550269869	0.139223965811113
Afg3l2	M6	green	0.0300132282895226	0.012942593974862	0.0205546580527776	0.00744281765297752	-0.00791249805316017	0.0313706647729244	0.0719938126538828	-0.0110848817761702	0.0158740365485394	0.0538418394579278	0.0352535293320806
C430049B03Rik	M10	red	0.0481599076350507	-0.0594982663673261	-0.0139432009150224	-0.0122255162461144	0.00714403329244146	0.052426844422976	0.0708426596305908	-0.0341325275339736	-0.0131991965405188	0.0106404962378849	0.00979571774337373
Hgf	M9	blue	0.0234623500299755	0.0128841775701365	-0.0115396353346206	0.00102235781590877	0.0145854063410992	-0.0289236464496109	0.0399055216731128	0.00121265684913493	-0.00202198664462564	0.0286370034837471	-0.011425306695481
Memo1	M1	yellow	-0.0462516285484451	-0.0507544252860827	-0.0149136801895239	-0.052102766992849	0.046399839941946	0.020403850630259	0.00322926063635798	-0.0231816675093947	0.0263196930409623	0.0234679578272678	0.0111782302279111
U2surp	M10	red	0.0185171223840458	-0.0241020118189222	-0.0616060654121586	-0.0115880097978965	-0.00985306356822645	0.0548531407381648	0.0638668060608557	-0.00908498667720367	0.053541466079104	0.079056105619186	0.131054226684963
Ciao2a	M7	turquoise	-0.22012465907284	-0.0888552521071331	-0.0964751625528752	-0.0904458094414682	0.0882902516653475	0.190979424774773	0.16938276966317	0.0560648249130345	0.0919876669382269	0.173281539610304	0.1168252322487
Atp11c	M7	turquoise	-0.095069561591771	-0.0740364486177476	-0.0393341681915723	-0.0510739219354723	0.0477541539056007	0.107098621510119	0.0841223026288183	0.0379919416731353	0.0938225229146416	0.0917370455802233	0.101639970139193
Thoc7	M6	green	-0.0432457430248125	0.0086900722052376	0.00108005614249038	-0.0274345369163819	0.00739210406543444	-0.0144270406142092	0.0491529173633222	0.00761746357403897	-0.014456602487006	0.0267084138938519	-0.0176167492119652
Acox3	M7	turquoise	-0.0547332052943431	-0.0645786011292555	-0.0676870255451294	-0.0980857310176668	0.0626434469151003	0.103150065211518	0.107498078655532	0.0858974915115804	0.0985123023243701	0.100813263774986	0.0739123968406948
Fam162a	grey	grey	-0.0190985059788217	-0.0237507076480128	-0.0428962646640535	0.00764454498485927	-0.0254962501120616	0.00594843387299052	0.0416491165462383	0.112000390117807	0.00984717564842138	0.0431786150866478	0.0459713001262265
Rpl13a	M9	blue	-0.0571428090360728	-0.0656046394164374	-0.152384001795781	-0.0799827960606224	0.0910824890231	0.181262080025146	0.183478106550572	0.01023755463533	0.142504118476419	0.265730962192491	0.148552623786806
Ppib	grey	grey	-0.178470371451096	-0.110663899265	-0.137785169949734	-0.0868073880679246	0.093886472405998	0.208802690429027	0.205176661365694	0.107619713207097	0.138678389609342	0.20736526425874	0.127491002290801
Nfu1	M7	turquoise	-0.20373813691446	-0.057104178341213	-0.0447180240949979	-0.0394530322620436	0.0741992089393191	0.182586434826941	0.151274118845699	0.0405900213058342	0.100404627867877	0.137104187274551	0.0812554551136198
Hk3	M7	turquoise	-0.243656349261803	-0.112632083477491	-0.121737734340655	-0.107039689420178	0.0992629600282371	0.228082314113789	0.194586219064908	0.136820502095484	0.180088472815317	0.182210021887964	0.179727566760825
Cpne2	grey	grey	-0.119738298822753	-0.0539384202178604	-0.0863883310019941	-0.107952476851391	0.0793883994324681	0.184760206834899	0.187145528137418	0.068761926959672	0.16025402433105	0.162785574493184	0.144674249802356
Pomp	M7	turquoise	-0.248683390142706	-0.16360614859653	-0.109046865539076	-0.115755893564834	0.0997569757497723	0.22263768676075	0.212007274559926	0.0819505974830163	0.202604178050939	0.204812110758806	0.173049685925443
Bbc3	M5	purple	-0.0383679813543585	-0.0187682382485356	-0.0722375270834148	-0.0431794948291943	-0.00548970790366298	0.0997806595257532	0.0333428141571835	0.0734090417075994	0.00844278000800143	-0.00453977853242986	0.00235485792372794
Hist1h4h	M10	red	0.0103107712225212	-0.0111098420661662	-0.0254866914792392	-0.028846137418635	-0.0157656140804029	0.0128837478015985	-0.0493596606646963	0.0138310232710701	-0.000986765118131546	0.0269311787687257	0.0648440878355548
Rprd1a	M8	brown	0.0350073631653092	-0.0379121890964417	-0.00374535224526529	-0.0276514974093765	-0.0447219478027085	-0.0293111095182811	-0.0223612050746365	0.0108568716324977	-0.00609671489620517	0.0114325025074223	0.0183021122739479
Slc36a3os	M8	brown	0.0396604046079079	-0.00920987623197836	-0.00129564770169749	0.0158751044029563	0.00372614508815493	-0.012216548218879	0.0469006281562672	-0.0349045989013218	-0.0100536410664885	0.0354388531426926	0.0423497797308708
Tiam1	M3	black	-0.089852962094782	-0.042981956645935	-0.0214741059264588	-0.037555649947101	0.00798946659959381	0.110138214114136	0.0835105257968924	0.0101157525656535	0.0376021657210977	0.0841310071044531	0.0845913472011137
Ap2a2	M2	magenta	-0.139815648760788	-0.148611927572548	-0.0913980475091151	-0.0505652660582357	0.125323181857051	0.164679744356917	0.0714006825638581	0.0387682125876034	0.0526004436657253	0.115171630941708	0.0463363733574139
Vdac1	M2	magenta	-0.124390465903168	-0.13626984425224	-0.000650857229271482	-0.0289003389196939	0.0641407453377228	0.132518090373266	0.118940073462736	-0.0212265185255473	0.0880289831164574	0.0772870738909139	0.0958211333376562
Dynll1	M9	blue	-0.0282551990416913	-0.072128770002309	-0.162334264268926	-0.0255661524378927	0.0582006524174356	0.184146085586059	0.182255178607802	0.031650199197102	0.0905150684585819	0.281867641224454	0.149429638833075
Smim14	M7	turquoise	-0.184907765718548	-0.0867340491751016	-0.0949509822735306	-0.0653188995420353	0.106310485215794	0.23445594036977	0.193184448665277	0.0932681000510628	0.141948852754257	0.205902388851489	0.147187479365825
B230208H11Rik	M7	turquoise	-0.224956876379856	-0.138396711700202	-0.129724867857274	-0.110410762743863	0.0891336208204156	0.181165435109211	0.127169135657414	0.120193990695808	0.145139142089966	0.119376349997309	0.105624295268317
Hnrnph1	M9	blue	0.0215559714907308	-0.00905736660833767	-0.0789859577566625	0.00805901250689935	0.0238134806310562	0.0593835696235429	0.0888249300773308	0.00228271005335052	0.065170914383946	0.140721637591248	0.057376845660989
Ksr1	grey	grey	0.051060917941377	0.00152836930533084	-0.0877502451160182	-0.0663234742825783	-0.0140520619674526	0.105178560056973	0.0578610160612046	0.0551656193230329	0.0115596816871278	0.043959213762582	-0.0265102247293638
Rfc1	M1	yellow	-0.0720990845546941	-0.0244193370693054	-0.0331048687090914	-0.0280090440468392	0.0519267639200646	0.136352023910543	0.0736822067676147	0.0122255053944596	0.0551000181719015	0.116334055150786	0.111723855266746
Slc31a2	M7	turquoise	-0.195178241878013	-0.0655053343988419	-0.0876700874452673	-0.0616585112648586	0.0521892093917031	0.184324358882848	0.176728755572769	0.070686035552035	0.131046794970776	0.139148300054499	0.126843394083921
Gm26901	M1	yellow	0.0808038721618497	0.0503085989518282	-0.0260282100483972	0.0106747932346921	-0.02952060724392	0.0185450459540828	-0.0190337374835848	-0.0122692087439631	-0.03996464580553	0.0376361557954765	0.0157160409499714
Gm47015	M1	yellow	0.0973766941483389	-0.0309837744191957	0.0162325066501161	-0.0072074514881166	-0.0256423069492768	-0.0220162989344076	-0.0600566019332009	-0.0473427725730941	-0.0447119543403641	0.0197790756669169	0.00189805178411452
Slc17a9	M2	magenta	-0.0924443711827343	-0.0170337903649346	-0.000457350872674176	-0.0414616522717001	0.0376721673921112	0.102345044310707	0.0736219093348009	-0.0130069919440382	0.0433734769200123	0.0936940599137864	0.0608030662244518
Sh2d5	M6	green	-0.01343265642198	-0.0325143157106332	-0.0580248642503873	0.00972910741158262	0.00696296016729505	0.01918186247146	0.0192838136691855	0.0236524632176185	0.0518718155378639	0.0304759968371697	0.081393730528966
Maf	grey	grey	-0.00745241149095607	-0.033847178872014	-0.0348402780939289	-0.00104688428793096	0.0370401138418769	0.0782559698753183	0.00211017992944995	0.00238495384292288	0.0324515192062344	0.0275843672864173	0.0490542273910966
Vnn3	M8	brown	0.0335825581724517	0.0031408254568626	0.0229794487560109	0.0262138055503995	-0.0228829498169229	-0.00943435359594534	-0.0260703698308298	0.0189721445767099	0.0436157368196295	-0.0392592061501308	-0.0195483706105824
Pdxk	M10	red	0.0359194176167416	-0.00973043055559531	0.0210240445565237	-0.0372937102860652	0.0199418608360396	-0.0127843988148696	-0.00747150872894175	-0.0381061429065481	0.00444200043797722	0.0948066307702778	0.0862904467990338
Igfbp4	M6	green	-0.0903421835721272	-0.000920337624868243	-0.0194818321706169	0.0124016622427249	0.0404687537993144	0.0696598912064874	0.0311012672741692	-0.0179871723564855	0.00169968258908504	0.0222396617462321	0.00293396230682164
4933412O06Rik	grey	grey	-0.0636592063546234	-0.0776051074109368	-0.0816213156584191	-0.0813439230675167	0.0360828691664238	0.0671331342214513	0.0587609708722075	0.0273909585596735	0.102080441755896	0.0481478507189893	0.0405599363659554
Cldn1	grey	grey	-0.0299828499480639	-0.0340045977830157	-0.0287722068068835	0.00675440907688563	-0.0375760402758294	0.0488517845367813	0.0588763618132791	-0.0147045233235001	0.0624200411486072	0.0544985903825527	0.0399249762669018
Mettl26	M10	red	0.00939680887186513	-0.0177484489626603	-0.0308712608101767	-0.00636750809111779	0.0218716189972305	0.0487385430785862	0.0168598450955268	0.00604099599315385	0.0162927161814391	0.0741968724341595	0.0458428690750409
D17H6S53E	M6	green	-0.065395758506789	-0.0305351847889916	-0.0279049008603301	-0.0093015067874376	0.0255213449812922	0.0389515071046905	0.0693874152107682	-0.00427405411707464	0.0640374042787331	0.0727142554152725	0.0516783160889983
Dhx58	M2	magenta	-0.0604687834719325	-0.0619497999416113	-0.0322588701612561	-0.0472742010384584	0.0698286307436228	0.141504376263332	0.000835592229805509	0.0258590047414706	0.0267161874641348	0.0584726311771321	0.0599358779027024
Hook2	M1	yellow	0.0924037666851838	0.0261984911098553	-0.0287198013064568	0.00621013138176296	-0.0270015388603549	-0.043175321356007	0.00447008345854034	-0.0131422954419154	-0.00417034372287869	-0.0198121391248272	0.0417350321209278
Asph	grey	grey	0.0443193864908701	0.00189826721430684	-0.124287168393968	-0.0271070724850719	-0.0133479761516271	0.0761769030814626	0.11706769073777	0.112807006568983	0.0999879305871653	0.0807876739574011	0.00219580461793183
1110008P14Rik	M7	turquoise	-0.201532593135936	-0.079954631528892	-0.106428912251988	-0.0933077572017964	0.109190600395243	0.24600089370315	0.169556640051016	0.114928448610864	0.141811224996788	0.201140549980144	0.13396969679392
Gpr132	M1	yellow	0.214465926785611	-0.0157776197665159	-0.07122350770668	-0.0645799978517562	-0.000549879705237797	0.0175322862532667	0.0639155950956851	0.038963941867339	0.0780381551233009	0.0848149886455311	0.100454419478829
Etaa1os	grey	grey	0.0353298129493252	-0.0354719701240294	-0.0129076000704102	0.025658165022992	-0.0144554803406368	-0.00267225814502553	0.033153966803384	-0.0303972586333967	0.0449241642629031	0.00271471023592799	0.0480359127932897
Parp1	M7	turquoise	-0.0328436837370316	-0.0363918791533672	-0.0109720678895672	-0.0149993828200962	-0.0372534895158142	0.0841973700798753	-0.00536415538540489	0.090798453245025	0.0397350516585087	0.0113609200184786	0.00405379202012354
Tsc1	M5	purple	0.0257089556864564	-0.0721540283501371	-0.0141577737836835	0.0207193652266388	-0.01378449980702	0.055670752096075	0.0590251864685309	0.01576291373182	0.0168972962790841	0.0444114206391436	0.0345284535337924
Cdca7	M9	blue	-0.070815460758684	-0.0251311464537133	-0.0128367157272532	-0.0129740545253302	0.0158047588139084	0.0277911058967511	0.0330774917898573	-0.0172753593467651	0.00694738553350423	0.0513230553263123	0.0343875094667083
Esf1	M6	green	-0.0188380748708992	0.0292831451742833	-0.0223984305142163	-0.0318722848698071	0.0252046349266425	0.0495473447075414	0.0800244897418418	-0.00429603826404946	0.0294334864157954	0.0742776733721038	0.00789900331769497
Zbtb10	M3	black	-0.00428042371695916	-0.00723874576568733	0.00286528200119004	-0.0959150106943953	0.000701782467148887	0.0469534875994708	0.045755240232319	0.00458728721215544	-0.0274493416958563	-0.0226483821285991	-0.023146238594051
Rcc2	M6	green	-0.02352395333006	-0.0228665797542127	-0.0395061199383965	-0.0159340381503739	0.0349466588753338	0.00364516980717396	0.0376760641857138	0.00152820171403611	0.0590343171937486	0.0341346091186242	0.00207868501986763
Tmem201	M8	brown	-0.0123644500168079	-0.0182491027347286	-0.0140887501384651	0.0397925488243458	-0.0133715557315514	-0.0447197635695773	0.00167278500251687	-0.00548443017970345	0.0403448746741691	-0.0178463124065102	0.000264411285431753
Fam53a	M10	red	0.0491917608880949	-0.0323418184131298	-0.0619706781230118	-0.0354036683793055	-0.00549140436391658	0.0248439786345077	0.0361187739550412	0.0416374059067237	0.0570722127370904	0.0446498189889657	0.0292568113556819
Tada2b	M9	blue	-0.0137388127047452	0.00303701179546334	-0.017963820618205	0.00179826490350762	0.0265464086839514	0.0614124691867105	0.0630509501240664	-0.0256026044610732	-0.0209392997472099	0.0809867681136113	0.0184575613959606
Eif2b1	M6	green	-0.06422698136944	0.0154127583459167	-0.0267478631592495	-0.0126310569619071	0.0518564800742396	0.0330518603371624	0.048090087217681	0.0172994437756593	0.0309004726660296	0.0400737802190093	0.0605942310883602
Gpc2	M5	purple	-0.0185645727569003	-0.00363189861805896	-0.0624554915860644	0.00122338200584744	-0.00256105023633268	0.0608077480355795	0.0151497972095361	0.0576615369058706	0.0701137340613691	0.0563667566991884	0.0452184913537867
Vopp1	M8	brown	0.0043718182678509	-0.00161316267518209	0.00623857841321527	0.019821042716017	-0.019388777816039	0.00284594304042074	-0.0104709767411657	0.00585244376455219	0.0157713980366396	-0.0159369757583314	0.00559618310763872
Ppfibp1	M1	yellow	-0.000456562293259626	0.0113341000254031	-0.0478668741776849	-0.0313185952063005	0.00113514641979156	-0.0238155897307612	0.00975054022908461	-0.00582613379428072	-0.00728637912574198	0.00139116333441333	0.0599259642806318
Sinhcaf	grey	grey	0.0280870392733777	-0.0238001831109166	-0.0505088736264034	0.00867392520553904	0.0199736176587163	0.0230487432405518	-0.0106671775067927	-0.0396643330584785	0.0124761210028784	0.0213766587043752	0.016016051062723
Lig1	M2	magenta	-0.017886762576697	-0.0130537359480495	-0.0239956703042632	-0.00384505223132421	-0.019388777816039	0.000609796983101527	0.00839048579960867	-0.0497737372984517	-0.00507382191982224	0.0233040205875128	0.0179924300179742
Ercc2	M3	black	-0.0713806222855947	-0.0694379442459193	0.00581284609337758	-0.0611385809553612	-0.00279476572887912	0.0750118683718721	0.0499343897565053	0.00981900160642566	0.0446602360698505	0.0174479688040937	0.098959061763755
Kcnn4	grey	grey	0.0298151022508231	0.0203265125814972	-0.00353485568803755	0.0130866701493756	0.0150699160288824	-0.00784065339755679	-0.0254735959557409	-0.023133307196865	-0.0103887053813518	-0.0244891396151808	0.0276481386445957
Hirip3	M9	blue	0.0684028925051051	-0.0247364532176786	-0.0601872614855154	-0.0523544864466501	-0.0135157610349947	0.0390424458859361	0.0292386418292104	0.00524992996506456	0.0188119441435242	0.0904895377737028	0.0492788268108691
5830408C22Rik	M7	turquoise	-0.0357463413851859	-0.0320554053705394	-0.0485731885808647	-0.0335369474786391	0.0905856005228666	-0.00100431702696086	0.0386080713899894	0.0535059996024365	0.0988791288692489	0.0289490390595229	0.0239755538681997
Ash2l	M7	turquoise	-0.078742621810721	0.0065151610887274	0.0212613211902843	0.0291453302055144	0.0224275442135191	0.0151517923251511	0.0440056100558113	0.0173118732474751	-0.0221812886241702	0.0253497507810976	0.027282536877374
Dnase2a	M8	brown	0.00635686340800459	-0.00647346295837401	0.0201977500128713	9.32838450268074e-05	-0.00266165966894975	-0.0411974166778809	-0.0241805962220909	-0.0253706602255508	0.0184826885694015	-0.0169130735849534	-0.0255047753987674
Ogfod1	M6	green	-0.0260226004739332	0.0552869494744273	-0.0233188588964597	-0.0111175539797331	-0.0176001421989382	-0.0380530626980112	0.00763172961825251	0.0108798514298966	0.0246688477006073	0.0165788154975803	-0.0153711013748058
Kars	M10	red	0.00871639473051584	-0.0240163352825377	0.00551539803330951	-0.0301135145784146	0.00758556865211318	0.0139081163027695	-0.00229538093009572	0.0268767962384481	0.0506361905781356	0.0426503141916163	0.0455087209349774
Gm17749	M8	brown	0.00847887641913682	0.000786805853811143	-0.00051713984532873	0.00634799537231532	0.0383415934602043	-0.0273291127411421	-0.0292636874162751	-0.0290193317772913	-0.0143190465077376	-0.0605557812634278	-0.0575981502674165
Ttc21a	M3	black	0.0261343542064045	-0.0144939815699286	-0.000655398059092968	-0.0550681402170692	-0.0398691954700553	0.0545860128669588	0.0106106552136786	0.00899506201612379	0.00112362396966364	0.00364031288094922	0.0109355296728787
Cfap54	M7	turquoise	-0.0161160344273877	0.0120603321275917	-0.0233000678122049	-0.0191721118521449	-0.0365870742190643	-0.00253139661623589	-0.010051957698659	0.0575963119356445	-0.000725466286173755	-0.028520500972936	-0.0257039180289515
Nup107	M6	green	-0.010822646137236	0.0114795648315135	-0.0327646579426717	-0.0497527437610464	-0.03453185227741	0.0239346793176451	0.0346986052116048	0.0639024895944803	-0.00146283362779728	0.0174416700864259	0.013835870443727
Rad50	M10	red	0.0217086023811497	-0.0626896059849877	-0.0561827610339396	-0.0495445686331339	0.0306228939248691	0.0134281205247064	0.0580548217828561	-0.0307477845123165	-0.0124149876999608	0.0688684102006128	0.0217058105492516
Slc22a5	M9	blue	0.00476882240295918	-0.0103708257376349	-0.0117395844270203	0.00340303712509222	0.0254886428184529	0.023793530907761	-0.0163212915761048	-0.0290807079793067	0.0241757073640632	0.068865615387207	-0.00429225080094702
Sparc	M6	green	-0.00563121735900163	0.00477065953268861	-0.0443393261535396	-0.0263060119759601	-0.0361601669231763	0.0140693344985111	0.0822746658422651	0.0322529530124803	0.035139570150628	0.0375203464699474	0.0234926262735089
Rpa1	M10	red	-0.0371791645373335	-0.0075271696128593	0.0145067280205686	-0.0377421743250562	0.0306676462141585	-0.0103504601805734	0.0143146709624779	-0.012629210419731	0.0275952107187198	0.0166459186051572	0.0103758515636997
Mmd	M8	brown	0.0565049455704074	-0.00427376200662535	-0.0274254539563007	-0.00369061990881523	-0.00671024898313027	-0.00597015461016984	0.0302400438389085	-0.0185212671765992	0.0467403888379755	0.0520297836961082	0.0193319041639161
Tmem106a	M9	blue	0.0364395108651978	0.000264858531790116	-0.0324847789407334	-0.016530011075519	0.0296734083880706	0.0553900372270434	0.0345203744467363	-0.0132551421256431	0.0278652537067391	0.0813087536843314	0.0141018436685363
Fam177a	M10	red	-0.0112803540043465	-0.0349076331336747	-0.02299381910295	0.012446485424346	0.0297142244441497	0.0625571117855417	0.0210017969461044	-0.0175578558834832	0.00190437884119278	0.0445093571997743	0.0399173858940494
Ighg1	M8	brown	0.00721610874047013	-0.00691139312651791	0.0612864671995891	-0.00650204756686114	-0.019388777816039	0.0113593586516482	-0.00696940996276797	-0.00251626686926261	0.0323083808646219	-0.041589027500212	0.0200651892342462
Tppp	M3	black	-0.0528058248893591	-0.00838311150656354	-0.0487235702985628	-0.0253500922390117	0.057845921777612	0.0865567453950011	0.00971139893735573	0.0274116872743565	0.0821536446011686	0.0160386883423905	0.063679190611464
Phf7	M10	red	-0.0257870935356625	0.030408591989123	0.00116473808601745	0.00355018088225718	0.0364066167486253	0.0387860081707868	0.0327572787705386	-0.0188797093289304	0.00498169417343155	0.0815038282821117	0.00706991647311786
Gm16575	M4	pink	0.0454877543971852	-0.0294098925894478	-0.0702309036958405	-0.0247938289694266	-0.030677127801938	0.041064420355016	0.0440510806717212	0.00639692824339704	0.0327329945126756	0.0584498784995859	0.0790900967985287
Bcdin3d	grey	grey	-0.010971402446415	-0.0251804820382765	-0.0562906429934628	-0.0769122844119813	0.0171058078294726	0.0733721711213694	0.00510352864416951	0.0152577565603976	-0.0209905711019448	0.0522264456124496	0.00377195442082878
Smagp	M7	turquoise	-0.0315764507436027	-0.028561193822645	-0.0635167181459856	-0.039573092789776	0.0410021304731428	0.0811822931887037	-0.00659346852988151	0.0724043297320248	0.0253948961420437	0.0289272276284579	-0.010076508671402
Cldn5	M9	blue	-0.0650790594978239	0.0115444919087689	-0.0274643657683998	0.0369418545188803	-0.019388777816039	-0.00156789721981562	0.0116764859365955	0.00245031858761787	-0.0167296347985729	-0.0221366151292474	0.023571508885311
Heg1	M5	purple	0.0174471608819148	-0.042648337925447	-0.0503813630409798	-0.0250833226305341	-0.0488228349764446	0.0724270281266092	0.0349145248710008	0.0484688986716184	0.0520823126633384	0.0452252735274023	0.0395120122794006
Vmn2r96	M4	pink	0.0201528186543685	-0.0493612419106287	0.0365769029087931	0.0529580459624908	0.0189542688014798	0.0294967845413623	-0.0408735982674224	-0.0496860883819872	-0.0138028329395118	0.015886960009175	0.0169895259513583
Fance	M4	pink	0.0163011718328306	0.0136645660196484	0.0109324688247683	0.0407973341573425	-0.0747978057400214	0.00570070383710192	0.0278999780548415	-0.0295636717530098	-0.0504929485045591	0.0283540653037684	-0.0556281407956804
H2-DMa	M6	green	-0.0148426774801931	-0.0169287430102821	-0.0171104345271411	-0.0387957371806678	0.0977850614405725	0.0309873803016097	0.000831790869559044	-0.0158317833152012	0.0312883619806358	0.0434307848303374	0.0432184678815838
H2-Ob	grey	grey	-0.000466906283573561	-0.00403498774500013	-0.0152269312075335	-0.0294498443046216	0.0792844822238923	0.0507207741053497	-0.00823250396743942	-0.020560789246888	0.0545470119519235	0.0139005432299588	0.0411932136955488
B230354K17Rik	M8	brown	-0.00675959577795929	0.0288864716335444	-0.0421937198440884	-0.0373186072378527	0.0372561295572057	0.0241631038733471	-0.0110820831782858	0.0209735121973716	0.000323367668542542	-0.0358852575175123	0.00151909241475026
Zfp119a	M5	purple	-0.0277632648674641	0.0546942394465548	-0.00352640259304311	-0.00159017662734981	-0.00891857036095411	0.035535227408354	0.0201037226932209	0.022490736447433	-0.0405515080282452	0.0059572903634906	-0.045410372977667
Ppp1r14b	M6	green	-0.0450422280918324	0.0269235693273263	-0.00125820251082982	0.00822094536376103	-0.0508346062890667	0.0165732353647539	0.0370712590640703	-0.00422665618991655	0.0269503627406367	0.00251589939093465	-0.0199752739627687
Ccdc86	M4	pink	-0.0371797486342498	0.0263966362957237	0.0420154041938906	0.0426680817624968	-0.0111285060692757	-0.000941233908656505	0.01423602969509	-0.0268446975499049	-0.031702188417915	0.0261138919617748	-0.0030173766536089
Arhgap19	M9	blue	-0.05809630352239	-0.0691699712852368	-0.0443190131082319	-0.0512176845269409	0.0404730205762306	0.0564996256035104	0.0584039439088297	-0.00768912817856064	0.0967390854359817	0.0737900477702115	0.0476312490054055
Gm6377	M10	red	0.0540745189374327	0.000273368152197373	-0.0617293750738794	-0.0247298930609939	0.0282686567033104	0.00504720403400031	0.0444389793117393	0.00349371407216171	0.0197471331216295	0.0689888007407382	0.0241293436146031
Tlr7	M8	brown	-0.0105760126844278	-0.00536464941730805	-0.023705758352359	-0.0280058106377683	0.00466118359467936	0.0277695922659551	0.0342451834942882	0.00203419980684632	0.0489110147725034	0.0573153726403635	0.0767749214842819
Ccdc174	M8	brown	0.014251710875206	0.00479242628214864	-0.0144274398092992	0.00187121850191071	-0.00518471185232734	0.06612877358167	0.132879631895431	0.0658549828096827	0.0911922215621529	0.0021728596280668	-0.0110636012469967
Rgs18	M7	turquoise	-0.198940352081184	-0.133964511532345	-0.0964414467581686	-0.0691508469120738	0.0655933318227134	0.214384267934961	0.17141273768209	0.093510365371374	0.141795914868522	0.181423356620222	0.101493172109317
Ppp1r15b	grey	grey	-0.176526685733598	-0.119926345457697	-0.183511706258125	-0.0920306176820108	0.0455381529591982	0.210287517367436	0.172827019996124	0.075463295866503	0.166878378882251	0.194284825526514	0.134147341303465
Wwp1	M7	turquoise	-0.109236555009866	0.00456185275901733	-0.0372826200836773	0.0251416077596128	0.0364086820698657	0.073291387908897	0.0270543302482867	0.0690739818926483	0.0404663567269223	0.0373263203842734	0.00743919314376745
Zfp445	M8	brown	-0.0869642505920226	-0.00136402177616188	-0.040580753158935	-0.0291378471105224	0.0137938663725476	0.0611044791303346	0.100375033102853	0.0426251582475177	0.104521102642387	0.0862132309295704	0.0713613877270616
Sftpc	M1	yellow	0.0362095417450168	0.0530656872024822	0.071852664352547	0.0384344291006455	0.0673669947383751	-0.0308578170758883	-0.011190019948014	-0.024447802959984	0.0114910248516408	-0.0625284385106725	0.0715605315733991
Lrrc58	M6	green	-0.0477768819191384	-0.0209621417160858	-0.090194044030959	-0.020718763489646	0.00141723199913072	0.0780655938443142	0.0643946744822409	0.013930885996166	0.00951517404958609	0.0873828130052404	0.0776993527775315
Siva1	M9	blue	-0.0109350315349025	-0.0419526675385944	-0.0462124594259783	-0.0417136488398512	0.00223182172637462	0.0888427970085868	0.0325096852816134	0.0312194063636161	0.0348944552889604	0.0800314948854421	0.0367690035008256
Eif5b	grey	grey	-0.048255215415811	-0.0998456071049047	-0.122139438654776	-0.0509485719575419	0.0721272327990958	0.107617902647862	0.077755345024229	0.0633910299924394	0.0596771324631055	0.132480634677401	0.0576988734025625
Gcc2	grey	grey	-0.0591065474965271	-0.0367139158096762	-0.0422531120970254	-0.054633693842415	0.0279782155270719	0.119519813059076	0.0649146861316746	0.0366557805071	0.0511144601943566	0.0821959062633212	0.0463504950664722
Fbxl5	M5	purple	-0.0827342186486055	-0.134840464816715	-0.244307009315195	-0.142006398889005	0.0196536954556983	0.310080760370873	0.175211441332899	0.209970311967362	0.206342731044776	0.175334411488125	0.182101458994375
S1pr4	M7	turquoise	-0.215408368960029	-0.0983271308953018	-0.090535987895417	-0.0787062041054606	0.159942242315338	0.219254242872297	0.156884411783444	0.0437312532399484	0.155560410365434	0.190840746317081	0.13558846111123
Efcab14	M6	green	-0.0122034877539976	-0.0246727304556046	-0.0522212955405851	-0.0302755458324938	-0.0186643566950918	0.0364350393190471	0.0713168150734652	0.021371850198223	0.0564460182638031	0.090105305940421	0.0624762196176774
Dbnl	M7	turquoise	-0.248064061457197	-0.129990235405551	-0.180563276708934	-0.138417256937818	0.0976520605245387	0.262814516025312	0.22086981240074	0.127573343054838	0.168247854754704	0.216132222042531	0.133152443031745
Pom121	M10	red	0.040810078550898	-0.0495979661881583	-0.0497191876935773	-0.0720988564689367	-0.00881544551909634	0.0381749170193213	0.0749056904592707	-0.013744816753968	0.0332231470453752	0.107457711981534	0.121781397397026
Gnas	M7	turquoise	-0.17837176357541	-0.0429978992813953	-0.14542183079215	-0.0974420960827996	0.0761057675740119	0.236265622208657	0.183493642124978	0.136760669317517	0.159509904639131	0.152981866229272	0.143634889804118
Tgif1	M1	yellow	0.276590122901794	0.0544552599431843	-0.0507501576960259	0.00816143145718444	-0.0138442502224244	-0.0210533091876456	0.0248762434526637	-0.0414441939034131	0.025269481688115	0.0527194087679423	0.108598633457034
Fosb	M1	yellow	0.36382377744737	-0.0160527137936829	-0.0727999230875188	0.0124934487203075	-0.0464440934411612	-0.0721722872604469	0.062822485678334	-0.0861616789725239	0.104547753148564	0.0723529165960295	0.0897426652527682
Dda1	grey	grey	-0.0794488842977598	-0.0163189333709067	-0.0923485815686767	-0.027598304100141	-2.50354569757798e-05	0.0954176472194183	0.0876133996629782	0.0240945508371338	0.0621215402064089	0.109161348734179	0.0453880224474838
Dars2	M8	brown	0.0574464500801643	-0.0264157374238086	0.0150563062529636	0.0484188453464402	-0.0315292371086147	0.00564578195392088	-0.0111082172975687	0.0137239669404214	0.0505954851043787	-0.00284044293021792	-0.0163607579750478
mt-Nd5	M6	green	-0.0463576507394844	-0.104344151075161	-0.116624035706516	-0.0815912505669309	-0.0143685397172822	0.149633475679593	0.344366061265063	0.0946534441616854	0.126430225407012	0.11941674891321	0.0787332874761723
Rps6ka1	grey	grey	-0.137514941764641	-0.0879801483469793	-0.0799491747123444	-0.0458934510696193	0.0747926188256506	0.16004420128113	0.187609359232587	0.0105625670906441	0.109765411292521	0.208269335060693	0.133400395622182
Ptgs1	grey	grey	-0.06063686143736	-0.0412773594356047	-0.126562090007129	0.000840253012434957	0.0512998750754947	0.137586430460128	0.163898900699069	0.0517453580643287	0.0670413843052065	0.160344845102838	0.0744549473665006
Gk5	M9	blue	-0.0579749940763662	-0.0437960714074642	-0.014446034094828	-0.0480359000191526	0.0220913168882085	0.0630391835312702	0.0442908348631419	-0.0320767554755367	0.0326538490576361	0.091170271849806	0.0925868521943917
Dhx38	M6	green	-0.0551284989805024	-0.0714501632753882	-0.184842449533944	-0.0760585019923001	0.0353558887112286	0.143606895611106	0.137880699282185	0.159055521312203	0.127325561771943	0.135202905984293	0.0697831325012273
Ppig	M6	green	-0.066508699174056	-0.0611691738054384	-0.104183558949874	-0.0544894303536329	0.0211487998028528	0.158312264838385	0.130332237113651	0.0524800941716526	0.0455513944317514	0.146523232105355	0.0726586701910346
March5	grey	grey	-0.0194567420522301	-0.0245767266439104	-0.0329394339322534	0.00887654117188018	0.0666232245568095	0.021220961683954	0.0631156558010609	-0.0186321493111869	0.0719526808137597	0.070657548401104	0.0570239126708339
Bcl2l11	M1	yellow	0.107764276593911	-0.0593382440897275	-0.200294384429372	-0.0773106517699616	0.0214655555018416	0.11583799653463	0.116494597443745	0.134614036363589	0.101708064516038	0.144845976554301	0.0919382643381126
Uba6	M4	pink	-0.0395092513831551	-0.0362195500323222	-0.0575199612412745	-0.0389588584149898	0.075962634121201	0.0732383842374932	0.0362677748394273	0.00687769805372085	0.0658317112326706	0.038724064206191	0.0635484848539204
Echs1	M6	green	-0.0805714665618996	-0.0668701882544764	-0.0603984512937296	-0.0507781776890681	0.0382953365849281	0.0581395004786831	0.0847104139823764	0.00885648798977278	0.0491966982357573	0.0546220786714222	0.0571478205500647
Dynll2	grey	grey	-0.0254133746857783	-0.016713859968554	-0.0260999132531504	-0.0349268798228084	-0.0248356723509208	0.0276238097412942	0.00607041101929864	0.00565308010242792	0.0269088886486293	0.00276847938758585	-0.0164888721160989
BC005561	M7	turquoise	-0.0448032373569649	-0.0148213533782123	0.000385392685075964	0.0262475481428367	0.00963836630359751	-0.0194356496258587	-0.000160328379072202	0.0607641947835634	0.0279400905773861	-0.0355704936884502	0.0551285986641255
E2f8	M9	blue	-0.0539029928863455	-0.0182006384353062	-0.0256744064370973	-0.0268610651888276	0.0785928828032924	0.0814970123024868	0.0441881849380756	-0.0202995291853715	0.0650468302539186	0.0896224154674198	0.0748852175418956
H2-DMb2	M6	green	-0.061754048183508	-0.0900944867783778	-0.0147108813839639	-0.0399140560958205	0.0150592907934373	0.123768254540405	0.0979510772990179	0.0267340771398296	0.134428477030037	0.0556283823619162	0.0196782510195598
Foxo1	M4	pink	-0.0159559499993438	-0.0220973459030019	0.00377030992495856	-0.0397752360725419	0.0605611611350335	0.0659188794891106	-0.0123876256428597	0.0133027762314338	0.0561453640960736	-0.00830131625747082	0.00993157301778052
Gbp2	M1	yellow	0.0494825453829076	0.0356713554164976	-0.0507106997065986	0.0246855590791361	-0.026696831286594	0.0615194100572729	0.0322336258505454	0.0608570685247887	-0.0207257538740063	0.044659523390069	-0.00725438047315358
Cpsf4	M3	black	-0.0092181436109928	-0.00469452455268987	-0.0226781401656028	0.0204999629969769	-0.0479361088097091	0.0602590445419119	0.0193943082233104	0.0366407696435548	0.0144099427976176	0.00796139986410225	0.0275528942802171
Ube4b	grey	grey	-0.0817903702081227	-0.0291812290243737	-0.0734521510584827	-0.00775245520880196	0.0603387312583355	0.11105926318129	0.0324587096593576	0.0371383619177271	0.0162421940749705	0.0511195583919728	0.0389749687973675
Aurka	M8	brown	0.00608051085017966	-0.0473953817166947	-0.000538178657948801	0.0244798222270544	0.0634034205690106	0.0401832131898444	-0.00188884440673053	0.00594955475756923	0.0559220934315539	-0.00445604078357177	-0.0133125734655475
Tcf4	grey	grey	-0.0308819092536713	-0.025034956040171	-0.079657824912268	-0.0730319573642831	0.0318016368930976	0.0707773625187558	0.0227150331769162	0.057670541715698	0.0531712138233561	0.0397460639508947	0.0236991182336493
Tbrg1	M7	turquoise	-0.0811661485921903	-0.0438366336002715	-0.10770688889935	-0.0339455055091659	0.029664104684658	0.13185606800766	0.0786218503693836	0.0839673771248773	0.0996472016227771	0.0510786738326833	0.0726560654278447
Hp	M7	turquoise	-0.195637092045077	-0.202498985228809	-0.315172528753063	-0.248340503607376	0.095308324566229	0.30969234775127	0.181773801228507	0.493778786243909	0.274453334949818	0.131836247584798	0.17748994438579
Pim3	M8	brown	0.115116191140986	-0.0317268133685389	-0.052077222336176	-0.0174867873369643	0.0175300750058961	0.0494979647428515	0.0497903906288158	-0.0461404139394513	0.0578569387063238	0.0796356911621563	0.067418774323718
Usp39	grey	grey	-0.105631957847661	-0.0606480389477153	-0.0841731971121838	-0.0361389352911799	0.0778975888701175	0.120887064250377	0.0977266121228655	0.0319895390291409	0.0574650365669172	0.10592499099436	0.0337482612134767
Rex1bd	M5	purple	-0.0987866570150643	-0.0320385868144405	-0.0537175079845706	-0.0133265693644243	0.0824493550702779	0.192927170639092	0.0673559188187445	-0.00112499817497815	0.0337257377798632	0.0703594266602669	0.0384914926257863
Hmgb2	M7	turquoise	-0.197038743802821	-0.148959060579312	-0.334035959484606	-0.246377371316988	0.0698942628022451	0.364995813292397	0.219102325907152	0.45546675654302	0.245204254594657	0.18664410566823	0.186662016554648
Tpr	M9	blue	-0.0115439521766391	-0.0890516043894597	-0.1315988486995	-0.041557447770793	0.0537563744848349	0.136055672038609	0.140585195777374	0.0158873719502169	0.114743670506753	0.2371379353862	0.127044195376828
Pde4d	M8	brown	-0.138226533323656	-0.0781372964353532	-0.0342857928245784	-0.0300563882985077	0.0245728709772729	0.0973663373698985	0.0887170351730042	0.00638437519269936	0.0747066694453329	0.0745388199580871	0.0884812795588964
Eny2	M9	blue	0.0137558116389556	-0.0241472976504733	-0.00567973805937004	-0.0381888497137479	0.0191325730071904	-0.0116150024913903	0.0211995284033666	-0.0450292683770704	0.029097796380587	0.0377318033353601	0.0217956130239786
1110038B12Rik	M8	brown	0.0549325600125637	-0.0222702621865276	-0.053931006911536	0.0341162172184226	-0.0351676008222943	0.0183846542441502	0.039727594845168	0.0144370243049251	0.0360001073255054	0.0308762693415783	0.0312642781259655
Casp7	M9	blue	-0.094389859980288	-0.0326894180755114	-0.00711999599750772	0.00902878204287557	0.0514056021583578	0.109019191462095	0.0846227847859831	-0.0153167250750603	0.0209763007525043	0.100069118475158	0.057835698057275
Cspp1	M9	blue	0.0139933329360311	-0.0203847216675543	-0.0877077010315241	-0.0498681581775491	0.0913797936623968	0.0925083431459218	0.0706201787300698	0.0144432159080761	0.0443642682464858	0.114583569317014	0.0881854965171032
Sarnp	M9	blue	-0.0950278152372845	-0.0628816083087279	-0.0826661530083234	-0.0503964372762446	0.0811595738240639	0.148739327136566	0.15124011694204	0.0254681503226151	0.0950340853657473	0.137529589716333	0.0993134773580296
Glul	M10	red	0.065859278833869	-0.040079851331985	-0.0923692730719695	-0.0751510316250618	-0.0121302373613267	0.0580690940943914	0.0874048633384721	0.0777829426047564	0.0463144827174659	0.111991286904389	0.0227727553326469
Cd274	M1	yellow	0.181345887780779	-0.00717233800143156	-0.0814802686432998	-0.032121903618042	-0.0202711896067473	0.0463237846404235	0.0515267491690738	0.00330811130021224	0.0196183101499515	0.0474590205858478	0.103775685186099
Cops9	grey	grey	-0.169219905492273	-0.0984802692788745	-0.164740255692731	-0.0768091452634682	0.159641354459335	0.241721432930083	0.216630542034041	0.0908932525457323	0.167206416853948	0.239710206000823	0.0908584701346389
Rhov	M7	turquoise	-0.132750555305904	-0.0376349313989326	-0.212912747522731	-0.0860726726944105	0.0598107206753684	0.16008682820296	0.131519085618063	0.301537472252498	0.162230490923237	0.0862949034899154	0.100263740445173
Xbp1	grey	grey	-0.0456229060230954	-0.0104236366842526	-0.0984837204709752	-0.0573091296026066	0.0208112366821286	0.148531541301727	0.0568904277743072	0.0410340349191082	-0.0149781494569994	0.102316186998446	0.0659297807369154
Cmtr1	M8	brown	0.0290541532854233	-0.0723055697573711	-0.0661216419200134	-0.0422326053745122	0.0191734654257352	0.0765347479747109	0.0391996848803738	0.0566564856888499	0.222170602205833	-0.00218879610307057	0.0396496579761775
Msra	M7	turquoise	-0.266741364728297	-0.171739162384909	-0.184114413362584	-0.171554054201895	0.0859354474172567	0.263242743291609	0.238469843390806	0.208676675108347	0.232297604315197	0.195910911623005	0.196925150779784
Ppm1m	M7	turquoise	-0.254437680409729	-0.132421981465436	-0.130086744253949	-0.126265307203402	0.128730849956808	0.258311464991586	0.207890595875508	0.0549464236437785	0.169075985173831	0.200554767224518	0.185165924877054
Selp	M7	turquoise	-0.0855648347174825	-0.0446107763213629	-0.100221429127296	-0.0834034505504171	0.0141099811580235	0.0966844002434008	0.0790513101287757	0.112978530093659	0.140616488900701	0.0698484178438025	0.0500895581388635
Vcp	M10	red	-0.121329619297584	-0.0586874507688472	-0.0553146127997498	-0.038510442772443	0.0189893951412333	0.184306232907937	0.136158278847505	1.01452757058154e-05	0.0685036429533568	0.145091482439439	0.143336223777709
Spcs2	M9	blue	-0.0732641472194319	-0.0581482984461907	-0.100124369106359	-0.0266411470559927	0.0422199745810775	0.156771606613231	0.132858709983852	0.00987103946382521	0.0902843355847732	0.153821747622079	0.110016854369515
Fermt3	grey	grey	-0.168380185668614	-0.05806335890532	-0.174861924514725	-0.0975801921650578	0.130210332171351	0.2237618255266	0.204784141431512	0.10280021829052	0.090380990574381	0.189748214688106	0.16134028470981
Atp5g3	grey	grey	-0.128010517561267	-0.0806230324579956	-0.102127192417849	-0.0870335393067074	0.0287744002034278	0.16147430298316	0.0648057024525563	0.00725439614533976	0.0814223875570965	0.116943648774187	0.0496837462980615
Adora3	grey	grey	0.010988938306481	0.00605990781797562	-0.103329007152976	-0.0553082311274121	-0.00468522411674103	0.0495686121419413	0.090907882132667	0.0241907059819138	0.047620771791962	0.0740164124464259	0.0492530938837002
Ano6	M10	red	0.0427863471082246	-0.0429205000307471	-0.057401646184897	-0.0695257587564018	0.00468429397572865	0.0585462234707734	0.0516613398107597	-0.00529338465466374	0.0749609164187051	0.0681009964291589	0.0442865106976147
Eef1aknmt	grey	grey	0.0242235117638918	-0.0297782334051488	0.00180755311736264	0.0334678249277619	0.00259912673343806	-0.00118928067392323	0.0131669886827197	0.00679628665875567	0.0558151523499288	0.0582312864948472	0.00169259654623641
Olr1	M1	yellow	0.129262679002431	-0.0309865467292903	-0.0103273649083198	0.0409026909478555	0.00576595633197512	0.00881563444306632	0.0181772125751905	-0.0151209152970286	0.0574178334462558	0.0563495510431801	0.0430374011575477
Gm10076	M6	green	-0.0198097709451871	0.00387228152810052	-0.0442294806872153	-0.0270917429981954	-0.0114882120139255	0.0976729881163179	0.0862579574484311	-0.00712228977880909	0.0455031292912388	0.0546111463513395	0.0681878273794692
Tmem160	M9	blue	-0.195905962089218	-0.0509408711034004	-0.0410330282401846	-0.0597165850584386	0.046514112059474	0.154846832851076	0.137215959809782	-0.00107064393697633	0.0932543636402735	0.166079213787678	0.09101101144026
Slc4a7	M9	blue	0.10872231612058	0.00582585366196096	-0.100411764232511	-0.0575263308399414	-0.00964627106656749	0.0630679774149207	0.023414757885816	0.0177279570063828	0.0448507407794638	0.080706818014108	0.0306661032477424
Rbm26	M1	yellow	0.059591992188964	-0.0359821780770789	-0.0411431473363504	0.00563767543118651	-0.000443854407485897	0.0513473032187535	0.0460957741579446	0.00415535653680086	0.0602198590449814	0.0611462584451289	0.0280547260075139
Hspa2	grey	grey	0.0661675137505077	-0.0288703686259623	-0.0922430640928874	-0.019395613474039	-0.00866316100683467	0.0660847349589379	0.080465186451877	0.0352287480046586	0.0182900591328753	0.13524351621595	0.072705880088976
Cd47	M1	yellow	-0.14035945926817	-0.123624831974125	-0.161467015847196	-0.119752248045648	0.103582556351149	0.307225698881791	0.233877615245773	0.0380473422126824	0.139464047912184	0.316577433124957	0.209597391601314
Prr13	M7	turquoise	-0.22715855062926	-0.158837740521927	-0.208164544840617	-0.166961669408966	0.0630608626428679	0.193213273696271	0.164384811844975	0.501613829668062	0.25158624337326	0.0417604932043036	0.0723682952865078
Set	M9	blue	0.0847193021855031	-0.0717145680024402	-0.103863460619383	-0.0397233539768917	0.0376940420993524	0.0548573375666184	0.0242247907070364	-0.0306267307621855	0.0223677677719542	0.156184252671537	0.099554009473896
Vasp	M7	turquoise	-0.137970853024663	-0.159345214047515	-0.290461569551461	-0.12989684140994	0.0979905342839256	0.25111568194357	0.244286466661419	0.381855941887715	0.249628634357024	0.101183030732827	0.159400788552345
0610030E20Rik	grey	grey	-0.11974905412108	-0.109592404470688	-0.116084201007262	-0.074237981685577	0.105508171925778	0.129036311510673	0.126399782751022	0.0162831159475129	0.081790148039962	0.110428678361312	0.125712860165223
Ankrd17	M1	yellow	0.0312345127987941	-0.0756838877648492	-0.0751235617827654	-0.0513484917502837	0.00434071412381129	0.117935233766752	0.0537092359324986	0.0286495703263615	0.0869200475640295	0.0588438586074399	0.0447070976765662
Lrrk2	M7	turquoise	-0.228398711973364	-0.117555868332549	-0.136639199433906	-0.132079651231669	0.0332436286720729	0.164352167607304	0.189822087174092	0.123117582670059	0.189332370662789	0.150567628643939	0.154876080502095
Denr	M8	brown	0.0137577348106763	-0.0682115990988546	-0.0752633628513534	-0.0131560279486803	-0.000632435783206524	0.0348205330575265	0.029015027778363	-0.025158476569427	0.071143628203511	0.0894413421803489	0.0556643378612504
Rpl22l1	M6	green	-0.0534748912283736	-0.0285696795341611	-0.0736019112833465	-0.00925491015870241	0.0669982899832909	0.101057619901425	0.113687442179476	0.0947137081273706	0.101525997481084	0.115436015471402	0.0361728068443038
Ctsc	M3	black	-0.0715299858153653	-0.0680887105304364	-0.0926747739187094	-0.0257753460808138	0.0345883176044844	0.0853950001677477	0.0650375951778021	0.0489993150511993	0.0834278474634902	0.0718594633648643	0.0945992144654391
Appl1	M9	blue	-0.0371430147638961	-0.0208972888687475	-0.0200506823145606	-0.0612805181713748	0.0256635531349639	0.093224393387985	0.0543398312231242	-0.00990980715723895	0.0147197886644415	0.102758757975882	0.0729543832905827
Hdgf	M5	purple	-0.0417203732508157	-0.0479297214260821	-0.0333070759834236	0.0259173278963015	0.0295533389691259	0.181850563937021	0.0856365633176876	0.0131009965039803	0.0472354673772725	0.0516549806041046	0.0367682579109033
Ap2s1	M9	blue	-0.195577496036889	-0.133915343472177	-0.158336378395912	-0.105623956493832	0.10559758015761	0.270697981119817	0.240936791571674	0.0464381335136331	0.155441322272167	0.310835161651179	0.186670823248359
Rac2	M7	turquoise	-0.110831171193472	-0.144998489184611	-0.245033832726807	-0.203143423368998	0.0660702638931847	0.220451737976873	0.125014740892056	0.482598549972122	0.136636770467356	0.14403235458995	0.109194947472927
Capn10	M8	brown	-0.0181320391048676	-0.0432653149760765	-0.00230274033180287	-0.0232792787078113	0.0354513520775057	0.0499927675317752	0.0167541756456773	0.0184400081898308	0.0473418508261238	0.0268397256474994	-0.00174616311371298
Zer1	M7	turquoise	-0.0241703530640136	0.0129245165778025	-0.0434927458172148	-0.00992835285825377	-0.00124955828994553	-0.00723093554605659	0.02411563425553	0.0685433690874436	0.0548758118953111	-0.0121489287413685	0.0255521280280275
Ints3	grey	grey	-0.112769128547806	-0.0250967771229092	-0.00965102422877531	-0.0219789748236009	0.0810351933331627	0.0723334357494396	0.0644372765787555	0.000993787763620734	0.0462012175300683	0.0907822529516315	0.0533530285093337
Smim27	M9	blue	0.0171940359574841	-0.00420522833518332	-0.00275198003682357	-0.0169584841452039	-0.0430899597876372	0.0123193454314768	0.0240630476847383	0.0187693994079617	0.00447714597510378	0.0402718303982423	0.015350455721703
Vps33a	M10	red	-0.0382991476607224	0.0053422353408975	-0.00564484444057073	-0.0168862371481978	-0.00557515543058669	0.0913772234637269	0.021119078494309	0.0177358552269798	-0.0194577239141568	0.0507322780277605	0.0591796530631061
Lsm6	M8	brown	-0.0894502340366318	-0.0180011660082719	-0.0162701839186425	3.87787658103393e-06	0.0311196947257355	0.0735973282149129	0.0458657887126335	-0.0111337903102798	0.0456129780974171	0.050590958457934	0.0282839209538587
Msantd4	grey	grey	0.0129066004314144	0.0124712420000857	-0.031966281498528	-0.0543917317462637	-0.0154781741563812	0.0425101024909354	0.0380175669720128	0.00921169169151555	-0.0102934993696074	0.0442218189713288	0.012444119633852
Vwa5a	M5	purple	-0.0388165734885555	-0.0255040587503595	-0.0188129598371791	-0.0338571952512616	0.0718332041598289	0.0653783286464314	0.0400006899460477	-0.0115963182061214	0.0246181092356714	0.110030508413637	0.0449790364414339
Cul5	grey	grey	-0.0294132690141062	8.81193742659272e-05	-0.00923440436085578	-0.0105608468438368	0.0230988586543044	0.0321893262014269	0.0282788725204488	-0.0211067765728111	-0.00972992699728057	0.0307910134681808	0.00300008388208389
Fut8	M10	red	0.0237399624924078	-0.00689731060472696	-0.045385099847929	-0.0193600162078579	-0.0226967932184817	0.0485040485910061	-0.0223930313886635	-0.00717245004051325	-0.0407972030447356	0.0323777442244269	0.0121349179306785
Gm49767	M1	yellow	0.0912273078303474	-0.0587352467449982	-0.00415187744174303	0.0122589104185434	0.0379096181672796	-0.0380767878012799	0.00536703697601292	-0.0551842336642999	-0.0151835925964435	0.0779041644548978	0.0245386849503778
Map3k4	M8	brown	0.017456006220859	-0.0135920156288057	0.0185141823631479	-0.0426861136590022	-0.01520553623279	0.0235839901878878	0.030946827654002	-0.0173865605886915	0.0617612077722063	0.0218774565627171	-0.0131156504306149
Gm3448	grey	grey	-0.0035046851537349	-0.000262441811600957	-0.0139793060326056	-0.0148703150264034	-0.0459916316302642	0.0353316865383064	-0.0269591031227423	-0.00727831841014615	-0.0219210199311726	0.0209473576792653	0.00439569411708391
Zdhhc24	M6	green	-0.0264434067575862	-0.0305768790456561	-0.0593147514901604	-0.0482463595321783	0.0690494314572232	0.0947780729503481	0.0896129564423705	0.00956666129609129	0.0613415557252278	0.0619430194385557	0.061114354199348
Rfx3	M10	red	0.0425165124000033	0.0101941170743138	-0.0521748538977205	-0.0645081960022978	-0.0227569831256127	0.0713487012695344	0.0415220025223127	-0.00736127872366222	0.0167327035002485	0.0721234707977198	0.049964849697162
Mrgpra2b	M7	turquoise	-0.12704709924995	-0.15184325488361	-0.235269069456145	-0.158170134343921	0.100756690519956	0.22161204333887	0.208025862151869	0.422679043383735	0.25718364534933	0.066027750478344	0.164317612863397
Zbtb7a	grey	grey	-0.086478413952761	-0.0918175597022054	-0.0608970375175274	-0.0293510908972492	-0.00645566972646202	0.14735285251284	0.0823250585972219	0.024957920133275	0.0679404800338082	0.105863893362196	0.062525629418751
Pdcd6	grey	grey	-0.224748607165958	-0.133587228307762	-0.145855350998666	-0.0856574210602977	0.119566017420886	0.229474185060527	0.233986371650782	0.0640170704553448	0.190706175328015	0.228337551932368	0.165679364471657
Klf7	M2	magenta	-0.0819631627081034	-0.216131779804608	-0.0671759184030501	-0.0325365566425198	0.102020479605763	0.169430156292475	0.161619239476624	-0.00201622244258776	0.0937453074523799	0.185148676122297	0.141241273159174
Ctnnbl1	M6	green	-0.0566123887726825	0.0122912638734835	0.000370345502727144	-0.0111511373949686	0.0480361117181358	0.0460418298614572	0.0942951986846454	0.0234736892058287	0.10825527313334	0.0359829370562558	0.0328257072432345
Fam49a	M9	blue	0.120206283086328	0.0312517036645058	-0.0442352297738793	-0.00330395886370309	-0.0427949829161889	-0.00608047328413324	0.0138236818379817	-0.0552379408779874	0.0247797242827774	0.112245368203701	0.0658451504689759
Leng9	grey	grey	0.0649247286185138	0.0360119317252485	-0.00935331529259267	-0.0238514967861231	-0.00399579798961286	0.0462949271911791	-0.00466759799286807	0.00122543260329377	0.0315432774313593	0.0527343576108841	0.0522927190167884
Wls	grey	grey	-0.136303534363934	-0.0623054004902244	-0.106581312104541	-0.0708743246927563	0.0543925309316844	0.159364597042732	0.114517459506056	0.0345435825854279	0.0650499286161108	0.141208201633359	0.0637743233098662
Zfp157	grey	grey	0.0147332303234084	-0.00618940067768696	0.0281584145321544	0.00814447299123966	-0.0129651511307405	0.0738359259889112	0.0499837523288537	-0.0184912735482875	-0.0174737885529065	-0.0214882481858788	-0.0259984376385876
Spib	grey	grey	-0.00322541860993744	-0.0371504557961954	-0.000322117632316913	-0.0294986687604662	0.00922465109405712	0.0737382470403225	0.000670911675019997	0.060214142043939	0.0567055058826207	0.00299612121180161	-0.00399230111278247
Matk	M10	red	0.055409492922779	0.00548161446283263	-0.0229606327550025	-0.0434050388798055	-0.0278839772534373	-0.019917929466509	0.00926587193582427	-0.02550420174104	-0.0186720771752392	0.0563236934386541	0.0430073276015943
Irf4	M10	red	0.0422468148898827	-0.00596547842417042	0.0108441287658383	-0.041354240196857	-0.0346484325660644	-0.00640492034906449	0.00576600691393505	-0.0316950977965268	0.0015806950109785	0.0384095633855604	-0.0139128341013545
Rnaseh2b	M10	red	-0.0348330247323858	-0.0105313026548113	-0.00620941008441555	0.00957125460745993	0.000894549886209047	-0.0145404678366581	-0.00592812194120779	-0.00990843108003223	-0.00855085097968501	0.0130952541059293	0.0132374253720184
Fancb	M8	brown	-0.0149392290065276	0.0335746754723861	-0.0516585839439872	0.0264186480772849	-0.0440213384861716	0.0245073408309775	0.026183949118076	0.0403123179502688	0.0428049250495011	-0.00258675269544736	0.0246208336894588
Ptgs2os	M1	yellow	0.093635765437784	0.0134690787426734	-0.0343821292355468	0.0249339725733957	0.0173114109238373	0.00581167154178848	0.00314726145171887	-0.0366970537536873	0.0151742516190278	0.025246438674507	0.0693688460848095
Gm43259	grey	grey	-0.027500746376032	0.0207557818677088	-0.00458621832757482	-0.00233115690701935	0.00723611663031431	-0.0512083826317463	0.0190540786084078	0.0457243131779836	0.0374867030052541	0.0275592981954067	-0.0381309497488726
Actr6	grey	grey	-0.0601483219017372	-0.0752741508119851	-0.0550311197014574	-0.0488674245043685	0.0780988515387335	0.061069627709713	0.0146200098861335	0.0208110566856493	0.0187004543071656	0.0635545704176995	0.0667901603779468
Fabp5	M7	turquoise	-0.169043689482046	-0.0939397966354811	-0.233935811018023	-0.121793649233678	0.0379986676229778	0.209443831803743	0.178162471914453	0.292456362257845	0.111653134936679	0.0852904690844024	0.124300146023488
D430042O09Rik	M9	blue	0.0585766657941921	-0.0545137318141339	-0.0786498514809614	-0.0305751742542994	-0.0171874957528903	0.0707037151055865	0.0578948721037735	0.0219486538200953	0.0182886317370453	0.0840549637509431	0.058913153616904
Grk5	M3	black	-0.0128446205512108	-0.0435004708138359	-0.051587343840538	-0.115114669888017	-0.0205194522324045	0.103953727724019	0.0223529362747622	0.0537693798545528	0.0276040433438812	0.0455486478358856	0.069183038067622
Grap	M8	brown	-0.0333304937703215	-0.0431507003411968	-0.0459296786248872	-0.0430470467463365	0.0756441540559487	0.10290389933244	0.0920065526419996	0.00519188821653758	0.0881137754774717	0.0475153439605928	0.111203716885014
L3mbtl3	M9	blue	-0.0101675811826715	0.0140893285364019	-0.0602319487282328	-0.0127290320613101	-0.0419544036956784	0.0553874879889425	0.0446110914141889	-0.0197535441006658	-0.00885430593566034	0.112830807748493	0.0200261721207276
Itgam	M8	brown	-0.0719959883382201	-0.162156071478491	-0.278771518584076	-0.120912692488553	0.0246872042279704	0.284544553841368	0.255062029987056	0.162416941906716	0.310917337289484	0.24284354709434	0.191397955916035
Hist1h1e	M5	purple	-0.145705178737825	-0.0201564956087755	-0.0911537079255321	-0.0472681127479959	0.103950683441669	0.22583600042412	0.138857792190382	0.0799760836789403	0.117145344268942	0.153714072627101	0.0886516434217509
Nek6	M5	purple	0.0290669514421395	-0.0375701978147997	0.00577050465194196	0.0287019905184903	0.0283853924304951	0.097914813537028	0.0599830311080892	-0.00313016967723206	0.0119396264246797	0.00999942386801671	0.0179950366978604
Pf4	grey	grey	0.0326766494269006	0.024491226838214	0.00973774808753998	-0.00398774171670753	-0.0118084782501413	-0.0399170881889164	-0.0199664819486599	0.0691890145754035	0.00233196916243775	-0.0368954372241894	0.0361814193635269
Gm17055	M10	red	0.0952299224855341	-0.0200944281439878	-0.0414415442068803	-0.0391804587714023	-0.0351299188069046	0.0250414127521511	0.0116593473879966	-0.038854842763482	-0.0274688766664713	0.014008237570368	0.0107948252611109
Dnhd1	M10	red	0.0125679696002576	0.026635938595005	-0.0390980938328635	0.000981329225313724	-0.00539526884605361	0.0137673637757317	0.017589430973218	0.0220594503933798	0.00173829072432304	0.0285363624789235	0.0417014854287201
Akap7	M10	red	0.0567250837669188	0.0301739749093646	-0.0283717768991224	-0.0272423345501674	-0.0268446960393441	0.0247698405178335	0.049305470005638	0.0406770811990714	0.0268358079001888	0.0407702051222668	0.020863389955473
Tab3	M3	black	-0.00122495612088784	9.40801137149934e-05	-0.0433885626933127	-0.0381314342408968	0.0125649068668179	0.0374017955789851	0.0328556936329436	0.0153148133825906	0.0275786600092242	-0.000818963717112272	0.0117747409087046
Nsd2	M9	blue	0.0117618072188686	-0.0340653637644876	-0.0153894214271439	0.0030006328414537	-0.00477265004742847	0.0563709536859463	0.0284782733245528	0.000369576507469066	0.00955751024652814	0.0906619842404313	0.00810659362015369
Cpne8	M10	red	0.027913243930178	-0.0730921611962794	-0.0883295724662921	-0.0433185367376219	0.0264070367380588	0.0661470969652199	0.0480637394531838	0.0299103543677248	0.0332185980447105	0.0632695418007967	0.0726437265981171
Helz	M6	green	-0.0608942192467725	-0.0256137772827726	-0.059843615342243	-0.0247041552886264	0.0539486830346638	0.0850492331629367	0.119735315380837	0.0521883414552109	0.0850320387370284	0.0900224607554343	0.0610621829166913
Stard8	M2	magenta	-0.0022635961000786	-0.0250664189601577	-0.0151067454394574	-0.000296794539805842	-0.00954037020152265	0.00372345349083479	0.00683155466559012	-0.0708617103988989	0.0256809253643104	0.0104786164708778	0.0360013275401355
Schip1	grey	grey	0.0543547213764141	-0.045328930348502	-0.0171030904749529	-0.030191900613692	-0.0316423984896749	-0.00872494261524654	0.0196311643361134	0.0534954795142317	0.0173177765367244	0.0738306987009224	0.028691564271739
Eif1b	M6	green	-0.0963575030019792	-0.0877936891490202	-0.137459235372755	-0.0844836527666751	0.0922451528797983	0.0887301370983801	0.169320669922389	0.0496638502927606	0.0641524173029377	0.192037933041363	0.118853275164877
Cdk5r1	M7	turquoise	-0.0829175017567288	-0.0755915207103262	-0.0822917219239233	-0.0603587533386268	0.050652083745617	0.0504264685748786	0.0998248736139452	0.110225907477653	0.164459164732474	0.0587719656930446	0.131536962601172
Oscp1	grey	grey	0.0263748829803248	-0.00592883181191122	-0.0338432746395011	0.043685104544166	-0.066487445428446	-0.0346092849952038	0.0512349642637737	0.0387628364446483	-0.00161682196858696	0.044686437077011	0.0394986649500362
Alas1	M10	red	-0.0817419848888716	-0.0449021785999177	-0.0716703548716944	-0.081868653847417	0.0562276524101284	0.178140662504995	0.109850431033336	0.0806967254648227	0.11876821756792	0.167792758139122	0.2482116818299
Atrn	M7	turquoise	-0.110893119873599	-0.0725053472986176	-0.0754954968221822	-0.112727364842408	0.00384529605865357	0.109014249242475	0.145498411109072	0.145001960598269	0.107113283958873	0.0807572269491378	0.0869342329624979
Clint1	grey	grey	-0.144178300926193	-0.131403897233972	-0.140615790979661	-0.0548490316620637	0.0631788876579625	0.236690707111688	0.213350888428083	0.0458140748519701	0.126866180622821	0.218943005301562	0.161872598319605
Stap1	M1	yellow	-0.132305090786794	-0.0883810895910759	-0.0888671660371028	-0.0573205174627595	0.10769653523266	0.202167944312018	0.136827183805739	0.0241090474275149	0.132778463362634	0.158459478366468	0.124753880672168
Eef1a1	M6	green	-0.104867087070602	-0.208448141766732	-0.314230287496427	-0.15434021799454	0.0959873942809587	0.260481252253138	0.294792697112339	0.270283698618786	0.193851691305907	0.337186951072369	0.219843348952145
Retn	M7	turquoise	-0.0242743505696645	-0.0529714651636559	0.0122713689475192	-0.0232982699694008	-0.00567253680188797	0.040135094774895	-0.0156108463135791	0.106150227965291	-0.0227559046798617	-0.00547324929265098	-0.0263106332671294
Hspa1b	grey	grey	-0.0174440481902231	-0.0287493568276998	-0.0991414721103028	-0.0126455248121155	0.0493305251756949	0.0472632467386178	0.091938453859387	0.0630858276099975	0.0360378043684276	0.0476428647594672	0.0455590398939058
Map3k8	M1	yellow	0.189622145052842	-0.0853646345284344	-0.081626762905053	-0.0571179404181582	-0.00446395177641733	0.0677878838758806	0.0318888890957266	-0.048073156569516	0.00141937665209077	0.129256221592675	0.121467159385182
Ccng1	grey	grey	-0.00278184913206621	-0.0316290070644184	-0.108756045149636	-0.104001716952109	-0.00432395339121893	0.0482502118586696	0.0673122546481603	0.0696095724970697	0.0645846168552698	0.0464975565623833	0.0412744492378773
Rpl22	M9	blue	-0.062240475325736	-0.0218356855040259	-0.105638937104831	-0.0179207046676935	0.0768388847809252	0.128461700543571	0.140608571510338	0.0136115704500761	0.0687877189409016	0.225854265868629	0.142117277965097
Gde1	grey	grey	-0.149086797493732	-0.05835521443317	-0.0969485196793635	-0.0509750876675207	0.109200187976073	0.209857621346	0.214490954688122	0.0557688272754972	0.136113441530387	0.184205908144404	0.105044203647587
AW011738	M8	brown	0.0921847986373806	-0.0406954970807381	-0.0250109073828691	-0.0242465437984217	0.0309154233915527	-0.0214127561391672	0.0257764842895212	-0.0226809308674138	0.032618680916929	-0.0265766014683739	0.00312883509377322
Rbfa	M10	red	-0.124445764669941	-0.076928039807013	-0.0571473429713315	-0.0248065016003309	0.0461159859754978	0.13443079290121	0.134278465886603	0.0214086061129728	0.0843138399366672	0.149897056144135	0.136926524978962
Tln1	M7	turquoise	-0.217421845953301	-0.166768803447983	-0.201290582774158	-0.147259617924614	0.110526824767715	0.290287569766131	0.270196488597723	0.160034037073467	0.262516633353084	0.267121220805567	0.218133030415974
Satb1	grey	grey	-0.0916713614321146	-0.091469878944275	-0.137106641601424	-0.0812351411091166	0.0905457576196918	0.133247507015979	0.118312971364583	0.0184793873747627	0.107698320293884	0.110657036326584	0.160215776501931
9530068E07Rik	M7	turquoise	-0.2014099673961	-0.155882356875572	-0.166770269233608	-0.165308328786597	0.0654809471358045	0.211106291513012	0.193986180067301	0.113109264441343	0.188122823256615	0.157933218121936	0.151699328834584
Ier3	M1	yellow	0.190066848640979	-0.105523763594772	-0.138247630284104	-0.11313625966408	0.0696787319653058	0.146502510195171	0.115648237783423	0.0834289093781761	0.138045305299186	0.167415382782925	0.106036480064664
Cd200r1	M6	green	-0.107828441101173	-0.0580038816442043	-0.0240574720893368	-0.0269200940849086	0.0365292277348763	0.15459421675089	0.144870179432706	-0.00231919679040521	0.078367812346579	0.116031039609138	0.0848172032519861
Arpc4	M6	green	-0.226225606004877	-0.167704446228471	-0.349920852898031	-0.158391807832049	0.0297373098262659	0.249465203201637	0.255398433582387	0.196823379076762	0.19629517537512	0.282689317948391	0.186540267380758
Atp6v0a2	M5	purple	-0.059490197642883	-0.0614133721850384	-0.0421407852143154	-0.0433255010357697	0.0201717017729769	0.168975994053193	0.0857668141780441	0.0207442667780836	0.040666754874047	0.109512340067646	0.103018059130365
Ube2q2	M7	turquoise	-0.14252773224799	-0.0515223693395779	-0.0770534017463685	-0.0415549533437495	0.0706185064075792	0.149484693922886	0.0859239285539228	0.0287806217987689	0.0643757254268537	0.117061666927669	0.0525031957559562
Tubb2a	M7	turquoise	-0.0919958240915406	-0.0307592789786915	-0.0503860537104952	-0.0344688100890944	0.0284799413870283	0.0718926945148	0.0651651581136822	0.0300650693723029	0.0720155442839708	0.0544861581556576	0.0738142483455514
Ankrd12	grey	grey	-0.0567256504202995	-0.0717940212981409	-0.15299558495612	-0.0843458725400358	0.0557187794298671	0.188613661074726	0.188748063087356	0.0524936774244212	0.127144914096844	0.198120367287809	0.168808491794371
Rpl35a	M9	blue	-0.0599685523897341	-0.147444076091986	-0.297947111834971	-0.139045432990756	0.0135564435550885	0.20262625595809	0.263203639970001	0.168714149387426	0.161115789882459	0.424231203682789	0.207959511382676
Mif	grey	grey	-0.0222865707352326	0.0106997045027931	-0.0265752963577607	0.0178981827643585	-0.0265168668803258	0.058113923595531	-0.00331284723004859	0.0827182626287788	-0.0515277775316569	0.0460432141544506	-0.00531815819747674
Ncam1	M8	brown	-0.0968876629824038	-0.0542317935897022	-0.0544806304072895	-0.0368992478580979	0.0193471818599771	0.118146330828559	0.0699497091508185	-0.000202381563706395	0.118944930430702	0.0824032097827477	0.0673974701195072
Cpsf2	M10	red	-0.0281350769113654	-0.0769536596730323	0.00569931929764565	-0.0402713439079621	0.0349484725719386	0.109235647415435	0.0755348537205468	0.000942808995242189	0.054652871186046	0.0855078404791005	0.0921714657939027
Slc2a3	M7	turquoise	-0.126834090222569	-0.0985824012213309	-0.183254748127489	-0.143734865742111	0.0536163292095866	0.183187379312991	0.175552302518834	0.222171666325778	0.289404801845783	0.072599190824527	0.103493946717601
Irf7	M3	black	-0.0831804279770449	-0.108182607780983	-0.034318872128508	-0.126509565666326	0.0661625285953432	0.128961223402201	0.103219401640489	0.0517270934742824	0.0333986654845696	0.0940852111854212	0.0687697699670762
Dtnbp1	M10	red	-0.0110955027976304	0.0240399976750561	-0.00844692190184571	0.0246266965523466	-0.0118686813474725	0.0321493465727835	-0.0165348479446417	-0.0079257080398464	-0.0187555718371889	0.0225696095382296	0.0567051570078387
Rps26	M9	blue	-0.0669976394634781	-0.091849495144947	-0.16716629935498	-0.103633676315479	0.0645398239398983	0.206975644637721	0.175275246926258	0.0194857211481741	0.138641267155172	0.272217202590937	0.151363066776969
Slc39a7	M1	yellow	-0.0121612572388934	-0.0505646063167537	-0.0391762053607678	-0.0224513571382545	0.058443825657046	0.108937008621558	0.0144040098223107	-0.0120394832908745	0.0359435491348979	0.0441058620179045	0.0595570568256685
Tiparp	M1	yellow	0.073904914016353	-0.0197335518674381	-0.127901472494189	-0.0542709892418781	-0.0417568051951637	0.085339787118908	0.102703699479722	0.0860246657727093	0.117588632116678	0.0965974539852914	0.101197784496104
Anxa11	M7	turquoise	-0.274152891130826	-0.169931221127632	-0.182854811479753	-0.149523166305033	0.115558955904006	0.286391057067695	0.230615761311786	0.181603458049386	0.201458084153057	0.208180483078499	0.210790175005232
Hhex	grey	grey	-0.170593037466465	-0.107168776689101	-0.13385379940894	-0.0798533399558507	0.0339750266188372	0.16078623173336	0.18123874913671	0.111392007698413	0.119408228089824	0.167568044283623	0.145336536094872
Ints6	M1	yellow	0.0892499749188504	-0.00971880002061375	-0.0496158793652763	-0.00902588933174343	0.0355074797185198	0.064786540893484	0.0466315783288457	-0.0546804679620087	0.0363433939252726	0.0449152731414581	0.0201274768218118
Cox7a2	M9	blue	-0.202936957880844	-0.110431184198034	-0.166131550549836	-0.0982921047820549	0.11097055462357	0.243443037686668	0.220390445778516	0.0723553132154676	0.100531381942775	0.271336679379086	0.146735721523729
Mcemp1	M7	turquoise	-0.172966712668708	-0.166478572136257	-0.275265277781347	-0.18204865192371	0.0983582499218116	0.275578154186761	0.236957138606169	0.448909094888904	0.247209584191802	0.176984638340708	0.157059040709473
Psmb6	M1	yellow	-0.114424326520879	-0.0509048383308383	-0.0514641051762484	-0.0333544526363505	0.130724097701247	0.127912518847134	0.133099443727252	-0.019877978484731	0.0588354473052878	0.138178430024633	0.0986662552397193
Rwdd1	grey	grey	-0.0604630182170275	-0.0459102597129057	-0.0496036486224112	-0.0337521047018337	0.0543592604199639	0.0583289134801204	0.0722715896164617	-0.00351636464390994	0.0964927109814775	0.0771670300065654	0.0873660082094474
Batf	M9	blue	0.143216331661383	-0.0259183790127784	-0.181420664999695	-0.032435514454431	-0.00289413477908038	0.110067563598267	0.0697627076034603	0.0269006410034181	-0.0415462485444247	0.155468196278503	0.13801202423298
Nsa2	M9	blue	-0.0955946019461229	-0.0590172941319989	-0.106589898833718	-0.112170548462567	0.0896179246275093	0.138541572507954	0.150777035026061	0.0492617688226545	0.0623067359720456	0.139979486021099	0.101409109787459
A530032D15Rik	M7	turquoise	-0.159761031433351	-0.148485768566791	-0.143488025784229	-0.0672235381880755	0.0518703213336677	0.167274629590525	0.103083976939873	0.113926808958155	0.182349269258838	0.0869101212446795	0.102055437099377
Ndufa4	M9	blue	-0.0914536807004542	-0.0573116758280731	-0.0984108749937895	-0.0426261023976265	0.07574525117546	0.12207203886636	0.140115245544057	0.0274046844545223	0.0913104424804194	0.20252356527621	0.0875132363252645
Rev1	M10	red	0.0400035408898016	-0.0323103936239307	-0.00572780588121952	-0.0520982290751889	-0.0100414322475464	0.0258706487048659	0.0319902015148538	0.00365350055520838	-0.0137736485403383	0.0405871881467943	-0.0164409387173657
Mki67	M10	red	0.0584804593460074	0.0266205193289586	-0.00446015680816717	0.0285270048651694	0.0405403354858264	-0.0281639748451813	0.00104206274710797	-0.0593363096280773	-0.00748232313242413	0.0074089193192245	0.0834683747250119
Tmem39a	M2	magenta	-0.0342471607323257	-0.0374440025145732	-0.0194537475283105	-0.0115641008926078	0.0340332898106549	0.0176344783170177	0.00780599079663718	-0.00869565814452574	-0.0297249127040729	0.0316238040727064	0.0463332085606376
Gnal	M10	red	0.0261900112912181	-0.0190119186234172	-0.052004253557215	-0.0868100246902274	0.0153857937065451	0.080341506181005	0.0374255141908012	-0.0157607937655056	0.0264278938417256	0.0662428716072914	0.0598694182385947
Prkacb	M2	magenta	-0.0148494007168081	-0.0555258238734921	-0.0367911515137161	0.0128929075788949	0.0556859224601675	0.0950527799901271	0.0173066695589252	-0.0144994496850254	0.00728378767853179	0.0453735333534857	0.0406365856060131
Anapc15	grey	grey	-0.0423647160245366	0.0214934268688788	-0.0606637386929021	-0.0262425344218872	-0.0192172246916983	0.0927002564979425	0.106847820238695	0.0424265913439295	0.0432674729171897	0.0847694500933012	0.101463927812998
Scoc	M8	brown	0.00533053166677968	-0.0109315614868714	-0.0218114061872122	-0.0192275485847633	0.0255737130422924	-0.00685777822355487	0.00609440683753525	0.00397555231434208	0.0608089859109434	0.0348756939280849	0.0126252400851878
Btnl2	M10	red	-0.0688447308349496	-0.00193773442363642	-0.0519327566387735	-0.0300526212937044	-0.00661732984483604	0.0659647845720753	0.0104987635223685	0.0109576832397544	0.00299744525074039	0.0205043757328449	0.0666660014537319
Tctn3	M2	magenta	0.0472034784502745	0.0195538327287792	0.045978758832702	0.0545739059678806	-0.0304066439842868	-0.0176694289120253	0.0085670472432136	-0.0200597984258128	0.0167858957880642	-0.03457473878688	-0.0223341116195448
Alyref	M9	blue	0.0217087129293848	-0.0261232701747978	-0.0649532784250562	0.0300793868975032	-0.0215725507328947	0.0632497048917105	0.0430487584814787	-0.0535852715259393	0.0125695664103953	0.0809602721023804	0.0563886417656832
Kdsr	M8	brown	0.0231030287273675	-0.0461994142628976	0.0179941460572581	0.00750442569494656	0.0178985521637293	-0.0260481283880996	0.00752099033233819	-0.0113362915382975	0.0805911181443345	0.00127304496225048	0.0454215124466878
Jade1	M6	green	-0.045627923424085	-0.0515857536612544	-0.0485034801025313	-0.0394834204388741	-0.00435221960668675	-0.000283451114618958	0.0326371300640029	0.0250809077076867	0.00863381045435336	0.0376785488825241	0.0193779879689218
Gimap3	M2	magenta	-0.00715411200085175	-0.0286991946647622	-0.00260057256287244	-0.0149588761559828	0.0772853258783612	0.0269087199170215	-0.00447249157398471	-0.0131214349748269	0.0563220435413058	-0.009186917482231	0.00595685834813533
Tulp4	M6	green	0.0457524790799745	0.0156167562968124	-0.0450814172816622	0.0151553618952879	0.00100202055397085	0.0233813045969881	0.114960565195684	-0.0258133666550033	0.0150493583720994	0.0335688203357672	0.0278267844050067
Msl3	M4	pink	-0.0868440625383797	8.07798934835815e-05	-0.0248727287943575	-0.0133181854278316	0.0669810994308877	0.0777848589897187	0.0670680822080073	-0.00253235271422194	-0.012593181188112	0.0863744882620061	0.0435716448690993
Gm34342	M3	black	-0.0158922635037173	0.044576846149155	-0.024437946063147	-0.0567722280138335	-0.00111796834001125	0.0509547299327254	0.000252852805404235	0.0508531113983154	0.000904204923421371	-0.0209962367864051	0.00754708419794167
Rplp1	M9	blue	-0.0661244910967727	-0.0828376338493431	-0.154508625440021	-0.117136277645211	0.0820245617271959	0.199563287701168	0.187548254539997	0.0414049650765223	0.152969332975409	0.229111411312541	0.177263469873035
Calr	M10	red	0.0305437986907378	-0.0663776455372576	-0.126634488605069	-0.0466173062493266	0.0692270393458182	0.110807439122995	0.0918051116847348	0.0469459980637422	0.0913265053591077	0.131440839610116	0.185859714992372
Lamtor2	M9	blue	-0.153500139032527	-0.05159434856349	-0.130427916850438	-0.0445418485966143	0.084347944119444	0.216244370599379	0.190080782842748	0.0668092793336127	0.0900843452782339	0.264918201192611	0.144724188783125
Erich1	M10	red	0.0166276497702918	-0.0903355978774927	-0.0784090186462281	-0.0429161738143257	0.0219663558220542	0.0931012618599778	0.105224155493563	0.0186041386536099	0.0795904731638956	0.147078627740924	0.153819514394344
Osgin2	grey	grey	-0.0370906252395588	0.0233818717387294	-0.0113425893097461	-0.033987928282404	0.00971519904081534	0.045088856587908	0.0308500040160047	0.0611993857955826	0.0711876483617991	0.0210084692555243	0.0562200334175451
Coro7	M5	purple	-0.112956685588044	-0.103462905266645	-0.0656344057430336	-0.0384773152510625	0.0519084393577408	0.195785508637668	0.105249356528505	0.0289623570123797	0.0601084103266476	0.144318262120225	0.0751489782464756
Gas7	M7	turquoise	-0.169158316268582	-0.101463476103853	-0.0608099972134124	-0.0891586419253369	0.102236939737689	0.171429864801328	0.143828907615731	0.0296773391248743	0.108094522490226	0.15153815329499	0.127713128200418
Irf2bpl	M10	red	0.0848035699721306	0.024645202811714	-0.0384329308516756	0.00105133943661747	-0.0302282405681587	0.00862691626892845	0.034650343816929	0.0099399379308346	0.0118109856014915	0.0523040458078212	0.0736191031609682
Serpinb6a	M2	magenta	-0.119767283023102	-0.094277924069497	0.00421250423228971	0.025440106776702	0.0797378813044849	0.098458985058675	0.0652858142626761	-0.0273894899623039	0.0258531798039399	0.0755411070096686	0.0106365531191264
Rplp2	M9	blue	-0.0682095091835872	-0.115350953179645	-0.176956090599269	-0.115553967310077	0.0754110143535428	0.229325595468042	0.208440796485899	0.0383115785735203	0.119244972900253	0.298713223777138	0.167307983348002
Wac	M1	yellow	0.110195575788747	-0.103487199277072	-0.175858255001539	-0.0592682968962058	0.0476931312441187	0.0845718802960923	0.117779145450242	0.00459115676870086	0.10725673668433	0.15942325380556	0.0887157587446407
Npepps	M7	turquoise	-0.187359176646858	-0.127014160435886	-0.144350262192246	-0.0914843533436697	0.116145189843146	0.253232474669778	0.220355327926871	0.144216632089324	0.227584996086626	0.219591306660445	0.181695128738366
Dgkg	M7	turquoise	-0.0562478784484783	-0.0688525541277512	-0.119913424171092	-0.0466180525053732	0.0415050714588835	0.10308978632634	0.103412445654954	0.118926033565319	0.0510012900196891	0.0581382258525949	0.0625205393282563
Agtrap	M4	pink	-0.122930682097352	-0.0790878341648984	-0.0163079902033575	-0.0461503182230474	0.0757266218483035	0.203100746222837	0.119120386080033	0.0167228186895202	0.0644584037704321	0.124381899769943	0.0992648919549921
Ndufs4	grey	grey	-0.166473755593006	-0.0964476611657256	-0.156725924634118	-0.0924718051904005	0.122995811573605	0.24241772802115	0.181081466326066	0.0717989639029093	0.135050710983334	0.207316932545839	0.144873241370151
Vcl	M1	yellow	-0.148723058183059	-0.11290956217533	-0.0669040694419058	-0.0732408033658581	0.103334973566143	0.219505506915375	0.199421317718007	0.00421216721163643	0.142733515659492	0.177420585585126	0.142549559173304
Nif3l1	M6	green	0.00402819017513949	0.0035030740780501	-0.0230798074692173	-0.00288719011269265	0.0632328273927424	0.0575957957436601	0.0284067623020453	-0.0149633340851182	0.0506462056944603	0.0492087151651165	0.0533926515885254
Ifi209	grey	grey	-0.024355393515927	0.0215713815926137	0.00408563709843358	-0.0515331725052403	0.0172421437232257	0.020385520824623	0.00380067140828067	0.0204916754629266	0.0169004373784282	0.0338310320687136	-0.0156051002682763
Batf3	M4	pink	0.0628387433044249	-0.0207212186010938	0.0148025212681818	0.0287432512794952	0.0554950651848752	0.00659597449893711	-0.030245666499143	-0.0199124710597021	0.0372696500792668	0.0248299327625546	0.0123034847142444
Lrsam1	grey	grey	-0.0233553609644084	-0.0107864096358192	-0.0313221678788618	0.00212010259412259	0.0370751714911882	0.0107106821262135	0.0385116502933087	-0.0150975131563057	0.0694057869837717	0.0417933349747572	0.0450800224867813
Wdsub1	M2	magenta	0.0333780692873622	-0.0366314551127298	0.0048079785820098	-0.00889238396610056	-0.0425153483662231	0.00896499255262479	0.0132506533624639	-0.044624799855928	-0.00166780932110966	0.00799808666008803	-0.0312105538305409
Itpa	M8	brown	-0.0423058835280264	0.00778994095014747	0.0122602587848391	0.0293402035278358	-0.0217735863586595	-0.0203363977042029	0.0114145990574312	-0.00132849736776295	0.03764794212413	-0.0528640554217728	-0.0155782400143822
Ube2c	M7	turquoise	-0.00714847117253361	0.017603888437356	0.0195724371859098	0.0297146794968114	-0.000478499411632522	0.00151079762499958	-0.00189029858605627	-0.00695724187332516	-0.0179859998672069	-0.0219589683440289	0.032517283151518
Zfp639	M7	turquoise	-0.0245124630125004	-0.0383533280885667	-0.0153593634452579	-0.0199935560076067	0.0238046677113374	0.0403387483551344	0.0135633250205874	0.0253250242487631	0.00442441081803963	0.0333362322438436	-0.0148932742157717
Zmym1	M9	blue	-0.0506372289035024	-0.0112461608586137	-0.0115492907242317	-0.0550209150859965	0.0427149251350136	0.0651498206049973	-0.00252264979237698	0.000289248547103871	0.056153926933023	0.0145174661507099	0.00990063794418223
Trip6	M8	brown	0.0122494997584257	0.0301877734671518	0.0115702725065473	-0.0228777903772525	0.0163802092040059	0.0451765150663465	-0.0122479848843344	-0.0086110935201266	-8.10334320556316e-05	-0.0237029406535479	0.00479758086075963
Taf6	M5	purple	-0.0366402325387587	-0.0109776305934297	-0.0375906566793829	-0.0270712209496795	0.0267870742968528	0.0376975008224599	0.0305754799868129	0.0333207008997245	0.0287100906876941	0.0578054514596738	0.0333005648951003
Elmod3	M2	magenta	0.0316884368146404	-0.0087147399001837	-0.0466391181540535	0.0460485056419306	0.0294329185967849	0.0239335892993313	0.00107665313154103	-0.0432101546516333	-0.0125051644251341	-0.00769093237435963	0.0505056830799244
Zfp180	M2	magenta	-0.00409677420336308	-0.0614217390365637	-0.0588339205127127	-0.0592502905943344	-0.016526926396895	-0.00161909383516097	0.0379990291590217	0.0130858634528898	0.0135926905855347	0.0318716782004885	0.058874928724667
Flt3l	M6	green	-0.0437473192346748	-0.0235257652336456	-0.0422577959530266	-0.0461530274559122	0.0528034508058916	0.0266812606273428	0.0285803174017714	0.0133364447666852	0.0494408993327496	0.00583764901750528	0.0162943119128407
Mrpl46	M4	pink	-0.0457413999697224	-0.00336614191250448	-0.0106638339736256	0.0108213342160578	-0.0534246954411321	0.0358735536973118	0.0264588230459595	-0.00153871813231381	-0.0162743061272747	0.0184154042175005	0.0149036081820521
Cdiptos	M9	blue	0.029025345534726	-0.00473119966419913	-0.0278391527753814	0.000680665794858676	-0.0104833762454382	0.0202728085403332	-0.00857542329434566	-0.0073649725972094	-0.0417365278999071	0.0817126713827053	0.0506497698524792
Palld	M10	red	-0.0447532952294784	-0.0418953288657055	-0.00910841305978017	-0.0218969791457369	-0.00975106206465654	0.0954414638129886	0.0581106046890198	0.00203002605753442	0.0476606869479386	0.0809757967360871	0.0860961869869642
Large1	M3	black	0.0105274595611211	-0.0781104023346623	-0.0384744348235698	-0.00154641668545253	0.00144099715339742	-0.0240190971998564	-0.00925159819448987	0.00950934387524581	-0.0157119102468319	-0.0127467832518238	-0.0394701931873927
Wwox	M10	red	-0.00466694541910668	-0.00742355224704585	-0.0374474241485178	0.00430777956231602	0.0502158191697324	0.00562703902061623	0.0381422038530572	-0.0116935888195693	-0.0198523169444797	0.0621911491492339	0.0204097863770123
Mphosph6	M3	black	-0.029153345545201	-0.0413389710050549	-0.0288438087930229	-0.0488040151266457	0.0867329800748719	0.0446079219695087	0.0467713769616301	0.0224917746289343	0.0175483400613103	0.00223948416561653	0.040513834789601
Taf1c	M10	red	0.0457875634735286	-0.0266409830103825	0.00569400515642101	-0.0506369408788656	0.00219160084352599	-0.0160511732605268	0.0144338427488082	0.0331418893363395	0.0125632313385955	0.0340329394103103	-0.00421960362639015
Gm26797	M10	red	-0.0073286184001003	-0.00843656913562032	-0.0605969400211237	-0.0456893712545413	0.0897563413081006	0.0225835040420916	0.0806539714287992	0.00175466949739465	0.00866397852302079	0.0604489267886634	0.0371598826788266
Slc35e4	M9	blue	0.0255858505417118	0.0446265947888576	-0.0740491662484142	0.0100314327853771	-0.0208465516105545	0.0508869687300525	0.0358361284200812	-0.00530234313163831	-0.00473971529728968	0.0613675038608293	0.0316458365289284
Bcl11a	M6	green	-0.00478683319102996	-0.0516791762393869	-0.0164085173082822	-0.0366911090522635	-0.0212628396455728	0.0480769684498829	0.0356530180486463	0.0488835154924285	0.0653681288596483	0.024357727671521	0.044911835110645
Usp36	M3	black	-0.0815418830198771	-0.0361720346815625	-0.0142619182622295	-0.0267735760104319	-0.0148266097845698	0.0858770129301132	0.0648229032117644	0.00106183434744534	0.0289302498538895	0.080526876432428	0.0153213973296569
G2e3	M6	green	-0.0418153859136358	0.00384777718750607	-0.0307653228543481	-0.0699304880789969	0.0267343776820132	-0.00621622374447927	0.0500517189221851	0.0374860373441195	0.0296095473191707	0.0175222654917893	0.0126316916167229
Mthfd1	M3	black	-0.0149801089148915	0.0183623358906436	0.011331493414281	-0.0170917499824602	0.0525777973805936	-0.0174340949870401	0.00410664321250762	-0.0208243101606135	-0.00158245368418649	0.0214266687718343	-0.0118607554354256
Alkbh1	M6	green	-0.0451253755372252	-0.00502771074191196	-0.029409796769983	-0.0561476668616126	0.104940681154801	0.0316737634923397	0.0308380108119969	-0.014346407685622	0.0699096211404334	0.0134307778841239	0.0354278140541681
E2f3	M6	green	-0.0534281687578066	-0.0263150837973462	-0.0812284637557561	-0.0701573052102497	0.037759840716276	0.0493213574884595	0.0428079378799727	0.033733345817128	0.0225145780708795	0.0685600484755203	0.0744631319843132
Foxq1	grey	grey	0.03209305089552	0.00611825715034591	-0.0369839637862074	0.00278756280511171	0.00536234393926048	-0.0218064427339362	-0.0532165387284036	-0.00384007939226192	-0.0245264597763867	-0.0219790642396699	0.0365294280177343
Cwc27	M8	brown	-0.0797458321527633	-0.0145331965303778	0.00500503873929929	-0.0186942148964787	0.103249780139574	0.0859323669638051	0.0759334633044291	-0.00496583216362201	0.0570152071043623	0.065357041625383	0.000659213626119209
Mdp1	grey	grey	0.000692118321266384	-0.0355196028644336	-0.044983838873691	-0.0323020036667048	0.016215151226502	0.0868025198092297	0.0286724011110844	0.0568046311351847	0.0520343809887394	0.0123456459936316	0.00978075469655587
Dexi	M6	green	0.0121812578332675	-0.0383985172445853	-0.0246390535787769	-0.0348214162818396	0.0120553767684159	0.037700608060286	0.0921488460496527	-0.0127002539128181	0.0424468886934314	0.0642936562864817	0.026836723655401
Ube2v2	M10	red	-0.00150192985964643	0.0144839559050141	-0.0485269432380917	-0.0201850505422097	0.0345319802334888	0.0279277402745474	0.0407763454362161	-0.0409906388109077	-0.0178386247538667	0.0799884544936518	-0.0057342650103726
Ccnf	M6	green	0.0675704237487117	0.0171130897420078	-0.0153582069959379	-0.0256593614353178	0.0010697411671103	0.00050797995955316	0.0429039236768678	-0.0235933656353117	0.0463505081452898	0.0383843565182937	0.0352778150042457
Mrps34	M1	yellow	-0.0381384704823525	0.0359743641933252	-0.0378250822574424	0.0114324986565351	-0.00477320134805084	0.0185179808694443	-0.00599035076178159	-0.011185765761998	-0.0238744550432356	0.0442247257265149	0.0108981642103779
Cep192	grey	grey	-0.0366754960628051	-0.0168697255723353	-0.0205687417249622	-0.0435469861267711	0.0406578628277192	0.0575068566613628	0.0337510183253402	0.0539159553669318	0.07997749248747	0.0321890635772574	0.0251502354050882
Ptprcap	M6	green	-0.0372816117758761	-0.0369887744742488	-0.0181698931206322	-0.087566172386888	0.0205976660890525	0.0392861385503033	0.0324221050703566	0.0782290199920262	0.0419627936331233	0.0137677547454828	0.0476003582208982
Fen1	M9	blue	-0.0125518426084073	-0.0128192114472485	-0.0328979826463649	0.0363697130324663	-0.0184906801554719	0.0186453366110901	0.0175828049907615	-0.0204391647044439	0.0159018588362284	0.0528447627179822	0.0237929201628302
Armh3	grey	grey	-0.0520658594602362	-0.0653342364665655	-0.026557420345056	-0.0255600410692613	0.0260150052133773	0.0868798767218271	0.0683894316391888	0.0420567947388765	0.10458693934395	0.0593807237144511	0.0708710703809062
Ftsj1	M2	magenta	0.0113993484493534	-0.0340225467846338	-0.0159253434742234	-0.0126592320890376	-0.0249524057591635	0.0643149070959524	-0.0131949692172951	-0.0204086696891079	0.0244251489395595	0.00437639127453671	0.0435367749164752
Tceal8	M1	yellow	-0.0443998351927041	-0.00145265376885844	-0.0131720008043296	-0.000178575323663225	0.00232574276928947	0.0303253777723933	0.00760150677625153	-0.00995133352040102	0.0130413835793281	0.0248242362072826	0.0179067612854019
Ercc5	M8	brown	0.026932331182267	-0.00303945842800579	0.0368505587738771	0.0158040170083527	-0.0217735863586595	0.0240329844546218	0.0202733213182479	-0.0244669736627587	0.0652459465960159	-0.0471849949884888	-0.021957147432408
Pfkfb2	M7	turquoise	-0.0246845215494761	0.00213868448121529	-0.0221302570293081	0.00974490349109202	-0.0175138568333656	0.0459642243227527	-0.00365446259643716	0.096711250097588	-0.0217194540284455	0.0109311706370489	0.0155302724013376
Plekha3	M10	red	0.0274476964261699	-0.0149807222632474	-0.0105044453843501	-0.0481823297020274	0.0207724107179708	0.0332151196136551	0.0353270084248937	-0.0203527702500814	0.0248392352385001	0.0884532756579707	0.0646393619827462
Ubqln4	M1	yellow	0.00593669455000182	-0.0174741456292334	-0.00456231258761349	-0.00187495872985086	-0.0179279928674064	0.0251619800746101	-0.00716430510859074	0.0178465865522024	0.041138253325068	0.0210204577560305	0.00454552001108695
Rab13	grey	grey	-0.0302111288424084	0.0168664186497392	0.00453309412599089	-0.00230927011975618	0.053184092403953	0.0557279304569081	0.025529208674102	-0.0143662988029121	0.0130504742145442	0.031826553590295	0.0124223480909415
Ciart	M2	magenta	0.018780834655554	-0.0231376804220075	0.0124940760504329	0.0303570983747625	-0.0294731059723758	-0.0292902117244998	-0.00551050425629162	-0.0294675142435857	0.0118879131219652	0.0138342453082612	-0.0318352532806297
Lgals4	M7	turquoise	-0.0768492739950209	-0.00106143796005144	-0.0353575065029567	-0.000933905977003742	0.0507747366343002	0.0182148458096662	0.03544831059139	0.048943519181587	0.0445191862719082	-0.00477746614898602	0.0556435537689817
Stard10	M8	brown	0.0156956385564641	0.0289642465314223	-0.0173186978525843	-0.0319609087423477	0.0221658398909943	0.0450829002358288	0.0370288271106168	-0.00410303492815146	0.0406003104054124	0.0227700636360914	0.00102638864192402
Rrp8	M9	blue	0.0128713441883033	0.00608732667662374	-0.0234846358507985	-0.00826312419588103	-0.00455541068027036	0.0890240076297937	0.0264076039425069	-0.0216099177341055	0.0425661448545669	0.0853448189289542	0.0326242941675942
Cd151	M6	green	-0.0273351029290728	-0.00573587619011405	-0.0720599034159017	-0.0458063846071222	0.0161369284928706	0.0946585889111856	0.0525513526159696	0.0479434427135198	0.0399397136322295	0.0774488944274995	0.0371995006434503
Gm47232	grey	grey	0.0155213594277387	0.00886117790102657	-0.0431797534874001	-0.0277560579233441	0.0477739489348389	-0.00117273552096951	-0.00861328710402135	0.0325334145334926	0.00230900871130557	0.00243930867143907	0.0589189829631922
Cbarp	M3	black	-0.00750635440394695	0.012518154614885	-0.00193905032962357	0.0320985998318398	-0.0119605870024741	-0.0226970236320832	-0.0198008116656425	0.0113868700553491	0.0331195566546211	-0.0518622013735096	-0.0246395982244802
Mis12	M4	pink	-0.0106314377944226	-0.00949671506107031	-0.0505542846121585	-0.0586208160208598	-0.00527112842368542	0.0125075936324906	0.0191668473790546	0.00944534242513108	-0.0392822134834087	-0.00724628308736307	-0.0029230533052532
Coasy	M4	pink	-0.017878615558242	-0.0143259609018066	-0.00478961224082636	0.0197330406961293	0.0654767517473891	0.0274396013430386	-0.00250668302228517	-0.0357205457532238	-0.0340322136029039	0.00715670111134264	0.00991542754417961
Zfp456	M2	magenta	-0.0439165068856115	-0.016390673589571	0.0027694935261233	-0.0433904604309613	0.00414502097445023	0.0274559671096996	-0.00195045387700815	0.0245148194104219	-0.0139960724003197	-0.0236264328165118	0.0119803305822487
Gm15912	M6	green	-0.0488735222875972	0.0031772215705802	0.00399513242682043	-0.0148216709746746	0.0399014933680556	0.0262666576404241	0.0932061910036674	-0.00526021458958145	0.0432009436884548	0.0832189012756147	0.0474094989160251
1700023H06Rik	M7	turquoise	-0.0568095942885153	-0.0397454022577625	-0.0880737433225928	-0.031659830095364	0.0554482962878869	0.0714621280680788	0.0454886015313339	0.0504252006207766	0.0347981246790105	0.0461633298048779	0.0348390021136557
Fdft1	grey	grey	-0.0776204090749827	0.0100366079744131	-0.00667644794446448	0.0132946974191581	0.0832433293622504	0.0659067631479714	0.0662904741752633	-0.0125082503395773	0.00728825893365925	0.0596453996111144	0.0383984389185522
Ints9	M10	red	-0.0333460534577806	-0.0068430314829186	-0.0160412234840694	-0.00621992804496329	0.0574973790691415	0.0611916104754422	0.037126354358141	-0.00213464146874267	0.0571204966202112	0.054105536707211	0.0585171710975659
Gm16576	M8	brown	0.0190375807252262	-0.0275768150819679	-0.0159706450583043	-0.00603986601347472	-0.0604411341037799	-0.0253337671991616	0.0488074563543457	0.042328109257469	0.0423765853695908	0.0316459676949209	0.0281440235073493
Gm20324	M5	purple	-0.067736177685331	-0.0961489193579869	-0.106565440872895	-0.0582286209758967	0.0638534091133425	0.0874638044088007	0.0744759446229031	0.0346645778267628	0.0748802239084117	0.0816329239148379	0.0631477956359031
Pus7l	M2	magenta	0.032511100339712	-0.0617263443747916	-0.00377154631175974	-0.026090151768473	-0.0602246039631574	-0.00763012900793566	-0.0271325547465532	-0.0236928016747173	-0.0315599626327459	0.0260077782799077	0.022994456280987
C330018D20Rik	M10	red	0.0124857017985898	-0.00941738385992651	0.00434321435842079	-0.0130250005114995	0.0227345330521061	0.0271633888446253	0.0369478743156729	-0.015140632887819	0.0263478840540394	0.0690442412798802	0.0595289558552133
Znrd2	M5	purple	-0.0094302096221962	-0.0388007757906105	-0.0587112979319632	-0.081120477170212	0.00482450302938469	0.0396318862950372	-0.00263230577591998	0.0475973082002063	-0.0126918112781954	0.0351646415130846	0.00313331324207317
Mtmr1	M1	yellow	0.0159018899602559	0.0235571531370822	-0.0119485674459582	-0.0147068006186646	-0.00375349041523169	0.0365212520948054	-0.0247752399290931	0.00179382213408759	-0.0276020401989203	0.0178630054524886	0.0189116184659714
Cxcr3	M10	red	0.0708388309024984	0.0362512142828488	-0.0661573201169255	0.00398392696398279	-0.00819680292639686	-0.000522739469321019	-0.0216636861956008	-0.0292067739168244	-0.0484601033188807	0.0645568529994291	0.0730539346289868
Ing5	grey	grey	-0.0889895497028587	-0.0513946326834501	-0.0710345393635147	-0.0501299429814903	0.0435076882778337	0.121104037620729	0.0307490023763842	0.0374619557270854	0.0471188753001003	0.0949063539526172	0.0391925060411631
Lmo2	M1	yellow	-0.0338910438674576	-0.029741862469555	-0.025453740524994	0.0109714709997512	0.0697965622324763	0.0729878831758605	0.0191214307531204	-0.0115355737004135	0.0298934544136623	0.0826843554133265	0.0294952629588306
Mcm3ap	M6	green	-0.0598742254829853	-0.046635544823318	-0.0530223919422367	-0.0189664177609288	-0.0360552662584699	0.112088884778762	0.120722789897222	0.00171361733410076	0.0238912320577436	0.118112596310572	0.0313225995513232
Bysl	M6	green	-0.0618271662411682	-0.0126294711919706	-0.063074537246457	0.00604259710330937	0.0428050433018221	0.0329868409516762	0.0713914461911741	0.0453730540700731	0.0271684363074119	0.044491460868477	0.0493014107713571
Il2rg	M1	yellow	-0.00212692542912105	-0.0833693243209372	-0.0646106284062725	-0.0591932764566526	0.0614772918775825	0.0694649713688805	0.0184560213280305	0.0357318967253892	0.021711428095599	0.0782718481550044	0.0862870965559647
Gm47230	M1	yellow	0.0662327941109245	-0.00163747192628621	0.00229208484852141	-0.014102397757957	0.0320131748318776	0.0126678914823666	3.6244610747141e-05	0.0391782957779163	0.0578705238492299	0.0276805961596176	-0.0186017526615349
Pde2a	M8	brown	-0.174211790067578	-0.0959494383818462	-0.093496013835297	-0.114681664981453	0.0965997124250593	0.217532824627949	0.166746288312878	0.0749890495925461	0.225868598632876	0.143521585741097	0.139530842271439
Ppp2r5a	grey	grey	-0.144702446204482	-0.145235665936768	-0.166752659793863	-0.144348733864034	0.117935392338368	0.251427909061623	0.209146363870337	0.111457351015225	0.190018844278807	0.211434202582415	0.170256379083131
Zc3h18	M9	blue	-0.010406567117402	-0.0451692104604527	-0.0986481786226602	-0.0440640531696366	0.0364209453019548	0.0791198929242008	0.137866421025665	0.03033049485115	0.0604517308267932	0.13754852967991	0.0993688130498741
Sowahc	M1	yellow	0.0325177149012105	-0.0315734706762478	-0.0640790968369837	-0.0321482604201864	0.0220757462410457	0.121941149239807	0.0183564476591398	-0.00244165785286469	0.015015594718164	0.0556315353613518	0.0719181026439371
Arid5b	M1	yellow	0.0188103784913195	-0.0736708115972583	-0.0206200259651332	-0.0278893628369788	0.0509781450359539	0.111684401365451	0.103645843071679	0.0056633792778979	0.0708148593121118	0.100644855805978	0.0506804189258074
Rab28	M7	turquoise	-0.142877208812821	-0.0760439618667606	-0.0805060676140387	-0.0361004249387964	0.0336653527713131	0.139455732294688	0.130352023246044	0.082611468576978	0.112272680821399	0.129917458151973	0.0838667582843523
Ybx1	M9	blue	-0.130180564109203	-0.0749268134809192	-0.109453475259282	-0.0743470657753309	0.0844473936468772	0.204712312922831	0.170254004949637	0.0701738614042876	0.130740416764128	0.219211040722074	0.138819535276577
Scimp	M9	blue	0.167910029295163	-0.00714753848059639	-0.0731866813676037	-0.0100225490447269	0.0136189735261375	0.0180291051449977	0.0792469666792665	-0.145607759962729	-0.0967622381189272	0.251313210480441	0.149065241515649
Sp100	M8	brown	-0.170069494618379	-0.141451412634495	-0.117569637666747	-0.0637402792703744	0.0510476808154185	0.220996690831708	0.186780820711244	0.0866742894951886	0.192327373228927	0.156639898907832	0.146230035638656
Ostf1	grey	grey	-0.0268109208120933	-0.143116199515138	-0.328243625231045	-0.183218339188722	0.120716458730922	0.229640193540559	0.111499436515195	0.3715591093995	0.172539697694209	0.195218311794318	0.186121986728417
Swi5	grey	grey	-0.0967540956847115	-0.00683760824405519	-0.130493187233446	-0.0175156590371149	0.0301066126717092	0.119353119455448	0.163242193748162	0.0199245311222166	0.0871025160959924	0.143201746125503	0.0560702335605879
Galnt6	M9	blue	0.0812984068106495	0.00122210595706697	-0.0673443577315682	0.0132661230626118	-0.0377988307778779	0.0885351106790298	0.0624840107474554	0.0285827579324241	0.00343057390235239	0.0816215508260092	-0.0100050775327806
Pde7b	grey	grey	0.106815261568022	-0.0757930849288172	-0.129172780580929	-0.101565348197605	0.0156177246404289	0.0246030886904153	0.0736080452332309	0.00705475975071885	0.0527320896783031	0.0894722917846266	0.0345936856135131
Pla2g4a	M6	green	-0.0688296613271256	-0.0810706026421767	-0.0479169400922287	-0.00834158564472634	0.0277603041564076	0.0869165674910421	0.0832301027220523	0.0247576290425329	0.0767842039460311	0.036941684903948	0.0375838658874249
Mcm4	M9	blue	0.00120818180410651	0.000186011105497913	-0.0342769875046255	-0.0245941359278753	0.00542811392723599	0.0153298745902674	0.015698026862981	-0.00960773415642826	-0.00114935366066689	0.0856982644399578	0.0236405468936666
Gabpb2	M1	yellow	0.00315507172250949	0.00571897288772029	-0.022309893752918	-0.019559555178239	-0.0355676490631974	0.0429885975756803	0.00803336983563311	0.0126557598963309	0.0541837409984662	0.0358997183904852	0.0207236584119023
Gm35082	M8	brown	0.0262913496204071	-0.00943116750544391	-0.0133571315330243	-0.00866736062146854	-0.0345407288493467	0.010587386595919	0.0161132687029401	0.01329113368489	0.0707402106700879	0.0279393828220012	-0.0305139504240465
mt-Atp8	M2	magenta	0.0935634327073833	-0.0768982536976706	-0.0288196522566518	-0.012562953099898	-0.00629028499129995	0.0483464275681298	0.163035692014315	0.0111297853361217	0.0611466037520729	0.0335541307839042	0.0386673845688861
Rps3	M9	blue	-0.0374868268554451	-0.147270907820759	-0.266391970826225	-0.160831733976691	0.046424545743199	0.241841870256747	0.309937224938468	0.0846222806779	0.139876546584307	0.48140722350619	0.256953952731095
Pycard	M7	turquoise	-0.222005578435582	-0.0741942220675676	-0.0910750863167862	-0.0313060518386272	0.105723254510271	0.202317663748257	0.144566082801549	0.0572601882197731	0.129044912060608	0.18076238605445	0.11377133119465
Rnf4	M1	yellow	0.0320489318253517	-0.0470402085617136	-0.060344206552313	-0.0299392753058228	0.053232684894389	0.0757816229697471	0.0295804681574877	0.0210277387721937	0.0611183588400253	0.0626830981583234	0.0686275511294553
Rnps1	M9	blue	0.0217215137221582	0.0419149795425524	-0.0246099982116562	0.0145546181958813	0.0124059212669846	0.0504007387882441	0.0458226504753373	0.000510971385401096	-0.0192478029249612	0.111572594246728	0.0390173219431666
Ndufa11	M9	blue	-0.149908181159702	-0.0425038436844476	-0.0856261160842037	-0.08060624065706	0.0791688181287965	0.199487825516157	0.165596879836239	0.0585686525956899	0.115266204336377	0.172686021937285	0.131006190510659
Churc1	M7	turquoise	-0.159388245853241	-0.0958375686474148	-0.084327788404551	-0.0807867467463912	0.108151486243928	0.164898563190858	0.147854372783892	0.0705679727033646	0.127308967799913	0.145786141185835	0.117677371809217
Myo5a	M9	blue	-0.146724234452841	-0.0858447198596011	-0.0604324896012537	-0.0658635031909489	0.0946606836950504	0.192682763071983	0.162773159125989	0.0317042293535355	0.117484256852581	0.198588887787826	0.120082986152106
Clec4a3	M9	blue	0.144509900402966	-0.0379434174249218	-0.0992957608792263	0.0156027914727693	0.000585748663351513	0.0430353817135124	0.0441018848584253	-0.0504755958625465	0.000332587450925048	0.157905988646313	0.0230767135946151
Sec63	grey	grey	-0.0241485467301659	-0.0205789470824985	-0.0821625968634453	-0.0721557546191383	-0.00433833394631323	0.116612845476082	0.0564937347025011	0.0473506459444984	0.0625079063339136	0.109073933246075	0.0550731795863607
Cdk2ap1	M8	brown	-0.068846726654485	-0.0404089573105914	-0.0410093864472203	-0.0450799219200489	0.0826700004866341	0.0475485095915285	0.0271774901764939	0.0560717438241781	0.0636428242598645	0.0534377780809331	0.00516486489098173
Zc3h13	M9	blue	0.0467840044661414	-0.0287871557122901	-0.0787968072373487	-0.0615403995395206	-0.00384490106949402	0.0715128323660643	0.0480221665133804	-0.00316448464520448	0.0404293328244207	0.148769351912362	0.124483886008504
Slfn2	M9	blue	0.00139971954747679	-0.0880626215088242	-0.214927250551364	-0.12099318656406	0.0365024622580504	0.309749128490793	0.193285742165979	0.171446665838005	0.096110787257681	0.242709817218637	0.211332739880788
Srp72	M6	green	-0.0327656539726576	-0.0541276024428279	-0.0747593537547043	-0.0345089752373467	0.0840501164356845	0.137967615629544	0.14227511131617	0.0424027618867956	0.0873314598688396	0.156226671917506	0.0833451170423264
Rdh12	M7	turquoise	-0.104361176357814	-0.102098213097216	-0.105973509396882	-0.0963993550580875	0.0675989478318172	0.136023796895001	0.148029808963587	0.0751800364799937	0.142337155767128	0.087898630329877	0.109783620981045
Ccdc180	M7	turquoise	-0.0853513036287762	-0.0770134647755569	-0.109370051287543	-0.0527954606241997	0.049572824032499	0.112199286817278	0.107822493079615	0.0832075251629562	0.117845492015701	0.0411654496202193	0.0713127742626333
Abracl	M9	blue	-0.194106603223582	-0.101838399750926	-0.161035124148466	-0.139160565052805	0.151319430441391	0.268444088339907	0.231019301758498	0.0590581088948649	0.155714162821379	0.269648435845656	0.195452425197405
Orai2	M8	brown	-0.0421222600625715	-0.0612398477916018	-0.0628014086052186	-0.0635156816383493	0.0185557306795126	0.139550940123572	0.0786887056009103	0.0552977110860968	0.0951614056003077	0.0884266114610976	0.0956912448279664
Actb	M7	turquoise	-0.134128574308898	-0.133463087256293	-0.39257532953884	-0.215435953275458	0.0867119568730398	0.314371540887668	0.192805687603787	0.579469414331359	0.233303622105189	0.169964882783946	0.128412991623349
Rnd1	M5	purple	0.0156193695310307	-0.0537554790060034	-0.157381234211594	-0.086790175461765	0.0418830226841745	0.265248420664072	0.0571917843421958	0.168316173856141	0.027631011468093	0.127860456388332	0.0753638719907274
Rap2a	M8	brown	-0.0861241011682562	-0.0702582224386302	-0.0766239231903407	-0.056818430104887	0.0735592375529487	0.082963411222054	0.070547659803048	0.0620637069698319	0.122236142847759	-0.0021698856751578	0.0266523073805014
Ddx60	M7	turquoise	-0.080144393455141	-0.0138274477237178	-0.0976809888525602	-0.094153116388417	0.056750007283998	0.0681940881540259	0.0191659140385955	0.171320770055825	0.0269847959808144	0.0490511856899283	0.0188044520094497
Golgb1	M5	purple	-0.0316489957916338	-0.0155796677006993	-0.0516908854225724	-0.0654620267570864	-0.0290580832146504	0.216441755687317	0.0458050358871064	0.077857795965119	-0.0235295623242054	0.077860748247724	0.00322333051843214
9830107B12Rik	M7	turquoise	-0.211214236376458	-0.148493172804326	-0.132534823302188	-0.0858752861841433	0.0138371371590877	0.14036438101556	0.175026590803327	0.184382901394484	0.199302609623103	0.13228928485287	0.0793760474640378
Sap18	M8	brown	-0.00473567494687411	-0.0222696777255834	-0.0426001541747595	0.0052703131753297	0.0564268157613177	0.0306657320892589	0.0406708582595158	0.0369649513527258	0.115444256411251	0.0737879932238371	0.0193498972970762
Snapc1	grey	grey	0.00208699236334656	-0.0514885548936698	-0.0945801787388832	-0.0613947820849486	0.0350523110268187	0.0712968254804259	0.0448527576278964	0.0642550883546128	0.0530506626003574	0.044745577155747	0.0392603261904809
Bcl7b	grey	grey	-0.063658738853144	-0.0463816846618159	-0.0845580708041254	-0.00830773927811243	0.0448464319110597	0.0862975769188966	0.0907832429186425	0.018092827644546	0.0449232131737858	0.0981099424159335	0.0627526779610225
Hipk2	M9	blue	-0.0283440795182527	-0.034600329014848	-0.0731470204851797	-0.0112644881641634	0.0283777410761198	0.11490526288283	0.101352412204114	0.00659397230395881	0.0164790425829804	0.14786867424317	0.0630037226023597
Vps13c	M2	magenta	-0.0534086160923809	-0.155094530455177	-0.0745542604243407	-0.06759253130443	-0.0150431054480746	0.0789493678231969	0.077187790604788	0.0712233579384968	0.0944795862874235	0.0837658988456013	0.0562833800406252
Ndufc1	grey	grey	-0.141499070501947	-0.0762896930031072	-0.0862157675581645	-0.0434545256706132	0.0810234249142784	0.139842013443035	0.10131204805984	0.0106906054784883	0.0522815969310803	0.135935279075784	0.0875055051955853
Smdt1	M7	turquoise	-0.160729887091327	-0.0824038350379324	-0.158351823053282	-0.138509922855204	0.0857012271851608	0.22708602783326	0.18673889597281	0.122839331675262	0.129598317523909	0.212880632932298	0.153898575374274
C1rl	M7	turquoise	-0.0963335240173359	-0.0640690923108969	-0.0690364521732545	-0.0746141555264312	0.0656794526949395	0.121166215295548	0.109640144021116	0.051511760375181	0.0733181581223385	0.116443068581288	0.100703463512279
Synj2bp	grey	grey	-0.0501013897802765	-0.0596174046421365	-0.0973285896984567	-0.059600466337936	-0.000305745931274078	0.0927733196782922	0.0871449542989434	0.0331073080588368	0.0375822822325981	0.0951460921283804	0.0721876816404811
Atxn2	grey	grey	0.0080784484491202	-0.0379899192207485	-0.00976254715755198	0.00822832758493957	0.0115072012932299	0.0273530588652418	0.0620571006038375	-0.00618593435952891	0.0562837508626346	0.0618440109147972	0.0800871714158565
Vsir	M7	turquoise	-0.232183190992932	-0.189978107579298	-0.169055988822233	-0.13971037486418	0.127563651113598	0.315356608101544	0.234327254849337	0.182304100342558	0.229826344751161	0.224995647938661	0.18814219356201
Zfp36l1	M9	blue	0.0455659920314953	-0.00664849125667605	-0.166082258669203	-0.0429471708423334	0.00826173418429036	0.0716289051310159	0.10737841323695	0.0936189771756363	0.0844477934648967	0.194510843236364	0.132048843387554
Nsrp1	M10	red	-0.026860023636283	-0.0106559446956512	-0.0601579300837074	-0.0613206263199435	0.0382121325390839	0.081418632436889	0.065542978347633	0.0148229102115123	0.0288441923770679	0.0903157281266905	0.0853665069070497
Tmbim1	grey	grey	-0.00478049635525306	9.01109823270789e-05	0.0211636812044798	-0.0334552459368203	-0.0233695731875533	0.0248823884435285	0.022593551246205	0.0678894045769206	-0.00637163454922623	0.00121916717414025	-0.00634727806486894
Mphosph8	M9	blue	0.030945717901073	-0.0007587158600498	-0.0730645553076042	0.0113198809520676	-0.0151070763823633	-0.00433962853056502	0.0802400145406148	-0.0203985034758057	-0.0391511469659242	0.0956351468717648	-0.0093040038762913
Gm50255	grey	grey	-0.0185559684331234	0.0220946749857284	-0.012742460924367	-0.0100187752108714	0.0116935412984644	0.0789539526909579	-0.00352016887751965	0.0279066854235522	0.0167001682519664	0.0366904078764254	0.0683686186408242
Sag	M2	magenta	0.0498165677351865	-0.0581180103833222	-0.0316435234805931	0.0461709532583896	-0.00227824575389444	-0.0466389343167655	-0.0170544786817943	-0.0353858506185223	-0.00749678814500802	-0.0313192311473001	-0.0410559836187306
Psmg4	grey	grey	-0.0616565195550284	-0.0410673783042588	-0.0721757639813638	-0.0298174869708723	-0.0112313004782148	0.107488056708516	0.100720073420212	0.0313648535389341	0.0628403592809888	0.0718301874978539	0.0889480354512011
Hmgcs1	M9	blue	-0.0382628679951636	-0.0525931793356487	0.0149831150323728	0.0120991562284722	0.0184608957231865	0.0507702333581691	0.0617220139400796	-0.0201730115469054	0.0435039696382387	0.10360089831853	0.041275721324953
Dpy30	grey	grey	-0.0655146163146095	-0.0359533106124069	-0.0515973004141043	-0.0111006682633863	0.00757325460060973	0.0927154526115478	0.0323724701296701	0.016116975036025	0.033588456684154	0.0507931135156599	0.0222936878533156
Stfa1	M7	turquoise	-0.0760803259589677	-0.0103098039859822	-0.0160802362681323	-0.00774250229294964	-0.0209149149494392	0.058950745994651	0.0768595436046723	0.0850211693084341	0.0208910496982974	0.0219355471350365	0.0181467787782198
Klf5	M9	blue	-0.120124235121294	-0.0656944075090613	-0.108907995789783	0.0163749121740741	0.108070750598016	0.181776954349892	0.121550332850638	0.050726741893901	0.111874368626369	0.199124430629531	0.0965921891865704
Ndufv2	grey	grey	-0.0987403213764308	-0.030372890764263	-0.0829774553889086	-0.0260428452545033	0.0671587860560778	0.112781266603162	0.0809833295407577	0.00040409003465347	0.0619119844446891	0.106374608052389	0.0464592735614514
Nfkbie	M1	yellow	0.181122688873809	-0.0854151736944157	-0.101730755200345	-0.0247796073507999	0.0234637388569607	0.00411483337671916	0.0614002142452103	0.0764510300071657	0.101883963235083	0.0263202616246212	0.102910018970943
Mafg	M8	brown	-0.173169131233581	-0.0490348134924889	-0.0420023957626049	-0.0809001903371665	0.0601906534941357	0.176599510432585	0.120138989847732	0.0397993535083836	0.184709156760479	0.120033179131397	0.109820051776696
Klhl9	M1	yellow	0.00413255177708511	-0.119300693237288	-0.0830865512902783	-0.0693441811875989	0.0297612132508717	0.0564759003233941	0.100321943104968	0.0365458930788698	0.049530109475337	0.104439185211818	0.119884825767896
Lmo4	M7	turquoise	-0.213703891733179	-0.109295824939657	-0.168679974422509	-0.124158274797996	0.0417219674282969	0.25330572721521	0.191217215232386	0.208929609326067	0.18566948537496	0.18069315825335	0.13740707448159
Sertad3	M5	purple	-0.0770146644254917	-0.0697238955451067	-0.0513769173162463	-0.0588472817697917	-0.0306195365492444	0.222992908980529	0.0535950469266435	0.0581726859963288	0.0535964403797292	0.0857416925214938	0.0778303040568324
Eif1ax	M4	pink	-0.0836541491710858	-0.0932381823344025	-0.0476594743891729	-0.0131221050180885	0.197668951547351	0.117969724846252	0.0702204269207652	0.00406178777698293	0.0406716396200038	0.0979547094373674	0.0407998908549004
Tma7	grey	grey	-0.198565612770796	-0.106823703281064	-0.170886280992099	-0.0928801257276464	0.105039239158446	0.244349344397946	0.180080446759961	0.106952050811936	0.0844362943577487	0.217414449244373	0.101227975527913
Panct2	M8	brown	-0.0629574073069262	-0.0186517431712298	-0.00985043631082824	-0.00439581103278521	0.0277716113715653	0.0659321209399529	0.0564873409337068	-0.012894706336036	-0.00478652834842423	0.0764891887579992	0.0460801126881519
Stom	M3	black	-0.11893426101378	-0.0966150575056968	-0.00463443718819689	-0.0481646359534481	-0.0219528587124172	0.096205508568579	0.0925885226256668	0.0185347983344381	0.0139439615701773	0.0937827629540652	0.0731697627089836
Dtx2	M5	purple	-0.0203493424651606	-0.0601081007878015	0.0095717435292541	-0.0180017282454718	-0.00914237046814046	0.122238022304631	0.0935836707069921	0.0229256584179908	0.0195541930555563	0.0862596587938378	-0.0125793924622279
Ctdspl	M9	blue	-0.0658661871555818	-0.0706053586813478	-0.049960162242742	-0.0666178915569731	-0.0281626918493587	0.0955319807641627	0.0678390295508364	0.00910400570685008	0.0689475102460094	0.107206801983041	0.0541618319252595
Slc29a3	M3	black	-0.0216556766831592	-0.093491924846591	-0.0576787849667981	-0.0252566720178153	0.0107396318253432	0.0609113519746893	0.045446406387703	0.0566683676070069	0.0296615282964144	0.0443909685989817	0.00138659623228673
Nol12	M6	green	-0.069342517310528	-0.00631374262486763	0.00166479221471827	-0.00289194100344984	0.0470452997609101	0.0760552104609274	0.0228505565698929	0.0246302740285868	0.0532951975546659	-0.002188486933026	0.00978279437057319
Ppih	M3	black	-0.073877378072918	-0.0682305649942841	-0.0261137713859354	-0.0732832838229557	-0.0061204380546257	0.063630688421818	0.0432772425994602	-0.00303666034496251	0.0286078300426624	0.0390047813171627	0.0591905016912756
Rbm28	grey	grey	-0.00257895460936155	0.0115537934655709	-0.0219261422246025	0.0404690322665134	0.0463020883463479	0.0334365883181387	0.00431371138151735	0.00219992543047356	-0.0021868313162936	-0.00089833304298945	-0.0265304910056159
Pvr	M6	green	0.0307318818530885	0.00422640086627592	-0.0733213326220204	-0.0258872481440586	-0.00982614917779525	0.0229611275277276	0.0520110508868523	0.0369337862446669	0.00112811646275025	0.071316822872668	0.0413957761407025
Map2k7	grey	grey	-0.067524963033453	-0.0644607429014865	-0.0581713974335986	-0.0187324033901432	-0.00562760236493257	0.0764955758300837	0.0433938887107582	-0.0193860625921672	0.0162504823569072	0.0483037145010313	0.0443295714842026
Prps1l1	M3	black	-0.060632328718729	-0.0801058633198294	-0.0923171803823982	-0.0132477327476611	0.0298166219820193	0.0280101747746972	0.0232875970114012	0.0637313629446826	0.0258330619415683	0.0383263486310982	-0.000437578946348144
Ttll1	grey	grey	0.00253903161221369	-0.103694975476215	-0.108834670030572	-0.0759104039181617	-0.00212673383060467	0.0422166470516818	0.0914696782863513	0.0382089059220295	0.0839459194452235	0.0575738451842956	0.0423178261516254
Borcs7	grey	grey	-0.0508263444065602	-0.0176446064953955	-0.0312595246294228	-0.0462165564100231	-0.0712844654217484	0.0343483725472682	0.0102379831115868	0.0568428257980318	-0.0384262186918128	0.0342420235964662	-0.00765645738030133
Map1b	M6	green	-0.00101858549468647	-0.0267606175185754	-0.0364005739728033	0.0157112492364508	-0.0104902029700697	1.3060121731543e-05	0.0659714617471643	0.0626536822055745	0.0849764441676525	0.081794978998044	-0.0385181255326931
Mat2a	M1	yellow	0.0472339640644952	-0.0298076325170355	-0.100625340766661	-0.0730947790227193	0.0755209541203467	0.102907900264734	0.11403123994716	0.0184422780740179	0.0718378586289816	0.164918837977282	0.105071969745523
Cmah	M7	turquoise	-0.206102503013668	-0.154258254221049	-0.123946898133909	-0.17138898771142	0.0796508070989897	0.232792949978458	0.190364462120745	0.117493312701235	0.156594404308239	0.197223418131786	0.163667523650372
Snhg15	M10	red	0.0668235722883389	-0.0432452136629704	-0.0876541528674494	0.0356365831990854	0.0209407167984943	0.0640469525213453	0.0438096959688005	-0.0245016713144204	0.00538736379125206	0.119801192333701	0.123831312533524
Smpd1	M8	brown	-0.0496614928804931	-0.0385974330854334	-0.0189235744429526	-0.000300579900636828	0.0481249393645078	0.0566229847640537	0.0391319767973927	0.0410044763299356	0.0623701174541215	0.0418748008943542	0.0454919679867399
Ankrd9	grey	grey	-0.0632143008570607	-0.0364433210832633	-0.047751800122308	-0.0246478430315602	0.0801537164964236	0.125178233005167	0.0563656711960049	0.00989028671399965	0.0292012047815047	0.0881316093317595	0.00896625575533306
Btaf1	M6	green	0.0308635391006349	-0.0502528306732332	-0.0988487354038556	-0.0606859596188981	0.0380921777987678	0.0177165741100402	0.0646700060763902	-0.00245980920188405	0.0227520166921222	0.0743904952253482	0.00917246138468641
Mcu	M4	pink	-0.130138579340485	-0.101123829932035	-0.0616788928129596	-0.0442830710042803	0.105643419999521	0.101870182446668	0.0891055756714971	0.00392775990117308	0.111180129927703	0.0657803056607389	0.0750555050057219
Slc27a4	M7	turquoise	-0.218690141774821	-0.0862424038245644	-0.098474096507535	-0.0780008012067268	0.0509886482375882	0.177419676804747	0.155539807419866	0.0895142684533584	0.118903421844598	0.129684299112582	0.138447398476261
Rpl11	M9	blue	-0.0944011867777732	-0.084571765398794	-0.156414484114102	-0.0643275641376534	0.0861315510813197	0.219818811041515	0.160340958394543	0.0742389559673797	0.105446060233575	0.28879910374559	0.13747191870317
Rnf19a	M6	green	-0.0027337134845727	-0.0308364751281432	-0.125046556020685	-0.0240270310934584	0.0285737506316758	0.0875932497522271	0.130886090049054	0.110540151729178	0.0693198693595667	0.0950352419335871	0.0938317753215136
Ccnjl	grey	grey	0.0718644120947716	-0.0133790993267251	-0.0530451717597311	0.0217441780285506	0.00609179391515811	0.0311197467260523	0.0293044937089708	0.0599717768504998	0.0296002829512195	0.0743090214791247	0.0763779950735304
Tbl1x	M8	brown	-0.10992735963788	-0.0464134699412796	-0.0816363593178766	-0.0225701570480927	0.02254151448326	0.0793543403107531	0.108102422768303	0.0289200328499863	0.103962200006649	0.0822635618318007	0.0898607776777927
Nol7	M9	blue	-0.0364446593204745	-0.0632114270486028	-0.0430771094236465	-0.0407460256144911	0.0778582453429008	0.118945593443815	0.0933378408190949	0.0498008645213625	0.0966213100514436	0.143490384629498	0.0659882120094651
Eif5a	M9	blue	-0.168400814391792	-0.130500958985627	-0.236584646400357	-0.1587584020176	0.0737791886349764	0.279491015571327	0.245864650218033	0.224076655346127	0.150209550769544	0.311276903329571	0.21450547284138
Hsd17b10	grey	grey	-0.139494612059609	-0.112243966099059	-0.100282982479612	-0.0798438768908553	0.116104827106803	0.158290512449635	0.155295966282515	0.0356598432362045	0.0656568871203678	0.185115204724492	0.119865914468273
Cwf19l2	M10	red	-0.0239129425537945	-0.0896379470275474	-0.0897110127155698	-0.046802427817258	0.0370148548298044	0.110804057841184	0.110910623283368	0.057106262604724	0.0915065144398875	0.114628091199751	0.118918940784124
Eif4e	M1	yellow	0.170799887630791	0.00146918215554323	-0.0468807969370668	0.0220107484105857	0.025703327357301	-0.0393868513293913	0.0664711089241775	-0.0146839292794981	0.0607008924328327	0.0650011658861391	0.022852355179799
Rps12	grey	grey	-0.0971401879117827	-0.1812972823786	-0.308133817805459	-0.201322375587761	0.0925552863687954	0.262820796189458	0.267615020219749	0.254887667147076	0.217347825184346	0.265482412273694	0.123876985530983
Arl2bp	M2	magenta	-0.212087972232932	-0.267382858459126	-0.108063672165436	-0.084628306607672	0.0674020794008927	0.234109232727426	0.185967734673535	0.0503577810775806	0.179086375492645	0.161371485556862	0.138367106349433
Ell2	M8	brown	0.13542594476098	0.00482991362214053	-0.0260156050879821	0.04143437074368	-0.0131960049933706	-0.0589472609342178	0.0503546092062512	0.0449306257162292	0.192548821716025	-0.0106561434476107	0.0222629925795174
Larp4b	grey	grey	-0.112628148122716	-0.043127606455253	-0.1176464468765	-0.0742744868468427	0.090927350330572	0.205054555434141	0.118826185687067	-0.00448879131407092	0.125410316437341	0.151149290264028	0.177169488645444
Zhx1	M6	green	-0.0155070650860696	-0.0499641199106987	-0.0372304238967151	0.0094659117379668	-0.0162538810973436	0.0764624809626102	0.0727878458277014	0.0461610223905754	0.0187850373390203	0.0910423689895874	0.0469520694739331
Dlg1	M10	red	-0.0136068612652962	-0.0364679325558556	-0.0593980767584996	-0.0688903659029539	0.00867950796944554	0.12157455474169	0.0413816956009133	0.0334571820776296	0.0859502789392116	0.0853711926136369	0.116132464120544
Tiam2	M7	turquoise	-0.0925796312560452	-0.0844938848464605	-0.0406697004216672	-0.0548092573891266	0.0793132703264283	0.124951181725066	0.0975968543059271	0.035586585169312	0.0755719526568279	0.139498973982	0.139126608637013
Gm42701	M9	blue	0.0335124825131606	0.0051038326998543	-0.0263061921210658	-0.0326367080541418	0.0196842941857379	0.00634003889185083	0.0202585124709469	0.00300485542161197	-0.0176614479511618	0.097870092285661	0.040281904340301
Fbxo33	M3	black	-0.0771877533953322	-0.0376611758671124	-0.0569331955035976	-0.194054331930169	0.0614554980422536	0.106186574145025	0.121168283111889	0.0405556833108558	0.0904095311011818	0.0928231417626986	0.0414769093206928
Ywhae	M9	blue	-0.115543263678765	-0.0646179561329621	-0.137888266530118	-0.0439242396367029	0.0210842597668672	0.202551844025762	0.1694036765919	0.0396346945507129	0.0965713915024279	0.244327101039145	0.11900675428812
Ssr1	M1	yellow	-0.101795284857344	-0.101057307790371	-0.0628392758435205	0.00615472463360738	0.0341979033365199	0.136079326337293	0.129478852347856	0.013705460215807	0.0330386754624004	0.145004199841845	0.0663675773960625
Entpd3	M9	blue	0.129432350958585	-0.0249586892274811	-0.064940453654381	-0.039398930542379	0.0660741223755613	0.0736322154314781	0.0484327315560589	-0.095661283115433	0.00343139885885431	0.188490641250139	0.0899066657561283
Arfgef1	M1	yellow	-0.0868211616045789	-0.083812742153303	-0.0811542911894468	-0.0634143184835405	0.0611326417561181	0.159881465905458	0.127913825129965	-0.00365784168797962	0.0684412138516192	0.194170881315023	0.103773385574197
Ndufb3	grey	grey	-0.120744724460518	-0.078441651421007	-0.0950507866373878	-0.0443825802500174	0.0981903014512923	0.131005096952229	0.127414028539152	0.0417392437054025	0.0389124567982062	0.182664676507791	0.0989836885942169
Atp5j	M9	blue	-0.16098633034985	-0.138176234850471	-0.174266634520273	-0.0849867047507291	0.0849511626474905	0.252952414792937	0.223932751317835	0.0951243189098546	0.136553737382495	0.255050784174403	0.155948670592151
Nlrp3	M1	yellow	0.460681707469281	-0.00640570821850195	-0.0569246372612759	-0.0088149201927022	-0.0111337565091399	-0.0737461616965499	0.0141724910927032	0.0117793120985357	0.113500190593262	0.00177074036252619	0.0355526733092595
Rpl36	M9	blue	-0.104333823977753	-0.0467298356368142	-0.107931527073139	-0.0581215885990037	0.12260379451808	0.180018941485233	0.195940024690739	0.0116827654638809	0.0985473357017209	0.274863451866411	0.14780109635835
Rpe	M6	green	-0.151686159472554	-0.0537111831608515	-0.0474177686801022	-0.0536342280142265	0.138435487742583	0.171903709525166	0.108705167043173	0.0121428750600637	0.0640620495755858	0.152274439081365	0.0936194105748918
Wdr1	M7	turquoise	-0.24213834196096	-0.130851247086807	-0.1206787458262	-0.15165143676333	0.101201387556055	0.282342742697961	0.190315887234193	0.106712374531278	0.169310145068326	0.190862669143177	0.184668028697688
Tomm5	grey	grey	-0.108922211130853	-0.0344504979635241	-0.0592422367099836	-0.0175919783355698	0.00224907139127198	0.136271058637679	0.0948030563227134	-0.000950651434008748	0.0779131607998319	0.114015258544199	0.0776954691927816
4930519G04Rik	grey	grey	0.0192868797996402	-0.0255605473033296	-0.0388254198906997	0.0519910666383783	-0.0439715572293005	0.0322087131519072	-0.00223547751037202	0.0218328961879229	0.0266657461067743	-0.00645575923954088	-0.0379404894536353
Peli2	M7	turquoise	-0.0912664467004409	-0.0394212225265719	-0.0595606967707392	-0.032293168730541	0.0348730319886422	0.0966832559791217	0.0587557483218242	0.0805166706499387	0.0813383447391479	0.05767373459661	0.113239557234568
Slc6a13	M8	brown	0.0353739781387207	0.0413984700047709	-0.0351304682895818	0.0182130847170068	0.0289803054291626	0.0201465416453433	0.0502577865571959	0.0287606717503531	0.0361724466868828	0.0549348370020737	0.0254357910791195
Steap4	M9	blue	0.107100301236696	-0.067746199735466	-0.182318309856704	-0.0801340499114362	0.0502468513975451	0.147403633623848	0.0487313641284672	0.090422965892056	-0.0470929540809395	0.139880590028555	0.105820116011602
Casp8ap2	grey	grey	0.0153830044382884	-0.0888360919930251	-0.11663811217323	-0.0724297542387558	0.043869751716574	0.054608954099483	0.0898904133275912	0.0290075044471041	0.107596611933154	0.096429749606791	0.0409234192250274
Sh3bgrl	M7	turquoise	-0.150911599860511	-0.0756020011258813	-0.0866022500882968	-0.0241274133126243	0.00298034002387804	0.123772161883683	0.143188003716948	0.041957631957987	0.0954025000922072	0.118611654679459	0.105163852015727
Esyt1	M1	yellow	-0.0911528329954926	-0.0837519697567137	-0.0822020863148404	-0.0512113069997054	0.0108092301559805	0.101743730285395	0.100580749385757	-0.0191234624254419	0.0652520603545668	0.121545667165481	0.0535267621040976
Pirb	grey	grey	-0.223572475188727	-0.158378502099181	-0.208275479279464	-0.140476769722397	0.157827812026403	0.307293968605647	0.271405535822701	0.109014811482143	0.195158433819072	0.28352661461433	0.233293401674866
Magoh	grey	grey	-0.13652212304765	-0.0922517845510255	-0.116378438949053	-0.0603230044284321	0.105734301698545	0.108707883017391	0.177398719548763	0.0912023872361504	0.163702407126917	0.190761375244703	0.123894479179102
Taf1d	M1	yellow	0.0108604736762545	-0.0959712909000292	-0.0490928250217462	-0.0704367119435741	0.0791024461401201	0.0715910376319696	0.0542413505953604	-0.00257097666537542	0.0715791972474176	0.117058275000197	-0.00401674262112792
Rps7	M6	green	-0.110738965411459	-0.0808943606143387	-0.160695706385626	-0.138180486920385	0.0754748440236552	0.234416580032614	0.241062628259801	0.0951288622546147	0.158688799665625	0.27662587204102	0.143139695180188
Tmem223	M4	pink	-0.0455438709128748	-0.0546611258024348	-0.00537137314854318	-0.0351497388283821	0.0288191201057059	0.0908498957139764	0.0826648648431884	-0.0105987464487034	0.0552732649837379	0.069044318699209	0.0234709472394128
Cep250	M7	turquoise	-0.0939735872895386	-0.0375852340004296	-0.0496689378148687	0.0123539060026544	0.0415942514093102	0.0920947425580357	-0.00604857564996866	0.0796024086572139	0.0413166123203552	0.0229064968674837	0.0361428236766492
Prnp	M5	purple	-0.0118693393848663	-0.00426402152954574	-0.0561311003495413	-0.0249634901701143	0.00701170167228721	0.0779540281951069	0.0485032353594178	0.0515067522326513	0.0410530971256307	0.0590397848035583	0.0525513974478548
Gys1	M6	green	-0.143292752375982	-0.0599369779839788	-0.0270131249457171	-0.0237813303905595	0.0388285881505817	0.124703820081757	0.0942103992732455	-0.00654330127483103	0.0592171210082364	0.0970751166319968	0.0578675429732737
Isca2	M3	black	-0.0894991241264068	-0.0325606012067062	-0.0137883392547317	-0.0477196920799246	0.0658919806722714	0.0453195633783505	0.05588756972987	0.032570877184545	-0.0210907021304796	0.0441722207534245	0.0335202025454754
1700037C18Rik	M1	yellow	-0.0154791225673023	0.008012233250931	-0.0199269710472976	0.00599680838057755	-0.0267325779499802	0.027483625555196	0.0151678710192111	0.00122172632772549	-0.0460208965702631	0.0265095021858885	-0.0202293863942065
P2ry12	M4	pink	-0.00118797803472596	-0.0406584396857282	-0.00419205571695008	-0.0347511524330228	-0.0249837965032636	0.0701927582267166	0.0451870558031386	-0.00551182316605393	-0.0146394412370581	0.00110916801734208	0.00071296906289122
Mdh1	M10	red	-0.0715261777667483	-0.0337165619865195	-0.0259411494901271	-0.0627805436702174	0.0891488494879938	0.120126374161787	0.00950163720691441	0.0175864600396379	0.0655916850777352	0.0562149171741448	0.0779476076486177
Cntrl	grey	grey	-0.0449361400969333	-0.0325984971122025	-0.126844497571304	-0.0584648250135611	0.0489307662023252	0.153618798268115	0.126713527418966	0.0188348495707846	0.0537002104274308	0.174196056580156	0.0698715466340186
Ly6d	grey	grey	0.00541360120760154	-0.042038677385568	-0.00362945910742739	-0.0413177090054027	-0.00341627341856568	0.0600591525660959	-0.00358855363449317	0.0661249904597767	0.0649725979067942	-0.00617443714176195	-0.00457720190098272
Slc4a2	M8	brown	-0.0879155674192574	-0.0454578304507507	0.0078922694757144	-0.0233897883789863	0.014737195293206	0.0839422446069913	0.0548834460691169	0.016497112464952	0.0798513927322575	0.050611587391536	0.0250971275088113
Cox20	M10	red	-0.0565737955651324	-0.0344447536114575	-0.0463109899677302	-0.0271607543488859	-0.0659529564080029	0.0972570329676549	0.116415751916981	0.00750029420344054	0.0281060939933171	0.130645863548133	0.109652809153718
Golph3l	grey	grey	-0.00563257978967072	0.00590486096241779	-0.0224162406493685	-0.0258038389040095	-0.00358076713045247	0.0667086730332753	0.0477361504681574	0.0137075418728589	-0.0286372421488803	0.0617210976478053	-0.021463587446968
Slc39a11	M3	black	-0.144592900919813	-0.0324603006010042	-0.0157952326010019	-0.0766081839213338	0.0551894833158971	0.121087174104784	0.0770919776709856	0.00536871085663041	0.0122834539502917	0.0753034852110319	0.0417082894722085
Rrp1b	M8	brown	0.0302966563206803	-0.0241986325397382	-0.00271421227790998	-0.0127237620061839	0.019032901298627	0.0230779141616106	0.028465214523922	0.0435516617393088	0.102810508173026	0.0139267179889778	0.0477183112216977
Cd93	M8	brown	0.0196600131131345	-0.00993792912004754	0.0432866221425879	0.00730348481542332	-0.00837291009373926	-0.031796206941887	-0.0401611293122095	0.0857763765208561	0.144186567033576	-0.0444870503951231	0.021890333617309
Tnfaip3	M1	yellow	0.523451692163513	-0.0310796070759255	-0.038466300047507	-0.0205014685554686	0.0703283562280923	0.061659819859677	0.0432435391868253	-0.127544490567729	0.000239068560511332	0.0708352450128096	0.100314747791266
5430427O19Rik	M1	yellow	0.125678721050357	0.0156957543241758	-0.0960490911533321	-0.0798876224046473	-0.0256958066782346	0.112881203184389	0.0540145127890207	0.0301189549186086	-0.0287442846138529	0.103224304871725	0.0621240328001155
Selenop	grey	grey	-0.0246414587825305	-0.00923572472316989	-0.0943790407971155	-0.108121895583645	-0.035869732433057	0.116989036196449	0.022594283694178	0.0883981357688401	0.0220727100689468	0.0542198017671104	0.0371377693096108
Atp5f1	M5	purple	-0.253308152404251	-0.152364306371074	-0.155562839431788	-0.106981776977151	0.121903177233048	0.377134396784473	0.192457065019551	0.118792558970467	0.171795419308402	0.239764842358511	0.158705696093146
Irf1	M1	yellow	0.163715380247108	-0.065706442533142	-0.15141283134497	-0.0680197434612679	0.0384170217060642	0.161683222421576	0.0566473289661462	0.0739535655705629	0.002878851991837	0.151084373700272	0.0727165550014502
Tes	M7	turquoise	-0.0973523262187927	-0.0769610350735046	-0.152954737259128	-0.0588808511533224	0.0409606268374057	0.0845719912175394	0.109812981990619	0.144491586037363	0.119814632974917	0.0908719112448973	0.11795690203149
Uqcr10	grey	grey	-0.0861790094811327	-0.0494341253928374	-0.110595953499973	-0.0643436271214419	0.0564814821989993	0.116432710535509	0.132119884555814	0.0274272681618467	0.103227882121353	0.150865750519954	0.0894044321839989
Armc3	grey	grey	-0.00254037534106763	-0.0575822371653953	-0.0345903014898414	-0.00109158882785742	0.0212899841671464	0.101785767666732	0.0532379340935208	0.0245835430260453	0.0405323243064959	0.03909098354668	0.0349037796806475
Fcrl1	M2	magenta	0.0152259869323184	-0.117664550791855	-0.0499720494941212	-0.0667155105322953	0.0756532433512495	0.0879089488044152	0.0016587140277776	-0.0143171171585542	0.100075364959551	0.0270024010732028	0.0411548182136866
Zfp326	M4	pink	0.0247824948959733	0.0309247823812162	-0.0660770845595989	-0.0341707351667065	-0.162130262230488	0.0203001609931329	0.0487652688788582	0.0202572531963338	0.0204607080435928	0.0329761178757042	0.00339140576096821
Nxn	M9	blue	-0.193271175018156	-0.088249986737659	-0.0727276477540625	-0.100065211234594	0.160402311772446	0.200142598514679	0.204056239024573	0.000478016225100867	0.116652864370269	0.210121242065771	0.159921072012305
Bloc1s6	M5	purple	-0.071898741037462	-0.000287272889414649	-0.0552975355668397	-0.0298300560509485	-0.0104691953817943	0.1532500497646	0.118383802886706	0.0303750374866613	0.0182237421476158	0.0803397274614779	0.0849922753898452
Rps3a1	M9	blue	0.0314039067798154	-0.0409391291352201	-0.260011691647869	-0.0740174237272669	-0.0443909272652698	0.179534817861855	0.22879268626254	0.054107605218355	0.0887541193087245	0.442679988459512	0.230696530395741
Zranb1	M1	yellow	-0.0334050852634585	-0.0517763523891388	-0.0750373358639939	-0.0234752221664491	0.102247851504991	0.140160544151138	0.0968093246117208	0.0204179689940255	0.0741424358732197	0.118565369389674	0.108186240162828
Mcm5	M7	turquoise	-0.0510973835792292	-0.00180534556606279	-0.0137179585536804	0.00133858029903998	0.000504251590165631	-0.00110646084905709	-0.00338465844109162	0.00708462373962462	-0.00397614274404805	-0.000693029574184977	-0.0038281448137953
Cnot6l	M8	brown	0.0619362111343311	-0.0280444731381979	-0.0814978895557878	-0.0193618631918652	-0.0458691331662414	0.0433663430528388	0.104881784484635	0.0388584882329315	0.0986226793599775	0.0784652922645308	0.0811373310830547
Lat2	grey	grey	-0.0191500903016665	-0.0829342617311031	-0.0574306562134893	-0.0314477303226882	-0.0332010926460342	0.0715518285491179	0.0356951333246783	0.0564412157423879	0.0445259226156783	0.0471839436097462	0.0477859634781755
Pop4	M4	pink	0.0186677557033866	-0.0413174302940958	-0.0454841127947997	-0.037231654478907	0.13995275939801	0.0120988740562155	0.034738993214801	-0.0200182397496396	-0.00620240570452319	0.0319323367611457	0.00303425255863407
Ccr3	M9	blue	0.109273647831449	-0.0094898633519865	-0.0498182243251935	-0.00707324251860855	0.0299727365589103	-0.00834734704836231	-0.00894579739738695	-0.068561643788	0.0300224771949955	0.077472975494111	0.0470698442767213
Slc39a4	grey	grey	0.0541658260811798	-0.0136872166692332	-0.0624346998133729	-0.0622718459202083	0.0136975434409056	-0.0094644153501142	0.00472598766703873	0.0589146972399842	-0.00831208246331356	0.0135293666555074	0.0170851998544535
Snx29	M10	red	0.074183876473519	-0.00358995304958613	-0.00359099027487967	-0.0212983314143359	0.0380542803666063	-0.00439672303760143	0.0419047871481605	-0.0422261023011636	-0.031110190664293	0.0501154303770026	0.044523085129175
Mydgf	grey	grey	-0.0345293989600355	-0.0304744861671227	-0.046802912190285	-0.0315744788127852	0.0252241839311125	0.0656719135782466	0.0703683899892565	-0.0041867762987919	0.0244603679205417	0.0625208333871876	0.0518951309240985
Ms4a6b	M6	green	-0.00926199191328615	-0.000209117587164516	-0.023013583611042	-0.051690308448612	0.0352572536606108	0.00330393012151204	0.0644166003005892	0.0485003374909395	0.0319939559115805	0.0184048472886799	0.0226053600141951
Rpa3	M7	turquoise	-0.0663075529175396	-0.047113253763584	-0.0647726302594159	-0.0117962194099595	0.0342480001089044	0.0602855537729714	0.0469084970003275	0.0557390411320475	0.03876614143177	0.0561060695532181	0.0334341291334253
Riox1	M8	brown	-0.0438673119323424	-0.0318429803168886	-0.0169644203457488	-0.00710848611886338	0.00464880498202328	-0.0513867108294808	0.0141941037091685	-0.0156228180156895	-0.0078709756790354	-0.0212012092234444	0.00695682076638199
Dhx29	grey	grey	0.0172366188228673	-0.0215472552575247	-0.0327541184555862	-0.0181513395360459	0.0236485976563662	0.108166394648174	0.0528885902557837	0.0484186387333256	0.0113081709864688	0.0716866939090454	0.0348718837226173
Atp2b1	M1	yellow	0.269119379655215	-0.0618188095676581	-0.150755798556657	-0.0639876643714086	-0.0279596829768446	0.0368622838761189	0.134998545433242	-0.00402484419056466	0.131709845382869	0.137013318019302	0.109766527169261
Srsf9	grey	grey	-0.124224190882094	-0.0669249684817207	-0.118193329389144	-0.049111236692583	0.0219085233434871	0.158850549763727	0.125364888306118	0.0677856315318183	0.127069904151549	0.162191751064864	0.117727752509835
mt-Nd4l	grey	grey	0.0204322325729982	-0.0296670582814567	-0.117446965837402	-0.0551331284651585	0.00336175267648556	0.0953789615111527	0.190854798865616	0.0731742932247194	0.0770807872632802	0.0565734420021997	0.0579419071428101
Matr3	M9	blue	0.0634679661974404	-0.0388555917701556	-0.0472337963869129	-0.0242978488260249	0.0416428117863559	0.10552555072072	0.0912260493604351	-0.0416864354359805	0.00925251307847751	0.132567953479443	0.0765074068880695
Pdcd4	grey	grey	0.036124629215065	0.00508274683021267	-0.0786452973389282	-0.0227049759013073	-0.0288988079676201	0.0186657335380001	0.0964570758834644	0.0723981711574647	0.0945102894315997	0.0302358748672797	0.046060110100493
Snrpb	M9	blue	-0.00927462289600256	-0.0589770424153631	-0.109988972597053	-0.00619166717666338	0.0479225318330487	0.110528879648991	0.0763149064767927	0.0102273822946558	0.0510813816268423	0.177788602220136	0.099240451594216
Mybph	M8	brown	0.031212052571233	0.0172632069425739	-0.0742271192816941	0.022234874452357	-0.0124269868351966	0.0228844759205302	0.0535094542369565	0.0532006417525106	-0.0155431120768331	0.0575554365772595	0.0272972580867229
Lrrc41	M9	blue	-0.000596674511695422	-0.00950565947269764	-0.0470650397385341	-0.0492143051728846	0.0106463282609572	-0.0015175013350732	0.0609488864804306	0.0189283732891562	0.025480503911461	0.0902278981005183	0.0369012424649602
Psmd14	M7	turquoise	-0.13172557220753	-0.0430643037896674	-0.0360330780568381	-0.116671579045703	0.101071988588756	0.133298087315062	0.121217220143433	0.0327977731836993	0.0873652468696121	0.128605610638562	0.118309070972444
Ssr2	grey	grey	-0.0321278185110724	-0.0300522395042461	-0.0289836178513706	-0.0077038147274024	0.0655440910250188	0.0473187392889822	0.0145727185051239	-0.0332666628437037	0.0234436185627731	-0.0101945018683878	0.00809268065130371
Arid3a	M7	turquoise	-0.156105428447718	-0.103783202474428	-0.10115314501556	-0.0464284704842416	0.0757560017041981	0.188934474992982	0.153909544489359	0.148441130503795	0.124048173888224	0.144425361579309	0.0636034592440481
Lair1	M1	yellow	0.0765269691195423	-0.0289141612084448	-0.0698942920689109	-0.00296238413952754	0.032043745362261	0.0721577125734583	0.0269642126753002	-0.062097000921046	-0.070161430832534	0.0883611980388163	0.0613115415828375
Cox6c	M9	blue	-0.184461906567575	-0.0913497024846795	-0.224170178847897	-0.094012426154356	0.123316157105793	0.300814092558802	0.244280277985075	0.0844011404417451	0.164918070280199	0.33917945512183	0.203318801114658
Adrb2	grey	grey	-0.072111228985119	-0.0915351152107082	-0.157594689775918	-0.0808748287111317	0.0455580976722353	0.172152868961434	0.121338891794948	0.107778428068396	0.107407816017203	0.179995899328117	0.142441144096707
Svip	M7	turquoise	-0.12210768331134	-0.0668322546123349	-0.106107127820452	-0.0551272876667881	0.0912210977815554	0.144155335451332	0.126661052704252	0.127602167136305	0.128675539423434	0.0988689962678852	0.0655414965497647
Gbe1	M8	brown	-0.0466079431235657	-0.0210275871905151	-0.0194090794415321	-0.0473361456072007	-0.0344556142022545	0.0938070711898514	0.023778996695083	0.0415179291925318	0.10702706939932	0.0869804012143705	0.0458625456638419
Tnfaip8l2	M5	purple	-0.205604258882054	-0.133898820894233	-0.175303349904096	-0.133027368315153	0.111253370419611	0.380694155969168	0.199633832432111	0.153597330703512	0.120396977640662	0.198585271461508	0.186862847224092
Alox5ap	M7	turquoise	-0.141412410406583	-0.118553684523266	-0.389627121164369	-0.196816654127297	0.000652281235831133	0.279439190899413	0.148443503864506	0.567097159533638	0.205711387417145	0.155306019853185	0.11564683261305
Pnpla8	M6	green	-0.105046717035201	-0.115961149828457	-0.0815608674574575	-0.0527905750625577	-0.0015343135991415	0.195027952800625	0.20778251267377	0.041761722055219	0.128580121674758	0.184106687817835	0.111011176384439
AY036118	grey	grey	-0.0582924887515416	-0.0922463549364001	-0.103659362103382	-0.092109193933357	0.0709179720143877	0.107849530913645	0.111175329305752	0.090107037024134	0.109959997744531	0.103281946381385	0.109018674486498
Rbm3	M9	blue	-0.0628234843813054	-0.0786862281828522	-0.149471209936991	-0.0510631682826519	0.0524596386949848	0.185678163295809	0.192773729443191	0.0571282966652688	0.138913157268287	0.274820758632068	0.152228321296526
Arhgap5	M9	blue	0.0859177353954716	-0.0357903485486816	-0.057861657593067	0.0460826979371515	-0.0463081620487188	0.0509935538950545	-0.00671414625686168	-0.0651680804020073	-0.060074856260494	0.122643568312172	-0.00706711473846381
Nampt	M7	turquoise	-0.114608087396488	-0.101434715405226	-0.0850849550384346	-0.0825937491095947	0.0255988683335377	0.125723943271801	0.0686914640345924	0.130488823009382	0.11732402677561	0.0400720074978665	0.0826648189301183
Wipi1	M5	purple	-0.159707525623917	-0.0721524739600095	-0.074652424693009	-0.0974773166538169	0.124006232792107	0.254820631742931	0.149811575105415	0.0308673826253647	0.110291632914448	0.154243600005216	0.0881712787760114
Gnb1	M9	blue	-0.146897857856244	-0.0709726719675596	-0.148138774246701	-0.0664700314623776	0.0367996799369689	0.176210022113303	0.203994103862295	0.0426576926980322	0.124058105649103	0.228136555362936	0.11429830889816
Atp5g2	M9	blue	-0.0730657728043689	-0.031138342488566	-0.0588869011195243	-0.0874091485722552	0.141645056173378	0.122785890153898	0.0768518635900674	0.00227613722959954	0.0858050357131606	0.185621117102332	0.135017550352521
Mppe1	grey	grey	-0.129096469748636	-0.0427328415916952	-0.0951250044338202	-0.0249980300062111	0.01882992322642	0.146082336965478	0.0921210313533946	0.0588417348095488	0.0526081338990996	0.10544469369599	0.0481240449227381
Mgll	M7	turquoise	-0.139148698516743	-0.0724142012072632	-0.0481246364951924	-0.0939405026112723	0.0607490743933302	0.111359662122281	0.10047290082483	0.085819090381448	0.12209244185745	0.0788051737902839	0.0791161308061853
Lyl1	M8	brown	-0.0557602390476067	-0.0291657935115993	-0.035614174578868	-0.0211827775129798	-0.003575976950544	0.120759277984887	0.114445163145429	-0.0321180334854747	0.0688557218254421	0.128077970612519	0.0591753767625336
Nsf	M10	red	0.105052413203374	-0.0467478999414391	-0.119644883458818	-0.013540321753905	-0.022786560518825	0.0350063463022698	0.0654213656826197	-0.0227132615164941	0.0364756316589776	0.088329420812479	0.161770961192092
Magt1	M9	blue	0.0187127000224177	0.00923903147537895	-0.060632635745425	-0.00963859937618673	0.0279158647214702	0.0343434290960533	0.114308391434231	-0.0436830549833672	0.0303986183241057	0.145886624426884	0.0723383947268054
Hlx	grey	grey	-0.0205866329715816	-0.108709165101808	-0.114136030821632	-0.0562564296965127	0.0035477459580933	0.13842802193475	0.0917049165297008	0.0559536061114354	0.0452858799082828	0.126048792603444	0.0411042993111897
Fam126b	M9	blue	-0.0582767248386725	0.00678547431355579	-0.0136922699856371	0.00388595389907403	0.0428844287964485	0.0729836334622472	0.0480222276158406	-0.0112807716828185	0.0193505017853461	0.0703652778346335	0.0356912461631788
Gm15675	M6	green	-0.0462844012328088	-0.0285646638681169	-0.0148813638565465	-0.0636350991544363	0.0907641836642767	0.0479735221654399	0.0291140246426539	-0.000117107158258201	0.0719795669681404	0.0250002454328152	0.0409924556881944
Abl2	M4	pink	0.0258780834805281	-0.011649484451025	-0.0690137962309075	-0.010666733383327	0.0643123744418636	0.0498882927532185	0.0312216794148714	-0.0118938468938302	-0.0242653457875277	0.0113797469851984	0.0100677167633813
4933439K11Rik	M2	magenta	-0.0512354798455229	-0.0494186841257655	0.0306343884679998	-0.033132431701024	-0.00482250910362444	0.00633578899822904	-0.000285016458162763	-0.0134966947283898	0.0162954760478728	0.00421017999615656	-0.0208443390829301
Il15ra	grey	grey	-0.00109442316424682	0.0371336451525482	-0.00461151911035161	-0.0450536518238711	-0.0208464522509373	-0.0454243382805357	0.0146534599935442	0.0432745877920443	-0.0233107016908186	-0.000183055291007029	0.0308721317309869
Cacfd1	M8	brown	-0.0379739292502376	-0.0509360970326033	-0.00867354168712427	-0.0169226577301283	0.002317661940288	0.0435164779044557	-0.002786761829568	-0.00374108892137209	0.0293372822218565	0.025227044084455	-0.0237898628332668
Aqr	grey	grey	0.0162075735448674	-0.0308497477484856	-0.00984055607531876	-0.0468246465102026	0.0599224492834412	0.022997510771989	0.0463272901820705	-0.0516242978069838	0.0736820223024507	0.0248535686093176	0.065495855661317
1200007C13Rik	grey	grey	0.00660451854099106	-0.0280642724220175	-0.0609462717406075	-0.0407585085297403	-0.0263597288118385	0.0540884930104432	-0.0199661068927739	0.0165670054798009	-0.00371834461429059	0.0256546293222014	0.0168195341247276
Dnajc19	M3	black	-0.0699354584987066	0.0175277085948988	0.0107696900434864	-0.0131891703894895	0.0160110462671502	0.0554384873523456	0.0257416478751189	0.00846373681608866	0.018866967665574	0.0402946862193359	0.0104603148980013
Lef1	M6	green	-0.0501103430211892	-0.0129245410303979	0.0189314414632672	-0.0183804999251894	0.0548085654882403	6.12464129157286e-05	0.0294373355162614	0.0159085687726739	0.026544884741707	0.0359257971407795	0.00255872626860808
Tusc1	M1	yellow	-0.0352816672768769	0.0131547416169428	-0.00761031442795078	0.0432418903710584	-0.00377784272340114	0.00106805142940667	0.00455946694516127	0.000990601713587291	-0.0230524602623086	-0.000643387038933215	0.0183539861835392
Pcgf3	M5	purple	-0.0595603206224495	-0.0358789259085382	0.0049577650964236	-0.0480094892783486	0.0397226759671962	0.0136360796335252	-0.0248717210736708	0.00821592463341689	-0.00926975326971711	-0.00297004069079773	-0.0067142051753597
Tmem175	M4	pink	-0.0257928598550362	-0.00994619438532411	-0.00234460068353139	-0.0113345747000669	0.0421952056475317	0.0455322768202849	0.0590382182916508	-0.0385811387401671	0.00589876607168981	0.084176166197624	0.0269380473002955
Bms1	M1	yellow	0.00247856423122075	0.0183571187518963	-0.0575035863540585	-0.0242267477457893	-7.984786975075e-06	0.0257992138272575	0.0263561224254017	-0.0333926285491617	-0.0283262900642211	0.0531540024535944	0.0224168167206295
Pafah1b3	M7	turquoise	-0.0425693267646916	-0.0231160977510877	0.0246252389832019	-0.0211973213746927	0.00680811621061187	0.0220818145820103	-0.0417637748230732	0.0916644907966614	-0.0017497062510143	-0.0290626353177604	-0.0472218488028985
Ankrd10	M3	black	0.00848240899488169	0.0480990376697335	0.0200561610797166	0.00530333223672178	0.0492932868896049	0.0585182372358638	0.000501506476751957	0.00405721586684455	-0.0204537906158751	-0.0305478965755573	-0.0121065279019335
Tmem161a	M9	blue	-0.0071390120889414	0.0397853666896989	0.0129795901254689	0.0304614131569729	0.0229713637112421	0.030462024500579	0.00658651128834984	-0.0179272100222564	-0.00843659411741408	0.0370397200684719	0.00653557182910615
Bst2	M6	green	-0.0304193292533435	0.00831016461046727	-0.031230034096812	-0.00347464995520698	0.0197018705646916	0.0136473386150658	0.0627866676333153	-0.00114753337429544	0.0536488071913037	0.0219936800510092	0.0480857217876327
Zfp617	grey	grey	0.0350753146243613	-0.0233727932072916	-0.0456098228374977	-0.0588665170924803	-0.0252720923722444	0.00219205070019966	0.0241242147238999	-0.00295607361377008	0.0386056097501883	0.090064577270236	0.00373811902504748
Cc2d1a	grey	grey	0.00939648429873852	-0.019255767738741	0.0599944262329954	0.0165247849484086	0.00435937698392678	0.0169389373294283	-0.014630677218348	-0.0212113162883547	0.0188869112408252	0.0098387260410069	0.0104843455560349
Rad23a	M8	brown	-0.0142713937450371	0.0218684360508824	-0.00918442303771566	0.0401946290654722	-0.0106376244855178	0.0229063142672649	-0.0111496780788401	-0.00648105126059091	0.00257942911196728	-0.0165874718674626	-0.0263353873835039
Tnpo2	M5	purple	-0.0167246010450416	-0.0562481335405275	-0.0796297506006864	-0.0698607862321329	0.0234254450295237	0.0774167330659346	0.0406931902466961	0.0631881866295207	0.0624728734777446	0.0696002901588459	0.0365193742052449
Slc36a4	M2	magenta	-0.0206323534503216	0.00877242584406492	0.0236758705001388	0.0180694766531993	0.0282473491898062	0.0375667344873432	0.00964606380338952	-0.017587801982984	0.0228084874569501	0.00982122843250067	-0.0321553689103497
Msantd2	M8	brown	-0.0109554967702111	-0.0247887652190575	-0.0277811404075294	-0.050714739338527	0.0690788921922601	0.0534022272288088	0.0515664156335115	0.0427112151196491	0.00774245832838996	0.020124197434804	0.0286767007218655
Tcf12	M3	black	-0.0351795092487784	-0.0241789539757482	-0.0291670925518457	-0.063304064629919	0.0118963106113232	0.0717962491594435	0.0041869915609515	0.051909819753798	0.0664502644079287	0.0266195835662839	0.00960430978324428
Gmppb	M4	pink	-0.0244469558988887	-0.0238252885575431	-0.0250864510976125	0.00403178484419388	0.0632845050204211	0.0300392315656871	0.00270978026770662	0.00629508850358486	-0.0299801110653527	0.00109555918223005	0.0191245215708729
Ccr5	M8	brown	0.0781735841106867	0.0123149787720443	0.0249750528995322	-0.0234122009557179	0.0294934285429956	-0.038058781209635	-0.0302087242942689	-0.00863489389745006	0.0853282522210334	-0.009291101736292	0.102820508383909
Kiss1r	M7	turquoise	-0.0400031546304262	-0.0415895879521355	-0.0325789872973784	-0.0442464724673495	0.0567040002344729	0.000737762866122539	0.0448957585248707	0.0631589213636696	0.0274318289589345	0.0419800292989415	0.0355521494615917
Tnfrsf13b	grey	grey	-0.0597528517719108	-0.0672400449040461	-0.0259890264966881	-0.0401451945348797	0.0473252234545151	0.0778332673992262	0.021898220073113	0.0611523199909635	0.077058322890588	0.031437131993981	0.0214922120234127
Specc1	M7	turquoise	-0.0158671509743482	0.0237291497913278	-0.0484628264541355	-0.0457777104187769	0.00548359422413012	0.0894123153973501	-0.0140345957821771	0.0766356542509523	0.0272888112267759	-0.00456089959569278	0.00500059737299204
Trim16	M4	pink	-0.0538885076297344	-0.0682239715663109	-0.0206690128686428	0.0106099135113044	0.0204257424455867	0.0708445654276435	0.0785674368056187	-0.00244406755913108	0.0277925536669221	0.0805831180980318	0.0504376563272546
Srp68	M6	green	-0.0496203317138573	-0.0546651419271497	-0.00260850511490689	-0.0691323986508461	0.0456236043653216	0.0887476851814139	0.0267960348645792	0.0297007699366041	0.0706346729324016	0.0171587326029556	0.0355156177641945
Ahr	M10	red	-0.00259416255925914	0.0287991303355926	-0.0646147869347905	-0.0489416854947053	-0.0343295086618863	0.00686789757835635	0.0662840583879918	0.0139938422924754	-0.0115944730597404	0.0614908169981389	0.0389882515815357
Shld3	M6	green	0.0372799935200375	-0.0070754670387699	0.00193196159245746	-0.00604073249802499	0.0136932111214467	0.0513355210701538	0.0298331540860807	0.00879107650320372	-0.0227425270284856	0.00779310225366935	0.072248094501983
Ccar2	grey	grey	-0.0416022151313584	0.00748079947574142	-0.0178076495667367	0.0159414052174351	0.0245867747408252	0.0146208884665228	0.0149033428849225	0.00158044560095588	0.0338304526896306	-0.00389158648123892	0.00904843461436078
Lratd2	M10	red	0.0876116078160484	-0.0408183157609197	-0.0515436677467019	-0.000583634532525815	0.0512008139291791	-0.00377545305904162	0.041314885309348	-0.0263245478864489	0.0261528150015134	0.093761219899859	0.0714176586919355
Lgals1	grey	grey	-0.0401057031002923	-0.0755868579648887	-0.0536945509213234	-0.0423739959607062	-0.0081429252668598	0.0835048000051103	0.0631972800034562	0.0426410024061422	0.0358193324722745	0.058976971849851	0.0427489997262365
Fam43a	M1	yellow	0.0761167703353877	0.0070083316624772	-0.0723560288668883	0.0259548182204421	0.0579094159894369	-0.0189267493045625	0.027594796246298	-0.0270169975944276	-0.0479287610322931	0.0864321512148626	0.0275717550646446
Zfp160	M10	red	-0.0761305691952431	-0.0212811600824572	-0.00878962647207607	0.0154260750989011	0.0678667971891136	0.0498779660284717	0.0193233333304699	0.00387329751333709	-0.00692412146668142	0.0510823462382902	0.0065555852054301
Dnah8	M5	purple	-0.0968508856064801	-0.0058039799524952	-0.0182722859865674	-0.00822783527461036	-0.00670877553051165	0.0711005772832255	0.00899167624509504	0.00595526440644846	0.000192562493737383	0.0438591606373428	0.0193730928607955
Epas1	M9	blue	-0.0375895068913361	0.0196585636749768	-0.0525206839421763	0.0471393723411169	-0.0298251983721543	-0.00707551122317373	0.0943620184059092	-0.00700685836412539	-0.00424918909465853	0.0319879277842401	0.0214005283881361
Gm10125	M6	green	-0.0122786036834836	0.00696889677086592	-0.013338873576341	0.00426504462286455	0.00175700989785933	0.0407765485142696	0.0373752970460803	-0.00858129438928233	0.05249465031703	0.0261005618728162	0.00492238007885746
Tcerg1	M10	red	0.0418607790567868	-0.00865847977553348	-0.0352416385850646	-0.054642795803211	-0.0049749348200449	-0.046171298351492	0.0363225233067611	-0.00148057343452688	-0.0158202135246102	0.0509123563506941	0.0904183623111867
Pum3	M3	black	-0.0321447630472035	0.00508990824000232	0.000666751496170177	-0.00432971068517424	0.075141659043936	0.0611004370545174	0.0209566903295754	0.0047970730818915	-0.000119833369027122	0.0245871392789425	0.0380555309709447
Phf6	M7	turquoise	-0.0415297221208487	-0.0458014027209119	0.0125640992982559	-0.0341810807661515	-0.0254192687283315	-0.000368890083348824	0.0342331203016005	0.0602189094728394	0.0985101778333353	-0.00280314657209273	0.00348449001256907
Tmsb15b1	M3	black	-0.0120437081676512	-0.0103965046639225	-0.0267342970582816	-0.0381441879925355	-0.00538831040487399	0.0206454269633171	0.0700704732288048	0.0497620345852265	0.042264162729254	0.0435113787455956	0.0374486553361503
Tspyl2	M7	turquoise	-0.0403901919777644	-0.0180594616074408	-0.120128380592119	-0.0640730678370477	-0.00411232922414857	0.061645760166296	0.0872693083338922	0.0898806079154581	0.0449216481130068	0.0588666654312002	0.0296496004996055
Asb7	M7	turquoise	-0.165274160392666	-0.149537285917874	-0.17303167943584	-0.129185287638376	0.0778868456127565	0.214335392611047	0.102367868878268	0.197523494404921	0.0834961801431184	0.139503294106316	0.0973451955291615
Fgd4	M7	turquoise	-0.116075353201578	-0.0972585774296573	-0.0450615628184816	-0.0724260162076269	0.105351514330623	0.140114611728549	0.137341312238754	0.0934286698211845	0.1176726313403	0.0890097837586648	0.0848846522584468
Ccl6	M7	turquoise	0.0490218660234198	-0.0612121287168706	0.016267106077829	-0.0597486085534143	0.0811034611645177	0.0456436698737472	-0.0114593994949801	0.252196637369404	0.143436147053387	-0.145553006618998	-0.0334906284297788
Cd6	M6	green	0.0241912202425997	-0.043980436430729	-0.0409610567291176	0.0172913488011341	0.0173759465621619	0.0414247234683765	0.0851614377191066	0.0227273414745737	0.033804640731519	0.0699392451347217	0.0774141643871869
Pi4k2a	M1	yellow	-0.0170222592240497	-0.0721551000992256	-0.0194616348162281	-0.0241782656540303	0.0396390580388055	0.0749716397609017	0.0490942867412838	-0.00924011169170091	0.0890567360689516	0.0926352606135636	0.0350274901755752
Mitf	M1	yellow	0.0699278994439153	-0.00172929310990713	-0.0763585775653814	0.00811688372885797	-0.0508535866737619	0.00980705067213935	0.0573404050252877	0.0393143427516473	0.0116822116489972	0.0277708470181944	-0.0229540015633158
Abca13	M10	red	-0.179368311081718	-0.0634316209778591	-0.0249440731971746	-0.061939115586165	0.0290610133487229	0.163522418617005	0.168008949458702	-0.00422938351192841	0.13584382191118	0.157522235003116	0.139613866795742
Riok1	M8	brown	-0.0484056366495194	-0.0185249273062929	0.00280093158468431	-0.0157525743378121	0.0317932560622261	0.0522705413890316	0.0560048202098866	0.0103787153603659	0.111887302243432	0.0412656622643332	0.0942936432255192
Sass6	M8	brown	0.021670611429372	-0.0489983664000419	-0.0572833682355196	-0.002707388250102	0.0567409673055428	0.045983779002462	0.0128996236919339	0.00799108543814679	0.0438720813203686	0.0174797296801888	0.010789080996127
Casz1	grey	grey	-0.156418948450888	-0.066289608313288	-0.0641728068398679	-0.0175594029403537	0.0307524734040934	0.148831291059929	0.106140548412489	0.00959878845690907	0.0793728945817403	0.145591984604152	0.0698306582198058
Wasl	M6	green	0.00301252278059569	-0.0457402223242594	-0.0599179751815877	-0.0813659931995161	0.013009971085672	0.0781950464382343	0.0663223743054934	0.0632952875634808	0.0471382513823375	0.0223350933332469	0.0460260013041536
Erc1	M10	red	0.0358575922537862	-0.0484849884716422	-0.0496372293436332	-0.0300752131754857	0.00285273007147035	0.0607685580766664	0.0490033299860177	0.0122438822755786	0.0548116018104123	0.0322806254702927	0.0940785834172227
Ankra2	M4	pink	-0.0482640128989958	-0.0264463653935039	-0.0113380797974991	-0.0263495236289022	0.00575991041082985	0.0601962969427019	0.0143084138913867	0.0241437886319946	-0.0117127499924401	-0.0216814944801921	-0.0405880572916126
Zfp503	M8	brown	-0.00437340806685357	0.00547990278790053	0.00727398960515955	0.0142583574539507	0.0380090955806549	0.0224749515898157	-0.0124834486424169	0.00124851074915422	0.00477229863215418	0.00988839051868832	0.00434291860065266
Noc2l	M2	magenta	0.0301385813937323	0.056862177422302	-0.0205174812861276	-0.0192480254395467	0.0432196722768086	0.0343265849336015	0.0325939680004325	-0.00115251402844281	0.0570130194682107	-0.00251846338382105	0.0119526994116258
Banp	M4	pink	-0.119291669053383	-0.0934392975929981	-0.086777616445525	-0.0436284335874142	0.181778199704632	0.109847714102037	0.099399890010578	0.0540610293822576	0.0631338584841841	0.125088322716156	0.108459236372183
Sp110	grey	grey	-0.174067502318574	-0.0726112049137568	-0.114627380759986	-0.108133828437413	0.0629771170061018	0.130314370023416	0.111410158365985	0.0391512187879991	0.126948216718884	0.100771106825689	0.11799894361428
Mdh2	M6	green	-0.207541373475809	-0.137976223531333	-0.129723524005167	-0.161337468241983	0.1527072535481	0.25585986499892	0.247976070022888	0.098238754164151	0.179221997562184	0.249754645491861	0.190224598119182
Ifrd1	M1	yellow	0.337904437977224	-0.0565879089676347	-0.126662546730054	-0.0211601631828546	0.0695423393385924	0.0506239943905775	0.124358136378751	-0.0429054233465936	0.15858578379785	0.167292801884222	0.143217703532499
Eif3c	M6	green	-0.0630413706152523	-0.0432562522453449	-0.0980461138689072	-0.0220921325171218	0.0181017538305863	0.120441229729144	0.13656467927268	0.0378729609902733	0.0748768067646222	0.155574061771788	0.117796772018048
Rnasel	M7	turquoise	-0.0716115764318995	-0.0699422439954822	-0.127283652919273	-0.0921318143715853	0.000736038233758187	0.108683448601298	0.06358581152582	0.157716193066858	0.115768558451171	0.0454464925596429	0.0575068649956943
Canx	M10	red	0.0108707009372701	-0.0528646114758374	-0.0647331730975264	-0.0157099743105953	0.00064673327147668	0.0840232183090055	0.0447848244439194	-0.0329032629630606	-0.0126064607270767	0.0920728709169882	0.118970852148822
Nfkb1	grey	grey	0.0841107010004537	-0.0600657152190854	-0.14295838557816	-0.082324916838121	0.0726521989718734	0.112600733023722	0.153010049136997	0.0696093188660011	0.170225405330656	0.14911105101559	0.101203091278838
Srp9	grey	grey	-0.117235047964951	-0.0783677805303597	-0.146979609720771	-0.0272837480475649	0.0386858139097735	0.16084065190442	0.126839663800011	0.0632333998624	0.0801259841808759	0.16826151758018	0.0886234840640791
Lpp	M1	yellow	0.000233776737470975	-0.0144541304066516	-0.0693192714931935	-0.0291125121545429	-0.00967807083119225	0.100917252324013	0.114143451501318	0.0215633556774019	0.0246393953087121	0.15962433647434	0.0706941512592992
Ndufv1	M9	blue	-0.0507068330345731	-0.0357677108818287	-0.0606222166028466	-0.0663930747343862	0.0219070920610117	0.0546167482302012	0.0855073197423233	-0.0300433206858507	0.0754162914643605	0.129827404589213	0.083557238674034
B930036N10Rik	M1	yellow	-0.0172103420773615	-0.0181056491520486	-0.0329921064234508	-0.00313091268767422	0.0649232697676316	0.0412922913312208	0.0150800773007858	-0.0208026233740247	-0.00506629514575275	0.044764145635765	0.0111606321751508
Pxmp4	grey	grey	-0.0483037012177085	-0.0154592176764661	-0.0498482082738855	-0.0403647393686978	0.0454416047996592	0.101322307324395	0.0528951483461633	0.00790250285652987	0.0739761142022693	0.0493133313327588	0.0541971284591004
Prkcg	M6	green	0.065045011990492	-0.0270237493537138	-0.0691258396588909	-0.0141678069350887	0.0241218696043469	0.065642152613806	0.0242360357549723	0.0285663455662186	0.0136517235527636	0.0225271965633945	0.0427768864087303
2300009A05Rik	M9	blue	-0.0391310403540952	-0.0397087083616443	-0.0291711470578388	-0.0509962707722958	0.0243499647706465	0.0298623056650736	0.0525099788641261	0.0446240136661599	0.0660751947028408	0.053201205487048	0.0189261412175648
Acot13	M9	blue	0.035183458702486	-0.0251833835398182	-0.0552158289475949	0.00263233886301172	0.0416312895716997	0.0233082874223422	0.0340160443248143	-0.0156761485065054	-0.0267546357161618	0.103650074770922	0.0226857064115665
Spsb3	grey	grey	-0.00423882721032486	-0.0458997835680337	-0.0622620948592391	-0.0477322725139666	-0.0248857945039439	0.103236381551513	-0.00692536725456699	0.0610218801203701	0.027958744257428	0.0390058672824953	0.0451285594786207
Cnot7	M9	blue	-0.108594030092645	-0.0548221133432218	-0.0876881217549678	-0.0834499763662863	0.110288040463811	0.180982727312961	0.195288405987824	0.0272432534197327	0.115458069344886	0.226889411062327	0.123713614926869
Agtpbp1	grey	grey	-0.00940254839756853	-0.0180118681178624	-0.0410608801905157	-0.0398394204270888	0.00157840998748166	0.0241453113248454	0.0526953394179499	0.0563697024870724	0.0778324156159776	0.0880222399423651	0.0777095481087538
Macf1	M6	green	-0.14714854381402	-0.103213272178305	-0.0818712337727028	-0.103554610089816	0.0310436806070068	0.168379819420008	0.177243025512365	0.0501933885432907	0.166070484910429	0.162229299145171	0.139766391840937
Gm50240	M1	yellow	0.0970463527535393	-0.0224132450788951	-0.0092281026512412	-0.00895935601306664	0.0417600624234168	0.0574294722114373	0.0592222587818109	-0.00433815002356768	0.046719701132511	0.0226094528920129	0.0554141377537188
Eml4	grey	grey	0.025072800984649	-0.0515142894560896	-0.0463817474028653	0.0053447215252611	0.018615218872355	0.045742558099773	0.0326582083796355	0.0233776408965697	0.0765048196948246	0.0664537687085415	0.0171876529165177
Rasa1	M3	black	-0.0140942990176608	0.043878161620469	-0.0482366817283241	-0.031567801977289	-0.0119095174768008	0.0282030777149514	-0.0253912177176823	0.0323370875550779	-0.00703644591493586	0.0255897746368372	-0.00754864856451194
Sec11c	M7	turquoise	-0.248357426016198	-0.127243214606908	-0.122496507125323	-0.150527016484799	0.125301731158093	0.325849560322323	0.218786182541176	0.146716293240518	0.196567668247112	0.22597002575588	0.145614536737749
Ikzf1	M1	yellow	-0.0790473558553598	-0.089604050841684	-0.0890897837510582	-0.0738922007821608	0.0248407920465134	0.169964548744143	0.182734597757127	0.0389496931152639	0.0951027521821768	0.155463957905136	0.100226208080085
Atrx	grey	grey	0.00760245636048882	-0.0987209285144372	-0.159748040276655	-0.100267109607185	0.0402957286985356	0.122654113383364	0.111336796361123	0.0941103108220861	0.143856776331012	0.156364912373118	0.161517711351392
Fos	M1	yellow	0.101116794149494	-0.181099330508089	-0.222054959512038	-0.116299464473419	0.0849025614463492	0.348596063293492	0.127053998879876	0.148647113306135	0.0317565007673446	0.253783153079416	0.118151852486874
Rhoh	M3	black	0.0111721470213248	-0.0513510234090857	-0.0479564044075063	-0.0301052048122143	0.0401461587346457	0.0491502338858589	0.0439663557329001	0.0229359190398474	0.0360986099963932	0.0224565320716738	0.0361964076021041
Lcorl	grey	grey	0.00950530173677214	0.00250409278866852	-0.0799147324044866	-0.0141196039942009	0.0430828976134886	-0.00213948372108409	0.056247663879845	0.0597467927668755	0.0454554282527017	0.071632254941437	0.0715045125363512
Syne2	grey	grey	-0.032718508805101	-0.0579930053439256	-0.101854415408279	-0.033324138421099	0.0436229688279149	0.139812190990899	0.122079277132007	0.0180817381173274	0.078534782988979	0.158558460363773	0.0993533921102185
Tmed9	M9	blue	-0.0575666570582358	-0.0243548496461389	-0.089319456515706	0.00379413538462088	0.00120810243050924	0.105785595331231	0.0599204296334205	0.0200925864589442	0.0257024303537647	0.149312491263421	0.0585728865235945
Trak2	M8	brown	-0.167899518943598	-0.0942910191861124	-0.0285238356078437	-0.0656845248377291	0.0356553064171013	0.198687116934968	0.14335695871753	0.011542077994289	0.142070995021209	0.129259029876879	0.0763049488714784
Sav1	grey	grey	-0.0754846524444301	-0.0257487486131073	-0.065988322929299	-0.0347467453594883	0.0289453576140305	0.115856768424135	0.0978613566296396	0.0183542816962434	0.057575285199783	0.101288075665596	0.053674767784242
Hcar2	M1	yellow	0.220479269643227	-0.0897948712418022	-0.0758153442718817	-0.0440990353811109	0.0943865857760856	0.0925414543088755	0.0796272750631485	0.113524261448681	0.132433768582003	0.000820556369965557	0.0771464336649874
Timp2	M7	turquoise	-0.287143424714357	-0.182409618762548	-0.217297722335007	-0.180645487248057	0.121534655528139	0.288538897886907	0.221519205065616	0.332417813354188	0.257616264533169	0.123042721985749	0.170084719491161
Dhrs1	M7	turquoise	-0.207676673500169	-0.163446819534689	-0.182382177787908	-0.130669125329647	0.0193666360289659	0.164927273436297	0.195280161473821	0.101130631420562	0.12221646257804	0.180760070002777	0.14445405118872
Cfl1	grey	grey	-0.0493486263760792	-0.149493044274338	-0.408337858347883	-0.200863162284303	0.0557458080952786	0.26794861302152	0.199823093503775	0.373398634857313	0.18459521899443	0.236015672554536	0.168816680722203
Gch1	M8	brown	-0.0634710530288054	-0.0447602730544	-0.140038793136555	-0.0830385404610284	0.0640364619073623	0.060916431161013	0.131532905344942	0.113401582221638	0.171414407961822	0.130410782399058	0.0710821101126963
Cdv3	M9	blue	-0.0709612285768691	-0.0152767617872003	-0.0306174723624677	-0.0290777603463139	0.091890536245107	0.0610207273095287	0.0787460690791715	-0.0480368277226087	0.0603185749726546	0.129682509638051	0.084444569163418
Sap30	M7	turquoise	-0.147566577058732	-0.0929113170370614	-0.0921567518422404	-0.121565776054992	0.0554593490036652	0.142020966225775	0.139999448090278	0.101768708015859	0.125438221076846	0.110482810073616	0.0768571434196453
Birc3	M1	yellow	0.27593244535347	-0.157116221030409	-0.121785099416873	-0.0767006308394046	0.0111945816789159	0.102872081750581	0.0903373728582329	0.0172836654788727	0.0619931517081296	0.130112312975231	0.127735275566895
Megf9	M7	turquoise	-0.186118247180298	-0.110672817423632	-0.107298949874506	-0.0800781167339313	0.127825450024255	0.218868454666702	0.189467216399865	0.0739610589569224	0.146100413361663	0.208253461064517	0.161608029512344
Slbp	M9	blue	0.0348857479629713	-0.0109623235741707	-0.114127924491022	-0.057014897548779	0.0328041844818867	0.039657705458618	0.0693483059908724	-0.0092422753317822	-0.00673519692648253	0.135279011123128	0.0654947930818263
Nasp	M8	brown	-0.00867454153311575	-0.006348212685588	-0.0218251342291461	-0.0290604155133308	0.0318777311906449	0.042943935023503	0.0486974356457586	0.00609217358209214	0.085358497281185	0.0669497210957449	0.0482167241443802
Ctse	M3	black	-0.177311235273578	-0.12926545966529	-0.124881013011957	-0.26544732896765	0.109288516178651	0.268344184898247	0.216582149901926	0.108638999572227	0.171899454571351	0.202493584181871	0.185749464202746
Xrn1	M4	pink	-0.0591457027355998	-0.0616966450578782	-0.0264890332391547	-0.0603903980864522	0.0912013741827505	0.119477999797486	0.0623994339925585	0.0385770742618657	0.0264091878642765	0.075366860011092	0.0136574116144582
Slc35a2	grey	grey	0.00235984326878332	-0.0461080377629247	-0.0847180437322866	-0.0476524719194485	0.0553324628460868	0.0228716198952193	0.10535820383109	0.0344574312537927	0.0436662262483821	0.112523619155857	0.0309224609661021
Tbc1d2	grey	grey	-0.117137247701612	-0.104600193417196	-0.0720718658479986	-0.0836382054330044	0.0663989081968741	0.110318169943933	0.124554357872838	0.0438639215161502	0.166819272011749	0.119983401702541	0.119126399802269
Chchd7	M6	green	-0.0573127730538023	0.0513798020266604	0.00201025841340029	-0.00224152483477957	-0.00805131569554725	0.0389836757674282	0.0408389122161409	-0.00500359689608354	-0.00678620327774669	0.0161473706072454	0.00154291893192097
Gm13822	M8	brown	0.0158717069793215	-0.0166384013062829	-0.00116266765309218	0.0187691147394811	0.033373969418184	-0.00154254368840991	-0.0222655293096682	0.0237399006240453	-0.00390280673258347	-0.0160158299062797	-0.0322518479571026
Cep164	grey	grey	-0.050970382383696	-0.059525621928469	-0.0815876236933368	-0.0422594490599425	0.00277413629015717	0.0700638556667541	0.0336009061382333	0.0133550516263189	0.044896664099904	0.0603087570322308	0.0481628152406291
Zbtb2	M9	blue	0.00142979117706738	-0.0768643334449384	-0.0240448200924321	-0.0396740290852657	-0.0279572793742377	0.0289667850515513	0.0340742391863729	0.0182945089850234	0.0183224729603511	0.0574975250833391	0.0845704567661493
Erh	M6	green	-0.017741334099586	-0.0135999551200816	-0.0567754030425717	0.021184064868728	-0.00929046351894779	0.0322014224302795	0.0506348102269917	0.00587505305937096	0.00325915345831449	0.0244041707053338	0.0390872550563504
Nudt9	grey	grey	-0.0270159449940508	-0.0362112497437858	-0.0683656586147781	-0.0057916557968409	-0.012102200305295	0.0852970054751219	0.0417659776015979	0.0266373247324422	0.0557071813199753	0.06921404357304	0.0376890033830732
Gm10642	M7	turquoise	-0.0890963141444416	-0.01704638741548	-0.035401849873086	-0.0197622383304667	0.0474009234324685	0.0838057305125884	0.0412381830642661	0.0358678813254142	0.0792387611264524	0.0622041466943936	0.0403847938922978
Gm10827	M3	black	0.026078626107483	0.0164375694529863	0.0638317016907859	0.0968111096391632	-0.0352662174670261	0.00766576051358492	-0.00324384406420538	-0.00432334845033562	0.0142373452735503	-0.0335553597440205	-0.016750448753098
Dnajc21	grey	grey	-0.0599465665858559	0.0110917302029651	-0.0164629290218788	0.00360016479555034	0.0484856414033977	0.0622780535166566	0.0295956482402	-0.0101741924792645	0.00359381270532579	0.0443549493115033	0.0450741887959008
Ly6i	M9	blue	0.0289770097193479	0.00598671294431826	-0.0499497291231876	0.0375376508389685	0.0575384535738103	0.0193158469860606	0.0655500446230709	-0.0222297545394542	-0.00115453024173216	0.0502244776525417	0.0214639198097087
Myg1	M9	blue	0.0183832845462766	-0.00905991593250648	-0.0811222169826003	-0.0279091470738976	-0.0191409763309976	0.0624321009223173	0.0509348150570563	0.0439366470730014	-0.0141966788799128	0.0594153578553392	0.0457670558208635
Zfp511	grey	grey	-0.0217073297238137	0.0257155681123878	-0.0257010312996838	-0.00269811706711833	0.0267329926838557	0.0132258557183421	0.00318276412736341	0.00812826471593761	-0.015734554377336	0.0279119960588891	-0.00105788662000729
Mvd	grey	grey	-0.102552170272477	-0.011098178765967	-0.0372041759026833	-0.0469605453998553	0.0634247644783481	0.141840650366667	0.0878333532076166	0.00872052182308459	0.0550384113037788	0.100104132147072	0.0612655054349219
Nr4a1	M1	yellow	0.326773671952754	-0.0571348427914837	-0.107809580422874	-0.0193693872193416	0.0217589406646836	0.0981490174079584	0.161623272509097	-0.0212317819050939	0.147719525321601	0.21030382439598	0.129368503100245
Plec	grey	grey	-0.162564408680823	-0.124527217855494	-0.144994391286597	-0.0778704601833013	0.0270348420545814	0.18429906226665	0.152454851455564	0.0605218554302798	0.172621842282854	0.151393450514734	0.136322572820338
Smg5	grey	grey	-0.0113108744859836	-0.0828966174123179	-0.0223293738280733	-0.0241458513430804	0.0232166520913871	0.0692454880125122	0.0522111502807885	0.0391330930048699	0.0784630447374828	0.0582447595628928	0.0730080659219618
Nos1ap	M8	brown	0.00643259308712675	-0.0530175537441383	0.000296222013804202	-0.0209672381458976	0.00890611769814298	0.0431386243167556	0.0699448021773024	0.0417245459890153	0.0811901519633395	0.0708648609144649	0.00924048764586827
P4hb	M1	yellow	0.0674741945029166	-0.0562247322021989	-0.0582584589804265	0.0087268250345822	0.0121823647109606	0.0159103036965368	0.072577070023512	-0.0444507193177432	0.057610575276087	0.113134128549971	0.0456471292705966
Tra2b	M9	blue	-0.0218847314786066	-0.0893128199186883	-0.152370467341846	-0.0411019569859343	0.0140029959480365	0.11147031271501	0.160475806413627	0.0479808511001996	0.122099112247888	0.220535376721141	0.104268395634343
Ulk4	M9	blue	0.04856479906526	-0.0281950416923659	-0.0638686940655025	-0.0610411426069525	0.00574933751062128	0.0223683935578732	0.0836190647913717	0.021627861631951	0.0737911521461178	0.0972944254920024	0.064205219705574
Rfxap	M1	yellow	-0.0143041445334811	-0.0549255888267794	-0.0735890365038723	-0.0222916157962668	-0.0130252088675064	0.0366896445947466	0.0628044805268035	0.0123611405195191	0.0516896282441472	0.0789673236468537	-0.0135047539747123
Pfn1	M9	blue	-0.0820471538255643	-0.171094269869394	-0.454946451888636	-0.236628918761791	0.0821573670580333	0.356114732014039	0.244062523488702	0.43905601399379	0.171163233779928	0.366782398380602	0.254523963892239
Acap1	M7	turquoise	-0.186306687013813	-0.0744148743394412	-0.0773448328898646	-0.0878131219437701	0.0797461109950748	0.182374836478612	0.125142444680185	0.117723876928432	0.149339507898306	0.0952046742741987	0.119436855325043
Chil5	M7	turquoise	-0.208264846496003	-0.132866302423799	-0.0780099507530677	-0.115200365721481	0.0857868730625652	0.229187465473454	0.194381875972947	0.0219608241875398	0.163637622737284	0.182170249923749	0.145347898804924
Cd24a	M1	yellow	0.00714952662700727	-0.106268565707896	-0.19712767831039	-0.126502671943888	0.147944325873555	0.192979524578119	0.172906337036917	0.212473415299259	0.218185183387683	0.1387835894517	0.187779388544034
Msmo1	M1	yellow	-0.122616696985235	-0.0324274135927712	-0.0174579238576213	-0.00765624151251629	-0.000125512015600765	0.11206628177792	0.0803295468880065	0.0208413515564033	0.0619270764334416	0.103751946064261	0.0942010147256392
Pnpo	M9	blue	0.061106770702284	-0.0586936627008056	-0.0572979971035476	0.00870173405412874	0.0126930303969275	0.031102070563487	0.0480807448434027	0.0195402438006537	-0.013778237588692	0.134699313143105	0.0379901103556882
Trappc2l	M9	blue	-0.0756390082709319	-0.0102875371361286	-0.0221050843879576	-0.0476410467854906	0.0821702325199974	0.106747768185795	0.0852409724385656	-0.0046985962044719	0.0466526022891186	0.148197416243708	0.0922130730368246
Plin3	grey	grey	-0.173519164377579	-0.0498373133662079	-0.0701306970579555	-0.0647880354596771	0.0821209195291464	0.153944740091671	0.109608853155495	0.0217597880786534	0.0734483608247773	0.098902918250676	0.0725354096759863
Ccdc88c	M8	brown	-0.144394100121487	-0.0952303655551744	-0.0859780826718166	-0.0471497392098558	0.11117680749947	0.154553175408648	0.118063241276773	0.0706130596372408	0.199562782349151	0.147011272367869	0.0938132585430844
Hk2	M1	yellow	-0.0355275632097871	-0.102021935852318	-0.0676215877718599	-0.058488611215028	0.00271662385456179	0.0980614251243285	0.116986064479484	0.0384686484879949	0.0531751510963905	0.148346887404516	0.112243464020428
Ly6e	M9	blue	0.0869619999591983	-0.0363982106647277	-0.184054747018479	-0.0683279531902963	0.0368229785933375	0.128151332968017	0.044864978986563	0.125224311588269	0.045262018767718	0.183546736271017	0.111735538206032
Rpl5	M9	blue	-0.047168882880844	-0.0754448234991058	-0.153002936582696	-0.0544073856496296	0.106981411440729	0.187367464738043	0.180386249067864	0.0768729633310411	0.0957370954520253	0.285507253870079	0.137663011658383
Tubb6	M10	red	0.11526267899932	0.019571046896444	-0.0560661612949239	0.00341549456295349	0.0408961578842595	0.011593989132839	0.0452056768073559	-0.0145526117066467	0.055608614763169	0.0595940419839323	0.109678561571297
Ranbp9	grey	grey	-0.149005749119609	-0.0803191540359645	-0.11144287430955	-0.0688313588547695	0.100531686575105	0.188639992550495	0.183742342583046	0.0106459783162895	0.0955891491257314	0.192268370457812	0.155022699023892
Sfr1	M8	brown	-0.0750431009030721	-0.0294379421510238	-0.0855798966858146	-0.0783558742682798	0.0458320333719261	0.156502590639223	0.115793665162449	0.0913940932814008	0.147039343699	0.11241534171828	0.0671814409576427
Zfand2a	grey	grey	0.073894500644604	-0.0193878154063466	-0.0190612354566732	-0.00285156114297	-0.0252247056324474	-0.00694776191607837	0.0316110565196071	0.0052391589982479	0.0505247551545612	0.046164048173558	0.0363956349559429
Rpia	M6	green	-0.0241553652375182	-0.0555931872635899	-0.0584143741007612	-0.0235573641731292	-0.00483311473056787	0.0793105857758952	0.0836702181874108	0.0305171011592598	0.0790384180059856	0.100294429795822	0.0711308084382983
Slfn1	M2	magenta	-0.108285279241227	-0.175148741517112	-0.130645722279649	-0.160258518178205	0.0739425817985657	0.210664880648624	0.179371115143592	0.108145663594382	0.139113891013849	0.195300077401842	0.139119188452835
Slc40a1	M4	pink	-0.0637540826302998	-0.0973546552461328	-0.166524023884682	-0.0824605356558928	-0.129718665104009	0.180094183576786	0.122257178009879	0.143382451489857	0.0989875370043761	0.116127110419786	0.101828072529934
Rpl37a	M9	blue	-0.152359241810802	-0.150824218024381	-0.227001504193287	-0.146751112143962	0.100888573388413	0.288302732761037	0.260568880905072	0.101553626911705	0.179283673273822	0.333369428311959	0.193898090833153
Tacstd2	M8	brown	-0.0318536468000087	-0.0448961548095751	-0.0825838749631453	-0.0486490773858012	0.0689802833299071	0.135324070311398	0.0954470396871883	0.119208992403906	0.111312171730789	0.0663863702863082	0.111257402046203
Ccdc115	grey	grey	-0.0693416664310935	-0.0519587962369087	-0.0894401344914079	-0.00823413172384766	0.0634333222529897	0.0857046705370639	0.0694926774310829	0.044038274457404	0.085001693255285	0.0989027492970297	0.0799419719116557
Dnajc1	M3	black	-0.00427242034001208	-0.0164835157987363	-0.0374377183714816	-0.120236731901416	0.0733445358433778	0.0245332584168915	0.0573918364699465	0.0587212166837655	0.000327444267641121	0.0909974824231137	0.0469726667565116
Eif3i	M9	blue	-0.0621667548046273	0.00724818811065141	-0.0630178254986177	-0.0462396667559372	0.0508810859962806	0.116306136067981	0.0673357687734511	0.00960348711985432	-0.0138920233622012	0.106580578507702	0.0490433199242906
Tasor	grey	grey	0.00761637380545281	0.0207642257604652	-0.0956238945891436	-0.0855113852387663	0.0518049992929779	0.0345744399803423	0.0611500029333069	0.0280997499641636	-0.0212875878770265	0.104461891798346	0.0222178606298955
Dcp2	M8	brown	-0.0527240565493439	-0.0400749812493031	-0.043990568078748	0.0278545293753473	-0.024153280027401	0.0630168928719016	0.0342024286863299	0.00684672281545074	0.107744817612205	0.0461355188020607	0.0479975717249893
Fkbp2	M10	red	0.00507858951307911	-0.00734839814846988	-0.0635480939857675	-7.21870026486671e-05	0.0548790074561277	0.0332210383132244	0.0567106155084796	0.0203129594543397	0.0320170738931434	0.0812299003300504	0.0987305916059196
Rnf7	M9	blue	-0.129352168386707	-0.0221046221624625	-0.0506316384132123	0.0011273665804398	0.0245278140530276	0.12458928975575	0.106244247661153	0.0206852657219957	0.0474848685790995	0.14429903921616	0.0705552662170259
Trappc6b	M9	blue	-0.144392435419224	-0.0726134391345901	-0.0769149933968611	-0.0350330210960923	0.117886215706739	0.193357015403457	0.128336445822516	0.0313069954927637	0.0747574303963534	0.177097637749156	0.107932930557822
Arpp19	M9	blue	-0.0622535908699393	-0.0523410413536977	-0.0917096322660767	-0.0678451003288746	0.0571310812156288	0.191803423005357	0.108329909221905	0.0367134183821863	0.0880745807982097	0.217373532086667	0.0961704594073558
Add3	grey	grey	-0.192674525739848	-0.197475601366806	-0.181570189164736	-0.121005865240504	0.0944390378042977	0.256616154730047	0.19433923996219	0.108022876746435	0.191850375300232	0.132991002804894	0.158545453549328
Arpc5	M7	turquoise	-0.143227278649815	-0.102846593626981	-0.270747800365813	-0.195564446479387	0.131756640206883	0.247158048205901	0.190254205759532	0.427879740421059	0.238582921785592	0.145029700696423	0.143882394157818
Il1r2	M1	yellow	0.180407942219291	-0.0403883556401554	-0.0483954238123704	-0.0943107470595725	0.0941126635567096	0.0752515101455211	0.12220460495762	0.0829157577995786	0.233220433105789	0.0682617491029655	0.0946220584205454
Klhdc10	grey	grey	-0.00539129615744533	-0.0894761053307933	-0.139418727895817	-0.0736621426197774	0.0446308674089707	0.140232567738955	0.11878714725048	0.0749520632490918	0.0910624407706278	0.0938767247730567	0.113402569328308
Gm1604a	M8	brown	0.0346406761613065	-0.0107760895739497	0.0173214845091066	0.0170545247222955	0.0183096004477217	-0.0116151356665575	-0.0408544327522383	0.0222588269611393	0.0774480366911838	-0.0319120776924559	-0.0615050254297885
Tmx3	M6	green	-0.0889257061482882	-0.0428481662106622	-0.116646915603802	-0.0434457513269259	0.0638617527785664	0.144545551742301	0.230373327745285	0.067326951215562	0.106950656148981	0.185478066257513	0.141415112412916
Dync1i2	grey	grey	-0.121767688952751	-0.0914424800343113	-0.139394694958261	-0.0429923947237486	0.082940618647837	0.191587688548033	0.171167187309066	0.0733186402562958	0.145544685661669	0.170102900808817	0.157670322218495
Mrpl52	M9	blue	-0.0794839722389307	-0.0566948907235164	-0.107956683911013	0.0187368369307826	-0.0251818653424872	0.0530787865011279	0.0521154659390511	0.014354408614253	0.00533392973936369	0.126637943738948	0.0554534013695175
Rdh10	M2	magenta	0.0114927364272087	-0.115605123991215	-0.0462790637734289	0.0256761974608868	-0.0277974899758916	0.0380330609928954	0.0465042889262461	0.0109191411481787	-0.0368990549159074	0.0520062777816099	0.0143683525946981
Itgb1	M9	blue	0.104729591359471	-0.0189165183445054	-0.136183469835338	-0.0114198258023093	-0.0484688465452499	0.0525969349181917	0.089648784407141	-0.0347881305594169	0.00342697322868947	0.210570873067888	0.156892241349357
Cpsf3	M10	red	-0.0185064209478698	-0.0112877061266699	-0.0501393989881205	-0.0704273337152327	0.0355528630298863	0.0473729752097507	0.0884193688763348	0.0176918449650656	0.0574015312466121	0.0855835325189476	0.112641481471886
Odr4	grey	grey	-0.00682180124272055	0.0447913105726033	-0.0477169877685388	-0.0252831688830268	-0.0281465286473411	0.0101865252560972	0.015547840123914	0.0151975530353989	0.0225778447171914	0.0522002799757176	0.0745419824231073
Sptssa	M9	blue	-0.0764823399659134	0.00362444426315953	-0.0379819644315789	-0.041825286083578	0.0519759008192971	0.0604040115860874	0.029265990086843	0.0244948528677919	0.0414747900352933	0.0981989655115307	0.0464647039923823
Ralgps1	M7	turquoise	-0.0710441640459685	-0.0847023334053802	-0.0930795722043405	-0.0429647016601243	0.00799273830917039	0.0513808127370077	0.0243411918182289	0.132369853213401	0.0325419460399596	0.044989373217213	0.0669431330808105
Zcchc17	M9	blue	-0.0661557861016654	-0.00176379091849879	-0.0177207334336562	-0.0235243152932041	0.0693647096368479	0.0672407098357869	0.0485781114908768	-0.0140833206526635	0.0279012086581935	0.12902148519608	0.0254195950225457
Iglc1	grey	grey	0.00439060034166884	-0.0441160520718973	-0.000288066471570783	-0.0402116047537852	-0.00237548770131319	0.0646703242060855	-0.00413827708839715	0.0645257695674671	0.068578434096685	-0.00490436221610666	-0.00151060403325488
Txndc9	M1	yellow	-0.0448395008680703	-0.0258989342908902	-0.0748776303292766	-0.0514931442183654	0.0296457172338397	0.0504276665398215	0.0767236191028908	-0.00104809511323806	0.0385567531497653	0.079345989951946	0.0732050907740043
Tmf1	M10	red	0.0105646716873693	-0.0225559668611812	-0.0605256400532349	-0.0230256949615255	0.0409419230299273	0.114637097268678	0.103378873320595	0.0304309444076922	0.0166403164594542	0.125557410485962	0.1048738914591
Twistnb	M9	blue	0.00889649122577849	-0.100349925184803	-0.118700862368679	-0.0620749238050138	0.0468740501033363	0.0787524291388315	0.0259852749022587	0.0180005301526532	-0.00602422340047005	0.121313459294738	0.069129994027312
Pram1	M7	turquoise	-0.189741715583214	-0.0949204111233374	-0.135986706042199	-0.0822293848313078	0.0574261905941612	0.238125119203082	0.176142714228616	0.166962106495195	0.121592705422374	0.123835441935648	0.114129646690404
Ndufb6	grey	grey	-0.101460361684638	-0.0779886065674253	-0.0744071585961139	-0.0352264430620042	0.0715863247723917	0.121297969319456	0.0880447184463031	-0.00275116131620662	0.0957020271676225	0.150164585201477	0.137851014988818
Ttc39b	M8	brown	0.0615577834428234	-0.0269108606290707	-0.105955934583389	-0.0669546789787793	0.0414835248921392	0.0317632128225214	0.0738534917643913	0.031420505667475	0.120955920675534	0.0919419794162845	0.057220270943462
Itgb2	M2	magenta	-0.222195749236785	-0.28273151867939	-0.177523308026754	-0.168162433445165	0.160011052268174	0.313211792979934	0.254605790798472	0.106379714196631	0.25241565082331	0.241776765654049	0.216486412673326
Serbp1	M9	blue	-0.0372120798396899	-0.00790840265481599	-0.100474375997068	-0.0518573784286083	0.0322830642039738	0.101733111596236	0.105832044868101	0.0262058208758627	0.0377143264938935	0.206069455419157	0.0767566542034085
Rgs2	grey	grey	0.0137884629581569	-0.0935452185493743	-0.143248417175543	-0.0686048455784986	0.0400517171515337	0.225871429817771	0.134398865516897	0.125076350489936	0.128226531167316	0.131400322930478	0.0814138473329699
Ino80d	M7	turquoise	-0.0604505878240299	-0.0470816064657799	-0.0912550054649945	-0.040174895009403	0.0222580400181884	0.120546663620371	0.12317091860014	0.114374017956435	0.0615372111498014	0.0839309982391489	0.0766765035395441
Exosc3	M6	green	-0.109911319057789	-0.032396045163811	-0.0370719571591822	-0.037986851719841	0.0480396453544332	0.102193346343888	0.0637555575625527	0.0237065848437681	0.0379435874498321	0.015001964090997	0.000374897143312972
Lyar	M9	blue	0.0301044413403405	-0.0108691397445525	-0.049796931712684	0.0140621031216205	0.00705082538615526	0.0468284515896651	0.0261327324091294	-0.0263182028441336	-0.0113731613889522	0.13293744185595	0.0782249184993563
1110032A03Rik	grey	grey	0.0333515324773408	-0.0597147894038825	-0.0786125320384836	-0.0472881182667679	0.0364716695324949	0.052762130394732	0.0311535613334384	-0.0369321463167693	0.0236240357423008	0.00858867926966826	-0.00388213720299232
Gm20492	M7	turquoise	0.00458161857048074	-0.0689143761095699	-0.00546872732477189	-0.0277470327843557	-0.0669563233095084	0.05965516911119	0.0579854252180863	0.0782198161800827	0.0608641178761873	0.0516274129060813	0.0187325056467115
Utp18	M10	red	0.0571314913494121	0.0315881976725268	-0.0511220575355673	-0.0189901381202258	-0.0286119558178945	-0.00721047502181367	0.0661352865247221	-0.0176350070421427	-0.0188760301238842	0.0645025667900625	0.0861899954736482
Ly6g5b	M8	brown	-0.143087786720657	-0.0626140780693015	-0.00270082759730733	0.00117418845085668	0.0279745249637288	0.129675695106738	0.0735487012407299	-0.00083005186433154	0.0369974594590646	0.0808276049914051	0.0349678285118851
Ammecr1	grey	grey	-0.0527093934849002	-0.0284348964294532	-0.0347022437587318	-0.0238683705516939	0.0189332599890777	0.0794799071739288	0.0666584320781949	0.002488176033994	0.0766750482467041	0.0761004538450638	0.0463608598888696
Catip	grey	grey	-0.0059530745006678	0.00249118044323354	0.000831126622470835	-0.00171764691901091	-0.0165321072962665	0.0307264705391212	-0.0270942259111417	0.00572963714005229	-0.00946876113428412	0.00993230222955145	-0.00235526346113025
Tlr1	grey	grey	0.00345754227678916	0.0388066263667167	-0.0416180128877748	0.0154656130714808	0.00979803212820457	0.0511356664821629	0.0362897904127223	0.0265527608980317	-0.0147116915718986	0.0459517583606912	0.0777761133594226
Sh3bp5l	grey	grey	-0.0302413511748553	-0.0577799429605601	-0.0148103456300002	-0.0313421282136675	0.00972320714982097	0.0587173567733981	0.0618162420537332	-0.0112076845656949	0.0654157847803372	0.0815601324227642	0.0262487685308797
Luc7l3	M9	blue	-0.0241944219218431	-0.069519568247504	-0.0831186294785459	-0.0271137480583597	0.0374013327052139	0.105487086982946	0.0620272508825981	0.019815091565643	0.044738434330977	0.160402859671006	0.0807740589238357
Zfhx3	grey	grey	-0.108417531293922	-0.091368255726201	-0.136821005271994	-0.078081163512505	0.0564321150435966	0.112937329568165	0.118165644013804	0.0953652658079115	0.178064535115365	0.142646886987748	0.103316486783553
Ptpn18	grey	grey	-0.132889901831093	-0.0819672835413132	-0.167839228900275	-0.0744998445517618	0.0880334037337199	0.17833053910259	0.168848841591217	0.108501307811658	0.127267639591248	0.187656437472321	0.1084141261626
Rilpl2	M1	yellow	0.0775592806781712	-0.0672606748521618	-0.0853874461522522	-0.0466099832468577	0.0324839543262971	0.102076707369201	0.104290186847099	0.0394956816769859	0.144568036131779	0.110266244121564	0.109797377969321
Chil1	M7	turquoise	-0.195947362792806	-0.13832440612161	-0.292310605431023	-0.189341148546194	0.103519675009902	0.343998744493394	0.224685060297158	0.422685399702288	0.164472347541008	0.25122659093662	0.235084577906833
Mbnl1	M9	blue	-0.084027218107987	-0.0975187031809629	-0.080015885476782	-0.0727435272213748	0.0762454324606098	0.163350696749667	0.108081610039295	-0.00100150370270152	0.0804552102091644	0.196154768817782	0.12300917976284
Vdac2	grey	grey	-0.228562212823916	-0.111918307285011	-0.1986293215973	-0.0928950273032024	0.0865651937977383	0.275160566766051	0.23311019947819	0.13538727796892	0.198172165791697	0.274481852982316	0.206921138655241
Rcsd1	M7	turquoise	-0.196594437865492	-0.110659041874415	-0.118984085059915	-0.109412204523315	0.116873422426405	0.263398224559477	0.174286160724642	0.143565750587562	0.12995325565115	0.148406142747303	0.140297536691055
Wdr83os	M8	brown	-0.135315146173956	-0.067789708714026	-0.100721675283106	-0.0634397868894157	0.110615830110478	0.165348632787111	0.119860309691122	0.101259154959852	0.203047437249683	0.161119322241013	0.149584392694186
Itgb2l	M7	turquoise	-0.176421286342083	-0.062899547808216	-0.037616308793544	-0.0165998612138453	0.0687193130540746	0.150381486700824	0.13486599040307	0.0029900310327229	0.0986147812922969	0.136025851975536	0.122598684678173
Evi5	M9	blue	-0.0453888770115956	0.00103601001978002	-0.0788763574598537	-0.0771829636598453	-0.0158591582716475	0.0413094427205088	0.0816862751656283	0.0132148661770657	-0.000111972402136979	0.0918914678512417	0.0725500495944739
Fstl3	grey	grey	-0.0603798818525252	-0.0603475260443254	-0.00950823346532403	-0.0200250273668103	0.0415968020292034	0.0504333034626684	0.0531129522428119	0.0285851922796597	0.0333856424843863	0.0200504131463193	0.0347775067292892
Fam172a	grey	grey	-0.0671454962795058	-0.0517393899332063	-0.0518226768803531	-0.0505251101383902	-0.00930192897832932	0.0669204186042068	0.0229171539423584	0.0331522116775538	0.0385490119944425	0.00373899930469108	0.0358566183523993
Itga5	grey	grey	0.0780828646018976	0.0407733505462266	0.00594141107707116	-0.0156524728357253	-0.024711456877193	-0.0728715366990537	0.0391087240515806	-0.0137565039754886	0.0123702804886726	0.00788502098198831	-0.0051800020851543
Bet1l	M9	blue	-0.0327889745833649	-0.0109752351854053	-0.0675477005181026	-0.00680230996544297	0.0149861705370104	0.0634210344334257	0.0448556326892072	0.00893408301615953	0.0555438120711289	0.124171470055131	0.0790680353963116
Larp7	M7	turquoise	-0.0914466246903446	-0.0354098730223065	-0.0393274733342755	-0.00545921255242564	0.00322291697423631	0.0596558353005782	0.129265902099582	0.0876376123277293	0.124633739077438	0.0724651986982095	0.0405471973087561
Simc1	grey	grey	0.0544430778510865	-0.0354102579401105	0.000695476370689973	0.000586447197525111	-0.0235157855244352	0.010611873103714	0.0490120100839261	-0.00774160434108583	0.0306106551582621	0.0119844071109384	-0.0232501991518009
Acadl	M3	black	-0.0881782964354293	-0.0237120371546939	-0.00216626533529591	-0.00730768784720163	0.0461541242801002	0.111146703705938	0.0750143389050885	0.00214498892152373	0.0292635168802694	0.0722033125207562	0.0211422325903006
Snapin	M8	brown	-0.0806285030859244	-0.0348719842373853	0.00680213512158092	-0.0081689670563123	-0.0196345003450623	0.0809652299927371	0.0786938726802923	0.00273707731196391	0.0204788221051964	0.0699829064560585	0.0528340958619441
Ufl1	grey	grey	-0.0716196164802393	-0.0180604113311459	0.0012966293365793	0.00280922967265855	-0.0701066966482505	0.0189201734151189	0.0336474161548445	-0.00148148566268851	0.0196146042769234	0.0247833948551883	0.0374293610973379
Manea	M8	brown	-0.101864048007937	0.0192140486122825	0.0118191925685484	0.024399740845307	0.0616048576510665	0.071421277304362	0.0139989817730689	-0.00886479068573309	0.0211963874590113	0.0334668997599023	0.0282466258858651
Klhl7	M7	turquoise	-0.0119939544394833	0.00492623089319188	-0.0435582326896819	-0.0251855587767553	0.0204180624016553	-0.00857070342033067	-0.00950446867460509	0.0502551488961127	0.0183330861122074	0.0363033089804111	0.0179561183030075
Gipc1	M7	turquoise	-0.0341536225588149	-0.0665419781161764	-0.0904533900783907	-0.0695500106607081	0.0232385732707864	0.067537586505595	0.0782580918147797	0.0676038246202995	0.101605389709078	0.0737155036954257	0.0246585343746197
Tppp3	M1	yellow	0.0703634454104496	-0.0120711197691301	-0.0187375417019714	-0.0542697158029803	-0.0113088596273048	0.0462287170354201	0.0391887640827904	-0.0247318871752438	0.055396956851589	0.00384998184724503	0.0354349469692411
Prdm1	grey	grey	0.0768304089323051	-0.014024476608282	-0.00658913234642297	-0.024123111668015	0.0155958981193462	-0.0108845969905754	0.00224292572048936	0.000860553838691584	0.0227332324274892	0.00108031099917243	0.0312425753899799
Gm11992	M5	purple	-0.0710924794250856	0.0245023165594965	-0.00487903195874376	-0.0586619203848995	0.0270385248650374	0.0851769712694988	0.0369874732065787	0.0621367145283269	0.0123135644198528	0.0466003935700814	0.0184754332517593
Ankrd40	M4	pink	-0.072918609576635	-0.0826955713917778	-0.0310474747119928	-0.0557117733569982	0.0733177462229972	0.0781567495880849	0.0635386737312327	-0.00416234416416859	0.0458565691729848	0.0953392882516887	0.0583839862378265
Crtac1	M7	turquoise	-0.0999315844916537	-0.068412541976026	-0.0940780526774706	-0.0938255800164292	0.068105635777652	0.0820222422737856	0.0523549821265038	0.0464377995772975	0.0426726862336504	0.0264953237624003	0.0508594200624724
Nudt5	M1	yellow	-0.0527307305268435	0.00150228798550146	0.00392897568996168	0.0405375652974148	0.0246197560306846	0.00590890650639377	-0.00781107543872667	-0.023975858801934	-0.0279697271794267	0.0263036449067143	-0.01567361328794
Ckap5	M3	black	-0.0461493704447435	-0.0181072386880911	0.0270714302653363	-0.0403695564607586	0.0785149348309937	0.0422316815146315	-0.0306197176817752	0.018619292037273	0.0367451868666897	0.000323608905726557	0.010548146975953
Naa15	M6	green	-0.0270984072299696	0.00465812866557427	-0.00504374803668277	-0.0283221834440692	0.055072047638211	0.0352829234879041	0.052841147314664	-0.046730603046897	0.0263258438153359	0.0253543456287065	0.0393776977006678
5031434O11Rik	grey	grey	0.0331775429041651	-0.0511960878875638	-0.0323564820939062	0.0205475428004925	0.00358814234557725	-0.00510658836306769	0.0769509471335436	0.00827114539596373	-0.00711127334201788	0.0518552759803825	-0.00130166121782944
Bola1	M10	red	0.0638879459202468	-0.0711058188661707	-0.0360285811865843	-0.021247295066491	0.019354864036242	0.0355234343311763	0.00270837864777047	-0.0126481808809062	-0.0154610161360565	0.084345571364375	0.0353704309794098
Pip4p2	M7	turquoise	-0.0817552300731809	-0.0222151905708391	-0.0175843114392998	-0.0390023029829469	0.0709687219401987	0.108473680181947	0.100994104777269	0.0237694144631903	0.0426255943196254	0.0714568950471032	0.0372198511504619
Orc3	M5	purple	-0.0403205925289091	0.0380260917975264	-0.0338418576283519	-0.0185982637808965	-0.0316532892460908	0.0788496676036667	0.0311844749730316	0.0315236665815581	-0.00451356562016841	0.0602404880654489	0.0619440584632873
Ssbp3	M2	magenta	0.0442603449447238	0.0439566443644009	0.00431584163998774	0.0208195197897779	-0.0513550610517947	0.0145269769822851	-0.0163348819807144	-0.0121689620642633	-0.0183021916697903	0.0368995742471266	0.0744031018785923
Nfxl1	grey	grey	0.013390352534683	0.0161222843702235	0.0124854929833391	-0.0239473284094127	-0.00587430308577029	0.0152167674729307	-0.0494037971936628	-0.00404991530693216	0.00929935315617947	0.0162939461041505	0.0309231666286049
Gm17092	M5	purple	-0.0701598168668908	-0.0235642858111724	-0.0676424450730633	-0.00572878757773646	0.054408001378989	0.121174800536689	0.0490791789778481	0.0320224728063372	0.0240835667537614	0.071029409764045	0.0415666181197315
Nupr1l	M10	red	0.0618497725268418	-0.0442451217974179	0.0309458218849024	-0.0427037786172326	-0.0046469060247745	-0.0183338035340608	-0.00603338318226226	-0.0606409240759757	-0.0493525720521798	0.0299002191100661	0.0122387042280737
Uspl1	M10	red	-0.0260972889726362	0.0117113217169636	-0.0202415752401671	-0.0155921935681409	0.0309161782909558	0.0768007227728988	0.0681810249004067	-0.0244959882095448	-0.0438874284009964	0.0905886868815229	0.0626502646310652
Gimap6	grey	grey	0.00159458308048416	-0.00650636046230164	0.0169794232520041	-7.73673408041927e-05	0.0348062919724381	0.0395516802444312	0.00445957527042104	-0.00756353176446402	0.0835422836038787	-0.00944728821318209	-0.00840909841898414
Pde6h	M1	yellow	0.0794819427293978	0.0285629900415312	0.00809468509212774	-0.0162142985605163	0.0270561465154814	0.04759855800114	-0.0255578425446263	-0.0235451547034658	0.00686859207023574	0.0139301523804052	-0.0270774317019435
Phldb3	grey	grey	-0.0215120735332356	-0.0554119978616416	-0.0558046238072338	-0.0287297229133227	-0.0123472905818752	0.0245792653571491	0.0447976629370561	0.0510144993966625	0.0697235389388542	0.0744818639959167	0.0845567135565245
Tmem126b	M9	blue	0.0145456707342027	0.00244138468608561	-0.0481739422009055	-0.0312071748954861	-0.0164324386136776	0.014773423922363	0.0319809791475695	0.0551362384185266	-0.0117207109130105	0.0647827836371771	-0.0257150204309702
Ccl25	M6	green	0.0142230668228161	-0.0327972824071004	-0.0542259391298235	0.00908881400543294	0.0317221324315138	-0.0275647026822527	0.0573164046808454	-0.0310568460648403	0.0597148731415595	0.0467558791301347	0.0533361983311713
2810004N23Rik	grey	grey	-0.0371455441664886	-0.0222563551753874	-0.0342735184835662	-0.00595782987162181	-0.0284102329586134	0.0641344482810428	0.0316661156703614	0.0472856620541056	0.0383762306160084	0.0397559851726286	0.0295628580744698
Nfrkb	M10	red	-0.0457488367403598	-0.0322576796112866	-0.0106890333074332	-0.0028991027904333	0.0160722932656402	0.0617455484794502	0.0780204095177983	0.00753194478735343	0.0394972661362706	0.0588805094483615	0.0440170100473852
Wdr61	M9	blue	-0.0265424466743044	-0.0562058905549586	-0.0291056922302521	-0.0318186220954941	-0.0553896763073319	0.0470973639607544	0.0703361684036416	-0.031094935113044	0.0206537132221265	0.0747206139134074	0.0746890426187899
Gm48855	grey	grey	-0.013829087426939	-0.0424905562305044	-0.127294274287641	0.0161715119138848	-0.0270540637484987	-0.00511816807180579	0.0288000863095683	0.0618232982471541	0.0594459681041981	0.0399301148627837	0.0758070438007785
4833445I07Rik	M9	blue	0.0380530842324806	-0.0547873522141257	-0.0304155065450849	0.0200578352984879	-0.0183697280688676	0.0622186043104197	-0.0115933516941058	-0.00230780270552863	-0.0106462846506088	0.0489554105951175	0.12594653281105
Cuedc1	M5	purple	0.000817204541207273	-0.0158330231135224	0.00646631499202419	0.0148128460977714	-0.00948637061414555	0.0609350529774436	0.0138050864683196	0.0634554559774603	0.0119132539916169	-0.00747891991383256	-0.0662496341451971
Nt5c	M6	green	-0.0987756791933942	-0.0125723038470894	-0.0150231404579544	-0.0193247128680471	0.0220785099489958	0.0689962018683424	0.0178586343660235	-0.0111741511712344	0.0438906805324261	0.027952757570722	0.0396320498035229
Pnma1	M1	yellow	0.0562185755084052	0.0028869067793973	-0.00273072500705886	-0.015081136294474	-0.0098796150360586	-0.0134010531145381	0.0209706531352871	-0.00777213415064093	0.0150519140319221	0.0353899076032995	0.00889073315260133
Exoc3l4	M9	blue	0.0598580283852466	-0.0319562369394186	0.0257888863635585	-0.0197971370998746	-0.0113519419520302	0.0230192995621478	-0.0318321640032443	-0.0371395903448762	-0.00473634378482889	0.0437584802356179	0.0263603018717103
Bicd2	M4	pink	0.0237856991517481	0.00567208456776388	0.0101816940255954	-0.00563233230485537	0.0148174776948116	0.0198267482094668	0.0167613633531338	-0.00774954893341521	0.00607575379735649	0.0456188164038166	0.0188970750040978
Mrps36	M6	green	-0.030609938710852	-0.0146700613554491	-0.0452241728889646	-0.0138829068422589	0.0570245862018929	0.0357425251425127	0.0537288138122545	0.019862161705971	0.0587877851014435	0.0601033453470554	0.0498854705274075
2810402E24Rik	M5	purple	-0.0495505509942991	-0.0109764763026321	-0.0282166480846196	-0.0394669306613739	-0.080514374939725	0.0534525123964614	0.0628008426451685	0.00481590041545741	-0.0576225751679466	0.0486744070754623	0.0562329871837773
Spryd7	M4	pink	-0.00769603647923458	0.0252372341850021	0.00312267128125192	-0.0209083391242022	-0.0666116200248703	-0.0032270498820975	0.0310573082845746	0.00314777292102973	-0.0147441246041584	0.0246812673547711	-0.0116891256669785
Zbtb11os1	M10	red	-0.0183248113232827	0.0116064585040073	-0.0391808187923968	-0.00720599151960054	0.0578628623991553	0.0345816786944872	0.015441661137269	0.0103777117923389	0.00308746656729894	0.035830193237755	0.0160318709114192
Mbd1	grey	grey	-0.0351389631887333	0.00482506800999705	-0.0316371009016103	0.0102908759252383	0.00607253700749366	0.0157351319244619	0.0388808556312949	0.0113666914968524	0.0277360210449253	0.0349022306117359	0.00444082884131024
Men1	M6	green	-0.0822251906698629	-0.0676523776896393	-0.0554202496998618	-0.0127469906336199	0.034326824746762	0.0782605884511811	0.062517908093505	0.00405637979838355	0.0458414152673224	0.0915216964118726	0.0584629135076039
Swap70	M2	magenta	0.0313594993015897	-0.0172636437660943	-0.0643060557668731	-0.0251742771748147	-0.013072416005472	0.0609707256015285	0.00965504390553267	0.0687086506483802	0.0378164186699182	0.0201013298827471	-0.0273774882880841
Ralbp1	M9	blue	-0.0758826319239586	-0.130431905018062	-0.106058284568996	-0.0762374621512915	0.0607359449322977	0.250500959178504	0.216527049186456	0.0651368191453295	0.12120753119165	0.245880980574849	0.116319204395929
Gpr141	M1	yellow	-0.0432089711874907	-0.070829720631796	-0.033333477777973	-0.0574345615025937	0.0798534738590517	0.144072516553543	0.106472439872439	-0.0381294028045945	0.081020662913348	0.126659850705494	0.102140882007014
Trim25	grey	grey	-0.0435396127891823	-0.0433227576472494	-0.128593033492756	-0.0910289433103191	-0.0162680116188232	0.12403713938084	0.0902223972462457	0.113670459155365	0.0507204699602899	0.101550032672976	0.103824259896268
Hmox1	grey	grey	-0.0545074864917986	-0.0370451510886432	-0.167412109957525	-0.0917554945451413	0.013946777218876	0.163213123887883	0.110906207062914	0.100008602962508	0.0803039634548274	0.138895619480288	0.0671581834629602
Irs2	M2	magenta	0.0493535904704591	-0.122275715704899	-0.0715245376646468	-0.00041967627451451	0.0311330552576514	0.0400445093733606	0.0812094371399218	0.00367940025783697	0.0607730932036095	0.0640675581365222	0.0262437200713136
Gpd2	grey	grey	-0.0347430522521807	0.0243362259011397	-0.10045967449125	-0.046624883227496	0.00240832668215468	0.0908231060766218	0.0609404273442977	0.0499721535464987	0.0355740165125125	0.056750818328321	0.013017093261804
Birc2	M1	yellow	0.118004134495492	-0.0618871865089335	-0.0500231015227606	0.00767092223967342	0.0459792722244636	0.0969489475191647	0.0725437219923977	-0.00886723485959712	0.0350499540013783	0.0513304769457448	0.0380476572251596
Kmt2a	M2	magenta	0.0248171929176073	-0.069851079749881	-0.119246286856158	-0.0620167128347858	0.0692654492686636	0.105226439417823	0.0728378170137467	0.0510270775301262	0.0900134041872104	0.0690123000443445	0.03846100138616
Cotl1	M7	turquoise	-0.167141667945374	-0.18894049709605	-0.311271671405842	-0.156439405590652	0.0720980970241727	0.272456512312863	0.20785503284783	0.406456467606267	0.260147919940328	0.19242119667111	0.20723437456778
Dgat2	M7	turquoise	-0.0526941313218137	-0.0896331230381824	-0.230294656661729	-0.0915321639538725	0.0642981773239614	0.19587002821978	0.161155403441028	0.222485098665834	0.155057407448858	0.156550347281701	0.176044597572557
Ppp2r5e	grey	grey	-0.0612028764536751	-0.0544489054304898	-0.0788993841969435	-0.0498878546879506	0.0968816709571432	0.18198135610309	0.120833302437672	0.0220938332579863	0.0651700337915483	0.14782505326437	0.150037999239593
Rsbn1	M6	green	0.0616957210919775	-0.0331777457505757	-0.0601679138709186	-0.0120804085564997	-0.0115883277376486	0.0575224156583252	0.105498168505263	-0.0129480989274819	0.0608201493468787	0.0470340677679976	0.0717620344452422
Ndufa13	grey	grey	-0.216117981297409	-0.126841812767704	-0.159150647217177	-0.117268644147836	0.141764673598272	0.256821997230746	0.202915925909356	0.102504554702533	0.15913318443468	0.200675209818033	0.185768595720937
Sirt1	grey	grey	0.0735640640338171	-0.0618464264798428	-0.0259674641633443	-0.035017799788674	0.0684127449521248	0.0262141771495814	0.0269940388214743	-0.00130556526658141	0.0463209707681792	0.0950739976681129	0.114736905774433
Mga	M1	yellow	0.0462583132783046	0.00327854056306299	0.00343461757523953	-0.00638486478672273	-0.0239588179327471	-0.0115744477576066	0.0443618364812818	-0.0255899471013595	-0.0475378800100902	0.0446040778798458	0.0363118183768617
E2f2	M7	turquoise	-0.117385991439076	-0.116396640534573	-0.0530548774575148	-0.0809636227340239	0.070620461972163	0.178380468867474	0.105740875959094	0.112280091789632	0.117231953877155	0.0606471953488234	0.0567292006371267
Eno1	M7	turquoise	-0.222500618901082	-0.144673060459484	-0.17641718039343	-0.152538295022898	0.0939726917461135	0.269480309445999	0.214264675968618	0.175839701380309	0.180316314536759	0.225506954121548	0.174710123261626
Slc31a1	M10	red	-0.0112213024502453	-0.00974111408620503	-0.0798263437246069	-0.0270846486807188	0.00797044242748321	0.0559800996699981	0.0861455888945035	0.0206399497960052	0.0678971854871485	0.13549057694075	0.096580084454082
Ndufb11	M7	turquoise	-0.21458496314687	-0.120057592021735	-0.137082307084162	-0.132600737115981	0.101122347399177	0.233344347816387	0.187846964116398	0.152853875716883	0.173238212895039	0.161374837706357	0.134951118611728
Msl2	M1	yellow	0.106429862811128	-0.0605526667144065	-0.143516069481465	-0.0355544744231642	-0.000843796866820582	0.009754832055099	0.0402920448056757	0.0852155687369138	0.144436697167414	0.0265702612669808	0.0079644639844267
Zfp644	M6	green	-0.0634879120905934	-0.0336783437281582	-0.115246861997903	-0.0307879720883728	0.0696364586692178	0.125977580246777	0.156308510606529	0.0626512004522397	0.0663340984139097	0.118297962899792	0.0768133386310471
Zfp868	M4	pink	-0.0664171103599842	-0.0421925947813151	-0.0174861508806056	0.00655982046533238	0.037870602977053	0.0584935981724759	0.0185017653952763	-0.00849876797467862	0.0302518228534737	0.0308189624706663	0.0563288831595828
Xpc	grey	grey	-0.136545123809364	-0.0887398675925851	-0.150779963114158	-0.146517153498231	0.0318261979033542	0.203245318689608	0.11304810316947	0.142592065676265	0.113886775463014	0.101932349738321	0.102533610726021
Tatdn2	M8	brown	-0.0151378867429983	-0.0065411116128085	-0.0402749686461482	-0.018032232641015	0.0159149441614088	0.00377759809656905	0.0558418474348007	-0.0178320732115355	0.0828963607431582	0.0558670386178304	0.0727878751146045
Wdr44	M3	black	-0.0495674573088665	-0.0486099297546831	-0.0818981255739885	-0.168024433579058	0.000218313909639742	0.0930975041565301	0.0672533591706982	0.0655605684022599	0.0682340525163838	0.0667477591194682	0.0519544814216105
Gm26756	M1	yellow	0.0474141392259678	-0.00017168917356044	-0.0126985120654063	0.0351296600671114	0.0441566436544611	-0.00713047886081063	0.0119807166922915	0.0370873055226801	0.0551976309756908	0.026951549344237	0.0465527516332652
Lfng	M1	yellow	0.15459706039001	-0.0240860153078698	-0.0950842294031751	-0.0507033588661824	0.0166814118312296	0.0447793866417872	0.00194026879579607	0.00437812908227515	-0.00139232006428085	0.077930065964156	0.0722669226482568
Mcm3	grey	grey	-0.0424254673628731	0.00783246563932894	0.00110240459927341	0.00674854294785104	-0.0114400937344259	-0.000876417113662535	-0.00557995864611942	-0.00203160491189367	-0.00510074703566023	-0.00730617260400635	-0.00565693352066481
Rpl10	M9	blue	-0.139764250989173	-0.146150184063707	-0.163090630218338	-0.119159779458904	0.122374473371319	0.228815403464326	0.196403541453054	0.0712217556542955	0.162601287657276	0.288160282469094	0.190690710527203
Hacd4	M7	turquoise	-0.214717331584683	-0.132263936304153	-0.26676804516445	-0.187303494815476	0.06877084167715	0.27454711799498	0.1471522860955	0.272485401888481	0.18419682979282	0.132638637633042	0.152430295688202
Zmym5	grey	grey	-0.0397003187887494	-0.100180894937627	-0.123284193456606	-0.043626070726167	0.0542313203434842	0.0962587808392668	0.14161922681174	0.0631458214166768	0.0760805239387395	0.130155057139961	0.107780233326809
Gngt2	M1	yellow	0.268255867837601	-0.0169023996900909	-0.115453896520173	-0.0042026131796449	0.00827945714472993	0.0024465269031624	0.0724815605385698	-0.084888147331058	0.0105310485997213	0.24353136315526	0.13334035135407
Dnajb11	M6	green	-0.0749633109690718	-0.0560580737035385	-0.0478179807472672	-0.027872134332897	0.0628917898923147	0.166255727833419	0.100360135315613	0.0319423964985093	0.0306272314353758	0.0852924985454036	0.0532333766980797
Prpf40a	M9	blue	0.000652821592543551	-0.016305370981327	-0.101696834443072	-0.0776627489939807	0.0397241283959746	0.147781417194018	0.11571253093644	0.0758042712427114	0.106345073072277	0.188172928832899	0.0660819264240679
Cyfip2	grey	grey	-0.175525215048423	-0.116488753967485	-0.149522568510661	-0.124917032209838	0.127249748912826	0.275643140229418	0.222121824452874	0.0929701634822984	0.172000050024128	0.231011226960411	0.161078767959242
Clec2d	M1	yellow	0.14425662551283	-0.069250291854714	-0.0455107192428003	0.00466962669520418	0.0552009132775343	0.107557630188492	0.045821909359261	-0.0278987720942137	-0.0164893465828334	0.0903290656979111	0.0761642359239203
Psme2	grey	grey	-0.172345481196406	-0.10025989815422	-0.138731195956279	-0.115744875202574	0.122741656231765	0.224583063882082	0.173388809224534	0.0856260860941397	0.155632113995699	0.167863154015172	0.100987554228462
Cebpz	grey	grey	-0.074783778502069	-0.080974261156009	-0.132933728889141	-0.0715430700957673	0.0237893166323738	0.118453518190855	0.146620479751646	0.103380595667304	0.130050607787759	0.182026103947227	0.111845794209539
Zfp292	grey	grey	-0.0334751071962638	-0.0153521192219551	-0.151672758030027	-0.0719103352220158	0.0437703119915121	0.120460786843733	0.0823190181094371	0.0835243711712393	0.0172729804997981	0.122636612590368	0.0463766618914763
Pex13	grey	grey	-0.0147539685267547	-0.0326827511419885	-0.0446165446955833	-0.0185685211173502	-0.0271174163814192	0.0288715940754329	0.0636432296980352	0.0103230855128921	0.059785870725647	0.0473516337377748	0.0307931616183643
Rhoc	M7	turquoise	-0.11270317042825	-0.0617367329504493	-0.105431449540784	-0.0716167223031667	-0.00136829656145667	0.0879136758809632	0.0537555006562704	0.147298079494594	0.113428081417136	0.0129902728766948	0.0797666769579641
Arpc2	M7	turquoise	-0.0881294400040325	-0.134888779080884	-0.364074767218469	-0.210743251948367	0.0369450838449196	0.22039267345531	0.168362790661589	0.416259940519774	0.184172964626551	0.166569062527233	0.136082605609584
Tnfsf14	M1	yellow	0.123182056601777	-0.00436230313453388	-0.0161374301229899	0.0393326716415503	-0.0169531340113467	0.0030078353883606	0.025067521731388	-0.0301290357674727	0.0304701621199253	0.00655856626325791	0.0332852876179464
Slc26a2	M10	red	0.109262222659752	-0.00321410827256063	-0.0828520521327356	0.0123745739867921	0.0449574649811727	0.0182679024005296	0.0236070479967394	-0.0541890752370941	0.00353620519855263	0.10496762301497	0.149187520859082
Eed	M6	green	0.0369820058598701	-0.0869699482329776	-0.131335522128749	-0.091742752297386	-6.12280446005393e-05	0.0897559519772943	0.145993808837185	0.0827007929606448	0.0787318184887026	0.185285560177031	0.117527589303238
Wfdc18	grey	grey	-0.0656028145966016	-0.0260455718302886	-0.101279481204801	-0.0549845809457639	0.026083576449973	0.0434450404471614	0.0572856151649154	0.126636273909491	-0.0113672756271422	0.0857398959915233	0.0633318171483152
Rps29	M9	blue	0.0138928038330131	-0.149953952483965	-0.286834713421437	-0.181554518001328	0.113982449895199	0.231781867518476	0.276292847987814	0.218663667885884	0.169992382235118	0.421578842085515	0.249776540268065
Nap1l1	M9	blue	0.0646221358143826	-0.100497238885353	-0.105214540954273	-0.0461950434676348	0.041511616140031	0.0796491287095532	0.0963263231949997	0.0229072967923347	0.106448862797646	0.216288265693166	0.0991560142948425
Ppp1r11	grey	grey	-0.0105818210159379	-0.068202227237081	-0.0918815994847943	-0.0105439763260817	0.0403164119260366	0.00751574071331293	0.0701916512805335	0.0587610225410754	0.0668790661069263	0.113959712750381	0.0575513468735603
Med8	M9	blue	-0.175724260377623	-0.117722651281457	-0.0948576826229124	-0.0644547856019438	0.028204114255206	0.172890258733584	0.128906539068616	0.0489476136744398	0.0759631677854279	0.16722311151741	0.117806836882986
Psmd12	grey	grey	-0.0363461556415882	-0.100533967270187	-0.0666342047006703	-0.0122704945855224	0.0607275507246451	0.132927971927995	0.10415004306652	0.0133888290885398	0.0755707086502773	0.0873318538948904	0.101192666675031
Gm11714	M7	turquoise	-0.111261512692519	-0.0655753918147416	-0.0788972159277357	-0.0690683407222849	0.00632075933418671	0.0522696032504444	0.116075365713145	0.137591232231361	0.185236239785454	0.0517135860593049	0.0753199993313139
Snx9	M1	yellow	-0.0257017176206415	-0.0945354358208048	-0.091352139586632	-0.0680654816048921	0.0648160559703803	0.126498453395621	0.0731574642132316	0.0194856276104851	0.0540754107935729	0.0826058159808613	0.0826698088769689
Rb1	M9	blue	0.0531080139765463	0.0092330625344983	-0.0746345650106258	-0.000788831698930095	-0.0199067794174516	0.0233443883498412	0.0529581779045992	-0.0299823564089642	-0.0232376106443982	0.0731560093877073	0.029114693693281
Ints6l	M9	blue	-0.0350232661341624	-0.0926282677890121	-0.111055849968807	-0.0457081747074859	-0.0211935192428815	0.168472621331636	0.105039970911073	0.0458653929656803	0.0871743862735401	0.101019594814478	0.10729445899896
Samd8	grey	grey	-0.0750021968263697	-0.0966119803828389	-0.0840434555136022	-0.0353695354180808	0.0191457320543867	0.111987418890442	0.112367892183443	0.0318396235423815	0.0682952967749166	0.122986822445109	0.0193232334137017
Dach1	M7	turquoise	-0.176014169858552	-0.105077501383486	-0.12598628475648	-0.0961714116412283	0.0998072555285686	0.171598931948132	0.140722246997399	0.0802062407840535	0.164107135284086	0.122967947224424	0.123022101191913
Adam15	M7	turquoise	-0.148918519503277	-0.143443939827241	-0.125067794496945	-0.112720530655414	0.056826547441081	0.17120580246994	0.161562583408836	0.0786961289092718	0.0991512159749982	0.1786035562003	0.13068524762864
Rala	grey	grey	-0.159699391452988	-0.134185220566387	-0.126051374660166	-0.0745740650671761	0.116337131698117	0.195413370586265	0.187431852324097	0.0716363284411243	0.134997328986521	0.178839433384399	0.1180868414133
Yaf2	M3	black	-0.173901303699396	-0.122161597147723	-0.0905937291066794	-0.208007066718664	0.0770922714608855	0.160919419889448	0.106054233472633	0.0415966398551619	0.0867105098749548	0.122148153100895	0.0914034301922739
App	M7	turquoise	-0.174636054991418	-0.148405977030826	-0.22341108050855	-0.174397506429467	0.0523639032207225	0.219819482845307	0.23908267186055	0.260514492775645	0.250559638290969	0.19597649234815	0.222637922811938
Tcp11l2	M9	blue	-0.149611548588083	-0.126916860130769	-0.127177456538515	-0.0660202748508962	0.104082164235657	0.269833570298217	0.226924328046651	0.0923724185165016	0.134141184644	0.287333819424792	0.185562025518604
Csnk2a1	M9	blue	-0.100990305565118	-0.072088305525014	-0.110878495467652	-0.0336976690110434	0.0991123002301667	0.179559395861545	0.126820074333766	0.0470009999606033	0.0482727941542675	0.218495544319234	0.0866224925137214
Tcirg1	grey	grey	-0.0533365535333039	-0.0221254060727422	-0.0377441674635112	-0.0497163655421661	0.00517528471956057	0.0711629982465876	0.096503042874391	0.0332089798574478	0.0456889565936462	0.058468509878316	0.0226290611699501
Ythdf2	M10	red	0.0332511559840466	0.0200044509136615	-0.0487326024409236	0.0439479692725931	0.0103672626850912	0.0230188983807357	0.0114939145014559	-0.0227036460903568	0.0122905113456149	0.0931016475045084	0.1226711287046
Rassf4	M4	pink	0.0684905352490408	-0.0090973025920141	-0.046981764939856	-0.0649906674190872	-0.0693216927074788	-0.0157400168753553	0.034721466231026	0.0377690104100756	-0.0141017748487061	0.0703717104910884	-0.00112004680367121
Cstdc6	M7	turquoise	-0.0846180442701291	-0.0872127509465715	-0.0794255703680434	-0.0843658395129944	0.00761148709441473	0.0621610687314535	0.115013504411547	0.0845416151318293	0.0467291505695985	0.0746563740884895	0.0895311153882272
Armcx5	M6	green	-0.022976686201872	-0.00815563817365908	-0.0258899497308182	-0.00300248841108604	0.022309653146627	0.0286558990558324	0.067530895647575	0.0358335824781006	0.0516907555962632	0.0309814516425935	0.0122923105030873
Rbm43	M2	magenta	-0.0337275251780664	-0.0450495259437431	-0.00333335619165729	-0.00972583392142978	-0.0058980402520271	0.039343574928738	0.0461578660682179	0.0305973428852817	0.0353220531037908	0.0209096334680903	0.0169784985289341
BC028528	grey	grey	-0.0749079073358779	-0.0313461989298812	-0.0873097049049259	-0.0324051506304159	0.00946777820298786	0.12123491630364	0.164023124173115	0.0271915457890844	0.116522406830676	0.0924265219099007	0.0567290676911846
Mcam	M7	turquoise	-0.155455487952855	-0.117526090807923	-0.173119926440744	-0.100364633839372	0.124991353095223	0.179268170021246	0.170905417278576	0.175935205851947	0.186675096123147	0.141496630703008	0.129649041950743
Ddx50	grey	grey	-0.0897086626190344	-0.0742108160852432	-0.112750145726471	-0.0760065229657614	0.0931180509382138	0.116517151208404	0.126706610846797	0.0379405628203833	0.139543673080727	0.148832008344906	0.0986315285531746
Gps2	M7	turquoise	-0.115668237428799	-0.0456607072705279	-0.0958939228586525	-0.0607839770455096	0.0626512224601965	0.112346522364789	0.103150708437026	0.0683162516295341	0.0640127523665011	0.0989931715033621	0.0519836202761602
Ggh	grey	grey	-0.114258662595478	-0.0946038163075935	-0.096778487127223	-0.0956346087765658	0.0480715041747801	0.137114173982737	0.117021953448582	0.0234435502039727	0.11847098737183	0.125538942472977	0.0920686006491174
Caap1	grey	grey	-0.0453437781308235	-0.059925421475139	-0.0636672411724813	-0.0950883859846413	0.00572638773264682	0.0316643813081838	0.0192623918545644	0.0687896614167066	-0.0232705528952991	0.0349145338204054	0.0204128207495557
Hnrnpr	M9	blue	-0.00933223210327314	-0.0295296022947176	-0.0637249932580903	-0.0104440464684515	0.0275789963797766	0.0126694916689903	0.0294460762939682	-0.035945072210555	-0.00414008089033336	0.112386345084776	0.0756523301388135
Mtf2	M9	blue	-0.0494573491221547	-0.0228001980025322	-0.0644461906265585	-0.0328448467940125	0.0254096898347423	0.11834967416486	0.0780679268074552	0.0498721980515428	0.0541639549641905	0.111474838854754	0.0568264377174903
Ccdc189	M7	turquoise	-0.0811360131075204	-0.0126105050561557	-0.0797125892888554	-0.0284612301805295	0.00631961505266734	0.0666669421112824	0.0774756280246296	0.0917366391684763	0.0685723464144579	0.0617871445769248	0.0507012657373191
Dock9	M7	turquoise	-0.0891365998259081	-0.15125308058724	-0.125753909801487	-0.0472572904994054	0.057143832884629	0.131236241394815	0.147411036839626	0.050142358259546	0.0837182596407444	0.1309417384644	0.12370466866292
Naa50	M1	yellow	-0.00436845893783175	-0.0145354405306979	-0.0793937861509764	-0.0145957019524611	0.0210689200993573	0.0475856856394933	0.0518282048868352	-0.0157698284282762	-0.0117671104272924	0.0888393312248489	0.0188758092280223
Plekha5	grey	grey	0.0162831739408028	-0.0177991854415776	-0.0565019616942745	-0.0579356958473293	0.0108991316612975	0.0149150775976129	0.00424291681651484	0.00875794193261407	-0.0465437538069353	0.0649936314470661	0.044163453957618
Mbd3	grey	grey	-0.0358980740041562	-0.0469684218158033	0.00861054222816838	0.00496487590041589	0.00368251954068917	0.0521786046275923	0.0571048996889771	0.00540280040946874	0.0575869738732788	0.0103805893610816	0.0317254080976874
Prss16	M3	black	-0.0578826024028367	-0.0524449213254234	-0.0870019857647377	-0.087295077764939	0.0663292413645828	0.0910260585174286	0.0431251218454187	0.0580754830980685	0.0613608066834308	0.0435201884979638	0.0299552307320362
Mlst8	M3	black	-0.154777891463703	-0.057676297097768	-0.0155406986220566	-0.0282295773369085	0.00698147692779891	0.12366752406606	0.0800482530025638	-0.00238633532076359	0.0414546709875209	0.0778458508522829	0.0627645363555859
Atl3	M7	turquoise	-0.0206827347391125	-0.0468805530729365	-0.0379752458470943	-0.0386710708057961	0.0611439136129561	0.0325714985127322	0.0510772239719216	0.0951642152671229	0.016441184485475	0.0699063775277927	0.039954003608282
Zfp451	M8	brown	-0.0358535117755015	0.0230723848473915	-0.0191377543876538	-0.0236541192855925	-0.0573856902417086	0.0318761028538524	0.0380047033790424	0.0282613653682354	0.108404654699905	0.00620588469988432	-0.00227234568944551
4930589L23Rik	grey	grey	0.0186954890689869	0.0150841039096115	0.00106933327845519	-0.0255448606199786	-0.0393274387253843	0.0452710056410422	0.00153369421030849	0.0173561116363602	0.0489711473664222	0.000494386690983948	-0.00578303650656688
Fcor	M7	turquoise	-0.121258354495732	-0.0213851115478868	-0.0310397072824337	0.0222465813929227	0.050162396220775	0.0936795814645362	0.043937875673936	0.0690034507498279	0.0282319329429419	0.0281159053029733	0.022706782720356
Gm27010	grey	grey	0.0560938162626511	-0.00724254397391321	-0.0596625467859221	-0.0378243958704826	-0.0751841082542648	0.0461963480621268	0.0549284119745425	0.0484159423091788	0.0380653071358432	0.0450359702621566	0.0492636995317815
Yif1a	M9	blue	-0.0386064991859239	0.0022896832694533	-0.0488395045571342	-0.0214474482715349	-0.000222684218261307	0.104495421745724	0.084331669807521	-0.00954559660707827	0.0192699731616796	0.137283329092918	0.0595718529073399
Armcx3	grey	grey	-0.017549580745888	-0.0407143832471341	-0.0873807493822137	-0.0946512426443535	-0.0116475099876586	0.106211711587082	0.04154700858355	0.0822935080021275	0.0658605789213689	0.0506385244093176	0.0495615979783878
Piga	M4	pink	-0.0372217516630424	-0.0677607209497685	-0.0433342017089877	-0.0231536555698886	0.067499994679785	0.0481005915528276	-0.0108834841686839	0.00100231955427573	-0.051382096511514	0.0325700368123041	-0.00944598382762103
Atp6v1e1	M1	yellow	-0.174778674662505	-0.115224471462313	-0.164874066286969	-0.122500691126741	0.110756883275906	0.268194007276842	0.232097445294724	0.129700812628954	0.238881868835112	0.226483422247335	0.183879217255531
Hdlbp	M10	red	-0.0315138523490956	-0.0661479327447468	-0.135617703421322	-0.0301255405708798	0.0747091971238012	0.0751736392357179	0.102118260668289	0.0748820106980994	0.0665899852437291	0.137989117009364	0.120066656885108
Samd11	M8	brown	0.0959770363359547	-0.0454751246103196	0.00117847755114423	0.018301563247591	-0.0187505924820227	-0.0481755212838284	0.0755089425391751	-0.0244462349901155	0.124611025643569	-0.00913329927662461	-0.0132879209619619
Mier3	grey	grey	0.0297193950929057	-0.0875396422688646	-0.105922820243912	-0.0721419200447067	0.0365100703550065	0.0942778843405944	0.0728815353451252	0.0791666672927655	0.00626002685321451	0.100812469871283	0.0446638429587969
Suco	M8	brown	-0.0597406703726731	-0.0553586320978009	-0.154203268741831	-0.0748107986925961	0.0562937299631989	0.116693849116311	0.141392118041901	0.148247989620441	0.272326134712834	0.0699178824670779	0.120254122669192
Snrk	M8	brown	-0.0485125381464892	-0.0462131082985512	-0.0695843135797597	-0.0425533002458415	0.051883263336199	0.137034149117125	0.0798303940455783	0.0729958918999941	0.0865486383124057	0.0527971495368818	0.0523358914178167
Psma6	grey	grey	-0.104789931141859	-0.0529444862932773	-0.138451023348386	-0.0401439864177136	0.0527472474579132	0.165405138643993	0.119974812374052	0.0615844506367657	0.0695448785934445	0.122209641869564	0.104382723784631
Psma2	M9	blue	-0.164789309136473	-0.0317028930271114	-0.121066688710321	-0.0873592744789711	0.0808623795917205	0.207992726878763	0.131888894046849	0.0701998270388353	0.0552626903503119	0.202311668010146	0.13805491682919
Cited2	M1	yellow	0.0634297383000109	-0.0674447353784726	-0.122385144246099	-0.0725229856199697	-0.0392868810383297	0.100343394690797	0.083348895877388	0.0635125217603114	0.0977287906018188	0.116652754090234	0.0568582840306554
Ddit3	M9	blue	0.0759466509443688	-0.0802551860393545	-0.0969432370679471	-0.0198750709205686	-0.0219976952366873	0.108241814395694	0.133007794795288	0.024329232748615	0.0655684544651688	0.124571012621395	0.0571414434545374
Nemf	grey	grey	0.0846462440161334	-0.0313594474857295	-0.0352135738565507	-0.0395280726139251	-0.0353699736490899	0.0553642114408209	0.00950897751179117	0.00705543377798564	-0.00728082018007932	0.0964639048416277	0.112173449991116
Ecpas	M6	green	-0.0459315758260437	-0.0739409899084878	-0.0626835719681235	-0.0391683713989197	0.00661077119608439	0.0401743795699336	0.091975568665408	0.040854332468341	0.0440528978931933	0.0978481729528398	0.0260597478331476
Cdc37l1	grey	grey	-0.00778669355052475	-0.0337244934041983	-0.0519635140178588	-0.0345097944169482	0.037377018965563	0.092640317691567	0.0660717807982579	0.0277446911425417	0.041833536298283	0.0943396964152548	0.0991169029548073
Brd3	grey	grey	-0.141540747708284	-0.103633082577822	-0.115610533937424	-0.0644868318020187	0.0529856624209006	0.191007637008912	0.136551780644234	0.0463148031189072	0.0944812887840883	0.16706815532318	0.123741731142933
Naa35	M9	blue	-0.0117812421260895	-0.085736781182659	-0.0946310169536031	0.022666146805894	-0.0458795656278829	0.0534422006761678	0.0716127723747613	0.0348311886629826	0.0414142795572805	0.114755158107064	0.108173635165557
Eif2s2	M9	blue	-0.0640657233029313	-0.0147564033416425	-0.0356559472308359	0.000577048898063436	0.00776524327537469	0.0995925297297472	0.106952893220127	0.0478163330151326	0.0435004523945672	0.180400169785915	0.0687711347502187
Dusp5	M1	yellow	0.174976530493653	-0.0370954048642544	-0.126388137062841	-0.0166537313896014	-0.00574597048264052	0.044600489878899	0.0685013918223002	0.0687424389727481	0.105209271964657	0.0837591895170576	0.0730602884821298
Uqcrq	grey	grey	-0.117215586806357	-0.0875962299678111	-0.18955105242919	-0.0787557377451169	0.104762789906312	0.173632822120777	0.182364543224109	0.0816346547282274	0.122564159873805	0.223385110963315	0.135058560741466
Pik3cb	M9	blue	-0.0289568823150214	0.0134964185508839	-0.0422784591744322	0.032276043271893	0.00880988921361008	0.0872489967761948	0.0656428408116831	-0.0163138304750838	0.0609518245399076	0.107165204471441	0.0298216523918873
Syt11	M9	blue	0.108135159092037	0.00870329640675253	-0.0748164740266626	-0.0132151861401819	-0.0197273665361927	0.0514513351083142	0.0398290173660466	-0.00553921833280519	-0.0407895659502726	0.127223855584915	0.000593391431647583
Arhgap1	M7	turquoise	-0.0740734051631658	-0.0700563708062404	-0.0772891644059161	-0.0603486196397419	0.0441368826383077	0.120505371827788	0.140142049308708	0.0864531378889002	0.129025897211323	0.0969086238371675	0.112273720468168
Rps2	M9	blue	-0.0405270745622104	-0.0648512279030078	-0.133124687290464	-0.0607354043238042	0.0982898209836093	0.214331468688713	0.176014225427797	0.0246388393732738	0.105086175010069	0.266085790311354	0.158501632096769
[truncated: 202 more rows]
