# Supplementary material for: Single-Cell Transcriptomic Profiles of Lung Pre-Metastatic Niche Reveal Neutrophil and Lymphatic Endothelial Cell Roles in Breast Cancer
Source: Cancers (Basel). 2022 Dec 28;15(1):176. doi: 10.3390/cancers15010176 (PMC9818165; doi:10.3390/cancers15010176)
Supplement: Supplementary file 1 [file cancers-15-00176-s001.zip › Table S8.xlsx]

## Sheet: M4_DAVID_KEGG
Category	Term	Count	%	PValue	-Log10(Pvalue)	Genes	List Total	Pop Hits	Pop Total	Fold Enrichment	Bonferroni	Benjamini	FDR
KEGG_PATHWAY	mmu05143:African trypanosomiasis	4	5.71429	0.000378	3.42252	HBA-A2, HBB-BT, HBA-A1, HBB-BS	34	39	8977	27.0799	0.0264854	0.0268374	0.0268374
KEGG_PATHWAY	mmu05144:Malaria	4	5.71429	0.00115692	2.9367	HBA-A2, HBB-BT, HBA-A1, HBB-BS	34	57	8977	18.5284	0.0789023	0.0410708	0.0410708
KEGG_PATHWAY	mmu01240:Biosynthesis of cofactors	4	5.71429	0.0179113	1.74687	DHFR, GMPPB, ALAS2, COASY	34	152	8977	6.94814	0.722859	0.4239	0.4239
