# Supplementary material for: Single-Cell Transcriptomic Profiles of Lung Pre-Metastatic Niche Reveal Neutrophil and Lymphatic Endothelial Cell Roles in Breast Cancer
Source: Cancers (Basel). 2022 Dec 28;15(1):176. doi: 10.3390/cancers15010176 (PMC9818165; doi:10.3390/cancers15010176)
Supplement: Supplementary file 1 [file cancers-15-00176-s001.zip › Table S9.xlsx]

## Sheet: M5_DAVID_KEGG
Category	Term	Count	%	PValue	-Log10(Pvalue)	Genes	List Total	Pop Hits	Pop Total	Fold Enrichment	Bonferroni	Benjamini	FDR
KEGG_PATHWAY	mmu04910:Insulin signaling pathway	3	5.66038	0.0487146	1.31234	SOCS3, TSC1, SH2B2	24	139	8977	8.07284	0.966493	1	1
KEGG_PATHWAY	mmu04390:Hippo signaling pathway	3	5.66038	0.0605063	1.2182	ID1, AREG, BBC3	24	157	8977	7.14729	0.985652	1	1
