# Supplementary material for: Single-Cell Transcriptomic Profiles of Lung Pre-Metastatic Niche Reveal Neutrophil and Lymphatic Endothelial Cell Roles in Breast Cancer
Source: Cancers (Basel). 2022 Dec 28;15(1):176. doi: 10.3390/cancers15010176 (PMC9818165; doi:10.3390/cancers15010176)
Supplement: Supplementary file 1 [file cancers-15-00176-s001.zip › Table S10.xlsx]

## Sheet: M7_DAVID_KEGG
Category	Term	Count	%	PValue	-Log10(Pvalue)	Genes	List Total	Pop Hits	Pop Total	Fold Enrichment	Bonferroni	Benjamini	FDR
KEGG_PATHWAY	mmu01200:Carbon metabolism	11	3.32326	1.6799e-05	4.77472	GPI1, HK3, ADPGK, G6PDX, PGK1, PGLS, ACOX3, ENO1, PGD, TKT, GAPDH	140	121	8977	5.82922	0.00419099	0.00419976	0.00398137
KEGG_PATHWAY	mmu01100:Metabolic pathways	45	13.5952	6.46543e-05	4.1894	PFKFB2, DGKG, ATP6V1A, NDUFB11, ADPGK, MT-CO1, MGST1, MGST2, MAT2B, ENO1, ATP5O, NT5C3, HACD4, GPI1, HSD11B1, HK3, ALDH2, RDH12, GYG, ALDH3B1, NAMPT, LIPG, PGK1, CYC1, LTA4H, KMT5A, PGLS, UPP1, GGT1, DGAT2, GPX1, SQOR, NDUFC2, PGD, CYP51, TST, ETHE1, G6PDX, DEGS1, ACOX3, GCLM, TKT, GAPDH, PAFAH1B3, MGLL	140	1619	8977	1.78225	0.0160342	0.00612626	0.0058077
KEGG_PATHWAY	mmu00010:Glycolysis / Gluconeogenesis	8	2.41692	7.35151e-05	4.13362	GPI1, HK3, ALDH2, ADPGK, ALDH3B1, PGK1, ENO1, GAPDH	140	67	8977	7.65629	0.0182116	0.00612626	0.0058077
KEGG_PATHWAY	mmu05415:Diabetic cardiomyopathy	12	3.62538	0.000418981	3.37781	PARP1, NDUFB11, MT-CO1, G6PDX, RAC2, CYBB, NDUFC2, CYC1, ATP5O, GAPDH, MMP9, MAPK13	140	211	8977	3.64672	0.0994658	0.0261863	0.0248246
KEGG_PATHWAY	mmu00480:Glutathione metabolism	7	2.1148	0.000835588	3.07801	GPX1, G6PDX, MGST1, MGST2, PGD, GGT1, GCLM	140	72	8977	6.23403	0.188592	0.0417794	0.0396069
KEGG_PATHWAY	mmu00030:Pentose phosphate pathway	5	1.51057	0.00158952	2.79873	GPI1, G6PDX, PGLS, PGD, TKT	140	33	8977	9.71537	0.328135	0.0662302	0.0627862
KEGG_PATHWAY	mmu04670:Leukocyte transendothelial migration	8	2.41692	0.00231886	2.63473	VASP, ITGB2L, ACTN1, RAC2, CYBB, MMP9, ACTB, MAPK13	140	118	8977	4.34722	0.440319	0.0810896	0.0768729
KEGG_PATHWAY	mmu05012:Parkinson disease	12	3.62538	0.00259487	2.58589	SEM1, TUBB2A, PSMD14, NDUFB11, MT-CO1, LRRK2, GNAS, NDUFC2, KEAP1, UBE2L6, CYC1, ATP5O	140	264	8977	2.91461	0.477724	0.0810896	0.0768729
KEGG_PATHWAY	mmu04657:IL-17 signaling pathway	7	2.1148	0.00312937	2.50454	FOSL1, HSP90AB1, LCN2, CXCL3, MMP9, S100A8, MAPK13	140	93	8977	4.82634	0.543227	0.086927	0.0824068
KEGG_PATHWAY	mmu04613:Neutrophil extracellular trap formation	10	3.02115	0.00478924	2.31973	SELP, ITGB2L, FPR1, RAC2, CYBB, FPR2, PADI4, ACTB, CAMP, MAPK13	140	207	8977	3.09765	0.698862	0.119731	0.113505
KEGG_PATHWAY	mmu05418:Fluid shear stress and atherosclerosis	8	2.41692	0.00802459	2.09558	HSP90AB1, MGST1, RAC2, MGST2, KEAP1, MMP9, ACTB, MAPK13	140	148	8977	3.46602	0.866578	0.179874	0.17052
KEGG_PATHWAY	mmu05020:Prion disease	11	3.32326	0.00863395	2.06379	SEM1, TUBB2A, PSMD14, NDUFB11, MT-CO1, RAC2, CYBB, NDUFC2, CYC1, ATP5O, MAPK13	140	268	8977	2.63185	0.885578	0.179874	0.17052
KEGG_PATHWAY	mmu04714:Thermogenesis	10	3.02115	0.009601	2.01768	NDUFB11, MT-CO1, ZFP516, GNAS, NDUFC2, CYC1, ATP5O, ACTB, MGLL, MAPK13	140	231	8977	2.77582	0.910351	0.184635	0.175034
KEGG_PATHWAY	mmu00920:Sulfur metabolism	3	0.906344	0.0119469	1.92274	TST, ETHE1, SQOR	140	11	8977	17.4877	0.950447	0.213338	0.202245
KEGG_PATHWAY	mmu04110:Cell cycle	7	2.1148	0.0129054	1.88923	CCND3, CDC45, TFDP1, YWHAB, CCNE1, E2F2, MCM5	140	125	8977	3.5908	0.961123	0.21509	0.203905
KEGG_PATHWAY	mmu05022:Pathways of neurodegeneration - multiple diseases	15	4.53172	0.0141485	1.84929	APP, GPX1, PSMD14, NDUFB11, MT-CO1, LRRK2, CYBB, NDUFC2, UBE2L6, ATP5O, MAPK13, SEM1, TUBB2A, CYC1, CDK5R1	140	471	8977	2.04208	0.971629	0.215729	0.204512
KEGG_PATHWAY	mmu00561:Glycerolipid metabolism	5	1.51057	0.0153569	1.8137	DGKG, DGAT2, ALDH2, LIPG, MGLL	140	62	8977	5.17108	0.979121	0.215729	0.204512
KEGG_PATHWAY	mmu05010:Alzheimer disease	13	3.92749	0.0155325	1.80876	APP, PSMD14, NDUFB11, MT-CO1, CYBB, NDUFC2, ATP5O, SEM1, TUBB2A, APOE, CYC1, GAPDH, CDK5R1	140	383	8977	2.17645	0.980032	0.215729	0.204512
KEGG_PATHWAY	mmu04015:Rap1 signaling pathway	9	2.71903	0.0179545	1.74583	VASP, ITGB2L, KIT, FPR1, RAC2, GNAS, TLN1, ACTB, MAPK13	140	214	8977	2.6967	0.989213	0.236244	0.223959
KEGG_PATHWAY	mmu05208:Chemical carcinogenesis - reactive oxygen species	9	2.71903	0.0218525	1.6605	NDUFB11, MT-CO1, MGST1, MGST2, NDUFC2, KEAP1, CYC1, ATP5O, MAPK13	140	222	8977	2.59952	0.996009	0.273156	0.258952
KEGG_PATHWAY	mmu05169:Epstein-Barr virus infection	9	2.71903	0.0269165	1.56998	SEM1, CCND3, PSMD14, CCNE1, E2F2, VIM, CD3D, SAP30, MAPK13	140	231	8977	2.49824	0.99891	0.316533	0.300073
KEGG_PATHWAY	mmu05014:Amyotrophic lateral sclerosis	12	3.62538	0.0278549	1.5551	SEM1, TUBB2A, GPX1, PSMD14, NDUFB11, MT-CO1, ANXA11, NDUFC2, CYC1, ATP5O, ACTB, MAPK13	140	369	8977	2.08525	0.999143	0.316533	0.300073
KEGG_PATHWAY	mmu04066:HIF-1 signaling pathway	6	1.81269	0.03177	1.49798	HK3, PGK1, CYBB, ENO1, GAPDH, PDK1	140	114	8977	3.37481	0.999688	0.345326	0.327369
KEGG_PATHWAY	mmu01230:Biosynthesis of amino acids	5	1.51057	0.0338827	1.47002	PGK1, MAT2B, ENO1, TKT, GAPDH	140	79	8977	4.05832	0.999819	0.352945	0.334592
KEGG_PATHWAY	mmu04979:Cholesterol metabolism	4	1.20846	0.0399077	1.39894	APOC2, LIPG, TSPO, APOE	140	49	8977	5.2344	0.999962	0.386355	0.366264
KEGG_PATHWAY	mmu05166:Human T-cell leukemia virus 1 infection	9	2.71903	0.0401809	1.39598	FOSL1, CCND3, ITGB2L, CCNE1, TSPO, E2F2, GPS2, TLN1, CD3D	140	250	8977	2.30837	0.999965	0.386355	0.366264
KEGG_PATHWAY	mmu04621:NOD-like receptor signaling pathway	8	2.41692	0.0473371	1.3248	PYCARD, RNASEL, HSP90AB1, NAMPT, CYBB, CXCL3, CAMP, MAPK13	140	213	8977	2.40832	0.999995	0.437571	0.414817
KEGG_PATHWAY	mmu03320:PPAR signaling pathway	5	1.51057	0.049008	1.30973	FABP5, PLIN2, DBI, ACOX3, SLC27A4	140	89	8977	3.60233	0.999996	0.437571	0.414817
KEGG_PATHWAY	mmu05135:Yersinia infection	6	1.81269	0.0568057	1.24561	PYCARD, ARPC2, RAC2, ARPC5, ACTB, MAPK13	140	134	8977	2.87111	1	0.485738	0.46048
KEGG_PATHWAY	mmu00190:Oxidative phosphorylation	6	1.81269	0.0582886	1.23442	ATP6V1A, NDUFB11, MT-CO1, NDUFC2, CYC1, ATP5O	140	135	8977	2.84984	1	0.485738	0.46048
KEGG_PATHWAY	mmu00410:beta-Alanine metabolism	3	0.906344	0.0873544	1.05872	ALDH2, ALDH3B1, ACOX3	140	32	8977	6.01138	1	0.697402	0.661137
KEGG_PATHWAY	mmu05230:Central carbon metabolism in cancer	4	1.20846	0.0911524	1.04023	HK3, G6PDX, KIT, PDK1	140	69	8977	3.71718	1	0.697402	0.661137
KEGG_PATHWAY	mmu05016:Huntington disease	9	2.71903	0.0965529	1.01523	SEM1, TUBB2A, GPX1, PSMD14, NDUFB11, MT-CO1, NDUFC2, CYC1, ATP5O	140	302	8977	1.9109	1	0.697402	0.661137
KEGG_PATHWAY	mmu00500:Starch and sucrose metabolism	3	0.906344	0.0968771	1.01378	GPI1, HK3, GYG	140	34	8977	5.65777	1	0.697402	0.661137
KEGG_PATHWAY	mmu05132:Salmonella infection	8	2.41692	0.0976363	1.01039	PYCARD, TUBB2A, HSP90AB1, ARPC2, ARPC5, GAPDH, ACTB, MAPK13	140	253	8977	2.02756	1	0.697402	0.661137
