# Supplementary material for: Single-Cell Transcriptomic Profiles of Lung Pre-Metastatic Niche Reveal Neutrophil and Lymphatic Endothelial Cell Roles in Breast Cancer
Source: Cancers (Basel). 2022 Dec 28;15(1):176. doi: 10.3390/cancers15010176 (PMC9818165; doi:10.3390/cancers15010176)
Supplement: Supplementary file 1 [file cancers-15-00176-s001.zip › Table S11.xlsx]

## Sheet: M8_DAVID_KEGG
Category	Term	Count	%	PValue	-Log10(Pvalue)	Genes	List Total	Pop Hits	Pop Total	Fold Enrichment	Bonferroni	Benjamini	FDR
KEGG_PATHWAY	mmu00230:Purine metabolism	6	3.24324	0.0045873	-2.33844	RRM1, RRM2, PDE4D, PDE2A, AK6, ITPA	74	134	8977	5.43183	0.493627	0.678921	0.678921
KEGG_PATHWAY	mmu01232:Nucleotide metabolism	4	2.16216	0.0307568	-1.51206	RRM1, RRM2, AK6, ITPA	74	84	8977	5.77671	0.990181	1	1
KEGG_PATHWAY	mmu04610:Complement and coagulation cascades	4	2.16216	0.0397922	-1.4002	THBD, ITGAM, PLAUR, F5	74	93	8977	5.21767	0.997545	1	1
KEGG_PATHWAY	mmu05205:Proteoglycans in cancer	5	2.7027	0.0852626	-1.06924	CD63, PLAUR, FLNA, THBS1, VEGFA	74	205	8977	2.9588	0.999998	1	1
