# Supplementary material for: Single-Cell Transcriptomic Profiles of Lung Pre-Metastatic Niche Reveal Neutrophil and Lymphatic Endothelial Cell Roles in Breast Cancer
Source: Cancers (Basel). 2022 Dec 28;15(1):176. doi: 10.3390/cancers15010176 (PMC9818165; doi:10.3390/cancers15010176)
Supplement: Supplementary file 1 [file cancers-15-00176-s001.zip › Table S12.xlsx]

## Sheet: M10_DAVID_KEGG
Category	Term	Count	%	PValue	-LOG10(Pvalue)	Genes	List Total	Pop Hits	Pop Total	Fold Enrichment	Bonferroni	Benjamini	FDR
KEGG_PATHWAY	mmu04145:Phagosome	5	3.78788	0.031346	1.50382	TUBB6, CTSL, CANX, CALR, TUBA8	60	182	8977	4.11035	0.97811	1	1
KEGG_PATHWAY	mmu04210:Apoptosis	4	3.0303	0.0598616	1.22285	CASP6, CTSL, CFLAR, TUBA8	60	136	8977	4.40049	0.999393	1	1
KEGG_PATHWAY	mmu00533:Glycosaminoglycan biosynthesis - keratan sulfate	2	1.51515	0.0882448	1.05431	FUT8, B3GNT2	60	14	8977	21.3738	0.999985	1	1
