# Supplementary material for: Single-Cell Transcriptomic Profiles of Lung Pre-Metastatic Niche Reveal Neutrophil and Lymphatic Endothelial Cell Roles in Breast Cancer
Source: Cancers (Basel). 2022 Dec 28;15(1):176. doi: 10.3390/cancers15010176 (PMC9818165; doi:10.3390/cancers15010176)
Supplement: Supplementary file 1 [file cancers-15-00176-s001.zip › Table S13.xls]

## Sheet: Sheet0
© 2000-2022 QIAGEN. All rights reserved.
Ingenuity Canonical Pathways	-log(p-value)	Ratio	z-score	Molecules
Synaptogenesis Signaling Pathway	4.61	0.201	1.921	ADCY6,ADCY7,AP1B1,AP2A1,APOE,ATF2,BDNF,BRAF,CAMK2B,CDH1,CDH24,CDH4,CNTNAP1,CREB3,CREB3L3,DNAJC5,EFNA2,EFNA4,EIF4EBP2,EPHA2,EPHA4,EPHB1,GOSR1,GPAA1,GRIA2,GRIA3,GRIN2D,ITSN1,LCK,LRP1,LRP8,LRRTM2,MRAS,NAPB,NAPG,NECTIN3,NLGN2,NRAS,PAK1,PIK3C3,PIK3CA,PIK3CB,PIK3CG,PLCG2,PRKACA,PRKAG1,PRKAR1B,RAB5B,RAP2B,RAPGEF1,RASD1,SNCG,SOS1,STX1A,STX1B,STXBP2,STXBP4,STXBP5,SYT12,SYT15,THBS3,VLDLR,WAS
Macropinocytosis Signaling	3.78	0.276	0.5	ABI1,ANKFY1,ARF6,HGF,ITGB3,ITGB5,MET,MRAS,NRAS,PAK1,PDGFB,PIK3C3,PIK3CA,PIK3CB,PIK3CG,PLCG2,PRKCA,RAB34,RAP2B,RASD1,USP6NL
Melanocyte Development and Pigmentation Signaling	3.77	0.255	1.225	ADCY6,ADCY7,ATF2,CREB3,CREB3L3,EP300,KIT,KITLG,MAP2K1,MITF,MRAS,NRAS,PIK3C3,PIK3CA,PIK3CB,PIK3CG,PLCG2,PRKACA,PRKAG1,PRKAR1B,RAP2B,RASD1,RPS6KA2,RPS6KA5,SOS1
Molecular Mechanisms of Cancer	3.75	0.178	#NUM!	ADCY6,ADCY7,APH1B,Aph1c,ARHGEF10,ARHGEF17,ARHGEF5,ARHGEF6,ATR,AURKA,BAK1,BID,BIRC3,BMP6,BMP8A,BRAF,CAMK2B,CASP7,CBL,CCNE2,CDC25A,CDH1,CDK10,CDK14,CDK8,CDKN2B,CDKN2D,E2F1,E2F7,EP300,FZD9,GNA14,GNAL,GNAO1,GNAT1,GNAZ,HDAC6,HDAC9,ITGA2B,ITGA3,ITGB3,ITGB5,LRP1,MAP2K1,MRAS,NAIP,Naip1 (includes others),NCSTN,NF1,NLK,NRAS,PAK1,PIK3C3,PIK3CA,PIK3CB,PIK3CG,PRKACA,PRKAG1,PRKAR1B,PRKCA,PSEN1,RABIF,RAP2B,RAPG…
AMPK Signaling	3.74	0.201	-0.73	ADRB1,AK2,AK3,AK4,AK6,AKT1S1,ARID2,ATF2,CHRM3,CHRNE,CPT1C,CREB3,CREB3L3,CRTC2,DPF1,EEF2K,EP300,FASN,FOXO3,GNA14,GNAL,GNAO1,GNAT1,GNAZ,HMGCR,KAT2B,LIPE,MRAS,PCK2,PFKFB3,PFKFB4,PFKL,PIK3C3,PIK3CA,PIK3CB,PIK3CG,PPM1B,PPM1D,PPM1K,PRKAA1,PRKAA2,PRKACA,PRKAG1,PRKAR1B,RPTOR,SLC2A1,SMARCB1,SMARCD2,TSC1
1D-myo-inositol Hexakisphosphate Biosynthesis II (Mammalian)	3.43	0.471	1.414	INPP5A,INPP5D,INPP5E,INPP5F,INPP5J,IPMK,IPPK,ITPKC
HER-2 Signaling in Breast Cancer	3.4	0.199	1.667	AAAS,AKT1S1,ARF3,ARF6,BRAF,CASP7,CCNE2,COX10,COX4I2,COX7B,FOXO3,HBEGF,IKBKE,ITGB3,ITGB5,LCK,MAP2K1,MMP2,MRAS,MTCL1,NRAS,NUP133,NUP160,NUP214,NUP35,NUP43,NUP54,PARD6A,PDK1,PIK3C3,PIK3CA,PIK3CB,PIK3CG,PRKCA,PTGS2,RAE1,RAP2B,RASD1,REL,RPS6,RPTOR,SOS1,SURF1,TP53RK,TSC1
IGF-1 Signaling	3.34	0.24	0.688	FOXO3,IGF1,IGFBP2,IGFBP3,IGFBP5,IGFBP6,MAP2K1,MRAS,NRAS,PIK3C3,PIK3CA,PIK3CB,PIK3CG,PRKACA,PRKAG1,PRKAR1B,RAP2B,RASD1,SOCS1,SOCS2,SOCS5,SOCS6,SOCS7,SOS1,SRF
Autophagy	3.32	0.2	1.067	AKT1S1,ATF2,ATG10,ATG12,ATG4B,ATG9A,ATR,BMP6,BNIP3,CHP1,CREB3,CREB3L3,DRAM1,E2F1,ERN1,FOXO3,GABARAPL2,HGF,IGF1,MAP2K1,MAP2K7,PDGFB,PI4K2A,PIK3C3,PIK3CA,PIK3CB,PIK3CG,PPM1D,PPP3CC,PRKAA1,PRKAA2,PRKACA,PRKAG1,PRKAR1B,RGS19,RPTOR,SLC7A5,TGFB2,TRAF6,TSC1,VPS11,VPS33A,VPS39
Relaxin Signaling	3.17	0.213	-0.277	ADCY6,ADCY7,BRAF,GAST,GDPD3,GNA14,GNAL,GNAO1,GNAT1,GNAZ,MAP2K1,MPPED2,MRAS,NAPEPLD,NPR3,NT5C,PDE10A,PDE12,PDE3A,PDE3B,PDE4A,PDE5A,PDE7A,PDE8B,PIK3C3,PIK3CA,PIK3CB,PIK3CG,PNPLA8,PRKACA,PRKAG1,PRKAR1B,REL
Apelin Pancreas Signaling Pathway	3.16	0.304	-0.277	APLN,APLNR,ERN1,PDE3B,PIK3C3,PIK3CA,PIK3CB,PIK3CG,PRKAA1,PRKAA2,PRKACA,PRKAG1,PRKAR1B,REL
ERBB4 Signaling	3.08	0.265	1.941	ADAM17,APH1B,Aph1c,MAP2K1,MRAS,NCSTN,NRAS,NRG2,PIK3C3,PIK3CA,PIK3CB,PIK3CG,PLCG2,PRKCA,PSEN1,RAP2B,RASD1,SOS1
Virus Entry via Endocytic Pathways	2.97	0.231	#NUM!	ACTA1,ACTA2,AP1B1,AP1G1,AP2A1,AP3B1,AP3M1,AP3S1,CXADR,HLA-A,ITGB3,ITGB5,ITSN1,MR1,MRAS,NRAS,PIK3C3,PIK3CA,PIK3CB,PIK3CG,PLCG2,PRKCA,RAP2B,RASD1
PFKFB4 Signaling Pathway	2.96	0.292	0.535	AMPD1,ATF2,CREB3,CREB3L3,HK2,MAP2K1,MAP2K7,PFKFB4,PRKACA,PRKAG1,PRKAR1B,RPS6KA5,TGFB2,TKT
Regulation of the Epithelial-Mesenchymal Transition Pathway	2.79	0.195	#NUM!	ADAM17,APH1B,Aph1c,BCL9,BRAF,CDH1,DVL2,FGF23,FOXC2,FZD9,HGF,ID2,MAP2K1,MAP2K7,MET,MMP2,MRAS,NCSTN,NOTCH2,NOTCH3,NRAS,PARD6A,PIK3C3,PIK3CA,PIK3CB,PIK3CG,PSEN1,PYGO1,RAP2B,RASD1,REL,SMO,SOS1,Tcf7,TGFB2,WNT2,WNT5B,ZEB2
Coenzyme A Biosynthesis	2.77	1	#NUM!	COASY,PPCDC,PPCS
Palmitate Biosynthesis I (Animals)	2.77	1	#NUM!	CBR4,FASN,OXSM
4-aminobutyrate Degradation I	2.77	1	#NUM!	ABAT,ALDH5A1,SUCLG2
Renal Cell Carcinoma Signaling	2.68	0.241	1.387	CUL2,EGLN3,EP300,HGF,MAP2K1,MET,MRAS,NRAS,PAK1,PDGFB,PIK3C3,PIK3CA,PIK3CB,PIK3CG,RAP2B,RAPGEF1,RASD1,SLC2A1,SOS1
tRNA Splicing	2.65	0.283	-0.632	GDPD3,MPPED2,NAPEPLD,PDE10A,PDE12,PDE3A,PDE3B,PDE4A,PDE5A,PDE7A,PDE8B,PNPLA8,TSEN15
D-myo-inositol (1,3,4)-trisphosphate Biosynthesis	2.64	0.412	1.134	INPP5A,INPP5D,INPP5E,INPP5F,INPP5J,IPMK,ITPKC
Signaling by Rho Family GTPases	2.63	0.18	1.808	ACTA1,ACTA2,ARHGEF10,ARHGEF17,ARHGEF5,ARHGEF6,CDC42EP1,CDC42EP2,CDC42EP3,CDC42EP4,CDH1,CDH24,CDH4,CFL2,CIT,GNA14,GNAL,GNAO1,GNAT1,GNAZ,ITGA2B,ITGA3,ITGB3,ITGB5,MAP2K1,MAP2K7,MRAS,MYL1,MYL4,NCF2,PAK1,PARD6A,PIK3C3,PIK3CA,PIK3CB,PIK3CG,PIKFYVE,PIP4K2A,PIP4K2B,PLD1,REL,RHOBTB2,RHOF,RHOH,RHOT2,RHOU,STMN1,WAS
Superpathway of D-myo-inositol (1,4,5)-trisphosphate Metabolism	2.55	0.364	1.414	BPNT1,INPP5A,INPP5D,INPP5E,INPP5F,INPP5J,IPMK,ITPKC
PI3K Signaling in B Lymphocytes	2.53	0.203	2.2	ATF2,ATF5,CAMK2B,CBL,CHP1,DAPP1,FOXO3,IKBKE,IL4R,INPP5D,MALT1,MAP2K1,MRAS,NFATC2,NFATC4,NRAS,PIK3CA,PIK3CB,PIK3CG,PLCD1,PLCG2,PLCL1,PLCL2,PLEKHA1,PPP3CC,RAP2B,RASD1,REL,VAV3	29
JAK/STAT Signaling	2.49	0.232	1.213	CISH,GAST,MAP2K1,MRAS,NRAS,PIAS1,PIK3C3,PIK3CA,PIK3CB,PIK3CG,RAP2B,RASD1,REL,SOCS1,SOCS2,SOCS5,SOCS6,SOCS7,SOS1
Growth Hormone Signaling	2.44	0.239	1.291	IGF1,IGF2,IGFBP3,PIK3C3,PIK3CA,PIK3CB,PIK3CG,PLCG2,PRKCA,RPS6KA2,RPS6KA5,SOCS1,SOCS2,SOCS5,SOCS6,SOCS7,SRF
NGF Signaling	2.42	0.208	2.132	ATF2,CREB3,CREB3L3,IKBKE,MAP2K1,MAP3K3,MAP3K4,MAPK7,MRAS,NRAS,PIK3C3,PIK3CA,PIK3CB,PIK3CG,PLCG2,RAP2B,RASD1,REL,RPS6KA2,RPS6KA5,SMPD2,SMPD4,SOS1,TRAF4,TRAF6	25
Gap Junction Signaling	2.41	0.187	#NUM!	ACTA1,ACTA2,ADCY6,ADCY7,ADRB1,CSNK1D,CSNK1G1,DBN1,GAST,GRIA2,GRIA3,GRIK3,MAP2K1,MAPK7,MRAS,NPR3,NRAS,NT5C,PIK3C3,PIK3CA,PIK3CB,PIK3CG,PLCD1,PLCG2,PLCL1,PLCL2,PPP3CC,PRKACA,PRKAG1,PRKAR1B,PRKCA,PRKG1,RAP2B,RASD1,SOS1,TUBA1C,TUBB2B
Notch Signaling	2.41	0.289	1.134	ADAM17,APH1B,Aph1c,DLL1,DTX2,HEY1,HEY2,NCSTN,NOTCH2,NOTCH3,PSEN1
Cardiac Hypertrophy Signaling	2.41	0.178	1.581	ADCY6,ADCY7,ADRB1,ATF2,CACNA1E,CHP1,EIF2B1,EIF4E,EP300,GNA14,GNAL,GNAO1,GNAT1,GNAZ,IGF1,MAP2K1,MAP2K7,MAP3K3,MAP3K4,MRAS,MYL1,MYL4,NFATC4,NRAS,PIK3C3,PIK3CA,PIK3CB,PIK3CG,PLCD1,PLCG2,PLCL1,PLCL2,PPP3CC,PRKACA,PRKAG1,PRKAR1B,RAP2B,RASD1,RHOBTB2,RHOF,RHOH,RHOT2,RHOU,SOS1,SRF,TGFB2
Sirtuin Signaling Pathway	2.39	0.174	1	ATG10,ATG12,ATG16L2,ATG4B,ATG4D,ATG9A,BPGM,CDH1,CLOCK,CPT1C,CRTC2,CYC1,E2F1,FOXO3,G6PD,GABARAPL2,H1-0,MAPK7,NDUFA12,NDUFA4L2,NDUFAF1,NDUFB2,NR1H3,PAM16,PCK2,PDK1,PFKFB3,POLR1C,POLR1E,PPID,PPIF,PRKAA1,PRKAA2,RARB,REL,RPTOR,RRP9,SF3A1,SIRT4,SIRT5,SLC2A1,SOD3,TIMM17B,TIMM23,TIMM9,TOMM40L,TOMM7,TSPO,TUBA1C,XRCC6
Glioma Invasiveness Signaling	2.37	0.236	1.807	ITGB3,MMP2,MRAS,NRAS,PIK3C3,PIK3CA,PIK3CB,PIK3CG,RAP2B,RASD1,RHOBTB2,RHOF,RHOH,RHOT2,RHOU,TIMP4,VTN
Circadian Rhythm Signaling	2.37	0.176	#NUM!	ADCY6,ADCY7,ADRB1,AKT1S1,ATF2,BDNF,BRAF,BTRC,CACNA1E,CAMK2B,CATSPER2,CIART,CIRBP,CLOCK,CREB3,CREB3L3,CSNK1D,EIF4E,EIF4EBP2,GAST,GNA14,GRIA2,GRIA3,GRIN2D,KLK3,LCK,MAP2K1,MAP2K7,MRAS,NPR3,NRAS,NT5C,PLCD1,PLCG2,PLCL1,PLCL2,PRKAA1,PRKAA2,PRKACA,PRKAG1,PRKAR1B,PRKCA,PRKG1,RAP2B,RASD1,RPS6KA5,RPTOR
NF-κB Activation by Viruses	2.37	0.231	1.5	EIF2AK2,ELP1,IKBKE,ITGA3,ITGB3,LCK,MRAS,NRAS,PIK3C3,PIK3CA,PIK3CB,PIK3CG,PRKCA,RAP2B,RASD1,REL,TBP,TRAF2
HIF1α Signaling	2.36	0.184	0	BMP6,BRAF,CAMK2B,CHP1,COPS5,CUL2,EGLN2,EGLN3,EIF4E,EP300,FLT1,HGF,HK2,IGF1,IGF2,MAP2K1,MAP2K7,MET,MMP15,MMP2,MRAS,NCF2,NCOA1,NRAS,PDGFB,PIK3C3,PIK3CA,PIK3CB,PIK3CG,PLCG2,PPP3CC,PRKCA,RAP2B,RASD1,RPS6,SERPINE1,SLC2A1,TGFB2
RANK Signaling in Osteoclasts	2.31	0.22	0.728	BIRC3,CBL,CHP1,ELP1,GSN,IKBKE,MAP2K1,MAP2K7,MAP3K3,MAP3K4,MITF,NFATC2,PIK3C3,PIK3CA,PIK3CB,PIK3CG,PPP3CC,REL,TRAF2,TRAF6
IL-4 Signaling	2.31	0.22	#NUM!	HLA-A,HLA-DMA,HLA-DQA1,HLA-DQB1,IL4R,INPP5D,INPP5F,INPP5J,MRAS,NFATC2,NFATC4,NRAS,PIK3C3,PIK3CA,PIK3CB,PIK3CG,RAP2B,RASD1,SOCS1,SOS1
Melanoma Signaling	2.31	0.26	1.265	BRAF,CDH1,E2F1,MAP2K1,MITF,MRAS,NRAS,PIK3C3,PIK3CA,PIK3CB,PIK3CG,RAP2B,RASD1
MSP-RON Signaling In Macrophages Pathway	2.3	0.207	0.853	ATF2,CREB3,CREB3L3,ETV3,HLA-DMA,HLA-DQA1,HLA-DQB1,IKBKE,KLK3,KLK8,MRAS,NFKBIZ,NRAS,PIK3C3,PIK3CA,PIK3CB,PIK3CG,PTGS2,RAP2B,RASD1,REL,SBNO2,SOCS1,SOS1
Inositol Pyrophosphates Biosynthesis	2.27	0.571	1	IP6K3,IPMK,IPPK,PPIP5K2
Apoptosis Signaling	2.27	0.212	-1.414	BAK1,BID,BIRC3,CAPN1,CAPN7,CASP7,CYC1,DFFA,DFFB,ELP1,IKBKE,MAP2K1,MAP2K7,MRAS,NAIP,Naip1 (includes others),NRAS,PLCG2,PRKCA,RAP2B,RASD1,REL
UVA-Induced MAPK Signaling	2.26	0.214	2.138	MRAS,NRAS,PARP2,PARP4,PARP9,PIK3C3,PIK3CA,PIK3CB,PIK3CG,PLCD1,PLCG2,PLCL1,PLCL2,PRKCA,RAP2B,RASD1,RPS6KA2,RPS6KA5,SMPD2,SMPD4,TNKS
Prolactin Signaling	2.25	0.221	0.728	EP300,IRF1,MAP2K1,MRAS,NRAS,PIK3C3,PIK3CA,PIK3CB,PIK3CG,PLCG2,PRKCA,RAP2B,RASD1,SOCS1,SOCS2,SOCS5,SOCS6,SOCS7,SOS1
RAC Signaling	2.22	0.197	1.091	ANK1,CFL2,ITGA2B,ITGA3,ITGB3,ITGB5,MAP2K1,MAP2K7,MCF2L,MRAS,NCF2,NCKAP1,NRAS,PAK1,PARD6A,PIK3C3,PIK3CA,PIK3CB,PIK3CG,PIKFYVE,PIP4K2A,PIP4K2B,PLD1,RAP2B,RASD1,REL,SH3RF1
Glioblastoma Multiforme Signaling	2.21	0.188	2.353	CCNE2,E2F1,E2F7,FZD9,IGF1,IGF2,MAP2K1,MRAS,NF1,NF2,NRAS,PDGFB,PIK3C3,PIK3CA,PIK3CB,PIK3CG,PLCD1,PLCG2,PLCL1,PLCL2,RAP2B,RASD1,RHOBTB2,RHOF,RHOH,RHOT2,RHOU,SMO,SOS1,TSC1,WNT2,WNT5B
FLT3 Signaling in Hematopoietic Progenitor Cells	2.18	0.222	2.183	ATF2,CBL,CREB3,CREB3L3,EIF4E,INPP5D,MAP2K1,MRAS,NRAS,PIK3C3,PIK3CA,PIK3CB,PIK3CG,RAP2B,RASD1,RPS6KA2,RPS6KA5,SOS1
PPARα/RXRα Activation	2.18	0.183	-1.177	ACAA1,ACVR1B,ADCY6,ADCY7,BCL3,CHD5,CLOCK,ELP1,EP300,FASN,GNA14,IKBKE,IL1R1,IL1RAP,ITGB5,MAP2K1,MAP2K7,MRAS,NRAS,PLCD1,PLCG2,PLCL1,PLCL2,PRKAA1,PRKAA2,PRKACA,PRKAG1,PRKAR1B,PRKCA,RAP2B,RASD1,REL,SOS1,TGFB2,TRAF6
Leptin Signaling in Obesity	2.12	0.224	0	ADCY6,ADCY7,MAP2K1,NPY,PDE3A,PDE3B,PIK3C3,PIK3CA,PIK3CB,PIK3CG,PLCD1,PLCG2,PLCL1,PLCL2,PRKACA,PRKAG1,PRKAR1B
Clathrin-mediated Endocytosis Signaling	2.11	0.181	#NUM!	ACTA1,ACTA2,AP1B1,AP1G1,AP2A1,AP3B1,AP3M1,AP3S1,APOD,APOE,ARF6,CBL,CHP1,DNM3,FGF23,GAK,HGS,HIP1R,IGF1,ITGB3,ITGB5,LDLRAP1,LYZ,MET,PDGFB,PIK3C3,PIK3CA,PIK3CB,PIK3CG,PPP3CC,RAB4A,RAB5B,S100A8,SH3KBP1,STAM
Senescence Pathway	2.1	0.168	0.447	ACVR1B,ANAPC1,ANAPC13,ANAPC2,ASXL3,ATR,BRAF,CACNA1E,CAPN1,CAPN7,CAT,CCNE2,CDC16,CDC25A,CDKN2B,CHP1,E2F1,E2F7,EIF4E,EP300,EP400,FOXO3,IKBKE,KAT2B,MAP2K1,MAP2K7,MAPK7,MAPKAPK5,MRAS,MRE11,NF1,NFATC2,NFATC4,NRAS,PDK1,PDK4,PHF1,PIK3C3,PIK3CA,PIK3CB,PIK3CG,PML,PPP3CC,RAP2B,RASD1,RPS6KA5,SERPINE1,TGFB2,TLR2,TRAF6
Fatty Acid β-oxidation I	2.1	0.278	2.121	ACAA1,Acaa1b,ACAA2,ACSF2,ACSL3,ACSL4,ECHDC3,ECHS1,ECI1,ECI2
Granzyme B Signaling	2.09	0.375	0.447	BID,DFFA,DFFB,LMNB2,NUMA1,PRF1
D-myo-inositol (1,4,5)-trisphosphate Degradation	2.09	0.375	1.633	BPNT1,INPP5A,INPP5D,INPP5E,INPP5F,INPP5J
Small Cell Lung Cancer Signaling	2.09	0.211	0.905	BID,CCNE2,CDKN2B,CYC1,E2F1,HDAC6,HDAC9,IKBKE,PIK3C3,PIK3CA,PIK3CB,PIK3CG,PTGS2,RARB,REL,RXRB,SIN3A,TRAF2,TRAF4,TRAF6
Insulin Receptor Signaling	2.09	0.193	1.225	CBL,EIF2B1,EIF4E,FOXO3,INPP5D,INPP5F,INPP5J,LIPE,MAP2K1,MRAS,NRAS,PDE3B,PIK3C3,PIK3CA,PIK3CB,PIK3CG,PRKACA,PRKAG1,PRKAR1B,PTPRF,RAP2B,RAPGEF1,RASD1,RPTOR,SOS1,STXBP4,TSC1
Endocannabinoid Cancer Inhibition Pathway	2.07	0.19	-0.756	ADCY6,ADCY7,AKT1S1,ATF2,CASP7,CCNE2,CDH1,CREB3,CREB3L3,GNAL,GNAO1,MAP2K1,MAP2K7,MMP2,NSMAF,PIK3C3,PIK3CA,PIK3CB,PIK3CG,PRKAA1,PRKAA2,PRKACA,PRKAG1,PRKAR1B,RPTOR,SMPD2,SMPD4,Tcf7
Axonal Guidance Signaling	2.07	0.156	#NUM!	ABLIM1,ACE,ADAM15,ADAM17,ADAM19,ADAM33,ARHGEF6,BDNF,BMP6,BMP8A,CFL2,CHP1,COPS5,EFNA2,EFNA4,EIF4E,EPHA2,EPHA4,EPHB1,FARP2,FZD9,GNA14,GNAL,GNAO1,GNAT1,GNAZ,HHIP,IGF1,ITGA2B,ITGA3,ITGB3,ITGB5,ITSN1,MAP2K1,MET,MMP15,MMP2,MRAS,MYL1,MYL4,NFATC2,NFATC4,NRAS,NRP1,NTN4,PAK1,PDGFB,PIK3C3,PIK3CA,PIK3CB,PIK3CG,PITRM1,PLCD1,PLCG2,PLCL1,PLCL2,PLXNA1,PLXNB2,PPP3CC,PRKACA,PRKAG1,PRKAR1B,PRKCA,RAP2B,RASD1,SEMA3C,…
IL-8 Signaling	2.06	0.178	1.512	ANGPT1,BRAF,CDH1,CSTB,ELP1,FLT1,GNA14,GNAL,GNAO1,GNAT1,GNAZ,HBEGF,ICAM1,IKBKE,IRAK1,ITGB3,MAP2K1,MMP2,MRAS,NAPEPLD,NCF2,NRAS,PIK3C3,PIK3CA,PIK3CB,PIK3CG,PLD1,PRKCA,PTGS2,RAP2B,RASD1,RHOBTB2,RHOF,RHOH,RHOT2,RHOU,TRAF6
NAD Signaling Pathway	2.03	0.189	2.117	BMP6,CLOCK,ERN1,H1-0,HGF,IGF1,NADK,NAPRT,NMNAT1,NT5E,PARP2,PARP4,PARP9,PDGFB,PIK3C3,PIK3CA,PIK3CB,PIK3CG,POLRMT,PRKAA1,PRKAA2,PRKAG1,SIRT4,SIRT5,SLC29A4,SLC7A5,TGFB2,TNKS
Assembly of RNA Polymerase III Complex	2.03	0.417	0.447	BRF1,GTF3C1,GTF3C4,SF3A1,TBP
Oleate Biosynthesis II (Animals)	2.03	0.417	1.342	FADS1,FADS2,SCD,UFSP1,UFSP2
Apelin Muscle Signaling Pathway	2.02	0.25	-0.378	APLN,APLNR,GNA14,GNAL,GNAO1,GNAT1,GNAZ,MRAS,PRKAA1,PRKAA2,PRKAG1,TFAM
Thrombin Signaling	2.02	0.175	2.746	ADCY6,ADCY7,ARHGEF10,ARHGEF17,ARHGEF26,ARHGEF28,ARHGEF5,ARHGEF6,CAMK2B,GATA6,GNA14,GNAL,GNAO1,GNAT1,GNAZ,MAP2K1,MRAS,MYL1,MYL4,NRAS,PIK3C3,PIK3CA,PIK3CB,PIK3CG,PLCD1,PLCG2,PLCL1,PLCL2,PRKCA,RAP2B,RASD1,REL,RHOBTB2,RHOF,RHOH,RHOT2,RHOU,SOS1,TBP
Superoxide Radicals Degradation	2.02	0.5	0	CAT,CYGB,GPX7,SOD3
TWEAK Signaling	2.01	0.27	-1	BAG4,BID,BIRC3,CASP7,IKBKE,NAIP,Naip1 (includes others),REL,TNFRSF12A,TRAF2
Androgen Signaling	2	0.183	-0.905	CACNA1E,CATSPER2,CCNH,EP300,ERCC3,GNA14,GNAL,GNAO1,GNAT1,GNAZ,GTF2E1,GTF2F1,GTF2H2,GTF2H4,KAT2B,KAT7,MRAS,NCOA1,NCOA2,PRKACA,PRKAG1,PRKAR1B,PRKCA,REL,TAF13,TAF2,TAF3,TAF4B,TAF5L,TBP,TGFB1I1
WNT/Ca+ pathway	2	0.227	2.138	ATF2,CREB3,CREB3L3,DVL2,FZD9,NFATC2,NFATC4,PLCD1,PLCG2,PLCL1,PLCL2,PRKCA,REL,SMO,WNT5B
Epithelial Adherens Junction Signaling	1.98	0.186	1.3	ACVR1B,ARHGEF17,CDH1,CFL2,DLL1,FARP2,FER,HGF,KIF23,MAGI2,MET,MRAS,NANOS1,NECTIN3,NF2,NOTCH2,NOTCH3,NRAS,PAK1,PRKAA1,PRKAA2,PRKAG1,RACGAP1,RAP2B,RAPGEF1,RASD1,Tcf7,TGFB2,WAS
Glioma Signaling	1.98	0.195	1.291	CAMK2B,CDKN2B,CDKN2D,E2F1,E2F7,HDAC6,HDAC9,IDH1,IGF1,IGF2,MAP2K1,MRAS,NRAS,PDGFB,PIK3C3,PIK3CA,PIK3CB,PIK3CG,PLCG2,PRKCA,RAP2B,RASD1,SIN3A,SOS1
Acute Myeloid Leukemia Signaling	1.98	0.209	1.291	BRAF,IDH1,KIT,KITLG,MAP2K1,MAP2K7,MRAS,NRAS,PIK3C3,PIK3CA,PIK3CB,PIK3CG,PML,RAP2B,RASD1,REL,RUNX1,SOS1,Tcf7
IL-3 Signaling	1.95	0.215	1.5	CHP1,IL3RA,INPP5D,MAP2K1,MRAS,NRAS,PAK1,PIK3C3,PIK3CA,PIK3CB,PIK3CG,PPP3CC,PRKCA,RAP2B,RAPGEF1,RASD1,SOS1
Lymphotoxin β Receptor Signaling	1.94	0.236	0.905	CYC1,ELP1,EP300,IKBKE,LTB,LTBR,PIK3C3,PIK3CA,PIK3CB,PIK3CG,TRAF2,TRAF4,TRAF6
PDGF Signaling	1.91	0.209	1.213	EIF2AK2,INPP5D,INPP5F,INPP5J,MAP2K1,MRAS,NRAS,PDGFB,PIK3C3,PIK3CA,PIK3CB,PIK3CG,PLCG2,PRKCA,RAP2B,RASD1,SOS1,SRF
Role of BRCA1 in DNA Damage Response	1.9	0.212	-1.508	ARID2,ATR,ATRIP,BRCA2,DPF1,E2F1,E2F7,FAAP24,FANCC,FANCM,MDC1,MLH1,MRE11,POU2F1,SLC19A1,SMARCB1,SMARCD2
HGF Signaling	1.88	0.189	1.342	ATF2,HGF,ITGA2B,ITGA3,ITGB3,ITGB5,MAP2K1,MAP2K7,MAP3K3,MAP3K4,MET,MRAS,NRAS,PAK1,PIK3C3,PIK3CA,PIK3CB,PIK3CG,PLCG2,PRKCA,PTGS2,RAP2B,RAPGEF1,RASD1,SOS1
Assembly of RNA Polymerase II Complex	1.88	0.24	1.155	CCNH,ERCC3,GTF2E1,GTF2F1,GTF2H2,GTF2H4,TAF13,TAF2,TAF3,TAF4B,TAF5L,TBP
Glutamate Degradation III (via 4-aminobutyrate)	1.85	0.6	#NUM!	ABAT,ALDH5A1,SUCLG2
Dolichol and Dolichyl Phosphate Biosynthesis	1.84	1	#NUM!	DHDDS,DOLK
S-methyl-5-thio-α-D-ribose 1-phosphate Degradation	1.84	1	#NUM!	APIP,MRI1
Fatty Acid Biosynthesis Initiation II	1.84	1	#NUM!	FASN,OXSM
Glycine Biosynthesis I	1.84	1	#NUM!	SHMT1,SHMT2
SNARE Signaling Pathway	1.84	0.188	0.6	ADCY6,ADCY7,CAMK2B,DNAJC5,GOSR1,GPAA1,MYH11,MYH3,MYL1,MYL4,MYO10,MYO5C,NAPB,NAPG,PRKACA,PRKAG1,PRKAR1B,SNCG,STX1A,STX1B,STXBP2,STXBP4,STXBP5,SYT12,SYT15
P2Y Purigenic Receptor Signaling Pathway	1.84	0.188	1.091	ADCY6,ADCY7,ATF2,CREB3,CREB3L3,ITGA2B,ITGB3,MAP2K1,MRAS,NRAS,PIK3C3,PIK3CA,PIK3CB,PIK3CG,PLCD1,PLCG2,PLCL1,PLCL2,PRKACA,PRKAG1,PRKAR1B,PRKCA,RAP2B,RASD1,REL
Apelin Cardiac Fibroblast Signaling Pathway	1.82	0.304	-0.378	APLN,APLNR,PRKAA1,PRKAA2,PRKAG1,SERPINE1,TGFB2
Endocannabinoid Developing Neuron Pathway	1.82	0.189	1.342	ADCY6,ADCY7,AKT1S1,ATF2,BRAF,CREB3,CREB3L3,GNAL,GNAO1,MAP2K1,MAP2K7,MAPK7,MRAS,NRAS,PIK3C3,PIK3CA,PIK3CB,PIK3CG,PRKACA,PRKAG1,PRKAR1B,RAP2B,RASD1,RPTOR
Role of CHK Proteins in Cell Cycle Checkpoint Control	1.81	0.228	-1.134	ATMIN,ATR,CDC25A,CLSPN,E2F1,E2F7,MDC1,MRE11,RAD1,RAD17,SLC19A1,TLK1,TLK2
Folate Transformations I	1.8	0.444	0	MTHFD2L,MTHFR,SHMT1,SHMT2
Hereditary Breast Cancer Signaling	1.79	0.184	#NUM!	ARID2,ATR,BRCA2,DDB2,DPF1,E2F1,EP300,FAAP24,FANCC,FANCM,HDAC6,HDAC9,MLH1,MRAS,MRE11,NRAS,PIK3C3,PIK3CA,PIK3CB,PIK3CG,RAP2B,RASD1,SLC19A1,SMARCB1,SMARCD2,WEE1
Integrin Signaling	1.78	0.171	1.095	ACTA1,ACTA2,ARF3,ARF6,BRAF,CAPN1,CAPN7,GSN,ITGA2B,ITGA3,ITGB3,ITGB5,MAP2K1,MRAS,NRAS,PAK1,PDGFB,PIK3C3,PIK3CA,PIK3CB,PIK3CG,PIKFYVE,PLCG2,RAP2B,RAPGEF1,RASD1,RHOBTB2,RHOF,RHOH,RHOT2,RHOU,SOS1,TSPAN5,TSPAN6,TSPAN7,WAS
Protein Ubiquitination Pathway	1.77	0.164	#NUM!	AMFR,ANAPC1,ANAPC2,BIRC3,BTRC,CBL,CDC34,CRYAB,CUL2,Dnajb3,DNAJC12,DNAJC25,DNAJC4,DNAJC5,HLA-A,MED20,MR1,NEDD4L,PAN2,PSMB9,PSMC6,PSMD2,SMO,SUGT1,TRAF6,UBE2E2,UBE2M,UBE2Q2,UBE3B,UBE4B,UCHL5,USP11,USP12,USP18,USP22,USP28,USP3,USP33,USP35,USP4,USP42,USP48,USP5,USP50,USP53
Cancer Drug Resistance By Drug Efflux	1.75	0.224	#NUM!	ABCB1,BRAF,FOXO3,MAP2K1,MRAS,NRAS,PDK1,PIK3CA,PIK3CB,PIK3CG,PTGS2,RAP2B,RASD1
Cardiac Hypertrophy Signaling (Enhanced)	1.74	0.15	0.367	ACE,ACVR1B,ADCY6,ADCY7,ADRB1,ATF2,CACNA1E,CAMK2B,CHP1,CLCF1,DVL2,Eda,EIF2B1,EIF4E,EP300,FGF23,FZD9,GDPD3,GNA14,HDAC6,HDAC9,IGF1,IKBKE,IL15,IL15RA,IL17RD,IL1R1,IL3RA,IL4R,INPP5F,ITGA2B,ITGA3,ITGB3,ITGB5,LTB,MAP2K1,MAP2K7,MAP3K3,MAP3K4,MAPK7,MPPED2,MRAS,NAPEPLD,NFATC2,NFATC4,NRAS,PDE10A,PDE12,PDE3A,PDE3B,PDE4A,PDE5A,PDE7A,PDE8B,PDK1,PIK3C3,PIK3CA,PIK3CB,PIK3CG,PLCD1,PLCG2,PLCL1,PLCL2,PNPLA8,PPP3CC,…
IL-1 Signaling	1.74	0.198	0	ADCY6,ADCY7,ELP1,GNA14,GNAL,GNAO1,GNAT1,GNAZ,IKBKE,IL1R1,IL1RAP,IRAK1,MAP2K7,MRAS,PRKACA,PRKAG1,PRKAR1B,REL,TRAF6
Death Receptor Signaling	1.74	0.198	0.775	ACTA1,ACTA2,BID,BIRC3,CASP7,CYC1,DFFA,DFFB,ELP1,IKBKE,MAP2K7,NAIP,Naip1 (includes others),PARP2,PARP4,PARP9,REL,TNKS,TRAF2
Role of Macrophages, Fibroblasts and Endothelial Cells in Rheumatoid Arthritis	1.7	0.159	#NUM!	ATF2,CAMK2B,CHP1,CREB3,CREB3L3,CSNK1D,CSNK1G1,DKK3,ELP1,FZD9,GNAO1,ICAM1,IGKC,IKBKE,IL15,IL1R1,IL1RAP,IRAK1,LRP1,LTB,LTBR,MAP2K1,MAP2K7,MRAS,NFATC2,NFATC4,NLK,NRAS,PDGFB,PIK3C3,PIK3CA,PIK3CB,PIK3CG,PLCD1,PLCG2,PLCL1,PLCL2,PPP3CC,PRKCA,RAP2B,RASD1,SFRP1,SMO,SOCS1,Tcf7,TLR2,TLR3,TRAF2,TRAF4,TRAF6,WNT2,WNT5B
TR/RXR Activation	1.7	0.202	#NUM!	ADRB1,BCL3,COL6A3,EP300,FASN,NCOA1,NCOA2,PDE3B,PIK3C3,PIK3CA,PIK3CB,PIK3CG,RXRB,SLC16A2,SLC2A1,SREBF2,SYT12
Tight Junction Signaling	1.69	0.174	#NUM!	ACTA1,ACTA2,CASK,CLDN11,CLDN23,CPSF3,CPSF4,CSTF3,GOSR1,GPAA1,JAM2,JAM3,MAGI2,MYH11,MYH3,MYL1,MYL4,MYO10,MYO5C,NAPB,NAPG,NECTIN3,NUDT21,PARD6A,PRKACA,PRKAG1,PRKAR1B,REL,STX1A,STX1B,TGFB2
RHOGDI Signaling	1.69	0.169	-0.6	ACTA1,ACTA2,ARHGAP6,ARHGEF10,ARHGEF17,ARHGEF5,ARHGEF6,CDH1,CDH24,CDH4,CFL2,EP300,GNA14,GNAL,GNAO1,GNAT1,GNAZ,ITGA2B,ITGA3,ITGB3,ITGB5,MRAS,MYH11,MYH3,MYL1,MYL4,PAK1,PIKFYVE,PIP4K2A,PIP4K2B,PRKCA,RHOBTB2,RHOF,RHOH,RHOT2,RHOU
Colorectal Cancer Metastasis Signaling	1.69	0.163	0.354	ADCY6,ADCY7,BRAF,CDH1,FZD9,GNA14,GNAL,GNAO1,GNAT1,GNAZ,LRP1,MAP2K1,MLH1,MMP15,MMP2,MRAS,MSH3,NRAS,PIK3C3,PIK3CA,PIK3CB,PIK3CG,PRKACA,PRKAG1,PRKAR1B,PTGER2,PTGS2,RAP2B,RASD1,REL,RHOBTB2,RHOF,RHOH,RHOT2,RHOU,SIAH1,SMO,SOS1,Tcf7,TGFB2,TLR2,TLR3,WNT2,WNT5B
Ephrin A Signaling	1.68	0.234	#NUM!	CFL2,EFNA2,EFNA4,EPHA2,EPHA4,PAK1,PIK3C3,PIK3CA,PIK3CB,PIK3CG,VAV3
Neurotrophin/TRK Signaling	1.68	0.205	1.807	ATF2,BDNF,CREB3,CREB3L3,KLK3,MAP2K1,MAP2K7,MRAS,NRAS,PIK3C3,PIK3CA,PIK3CB,PIK3CG,RAP2B,RASD1,SOS1
Synaptic Long Term Potentiation	1.66	0.183	1.043	ATF2,CAMK2B,CHP1,CREB3,CREB3L3,EP300,GNA14,GRIA2,GRIA3,GRIN2D,MAP2K1,MRAS,NRAS,PLCD1,PLCG2,PLCL1,PLCL2,PPP3CC,PRKACA,PRKAG1,PRKAR1B,PRKCA,RAP2B,RASD1
p53 Signaling	1.65	0.194	0.277	ATR,CCNK,COQ8A,CSNK1D,DRAM1,E2F1,EP300,HDAC9,KAT2B,PERP,PIAS1,PIK3C3,PIK3CA,PIK3CB,PIK3CG,PML,SERPINE2,TIGAR,TP53INP1
Endometrial Cancer Signaling	1.63	0.217	0.905	CDH1,FOXO3,MAP2K1,MLH1,MRAS,NRAS,PIK3C3,PIK3CA,PIK3CB,PIK3CG,RAP2B,RASD1,SOS1
Thyroid Cancer Signaling	1.63	0.203	1	BDNF,BRAF,CDH1,IGF1,KLK3,MAP2K1,MRAS,NRAS,PDK1,PIK3C3,PIK3CA,PIK3CB,PIK3CG,RAP2B,RASD1,Tcf7
Prostanoid Biosynthesis	1.63	0.4	1	HPGDS,PTGES,PTGIS,PTGS2
CD40 Signaling	1.59	0.209	1.155	ELP1,ICAM1,IKBKE,MAP2K1,MAP2K7,PIK3C3,PIK3CA,PIK3CB,PIK3CG,PTGS2,REL,TNFAIP3,TRAF2,TRAF6
Cell Cycle: G1/S Checkpoint Regulation	1.59	0.209	-1.265	ATR,BTRC,CCNE2,CDC25A,CDC34,CDKN2B,CDKN2D,E2F1,E2F7,HDAC6,HDAC9,RPL5,SIN3A,TGFB2
Non-Small Cell Lung Cancer Signaling	1.58	0.194	1.155	E2F1,FOXO3,HDAC6,HDAC9,MAP2K1,MRAS,NRAS,PIK3C3,PIK3CA,PIK3CB,PIK3CG,PRKCA,RAP2B,RARB,RASD1,RXRB,SIN3A,SOS1
Telomere Extension by Telomerase	1.58	0.333	#NUM!	MRE11,POT1,TERF1,TNKS,XRCC6
Estrogen-Dependent Breast Cancer Signaling	1.58	0.2	1.508	AKR1B10,ATF2,CREB3,CREB3L3,HSD17B11,HSD17B7,IGF1,MRAS,NRAS,PIK3C3,PIK3CA,PIK3CB,PIK3CG,RAP2B,RASD1,REL
Apelin Endothelial Signaling Pathway	1.55	0.177	0	ADCY6,ADCY7,ANGPT1,APLN,APLNR,GNA14,GNAL,GNAO1,GNAT1,GNAZ,ICAM1,MAP2K1,MRAS,NRAS,PIK3C3,PIK3CA,PIK3CB,PIK3CG,PRKAA1,PRKAA2,PRKAG1,PRKCA,RAP2B,RASD1,REL
Germ Cell-Sertoli Cell Junction Signaling	1.54	0.172	#NUM!	ACTA1,ACTA2,CDH1,CFL2,FER,GSN,ITGA3,MAP2K1,MAP2K7,MAP3K3,MAP3K4,MRAS,NECTIN3,NRAS,PAK1,PIK3C3,PIK3CA,PIK3CB,PIK3CG,RAP2B,RASD1,RHOBTB2,RHOF,RHOH,RHOT2,RHOU,TGFB2,TUBA1C,TUBB2B
Renin-Angiotensin Signaling	1.53	0.182	0.243	ACE,ADCY6,ADCY7,ATF2,MAP2K1,MRAS,NRAS,PAK1,PIK3C3,PIK3CA,PIK3CB,PIK3CG,PLCG2,PRKACA,PRKAG1,PRKAR1B,PRKCA,PTGER2,RAP2B,RASD1,REL,SOS1
D-myo-inositol (1,4,5)-Trisphosphate Biosynthesis	1.53	0.269	0.378	PI4K2A,PI4K2B,PIKFYVE,PIP4K2A,PIP4K2B,PLCD1,PLCG2
STAT3 Pathway	1.52	0.178	-1.147	BMP6,CDC25A,CISH,FLT1,HGF,IGF1,IL15RA,IL17RD,IL1R1,IL3RA,IL4R,MAP2K1,MRAS,NRAS,PDGFB,PTPN2,RAP2B,RASD1,SOCS1,SOCS2,SOCS5,SOCS6,SOCS7,TGFB2
Endothelin-1 Signaling	1.51	0.168	2.191	ADCY6,ADCY7,BRAF,CASP7,GNA14,GNAL,GNAO1,GNAT1,GNAZ,MAPK7,MRAS,NAPEPLD,NRAS,PIK3C3,PIK3CA,PIK3CB,PIK3CG,PLA2G5,PLB1,PLCD1,PLCG2,PLCL1,PLCL2,PLD1,PNPLA8,PRDX6,PRKCA,PTGER2,PTGS2,RAP2B,RASD1,SOS1
Semaphorin Neuronal Repulsive Signaling Pathway	1.51	0.174	-0.6	CFL2,CSPG4,FARP2,ITGA2B,ITGA3,ITGB3,ITGB5,MAP2K1,MAP2K7,MYL1,MYL4,NRP1,PAK1,PDE4A,Pde4d,PIK3C3,PIK3CA,PIK3CB,PIK3CG,PLCG2,PLXNA1,PRKACA,PRKAG1,PRKAR1B,PRKG1,SEMA6D
CNTF Signaling	1.51	0.214	2.111	MAP2K1,MRAS,NRAS,PIK3C3,PIK3CA,PIK3CB,PIK3CG,RAP2B,RASD1,RPS6KA2,RPS6KA5,SOS1
CLEAR Signaling Pathway	1.5	0.158	0.447	AKT1S1,ATF2,ATP6V0A1,ATP6V0E2,BMP6,BNIP3,CHP1,CREB3,CREB3L3,CRTC2,DEPDC5,EP300,FLT1,GAA,HGF,IFI30,IGF1,MAPK7,MITF,MRAS,NAGLU,NPRL2,NPRL3,NRAS,PDGFB,PML,PPP3CC,PRKAA1,PRKAA2,PRKAG1,PRKCA,RAP2B,RASD1,RPTOR,SGSH,SLC36A1,SLC38A9,SUMF1,TCIRG1,TGFB2,TLR2,TLR3,TSC1,VPS11,VPS33A
BER (Base Excision Repair) Pathway	1.49	0.227	1.897	ARL6IP5,E2F1,LIG1,MAP2K1,MAP2K7,MPG,NF1,NTHL1,SLC19A1,SMUG1
Acute Phase Response Signaling	1.48	0.168	0.209	AHSG,CFB,ELP1,HMOX2,IKBKE,IL1R1,IL1RAP,IRAK1,MAP2K1,MAP2K7,MRAS,NRAS,OSMR,PIK3CA,PIK3CB,PIK3CG,RAP2B,RASD1,RBP2,REL,SERPINE1,SERPING1,SOCS1,SOCS2,SOCS5,SOCS6,SOCS7,SOS1,TRAF2,TRAF6,VWF
GM-CSF Signaling	1.44	0.2	2.309	CAMK2B,CISH,MAP2K1,MRAS,NRAS,PIK3C3,PIK3CA,PIK3CB,PIK3CG,PPP3CC,RAP2B,RASD1,RUNX1,SOS1
Amyloid Processing	1.44	0.216	-1.342	APH1B,Aph1c,CAPN1,CAPN7,CSNK1D,MARK1,NCSTN,PRKACA,PRKAG1,PRKAR1B,PSEN1
Apelin Adipocyte Signaling Pathway	1.43	0.189	0	ADCY6,ADCY7,APLN,APLNR,CAT,GPX7,GSTZ1,LIPE,MAPK7,NCF2,PRDX6,PRKAA1,PRKAA2,PRKACA,PRKAG1,PRKAR1B,PTGES
Estrogen Receptor Signaling	1.42	0.15	1.604	ADCY6,ADCY7,ATF2,CACNA1E,CCNC,CDK8,CFL2,CREB3,CREB3L3,CYC1,EIF2B1,EIF4E,EP300,FOXO3,GNA14,GNAL,GNAO1,GNAT1,GNAZ,IGF1,IGF2,MAP2K1,MED20,MED31,MED4,MED6,MMP15,MMP2,MRAS,MYL1,MYL4,NCOA1,NCOA2,NDUFA12,NDUFA4L2,NDUFAF1,NDUFB2,NRAS,PAK1,PELP1,PIK3C3,PIK3CA,PIK3CB,PIK3CG,PLCD1,PLCG2,PLCL1,PLCL2,PRKAA1,PRKAA2,PRKACA,PRKAG1,PRKAR1B,PRKCA,RAP2B,RASD1,REL,RUNX2,SOS1,TFAM,TRRAP
Role of Osteoblasts, Osteoclasts and Chondrocytes in Rheumatoid Arthritis	1.42	0.161	#NUM!	ADAM17,BIRC3,BMP6,BMP8A,CBL,CHP1,CSNK1D,CSNK1G1,DKK3,ELP1,FZD9,GSN,IGF1,IKBKE,IL1R1,IL1RAP,ITGB3,LRP1,MAP2K7,NAIP,Naip1 (includes others),NFATC2,NFATC4,PIK3C3,PIK3CA,PIK3CB,PIK3CG,PPP3CC,RUNX2,SFRP1,SMO,Tcf7,TRAF2,TRAF6,WNT2,WNT5B
Reelin Signaling in Neurons	1.42	0.174	2.524	APOE,ARHGEF10,ARHGEF17,ARHGEF26,ARHGEF28,ARHGEF5,ARHGEF6,CAMK2B,DNAH10,GRIN2D,ITGA3,LCK,LRP8,MAP2K1,MAP2K7,NECTIN3,PDK1,PDK4,PIK3C3,PIK3CA,PIK3CB,PIK3CG,RAPGEF1,VLDLR
Ephrin Receptor Signaling	1.41	0.163	2.558	ABI1,ANGPT1,ATF2,CFL2,CREB3,CREB3L3,EFNA2,EFNA4,EPHA2,EPHA4,EPHB1,GNA14,GNAL,GNAO1,GNAT1,GNAZ,GRIN2D,ITGA2B,ITGA3,ITGB3,ITGB5,ITSN1,MAP2K1,MRAS,NRAS,PAK1,PDGFB,PIK3CG,RAP2B,RAPGEF1,RASD1,SOS1,WAS
Ascorbate Recycling (Cytosolic)	1.4	0.667	#NUM!	GSTO1,GSTO2
Geranylgeranyldiphosphate Biosynthesis	1.4	0.667	#NUM!	COX10,GGPS1
1D-myo-inositol Hexakisphosphate Biosynthesis V (from Ins(1,3,4)P3)	1.4	0.667	#NUM!	IPMK,IPPK
Ethanol Degradation IV	1.4	0.273	0	ALDH3A2,ALDH7A1,ALDH9A1,CAT,CYGB,GPX7
Superpathway of Serine and Glycine Biosynthesis I	1.38	0.429	#NUM!	SHMT1,SHMT2,UBAC2
VEGF Signaling	1.38	0.184	1.604	ACTA1,ACTA2,EIF1AX,EIF2B1,FLT1,FOXO3,MAP2K1,MRAS,NRAS,PIK3C3,PIK3CA,PIK3CB,PIK3CG,PLCG2,PRKCA,RAP2B,RASD1,SOS1
Superpathway of Inositol Phosphate Compounds	1.38	0.159	1.859	CDC25A,DUSP10,DUSP12,DUSP16,FIG4,HACD2,INPP5A,INPP5D,INPP5E,INPP5F,INPP5J,IP6K3,IPMK,IPPK,ITPKC,NOCT,NT5C,NUDT11,PDCD1,PI4K2A,PI4K2B,PIK3C3,PIK3CA,PIK3CB,PIK3CG,PIKFYVE,PIP4K2A,PIP4K2B,PLCD1,PLCG2,PPIP5K2,PPM1K,PPP1R8,PPP3CC,PTPN2,PTPRF,STYX
Induction of Apoptosis by HIV1	1.37	0.2	0.632	BAK1,BID,BIRC3,CYC1,DFFA,DFFB,ELP1,IKBKE,MAP2K7,NAIP,Naip1 (includes others),REL,TRAF2
Pyridoxal 5'-phosphate Salvage Pathway	1.37	0.2	1.387	BRAF,CDK8,CSNK1D,EIF2AK2,FAM20B,GRK4,HIPK1,IRAK1,MAP2K1,MAPK7,PAK1,PRKAA1,PRKAA2
LPS-stimulated MAPK Signaling	1.36	0.188	1.387	ATF2,ELP1,IKBKE,MAP2K1,MRAS,NRAS,PAK1,PIK3C3,PIK3CA,PIK3CB,PIK3CG,PRKCA,RAP2B,RASD1,REL,SRF
Gα12/13 Signaling	1.36	0.173	2.236	CDH1,CDH24,CDH4,ELP1,IKBKE,LPAR4,MAP2K1,MAP2K7,MAPK7,MRAS,MYL1,MYL4,NRAS,PIK3C3,PIK3CA,PIK3CB,PIK3CG,RAP2B,RASD1,REL,TBXA2R,TEC,VAV3
Cleavage and Polyadenylation of Pre-mRNA	1.34	0.333	#NUM!	CPSF3,CPSF4,CSTF3,NUDT21
Prostate Cancer Signaling	1.33	0.177	#NUM!	ATF2,CCNE2,CREB3,CREB3L3,E2F1,HDAC6,HDAC9,KLK3,MAP2K1,MRAS,NRAS,PIK3C3,PIK3CA,PIK3CB,PIK3CG,RAP2B,RASD1,REL,SIN3A,SOS1
Phospholipases	1.33	0.197	2.714	LIPG,NAPEPLD,PLA1A,PLA2G15,PLA2G5,PLB1,PLCD1,PLCG2,PLCL1,PLCL2,PLD1,PNPLA8,PRDX6
Th1 Pathway	1.33	0.175	0.728	APH1B,Aph1c,DLL1,HLA-A,HLA-DMA,HLA-DQA1,HLA-DQB1,ICAM1,IRF1,NCSTN,NFATC2,NFATC4,NOTCH2,NOTCH3,PIK3C3,PIK3CA,PIK3CB,PIK3CG,PSEN1,RUNX3,SOCS1
Cellular Effects of Sildenafil (Viagra)	1.33	0.169	#NUM!	ACTA1,ACTA2,ADCY6,ADCY7,CACNA1E,KCNN4,MYH11,MYH3,MYL1,MYL4,MYO10,MYO5C,PABPC4,PDE3A,PDE3B,PDE4A,PDE5A,PLCD1,PLCG2,PLCL1,PLCL2,PRKACA,PRKAG1,PRKAR1B,PRKG1
Opioid Signaling Pathway	1.33	0.155	2	ADCY6,ADCY7,AP1B1,AP2A1,ATF2,BRAF,CACNA1E,CAMK2B,CATSPER2,CREB3,CREB3L3,EP300,GNA14,GNAL,GNAO1,GNAT1,GNAZ,GRIN2D,GRK4,LCK,MAP2K1,MAP2K7,MAPK7,MRAS,NRAS,OGFR,PDK1,PIK3CG,PPP3CC,PRKACA,PRKAG1,PRKAR1B,PRKCA,RAP2B,RASD1,RGS12,RGS19,RGS6,RPS6KA2,RPS6KA5,SCN7A,SOS1,SRF
α-Adrenergic Signaling	1.3	0.178	0.707	ADCY6,ADCY7,GNA14,GNAL,GNAO1,GNAT1,GNAZ,MAP2K1,MRAS,NRAS,PHKG1,PLCG2,PRKACA,PRKAG1,PRKAR1B,PRKCA,RAP2B,RASD1,SLC8A1
ILK Signaling	1.3	0.161	1.961	ACTA1,ACTA2,ARHGEF6,ATF2,CDH1,CFL2,CREB3,CREB3L3,FBLIM1,ITGB3,ITGB5,LIMS2,MYH11,MYH3,MYL1,MYL4,MYO10,MYO5C,PIK3C3,PIK3CA,PIK3CB,PIK3CG,PTGS2,REL,RHOBTB2,RHOF,RHOH,RHOT2,RHOU,RPS6KA5,TESK1,TGFB1I1
PPAR Signaling	1.3	0.178	0	ELP1,EP300,IKBKE,IL1R1,IL1RAP,MAP2K1,MRAS,NCOA1,NR1H3,NRAS,PDGFB,PPARD,PTGS2,RAP2B,RASD1,REL,SOS1,TRAF2,TRAF6
Adrenomedullin signaling pathway	1.3	0.161	0.756	ADCY6,ADCY7,BRAF,CRCP,GAST,GNA14,KCNN4,MAP2K1,MAP2K7,MAPK7,MMP2,MRAS,NPR3,NRAS,NT5C,PIK3C3,PIK3CA,PIK3CB,PIK3CG,PLCD1,PLCG2,PLCL1,PLCL2,PRKACA,PRKAG1,PRKAR1B,PRKG1,RAP2B,RASD1,REL,RXRB,SOS1
Superpathway of Cholesterol Biosynthesis	1.29	0.241	1.633	ACAA2,CYP51A1,GGPS1,HMGCR,HSD17B7,MVD,SC5D
IL-9 Signaling	1.29	0.229	1.342	BCL3,CISH,PIK3C3,PIK3CA,PIK3CB,PIK3CG,REL,SOCS2
Regulation Of The Epithelial Mesenchymal Transition In Development Pathway	1.28	0.184	1.155	ADAM17,APH1B,Aph1c,BCL9,CDH1,DVL2,FZD9,NCSTN,PSEN1,PYGO1,REL,S100A4,SMO,Tcf7,WNT2,WNT5B
Glucocorticoid Receptor Signaling	1.27	0.143	#NUM!	ARID2,CCNH,CHP1,CXCL3,CYC1,DNAH10,DPF1,ELP1,EP300,ERCC3,FOXO3,GTF2E1,GTF2F1,GTF2H2,GTF2H4,H2-T24,HLA-A,HLA-DMA,HLA-DQA1,HLA-DQB1,ICAM1,IGF1,IKBKE,IL15RA,IL17RD,IL1R1,IL3RA,IL4R,KAT2B,KRT8,KRT80,MAP2K1,MAP2K7,MMP2,MRAS,NCOA1,NCOA2,NDUFA12,NDUFA4L2,NDUFAF1,NDUFB2,NFATC2,NFATC4,NRAS,PCK2,PDK4,PIK3C3,PIK3CA,PIK3CB,PIK3CG,PLA2G5,PPP3CC,PRKAA1,PRKAA2,PRKACA,PRKAG1,PTGS2,RAP2B,RARB,RASD1,RPS6KA5,RXRB,SC…
Ovarian Cancer Signaling	1.27	0.166	0.277	BRAF,BRCA2,E2F1,FZD9,HDAC6,HDAC9,MAP2K1,MLH1,MMP2,MRAS,NRAS,PIK3C3,PIK3CA,PIK3CB,PIK3CG,PRKACA,PRKAG1,PRKAR1B,PTGS2,RAP2B,RASD1,SIN3A,SMO,Tcf7,WNT2,WNT5B
Neuropathic Pain Signaling In Dorsal Horn Neurons	1.27	0.178	0.943	BDNF,CAMK2B,GRIA2,GRIA3,GRIN2D,KCNN4,PIK3C3,PIK3CA,PIK3CB,PIK3CG,PLCD1,PLCG2,PLCL1,PLCL2,PRKACA,PRKAG1,PRKAR1B,PRKCA
PTEN Signaling	1.27	0.167	-0.943	CBL,ELP1,FLT1,FOXO3,IKBKE,INPP5D,INPP5F,INPP5J,ITGA2B,ITGA3,ITGB3,ITGB5,MAGI2,MAP2K1,MCRS1,MRAS,NRAS,PIK3CA,PIK3CB,PIK3CG,RAP2B,RASD1,REL,SHARPIN,SOS1
Amyotrophic Lateral Sclerosis Signaling	1.26	0.174	-0.229	BID,BIRC3,CACNA1E,CAPN1,CAPN7,CASP7,CAT,GRIA2,GRIA3,GRIK3,GRIN2D,IGF1,NAIP,Naip1 (includes others),PAK1,PIK3C3,PIK3CA,PIK3CB,PIK3CG,RAB5B
Superpathway of Geranylgeranyldiphosphate Biosynthesis I (via Mevalonate)	1.26	0.278	0	ACAA2,COX10,GGPS1,HMGCR,MVD
IL-2 Signaling	1.25	0.197	2.111	LCK,MAP2K1,MRAS,NRAS,PIK3C3,PIK3CA,PIK3CB,PIK3CG,RAP2B,RASD1,SOCS1,SOS1
HMGB1 Signaling	1.25	0.164	1.147	CLCF1,Eda,ICAM1,IL15,IL1R1,KAT2B,KAT7,LTB,MAP2K1,MAP2K7,MRAS,NRAS,PIK3C3,PIK3CA,PIK3CB,PIK3CG,PLAT,RAP2B,RASD1,REL,RHOBTB2,RHOF,RHOH,RHOT2,RHOU,SERPINE1,TGFB2
Tumoricidal Function of Hepatic Natural Killer Cells	1.23	0.25	-0.447	BID,CASP7,DFFA,DFFB,ICAM1,PRF1
Sphingomyelin Metabolism	1.22	0.375	#NUM!	SGMS2,SMPD2,SMPD4
Phagosome Maturation	1.22	0.164	#NUM!	ATP6V0A1,ATP6V0E2,CTSH,CTSO,DYNC2H1,DYNLT1,GOSR1,GPAA1,HLA-A,MR1,NAPB,NAPG,NCF2,PIK3C3,PIKFYVE,PRDX6,RAB5B,STX1A,STX1B,TCIRG1,TUBA1C,TUBB2B,VPS11,VPS33A,VPS37A,VPS39
RAR Activation	1.2	0.158	#NUM!	ADCY6,ADCY7,AKR1B10,ARID2,CCNH,DPF1,EP300,ERCC3,GTF2H2,GTF2H4,IGFBP3,IL3RA,KAT2B,MAP2K1,NCOA1,PIK3CA,PIK3CB,PIK3CG,PML,PRKACA,PRKAG1,PRKAR1B,PRKCA,RARB,RBP2,RDH13,REL,RXRB,SMARCB1,SMARCD2,SORBS3,TGFB2
Salvage Pathways of Pyrimidine Ribonucleotides	1.2	0.177	1.698	AK4,APOBEC1,APOBEC2,BRAF,CDK8,CSNK1D,EIF2AK2,FAM20B,GRK4,HIPK1,IRAK1,MAP2K1,MAPK7,NME1,PAK1,PRKAA1,PRKAA2
fMLP Signaling in Neutrophils	1.2	0.168	1.291	CHP1,GNA14,GNAL,GNAO1,GNAT1,GNAZ,MAP2K1,MRAS,NCF2,NFATC2,NFATC4,NRAS,PIK3C3,PIK3CA,PIK3CB,PIK3CG,PPP3CC,PRKCA,RAP2B,RASD1,REL,WAS
PAK Signaling	1.2	0.171	1.291	ARHGEF6,CFL2,ITGA2B,ITGA3,ITGB3,ITGB5,MAP2K1,MRAS,MYL1,MYL4,NRAS,PAK1,PDGFB,PIK3C3,PIK3CA,PIK3CB,PIK3CG,RAP2B,RASD1,SOS1
Kinetochore Metaphase Signaling Pathway	1.2	0.173	2.138	ANAPC1,ANAPC13,ANAPC2,ARPP19,CDC16,CENPA,CENPC,CENPL,CENPQ,CENPU,DNAH10,INCENP,MAD2L1,NDC80,PMF1/PMF1-BGLAP,SKA2,SPC24,SPDL1,ZW10
Angiopoietin Signaling	1.18	0.184	0.707	ANGPT1,ELP1,IKBKE,MRAS,NRAS,PAK1,PIK3C3,PIK3CA,PIK3CB,PIK3CG,RAP2B,RASD1,REL,SOS1
Type II Diabetes Mellitus Signaling	1.18	0.163	0.905	ACSF2,ACSL3,ACSL4,CACNA1E,CATSPER2,IKBKE,MAP2K7,NSMAF,PIK3C3,PIK3CA,PIK3CB,PIK3CG,PRKAA1,PRKAA2,PRKAG1,PRKCA,REL,SMPD2,SMPD4,SOCS1,SOCS2,SOCS5,SOCS6,SOCS7,TRAF2
Cyclins and Cell Cycle Regulation	1.18	0.181	0.632	ATR,BTRC,CCNE2,CCNH,CDC25A,CDC34,CDKN2B,CDKN2D,E2F1,E2F7,HDAC6,HDAC9,SIN3A,TGFB2,WEE1
γ-linolenate Biosynthesis II (Animals)	1.17	0.263	1	ACSF2,ACSL3,ACSL4,FADS1,FADS2
Thrombopoietin Signaling	1.17	0.19	1.508	MAP2K1,MRAS,NRAS,PIK3C3,PIK3CA,PIK3CB,PIK3CG,PLCG2,PRKCA,RAP2B,RASD1,SOS1
Cell Cycle: G2/M DNA Damage Checkpoint Regulation	1.16	0.2	-1.414	ATR,AURKA,BORA,BTRC,CDC34,CKS2,EP300,KAT2B,PPM1D,WEE1
MSP-RON Signaling In Cancer Cells Pathway	1.15	0.164	1.528	ACTA2,ATF2,BRAF,CREB3,CREB3L3,HGFAC,IL3RA,KLK3,KLK8,MAP2K1,MET,MRAS,NRAS,PIK3C3,PIK3CA,PIK3CB,PIK3CG,RAP2B,RASD1,REL,RPS6KA2,SOS1,Tcf7
Gαq Signaling	1.14	0.16	1.528	CHP1,CHRM3,GNA14,GNAL,GNAO1,GNAT1,GNAZ,IKBKE,MAP2K1,MRAS,NAPEPLD,NFATC2,NFATC4,PIK3C3,PIK3CA,PIK3CB,PIK3CG,PLCG2,PLD1,PPP3CC,PRKCA,REL,RHOBTB2,RHOF,RHOH,RHOT2,RHOU
VEGF Family Ligand-Receptor Interactions	1.14	0.179	1.387	FLT1,MAP2K1,MRAS,NRAS,NRP1,PIK3C3,PIK3CA,PIK3CB,PIK3CG,PLA2G5,PLCG2,PRKCA,RAP2B,RASD1,SOS1
PRPP Biosynthesis I	1.14	0.5	#NUM!	PRPS1,PRPS2
Phenylethylamine Degradation I	1.14	0.5	#NUM!	ALDH3A2,AOC3
Methylmalonyl Pathway	1.14	0.5	#NUM!	MMUT,PCCB
Glutathione Redox Reactions II	1.14	0.5	#NUM!	GSR,TXNDC12
Proline Biosynthesis I	1.14	0.5	#NUM!	ALDH18A1,PYCR2
Fatty Acid β-oxidation III (Unsaturated, Odd Number)	1.14	0.5	#NUM!	ECI1,ECI2
Sphingosine-1-phosphate Signaling	1.14	0.168	1.414	ADCY6,ADCY7,CASP7,NAAA,PDGFB,PIK3C3,PIK3CA,PIK3CB,PIK3CG,PLCD1,PLCG2,PLCL1,PLCL2,RHOBTB2,RHOF,RHOH,RHOT2,RHOU,SMPD2,SMPD4
Role of NFAT in Cardiac Hypertrophy	1.13	0.154	1.3	ADCY6,ADCY7,CABIN1,CACNA1E,CAMK2B,CATSPER2,CHP1,EP300,HDAC6,HDAC9,IGF1,MAP2K1,MAP2K7,MRAS,NFATC4,NRAS,PIK3C3,PIK3CA,PIK3CB,PIK3CG,PLCD1,PLCG2,PLCL1,PLCL2,PPP3CC,PRKACA,PRKAG1,PRKAR1B,PRKCA,RAP2B,RASD1,SLC8A1,SOS1,TGFB2
Urate Biosynthesis/Inosine 5'-phosphate Degradation	1.12	0.286	0	IMPDH1,NT5C,NT5C2,NT5E
Adipogenesis pathway	1.12	0.164	#NUM!	AGPAT2,CCNH,CLOCK,EBF1,ERCC3,FABP4,FOXC2,FZD9,GTF2H2,GTF2H4,HDAC6,HDAC9,KAT2B,KAT7,KLF5,NFATC4,NOCT,SAP130,SAP30,SIN3A,SMO,ZNF423
14-3-3-mediated Signaling	1.11	0.165	2	AKT1S1,CBL,EDC3,MAP2K1,MRAS,NRAS,PIK3C3,PIK3CA,PIK3CB,PIK3CG,PLCD1,PLCG2,PLCL1,PLCL2,PRKCA,RAP2B,RASD1,TRAF2,TSC1,TUBA1C,TUBB2B
TNFR1 Signaling	1.11	0.196	-0.707	BID,BIRC3,CASP7,IKBKE,NAIP,Naip1 (includes others),PAK1,REL,TNFAIP3,TRAF2
UVC-Induced MAPK Signaling	1.11	0.196	-0.707	ATR,BRAF,MAP2K1,MRAS,NRAS,PRKCA,RAP2B,RASD1,SMPD2,SMPD4
VDR/RXR Activation	1.11	0.179	-0.333	CCNC,EP300,IGFBP3,IGFBP5,IGFBP6,MXD1,NCOA1,NCOA2,PPARD,PRKCA,RUNX2,RXRB,S100G,TGFB2
Protein Kinase A Signaling	1.11	0.144	0.42	ADCY6,ADCY7,ANAPC1,ANAPC13,ANAPC2,ATF2,BRAF,CAMK2B,CDC16,CDC25A,CHP1,CREB3,CREB3L3,DUSP10,DUSP12,DUSP16,DUSP22,GDPD3,H1-0,LIPE,MAP2K1,MPPED2,MYL1,MYL4,NAPEPLD,NFATC2,NFATC4,PDE10A,PDE12,PDE3A,PDE3B,PDE4A,PDE5A,PDE7A,PDE8B,PHKG1,PLCD1,PLCG2,PLCL1,PLCL2,PNPLA8,PPP3CC,PRKACA,PRKAG1,PRKAR1B,PRKCA,PTGS2,PTPDC1,PTPN2,PTPN4,PTPRA,Ptprd,PTPRF,PTPRS,REL,SMO,Tcf7,TGFB2
Regulation of Actin-based Motility by Rho	1.1	0.168	0.535	ACTA1,ACTA2,GSN,ITGA2B,ITGA3,ITGB3,ITGB5,MYL1,MYL4,PAK1,PIKFYVE,PIP4K2A,PIP4K2B,RHOBTB2,RHOF,RHOH,RHOT2,RHOU,WAS
Chronic Myeloid Leukemia Signaling	1.1	0.17	#NUM!	E2F1,E2F7,HDAC6,HDAC9,IKBKE,MAP2K1,MRAS,NRAS,PIK3C3,PIK3CA,PIK3CB,PIK3CG,RAP2B,RASD1,REL,SIN3A,SOS1,TGFB2
Apelin Cardiomyocyte Signaling Pathway	1.1	0.172	1.213	APLN,APLNR,CAT,MAPK7,MYL1,MYL4,PIK3C3,PIK3CA,PIK3CB,PIK3CG,PLCD1,PLCG2,PLCL1,PLCL2,PRKCA,SLC8A1,SLC9A6
Endocannabinoid Neuronal Synapse Pathway	1.1	0.161	1.964	ABHD6,ADCY6,ADCY7,CACNA1E,CATSPER2,CHP1,DNAH10,GNA14,GNAL,GNAO1,GRIA2,GRIA3,GRIN2D,MAPK7,NAPEPLD,PLCD1,PLCG2,PLCL1,PLCL2,PPP3CC,PRKACA,PRKAG1,PRKAR1B,PTGS2
TNFR2 Signaling	1.1	0.219	-1.342	BIRC3,IKBKE,NAIP,Naip1 (includes others),REL,TNFAIP3,TRAF2
Hepatic Fibrosis / Hepatic Stellate Cell Activation	1.09	0.155	#NUM!	ACTA2,COL15A1,COL3A1,COL4A5,COL6A2,COL6A3,CXCL3,FLT1,HGF,ICAM1,IGF1,IGF2,IGFBP3,IGFBP5,IL1R1,IL1RAP,IL4R,LY96,MET,MMP2,MYH11,MYH3,MYL1,MYL4,MYO10,MYO5C,PDGFB,REL,SERPINE1,TGFB2
MSP-RON Signaling Pathway	1.09	0.19	#NUM!	ACTA1,ACTA2,IL3RA,KLK3,KLK8,PIK3C3,PIK3CA,PIK3CB,PIK3CG,RPS6KA2,TLR2
Heme Biosynthesis II	1.08	0.333	#NUM!	ALAS1,HMBS,PPOX
IL-6 Signaling	1.08	0.164	1.886	ABCB1,ELP1,IKBKE,IL1R1,IL1RAP,MAP2K1,MAP2K7,MRAS,NRAS,PIK3C3,PIK3CA,PIK3CB,PIK3CG,RAP2B,RASD1,REL,SOCS1,SOS1,SRF,TRAF2,TRAF6
Tumor Microenvironment Pathway	1.08	0.156	0.392	BRAF,COL3A1,CSPG4,FGF23,FOXO3,HGF,HLA-A,ICAM1,IGF1,IGF2,ITGB3,MAP2K1,MMP15,MMP2,MRAS,NRAS,PDGFB,PIK3C3,PIK3CA,PIK3CB,PIK3CG,PTGS2,RAP2B,RASD1,REL,SLC2A1,TGFB2,TNC
Melatonin Signaling	1.07	0.181	0	BRAF,CAMK2B,GNAO1,MAP2K1,MAP2K7,PLCD1,PLCG2,PLCL1,PLCL2,PRKACA,PRKAG1,PRKAR1B,PRKCA
Ephrin B Signaling	1.07	0.181	1.508	ABI1,CBL,CFL2,EPHB1,GNA14,GNAL,GNAO1,GNAT1,GNAZ,ITSN1,MRAS,PAK1,VAV3
CDK5 Signaling	1.07	0.167	-1	ADCY6,ADCY7,BDNF,CABLES1,CAPN1,GNAL,ITGA3,LAMA2,LAMA5,LAMC1,MAP2K1,MAPK7,MRAS,NRAS,PRKACA,PRKAG1,PRKAR1B,RAP2B,RASD1
Paxillin Signaling	1.07	0.168	1.604	ACTA1,ACTA2,ARF6,ARHGEF6,ITGA2B,ITGA3,ITGB3,ITGB5,MRAS,NRAS,PAK1,PIK3C3,PIK3CA,PIK3CB,PIK3CG,RAP2B,RASD1,SOS1
BMP signaling pathway	1.07	0.174	-0.577	ATF2,BMP6,BMP8A,MAP2K1,MRAS,NRAS,PRKACA,PRKAG1,PRKAR1B,RAP2B,RASD1,REL,RUNX2,SOS1,ZNF423
G Beta Gamma Signaling	1.05	0.163	0.688	ARHGEF6,CACNA1E,CATSPER2,GNA14,GNAL,GNAO1,GNAT1,GNAZ,HBEGF,MRAS,NRAS,PAK1,PIK3CG,PLCG2,PRKACA,PRKAG1,PRKAR1B,PRKCA,RAP2B,RASD1,SOS1
Role of Tissue Factor in Cancer	1.04	0.165	#NUM!	CFL2,EIF4E,GNA14,HBEGF,ITGA3,ITGB3,LCK,MRAS,NRAS,PAK1,PIK3C3,PIK3CA,PIK3CB,PIK3CG,PRKCA,RAP2B,RASD1,RPS6KA2,RPS6KA5
Role of IL-17F in Allergic Inflammatory Airway Diseases	1.04	0.196	1.134	ATF2,CREB3,CREB3L3,IGF1,MAP2K1,REL,RPS6KA2,RPS6KA5,TRAF6
Eicosanoid Signaling	1	0.179	2	ALOX12,HPGDS,LTC4S,PLA2G5,PLB1,PNPLA8,PRDX6,PTGER2,PTGES,PTGIS,PTGS2,TBXA2R
Role of MAPK Signaling in the Pathogenesis of Influenza	1	0.173	#NUM!	ATF2,MAP2K1,MAP2K7,MRAS,NRAS,PLA2G5,PLB1,PNPLA8,PRDX6,PRKCA,PTGS2,RABGEF1,RAP2B,RASD1
cAMP-mediated signaling	0.996	0.149	-0.18	ADCY6,ADCY7,ADORA2A,ADRB1,APLNR,ATF2,BRAF,CAMK2B,CHRM3,CREB3,CREB3L3,GDPD3,GNAL,GNAO1,GRK4,MAP2K1,MPPED2,NAPEPLD,NPR3,PDE10A,PDE12,PDE3A,PDE3B,PDE4A,PDE5A,PDE7A,PDE8B,PKIB,PNPLA8,PPP3CC,PRKACA,PRKAR1B,PTGER2,RGS12,TBXA2R
Neuregulin Signaling	0.987	0.162	0.535	ADAM17,DCN,HBEGF,ITGA2B,ITGA3,ITGB3,ITGB5,MAP2K1,MRAS,NRAS,NRG2,PLCG2,PRKCA,PSEN1,RAP2B,RASD1,RNF41,RPS6,SOS1
Sperm Motility	0.979	0.147	1.5	BMX,CATSPER2,DDR1,EPHA2,EPHA4,EPHB1,FER,FLT1,GNA14,GNAL,GNAO1,GNAT1,GNAZ,KIT,LCK,MAP2K1,MAP2K7,MET,MRAS,NPPC,PDE4A,PLA2G5,PLB1,PLCD1,PLCG2,PLCL1,PLCL2,PNPLA8,PRDX6,PRKACA,PRKAG1,PRKAR1B,PRKCA,PRKG1,SLC12A2,TEC,TWF1
TGF-β Signaling	0.975	0.167	0.832	ACVR1B,EP300,INHBB,MAP2K1,MRAS,NRAS,RAP2B,RASD1,RUNX2,RUNX3,SERPINE1,SOS1,TGFB2,TRAF6,ZFYVE9,ZNF423
Mitochondrial Dysfunction	0.971	0.154	#NUM!	ACO2,APH1B,Aph1c,Atp5e,ATPAF1,CAT,COX10,COX4I2,COX7B,CPT1C,CYC1,DHODH,DMAC2L,GPX7,GSR,NCSTN,NDUFA12,NDUFA4L2,NDUFAF1,NDUFB2,PRDX3,PSEN1,RHOT2,SURF1,UQCR10,UQCR11
Dolichyl-diphosphooligosaccharide Biosynthesis	0.967	0.3	#NUM!	ALG1,DPM2,DPM3
Gαs Signaling	0.967	0.16	-0.775	ADCY6,ADCY7,ADORA2A,ADRB1,ATF2,BRAF,CHRM3,CREB3,CREB3L3,GNA14,GNAL,GNAO1,GNAT1,GNAZ,MAP2K1,MRAS,PRKACA,PRKAG1,PRKAR1B,PTGER2
Remodeling of Epithelial Adherens Junctions	0.967	0.176	-0.816	ACTA1,ACTA2,ARF6,CDH1,DNM3,HGF,HGS,MET,NME1,RAB5B,TUBA1C,TUBB2B
Role of p14/p19ARF in Tumor Suppression	0.959	0.214	-0.816	E2F1,PIK3C3,PIK3CA,PIK3CB,PIK3CG,SF3A1
Pentose Phosphate Pathway (Oxidative Branch)	0.951	0.4	#NUM!	G6PD,PGD
Tetrapyrrole Biosynthesis II	0.951	0.4	#NUM!	ALAS1,HMBS
Lysine Degradation II	0.951	0.4	#NUM!	AASDHPPT,ALDH7A1
Lysine Degradation V	0.951	0.4	#NUM!	AASDHPPT,ALDH7A1
2-oxobutanoate Degradation I	0.951	0.4	#NUM!	MMUT,PCCB
Rapoport-Luebering Glycolytic Shunt	0.951	0.4	#NUM!	BPGM,TIGAR
dTMP De Novo Biosynthesis	0.951	0.4	#NUM!	SHMT1,SHMT2
Folate Polyglutamylation	0.951	0.4	#NUM!	SHMT1,SHMT2
Cardiac β-adrenergic Signaling	0.936	0.152	-1.414	ADCY6,ADCY7,ADRB1,CACNA1E,GDPD3,GNA14,GNAL,GNAO1,GNAT1,GNAZ,MPPED2,MRAS,NAPEPLD,PDE10A,PDE12,PDE3A,PDE3B,PDE4A,PDE5A,PDE7A,PDE8B,PKIB,PNPLA8,PRKACA,PRKAG1,PRKAR1B,SLC8A1
Role of JAK1 and JAK3 in γc Cytokine Signaling	0.932	0.174	#NUM!	IL15,IL15RA,IL4R,MRAS,NRAS,PIK3C3,PIK3CA,PIK3CB,PIK3CG,RAP2B,RASD1,SOCS1
GDNF Family Ligand-Receptor Interactions	0.932	0.171	1.732	DOK3,DOK4,MAP2K1,MRAS,NRAS,PIK3C3,PIK3CA,PIK3CB,PIK3CG,PLCG2,RAP2B,RASD1,SOS1
Role of MAPK Signaling in Promoting the Pathogenesis of Influenza	0.928	0.161	1.698	ATF2,ATP6V0A1,ATP6V0E2,BRAF,MAP2K1,MAP2K7,MRAS,NRAS,PLA2G5,PLB1,PNPLA8,PRDX6,PRKCA,PTGS2,RABGEF1,RAP2B,RASD1,TCIRG1
Thio-molybdenum Cofactor Biosynthesis	0.921	1	#NUM!	MOCOS
Acyl Carrier Protein Metabolism	0.921	1	#NUM!	AASDHPPT
Thiamin Salvage III	0.921	1	#NUM!	TPK1
Asparagine Biosynthesis I	0.921	1	#NUM!	ASNS
Phosphatidylethanolamine Biosynthesis III	0.921	1	#NUM!	PTDSS2
Sulfite Oxidation IV	0.921	1	#NUM!	SUOX
April Mediated Signaling	0.914	0.19	0.816	ELP1,IKBKE,MAP2K7,NFATC2,NFATC4,REL,TRAF2,TRAF6
Sonic Hedgehog Signaling	0.903	0.207	0.816	DYRK1B,HHIP,PRKACA,PRKAG1,PRKAR1B,SMO
Antiproliferative Role of Somatostatin Receptor 2	0.9	0.169	1	BRAF,GAST,MAP2K1,MRAS,NPR3,NRAS,NT5C,PIK3C3,PIK3CA,PIK3CB,PIK3CG,RAP2B,RASD1
Cell Cycle Control of Chromosomal Replication	0.896	0.179	1.265	CDK10,CDK14,CDK8,LIG1,MCM6,ORC2,ORC4,ORC5,POLA2,PRIM1
ATM Signaling	0.886	0.162	0	ATF2,ATR,BID,CDC25A,CREB3,CREB3L3,MDC1,MRE11,PPM1D,RAD17,RNF8,SMC2,TDP1,TLK1,TLK2,TRRAP
Actin Nucleation by ARP-WASP Complex	0.879	0.163	1.265	ITGA2B,ITGA3,ITGB3,ITGB5,MRAS,NRAS,RAP2B,RASD1,RHOBTB2,RHOF,RHOH,RHOT2,RHOU,SOS1,WAS
Hepatic Fibrosis Signaling Pathway	0.876	0.138	0.98	ACTA2,ACVR1B,ATF2,BRAF,CACNA1E,CCDC88A,COL3A1,CREB3,CREB3L3,CSNK1D,CSNK1G1,DVL2,FLT1,FZD9,ICAM1,IKBKE,IL1R1,IL1RAP,IRAK1,ITGA2B,ITGA3,ITGB3,ITGB5,LRP1,MAP2K1,MAP2K7,MRAS,MYL1,MYL4,NCF2,NRAS,PDGFB,PDK1,PIK3C3,PIK3CA,PIK3CB,PIK3CG,PLCG2,PRKACA,PRKAG1,PRKAR1B,PRKCA,RAP2B,RASD1,REL,RHOBTB2,RHOF,RHOH,RHOT2,RHOU,SERPINE1,SMO,SOS1,Tcf7,TGFB2,TRAF6,WNT2,WNT5B
Oxytocin Signaling Pathway	0.873	0.143	0.48	ATF2,CACNA1E,CHP1,CREB3,CREB3L3,GAST,GNAL,GNAO1,KCNJ8,LIPE,MAPK7,MRAS,MYH11,MYH3,MYL1,MYL4,MYO10,MYO5C,NPR3,NRAS,NT5C,PIK3C3,PIK3CA,PIK3CB,PIK3CG,PLA2G5,PPARD,PPP3CC,PRKAA1,PRKAA2,PRKACA,PRKAG1,PRKAR1B,PRKCA,PRKG1,PTGS2,RAP2B,RASD1,REL,SOS1
B Cell Activating Factor Signaling	0.87	0.186	1.134	ELP1,IKBKE,MAP2K7,NFATC2,NFATC4,REL,TRAF2,TRAF6
Oncostatin M Signaling	0.87	0.186	1.134	CHI3L1,MAP2K1,MRAS,NRAS,OSMR,RAP2B,RASD1,SOS1
Assembly of RNA Polymerase I Complex	0.866	0.273	#NUM!	POLR1C,POLR1E,TBP
Pentose Phosphate Pathway	0.866	0.273	#NUM!	G6PD,PGD,TKT
IL-7 Signaling Pathway	0.866	0.167	1.265	BAK1,CDC25A,EBF1,FOXO3,HGF,MET,PIK3C3,PIK3CA,PIK3CB,PIK3CG,SLC2A1,SOCS1,SOS1
CD27 Signaling in Lymphocytes	0.86	0.175	1.414	BID,CYC1,ELP1,IKBKE,MAP2K1,MAP2K7,MAP3K3,MAP3K4,REL,TRAF2
CXCR4 Signaling	0.851	0.15	1.414	ADCY6,ADCY7,GNA14,GNAL,GNAO1,GNAT1,GNAZ,MAP2K1,MRAS,MYL1,MYL4,NRAS,PAK1,PIK3C3,PIK3CA,PIK3CB,PIK3CG,PRKCA,RAP2B,RASD1,RHOBTB2,RHOF,RHOH,RHOT2,RHOU
ERBB Signaling	0.851	0.161	2.138	HBEGF,MAP2K1,MRAS,NRAS,NRG2,PAK1,PIK3C3,PIK3CA,PIK3CB,PIK3CG,PLCG2,PRKCA,RAP2B,RASD1,SOS1
FGF Signaling	0.845	0.163	1.069	ATF2,CREB3,CREB3L3,FGF23,HGF,MAP2K1,MET,PIK3C3,PIK3CA,PIK3CB,PIK3CG,PRKCA,RPS6KA5,SOS1
Ferroptosis Signaling Pathway	0.845	0.154	0.894	ACSL4,ALOX12,ARF3,ARF6,BID,BRAF,DPP4,HMGCR,MAP2K1,MRAS,NRAS,PRKAA1,PRKAA2,PRKAG1,RAP2B,RASD1,SLC11A2,SLC39A14,SLC39A8,SREBF2
LXR/RXR Activation	0.833	0.154	-0.832	AHSG,APOD,APOE,CYP51A1,ECHS1,FASN,HMGCR,IL1R1,IL1RAP,LY96,LYZ,NR1H3,PTGS2,REL,RXRB,S100A8,SCD,TLR3,VTN
RHOA Signaling	0.833	0.154	0.471	ACTA1,ACTA2,ARHGAP6,CDC42EP1,CDC42EP2,CDC42EP3,CDC42EP4,CFL2,CIT,IGF1,LPAR4,MYL1,MYL4,PIKFYVE,PIP4K2A,PIP4K2B,PLD1,PLXNA1,RHPN2
Superpathway of Methionine Degradation	0.833	0.189	1.89	AHCYL2,CDO1,MAT2B,MMUT,PCCB,PRMT3,SUOX
G Protein Signaling Mediated by Tubby	0.827	0.182	#NUM!	GNA14,GNAL,GNAO1,GNAT1,GNAZ,LCK,MRAS,PLCG2
ERB2-ERBB3 Signaling	0.827	0.169	1.897	MAP2K1,MRAS,NRAS,NRG2,PIK3C3,PIK3CA,PIK3CB,PIK3CG,RAP2B,RASD1,SOS1
Chondroitin and Dermatan Biosynthesis	0.81	0.333	#NUM!	CHPF,CHSY1
UDP-N-acetyl-D-glucosamine Biosynthesis II	0.81	0.333	#NUM!	GFPT1,UAP1
Zymosterol Biosynthesis	0.81	0.333	#NUM!	CYP51A1,HSD17B7
ERK/MAPK Signaling	0.804	0.144	0.962	ATF2,BRAF,CREB3,CREB3L3,EIF4E,ITGA2B,ITGA3,ITGB3,ITGB5,MAP2K1,MAPKAPK5,MRAS,NRAS,PAK1,PIK3C3,PIK3CA,PIK3CB,PIK3CG,PLA2G5,PLCG2,PRKACA,PRKAG1,PRKAR1B,PRKCA,RAP2B,RAPGEF1,RASD1,RPS6KA5,SOS1,SRF,VRK2
Calcium Signaling	0.804	0.144	1.342	ACTA1,ACTA2,ATF2,CABIN1,CACNA1E,CAMK2B,CATSPER2,CHP1,CHRNE,CREB3,CREB3L3,EP300,GRIA2,GRIA3,GRIN2D,HDAC6,HDAC9,MYH11,MYH3,MYL1,MYL4,MYO10,MYO5C,NFATC2,NFATC4,PPP3CC,PRKACA,PRKAG1,PRKAR1B,RAP2B,SLC8A1
Granzyme A Signaling	0.793	0.222	#NUM!	EP300,H1-0,NME1,PRF1
Antigen Presentation Pathway	0.79	0.184	#NUM!	CD74,HLA-A,HLA-DMA,HLA-DQA1,HLA-DQB1,MR1,PSMB9
Leukocyte Extravasation Signaling	0.788	0.145	0.426	ACTA1,ACTA2,ARHGAP6,BMX,CLDN11,CLDN23,EDIL3,FER,ICAM1,ITGA3,JAM2,JAM3,MAP3K4,MMP15,MMP2,NCF2,PIK3C3,PIK3CA,PIK3CB,PIK3CG,PLCG2,PRKCA,RHOH,SELPLG,TEC,TIMP4,VAV3,WAS
Pancreatic Adenocarcinoma Signaling	0.788	0.152	1.667	BRCA2,CCNE2,CDKN2B,E2F1,E2F7,HBEGF,HDAC6,HDAC9,MAP2K1,NAPEPLD,PIK3C3,PIK3CA,PIK3CB,PIK3CG,PLD1,PTGS2,REL,SIN3A,TGFB2
NAD Phosphorylation and Dephosphorylation	0.78	0.25	#NUM!	ACP2,NADK,NADK2
Fc Epsilon RI Signaling	0.777	0.153	1.698	INPP5D,INPP5F,INPP5J,MAP2K1,MAP2K7,MRAS,NRAS,PIK3C3,PIK3CA,PIK3CB,PIK3CG,PLA2G5,PLCG2,PRKCA,RAP2B,RASD1,SOS1,VAV3
NRF2-mediated Oxidative Stress Response	0.777	0.142	0.535	ACTA1,ACTA2,CAT,CDC34,Cyp2d22,CYP2U1,DNAJA3,DNAJA4,DNAJC12,DNAJC4,DNAJC5,ENC1,EP300,FMO1,GCLM,GSR,GSTO1,GSTO2,GSTZ1,MAP2K1,MAP2K7,MAPK7,MRAS,NRAS,PIK3C3,PIK3CA,PIK3CB,PIK3CG,PMF1/PMF1-BGLAP,PRKCA,RAP2B,RASD1,SOD3
Cholecystokinin/Gastrin-mediated Signaling	0.777	0.153	2	ATF2,EPHA4,GAST,MAP2K1,MAPK7,MRAS,NRAS,PRKCA,PTGS2,RAP2B,RASD1,RHOBTB2,RHOF,RHOH,RHOT2,RHOU,SOS1,SRF
Insulin Secretion Signaling Pathway	0.772	0.14	0.845	ADCY6,ADCY7,ATF2,CACNA1E,CAMK2B,CHRM3,CREB3,CREB3L3,CRTC2,EIF2B1,EIF4E,EIF4EBP2,GNA14,GOSR1,GPAA1,KCNJ8,LCK,NAPB,NAPG,PIK3C3,PIK3CA,PIK3CB,PIK3CG,PLCD1,PLCG2,PLCL1,PLCL2,PRKACA,PRKAG1,PRKAR1B,PRKCA,RPS6KA5,SEC11C,SLC2A1,SRP54,SRP68,STX1A,STX1B
Synaptic Long Term Depression	0.77	0.144	1.46	CACNA1E,CATSPER2,GAST,GNA14,GNAL,GNAO1,GNAT1,GNAZ,GRIA2,GRIA3,IGF1,MAP2K1,MRAS,NPR3,NRAS,NT5C,PLA2G5,PLB1,PLCD1,PLCG2,PLCL1,PLCL2,PNPLA8,PRDX6,PRKCA,PRKG1,RAP2B,RASD1
ERK5 Signaling	0.77	0.162	1.508	ATF2,CREB3,CREB3L3,FOXO3,MAP3K3,MAPK7,MRAS,NRAS,RAP2B,RASD1,RPS6KA2,RPS6KA5
LPS/IL-1 Mediated Inhibition of RXR Function	0.767	0.141	0.832	ABCB1,ACSF2,ACSL3,ACSL4,ALAS1,ALDH18A1,ALDH3A2,ALDH5A1,ALDH7A1,ALDH9A1,APOE,CAT,CPT1C,Cyp2d22,CYP2U1,FABP4,FABP5,FMO1,FMO5,GSTO1,GSTO2,GSTZ1,HS6ST1,IL1R1,IL1RAP,IRAK1,LY96,MAP2K7,NCOA1,NDST2,NR1H3,PPARGC1B,SOD3,TRAF2,TRAF6
CDP-diacylglycerol Biosynthesis I	0.764	0.2	1.342	AGPAT2,LPCAT4,LPGAT1,MBOAT1,TAZ
NAD Salvage Pathway II	0.764	0.2	0.447	ACP2,NMNAT1,NT5C,NT5C2,NT5E
Semaphorin Signaling in Neurons	0.757	0.167	#NUM!	CFL2,MET,NRP1,PAK1,PLXNA1,RHOBTB2,RHOF,RHOH,RHOT2,RHOU
Role of NANOG in Mammalian Embryonic Stem Cell Pluripotency	0.754	0.151	1.667	BMP6,BMP8A,FZD9,GATA6,MAP2K1,MRAS,NRAS,PIK3C3,PIK3CA,PIK3CB,PIK3CG,RAP2B,RASD1,RIF1,SMO,SOS1,WNT2,WNT5B
Mouse Embryonic Stem Cell Pluripotency	0.754	0.154	1.291	DVL2,FZD9,ID2,ID4,MAP2K1,MRAS,NRAS,PIK3C3,PIK3CA,PIK3CB,PIK3CG,RAP2B,RASD1,SMO,SOS1,Tcf7
Role of OCT4 in Mammalian Embryonic Stem Cell Pluripotency	0.747	0.174	#NUM!	FOXA2,PHB,PHC1,PPP1R8,RXRB,TASOR,TDRD7,WWP2
WNT/β-catenin Signaling	0.735	0.145	0.447	ACVR1B,BCL9,BTRC,CDH1,CSNK1D,CSNK1G1,DKK3,DVL2,EP300,FZD9,GNAO1,LRP1,NLK,PPARD,RARB,RUVBL2,SFRP1,SMO,SOX5,Tcf7,TGFB2,TLE1,TLE4,WNT2,WNT5B
Purine Nucleotides Degradation II (Aerobic)	0.733	0.211	0	IMPDH1,NT5C,NT5C2,NT5E
Mitochondrial L-carnitine Shuttle Pathway	0.733	0.211	#NUM!	ACSF2,ACSL3,ACSL4,CPT1C
Fatty Acid α-oxidation	0.733	0.211	0	ALDH3A2,ALDH7A1,ALDH9A1,PTGS2
DNA damage-induced 14-3-3σ Signaling	0.733	0.211	#NUM!	ATR,CCNE2,RAD1,RAD17
Th2 Pathway	0.733	0.148	0.832	ACVR1B,APH1B,Aph1c,DLL1,HLA-A,HLA-DMA,HLA-DQA1,HLA-DQB1,ICAM1,IL4R,NCSTN,NFATC2,NOTCH2,NOTCH3,PIK3C3,PIK3CA,PIK3CB,PIK3CG,PSEN1,RUNX3
Corticotropin Releasing Hormone Signaling	0.717	0.146	-0.943	ADCY6,ADCY7,ATF2,BDNF,BRAF,CACNA1E,CATSPER2,CREB3,CREB3L3,GAST,GNAO1,MAP2K1,NPR3,NR4A1,NT5C,PLCG2,PRKACA,PRKAG1,PRKAR1B,PRKCA,PTGS2,SMO
Triacylglycerol Degradation	0.717	0.167	0	ABHD6,DAGLB,LIPE,LIPG,NDST2,PLA1A,PLB1,PNPLA7,PRDX6
IL-12 Signaling and Production in Macrophages	0.712	0.147	#NUM!	ALOX12,APOD,APOE,ELP1,EP300,IKBKE,IRF1,LYZ,MAP2K1,NCOA1,PIK3C3,PIK3CA,PIK3CB,PIK3CG,PRKCA,REL,S100A8,TGFB2,TLR2,TRAF6
Glycogen Degradation III	0.706	0.231	#NUM!	GAA,GDPGP1,PGM1
Cholesterol Biosynthesis I	0.706	0.231	#NUM!	CYP51A1,HSD17B7,SC5D
γ-glutamyl Cycle	0.706	0.231	#NUM!	ANPEP,GCLM,OPLAH
Cholesterol Biosynthesis II (via 24,25-dihydrolanosterol)	0.706	0.231	#NUM!	CYP51A1,HSD17B7,SC5D
Guanosine Nucleotides Degradation III	0.706	0.231	#NUM!	NT5C,NT5C2,NT5E
Cholesterol Biosynthesis III (via Desmosterol)	0.706	0.231	#NUM!	CYP51A1,HSD17B7,SC5D
Agrin Interactions at Neuromuscular Junction	0.703	0.159	1.414	ACTA1,ACTA2,ARHGEF6,LAMA2,LAMC1,MRAS,NRAS,NRG2,PAK1,RAP2B,RASD1
Neuroinflammation Signaling Pathway	0.701	0.137	-0.324	ACVR1B,APH1B,Aph1c,ATF2,BDNF,BIRC3,CHP1,CREB3,CREB3L3,ELP1,GRIN2D,HLA-A,HLA-DMA,HLA-DQA1,HLA-DQB1,ICAM1,IKBKE,IL1R1,IRAK1,KLK3,MAPK7,MR1,NAIP,Naip1 (includes others),NCF2,NCSTN,NFATC2,NFATC4,PIK3C3,PIK3CA,PIK3CB,PIK3CG,PLA2G5,PLCG2,PPP3CC,PSEN1,PTGS2,REL,S100G,TGFB2,TLR2,TLR3,TRAF6
Glycogen Biosynthesis II (from UDP-D-Glucose)	0.699	0.286	#NUM!	GBE1,GYG1
Glycoaminoglycan-protein Linkage Region Biosynthesis	0.699	0.286	#NUM!	B3GALT6,XYLT2
Sertoli Cell-Sertoli Cell Junction Signaling	0.697	0.141	#NUM!	ACTA1,ACTA2,ATF2,CDH1,CLDN11,CLDN23,ITGA2B,ITGA3,ITGB3,ITGB5,JAM2,JAM3,MAGI2,MAP2K1,MAP2K7,MAP3K3,MAP3K4,MRAS,NECTIN3,NRAS,PRKACA,PRKAG1,PRKAR1B,PRKG1,RAP2B,RASD1,TUBA1C,TUBB2B,WAS
PEDF Signaling	0.697	0.155	0.905	BDNF,CASP7,IKBKE,MRAS,NRAS,PIK3C3,PIK3CA,PIK3CB,PIK3CG,RAP2B,RASD1,REL,SRF
GNRH Signaling	0.688	0.141	1.46	ADCY6,ADCY7,ATF2,CACNA1E,CAMK2B,CATSPER2,CREB3,CREB3L3,GNA14,HBEGF,MAP2K1,MAP2K7,MAP3K3,MAP3K4,MAPK7,MMP2,MRAS,NRAS,PAK1,PRKACA,PRKAG1,PRKAR1B,PRKCA,RAP2B,RASD1,REL,SOS1
EGF Signaling	0.684	0.164	1.667	MAP2K1,MAP2K7,PIK3C3,PIK3CA,PIK3CB,PIK3CG,PRKCA,SOS1,SRF
PI3K/AKT Signaling	0.684	0.141	1.5	EIF4E,ELP1,FOXO3,IKBKE,IL15RA,IL17RD,IL1R1,IL3RA,IL4R,INPP5D,INPP5F,INPP5J,ITGA2B,ITGA3,ITGB3,ITGB5,MAP2K1,MRAS,NRAS,PIK3CA,PIK3CB,PIK3CG,PTGS2,RAP2B,RASD1,REL,SOS1,TSC1
Glutaryl-CoA Degradation	0.676	0.2	#NUM!	ACAA2,CDYL,HACD2,L3HYPDH
Triacylglycerol Biosynthesis	0.676	0.167	2.121	AGPAT2,DGAT1,LPCAT4,LPGAT1,LPIN2,MBOAT1,PLPP5,TAZ
White Adipose Tissue Browning Pathway	0.674	0.145	0.229	ADCY6,ADCY7,ATF2,BDNF,CACNA1E,CATSPER2,CREB3,CREB3L3,FNDC5,FOXC2,LIPE,NDN,PRKAA1,PRKAA2,PRKACA,PRKAG1,PRKAR1B,PRKG1,RARB,RXRB
FcγRIIB Signaling in B Lymphocytes	0.672	0.153	1.897	CACNA1E,CATSPER2,INPP5D,MRAS,NRAS,PIK3C3,PIK3CA,PIK3CB,PIK3CG,PLCG2,RAP2B,RASD1,SOS1
Xenobiotic Metabolism AHR Signaling Pathway	0.672	0.153	1.155	ALDH18A1,ALDH3A2,ALDH5A1,ALDH7A1,ALDH9A1,ANKRA2,EP300,GSTO1,GSTO2,GSTZ1,NCOA1,NCOA2,REL
Regulation Of The Epithelial Mesenchymal Transition By Growth Factors Pathway	0.672	0.141	1	BRAF,CDH1,FGF23,FOXC2,HGF,ID2,IKBKE,LTB,MAP2K1,MAP2K7,MEST,MET,MMP2,MRAS,NRAS,PARD6A,PDGFB,PIK3C3,PIK3CA,PIK3CB,PIK3CG,RAP2B,RASD1,REL,SOS1,TGFB2,ZEB2
4-1BB Signaling in T Lymphocytes	0.666	0.176	0.447	ATF2,ELP1,IKBKE,MAP2K1,REL,TRAF2
Glutathione Redox Reactions I	0.666	0.185	1	GPX7,GSR,GSTZ1,PRDX6,PTGES
Phosphatidylglycerol Biosynthesis II (Non-plastidic)	0.666	0.185	1.342	AGPAT2,LPCAT4,LPGAT1,MBOAT1,TAZ
Stearate Biosynthesis I (Animals)	0.664	0.159	1.134	ACOT2,ACOT8,ACSF2,ACSL3,ACSL4,AKR1B10,FASN,LPCAT4,LPGAT1,PRXL2B
Asparagine Degradation I	0.648	0.5	#NUM!	ASRGL1
β-alanine Degradation I	0.648	0.5	#NUM!	ABAT
Lipoate Biosynthesis and Incorporation II	0.648	0.5	#NUM!	LIAS
Choline Degradation I	0.648	0.5	#NUM!	ALDH7A1
Taurine Biosynthesis	0.648	0.5	#NUM!	CDO1
Flavin Biosynthesis IV (Mammalian)	0.648	0.5	#NUM!	RFK
Sulfate Activation for Sulfonation	0.648	0.5	#NUM!	PAPSS1
L-glutamine Biosynthesis II (tRNA-dependent)	0.648	0.5	#NUM!	GATB
GDP-L-fucose Biosynthesis I (from GDP-D-mannose)	0.648	0.5	#NUM!	GMDS
p70S6K Signaling	0.64	0.144	0.943	EEF2K,IL4R,MAP2K1,MRAS,NRAS,PIK3C3,PIK3CA,PIK3CB,PIK3CG,PLCD1,PLCG2,PLCL1,PLCL2,PLD1,PRKCA,RAP2B,RASD1,RPS6,SOS1
Aldosterone Signaling in Epithelial Cells	0.638	0.141	2	CRYAB,Dnajb3,DNAJC12,DNAJC25,DNAJC4,DNAJC5,ICMT,MAP2K1,PIK3C3,PIK3CA,PIK3CB,PIK3CG,PIKFYVE,PIP4K2A,PIP4K2B,PLCD1,PLCG2,PLCL1,PLCL2,PRKCA,SLC12A2,SMO,SOS1
DNA Double-Strand Break Repair by Homologous Recombination	0.638	0.214	#NUM!	BRCA2,LIG1,MRE11
DNA Double-Strand Break Repair by Non-Homologous End Joining	0.638	0.214	#NUM!	MRE11,XRCC4,XRCC6
Role of IL-17A in Psoriasis	0.638	0.214	#NUM!	CXCL3,S100A8,S100A9
Mevalonate Pathway I	0.638	0.214	#NUM!	ACAA2,HMGCR,MVD
Colanic Acid Building Blocks Biosynthesis	0.638	0.214	#NUM!	GALK2,GMDS,GMPPB
mTOR Signaling	0.635	0.138	1.633	AKT1S1,EIF3B,EIF3I,EIF4E,EIF4EBP2,MRAS,NAPEPLD,NRAS,PIK3C3,PIK3CA,PIK3CB,PIK3CG,PLD1,PRKAA1,PRKAA2,PRKAG1,PRKCA,RAP2B,RASD1,RHOBTB2,RHOF,RHOH,RHOT2,RHOU,RPS6,RPS6KA2,RPS6KA5,RPTOR,TSC1
Role of IL-17A in Arthritis	0.623	0.158	#NUM!	ATF2,CXCL3,MAP2K1,PIK3C3,PIK3CA,PIK3CB,PIK3CG,PTGS2,REL
Valine Degradation I	0.623	0.19	#NUM!	ABAT,ECHDC3,ECHS1,HIBCH
Endoplasmic Reticulum Stress Pathway	0.623	0.19	-1	CASP7,ERN1,TAOK3,TRAF2
Netrin Signaling	0.622	0.153	-0.632	ABLIM1,CACNA1E,CATSPER2,CHP1,NFATC2,NFATC4,PPP3CC,PRKACA,PRKAG1,PRKAR1B,PRKG1
PXR/RXR Activation	0.609	0.154	-0.632	ABCB1,ALAS1,ALDH3A2,FOXA2,NCOA1,PCK2,PRKACA,PRKAG1,PRKAR1B,SCD
Phosphatidylethanolamine Biosynthesis II	0.607	0.25	#NUM!	CHKA,ETNK2
3-phosphoinositide Biosynthesis	0.607	0.137	1.225	CDC25A,DUSP10,DUSP12,DUSP16,FIG4,HACD2,INPP5D,INPP5F,IPMK,NOCT,NT5C,NUDT11,PDCD1,PI4K2A,PI4K2B,PIK3C3,PIK3CA,PIK3CB,PIK3CG,PIKFYVE,PIP4K2A,PIP4K2B,PPM1K,PPP1R8,PPP3CC,PTPN2,PTPRF,STYX
NER (Nucleotide Excision Repair, Enhanced Pathway)	0.607	0.146	1.387	CCNH,CHAF1A,COPS5,COPS7B,DDB2,EP300,ERCC3,ERCC6,GTF2H2,GTF2H4,LIG1,POLA2,POLK,PRIM1,SLC19A1
Antioxidant Action of Vitamin C	0.6	0.144	-2.53	GSTO1,GSTO2,IKBKE,NAPEPLD,PLA2G5,PLB1,PLCD1,PLCG2,PLCL1,PLCL2,PLD1,PNPLA8,PRDX6,REL,SLC2A1,TXNRD3
Xenobiotic Metabolism General Signaling Pathway	0.599	0.141	2.236	ABCA2,EP300,GSTO1,GSTO2,GSTZ1,MAP2K1,MAP2K7,MAP3K3,MAP3K4,MAPK7,MRAS,NR1H3,NRAS,PIK3C3,PIK3CA,PIK3CB,PIK3CG,PRKCA,RAP2B,RASD1
Natural Killer Cell Signaling	0.595	0.137	3.138	CD226,CFL2,COL3A1,HLA-A,IL15,LCK,MAP2K1,MAP3K3,MAP3K4,MRAS,NFATC2,NFATC4,NRAS,PAK1,PIK3C3,PIK3CA,PIK3CB,PIK3CG,PLCG2,RAP2B,RASD1,REL,SOS1,TRAF6,ULBP1,VAV3,WAS
Glutathione-mediated Detoxification	0.59	0.167	1.342	ANPEP,GSTO1,GSTO2,GSTZ1,HPGDS,PTGES
Interferon Signaling	0.59	0.167	0	BAK1,IFIT1,IRF1,PIAS1,PTPN2,SOCS1
GP6 Signaling Pathway	0.59	0.142	1.5	COL15A1,COL3A1,COL4A5,COL6A2,COL6A3,FYB1,ITGA2B,ITGB3,LAMA2,LAMA5,LAMC1,PIK3C3,PIK3CA,PIK3CB,PIK3CG,PLCG2,PRKCA,VAV3
Production of Nitric Oxide and Reactive Oxygen Species in Macrophages	0.582	0.137	1.46	APOD,APOE,CAT,ELP1,IKBKE,IRF1,LYZ,MAP2K1,MAP2K7,MAP3K3,MAP3K4,NCF2,PIK3C3,PIK3CA,PIK3CB,PIK3CG,PLCG2,PRKCA,REL,RHOBTB2,RHOF,RHOH,RHOT2,RHOU,S100A8,TLR2
Fatty Acid Activation	0.578	0.2	#NUM!	ACSF2,ACSL3,ACSL4
Superpathway of Citrulline Metabolism	0.578	0.2	#NUM!	ALDH18A1,ASS1,LOC102724788/PRODH
IL-15 Production	0.575	0.142	1.5	BMX,DDR1,EPHA2,EPHA4,EPHB1,FER,FLT1,IL15,IRF1,KIT,LCK,MAP2K1,MAP2K7,MET,REL,TEC,TWF1
p38 MAPK Signaling	0.575	0.142	0.5	ATF2,CREB3,CREB3L3,DUSP10,EEF2K,IL1R1,IL1RAP,IRAK1,MAPKAPK5,PLA2G5,RPS6KA2,RPS6KA5,SRF,TGFB2,TIFA,TRAF2,TRAF6
Pulmonary Fibrosis Idiopathic Signaling Pathway	0.569	0.132	1.718	ACTA1,ACTA2,ACVR1B,AJUBA,ATF2,BRAF,CCN4,CDH1,COL15A1,COL3A1,COL4A5,COL6A2,COL6A3,EIF4EBP2,EP300,EZH1,FOXO3,FZD9,MAP2K1,MMP15,MMP2,MRAS,NOTCH2,NOTCH3,NRAS,PDGFB,PIK3C3,PIK3CA,PIK3CB,PIK3CG,RAP2B,RASD1,REL,RPS6KA2,RPS6KA5,SERPINE1,SMO,SOS1,SRF,Tcf7,TGFB2,WNT2,WNT5B
Pulmonary Healing Signaling Pathway	0.565	0.136	2.117	BRAF,CDH1,CFL2,EP300,ETV5,FZD9,HBEGF,LCK,MMP15,MMP2,MRAS,NOTCH2,NOTCH3,NRAS,PRKAA1,PRKAA2,PRKAG1,PRKCA,RAP2B,RASD1,SMO,SOS1,Tcf7,TGFB2,TLR2,WNT2,WNT5B
Ceramide Signaling	0.558	0.144	0	MAP2K1,MRAS,NRAS,NSMAF,PIK3C3,PIK3CA,PIK3CB,PIK3CG,RAP2B,RASD1,REL,SMPD2,SMPD4
SPINK1 General Cancer Pathway	0.558	0.149	1	MAP2K1,MRAS,Mt1,NRAS,PIK3C3,PIK3CA,PIK3CB,PIK3CG,RAP2B,RASD1
UVB-Induced MAPK Signaling	0.553	0.154	1.414	EIF4E,MAP2K1,PIK3C3,PIK3CA,PIK3CB,PIK3CG,PRKCA,RPS6KA5
ID1 Signaling Pathway	0.551	0.135	1.347	ABI1,ACVR1B,AURKA,BCL3,BRAF,CHRNE,DVL2,E2F1,EP300,FOXO3,IGF2,KIF11,LCK,MCAM,MMP2,MRAS,NRAS,PIK3C3,PIK3CA,PIK3CB,PIK3CG,PLAC8,PLXNB2,RAP2B,RASD1,S100A9,TGFB2
Caveolar-mediated Endocytosis Signaling	0.548	0.147	#NUM!	ACTA1,ACTA2,HLA-A,ITGA2B,ITGA3,ITGB3,ITGB5,ITSN1,MR1,PRKCA,RAB5B
GPCR-Mediated Integration of Enteroendocrine Signaling Exemplified by an L Cell	0.548	0.147	-2.111	ADCY6,ADCY7,ADRB1,GNA14,PLCD1,PLCG2,PLCL1,PLCL2,PRKACA,PRKAG1,PRKAR1B
Telomerase Signaling	0.547	0.142	1.667	E2F1,HDAC6,HDAC9,MAP2K1,MRAS,NRAS,PIK3C3,PIK3CA,PIK3CB,PIK3CG,POT1,RAP2B,RASD1,SOS1,TERF1
GADD45 Signaling	0.542	0.15	0.333	ACVR1B,ATR,CCNE2,FOXO3,MAP2K7,MAP3K4,POU2F1,REL,TGFB2
Retinol Biosynthesis	0.539	0.156	2	AKR1B10,DAGLB,LIPE,LIPG,PLB1,RBP2,RDH13
Crosstalk between Dendritic Cells and Natural Killer Cells	0.536	0.143	0.333	ACTA1,ACTA2,CAMK2B,CD226,HLA-A,IL15,IL15RA,IL3RA,LTB,LTBR,PRF1,REL,TLR3
Citrulline Biosynthesis	0.532	0.222	#NUM!	ALDH18A1,LOC102724788/PRODH
GDP-glucose Biosynthesis	0.532	0.222	#NUM!	HK2,PGM1
Vitamin-C Transport	0.532	0.174	1	GSTO1,GSTO2,SLC2A1,TXNRD3
HOTAIR Regulatory Pathway	0.529	0.136	0.447	CDH1,COL3A1,DZIP3,EP300,ICAM1,IRF1,JAM2,MET,MEX3B,MMP15,MMP2,PCDHB5,PIK3C3,PIK3CA,PIK3CB,PIK3CG,REL,SNUPN,SRF,Tcf7,WNT2,WNT5B
Th1 and Th2 Activation Pathway	0.527	0.135	#NUM!	ACVR1B,APH1B,Aph1c,DLL1,HLA-A,HLA-DMA,HLA-DQA1,HLA-DQB1,ICAM1,IL4R,IRF1,NCSTN,NFATC2,NFATC4,NOTCH2,NOTCH3,PIK3C3,PIK3CA,PIK3CB,PIK3CG,PSEN1,RUNX3,SOCS1
Mismatch Repair in Eukaryotes	0.526	0.188	#NUM!	MLH1,MSH3,SLC19A1
Adenosine Nucleotides Degradation II	0.526	0.188	#NUM!	NT5C,NT5C2,NT5E
Docosahexaenoic Acid (DHA) Signaling	0.523	0.158	#NUM!	BID,BIK,PIK3C3,PIK3CA,PIK3CB,PIK3CG
Necroptosis Signaling Pathway	0.514	0.135	0.655	BIRC3,CAMK2B,CAPN1,CAPN7,CHP1,EIF2AK2,MLKL,PAM16,PLA2G5,PPID,PPIF,PPP3CC,SHARPIN,TIMM17B,TIMM23,TIMM9,TLR3,TOMM40L,TOMM7,TRAF2,TSPO
Actin Cytoskeleton Signaling	0.51	0.132	1.877	ACTA1,ACTA2,ARHGEF6,CFL2,FGD1,FGF23,GSN,ITGA2B,ITGA3,ITGB3,ITGB5,MAP2K1,MRAS,MYH11,MYH3,MYL1,MYL4,MYO10,MYO5C,NCKAP1,NRAS,PAK1,PDGFB,PIK3C3,PIK3CA,PIK3CB,PIK3CG,RAP2B,RASD1,SOS1,VAV3,WAS
Role of RIG1-like Receptors in Antiviral Innate Immunity	0.51	0.152	0.447	EP300,IFIH1,IKBKE,MAVS,REL,TRAF2,TRAF6
Gαi Signaling	0.502	0.136	1.387	ADCY6,ADCY7,APLNR,GNA14,GNAL,GNAO1,GNAT1,GNAZ,MRAS,NPR3,NRAS,PRKACA,PRKAG1,PRKAR1B,RAP2B,RASD1,RGS12,SOS1,TBXA2R
Dilated Cardiomyopathy Signaling Pathway	0.5	0.135	-0.5	ACTA1,ACTA2,ADCY6,ADCY7,ADRB1,CACNA1E,CAMK2B,CATSPER2,MAP3K3,MYH11,MYH3,MYL1,MYL4,MYO10,MYO5C,PDE3A,PRKACA,PRKAG1,PRKAR1B,SGCD
L-carnitine Biosynthesis	0.498	0.333	#NUM!	ALDH9A1
Diphthamide Biosynthesis	0.498	0.333	#NUM!	DPH6
NADH Repair	0.498	0.333	#NUM!	NAXE
Proline Degradation	0.498	0.333	#NUM!	LOC102724788/PRODH
1,25-dihydroxyvitamin D3 Biosynthesis	0.498	0.333	#NUM!	POR
Glutathione Biosynthesis	0.498	0.333	#NUM!	GCLM
Inosine-5'-phosphate Biosynthesis II	0.498	0.333	#NUM!	ATIC
Anandamide Degradation	0.498	0.333	#NUM!	NAAA
Biotin-carboxyl Carrier Protein Assembly	0.498	0.333	#NUM!	HLCS
Thiosulfate Disproportionation III (Rhodanese)	0.498	0.333	#NUM!	TST
S-adenosyl-L-methionine Biosynthesis	0.498	0.333	#NUM!	MAT2B
Pyroptosis Signaling Pathway	0.496	0.14	1.941	FOXO3,GBP3,GBP5,GSDMD,GSDME,IL1R1,KCNQ1OT1,NAIP,PRKACA,PRKAG1,PRKAR1B,TLR2,TLR3
CCR3 Signaling in Eosinophils	0.487	0.135	1.508	CFL2,GNA14,GNAL,GNAO1,GNAT1,GNAZ,MAP2K1,MRAS,NRAS,PAK1,PIK3C3,PIK3CA,PIK3CB,PIK3CG,PLA2G5,PRKCA,RAP2B,RASD1
Role of WNT/GSK-3β Signaling in the Pathogenesis of Influenza	0.483	0.141	0	CSNK1D,CSNK1G1,DVL2,FZD9,NCOA1,NCOA2,SIAH1,SMO,Tcf7,WNT2,WNT5B
nNOS Signaling in Neurons	0.483	0.149	1	CAPN1,CAPN7,CHP1,GRIN2D,PPP3CC,PRKCA,RASD1
Fcγ Receptor-mediated Phagocytosis in Macrophages and Monocytes	0.478	0.138	0.832	ACTA1,ACTA2,ARF6,CBL,FYB1,INPP5D,NAPEPLD,PAK1,PIK3CG,PLD1,PRKCA,VAV3,WAS
RAN Signaling	0.478	0.176	#NUM!	CSE1L,KPNA3,RANGAP1
Nitric Oxide Signaling in the Cardiovascular System	0.472	0.136	-1.5	ADRB1,CACNA1E,FLT1,MAP2K1,PDE3B,PDE5A,PIK3C3,PIK3CA,PIK3CB,PIK3CG,PRKAA1,PRKACA,PRKAG1,PRKAR1B,PRKCA,PRKG1
Glucose and Glucose-1-phosphate Degradation	0.469	0.2	#NUM!	HK2,PGM1
Glycine Betaine Degradation	0.469	0.2	#NUM!	SHMT1,SHMT2
Tryptophan Degradation X (Mammalian, via Tryptamine)	0.455	0.16	#NUM!	AKR1B10,ALDH3A2,ALDH7A1,ALDH9A1
Mechanisms of Viral Exit from Host Cells	0.437	0.146	#NUM!	ACTA1,ACTA2,CHMP6,LMNB2,PRKCA,VPS25
Isoleucine Degradation I	0.435	0.167	#NUM!	ACAA2,ECHDC3,ECHS1
Spliceosomal Cycle	0.432	0.143	-1.134	DHX16,MAGOHB,RBMX2,RNF113A,SF3A1,SLU7,SNIP1
Estrogen-mediated S-phase Entry	0.421	0.154	1	CCNE2,CDC25A,E2F1,E2F7
Role of JAK2 in Hormone-like Cytokine Signaling	0.415	0.147	#NUM!	SOCS1,SOCS2,SOCS5,SOCS6,SOCS7
Glycogen Degradation II	0.413	0.182	#NUM!	GDPGP1,PGM1
Purine Nucleotides De Novo Biosynthesis II	0.413	0.182	#NUM!	ATIC,IMPDH1
MYC Mediated Apoptosis Signaling	0.408	0.14	-1.134	ADRB1,BID,IKBKE,PRKACA,PRKAG1,PRKAR1B,TRAF2
Unfolded protein response	0.408	0.133	1.342	AMFR,DNAJA3,DNAJA4,DNAJC12,DNAJC4,DNAJC5,ERN1,INSIG1,MAP2K7,SCAP,SREBF2,TRAF2
Mitotic Roles of Polo-Like Kinase	0.407	0.136	0.707	ANAPC1,ANAPC13,ANAPC2,CAPN1,CDC16,CDC25A,KIF11,KIF23,WEE1
Role of PI3K/AKT Signaling in the Pathogenesis of Influenza	0.407	0.136	1.342	KPNA3,MAP2K1,MLH1,PIK3C3,PIK3CA,PIK3CB,PIK3CG,PLAC8,REL
Retinoate Biosynthesis II	0.399	0.25	#NUM!	RBP2
Heme Degradation	0.399	0.25	#NUM!	HMOX2
Heme Biosynthesis from Uroporphyrinogen-III I	0.399	0.25	#NUM!	PPOX
Oxidized GTP and dGTP Detoxification	0.399	0.25	#NUM!	RUVBL2
L-cysteine Degradation I	0.399	0.25	#NUM!	CDO1
Histamine Degradation	0.396	0.158	#NUM!	ALDH3A2,ALDH7A1,ALDH9A1
Tryptophan Degradation III (Eukaryotic)	0.389	0.148	#NUM!	ACAA2,CDYL,HACD2,L3HYPDH
Oxytocin In Spinal Neurons Signaling Pathway	0.387	0.143	-1.342	GAST,KCNJ8,NPR3,NT5C,PRKG1
IL-17A Signaling in Airway Cells	0.387	0.134	1.414	CXCL3,IKBKE,MAP2K1,PIK3C3,PIK3CA,PIK3CB,PIK3CG,REL,TRAF6
Nucleotide Excision Repair Pathway	0.387	0.143	#NUM!	CCNH,ERCC3,ERCC6,GTF2H2,GTF2H4
Dermatan Sulfate Biosynthesis	0.386	0.136	1.414	B3GALT6,CHPF,CHST14,CHSY1,DSE,HS6ST1,NDST2,XYLT2
Human Embryonic Stem Cell Pluripotency	0.38	0.127	#NUM!	BDNF,BMP6,BMP8A,FZD9,GNA14,GNAL,GNAO1,GNAT1,GNAZ,KLK3,MRAS,PDGFB,PIK3C3,PIK3CA,PIK3CB,PIK3CG,SMO,Tcf7,TGFB2,WNT2,WNT5B
Huntington's Disease Signaling	0.378	0.125	0.471	ATF2,BDNF,CAPN1,CAPN7,CASP7,CREB3,CREB3L3,DNAJC5,DNM3,EP300,GNA14,GOSR1,GPAA1,HAP1,HDAC6,HDAC9,HTT,IGF1,MAP2K7,NAPB,NAPG,PIK3C3,PIK3CA,PIK3CB,PIK3CG,PRKCA,PSMB9,PSMC6,PSMD2,PSME3,SIN3A,SOS1,STX1A,STX1B,TBP
Hepatic Cholestasis	0.375	0.126	#NUM!	ABCB1,ADCY6,ADCY7,CLCF1,CYP27A1,Eda,ELP1,IKBKE,IL15,IL1R1,IL1RAP,IRAK1,LTB,LY96,MAP3K4,NR1H3,PRKACA,PRKAG1,PRKAR1B,PRKCA,REL,TGFB2,TRAF2,TRAF6
3-phosphoinositide Degradation	0.375	0.126	1.706	CDC25A,DUSP10,DUSP12,DUSP16,FIG4,HACD2,INPP4A,INPP4B,INPP5D,INPP5E,INPP5F,INPP5J,MTMR14,NOCT,NT5C,NUDT11,PDCD1,PIKFYVE,PPM1K,PPP1R8,PPP3CC,PTPN2,PTPRF,STYX
Hypoxia Signaling in the Cardiovascular System	0.371	0.132	0.447	ATF2,CDC34,COPS5,CREB3,CREB3L3,CSNK1D,EP300,UBE2E2,UBE2M,UBE2Q2
Role of MAPK Signaling in Inhibiting the Pathogenesis of Influenza	0.371	0.132	1.667	ATF2,BRAF,EIF2AK2,MAP2K1,MAP2K7,PLA2G5,PLB1,PNPLA8,PRDX6,PTGS2
Retinoic acid Mediated Apoptosis Signaling	0.367	0.133	1.89	BID,IRF1,PARP2,PARP4,PARP9,RARB,RXRB,TNKS
Hematopoiesis from Multipotent Stem Cells	0.367	0.167	#NUM!	IL15,KITLG
UDP-N-acetyl-D-galactosamine Biosynthesis II	0.367	0.167	#NUM!	HK2,UAP1
Estrogen Biosynthesis	0.364	0.136	2.236	AKR1B10,CYP2U1,CYP51A1,HSD17B11,HSD17B7,POR
MIF-mediated Glucocorticoid Regulation	0.362	0.139	1	CD74,LY96,PLA2G5,PTGS2,REL
Putrescine Degradation III	0.362	0.15	#NUM!	ALDH3A2,ALDH7A1,ALDH9A1
Factors Promoting Cardiogenesis in Vertebrates	0.352	0.126	0.471	ACVR1B,ATF2,BMP6,BMP8A,CAMK2B,CREB3,CREB3L3,FZD9,LRP1,PLCD1,PLCG2,PLCL1,PLCL2,PRKCA,SMO,Tcf7,TGFB2,WNT2,WNT5B
Wound Healing Signaling Pathway	0.342	0.124	0.898	ACTA2,ACVR1B,CLCF1,COL15A1,COL3A1,COL4A5,COL6A2,COL6A3,Eda,HBEGF,IL15,IL1R1,IL1RAP,ITGA3,LAMA2,LAMA5,LAMC1,LTB,MAP2K1,MAP2K7,MRAS,NRAS,PDGFB,PF4,PRKCA,RAP2B,RASD1,SOS1,TGFB2,TRAF2,TRAF6
Cell Cycle Regulation by BTG Family Proteins	0.338	0.135	#NUM!	CCNE2,CNOT7,E2F1,E2F7,NOCT
Osteoarthritis Pathway	0.337	0.123	1.091	ATF2,CASP7,CCN4,CREB3,CREB3L3,DCN,FOXO3,FZD9,IL1R1,IL1RAP,ITGA2B,ITGA3,ITGB3,ITGB5,LRP1,PPARD,PRKAA1,PRKAA2,PRKAG1,PTGS2,PTHLH,REL,RUNX2,S100A8,S100A9,SLC39A8,SMO,Tcf7,TLR2
Role of PKR in Interferon Induction and Antiviral Response	0.334	0.125	0.535	ATF2,BID,CYC1,E2F1,EIF2AK2,ELP1,FANCC,IFIH1,IKBKE,IRF1,MAP2K7,MAVS,PDGFB,PRKRA,REL,TLR3,TRAF6
Arsenate Detoxification I (Glutaredoxin)	0.327	0.2	#NUM!	GSTO1
Proline Biosynthesis II (from Arginine)	0.327	0.2	#NUM!	PYCR2
Tetrahydrofolate Salvage from 5,10-methenyltetrahydrofolate	0.327	0.2	#NUM!	MTHFD2L
Serine Biosynthesis	0.327	0.2	#NUM!	UBAC2
CMP-N-acetylneuraminate Biosynthesis I (Eukaryotes)	0.327	0.2	#NUM!	NANS
Myo-inositol Biosynthesis	0.327	0.2	#NUM!	INPP5F
Trans, trans-farnesyl Diphosphate Biosynthesis	0.327	0.2	#NUM!	GGPS1
Citrulline-Nitric Oxide Cycle	0.327	0.2	#NUM!	ASS1
NAD Biosynthesis III	0.327	0.2	#NUM!	NMNAT1
Galactose Degradation I (Leloir Pathway)	0.327	0.2	#NUM!	GALK2
Tyrosine Degradation I	0.327	0.2	#NUM!	GSTZ1
Iron homeostasis signaling pathway	0.322	0.124	#NUM!	ABCB10,ACO2,ATP6V0A1,ATP6V0E2,BMP6,BMP8A,BTRC,CDC34,CREB3L3,HBB,HMOX2,LRP1,PDGFB,SLC11A2,SLC25A37,SLC39A14,TCIRG1
IL-23 Signaling Pathway	0.321	0.13	1.342	PIK3C3,PIK3CA,PIK3CB,PIK3CG,REL,RUNX1
Inhibition of Matrix Metalloproteases	0.315	0.132	0	ADAM17,LRP1,MMP15,MMP2,TIMP4
EIF2 Signaling	0.314	0.122	1.789	ACTA1,ACTA2,ATF5,EIF1AX,EIF2AK1,EIF2AK2,EIF2B1,EIF3B,EIF3I,EIF4E,MAP2K1,MRAS,NRAS,PIK3C3,PIK3CA,PIK3CB,PIK3CG,RAP2B,RASD1,RPL12,RPL13A,Rpl39l,RPL5,RPL7L1,RPS6,SOS1,WARS1
Role of Pattern Recognition Receptors in Recognition of Bacteria and Viruses	0.308	0.123	1.155	CLCF1,Eda,EIF2AK2,IFIH1,IL15,LTB,MAVS,PIK3C3,PIK3CA,PIK3CB,PIK3CG,PLCG2,PRKCA,PTX3,REL,TGFB2,TLR2,TLR3,TRAF6
Basal Cell Carcinoma Signaling	0.303	0.125	0.816	BMP6,BMP8A,DVL2,FZD9,HHIP,SMO,Tcf7,WNT2,WNT5B
iNOS Signaling	0.302	0.128	1	IKBKE,IRAK1,IRF1,LY96,REL,TRAF6
The Visual Cycle	0.301	0.136	#NUM!	AKR1B10,RBP2,RDH13
Methionine Degradation I (to Homocysteine)	0.301	0.136	#NUM!	AHCYL2,MAT2B,PRMT3
Regulation of Cellular Mechanics by Calpain Protease	0.298	0.124	-0.816	CAPN1,CAPN7,CCNE2,ITGA2B,ITGA3,ITGB3,ITGB5,MRAS,NRAS,RAP2B,RASD1
Acyl-CoA Hydrolysis	0.29	0.143	#NUM!	ACOT2,ACOT8
Bladder Cancer Signaling	0.287	0.122	1.633	CDH1,E2F1,FGF23,HDAC6,HDAC9,MAP2K1,MMP15,MMP2,MRAS,NRAS,RAP2B,RASD1,RPS6KA5,SIN3A
Activation of IRF by Cytosolic Pattern Recognition Receptors	0.281	0.123	0.378	ATF2,ELP1,IFIH1,IFIT2,IKBKE,MAVS,REL,TRAF6
Heparan Sulfate Biosynthesis	0.28	0.122	0.632	B3GALT6,EXTL2,EXTL3,HS6ST1,LIPE,NDST2,PLA1A,PNPLA7,PRDX6,XYLT2
eNOS Signaling	0.277	0.12	-0.5	ADCY6,ADCY7,CHRM3,CHRNE,FLT1,LPAR4,NOSTRIN,PIK3C3,PIK3CA,PIK3CB,PIK3CG,PLCG2,PRKAA1,PRKAA2,PRKACA,PRKAG1,PRKAR1B,PRKCA,PRKG1
IL-13 Signaling Pathway	0.277	0.121	0.535	ANO1,CHI3L1,FOSL2,FOXA2,HBEGF,IL4R,LCK,PIK3C3,PIK3CA,PIK3CB,PIK3CG,SOCS1,TGFB2,TRAF6
Acetone Degradation I (to Methylglyoxal)	0.275	0.125	1	AKR1B10,CYP2U1,CYP51A1,POR,PRXL2B
GABA Receptor Signaling	0.275	0.12	#NUM!	ABAT,ADCY6,ADCY7,ALDH5A1,ALDH9A1,AP1B1,AP2A1,CACNA1E,CATSPER2,GNA14,GNAL,GNAO1,GNAT1,GNAZ,KCNN4,MRAS
NAD Biosynthesis from 2-amino-3-carboxymuconate Semialdehyde	0.272	0.167	#NUM!	NMNAT1
Arginine Biosynthesis IV	0.272	0.167	#NUM!	ASS1
Trehalose Degradation II (Trehalase)	0.272	0.167	#NUM!	HK2
Urea Cycle	0.272	0.167	#NUM!	ASS1
Arginine Degradation VI (Arginase 2 Pathway)	0.272	0.167	#NUM!	PYCR2
Pentose Phosphate Pathway (Non-oxidative Branch)	0.272	0.167	#NUM!	TKT
Glycerol Degradation I	0.272	0.167	#NUM!	Gk
NAD Salvage Pathway III	0.272	0.167	#NUM!	NMNAT1
GDP-mannose Biosynthesis	0.272	0.167	#NUM!	GMPPB
Polyamine Regulation in Colon Cancer	0.259	0.121	0.378	AKT1S1,BRAF,MAP2K1,MAP2K7,MTA1,MXD1,RPTOR
Choline Biosynthesis III	0.259	0.133	#NUM!	NAPEPLD,PLD1
Cysteine Biosynthesis III (mammalia)	0.251	0.125	#NUM!	AHCYL2,MAT2B,PRMT3
Chondroitin Sulfate Degradation (Metazoa)	0.231	0.125	#NUM!	CEMIP2,HYAL1
Bupropion Degradation	0.23	0.12	#NUM!	CYP2U1,CYP51A1,POR
Thioredoxin Pathway	0.229	0.143	#NUM!	TXNRD3
Phosphatidylcholine Biosynthesis I	0.229	0.143	#NUM!	CHKA
Ceramide Degradation	0.229	0.143	#NUM!	NAAA
Histidine Degradation III	0.194	0.125	#NUM!	MTHFD2L
CSDE1 Signaling Pathway	0	0.0893	-1.342	EDC3,EDC4,LSM14A,PABPC4,TNC
Neurovascular Coupling Signaling Pathway	0	0.104	-0.209	ADORA2A,CACNA1E,CATSPER2,CHRM3,GAST,GRIA2,GRIA3,GRIN2D,KCNJ8,KCNN4,NPR3,NT5C,PLA2G5,PLB1,PNPLA8,PRDX6,PRKACA,PRKAG1,PRKAR1B,PRKG1,PTGS2,TBXA2R,TRPV4
Oxytocin In Brain Signaling Pathway	0	0.117	1.877	ATF2,CACNA1E,CATSPER2,CREB3,CREB3L3,GNAL,GNAO1,MAP2K1,MAPK7,MRAS,NRAS,PIK3C3,PIK3CA,PIK3CB,PIK3CG,PLA2G5,PLB1,PNPLA8,PRDX6,PRKCA,PTGS2,RAP2B,RASD1
IL-10 Signaling	0	0.0972	#NUM!	ELP1,IKBKE,IL1R1,IL1RAP,IL4R,REL,TRAF6
Aryl Hydrocarbon Receptor Signaling	0	0.108	0.707	ALDH18A1,ALDH3A2,ALDH5A1,ALDH7A1,ALDH9A1,ATR,CCNE2,E2F1,EP300,GSTO1,GSTO2,GSTZ1,NCOA2,RARB,REL,RXRB,TGFB2
Coagulation System	0	0.0857	#NUM!	PLAT,SERPINE1,VWF
FXR/RXR Activation	0	0.0873	#NUM!	AHSG,APOD,APOE,CYP27A1,FASN,FOXA2,MTTP,NR1H3,PCK2,VLDLR,VTN
Erythropoietin Signaling Pathway	0	0.115	1.147	BIRC3,CLCF1,Eda,FOXO3,HBB,IL15,LTB,MAP2K1,MRAS,NRAS,PIK3C3,PIK3CA,PIK3CB,PIK3CG,PRKCA,RAP2B,RASD1,REL,SOS1,TGFB2
TREM1 Signaling	0	0.117	1.414	CXCL3,ICAM1,IRAK1,Naip1 (includes others),NLRC3,PLCG2,REL,TLR2,TLR3
MIF Regulation of Innate Immunity	0	0.114	1	CD74,LY96,PLA2G5,PTGS2,REL
Role of NFAT in Regulation of the Immune Response	0	0.0562	1.461	ATF2,CABIN1,CHP1,CSNK1D,CSNK1G1,ELP1,GNA14,GNAL,GNAO1,GNAT1,GNAZ,HLA-A,HLA-DMA,HLA-DQA1,HLA-DQB1,IKBKE,KPNA3,LCK,MAP2K1,MRAS,NFATC2,NFATC4,NRAS,PIK3C3,PIK3CA,PIK3CB,PIK3CG,PLCG2,PPP3CC,RAP2B,RASD1,REL,SOS1
CCR5 Signaling in Macrophages	0	0.02	#NUM!	CACNA1E,CATSPER2,GNA14,GNAL,GNAO1,GNAT1,GNAZ,MRAS,PLCG2,PRKCA
Calcium-induced T Lymphocyte Apoptosis	0	0.0263	-0.905	CABIN1,CHP1,EP300,HLA-A,HLA-DMA,HLA-DQA1,HLA-DQB1,LCK,NFATC2,NR4A1,PPP3CC,PRKCA
Cytotoxic T Lymphocyte-mediated Apoptosis of Target Cells	0	0.0188	-0.447	BID,CASP7,CYC1,DFFA,DFFB,HLA-A,MR1,PRF1
IL-17 Signaling	0	0.102	1.147	ATF2,CLCF1,CXCL3,Eda,IL15,LTB,MMP2,MRAS,NRAS,PIK3C3,PIK3CA,PIK3CB,PIK3CG,PTGS2,RAP2B,RASD1,TGFB2,TRAF2,TRAF6
Airway Pathology in Chronic Obstructive Pulmonary Disease	0	0.0855	#NUM!	APOD,CLCF1,CXCL3,Eda,FGF23,IL15,LTB,MMP2,PRF1,TGFB2
CTLA4 Signaling in Cytotoxic T Lymphocytes	0	0.0209	#NUM!	AP1B1,AP1G1,AP2A1,HLA-A,LCK,MR1,PIK3C3,PIK3CA,PIK3CB,PIK3CG
Airway Inflammation in Asthma	0	0.0303	#NUM!	TGFB2
T Helper Cell Differentiation	0	0.0107	#NUM!	HLA-A,HLA-DMA,HLA-DQA1,HLA-DQB1,IL4R
B Cell Receptor Signaling	0	0.0555	2.556	ATF2,CAMK2B,CFL2,CREB3,CREB3L3,DAPP1,EBF1,ELP1,IGKC,IKBKE,INPP5D,INPP5F,INPP5J,MALT1,MAP2K1,MAP2K7,MAP3K3,MAP3K4,MRAS,NFATC2,NFATC4,NRAS,PAG1,PIK3C3,PIK3CA,PIK3CB,PIK3CG,PLCG2,POU2F2,PPP3CC,RAP2B,RASD1,REL,SOS1,VAV3
Regulation of IL-2 Expression in Activated and Anergic T Lymphocytes	0	0.0456	2.4	CARD11,CHP1,ELP1,IKBKE,LCK,MALT1,MAP2K1,MAP2K7,MRAS,NFATC2,NFATC4,NRAS,PABPC4,PLCG2,PPP3CC,RAP2B,RASD1,REL,SOS1,TGFB2,VAV3
Role of Cytokines in Mediating Communication between Immune Cells	0	0.0185	#NUM!	IL15
Dendritic Cell Maturation	0	0.0492	0.756	ATF2,CD1D,COL3A1,CREB3,CREB3L3,ELP1,HLA-A,HLA-DMA,HLA-DQA1,HLA-DQB1,ICAM1,IGKC,IKBKE,IL15,LTB,LTBR,MR1,PIK3C3,PIK3CA,PIK3CB,PIK3CG,PLCD1,PLCG2,PLCL1,PLCL2,REL,TLR2,TLR3,TRAF6
Cardiomyocyte Differentiation via BMP Receptors	0	0.0455	#NUM!	ATF2
ICOS-ICOSL Signaling in T Helper Cells	0	0.0356	1	CAMK2B,CHP1,HLA-A,HLA-DMA,HLA-DQA1,HLA-DQB1,IKBKE,INPP5D,LCK,NFATC2,NFATC4,PIK3C3,PIK3CA,PIK3CB,PIK3CG,PLEKHA1,PPP3CC,REL
Lipid Antigen Presentation by CD1	0	0.00962	#NUM!	AP1B1,AP2A1,ARF6,CD1D
Maturity Onset Diabetes of Young (MODY) Signaling	0	0.0897	#NUM!	APOD,APOE,APOO,CACNA1E,EP300,FOXA2,KCNJ8
DNA Methylation and Transcriptional Repression Signaling	0	0.118	#NUM!	MTA1,SAP130,SAP30,SIN3A
CREB Signaling in Neurons	0	0.103	0.962	ADCY6,ADCY7,ADGRA3,ADGRE5,ADGRF5,ADGRG1,ADORA2A,ADRB1,APLNR,ATF2,BMP6,C5AR2,CACNA1E,CAMK2B,CATSPER2,CHRM3,CREB3,CREB3L3,EP300,FLT1,FZD9,GNA14,GNAL,GNAO1,GNAT1,GNAZ,GPR143,GPR160,GPR180,GPR45,GPRC5C,GRIA2,GRIA3,GRIK3,GRIN2D,HGF,IGF1,LPAR4,MAP2K1,MRAS,NRAS,PDGFB,PIK3C3,PIK3CA,PIK3CB,PIK3CG,PLCD1,PLCG2,PLCL1,PLCL2,PRKACA,PRKAG1,PRKAR1B,PRKCA,PTGER2,RAP2B,RASD1,SMO,SOS1,TBP,TBXA2R,TGFB2
Type I Diabetes Mellitus Signaling	0	0.0434	-0.258	BID,CYC1,HLA-A,HLA-DMA,HLA-DQA1,HLA-DQB1,IKBKE,IL1R1,IL1RAP,IRAK1,IRF1,MAP2K7,PIAS1,PRF1,REL,SOCS1,SOCS2,SOCS5,SOCS6,SOCS7,TRAF2,TRAF6
Primary Immunodeficiency Signaling	0	0.0536	#NUM!	IGKC,LCK,RFXAP
Allograft Rejection Signaling	0	0.0149	#NUM!	H2-T24,HLA-A,HLA-DMA,HLA-DQA1,HLA-DQB1,IGKC,PRF1
Autoimmune Thyroid Disease Signaling	0	0.0133	#NUM!	HLA-A,HLA-DMA,HLA-DQA1,HLA-DQB1,IGKC,PRF1
Graft-versus-Host Disease Signaling	0	0.0113	#NUM!	HLA-A,HLA-DMA,HLA-DQA1,HLA-DQB1,PRF1
Communication between Innate and Adaptive Immune Cells	0	0.00646	#NUM!	HLA-A,IGKC,IL15,MR1,TLR2,TLR3
Systemic Lupus Erythematosus Signaling	0	0.0451	#NUM!	CBL,HLA-A,IGKC,INPP5D,LCK,LSM14A,LSM8,MRAS,NFATC2,NFATC4,NRAS,PIK3C3,PIK3CA,PIK3CB,PIK3CG,PLCG2,PRPF3,PRPF31,PRPF4,PRPF6,RAP2B,RASD1,RNPC3,SNRNP25,SNRPB2,SNRPN,SOS1,TXNL4A
CDC42 Signaling	0	0.0357	1.265	ARHGEF6,ATF2,CDC42BPA,CDC42EP2,CFL2,FGD1,H2-T24,HLA-A,HLA-DMA,HLA-DQA1,HLA-DQB1,ITGA2B,ITGA3,ITGB3,ITGB5,MYL1,MYL4,PAK1,PARD6A,WAS
FAK Signaling	0	0.0637	1.477	ACVR1B,ADGRA3,ADGRE5,ADGRF5,ADGRG1,ADORA2A,ADRB1,APLNR,ARHGEF6,C5AR2,CAPN1,CAPN7,CDH1,CHRM3,COL3A1,EFNA2,EFNA4,FLT1,FZD9,GPR143,GPR160,GPR180,GPR45,GPRC5C,IL15RA,IL17RD,IL1R1,IL3RA,IL4R,ITGA2B,ITGA3,ITGB3,ITGB5,KIT,LCK,LPAR4,MAP2K1,MAPK7,MAPKAPK5,MET,MMP2,MRAS,NRAS,PAK1,PIK3C3,PIK3CA,PIK3CB,PIK3CG,PLCG2,PTGER2,PTPRA,RAP2B,RASD1,SMO,SOCS1,SOCS2,SOCS5,SOCS6,SOCS7,SOS1,SPARCL1,TBXA2R,Tcf7,TGFB2,USF1…
Phospholipase C Signaling	0	0.0621	2.335	ADCY6,ADCY7,ARHGEF10,ARHGEF17,ARHGEF5,ARHGEF6,ATF2,CHP1,CREB3,CREB3L3,EP300,HDAC6,HDAC9,IGKC,ITGA2B,ITGA3,ITGB3,ITGB5,LCK,MAP2K1,MRAS,MYL1,MYL4,NAPEPLD,NFATC2,NFATC4,NRAS,PLA2G5,PLCD1,PLCG2,PLD1,PPP3CC,PRKCA,RAP2B,RASD1,REL,RHOBTB2,RHOF,RHOH,RHOT2,RHOU,SOS1
Altered T Cell and B Cell Signaling in Rheumatoid Arthritis	0	0.0184	#NUM!	HLA-A,HLA-DMA,HLA-DQA1,HLA-DQB1,IL15,LTB,REL,TLR2,TLR3
Atherosclerosis Signaling	0	0.116	#NUM!	ALOX12,APOD,APOE,COL3A1,ICAM1,LYZ,PDGFB,PLA2G5,PLB1,PNPLA8,PRDX6,REL,S100A8,SELPLG,TNFRSF12A
Regulation of eIF4 and p70S6K Signaling	0	0.118	0.905	EIF1AX,EIF2B1,EIF3B,EIF3I,EIF4E,EIF4EBP2,ITGA2B,ITGA3,ITGB3,ITGB5,MAP2K1,MRAS,NRAS,PIK3C3,PIK3CA,PIK3CB,PIK3CG,RAP2B,RASD1,RPS6,SOS1
B Cell Development	0	0.119	#NUM!	HLA-A,HLA-DMA,HLA-DQA1,HLA-DQB1,IGKC
Breast Cancer Regulation by Stathmin1	0	0.0914	1.361	ADGRA3,ADGRE5,ADGRF5,ADGRG1,ADORA2A,ADRB1,APLNR,ARHGEF10,ARHGEF17,ARHGEF5,ARHGEF6,ATF2,AURKA,BMP6,C5AR2,CAMK2B,CHRM3,CREB3,CREB3L3,E2F1,E2F7,FZD9,GPR143,GPR160,GPR180,GPR45,GPRC5C,HGF,IGF1,LPAR4,MAP2K1,MMP2,MRAS,NRAS,PAK1,PDGFB,PIK3C3,PIK3CA,PIK3CB,PIK3CG,PRKACA,PRKAG1,PRKAR1B,PRKCA,PTGER2,RAP2B,RASD1,SMO,SOS1,STMN1,TBXA2R,TGFB2,TUBA1C,TUBB2B
Neuroprotective Role of THOP1 in Alzheimer's Disease	0	0.1	0.632	ACE,DPP4,ENDOU,HGFAC,HLA-A,HPN,KLK3,KLK8,PRKACA,PRKAG1,PRKAR1B,PRSS53
CD28 Signaling in T Helper Cells	0	0.0408	2.324	CARD11,CHP1,ELP1,HLA-A,HLA-DMA,HLA-DQA1,HLA-DQB1,IKBKE,LCK,MALT1,MAP2K1,NFATC2,NFATC4,PAK1,PIK3C3,PIK3CA,PIK3CB,PIK3CG,PPP3CC,REL,WAS
NUR77 Signaling in T Lymphocytes	0	0.0341	0	CABIN1,CHP1,EP300,H2-T24,HDAC9,HLA-A,HLA-DMA,HLA-DQA1,HLA-DQB1,MAP2K1,MAP3K3,MAPK7,NR4A1,PDK1,PPP3CC,PRKCA,SIN3A
PKCθ Signaling in T Lymphocytes	0	0.054	1.8	CACNA1E,CAMK2B,CARD11,CATSPER2,CHP1,HLA-A,HLA-DMA,HLA-DQA1,HLA-DQB1,IKBKE,LCK,MALT1,MAP3K3,MAP3K4,MRAS,NFATC2,NFATC4,NRAS,PIK3C3,PIK3CA,PIK3CB,PIK3CG,PLCG2,POU2F1,PPP3CC,RAP2B,RASD1,REL,SOS1,VAV3
Role of Hypercytokinemia/hyperchemokinemia in the Pathogenesis of Influenza	0	0.0465	0	CXCL3,EIF2AK2,IFIT2,TLR3
Antiproliferative Role of TOB in T Cell Signaling	0	0.00939	0	CCNE2,CDC34,PABPC4,TGFB2
OX40 Signaling Pathway	0	0.015	#NUM!	H2-T24,HLA-A,HLA-DMA,HLA-DQA1,HLA-DQB1,REL,TRAF2
Intrinsic Prothrombin Activation Pathway	0	0.0732	#NUM!	COL3A1,KLK3,KLK8
IL-17A Signaling in Fibroblasts	0	0.105	#NUM!	IKBKE,NFKBIZ,REL,TRAF6
Role of JAK1, JAK2 and TYK2 in Interferon Signaling	0	0.115	#NUM!	PTPN2,REL,SOCS1
Role of JAK family kinases in IL-6-type Cytokine Signaling	0	0.08	#NUM!	OSMR,SOCS1
Dopamine-DARPP32 Feedback in cAMP Signaling	0	0.115	0.447	ADCY6,ADCY7,ATF2,CACNA1E,CHP1,CREB3,CREB3L3,CSNK1D,CSNK1G1,GRIN2D,KCNJ8,PLCD1,PLCG2,PLCL1,PLCL2,PPP3CC,PRKACA,PRKAG1,PRKAR1B,PRKCA,PRKG1
Embryonic Stem Cell Differentiation into Cardiac Lineages	0	0.1	#NUM!	HOXB5
Hematopoiesis from Pluripotent Stem Cells	0	0.00452	#NUM!	IGKC,KITLG
Transcriptional Regulatory Network in Embryonic Stem Cells	0	0.0741	#NUM!	CDYL,FOXC1,GATA6,RIF1
nNOS Signaling in Skeletal Muscle Cells	0	0.0625	#NUM!	CACNA1E,CATSPER2,SNTB1
Sphingosine and Sphingosine-1-phosphate Metabolism	0	0.111	#NUM!	NAAA
Retinoate Biosynthesis I	0	0.0732	#NUM!	AKR1B10,RBP2,RDH13
Thyroid Hormone Metabolism II (via Conjugation and/or Degradation)	0	0.0278	#NUM!	B4GAT1
NAD biosynthesis II (from tryptophan)	0	0.0833	#NUM!	NMNAT1
Nicotine Degradation III	0	0.0909	1	B4GAT1,CYP2U1,CYP51A1,FMO5,POR
Dopamine Degradation	0	0.103	#NUM!	ALDH3A2,ALDH7A1,ALDH9A1
Heparan Sulfate Biosynthesis (Late Stages)	0	0.107	0	EXTL2,EXTL3,HS6ST1,LIPE,NDST2,PLA1A,PNPLA7,PRDX6
Pyrimidine Ribonucleotides De Novo Biosynthesis	0	0.111	#NUM!	AK4,DHX29,NME1,NUDT18
Ubiquinol-10 Biosynthesis (Eukaryotic)	0	0.0333	#NUM!	Cyp2d22
Ketogenesis	0	0.0909	#NUM!	ACAA2
D-myo-inositol-5-phosphate Metabolism	0	0.113	1.606	CDC25A,DUSP10,DUSP12,DUSP16,FIG4,HACD2,INPP5D,INPP5F,NOCT,NT5C,NUDT11,PDCD1,PIKFYVE,PIP4K2A,PLCD1,PLCG2,PPM1K,PPP1R8,PPP3CC,PTPN2,PTPRF,STYX
Sucrose Degradation V (Mammalian)	0	0.1	#NUM!	KHK
Melatonin Degradation I	0	0.069	1	B4GAT1,CYP2U1,CYP51A1,POR
Pyrimidine Deoxyribonucleotides De Novo Biosynthesis I	0	0.087	#NUM!	AK4,NME1
Leukotriene Biosynthesis	0	0.0667	#NUM!	LTC4S
Chondroitin Sulfate Biosynthesis	0	0.105	1.633	B3GALT6,CHPF,CHSY1,HS6ST1,NDST2,XYLT2
tRNA Charging	0	0.103	-1	CARS2,KARS1,VARS1,WARS1
Dermatan Sulfate Biosynthesis (Late Stages)	0	0.087	0	CHST14,DSE,HS6ST1,NDST2
Dermatan Sulfate Degradation (Metazoa)	0	0.118	#NUM!	CEMIP2,HYAL1
D-myo-inositol (1,4,5,6)-Tetrakisphosphate Biosynthesis	0	0.112	1.698	CDC25A,DUSP10,DUSP12,DUSP16,FIG4,HACD2,INPP5D,INPP5F,IPMK,NOCT,NT5C,NUDT11,PDCD1,PIKFYVE,PPM1K,PPP1R8,PPP3CC,PTPN2,PTPRF,STYX
Nicotine Degradation II	0	0.111	-0.378	B4GAT1,CYP2U1,CYP51A1,FMO1,FMO5,INMT,POR
Serotonin Degradation	0	0.0615	-1	ALDH3A2,ALDH7A1,ALDH9A1,B4GAT1
D-myo-inositol (3,4,5,6)-tetrakisphosphate Biosynthesis	0	0.112	1.698	CDC25A,DUSP10,DUSP12,DUSP16,FIG4,HACD2,INPP5D,INPP5F,IPMK,NOCT,NT5C,NUDT11,PDCD1,PIKFYVE,PPM1K,PPP1R8,PPP3CC,PTPN2,PTPRF,STYX
TCA Cycle II (Eukaryotic)	0	0.0435	#NUM!	ACO2
Phenylalanine Degradation IV (Mammalian, via Side Chain)	0	0.0714	#NUM!	ALDH3A2
Bile Acid Biosynthesis, Neutral Pathway	0	0.111	#NUM!	AMACR,CYP27A1
Ketolysis	0	0.111	#NUM!	ACAA2
Pyrimidine Ribonucleotides Interconversion	0	0.118	#NUM!	AK4,DHX29,NME1,NUDT18
Glycolysis I	0	0.0769	#NUM!	BPGM,PFKL
Gluconeogenesis I	0	0.115	#NUM!	BPGM,ME2,ME3
Methylglyoxal Degradation III	0	0.069	#NUM!	AKR1B10,PRXL2B
Chondroitin Sulfate Biosynthesis (Late Stages)	0	0.0816	1	CHPF,CHSY1,HS6ST1,NDST2
Salvage Pathways of Pyrimidine Deoxyribonucleotides	0	0.111	#NUM!	TK2
Superpathway of Melatonin Degradation	0	0.0635	1	B4GAT1,CYP2U1,CYP51A1,POR
Histidine Degradation VI	0	0.0357	#NUM!	Cyp2d22
Noradrenaline and Adrenaline Degradation	0	0.0857	#NUM!	ALDH3A2,ALDH7A1,ALDH9A1
Pregnenolone Biosynthesis	0	0.0741	#NUM!	CYP27A1,Cyp2d22
Oxidative Ethanol Degradation III	0	0.104	#NUM!	ALDH3A2,ALDH7A1,ALDH9A1,Cyp2d22,CYP2U1
Ethanol Degradation II	0	0.0938	#NUM!	ALDH3A2,ALDH7A1,ALDH9A1
Agranulocyte Adhesion and Diapedesis	0	0.117	#NUM!	ACTA1,ACTA2,AOC3,Ccl27a,CKLF,CLDN11,CLDN23,Cxcl15,CXCL2,CXCL3,ICAM1,IL1R1,ITGA3,JAM3,MMP15,MMP2,MYH11,MYH3,MYL1,MYL4,MYO10,MYO5C,PF4,Ppbp,SELPLG
Granulocyte Adhesion and Diapedesis	0	0.0847	#NUM!	Ccl27a,CKLF,CLDN11,CLDN23,Cxcl15,CXCL2,CXCL3,ICAM1,IL1R1,IL1RAP,JAM3,MMP15,MMP2,PF4,Ppbp,SELPLG
TEC Kinase Signaling	0	0.052	1.789	ACTA1,ACTA2,BMX,GNA14,GNAL,GNAO1,GNAT1,GNAZ,ITGA2B,ITGA3,ITGB3,ITGB5,LCK,MRAS,PAK1,PIK3C3,PIK3CA,PIK3CB,PIK3CG,PLCG2,PRKCA,REL,RHOBTB2,RHOF,RHOH,RHOT2,RHOU,TEC,VAV3,WAS
Oxidative Phosphorylation	0	0.109	1.155	Atp5e,ATPAF1,COX10,COX4I2,COX7B,CYC1,DMAC2L,NDUFA12,NDUFB2,SURF1,UQCR10,UQCR11
HIPPO signaling	0	0.0706	-1	AJUBA,BTRC,CSNK1D,NF2,SCRIB,TEAD4
PCP (Planar Cell Polarity) Pathway	0	0.117	0.378	ATF2,CTHRC1,DVL2,FZD9,SMO,WNT2,WNT5B
Toll-like Receptor Signaling	0	0.115	0.707	EIF2AK2,IRAK1,LY96,REL,TLR2,TLR3,TNFAIP3,TRAF4,TRAF6
SAPK/JNK Signaling	0	0.0319	1.291	ATF2,DUSP10,LCK,MAP2K7,MAP3K3,MAP3K4,MRAS,NRAS,PIK3C3,PIK3CA,PIK3CB,PIK3CG,RAP2B,RASD1,SOS1,TRAF2
Xenobiotic Metabolism Signaling	0	0.118	#NUM!	ABCB1,ALDH18A1,ALDH3A2,ALDH5A1,ALDH7A1,ALDH9A1,ANKRA2,CAMK2B,CAT,EP300,FMO1,FMO5,GSTO1,GSTO2,GSTZ1,HS6ST1,MAP2K1,MAP2K7,MAP3K3,MAP3K4,MAPK7,MRAS,NCOA1,NDST2,NRAS,PIK3C3,PIK3CA,PIK3CB,PIK3CG,PRKCA,RAP2B,RASD1,REL,SOD3
Phagosome Formation	0	0.0977	2.216	ADGRA3,ADGRE5,ADGRF5,ADGRG1,ADORA2A,ADRB1,AP1B1,AP1G1,APLNR,ARF6,C5AR2,CFL2,CHRM3,FZD9,GPR143,GPR160,GPR180,GPR45,GPRC5C,IGKC,ITGA2B,ITGA3,ITGB3,ITGB5,LCK,LPAR4,MALT1,MAP2K1,MAP2K7,MAPK7,MRAS,MYH11,MYH3,MYL1,MYL4,MYO10,MYO5C,NAPEPLD,NRAS,PAK1,PIK3C3,PIK3CA,PIK3CB,PIK3CG,PIKFYVE,PIP4K2A,PIP4K2B,PLA2G5,PLB1,PLCG2,PLD1,PNPLA8,PRDX6,PRKCA,PTGER2,RAP2B,RAPGEF1,RASD1,SAP130,SMO,SOS1,TBXA2R,TLR2,TLR3,VA…
Serotonin Receptor Signaling	0	0.0444	#NUM!	ADCY6,ADCY7
Phototransduction Pathway	0	0.0741	#NUM!	GNAT1,PRKACA,PRKAG1,PRKAR1B
Chemokine Signaling	0	0.114	1.414	CAMK2B,MAP2K1,MRAS,NRAS,PIK3CG,PLCG2,PRKCA,RAP2B,RASD1
Dopamine Receptor Signaling	0	0.0633	-1.342	ADCY6,ADCY7,PRKACA,PRKAG1,PRKAR1B
Glutamate Receptor Signaling	0	0.0758	1	GRIA2,GRIA3,GRIK3,GRIN2D,HOMER3
NF-κB Signaling	0	0.0492	0.577	BRAF,BTRC,CARD11,EIF2AK2,EP300,FLT1,IL1R1,IRAK1,LCK,LTBR,MALT1,MAP2K7,MAP3K3,MRAS,NRAS,PIK3C3,PIK3CA,PIK3CB,PIK3CG,PLCG2,PRKACA,RAP2B,RASD1,TLR2,TLR3,TNFAIP3,TRAF2,TRAF6
T Cell Receptor Signaling	0	0.0632	0.822	AKT1S1,ATF2,CARD11,CBL,CHP1,ELP1,FOXO3,FYB1,H2-T24,HLA-A,HLA-DMA,HLA-DQA1,HLA-DQB1,ICAM1,IKBKE,ITGA3,LCK,MALT1,MAP2K1,MAP2K7,MRAS,NFATC2,NFATC4,NRAS,PAG1,PDK1,PIK3C3,PIK3CA,PIK3CB,PIK3CG,PPP3CC,RAP2B,RASD1,REL,RPTOR,SOS1,Tcf7,VAV3
G-Protein Coupled Receptor Signaling	0	0.113	1.463	ADCY6,ADCY7,ADGRA3,ADGRE5,ADGRF5,ADGRG1,ADORA2A,ADRB1,APLNR,ATF2,BRAF,C5AR2,CAMK2B,CHP1,CHRM3,CREB3,CREB3L3,ELP1,FOXO3,FZD9,GDPD3,GNA14,GNAL,GNAO1,GNAT1,GNAZ,GPR143,GPR160,GPR180,GPR45,GPRC5C,GRK4,IKBKE,KCNN4,LPAR4,MAP2K1,MAP2K7,MAP3K3,MAP3K4,MAPK7,MPPED2,MRAS,MYL1,MYL4,NAPEPLD,NFATC2,NFATC4,NPR3,NRAS,PAK1,PDE10A,PDE12,PDE3A,PDE3B,PDE4A,PDE5A,PDE7A,PDE8B,PIK3C3,PIK3CA,PIK3CB,PIK3CG,PLCG2,PNPLA8,P…
GPCR-Mediated Nutrient Sensing in Enteroendocrine Cells	0	0.119	-0.277	ADCY6,ADCY7,CACNA1E,CATSPER2,GAST,GNA14,PLCD1,PLCG2,PLCL1,PLCL2,PRKACA,PRKAG1,PRKAR1B,PRKCA
Gustation Pathway	0	0.0837	-1.213	ADCY6,ADCY7,CACNA1E,CATSPER2,CHRM3,DAGLB,KCNJ8,KCNN4,LDAH,LIPE,LIPG,PDE3A,PDE3B,PRKACA,PRKAG1,PRKAR1B,SCN7A
IL-15 Signaling	0	0.0304	2.138	AKT1S1,IGKC,IL15,IL15RA,LCK,MAP2K1,MRAS,NRAS,PIK3C3,PIK3CA,PIK3CB,PIK3CG,RAP2B,RASD1,REL,RPTOR
Inflammasome pathway	0	0.05	#NUM!	NAIP
PD-1, PD-L1 cancer immunotherapy pathway	0	0.115	0.905	HLA-A,HLA-DMA,HLA-DQA1,HLA-DQB1,LCK,MR1,PDCD1,PIK3C3,PIK3CA,PIK3CB,PIK3CG,TGFB2
Sumoylation Pathway	0	0.108	-1.414	CDH1,EP300,PIAS1,PML,RANGAP1,RHOBTB2,RHOF,RHOH,RHOT2,RHOU,SLC19A1
Th17 Activation Pathway	0	0.0165	0.816	IL1R1,IRAK1,NFATC2,NFATC4,PTGER2,REL,RUNX1,TRAF6
SPINK1 Pancreatic Cancer Pathway	0	0.0345	#NUM!	KLK3,KLK8
Apelin Liver Signaling Pathway	0	0.115	#NUM!	APLN,APLNR,COL3A1
BAG2 Signaling Pathway	0	0.061	#NUM!	PSMB9,PSMC6,PSMD2,PSME3,REL
FAT10 Signaling Pathway	0	0.0926	#NUM!	HTT,PSMB9,PSMC6,PSMD2,PSME3
FAT10 Cancer Signaling Pathway	0	0.1	-1	ACVR1B,IKBKE,MAD2L1,REL,TGFB2
T Cell Exhaustion Signaling Pathway	0	0.0355	0.577	ACVR1B,HLA-A,HLA-DMA,HLA-DQA1,HLA-DQB1,LAG3,MRAS,NFATC2,NFATC4,NRAS,PDCD1,PDK1,PIK3C3,PIK3CA,PIK3CB,PIK3CG,PLCG2,PRDM1,RAP2B,RASD1
Systemic Lupus Erythematosus In T Cell Signaling Pathway	0	0.0542	-0.343	AKT1S1,ATF2,CASP7,CBL,CHP1,CREB3,CREB3L3,H2-T24,HLA-A,HLA-DMA,HLA-DQA1,HLA-DQB1,MAP2K1,MAP2K7,MRAS,NFATC2,NRAS,PDK1,PIK3C3,PIK3CA,PIK3CB,PIK3CG,PPP3CC,RAB4A,RAP2B,RASD1,RHOBTB2,RHOF,RHOH,RHOT2,RHOU,RPTOR,SELPLG,SOS1
Systemic Lupus Erythematosus In B Cell Signaling Pathway	0	0.0585	0.949	CARD11,CBL,CHP1,CLCF1,Eda,FOXO3,IFIH1,IFIT2,IGKC,IL15,INPP5D,INPP5F,INPP5J,IRAK1,LCK,LTB,MALT1,MAP2K1,MAVS,MRAS,NFATC2,NFATC4,NRAS,PAG1,PDCD1,PIK3C3,PIK3CA,PIK3CB,PIK3CG,PLCG2,PPP3CC,PRKCA,RAP2B,RASD1,RASGRP3,REL,SOS1,TGFB2,TLR3,TRAF2,TRAF4,TRAF6
Inhibition of ARE-Mediated mRNA Degradation Pathway	0	0.101	-1.387	CNOT7,DIS3L,EDC3,EDC4,EXOSC3,EXOSC5,EXOSC9,LTB,MAPK7,PRKACA,PRKAG1,PRKAR1B,PSMB9,PSMC6,PSMD2,PSME3
BEX2 Signaling Pathway	0	0.0864	1.633	BAK1,KLK3,MMP2,REL,SMARCB1,Tcf7,TSC1
Xenobiotic Metabolism CAR Signaling Pathway	0	0.102	0.688	ABCB1,ALDH18A1,ALDH3A2,ALDH5A1,ALDH7A1,ALDH9A1,EP300,FMO1,FMO5,GSTO1,GSTO2,GSTZ1,HS6ST1,MAP2K1,MAP2K7,NCOA1,NDST2,PRKCA,SOD3
Xenobiotic Metabolism PXR Signaling Pathway	0	0.101	0.688	ABCB1,ALDH18A1,ALDH3A2,ALDH5A1,ALDH7A1,ALDH9A1,CAMK2B,CAT,EP300,GSTO1,GSTO2,GSTZ1,HS6ST1,NCOA1,NDST2,PRKACA,PRKAG1,PRKAR1B,PRKCA
Coronavirus Pathogenesis Pathway	0	0.0995	-0.894	ACE,ADAM17,CCNE2,DPP9,E2F1,E2F7,EIF4E,EP300,HDAC6,HDAC9,MAVS,NPC1,PIK3C3,PIKFYVE,PTGS2,REL,RPS6,SERPINE1,SIN3A,TLR3
Coronavirus Replication Pathway	0	0.0667	#NUM!	ACE,TUBA1C,TUBB2B
Complement System	0	0.0811	#NUM!	C1QBP,CFB,SERPING1

## Sheet: 工作表1
PI3K Signaling in B Lymphocytes	NGF Signaling	UVA-Induced MAPK Signaling	Glioblastoma Multiforme Signaling	FLT3 Signaling in Hematopoietic Progenitor Cells	Fatty Acid β-oxidation I	NAD Signaling Pathway	Thrombin Signaling	WNT/Ca+ pathway	Endothelin-1 Signaling	CNTF Signaling	GM-CSF Signaling	Reelin Signaling in Neurons	Ephrin Receptor Signaling	Gα12/13 Signaling	Phospholipases	Opioid Signaling Pathway	IL-2 Signaling	Kinetochore Metaphase Signaling Pathway	14-3-3-mediated Signaling	Eicosanoid Signaling	ERBB Signaling	Cholecystokinin/Gastrin-mediated Signaling	Triacylglycerol Biosynthesis	Aldosterone Signaling in Epithelial Cells	Antioxidant Action of Vitamin C	Xenobiotic Metabolism General Signaling Pathway	Natural Killer Cell Signaling	Pulmonary Healing Signaling Pathway	GPCR-Mediated Integration of Enteroendocrine Signaling Exemplified by an L Cell	Retinol Biosynthesis	Estrogen Biosynthesis	B Cell Receptor Signaling	Regulation of IL-2 Expression in Activated and Anergic T Lymphocytes	Phospholipase C Signaling	CD28 Signaling in T Helper Cells	Phagosome Formation	IL-15 Signaling
29	25	21	32	18	10	28	39	15	32	14	14	24	33	23	13	43	12	19	21	12	15	18	8	23	16	20	27	27	11	7	6	35	21	42	22	67	16
ATF2	ATF2	MRAS	CCNE2	ATF2	ACAA1	BMP6	ADCY6	ATF2	ADCY6,	MAP2K1,	CAMK2B	APOE,	ABI1,	CDH1,	LIPG,	ADCY6,	LCK,	ANAPC1,	AKT1S1	ALOX12,	HBEGF,	ATF2,	AGPAT2,	CRYAB,	GSTO1,	ABCA2,	CD226,	BRAF,	ADCY6,	AKR1B10,	AKR1B10	ATF2,	CARD11,	ADCY6,	CARD11,	ADGRA3,	AKT1S1
ATF5	CREB3	NRAS	E2F1	CBL	Acaa1b	CLOCK	ADCY7	CREB3	ADCY7,	MRAS,	,CISH,	ARHGEF10,	ANGPT1,	CDH24,	NAPEPLD,	ADCY7,	MAP2K1	ANAPC13,	,CBL,	HPGDS,	MAP2K1,	EPHA4	DGAT1,	Dnajb3,	GSTO2,	EP300,	CFL2,	CDH1,	ADCY7,	DAGLB,	,CYP2U1,	CAMK2B,	CHP1,	ADCY7,	CHP1,	ADGRE5,	,IGKC,
CAMK2B	CREB3L3	PARP2	E2F7	CREB3	ACAA2	ERN1	ARHGEF10	CREB3L3	BRAF,	NRAS,	MAP2K1,	ARHGEF17,	ATF2,	CDH4	PLA1A,	AP1B1,	,MRAS,	ANAPC2,	EDC3,	LTC4S,	MRAS,	,GAST,	LPCAT4,	DNAJC12,	IKBKE,	GSTO1,	COL3A1,	CFL2,	ADRB1,	LIPE,	CYP51A1,	CFL2,	ELP1,	ARHGEF10,	ELP1,	ADGRF5,	IL15
CBL	IKBKE	PARP4	FZD9	CREB3L3	ACSF2	H1-0	ARHGEF17	DVL2	CASP7,	PIK3C3,	MRAS,	ARHGEF26,	CFL2,	,ELP1,	PLA2G15,	AP2A1,	NRAS	ARPP19,	MAP2K1,	PLA2G5,	NRAS,	MAP2K1,	LPGAT1,	DNAJC25,	NAPEPLD,	GSTO2,	HLA-A,	EP300,	GNA14,	LIPG,	HSD17B11,	CREB3,	IKBKE,	ARHGEF17,	HLA-A,	ADGRG1	,IL15RA,
CHP1	MAP2K1	PARP9	IGF1	EIF4E	ACSL3	HGF	ARHGEF26	FZD9	GNA14,	PIK3CA,	NRAS,	ARHGEF28,	CREB3,	IKBKE,	PLA2G5,	ATF2,	,PIK3C3,	CDC16,	MRAS,	PLB1,	NRG2,	MAPK7,	LPIN2,	DNAJC4,	PLA2G5,	GSTZ1	IL15,	ETV5,	PLCD1,	PLB1	HSD17B7,	CREB3L3,	LCK,	ARHGEF5,	HLA-DMA,	,ADORA2A,	LCK
DAPP1	MAP3K3	PIK3C3	IGF2	INPP5D	ACSL4	IGF1	ARHGEF28	NFATC2	GNAL,	PIK3CB,	PIK3C3,	ARHGEF5,	CREB3L3	LPAR4,	PLB1,	BRAF,	PIK3CA,	CENPA,	NRAS,	PNPLA8,	PAK1,	MRAS,	MBOAT1,	DNAJC5,	PLB1,	,MAP2K1,	LCK,	FZD9	PLCG2,	RDH13	POR	DAPP1,	MALT1,	ARHGEF6,	HLA-DQA1,	ADRB1,	,MAP2K1
FOXO3	MAP3K4	PIK3CA	MAP2K1	MAP2K1	ECHDC3	NADK	ARHGEF5	NFATC4	GNAO1,	PIK3CG,	PIK3CA,	ARHGEF6,	,EFNA2,	MAP2K1,	PLCD1,	CACNA1E,	PIK3CB,	CENPC	PIK3C3,	PRDX6	PIK3C3,	NRAS,	PLPP5,	ICMT,	PLCD1,	MAP2K7,	MAP2K1,	,HBEGF,	PLCL1,	,RBP2,		EBF1,	MAP2K1,	ATF2	HLA-DQB1	AP1B1,	,MRAS
IKBKE	MAPK7	PIK3CB	MRAS	NRAS	ECHS1	NAPRT	ARHGEF6	PLCD1	GNAT1,	RAP2B,	PIK3CB,	CAMK2B,	EFNA4,	MAP2K7,	PLCG2,	CAMK2B,	PIK3CG,	,CENPL,	PIK3CA,	,PTGER2,	PIK3CA,	PRKCA,	TAZ	MAP2K1,	PLCG2,	MAP3K3,	MAP3K3,	LCK,	PLCL2,			ELP1,	MAP2K7,	,CHP1,	,IKBKE,	AP1G1,	,NRAS
IL4R	MRAS	PIK3CG	NF1	MRAS	ECI1	NMNAT1	CAMK2B	PLCG2	GNAZ,	RASD1,	PIK3CG,	DNAH10,	EPHA2,	MAPK7,	PLCL1,	CATSPER2	RAP2B,	CENPQ,	PIK3CB,	PTGES,	PIK3CB,	PTGS2,		PIK3C3,	PLCL1,	MAP3K4	MAP3K4,	MMP15,	PRKACA			IGKC,	MRAS,	CREB3,	LCK,	APLNR,	,PIK3C3
INPP5D	NRAS	PLCD1	NF2	PIK3C3	ECI2	NT5E	GATA6	PLCL1	MAPK7,	RPS6KA2,	PPP3CC,	GRIN2D,	EPHA4,	MRAS,	PLCL2,	,CREB3,	RASD1,	CENPU,	PIK3CG,	PTGIS,	PIK3CG,	RAP2B,		PIK3CA,	PLCL2,	,MAPK7,	MRAS,	MMP2,	,PRKAG1,			IKBKE,	NFATC2,	CREB3L3,	MALT1,	ARF6,	,PIK3CA,
MALT1	PIK3C3	PLCG2	NRAS	PIK3CA		PARP2	GNA14	PLCL2	MRAS,	RPS6KA5,	RAP2B,	ITGA3,	EPHB1,	MYL1,	PLD1,	CREB3L3,	SOCS1,	DNAH10,	PLCD1	PTGS2,	PLCG2,	RASD1,		PIK3CB,	PLD1,	MRAS,	NFATC2,	MRAS,	PRKAR1B			INPP5D,	NFATC4,	EP300,	MAP2K1,	C5AR2,	PIK3CB,
MAP2K1	PIK3CA	PLCL1	PDGFB	PIK3CB		PARP4	GNAL	PRKCA	NAPEPLD,	SOS1	RASD1,	LCK,	GNA14,	MYL4,	PNPLA8,	EP300,	SOS1	INCENP,	,PLCG2,	TBXA2R	PRKCA,	RHOBTB2,		PIK3CG,	PNPLA8,	NR1H3,	NFATC4,	NOTCH2,				INPP5F,	PABPC4,	HDAC6,	NFATC2,	CFL2,	PIK3CG
MRAS	PIK3CB	PLCL2	PIK3C3	PIK3CG		PARP9	GNAO1	REL	NRAS,		RUNX1,	LRP8,	GNAL,	NRAS,	PRDX6	GNA14,		MAD2L1,	PLCL1		RAP2B,	RHOF,		PIKFYVE,	PRDX6,	NRAS,	NRAS,	NOTCH3,				INPP5J,	NRAS,	HDAC9,	NFATC4,	CHRM3,	,RAP2B,
NFATC2	PIK3CG	PRKCA	PIK3CA	RAP2B		PDGFB	GNAT1	SMO	PIK3C3,		SOS1	MAP2K1,	GNAO1,	PIK3C3		GNAL,		PMF1/PMF1-BGLAP	,PLCL2,		RASD1,	RHOH,		PIP4K2B,	REL,	PIK3C3,	PAK1,	NRAS				MALT1,	PLCG2,	IGKC	PAK1,	FZD9,	RASD1
NFATC4	PLCG2	RAP2B	PIK3CB	RASD1		PIK3C3	GNAZ	WNT5B	PIK3CA,			MAP2K7,	GNAT1,	,PIK3CA		GNAO1,		NDC80,	PRKCA,		SOS1	RHOT2,		PIP4K2A,	SLC2A1	PIK3CA,	PIK3C3,	,PRKAA1				MAP2K1,	PPP3CC,	,ITGA2B,	PIK3C3,	GPR143,	,REL,
NRAS	RAP2B	RPS6KA2	PIK3CG	RPS6KA2		PIK3CA	MAP2K1		PIK3CB,			NECTIN3,	GNAZ,	,PIK3CB,		GNAT1,		,SKA2,	RAP2B,			RHOU,		PLCD1,	,TXNRD3	PIK3CB,	PIK3CA	,PRKAA2,				MAP2K7,	RAP2B,	ITGA3,	PIK3CA,	GPR160,	RPTOR
PIK3CA	RASD1	RASD1	PLCD1	RPS6KA5		PIK3CB	MRAS,		PIK3CG,			PDK1,	GRIN2D,	PIK3CG,		GNAZ,		SPC24,	RASD1,			SOS1,		PLCG2		PIK3CG,	,PIK3CB,	PRKAG1,				MAP3K3,	RASD1,	ITGB3	PIK3CB,	GPR180,
PIK3CB	REL	RPS6KA5	PLCG2	SOS1		PIK3CG	MYL1		PLA2G5,			PDK4,	ITGA2B,	RAP2B,		GRIN2D,		SPDL1,	TRAF2,			SRF		,PLCL1,		PRKCA,	PIK3CG,	PRKCA,				MAP3K4,	REL,	,ITGB5	PIK3CG	GPR45,
PIK3CG	RPS6KA2	SMPD2	PLCL1			POLRMT	MYL4		PLB1			PIK3C3,	ITGA3,	RASD1,		GRK4,		ZW10	TSC1,					PLCL2,		RAP2B,	PLCG2,	RAP2B,				MRAS,	SOS1,	,LCK,	,PPP3CC,	GPRC5C,
PLCD1	RPS6KA5	SMPD4	PLCL2			PRKAA1	NRAS		,PLCD1,			PIK3CA,	ITGB3	REL,		LCK,			TUBA1C,					PRKCA,		RASD1	RAP2B,	RASD1,				NFATC2,	TGFB2,	MAP2K1,	REL,	IGKC,
PLCG2	SMPD2	TNKS	RAP2B			PRKAA2	PIK3C3		PLCG2,			PIK3CB,	,ITGB5,	TBXA2R,		MAP2K1,			TUBB2B					SLC12A2,			RASD1,	SMO,				NFATC4,	VAV3	MRAS,	WAS	ITGA2B,
PLCL1	SMPD4		RASD1			PRKAG1	PIK3CA		PLCL1			PIK3CG,	ITSN1,	TEC,		MAP2K7,								SMO,			REL	SOS1,				NRAS,		MYL1,		ITGA3,
PLCL2	SOS1		RHOBTB2			SIRT4	PIK3CB		,PLCL2,			RAPGEF1,	MAP2K1,	VAV3		MAPK7								SOS1			,SOS1,	Tcf7,				PAG1,		MYL4,		ITGB3,
PLEKHA1	TRAF4		RHOF			SIRT5	PIK3CG		PLD1,			VLDLR	MRAS,			,MRAS,											TRAF6,	TGFB2,				PIK3C3,		NAPEPLD,		ITGB5,
PPP3CC	TRAF6		RHOH			SLC29A4	PLCD1		PRDX6,				NRAS,			NRAS,											ULBP1,	TLR2,				PIK3CA,		NFATC2,		LCK,
RAP2B			RHOT2			SLC7A5	PLCG2		PNPLA8,				PAK1,			OGFR,											VAV3,	WNT2,				PIK3CB,		NFATC4,		LPAR4,
RASD1			RHOU			TGFB2	PLCL1		PRKCA,				PDGFB,			PDK1,											WAS	WNT5B				PIK3CG,		NRAS,		MALT1,
REL			SMO			TNKS	PLCL2		PTGER2,				PIK3CG,			PIK3CG,																PLCG2,		PLA2G5,		MAP2K1,
VAV3			SOS1				PRKCA		PTGS2,				RAP2B			PPP3CC,																POU2F2,		PLCD1,		MAP2K7,
			TSC1				RAP2B		RAP2B,				RAPGEF1,			PRKACA,																PPP3CC,		PLCG2,		MAPK7,
			WNT2				RASD1		RASD1,				RASD1,			PRKAG1,																RAP2B,		PLD1,		MRAS,
			WNT5B				REL		SOS1				SOS1,			PRKAR1B,																RASD1,		PPP3CC,		MYH11,
							RHOBTB2						WAS			PRKCA,																REL		PRKCA,		MYH3,
							RHOF,									RAP2B,																,SOS1,		RAP2B,		MYL1,
							RHOH,									RASD1,																VAV3		RASD1,		MYL4,
							RHOT2									RGS12,																		REL,		MYO10,
							RHOU,									RGS19																		RHOBTB2,		MYO5C,
							SOS1									,RGS6,																		RHOF,		NAPEPLD,
							TBP									RPS6KA2																		RHOH,		NRAS,
																,RPS6KA5																		RHOT2,		PAK1,
																,SCN7A,																		RHOU,		PIK3C3,
																SOS1																		SOS1		PIK3CA,
																,SRF																				PIK3CB,
																																				PIK3CG,
																																				PIKFYVE
																																				,PIP4K2A,
																																				PIP4K2B,
																																				PLA2G5
																																				,PLB1,
																																				PLCG2,
																																				PLD1,
																																				PNPLA8,
																																				PRDX6,
																																				PRKCA
																																				,PTGER2,
																																				RAP2B,
																																				RAPGEF1
																																				,RASD1,
																																				SAP130
																																				,SMO,
																																				SOS1,
																																				TBXA2R,
																																				TLR2,
																																				TLR3,
																																				VAV3,
																																				VTN,
																																				WAS
