# Supplementary material for: Single-Cell Transcriptomic Profiles of Lung Pre-Metastatic Niche Reveal Neutrophil and Lymphatic Endothelial Cell Roles in Breast Cancer
Source: Cancers (Basel). 2022 Dec 28;15(1):176. doi: 10.3390/cancers15010176 (PMC9818165; doi:10.3390/cancers15010176)
Supplement: Supplementary file 1 [file cancers-15-00176-s001.zip › Table S14.csv]

gene_name	module	color	kME_M1	kME_M2	kME_M3	kME_M4	kME_grey	kME_M5	kME_M6
Ccl21a	M4	brown	0.337916039715825	0.327886336832712	0.328467085319668	-0.57482609419993	-0.424524385398511	-0.26186247210499	-0.305614478946175
Igfbp5	M1	blue	0.213197892668103	0.19638992200435	0.0564060602344194	-0.24926306696639	-0.291548269775911	-0.0756327882427988	-0.154333552600093
Fabp4	grey	grey	0.213420428173162	0.144149150402694	-0.149196321731785	-0.124602876138239	-0.214681782745051	0.11913068697296	0.000239520774667355
Cxcl2	grey	grey	0.126035178737021	0.0879559664970047	-0.0531091498045344	-0.0494475414686095	-0.186625851441115	0.188534485861079	0.124953389484824
Cytl1	M4	brown	0.353357547967192	0.288888088175269	-0.143359222306899	-0.205572659918051	-0.451821433632878	0.0961149264748136	-0.0809751101783602
Ptgs2	M5	green	0.146350426141946	0.120894747241702	-0.119543305320359	-0.0476924553073264	-0.125194100223318	0.224352832177737	0.114083216032676
Mt1	M4	brown	0.0408151763951259	0.0634998054985679	0.0311510898988621	0.0189258245153933	-0.117887219049558	0.15606969077842	0.159091923485621
Lcn2	M4	brown	0.253679199342213	0.252267067103149	0.199914851661641	-0.447576386333634	-0.329924361147326	-0.0678010691040583	-0.131357688114428
Selp	grey	grey	0.224587380565565	0.156675526301381	-0.193917690641877	-0.0808188895450652	-0.2123282464717	0.275126790599558	0.116561156348412
Ager	M2	yellow	-0.211571387019177	-0.28951254607448	0.0533511037669651	0.14785871784008	0.177299721653038	-0.0705059116910361	0.0145057510256986
Mmrn1	M4	brown	0.309055234367672	0.307657470576008	0.271946423740121	-0.540119571116833	-0.403470361684201	-0.182768547104978	-0.216264074350922
Slc6a2	M3	turquoise	0.215636052958965	0.116786668351413	-0.296027942164855	-0.0918439539297279	-0.089811478738222	0.143883723554452	-0.0528195481799375
Cxcl1	M5	green	0.128592478597686	0.148326434128163	-0.019418897831781	-0.00435386965309162	-0.207378832875928	0.275306370661358	0.190525052869018
Vwf	M3	turquoise	0.412187060298152	0.270222975131536	-0.397699450944533	-0.21931804363273	-0.309352824733381	0.121023667631419	-0.158549863081686
Fgl2	M4	brown	0.344507529734997	0.33858376553341	0.127603842867092	-0.515273152674758	-0.420755705202191	-0.106075533246811	-0.227405979207522
Clu	grey	grey	0.201048232449374	0.1404183572358	-0.0959460627531753	-0.110054782072617	-0.306071932635684	0.107269922760273	-0.0144022026911667
Cxcl12	M3	turquoise	-0.0259035515698961	-0.0503416814438408	-0.23637290281035	0.0523407466374072	0.0854991177971172	0.0571691838870729	0.00123890524371954
Lrg1	M5	green	0.32517952593077	0.229854298121035	-0.280801544091891	-0.202549431186467	-0.21694757029141	0.164979598202079	-0.06482077449921
Mt2	M4	brown	0.0372216464623639	0.0454828093161967	0.029025274799125	0.00321026720043228	-0.119096985500907	0.128703658016596	0.128745140737946
Spp1	M2	yellow	-0.00219316165514617	-0.0574682074617331	0.0204155160958433	0.00302840585020883	0.0349331706246444	0.0344871030513672	0.0324531774075423
Car4	grey	grey	-0.144126798945861	-0.232534340147912	-0.0509238843212627	0.0935853558107343	0.231058825659648	-0.0958422000673326	-0.0403559123667805
Mbd1	M3	turquoise	-0.226896042557657	-0.140347854244245	-0.0369855905927817	0.252745806739524	0.206132909572487	0.0941782785882366	0.197296186356467
Pf4	grey	grey	-0.105498430149858	-0.211122129797297	-0.00381849462646349	0.0570399147441772	0.0992621099562588	-0.030201254042859	-0.00967455462902465
Hspa1a	M5	green	-0.131028274576377	-0.0996991008442637	-0.230529923348979	0.258963929647935	0.171019501102516	0.442228858788785	0.324823936507269
Sele	M3	turquoise	0.16775286905774	0.146568845244253	-0.0968772671304509	-0.0559055592366623	-0.172427178210349	0.201328215355557	0.112044063174926
Serpina1b	M2	yellow	0.151420776836945	0.12520437278198	-0.0804233873806408	-0.115278923079064	-0.20926903574139	0.00679132913612768	-0.0605652992198081
Sfrp1	M1	blue	0.186567877835747	0.192680832792931	-0.0290583675061885	-0.123033773335441	-0.302545886989016	-0.0321613571292956	-0.105836985250191
Fabp5	M3	turquoise	0.10810458192017	0.0796253443910495	-0.0734912296160089	-0.0640680272137719	-0.0834858766433389	-0.0211828694310152	-0.0797471353897014
Cfh	M1	blue	0.116555359818439	0.122650876580262	-0.0340017977885623	-0.0889121071943504	-0.202133627837354	-0.0203467833111907	-0.0829451145969192
Thbs1	M4	brown	-0.227104431370914	-0.0939442075290568	0.0674162668918801	0.319294614637877	0.187402216029172	0.163909099292332	0.292373887138753
Prss23	M3	turquoise	0.417776008422607	0.251793175711215	-0.402557377625845	-0.256321847770653	-0.275138505743793	0.144499211630107	-0.142789530194945
Ccn2	M1	blue	-0.405632394723765	-0.180706766999559	0.00941790094094783	0.447323458637258	0.367855976470165	0.0753662116454305	0.257102414105558
Cyp1a1	grey	grey	0.184452552717105	0.142646449428449	-0.190441562315196	-0.07021468571492	-0.120849918443691	0.17289004410645	0.0485704829057798
Serpina3g	M6	red	0.176314525882665	0.127624076675749	-0.195831292093721	-0.0988577959729687	-0.100939323942595	0.0930453457037195	-0.0566745125680436
Hspa1b	M5	green	-0.0217595900562193	-0.0791454227616888	-0.235599257470685	0.117436994650471	0.0513314378636963	0.281194208034909	0.147938672460629
Ccl2	M6	red	-0.121994193101142	-0.0493927575951329	0.106971045258481	0.162267760311428	0.103633626555927	0.0919938158864753	0.212205826569385
Dcn	M1	blue	-0.0267918242243629	-0.00555724116263217	0.0382699477042795	0.00799438947041965	-0.00308085470630689	-0.0455221164440065	-0.0144887790629944
Mfap4	M1	blue	-0.674781382632213	-0.574430024102056	0.0438079333134913	0.582345382095831	0.619191246576589	0.0145763139332994	0.267881057726261
Gdf15	M3	turquoise	0.0181715109529424	-0.0235744264701784	0.000353810302353838	-0.00297152168255048	-0.0118832488146601	0.0981463789153022	0.0897386997838366
Hbegf	M5	green	0.0906674715923853	0.0562149305689195	-0.130308757111559	0.0103105065248472	-0.0824147293974285	0.334648459276835	0.205105231692092
Cpe	M1	blue	0.377016599129186	0.292812515073208	-0.183504521061061	-0.209070466746487	-0.439850031247232	0.160425952706636	-0.0693580051421885
Igfbp2	M2	yellow	-0.159291906691974	-0.186977636680458	0.0581530452929522	0.102385815378125	0.111580489678304	-0.0682591856668595	0.00825584554044762
Cd74	M3	turquoise	-0.101151556635076	-0.168738434153478	-0.440241743375971	0.189309622475057	0.211155612698672	0.171414754256911	0.0457215697694612
Igfbp4	M3	turquoise	0.340771297521232	0.183968185866611	-0.164222004047136	-0.334021425780983	-0.316469926363273	0.082828301078521	-0.183384998397115
Fxyd6	grey	grey	0.313296160826651	0.318186376611312	0.267748594273528	-0.511044271629114	-0.408127092574609	-0.14864229452113	-0.204884062420196
Fbln2	M4	brown	0.283296529484466	0.254641816127764	-0.0318393346657156	-0.234498045709391	-0.411208605246385	0.0443652155515063	-0.0572376565359009
Hopx	M2	yellow	-0.482997408187095	-0.646438003208354	-0.0688122618691158	0.414148558681078	0.510454632042928	0.0314015328187932	0.162203124570942
Procr	M5	green	0.270591242821196	0.230025040106676	-0.179247245418378	-0.13240833181577	-0.25385945608642	0.236377366022135	0.0690700595786462
Nrgn	M2	yellow	-0.0595097156587416	-0.216684836573046	-0.0457779381313311	0.0287280999436926	0.0843886299196004	-0.0200956889228931	-0.0142536882843441
Dusp2	M5	green	0.148255027464874	0.143145540390225	0.0618805933808953	-0.221774096969501	-0.138931235854618	0.136245529168277	0.0867113981482762
C4b	grey	grey	-0.147299398034107	-0.0596553733189556	0.0192961717563933	0.137066470567704	0.118986436397247	0.0269945873155993	0.0634917753049713
Maf	M1	blue	0.1790526031112	0.209516533823233	0.332074339681757	-0.43054884404063	-0.279651808976629	-0.233882992951192	-0.17389601875191
Serpine1	M4	brown	-0.388476519850464	-0.225283059501844	0.177179164351393	0.446313786421833	0.350830516267623	0.120038930237049	0.40039175393055
Rgs16	M4	brown	0.121028780212597	0.142205307218542	0.10531293659889	-0.147300070653482	-0.137481811983943	0.106054090013576	0.0644146149012289
Ch25h	grey	grey	0.274815963575081	0.198382681275013	-0.275931845961643	-0.138255860559267	-0.182625840451009	0.185294514107453	-0.0323486765554044
Cygb	grey	grey	0.248741554910011	0.167118952415464	-0.277868299370724	-0.123882812557235	-0.167722608297701	0.12111733443436	-0.0741017386889259
Spata7	M4	brown	-0.0496896517170407	0.00388439992299469	0.02136591123348	0.0875310272201624	0.0561120463088366	0.00919773397931239	0.0485753211659382
Igf2	grey	grey	0.100907492266509	0.0706682779831524	-0.000249095027059689	-0.068615954481457	-0.139633947898728	0.0492105880799916	0.0220176576432237
Sftpc	M1	blue	-0.0554985923100228	-0.0811831595542292	-0.0130306069729542	0.0736920260071952	0.0848906426908925	0.0697278357743055	0.10925543235334
Serpinb1a	M3	turquoise	0.154002660944336	0.0727037754531685	-0.223121284469553	-0.0527183014275614	-0.0768689994362055	0.0953966308575122	-0.0377452145052175
Cdh13	grey	grey	0.270020534407496	0.240925565258047	-0.0911770572647424	-0.176061508496503	-0.396532783842859	0.0757106654681534	-0.0526480488666071
Iigp1	M6	red	-0.0714424893424082	-0.0108885488422351	-0.0381365137499017	0.130496886714959	0.0984533571373841	0.0991822927298985	0.107406656382357
Tmem252	M3	turquoise	0.165353361683125	0.0653576369765037	-0.515006462926932	0.027224710183733	0.0172246965306364	0.321412112085843	0.0420515688768473
Rbp7	grey	grey	0.168846031164818	0.152719270215326	0.036447886878275	-0.204218408940842	-0.228167021439723	-0.0391080593819275	-0.08032512811694
Ctsh	M1	blue	0.377775412978727	0.316554183394781	-0.156624474021305	-0.222197383616083	-0.43283528634238	0.102773492580141	-0.0804859018107493
Ephx2	M3	turquoise	0.117368829074951	0.111678407088251	-0.0247643555486403	-0.0744019473823461	-0.180306472692999	0.00547354195852936	-0.054632341496389
Tmem158	M1	blue	0.246326997253199	0.233825855267752	-0.0732463165365512	-0.142778691019716	-0.349093680842224	0.10095103703894	-0.0173717209727636
Sulf1	M3	turquoise	0.245196150394797	0.212221569621508	-0.0748708608179992	-0.144380968172373	-0.351008244847414	0.0513237340160483	-0.0534422223929865
Igfbp6	M1	blue	-0.301473777788973	-0.162180564860696	0.140259146490255	0.24295744018175	0.218628802348003	-0.0440325035100814	0.121483870344002
Lyve1	M3	turquoise	0.392995361297115	0.221384011052155	-0.344809276904123	-0.273399310324817	-0.26604499497126	0.13193236891107	-0.152554339142608
Myc	M4	brown	0.157160536631139	0.156464867600028	0.0126660478518375	-0.0889769117229031	-0.216180130047756	0.207232913280663	0.144125495978024
Htra1	M1	blue	0.200510321573646	0.194570442467402	-0.0443382382987997	-0.111207543585419	-0.315518059097539	0.0259369867296576	-0.0482547525064372
Col3a1	M1	blue	-0.44327433278165	-0.255816958026861	0.150408524685155	0.329477165387194	0.33139291473044	-0.0361417107114673	0.152048065340291
1200007C13Rik	M1	blue	-0.19511757169666	-0.135796560891625	0.071859806707598	0.199183195591416	0.15818229674701	0.0396187604003555	0.155074364494999
Flt4	M3	turquoise	0.296110839105405	0.272575434684303	0.236230815356191	-0.494351186617316	-0.366996686826692	-0.178981167320334	-0.243262621471489
Atp13a3	M5	green	0.0418299486707601	0.0819881811041009	-0.0637675119135992	-0.0134239428956827	-0.0417149180384097	0.123475355619214	0.0895417488803552
Pdpn	M2	yellow	0.13838294285131	0.143089678973008	0.224080246383467	-0.307867643253254	-0.233116142471455	-0.172573782652564	-0.170053893388771
Plac8	M3	turquoise	0.261366686229324	0.189776162171358	-0.252323419452744	-0.122956798100221	-0.212226618248072	0.0949918020377011	-0.0718413277982403
Apoe	M1	blue	-0.583128459369103	-0.393511144016593	0.160604334700321	0.517842002770482	0.352358896843526	0.00042597415600507	0.271525542384333
Plat	M3	turquoise	0.128267611689792	0.129496593713468	-0.140276273090045	-0.00280291123631526	-0.138675384242831	0.148348430185989	0.0402079789451362
Pi16	grey	grey	0.173928457541226	0.144145404053189	-0.0421066869049933	-0.117765945097917	-0.283167905454639	0.0267497237001252	-0.0454525027166582
Samd5	M3	turquoise	0.310547878102776	0.191404776624109	-0.354176023719794	-0.153982267351695	-0.203775850397041	0.128282597758697	-0.0798997292219732
Edn1	M3	turquoise	0.156526809708415	0.0708364938677559	-0.377148444165814	-0.00299678446323033	-0.0206401553019995	0.221963546969209	0.0222408019751955
Rasl11a	M4	brown	-0.115080861028423	-0.00410479069269874	-0.00884947087360502	0.233250645698588	0.103068296070404	0.203868816220775	0.25451928196875
G0s2	M1	blue	-0.639301646602824	-0.369290542332539	0.214699123275315	0.534125795166618	0.522894500348883	-0.0454353675394818	0.326484259875713
Ccn1	M1	blue	-0.398395110677212	-0.242003014196412	0.10676280069262	0.382105181905569	0.280813086958871	0.155111202470843	0.313368488548129
Gm13889	M5	green	-0.214794476429044	-0.271951553602416	-0.297736822084694	0.320489076332484	0.290595764392098	0.404248552366758	0.294257094911536
Mal	M4	brown	0.163175224204021	0.165350903367894	-0.0802861368144165	-0.0945981803569637	-0.168327912663186	0.0734664713160987	-0.00835091422235327
Cxcl10	M6	red	-0.0583767735266358	-0.0203290895916562	-0.0234436791450471	0.108761470603379	0.0665031137973581	0.125509990594676	0.168704770848984
Thy1	M4	brown	0.223118912791739	0.194807918103219	0.212325151645173	-0.394506578793084	-0.274507429037564	-0.149895453664115	-0.17652197888306
S100a4	grey	grey	0.113059894816047	0.0561347804213389	-0.0177586587690609	-0.0490893472546812	-0.193695411622306	0.0481099608667621	-0.0314825509035693
Saa3	M1	blue	-0.104155361394776	-0.0693439051997358	0.0477185688040989	0.0776808986726889	0.107902522873142	0.000928196005250542	0.0614864834582037
Dnajb1	M5	green	-0.147024036314903	-0.171084941055383	-0.1813104741385	0.240842464440073	0.119816793993208	0.499857715401231	0.382420874142276
Icam1	M5	green	0.102478021535022	0.0741118355128654	-0.345626310128783	0.102117274025842	-0.0511409808582985	0.510512770456174	0.264200989882735
Tnfsf9	grey	grey	0.0639789248251152	0.0735941553840549	0.00313742001791809	0.0225428001490331	-0.0829740536524145	0.11302298968107	0.0685376617063577
Vcam1	M1	blue	0.134500169091465	0.140536721741093	-0.193545088827235	0.0113439948058165	-0.122875994881073	0.189656552443701	0.0410778985292124
Tgfbi	grey	grey	0.172908110035659	0.178230342061781	0.162078548905701	-0.316862847381238	-0.261070583418837	-0.123304763229343	-0.147583787688775
Gja4	M3	turquoise	0.204148090419582	0.143114356316843	-0.288835788780725	-0.0580830157522526	-0.194855550543844	0.111661861612458	-0.0534903299166162
Hpgd	M3	turquoise	0.0218003150356628	-0.195586723239486	-0.584834435861762	0.0904220274225178	0.156348393350229	0.223933556154387	-0.0348477929333255
Ccdc80	M1	blue	0.25338819842345	0.249739349965804	-0.0908736782715395	-0.145264775354766	-0.329646544119297	0.0568411637488619	-0.0641684111496016
Igfbp3	M1	blue	-0.366339974970428	-0.190105230881689	0.157541329322223	0.279408351097935	0.251718361758579	-0.00987710409081125	0.152581371241997
Adm	M4	brown	-0.31436759887256	-0.15448084612918	0.167743919222189	0.297916156632941	0.206747496758689	0.0790979556405376	0.270387798435222
Pgf	M4	brown	0.22649526551072	0.180832163580633	0.164175389204897	-0.35179651903247	-0.250124317872862	-0.0497532926496598	-0.0719399920657143
Apoc1	M1	blue	-0.167444535475491	-0.123953339420907	0.0312967315254573	0.109313348919951	0.128953144399306	-0.0194625926739307	0.0476207570570671
Mgp	M1	blue	-0.472129128465776	-0.257493321827	0.146357074209196	0.488415544444193	0.230802414430342	0.0671869056506176	0.29337796804655
Tagln	M1	blue	-0.504648953829832	-0.328650922193458	0.139131322566703	0.436353027321999	0.409053024669603	0.00401240693877424	0.230244876505388
F830016B08Rik	M4	brown	-0.114854246263986	-0.0381008523218395	0.02286493344853	0.127897737715224	0.102468979552752	0.0142880400982643	0.108466364044436
Cxcl14	M1	blue	-0.513028957717261	-0.298999553760927	0.158726368007801	0.423590242869067	0.37482515172494	-0.0468895796900315	0.214456980035594
Fam3c	M2	yellow	0.209003010178843	0.179415926247554	-0.0731876346698547	-0.0908114113783149	-0.288158101530262	0.0482200721438755	-0.0364573095936529
Pou2f2	M1	blue	-0.0330280400819125	-0.0484554886170679	-0.0337184632141948	0.0561215906066688	0.0212905185661687	0.0986510785462461	0.108264993866098
Rad51ap2	grey	grey	-0.13365240246452	-0.0604538141522744	0.0249680364925595	0.105631470021505	0.14011798833143	-0.0131195853648774	0.0403777121610934
Hspb1	M4	brown	-0.429311429876302	-0.267400929788473	0.0387075731326021	0.526270059298274	0.318162910115451	0.327335874304655	0.474483407370852
Eln	M1	blue	0.183199576591436	0.172298126363329	-0.160182040933838	-0.0691199081055034	-0.188472472249417	0.0666398789095709	-0.0723416753177825
Gja5	M1	blue	0.0424208202824826	0.100240214694126	0.00634040183500419	0.0108988368445986	-0.166509069455362	0.0357430074961632	0.0299854223901329
Gm26917	M1	blue	-0.100197193445928	-0.0580841752050052	0.0240565803049155	0.0187514713157204	0.104086244519	-0.154796799311802	-0.0475303846777767
Id1	M3	turquoise	0.254306246823768	0.141173438982462	-0.369790940961112	-0.0876871210490969	-0.15447849222679	0.343654787203427	0.073514299311562
Serpinb6b	M2	yellow	0.248450005577151	0.189102282571884	-0.239048431492232	-0.153613971924152	-0.215113095316334	0.0732231530874614	-0.120969923327351
Csrp2	M3	turquoise	0.326388713839256	0.163453635250822	-0.395901959217472	-0.154632347702427	-0.185103495465778	0.154033401906766	-0.119936577294601
Ptx3	grey	grey	0.106050042262884	0.0539586125227441	0.0706638440938474	-0.167753549063729	-0.0936590563385657	0.00934927301987037	-0.0202389378025489
Crispld1	M1	blue	0.193971430882961	0.1516573790344	-0.0948299635812901	-0.0995553925413058	-0.22133526345113	0.0561489083269589	-0.0422687136469392
Gm34455	grey	grey	-0.195850261718816	-0.0821316130255119	0.0678736403577856	0.169268275612869	0.200943444313872	-0.0419139739884702	0.123802628588448
Tm4sf1	M3	turquoise	0.362928389734631	0.172316870463978	-0.504436693737405	-0.161527487529858	-0.314790902926476	0.26737351529665	-0.0990133747731975
Atf3	M5	green	-0.112583854898108	-0.0934400811895453	-0.179034645674983	0.279148469907253	0.0970691060989485	0.687394185170185	0.533765470316872
Ctla2a	M3	turquoise	0.103777777071971	-0.147885338266194	-0.58926012366557	0.0305085524475927	0.0625199913920177	0.285223469474363	-0.0332858880483443
Apold1	M3	turquoise	0.295826080657335	0.24613537364553	0.0826808300784174	-0.364786193486586	-0.294709761705932	0.136560212908325	0.00841795154705555
Ppbp	M1	blue	-0.0927923753303794	-0.190658014463835	-0.0118131029950598	0.0458659456201345	0.0804182653781261	-0.0530804002782127	-0.0385813950429154
Bmx	M3	turquoise	0.270418352866673	0.257148913361233	-0.068306810350217	-0.147915396258677	-0.346747151348635	0.0949933631874285	-0.0340116396104413
Acta2	grey	grey	0.00609589042240633	-0.0233315285912453	-0.0493046843220702	0.00622179217663105	0.033182648095833	-0.00116157574850643	0.00314643263372995
Perp	M2	yellow	0.145066568479049	0.147609719635664	-0.0282314467508475	-0.0554312030135161	-0.190662393237295	0.0780537113880379	0.0334774678122651
Inmt	M1	blue	-0.883525609799412	-0.627139814922557	0.243665680657262	0.73043996921917	0.698693019642967	-0.0404357637477309	0.377553063397067
Tnfaip6	M4	brown	-0.104102351735736	-0.0837452340187702	0.0453127396744954	0.129289529952325	0.0924852385834796	0.0750781464096112	0.130632333990686
Nr4a1	M6	red	-0.154778677047218	-0.0492001018574629	0.0277795620386787	0.290063930248731	0.0976776679557474	0.31559202941292	0.434218765446987
Car8	M5	green	0.384131007315673	0.274917001730669	-0.330598691479496	-0.196990825805003	-0.309528078784088	0.153237537312989	-0.0978676234706279
Sox4	M5	green	-0.0720597900520897	-0.0564554212285257	-0.155946970410274	0.146753028808626	0.133521628780767	0.223979087769913	0.197637677862103
Rrad	M4	brown	-0.0740053877320853	-0.0163939321191046	0.0439173001545702	0.122652393885266	0.0545098063919125	0.0609136316362486	0.146904635912414
Gm20186	M3	turquoise	0.13977631685296	0.0536272105894962	-0.124517767251367	-0.0715135043031182	-0.0792493507039799	0.0861176109256839	-0.00356336485558951
Peg3	grey	grey	-0.105656645514021	-0.0859649233927346	-0.0607157258548847	0.132449853574248	0.14561453107042	0.0716399541964314	0.0902340043675995
Crip1	M3	turquoise	0.222244353372337	0.0257104990965604	-0.287869999958167	-0.139763327477011	-0.236838740505077	0.139231414420318	-0.106092019977367
S100a6	M1	blue	-0.237401708230362	-0.2748862309298	0.180715790430785	0.108900320881659	0.00214510110074624	-0.0787449017354795	0.0251232657418772
Neurl3	M3	turquoise	0.0220946745229468	-0.051476699164789	-0.250671793410171	0.0673026178911292	0.0428777063927289	0.295388934501702	0.153870396941208
Depp1	M5	green	0.0122579463906163	-0.0609139095868488	-0.118660948216588	0.0383841424858705	0.0401771799950279	0.125141112466928	0.0392079052156365
Gsn	M1	blue	-0.913872068723714	-0.631937848553255	0.28879989675568	0.728948056048037	0.68973123759389	-0.0531528443440257	0.370587858595263
Isg15	M5	green	0.0774356266238403	0.0566179084770516	-0.128737971263455	-0.0252752252148216	-0.0626899216250119	0.150760192361331	0.0712081673689177
Serpinf1	grey	grey	0.114067511400653	0.121048317445258	-0.0109103500581117	-0.0686569967183976	-0.208272441544583	0.000189224167961047	-0.0349538852011266
Tnfaip3	M5	green	0.0492675563586951	0.0567803422153337	-0.169570311607739	0.0901855630471539	-0.0302350671712617	0.429868705688478	0.305876740705387
Plek	M2	yellow	-0.00516242764111135	-0.156222189260612	-0.0563659453066977	-0.00618219557914352	0.0219329984524933	0.00497691470780805	-0.00462863065220423
Myl9	M2	yellow	-0.108416200469749	-0.157789163315428	-0.0194242202100765	0.0911210924929004	0.107544272137304	-0.0312332436269056	-0.00168886962609047
Macf1	M1	blue	-0.769224264516648	-0.512360346689207	0.157402928464466	0.653980070791029	0.634631231907951	0.00490816161060393	0.3841494508993
Tcf21	M1	blue	-0.668967763977124	-0.402459489396569	0.246148497829677	0.539116050279663	0.539877268912262	-0.0420136978487701	0.323185866628009
Ifi27l2a	grey	grey	0.0932574514903738	0.147052967289975	0.125432808269703	-0.167721173737856	-0.153076837879311	-0.0715256921067509	-0.0592210353648448
Cldn18	M2	yellow	-0.285126282053159	-0.547346170954346	-0.0174717280001769	0.213145748081376	0.282203870634177	-0.0586399155831549	0.0171653735541794
Kcnq1ot1	M6	red	-0.0776840965316372	0.0076958117269264	-0.0045217694980991	0.123288601457574	0.0388103159323197	0.101612211934886	0.198786836472538
Hs3st1	M3	turquoise	0.239125811368457	0.104579971097206	-0.31394639078821	-0.106708310841933	-0.165107068708982	0.155512777035466	-0.0337532561692728
D10Wsu102e	M4	brown	-0.0618275366055318	-0.0330377744764274	0.00707810605507213	0.103076807821066	0.0614854616575183	0.10621938271039	0.144744192498048
Comp	M4	brown	0.0995024816569268	0.121424267716711	0.0952017440581301	-0.18316929307079	-0.14708321608555	-0.0988089162465604	-0.134189122751452
Rgs2	M4	brown	-0.451738534556237	-0.278074596078081	0.11061737640248	0.465791970226152	0.410192515372726	0.0343430986872309	0.311887819743383
Serpina3f	M3	turquoise	0.141396385287185	0.0956450384936609	-0.239761652471162	-0.0270495900909578	-0.0430999114911963	0.194462475317394	0.0269952778948211
Gata6	M3	turquoise	0.284257978609654	0.232679780571856	-0.171460791212513	-0.126847597346526	-0.296227034932196	0.193729552865694	0.0144286968045317
Lbp	M3	turquoise	0.398448637085596	0.327242427351443	-0.101951653906406	-0.401850491839834	-0.380835901828982	0.0595784119393524	-0.163424687008299
Ifitm1	M1	blue	-0.0969160131833582	-0.151753289067956	0.0180378409666576	0.112702357531357	0.0732760072205588	0.0431641075959651	0.104548879098183
Igfbp7	M1	blue	-0.649645970375976	-0.565522277324146	0.158276968172225	0.506392953112706	0.482247124473888	0.00611154922560229	0.247413567748264
Ednrb	grey	grey	-0.0002755885482597	-0.0403322193607977	-0.0130111340901064	-0.0172830492051888	0.0711791213767422	-0.0417859249658305	-0.0295118276821197
Mfap5	M1	blue	-0.253405504609487	-0.118931086877866	0.132524117833886	0.224655209906245	0.125228939846564	-0.00393865151937107	0.132481299726448
Aqp5	M2	yellow	-0.151960445157158	-0.199254604693599	0.0513368655388316	0.0934159492171384	0.124527898441532	-0.089030637983338	-0.0116780900336611
Cgnl1	M1	blue	0.170939497069131	0.114898746774035	-0.0536234138929	-0.119014070939621	-0.228591031341015	0.0478040194101333	-0.0529821287379701
Marcksl1	M5	green	0.0898081383040041	0.0434307729054822	-0.0393624356640026	-0.0862684105143919	-0.0833185628960049	0.167477171583423	0.0889075417095954
Sparcl1	M3	turquoise	-0.31850092659271	-0.339633320004004	-0.13733281512256	0.321678118339209	0.346490273760877	0.10844868108562	0.167634505348227
Gadd45g	M5	green	-0.109967007489123	-0.0471812815960627	-0.130731474668059	0.210545494475987	0.0686056445818646	0.380251911801089	0.274058251559652
Pcsk6	grey	grey	0.208125741150176	0.20990126332576	0.176943580392617	-0.367944894241894	-0.28452618874975	-0.174666644819812	-0.188861949874105
Noct	M5	green	0.150189935766494	0.0966006799509825	-0.19179290126661	-0.0368802278065216	-0.107836239902462	0.389710566065243	0.20949968842692
Bmp2	M1	blue	0.0284328690324883	0.0645455731681708	0.0160717912250345	0.0143656069347791	-0.0612835102510649	0.0925985037656247	0.0948101688457378
Ier3	M5	green	-0.0232459051776885	-0.126947589403459	-0.440195529491426	0.270497053791772	0.108399362967963	0.695766770125219	0.415259799730682
Postn	M2	yellow	0.0909381821978845	0.0626041017733152	0.0737319659117841	-0.187203635350941	-0.128759726799189	-0.0245142109194333	-0.0607241372988786
Mir22hg	grey	grey	0.00291226458074059	-0.0438871163944952	-0.0857267555424528	0.0533146783324413	-0.0292855798634808	0.18286299662188	0.158245433112896
Cdkn1a	M3	turquoise	0.000612271330087898	-0.115613189587048	-0.437900620933742	0.136764372993489	0.088004062308906	0.591353780500656	0.31820209274031
Gm43936	M5	green	0.106109303759215	0.0449634451890208	-0.174578921105305	-0.053361248472899	-0.0346456902803891	0.11622968807973	-0.0289484479909041
Smoc1	M4	brown	0.137189461870582	0.13017126627428	-0.0305476956581449	-0.113042773969084	-0.182774615535571	-0.0182198345700263	-0.0686027155667148
Il6	M5	green	-0.0593520157697735	0.0299248359831542	0.0103830896373565	0.105926901523147	0.0312995927550878	0.121924357415465	0.15086099969378
Pla2g7	M4	brown	0.200786623215686	0.192429874422187	0.0886411328554359	-0.225141309849947	-0.232450651916853	-0.0404140532890559	-0.095573720399643
Vegfc	M3	turquoise	0.229146285545961	0.0899885981918527	-0.400411166234914	-0.0667720835369733	-0.0835640498341205	0.220799550994856	-0.0154895126557939
Phkg1	grey	grey	-0.0779215599218714	-0.0462924356014176	0.0229585798288703	0.0285291955226735	0.0654569221626057	-0.0374083047533872	0.0057336622468601
Emcn	M3	turquoise	0.339089863509716	0.212253801975205	-0.268401874290481	-0.245531823919921	-0.21681644395103	0.0566480178886868	-0.190206106287715
Clca3a1	M3	turquoise	0.165419699488651	0.171823466435395	0.0742291040713645	-0.225224451342247	-0.20902430776621	-0.0188411707483358	-0.0868708115014605
Ackr3	M3	turquoise	0.275002384490908	0.122268961037335	-0.388047337432585	-0.125235647361383	-0.168860876747055	0.294072599665082	0.025021733949436
Phlda1	M6	red	-0.221242198260516	-0.115564116909109	-0.012609166480864	0.259133673052709	0.232197479717719	0.227368418232294	0.34418566397322
Srgn	M3	turquoise	0.337658677371347	0.104421253546112	-0.650785975465416	-0.0834960404212087	-0.190383767376955	0.349140448408411	-0.0394879614093132
C430049B03Rik	M3	turquoise	0.0239155374278816	0.0183649932736524	-0.0599647218603491	-0.00969383963893137	-0.000166807994269458	-0.0164817577208794	-0.0276094180294803
Gja1	M4	brown	0.236166366580039	0.234269567885205	0.205044843192699	-0.404253881861472	-0.307536798950596	-0.083932614517749	-0.125928512507394
Cx3cr1	M3	turquoise	-0.0435311440987217	-0.0421612454656455	-0.0306794684558977	0.0471933031295338	0.0461002622530324	0.0272170292447776	-0.00188608433743366
Nes	M3	turquoise	-0.0693969323307716	-0.226463650533271	-0.310924192382935	0.135230702929408	0.208689657321209	0.253962828930727	0.132524131504509
Gpx3	M1	blue	-0.790247663941799	-0.614259966155139	0.167506934229116	0.646012499131823	0.633514360375978	-0.0196378601999865	0.295161629666018
Fn1	M1	blue	-0.571110811146695	-0.390229893065993	0.128001476229162	0.41886185306452	0.465204801640688	-0.0635228415301209	0.168757878680628
Cox4i2	M1	blue	-0.107586310199026	-0.208609913812569	-0.00710270525906261	0.0482010497692314	0.121743998457119	-0.077566607486334	-0.0214619578631393
Gm8251	M4	brown	-0.124534667420202	-0.00265576100749852	0.106225001476527	0.179060792413967	0.0950154104334072	0.0878892943244329	0.189809065870877
Mrc1	M4	brown	0.187385775789846	0.175775024028407	0.20123591609673	-0.337228582500346	-0.230981866978404	-0.091856921611631	-0.0913246184508915
Gjc2	M3	turquoise	0.0809899768243862	0.0835635337797661	0.107049508061047	-0.185624354746892	-0.125315391123683	-0.104640532618157	-0.101978068427109
Pdgfa	M2	yellow	0.0419845139920408	0.00452886232561784	-0.0393919319879975	-0.0125213792665759	-0.0576436235509108	0.119782556518555	0.105267868938306
Ptgs2os	M3	turquoise	0.106106818923028	0.0752267638880762	-0.112016409308906	-0.0413179454881296	-0.0885027877168804	0.117935590954431	0.0496693970963893
Rcan1	M6	red	0.191336711895625	0.139059085672037	-0.100139663904627	-0.065025702135875	-0.173676549518774	0.346032459425216	0.222612990112066
Npnt	M1	blue	-0.836006899847922	-0.59893427044347	0.212829606892345	0.683079821618796	0.677036191197077	-0.000726624054675106	0.358077928610052
AU021092	M3	turquoise	0.323907718941113	0.243147235536329	-0.240256308525798	-0.171706033136213	-0.313917987282	0.104690269554801	-0.0721583097019732
Pcolce2	M1	blue	-0.779431190268456	-0.631648235903056	0.130390849159507	0.658116037497529	0.629074704037925	0.0364635478699973	0.337643653642804
Enho	M3	turquoise	0.09205127598486	0.0486802692547571	0.0262312252343479	-0.181473566231302	-0.0648959316382633	-0.116647706967963	-0.149689656230388
Pim1	M4	brown	-0.0806119729253191	-0.00354016521767939	-0.0149009515270167	0.264715981796259	0.0603867688213641	0.423550387753464	0.46980888876861
Hcar2	grey	grey	-0.0680992582212781	-0.0679439604724225	0.018260730818317	0.105685279411946	0.0454826365466351	0.054374357750639	0.0903557759281048
Neat1	M6	red	-0.170617629762092	-0.012479441855268	-0.139321316140323	0.290304360157958	0.195196789841015	0.361477886232633	0.455259637861512
Hist1h4i	M1	blue	-0.0733170571540865	-0.117576681235681	0.0313190873880164	0.0462818097406639	0.0713803997679002	-0.0737318043101086	-0.0253118299859939
Frat2	M4	brown	0.0151095661970481	0.0686411648746437	-0.0427164069560229	0.07146782565292	-0.0189357679075354	0.180398504866122	0.152785138764502
3222401L13Rik	M3	turquoise	0.0174907725858763	-0.0306005656701111	-0.0929354997396674	-0.000619475802593132	0.000128768889932408	0.063941937772218	0.0289342811605536
Rnd1	M3	turquoise	0.218553927935783	0.18712167138965	-0.138457760667092	-0.0872192102891459	-0.199730940465359	0.282844008118082	0.135031491851289
Net1	M1	blue	0.17462603919622	0.132110247558871	-0.18192602370549	-0.0782474289884297	-0.118035604289194	0.0377961783190663	-0.0565949886861458
Emp2	M2	yellow	-0.501261707361325	-0.569248060502692	0.077950598233712	0.390559260164451	0.338478065116481	-0.0143764564870448	0.171412015221354
Tnfaip2	M1	blue	0.0358048632909234	0.085024638903762	0.0314564460572803	0.0396983767958933	-0.140580655628409	0.150612896186718	0.175153474031414
Adgrg1	M3	turquoise	0.07539461388507	-0.00874870210386652	-0.103105618289904	-0.0438980113720765	-0.0519341679496405	0.0498657142797377	-0.00444767656015668
Vegfd	M1	blue	-0.617574276173822	-0.443698470545448	0.130880044345192	0.504507011038494	0.515396828736882	-0.0384511511392452	0.256655714011946
Cks2	M4	brown	0.00181905256514621	-0.0940889229672462	-0.0406249166258567	0.023658885510795	-0.00806713181715208	0.100071916722962	0.0861992995867866
Sema3c	M3	turquoise	-0.167756872288694	-0.301110524840837	-0.439661141471751	0.21605462234903	0.341505461080833	0.175919415865275	0.0782397163653616
Lyz1	M2	yellow	-0.0234688917827324	-0.0340845871082938	-0.018421716046783	0.0118406657394827	0.0357796792929109	-0.0219330290288475	-0.0184865034339433
Dtx1	M4	brown	0.190626682913811	0.201648426067184	0.178184623592178	-0.341303815049946	-0.265538262913123	-0.17595021766308	-0.174033569550196
Mmrn2	M3	turquoise	0.362800269620355	0.282126875591847	-0.191755614993543	-0.246023836189814	-0.400136419960186	0.174059604234787	-0.0425330285756548
Gpm6a	M2	yellow	0.255528515576162	0.259300285576861	0.22644457994457	-0.412375123299186	-0.338216293333171	-0.130318504156208	-0.204222230436783
Ogn	M1	blue	-0.843109464584061	-0.5701634303437	0.22915352094775	0.698928687898455	0.690733735954934	-0.0432933263855399	0.352503515131734
Hsd11b1	M1	blue	-0.845312596840745	-0.61165155143356	0.203722290887758	0.684845927282184	0.684718260943983	-0.0461939558821563	0.327933042229493
Itga8	M1	blue	-0.725720780444385	-0.464004748268896	0.230245083298849	0.577230314307538	0.598791065615086	-0.0839881036423839	0.289379768661458
C3	M1	blue	-0.259157006578092	-0.138884971290599	0.156068512608478	0.190404448087463	0.170025920010772	-0.0498861742638441	0.108653213836765
Angptl4	M1	blue	-0.46970681761411	-0.260747959075858	0.194991560020999	0.355118778334107	0.367266860099713	-0.0762756162366921	0.166079413147575
Gm26802	grey	grey	-0.229554586935768	-0.0709081136438134	0.0721314210119998	0.269107857083091	0.198006360815781	0.0736333660605349	0.276304805266785
Fos	M4	brown	-0.327352474384282	-0.0974804319539355	0.0941925094267364	0.458854744805892	0.213394866118346	0.45910302212286	0.610743140275472
Acox3	grey	grey	-0.137088075731433	-0.0590395467983301	0.0555412130432418	0.108038389887149	0.123743150849939	0.0392108577494993	0.109103834238999
H2-Ab1	M3	turquoise	0.0484489444475036	-0.116673534438797	-0.453118738854722	0.044333211903775	0.0944028308695496	0.174728798460974	-0.0448647513374749
Fndc1	grey	grey	0.156075272396816	0.164784750176223	0.0929134107636209	-0.258999061798796	-0.216588482967104	-0.0967680554588357	-0.134544344107404
Otud1	M4	brown	-0.167183365530532	-0.00113231438049426	0.0600239824728856	0.146395100933053	0.13937028442086	0.0917963025193403	0.207102668538105
Eps8l2	M3	turquoise	0.0818909993690967	0.0719913950499194	-0.0394321661756108	-0.0305766188297669	-0.11520398408612	0.120993147778298	0.0552107266978491
Hmox1	M6	red	0.0720689029720233	0.0662560490866424	-0.0418606415874205	-0.010507303221205	-0.0610941839827652	0.191392331732604	0.0984292195954565
Prx	M3	turquoise	-0.157742764259279	-0.266340620050005	-0.150509731126788	0.150416079490655	0.273392430523011	0.0278932563645418	0.0378758333114902
Rarres2	M1	blue	-0.771259266325557	-0.543383186968961	0.160990863900556	0.647043693337418	0.659139927454923	-0.0129453230904606	0.32389264580563
Ripk4	M3	turquoise	0.00922787914233413	-0.0276141612727337	-0.0504083977670149	0.00352349610800043	-0.0152478819699222	0.0642637949574712	0.0259933941047741
Pdlim3	grey	grey	0.252375456954284	0.194084207108121	-0.0747031883025293	-0.19260237254737	-0.310619327516389	0.0259723836658005	-0.105286386745863
Slc7a14	grey	grey	-0.00594569773183523	0.0254732166537845	-0.0636819745390544	-0.0223007376637151	0.0106983108899576	0.00524514896646828	-0.0304853210697103
Des	M1	blue	-0.354204380253179	-0.300609736798037	0.0579489787555895	0.311068560950827	0.314359439930872	-0.0113110746224539	0.17487812555959
Trib1	M6	red	0.165351901210839	0.174241590070061	-0.025644133885857	-0.111695882196262	-0.172229964311751	0.352766180653137	0.277055340183487
Ptprj	M6	red	0.24182841318771	0.186845611865554	-0.169948352371515	-0.13201901380233	-0.24163036810367	0.0458814720803578	-0.0941786185819283
Gprc5a	M3	turquoise	0.10989132266593	0.0499416594599814	-0.110791472092649	-0.00797490531476795	-0.132302128808937	0.158373850516349	0.0926764586126784
Itih5	M4	brown	0.0537928473843589	0.133599344992322	0.223829664339829	-0.211319386005744	-0.13367295772645	-0.130841367009923	-0.0721859234241013
Tchh	grey	grey	-0.112622853408539	-0.0988071842426015	0.0104933888830299	0.144821847437302	0.121150639739436	0.0327364360422054	0.0947564822233355
Lmo2	M3	turquoise	0.265364741724199	0.199800495802264	-0.12554334863293	-0.219577242349936	-0.294374988298349	-0.00635814309850414	-0.132088673043139
Ly6a	M3	turquoise	0.2004425480878	-0.0363012969646839	-0.659585407283912	0.0137377151324185	-0.0438721411697564	0.296182473832659	-0.0590513450607697
Gp9	grey	grey	-0.0355469421685029	-0.108729470542108	-0.0406908329913099	0.0232980163551196	0.0501340032328556	0.00166829535039882	-0.0222804177810424
Cpm	M4	brown	-0.263353799329202	-0.142689667191429	0.0817193086884127	0.264719927987679	0.228670327370075	0.0538391548755286	0.18442577516148
Bhlhe40	M5	green	0.27880677767032	0.199653825533765	-0.22726418250169	-0.116784927442658	-0.249260338510913	0.399346284289346	0.179357983200734
Apod	grey	grey	-0.00794710927048906	0.0365756849128972	0.0508950465084136	-0.011132511471446	-0.00119799963051368	0.0314635901913821	0.0535360684795191
Rgcc	M1	blue	-0.350998237763141	-0.299391999438483	0.0739014157565419	0.332600213861217	0.28574903230789	0.0586773076581098	0.231656452941091
Lox	M1	blue	-0.433888119937434	-0.241400629276969	0.165930688922431	0.399886940889809	0.300658834198258	0.00382714348177362	0.268056816312378
Scn7a	M3	turquoise	-0.33800063730275	-0.353378690723353	-0.239847663484201	0.324473787201932	0.443962429170942	0.142146637957191	0.171422529249458
Lum	M1	blue	0.0404966409203303	0.0201336458767309	0.0092389896126161	-0.0221609681558975	-0.0312883075582076	0.0416371241421218	0.00887304997437366
Tnfrsf12a	M5	green	0.0349999128572734	0.0173122087069083	-0.142245829984427	0.0890949654077883	-0.0375368714050367	0.356490149784925	0.259085503739559
Cd200	M3	turquoise	0.391468883264726	0.270192114057356	-0.329740373098873	-0.252995909318984	-0.2971234001735	0.0814092077743355	-0.17942651742995
Irgm1	M3	turquoise	-0.0214050510803716	-0.0763567579773802	-0.0908706002493777	0.0556015104030356	0.0536878395965842	0.129520141612163	0.0583370426736648
Sgk1	M5	green	0.0727765887376556	0.0437703544334523	-0.159523099183533	0.0500334826980268	-0.107494768560025	0.421297643768967	0.25734710811321
Irs2	M4	brown	-0.335548795125918	-0.200704543463829	0.150707477309208	0.357507110511981	0.264425092871154	0.0540857154577688	0.263470596179866
Fxyd5	M3	turquoise	0.47541141957251	0.326556449743234	-0.36295891121926	-0.301030523945008	-0.408641641075829	0.193667608199685	-0.124878550500786
Hspb8	M1	blue	-0.181124111949266	-0.0986861351883638	0.0917468310903647	0.144612447052918	0.134812269789699	0.00252713608119519	0.106802407450053
Ccl7	M4	brown	-0.0824341399073667	0.00459552755040769	0.091432198861186	0.102695958279341	0.032960278110974	0.0645253653245215	0.113247644456932
Fbln5	M1	blue	0.134611866743923	0.192262566546919	0.0274872060900949	-0.164267944590206	-0.206986148536139	-0.0782838124413612	-0.111794938376211
Gpihbp1	M3	turquoise	-0.139109796783633	-0.258939356662132	-0.371450112942935	0.149719855453807	0.205897663070349	0.212167496233259	0.0548293520671754
Pdgfra	M1	blue	-0.692485535655382	-0.409230017782652	0.209720968501308	0.559708498683537	0.571710863579454	-0.0829912963534768	0.281764119885307
Lpl	M3	turquoise	-0.123009090848196	-0.153160864966795	-0.24140538077121	0.129332729868783	0.196745618388488	0.097955577591071	0.0326688747023347
Fibin	M1	blue	-0.516790184030385	-0.275653781707099	0.142505842871185	0.418513685123434	0.450955494686809	-0.038574474177314	0.253642801808243
Npr3	M3	turquoise	-0.0615719642148755	-0.159304299699541	-0.378003518761218	0.135069768313123	0.222821186067285	0.153403859605077	0.0487097158124415
Sox11	grey	grey	0.00964504724663576	-0.00121948037100747	-0.084375739626784	0.0364430795610434	0.0575483252133337	0.065854490138323	0.0241456997246029
2900060B14Rik	M3	turquoise	-0.0328485601488849	0.0101880220678757	-0.0120805650088767	-0.0123472088170832	0.0141294479671	0.00265798781045223	-0.0113176270340869
Tppp3	M1	blue	-0.228180994434873	-0.200736364280379	0.109632268166803	0.133500897033652	0.17006333425631	-0.0673285760528077	0.0413418860966819
A730036I17Rik	grey	grey	0.0426643901253877	0.0267309480171503	-0.0632381966477639	-0.0148755323124911	-0.0436187860897136	0.0389347476648108	0.0319971984414393
Sorbs2	M2	yellow	0.248393196336466	0.238849483480407	-0.0331587835920039	-0.231692253349688	-0.274986831539029	0.0200143584430431	-0.0811067593693735
Cyp4b1	M3	turquoise	-0.0740616953591951	-0.160410019906749	-0.114110822409216	-0.00849431754027275	0.121954619933138	-0.0715124186642364	-0.0821335612152349
Cdo1	M1	blue	-0.719120174501652	-0.601579039578367	0.124855777827423	0.630129551349512	0.602349138183337	0.019716453462807	0.301204352231263
Rtkn2	M2	yellow	-0.108401476348273	-0.197377902904092	0.0113103178151195	0.0584364542579555	0.117264103983307	-0.0175211026888668	0.00278105475918967
Arl4c	M5	green	0.0141497938899029	-0.051754719193188	-0.0262020389970777	0.0301325932091035	-0.0173127285322029	0.129781466120702	0.113600373219845
Ly6c1	M3	turquoise	0.0422119901642463	-0.180052649198598	-0.543598647582526	0.117110604008518	0.0766524619114376	0.279308856935556	0.0401177305434434
Ptprr	M3	turquoise	0.211918497409496	0.163423664060972	-0.146534908445204	-0.0980972339556244	-0.2478195980691	0.130136404986443	-0.00586336064873018
Timp3	M4	brown	-0.0239771048167992	0.0723651558021955	0.0610694059483534	-0.0635731891858302	-0.0231515488824205	0.132103709310784	0.143293813726472
Plk2	M5	green	-0.0566309957507998	-0.0601331059266382	-0.189577549827693	0.133292547052151	0.119251869587623	0.379833799229167	0.244018197639168
Stab1	grey	grey	0.30221922624139	0.269460935631914	0.120081315396536	-0.401539009605445	-0.365258700071397	-0.112379584831151	-0.201484608582159
Fmo2	M1	blue	-0.827992950538888	-0.582649803058778	0.204556655416632	0.702870586647538	0.626203833504603	0.00759522390211613	0.384285295397259
Map3k8	M5	green	0.0945249257281048	0.0174764599960901	-0.187725542348544	0.00141285525036725	-0.0498718627584426	0.28889683931701	0.12490189525117
Plvap	M3	turquoise	0.129273526209413	-0.0557252561292853	-0.632234214963259	0.0390056720623001	0.0294034428922889	0.379591430410993	0.0410115354284967
Gsta3	M1	blue	-0.588169627344092	-0.443622620802006	0.149921735901056	0.468447958800448	0.49207497929809	-0.0623106513555618	0.236658088373546
Lilrb4a	M3	turquoise	0.0335889795405588	-0.0603928798060576	-0.102477425125952	-0.000984035827013795	-0.0176826843644254	0.0647679536743179	0.0188303442981401
Cdkn2a	grey	grey	-0.0868501729313944	-0.0773111645749548	-0.00356709403908146	0.0880489379054544	0.155882739413528	-0.0843596368078764	-0.0263843828088464
Ddit4	M3	turquoise	0.301624273736986	0.238680769458986	-0.147683133413401	-0.192744206319066	-0.308460320123222	0.00925042895967954	-0.140690345343736
Gm19409	grey	grey	-0.043797687976298	0.0251736631458766	-0.0146320965447647	0.0505955137982296	0.0528494018945412	0.0378083519033595	0.0599079647450392
Fosb	M6	red	-0.188419009982164	-0.00662267769805458	-0.000448142748659169	0.343893559742818	0.132229625867807	0.563668005706931	0.682152389563822
Stmn2	M3	turquoise	0.212979563264067	0.0826279197482823	-0.310547154271195	-0.108934981123925	-0.171473172525839	0.134975804447194	-0.0686018311941458
Sema3d	M3	turquoise	0.241716166802033	0.211619295644687	0.193350863173174	-0.405363567788847	-0.303014518189932	-0.162649235068354	-0.170252369755416
Gem	M5	green	0.0771249317746867	0.0527447191396073	-0.206544896817965	0.0909508884886844	-0.00856755341626254	0.418500541454176	0.261427125636052
Zfp36	M5	green	-0.103288721303749	-0.0397963752066384	-0.181620258596056	0.290239164892772	0.100883138117567	0.625003005941387	0.524078245821361
Stk11ip	M1	blue	0.0130772781196125	-0.0110366558752317	-0.0451898088647747	0.0049121374158878	0.0196861930330808	-0.00551516081670171	-0.0154662417465339
Sat1	M5	green	0.0269472299695369	-0.00264224431314233	-0.266735128990046	0.162718257501004	-0.00766140162833391	0.450229084008192	0.260468824590752
Emp1	M3	turquoise	0.241810720043573	0.179084798115229	-0.319634427700944	-0.0883515655348463	-0.19584103070144	0.433022732747017	0.204646725133548
Unc5b	M3	turquoise	0.20659962772016	0.16236491580383	0.138586543877025	-0.345091012442209	-0.244849929112455	-0.0984733826512255	-0.149985948087971
Gadd45b	M6	red	-0.324140502774169	-0.201567297467919	-0.0364502105162027	0.469888372964576	0.2670026808457	0.529711727439122	0.65403780710249
Nrp2	M1	blue	0.0620223128812854	0.0921584640308952	0.192005643769637	-0.22224857115345	-0.126064024361654	-0.08901445235908	-0.0448424360440323
Cthrc1	M3	turquoise	0.296160198793183	0.194314971235317	-0.295793473554067	-0.137540402206982	-0.21691143738669	0.157328760284198	-0.0276086960333059
Tiparp	M5	green	0.00559048779514894	0.0099775598787975	-0.145278508577882	0.105931937414506	0.033572880572268	0.462788115856203	0.352012614249174
Hba-a1	M4	brown	-0.0550139285440088	-0.0118056115641522	0.0611714949775673	0.0946126022687205	0.044005024741016	-0.00139487449084342	0.0546523651314664
Mafb	M5	green	-0.0665181691368363	-0.0330312733288391	-0.117427285391248	0.128752881605034	0.134748827571053	0.239663192938885	0.220240600060258
Mycn	M5	green	-0.0511150214720733	-0.0865833016122046	-0.087763931742939	0.0704505594111109	0.0589776730193275	0.115698041899395	0.0715800742271779
Osgin1	M1	blue	0.0275041902637236	0.0738168340433013	-0.00431336311573	0.0508985044414289	-0.0465772995793452	0.155793304199211	0.121970370036497
Ackr1	M2	yellow	0.112809013704199	0.0840586094961572	-0.131549095240307	-0.0445179372322154	-0.07834400953414	0.0975034769330207	0.0327225077627412
Gm16287	M3	turquoise	-0.0957684237514051	-0.115772124475029	-0.0161003962212555	0.106974901073605	0.0931036031327734	0.0805192472972489	0.0760551698169052
Sema3g	M3	turquoise	0.0515026411663044	-0.0554143461088993	-0.3292801383396	0.045041840240596	0.0130615535740365	0.171295614888272	0.0446750938875106
Tinagl1	M3	turquoise	0.344146064237725	0.169781107095406	-0.52924668215399	-0.0902474064880608	-0.215683845683276	0.320854007596608	-0.00150979808842577
Pdzd2	M1	blue	-0.148933945545149	-0.175327332765025	-0.117274906137389	0.149301812785827	0.189086258520477	0.0287025756026433	0.0499105060067412
Nfkbiz	M5	green	-0.104203909959219	-0.000239672886897432	-0.154474886816019	0.281968602550962	0.123937596299938	0.55962638541386	0.499117922495365
Fbln7	M1	blue	-0.0358954944467917	0.0266722005552427	0.0589873584162212	0.000124018037823685	-0.00678398068308296	-0.0217578913883818	0.00899120454168097
Grrp1	M3	turquoise	0.102401969810518	0.0044392954017603	-0.392377696417192	0.00272492542129679	0.0351196922755918	0.218193929271384	0.00106982772262622
Adamts1	M5	green	-0.147841197107104	-0.103216882490909	-0.168218178174954	0.273821745146376	0.110321087012015	0.401271289525605	0.375515503166522
Cish	M3	turquoise	-0.0185761958496441	-0.112631125430112	-0.300581922959024	0.0872156516498463	0.107000382622602	0.367156413874086	0.193452951423355
Cdh11	M1	blue	-0.574205913255259	-0.316909286966733	0.187958794387051	0.435922367068075	0.458101041617259	-0.0982864111288847	0.219871332491874
Ebf1	M2	yellow	0.141287314921026	0.129937068189182	0.0667793787802516	-0.179356669603923	-0.151228606829578	-0.0108581504295165	-0.0415868188435377
Krt18	M2	yellow	0.11304009088015	0.0658874938950393	-0.00486247459284047	-0.0380946032471205	-0.172232979563024	0.0145770652967801	-0.0460740150842971
Sod3	M1	blue	-0.752861415858073	-0.490174805620738	0.191946061803906	0.63459252211847	0.589231080612523	-0.0201296597766929	0.339030294978672
Plxdc2	M1	blue	-0.777485856499022	-0.514165589104596	0.194630445569395	0.6729352941435	0.639416326847149	0.0305439566081943	0.40208054436115
Dok7	M3	turquoise	0.0506395231220436	0.00653558679948461	-0.0666670802050359	-0.0171427505510366	-0.0526067808931931	0.0935974622645439	0.0625235196364957
Rasd1	M6	red	0.0422348212942973	0.0928518794419077	-0.00815568681440253	0.0435137281100138	-0.0523799063540951	0.121751420998693	0.131570126550804
Selenbp1	M1	blue	-0.749579046108836	-0.555852126442579	0.141845670790379	0.634881098193202	0.611440947792732	-0.0204673818832607	0.293431621832868
Dpep1	M1	blue	-0.654469200403695	-0.405674535215101	0.207188615343955	0.533034633378462	0.492715062891083	-0.0502127950611159	0.287991711998066
Mapk6	M6	red	0.038424083497159	0.0302626792852077	-0.145426502647784	0.0699117217777045	-0.0173543259939144	0.300008731692959	0.271223578990129
Amer1	M4	brown	-0.0447875648530812	-0.00980447601613632	-0.0400665963381036	0.0926431397188675	0.0924433693235435	0.116090622395939	0.106427167844146
Lgals3	M2	yellow	-0.158135699456513	-0.195821234788238	0.029899456480736	0.142718480359018	0.10216712519992	0.0144456409896931	0.0543718210408586
Adamtsl1	grey	grey	0.193904474200615	0.216153678322568	0.167618925599512	-0.333294591631648	-0.267322696547749	-0.128170350982897	-0.151768483181255
Egr2	grey	grey	-0.0500341075984507	0.0324306124832594	0.056697326436791	0.0539528927243792	0.0236374927889084	0.0906422523327741	0.14448107798615
H19	M4	brown	0.04360892323459	0.0556118771129823	0.044593936284408	-0.0667159287616285	-0.049617816189452	0.028001021682558	0.0259928883597752
Ces1d	M1	blue	-0.649770613785492	-0.517838956601083	0.155572407251216	0.495536087632332	0.538242346935249	-0.0875899472466647	0.188722615942159
Aldh1a1	M1	blue	-0.76329469770886	-0.57025996523245	0.15440150826414	0.64541614440193	0.630684331016023	-0.00318109578620028	0.324720648968284
Adamts4	grey	grey	0.0141878152549064	0.00790356066950033	-0.0167760357083544	0.0111963822461575	-0.0470066821858056	0.102840432864237	0.0827546050549242
Frrs1	grey	grey	0.093919149090509	0.0606899764043776	-0.0560178770841584	-0.0430420605509642	-0.115026364595244	0.066414225102052	-0.0268254389744513
Olfm2	M3	turquoise	0.0808421748588807	0.086258885368814	-0.0824097355121893	-0.0362585502947982	-0.0448339919326069	0.025758346269904	-0.020069401758134
Pid1	M1	blue	-0.64449612429956	-0.351745351973051	0.201297237858086	0.536177113471642	0.539618419660274	-0.0616952233672563	0.280369599450767
Fstl1	M1	blue	0.253414959092818	0.220244595554788	-0.168876289190332	-0.132093931875742	-0.299999335526476	0.0966067823960658	-0.0525475166024842
Scube2	M1	blue	-0.607972514624123	-0.374529321263883	0.185890291201306	0.474249983834401	0.48823671300474	-0.054412574406713	0.251804582983939
Akap5	M2	yellow	-0.247496634657657	-0.44667210060919	-0.0215974399993662	0.175912250474878	0.251905524880123	-0.0589223036614335	0.0269392191124348
Scn3b	M3	turquoise	-0.0425857871122399	-0.0873177750281552	-0.205095054732714	0.041261162191111	0.115719025810717	0.0704493164062091	0.0092652728762991
Klf6	M5	green	-0.111100779209323	-0.03999770257824	-0.0127570950731002	0.156323244149677	0.0648075545327455	0.378670451740995	0.353592718370111
Meg3	grey	grey	-0.00153133607740587	-0.0117503119067702	0.00666748376882632	0.0230500151698746	-0.0185399093399675	0.0358258021703372	0.0412451904060413
Col1a2	M1	blue	-0.650941481733909	-0.391948440325556	0.222032866807911	0.525351802650791	0.51054229196201	-0.0510853083404308	0.280330598394186
Cep162	grey	grey	-0.00666272647639853	-0.0623770221517447	-0.0454448033999868	-0.00284401458000179	0.0314295615727862	-0.00874591152775579	-0.016359784471416
Hk2	M4	brown	-0.30470449381604	-0.114590769643574	0.156603628548894	0.328308444534129	0.227615558188693	0.101089463826008	0.316278981718896
Klf2	M5	green	0.304000739730695	0.22619783847039	-0.114507251421516	-0.213953071951757	-0.360814330306954	0.259132258678826	0.0464808650893256
Dnhd1	M1	blue	-0.0589224595836909	-0.0485885698229028	0.0225979685982578	0.066657877492137	0.0797236686497923	0.0129761737327303	0.0650799213072001
6720489N17Rik	M4	brown	-0.028637948862782	0.0039650149555052	0.0579858474999557	-0.00227932768284389	-0.015980262018323	0.00117627344828815	-0.00960035196267553
Sh3bgr	M2	yellow	-0.0869515307162464	-0.097219262982801	0.0199981299108842	0.0473139387924319	0.0641078431001489	-0.0445280442666401	0.00889347720040287
Tent5a	M6	red	-0.185045209902088	-0.0603819434419544	0.0697513703565767	0.212706067598928	0.119888224683044	0.0766445121431165	0.254269261517035
Cited2	M6	red	-0.487776765306223	-0.296957334972818	0.110606696978191	0.485371337239255	0.381858268578093	0.166614152104135	0.460234209090699
Ahnak2	M1	blue	0.259160666192157	0.219079501579023	0.0418495421972007	-0.32108712828915	-0.304534951969185	-0.0730825730112847	-0.151873129704789
Ccnd1	M2	yellow	0.0249737665835606	-0.130981322997607	-0.136941076880924	-0.0884234554321545	0.0246978174982867	-0.0321369662044981	-0.0953193508976458
Sec14l3	M2	yellow	-0.235501447854144	-0.432536955454783	0.0283947452745313	0.157586533375587	0.204556993512119	-0.103119629386496	-0.00446167543253351
Pmepa1	M1	blue	-0.231756140651048	-0.113881323307976	0.0336273180054622	0.224252972375126	0.138105085609714	0.0149622891134452	0.110051842454257
Spata33	M1	blue	-0.100461738770955	-0.0277042435313726	0.0939027883328892	0.0729298982525467	0.0622085664144471	-0.0229144444713043	0.0759426651718569
Car14	M3	turquoise	0.011681097046546	-0.0601612354759152	-0.28697689892029	0.0401954910896866	0.0992527550607567	0.107221939271366	-0.0157041007289203
Htr2b	M2	yellow	0.197187760943946	0.199803035834746	0.0342597406063548	-0.264313394044582	-0.22615430511671	-0.0795068105181014	-0.146866339845341
Apln	grey	grey	-0.113830639843537	-0.145005866932383	-0.0163196331007382	0.0734624515072056	0.166017541476441	-0.0701416759316243	-0.032878988861718
Maff	M6	red	0.0339325749797504	0.0522972891030717	-0.0784716846081771	0.105463300395747	-0.0335084991101356	0.453963904555602	0.404483195409589
Cd14	M4	brown	0.0687647012607744	0.0138424846405049	-0.0223094595149165	-0.0315186110014848	-0.06583949525711	0.118791369182675	0.0687946685975221
Mettl7a1	M1	blue	-0.802876751120328	-0.624382340392291	0.176674533359169	0.629462675126589	0.633395351721172	-0.0511294075408073	0.320624925097034
Bcr	M2	yellow	0.277995873952568	0.203943648909055	-0.0094789294317017	-0.278551766105254	-0.266974300293614	0.116284808117794	-0.0365074114904883
Aqp1	M3	turquoise	0.346130781635212	0.0858132768120546	-0.528332087689453	-0.253997658763989	-0.211650656142705	0.236135462255201	-0.131112668462628
Alox5ap	M3	turquoise	0.0344180170292828	-0.0279512891614933	-0.0560356170245421	-5.1089129043606e-05	-0.0406019210111804	0.0424231661751942	0.0229659867864893
Ptp4a3	grey	grey	-0.11613074196819	-0.230263885748666	-0.0184610719481088	0.0496378709308244	0.191433427756117	-0.0734839577833497	-0.0540936895528318
Kitl	grey	grey	-0.197912773706529	-0.220994917301696	-0.137646645499319	0.231034985133798	0.282706411831549	0.12915148171538	0.162335267805586
Slc6a6	M3	turquoise	-0.350182131212668	-0.245372123137851	-0.118802849668037	0.35020203295836	0.350134309753661	0.131708381786087	0.216167809386257
Sdc4	M4	brown	-0.308222994572585	-0.169606108731168	0.0397244566447452	0.41407832503417	0.254785618837158	0.2017307349339	0.342635249918288
Id2	M3	turquoise	0.211571178403982	0.124949912899817	-0.237876842961363	-0.0711973888492238	-0.185522097825767	0.18704822662789	0.00269940358900891
Amigo2	M6	red	0.264388834723024	0.173253192137183	-0.24641012640821	-0.130737844951806	-0.211626462464299	0.0712548188627858	-0.0977678816151632
Glp1r	M3	turquoise	-0.116925385347784	-0.172994943897855	-0.325555981848085	0.165231897413939	0.242034126485046	0.155953710255423	0.0630559770892254
Serping1	M1	blue	-0.717710070672235	-0.515211176840106	0.163816805933448	0.598723552336661	0.548369630165462	0.0209008383695633	0.311383513106457
Sdc1	grey	grey	0.166967279337062	0.15295410475025	0.0658108054658884	-0.172968387028446	-0.256111038549244	-0.0255317574160295	-0.0783145525884681
Dlg4	grey	grey	-0.0695701489805686	-0.0311260553675301	0.0176417263653365	0.0901329549690641	0.0373657617062625	0.0651531714278412	0.124003014939786
Slc39a8	M2	yellow	-0.0993698587916461	-0.177159016299601	0.062030828517145	0.0688918175529111	0.0889438375898239	-0.02759578577491	0.0442700056982924
Proser2	M1	blue	0.188172729846199	0.120597441468702	-0.157359419721972	-0.124740988053367	-0.145453143385659	0.0023525848284895	-0.0901719467585428
Gyg	M1	blue	-0.596302676721508	-0.415513800658281	0.156710077645934	0.48214041628688	0.471501903316682	-0.0305977646534613	0.268760313600849
Hist1h1d	M1	blue	-0.0282372637934042	-0.0349724660215168	0.0310157281201025	0.00594562804595871	0.00298728015002387	-0.0652908439604237	-0.0380789041609288
Scnn1g	M2	yellow	-0.0885325589119527	-0.0778728350680078	0.0251806673128245	0.0743608245628508	0.0692982694814083	-0.0202864887851454	0.0180724084544691
Scn1b	grey	grey	0.27915925891474	0.268507533220441	0.145616736808528	-0.349739149023373	-0.421346421906293	-0.0878618857069975	-0.160286500586813
Tmx4	grey	grey	-0.0603880535582058	-0.0430696138558666	-0.0632120867252807	0.10544322536867	0.0770229353528421	0.11980371326899	0.144981812014758
S100a10	M4	brown	0.183791217751784	0.171131029074675	-0.0552340363250407	-0.202186853118087	-0.231685729043509	0.0942299354438354	-0.0122663515490869
Cpxm1	grey	grey	-0.124218012994253	-0.00904170705901418	0.0311566472104765	0.140488047042057	0.037539107666709	0.0407265777116151	0.0825952880814563
Kit	M3	turquoise	-0.0989213893548702	-0.185913851974979	-0.328242873516495	0.140569659558693	0.215403400298179	0.183214106220743	0.0948232686273479
Gas6	M1	blue	0.00600957842923404	0.00551151565081016	0.0261052245138874	-0.063870705803549	-0.103615198391252	-0.0501098969228805	-0.044633632526676
Elovl4	M3	turquoise	0.0852450631540968	0.0938298756113842	-0.0299859141876013	-0.0202579055693387	-0.0889112410361337	0.0785688912359825	0.0357309249188577
Gm7694	grey	grey	0.0591085911101899	0.0503442893184037	0.000249248852649031	-0.0503015683327578	-0.0954919430412356	-0.0408698736204147	-0.0600654772795741
Adam15	M3	turquoise	0.249502091156903	0.0587980592416325	-0.419296124997017	-0.0896628237693691	-0.150981885999056	0.198607188370524	-0.0499103183920691
Higd1b	M2	yellow	-0.0811251141579734	-0.158994652791042	0.0188059466212306	-0.00362702919007741	0.0724023733269793	-0.0474832926989118	0.0063442329704846
Plcg2	M3	turquoise	0.162838264661408	0.139878894404369	-0.0371538877917531	-0.126588639918894	-0.216258699558655	0.0373774582683898	-0.0364643583172734
Ppm1n	M6	red	-0.224322544729878	-0.0919159746363045	0.0466591014402175	0.251153151545975	0.223499462279361	0.10364873773162	0.284402421392007
Ptprb	M3	turquoise	0.296740501591463	0.070037239825653	-0.630534129119078	-0.0820345261819297	-0.184413734644577	0.310278566753458	-0.0581535153641976
Socs3	M5	green	-0.0510815523001042	-0.0679084197340375	-0.281111199266718	0.228513144714289	0.0569353210228037	0.591600791916493	0.410040488388009
Cd93	M3	turquoise	0.0763113923752348	-0.0851406868399011	-0.560958544509373	0.0791551352365642	0.00955936461487684	0.373975012211973	0.0880689298523944
Ramp3	M3	turquoise	0.0534670481550873	-0.0873632681464488	-0.27957563164092	0.0140090755628406	0.0289134602179447	0.115681485859808	-0.0340674078408999
Ptpru	M3	turquoise	-0.00820876455582023	-0.0541867388576121	-0.211562294716227	0.0545681827045361	0.0912644602463591	0.104219153783717	0.0640616285148272
Foxc1	M4	brown	0.252091246543599	0.222034619509624	-0.10832285314274	-0.179510790430836	-0.278819553137165	0.142042730183194	-0.0174453579971584
Rflnb	M1	blue	0.107664536285185	0.0130447360051427	-0.122184883575517	-0.0445185502660548	-0.0910521448850281	0.066137878754705	-0.00945336335231692
Nupr1	M1	blue	-0.700234852193486	-0.475222761313537	0.273662950292822	0.571616749183015	0.513660712515232	0.0282518835329204	0.369940879087315
Ism1	M1	blue	-0.391168821048979	-0.238943933190098	0.129154806285406	0.341247697466457	0.319126084100103	-0.0182058917297008	0.202838226195727
Kazald1	M5	green	0.170849853509554	0.157094378883721	-0.0660431612961565	-0.0737377324225705	-0.21253954366455	0.0886775580167196	0.0307359220235664
Fabp3	grey	grey	-0.30325743171764	-0.206398029829088	0.046073611108355	0.251629890008477	0.308221768240084	-0.0178424656383014	0.152236303784831
Cd36	M3	turquoise	-0.105068999146397	-0.294160221227663	-0.615439826438226	0.210267007511272	0.300565356942373	0.246427042620229	0.0594713686420115
Crybg1	M2	yellow	0.0584600490705751	0.0474229844887827	-0.0242983562486337	-0.0435049908379492	-0.0975900333057566	0.0527233069229969	0.0159819533377385
C2	M1	blue	-0.120967829100139	-0.0604694158561404	0.106469911307406	0.0590949899542282	0.0571475969663582	-0.0649866462067514	-0.00424949718985787
Poc1a	M2	yellow	-0.157709564693106	-0.311990064345796	-0.0382507639214796	0.114782024045067	0.169214387008211	-0.0598949738683765	-0.0210185633106007
Pde5a	M1	blue	-0.213401663871878	-0.220977106734951	0.0117169949796198	0.1538192809278	0.193618321569404	-0.0540591518355767	0.0437551665058473
Rbp1	M1	blue	-0.5964075260489	-0.430591573599701	0.167600284064603	0.504369252413619	0.37527356469019	-0.00243708421265715	0.230503088912578
Rgs7bp	M4	brown	0.166544743734535	0.156208530222517	0.153127646453716	-0.317551083961265	-0.222651887862815	-0.143345428838728	-0.166721127198078
Retreg1	M1	blue	-0.42450044198102	-0.253129806869453	0.196782461069623	0.3845655175759	0.328800739222113	-0.0295131872505429	0.231653875429918
Col1a1	M1	blue	-0.606731198039325	-0.357720777111201	0.209444223804589	0.50449800122559	0.470279231281622	-0.0508010241811011	0.274566435391612
Tshb	grey	grey	-0.0197702411044819	-0.0437503873537665	-0.0342502522022364	0.0104814433182326	0.0147543380147858	-0.0611436345008962	-0.0672802466560833
Brinp1	M2	yellow	-0.0171352804947723	-0.0125375684397495	0.0479313395941235	-0.0342723715158466	0.0166292392960335	-0.0531247685879672	-0.0728838323900728
Gm36660	M1	blue	-0.0762086331232848	-0.0177951969148531	0.0733766170261395	0.0536585544671874	0.0547975990699132	0.0135068162529421	0.0931593144067639
Batf	M5	green	0.0417561413517285	0.0256538025399636	-0.0485957429582663	-0.0310290357670208	-0.0429073100814186	0.0346741168162307	-0.0383584198830432
Tnf	grey	grey	0.0287839932880208	0.0347338487416586	-0.0257997121261624	0.0110630579421832	-0.0487162812243495	0.0410869248098216	0.033332993678373
Cd226	M2	yellow	-0.00570581071736076	-0.0874912357666612	-0.00124067592260324	-0.0282100432929023	0.0047374923591085	0.0134496246024483	-0.00859527497451093
Ms4a4c	M2	yellow	-0.107657144390616	-0.0790701901399517	0.072337836650512	0.0393373491640774	0.0721211839497037	-0.0868501637718482	-0.048618826746449
Vim	grey	grey	0.12646792944201	0.0385546108867445	-0.285806834818653	-0.0262427609536744	-0.197713298870777	0.247040651098504	0.0502980869851673
Il6st	M6	red	0.276834491056088	0.192355571610296	-0.300078133311515	-0.166725235188625	-0.232117012000692	0.135694107226986	-0.0821580594138008
Lgals1	M1	blue	-0.588374261426152	-0.408522369079965	0.23525493734696	0.46884475340564	0.446980795016836	-0.0989160765323275	0.202287401776906
Ppp1r14a	M1	blue	-0.737300434005934	-0.56040915682229	0.200156994818475	0.603415198864989	0.60965521237269	-0.0383345164822832	0.325483601867447
Lpin3	M1	blue	-0.110869389488143	-0.0867314748190439	0.0606359010211862	0.0711633732729139	0.0992697097766176	-0.00302368970147585	0.0797282865465793
Krt7	M2	yellow	-0.206954236023999	-0.377307856687657	0.0301870081326786	0.131914062982655	0.176368556980595	-0.0890526632799185	-0.0321144890529497
Nebl	M1	blue	-0.639300227429233	-0.392044975322032	0.170556496782972	0.55644732502025	0.561888685269874	-0.029281914470191	0.324569107151775
Fosl1	M5	green	0.103941189346063	0.0384578249018869	-0.130906786764391	-0.00586030449188358	-0.0761166585217294	0.285526631263493	0.187273958502263
Pde2a	M1	blue	0.240822987993515	0.186783889169366	0.069899107190896	-0.275236308023188	-0.268453351131065	-0.0323865723774279	-0.084132694772024
Arrdc3	M1	blue	-0.33884420188427	-0.211954577369465	0.118239715294376	0.258448885249465	0.265324484371817	-0.0342879384481569	0.165973378715181
Atf5	M2	yellow	-0.339370206215979	-0.319276943688319	0.0287985134276056	0.245522053990213	0.315983091509626	-0.036990987859149	0.0932507295461961
Gm36371	M3	turquoise	-0.0534542263525516	-0.0228662140491499	-0.0171696206282179	0.0694081765840705	0.083365345954426	0.0560950372979605	0.0907065143301472
Myh10	M1	blue	-0.499011639483224	-0.388399645935568	0.1243839321619	0.363252034008869	0.417854387634123	-0.0929881469584198	0.151560803740977
Fam13a	M1	blue	-0.423310616914728	-0.235707039167133	0.145758733279401	0.314462026786232	0.347481651572015	-0.0664097310386203	0.174710551804946
Fam126b	grey	grey	-0.140262905506082	-0.10679326694558	-0.0240399946850196	0.146817170848342	0.151312427740764	0.0441831988914706	0.0956309501039375
Nectin2	grey	grey	0.252299587171685	0.248086654836019	0.185144881968443	-0.394644521609616	-0.338736859287619	-0.0810296644970318	-0.157489789750099
Palmd	M3	turquoise	0.238823406674701	0.0959131375280255	-0.449237739278474	-0.0672976626167897	-0.129664322246741	0.229851916374529	-0.00624267183241139
AW112010	grey	grey	-0.180226698703288	-0.201682935964914	0.0312465513485831	0.161543480044383	0.220970206638419	-0.0474904092210277	0.0526562528739988
Plpp3	M1	blue	-0.703597889258136	-0.437174176280993	0.143576835248697	0.647161484786457	0.568122657238393	0.106465277008262	0.437165310124239
Wfdc1	M3	turquoise	-0.125716233694026	-0.125442936493538	-0.338855916767478	0.158142567471584	0.219236894794273	0.152900147634427	0.0498004858460751
Ccn5	M1	blue	-0.583086491685631	-0.349040118601815	0.197535213444904	0.493987589225633	0.446749248959458	-0.0269207939978529	0.281951309389664
Ptprd	M1	blue	-0.607070930988488	-0.340772545664283	0.163002806501631	0.492203902560193	0.509708479794299	-0.0377792646950361	0.255255746893851
Gm49741	M3	turquoise	-0.0325163581419064	0.0200368990921031	-0.0451209903117716	0.0525104711492547	0.0610850450889926	0.041174536606496	0.0501757730117675
Ncam1	grey	grey	0.118553647306483	0.0834570731421578	-0.0829160651704696	-0.0912399800023556	-0.160836066280937	-0.00245960490139343	-0.0858494079302387
Pcdh17	M3	turquoise	0.124439561869676	-0.0261530759695329	-0.420286633546698	0.0220995688107324	0.0447510038875502	0.356224780183851	0.17032868386551
Grb14	grey	grey	-0.100787735321093	-0.124948635939304	-0.0482288327612075	0.0892415973056032	0.181171617201018	-0.0271749503091528	-0.0155373029399744
Gipc2	M1	blue	-0.126515891350017	-0.136915762074032	0.0487161821080777	0.114907435042053	0.102536370831259	-0.0109382377151478	0.0572914909038443
Dnm3os	M6	red	-0.113975085118264	-0.0225972140357363	0.0182596398115092	0.132529268827166	0.111809044256556	0.0321831383427742	0.119134827581094
Irx2	M1	blue	-0.0319791596955082	-0.0149846337650347	-0.0120140696023073	0.0288183298931076	0.00520773222445623	0.0156686552222581	0.0258056006751489
Hmcn1	M3	turquoise	0.0601386778506106	-0.0201251974162712	-0.362659646684455	0.0393987487404556	0.0734921921836031	0.195234770151385	0.0282024862779168
Prelp	M1	blue	-0.683989716133424	-0.444915121214257	0.302015823398291	0.447412935668857	0.464727820721442	-0.0884050506389675	0.244746957894943
Selenoi	M6	red	-0.0581374861791445	-0.00693862139444562	-0.0617204675861425	0.0749117984636553	0.0957103562106419	0.0602303818069554	0.0835832554547142
Aebp1	M4	brown	0.0234449677793499	0.124654893830644	0.135511785700998	-0.0869590414725172	-0.13287906646593	-0.0655473091385854	-0.0328917413277484
Ccrl2	M5	green	0.0312158510003839	0.0184266457633357	-0.228385907763426	0.106398718228521	0.0552002558150557	0.295795626255635	0.187343242802241
Itga1	M3	turquoise	-0.0503729865808329	-0.185786417554636	-0.480223271318913	0.133262871548726	0.224119443455587	0.179313294548645	0.0487222209272373
Crispld2	M4	brown	-0.589109142244318	-0.348924583810269	0.124300020259787	0.5734195899205	0.504967834668236	0.0566027155172836	0.39652185037436
Iqgap1	M3	turquoise	0.20909349329552	0.0965235505829009	-0.377301032132753	-0.0523463633590965	-0.119250711391179	0.292833287512909	0.0716337148293978
Mid1ip1	M5	green	-0.185243037485732	-0.197687949455208	-0.114926186186059	0.200816264510493	0.204367433627439	0.195485916414811	0.201283499003588
Pcdhb8	M1	blue	-0.153772462582406	-0.102829770138549	0.102153882441806	0.0918270735811122	0.104721008533415	-0.0503244438906691	0.0444200228633381
Nudt4	M1	blue	0.258058231711458	0.182781341078469	-0.0501882008026751	-0.261222677853563	-0.299529107629191	0.00741449795963546	-0.119224401419677
Sytl2	grey	grey	-0.221110643458661	-0.139863246781876	0.0519808486966608	0.154121266003567	0.231863272089126	-0.0527811391456681	0.0800877717391413
Pltp	M3	turquoise	-0.0770506058674217	-0.316558793967587	-0.60692131203271	0.180333112053732	0.232957100651405	0.263011465384046	0.0111414181854939
Ryr1	M2	yellow	-0.0205046567436151	-0.0259022836593298	-0.0302035792099901	0.0416610477036515	0.0506919622442076	0.0424199269141629	0.0513913765297354
1700120C14Rik	grey	grey	-0.0340462822589403	-0.0224496858622223	-0.0280920726032477	0.0478501029486127	0.0569829863730412	0.0607049936484142	0.0206668651607143
Gm26682	M1	blue	-0.0538255719630577	-0.0403238274627022	0.034875470221259	0.00626266098377983	0.0101325619165907	-0.0278491581812956	-0.00559695518019833
Pcdhga2	M3	turquoise	-0.0467715288767121	-0.0262929976283058	-0.0260159591889474	0.0629705026236402	0.0436611968683627	0.0464594688590904	0.056487344881245
Zgrf1	M5	green	-0.037343523824639	-0.00879916501010157	-0.0214119875411282	0.0386103212835071	0.056228113453112	0.0410428690533072	0.072933000785176
Whrn	grey	grey	-0.059844694397785	-0.0377690804544054	0.0395982827922858	0.0926803305089551	0.0690605845524873	0.0277577549269778	0.0838163579580242
Tafa1	grey	grey	-0.0569375391669771	-0.0980104223884347	0.000292330737526095	0.0442621615016341	0.0577234421488153	-0.00780317112867385	0.0437355091120741
Gm26532	M3	turquoise	0.0601375504307334	-0.0428545398543311	-0.216781173561863	0.01653129364032	0.00153388528367344	0.295963997721402	0.141454830294485
Gm30648	grey	grey	0.0437852962421137	0.0351849772740082	-0.0484089331691345	-0.0389644098442781	-0.0336900017336268	-0.0155093639789111	-0.0727067613446433
Cldn3	grey	grey	-0.0223325335361521	-0.00209941047850725	-0.0519978238657873	0.0263796282813421	0.0124681924793402	0.0234192097468792	0.0221092574067404
Ckap2	M1	blue	-0.0214100567660399	-0.0119693613827622	-0.0113719969621013	0.0602119776526426	0.0153070573157227	0.0374989510543232	0.0454185913319433
Gm40841	M6	red	-0.0398792222978206	0.000373238509979461	0.00350570707362192	0.0250856456424885	0.037375573404147	0.0698297021255733	0.0695412076321689
Kdr	M3	turquoise	0.114286386148545	-0.0667727926338588	-0.0718710245740385	-0.230431689893737	-0.0411901812382712	-0.066891486955407	-0.149585093399165
Pecam1	M3	turquoise	0.262594571732136	0.0131140013813123	-0.56432306148831	-0.0725382660969509	-0.158208254823917	0.269084194577499	-0.0617678051937602
Pcdhb14	M3	turquoise	0.034742342085057	0.0261529290946474	-0.0845957861435732	-0.00651003631608351	-0.00333912979494273	0.0518554693261677	0.0159541358154018
Egfl8	M3	turquoise	0.0487541603323445	-0.00681918442119961	-0.133173661624665	0.0114765642350488	-0.0221990591506147	0.124609615620913	0.0516493050255378
Filip1	grey	grey	-0.125164670392916	-0.090009307024797	0.0106933937989007	0.132724188175891	0.135995187809077	0.0242246871773877	0.114779721030605
Nos3	M3	turquoise	0.300173748706114	0.200210461144384	-0.211747289280896	-0.148206108051391	-0.318615761754179	0.152857945067702	-0.0462279203763647
Egr3	M5	green	0.0666326996738725	0.0332347338025593	-0.122288406699076	0.0278144024601235	-0.0222974316282366	0.272646114790629	0.167209643526452
Tbx1	M4	brown	0.235591181072436	0.217080017747777	0.215411195932125	-0.423541251415628	-0.300578163133599	-0.181181497106697	-0.219471255126987
Ptgs1	M3	turquoise	0.292329685392434	0.168954010694233	-0.30038828378562	-0.122343462605277	-0.250453660775622	0.162900517306559	-0.0617778823317713
H2-Aa	M3	turquoise	0.0348154663023004	-0.137611332120584	-0.424143851555234	0.0693268417871243	0.101702551467898	0.205400121436035	0.0075368410104101
Nr4a3	M4	brown	-0.112011947749883	-0.0458103740198766	0.0761890251651078	0.16965636268027	0.0631599834450655	0.113250635410969	0.233817118966134
Tnfaip8	M4	brown	0.133973341610442	0.147978268049989	-0.0147885078926158	-0.10676326689329	-0.190643842898409	-0.0181334770642041	-0.045567145036083
Kcnb1	M3	turquoise	0.101110860831463	0.0649429668748852	-0.191668618000842	-0.0356880287100863	-0.0673039477023518	0.0493360804352591	-0.0460298317613588
Clic3	M2	yellow	-0.207664861578828	-0.391613548561234	-0.0245623575894943	0.15181244479302	0.202336465975645	-0.0324184999018834	0.0120699211987624
Lmcd1	M3	turquoise	0.262960232810432	0.212474996692641	-0.0146969877789054	-0.226596727377192	-0.327268098462727	-0.00668877739599172	-0.118182082743493
Zfp30	M3	turquoise	-0.0834415542885333	-0.0720469180742193	-0.0537440446619405	0.0972515468547381	0.0955880513560085	0.0536800431878306	0.0728738745643882
Gm9913	M3	turquoise	-0.0823044499633102	-0.0280426050991254	-0.0200809766188485	0.0967274096309056	0.102894834214659	0.0544266753706996	0.0665583511940901
1700021F13Rik	M4	brown	-0.0940291470651218	-0.0129553787484557	0.0791310092329855	0.123256138332723	0.0427013704395744	0.0509895973385206	0.107711194614668
Hic2	grey	grey	0.00136795080319839	0.0173054868718337	-0.0299311846749217	0.0330403960711289	0.0331576975492433	0.080489504390757	0.0838848337413298
Ccl19	M1	blue	-0.0894402591399629	-0.00030648444003046	0.0378689829083762	0.0776833875862448	0.0599910940102234	0.00201173276724528	0.0436175851695196
Nr4a2	M3	turquoise	0.0934435782415055	0.117882104621507	-0.042405572147114	-0.0169376744860082	-0.0598412204595079	0.183650550093896	0.16062125006693
Trpv4	M5	green	0.161401620499906	0.117872960816673	-0.0760031915362866	-0.0992952424431071	-0.183987223920197	0.0865859672626073	0.00860740755280351
Stc1	M3	turquoise	0.0598117982435044	0.0238573845695371	-0.103878304323398	-0.0543047706220152	-0.0398739161281816	0.122508467904686	0.0409467322522583
Gxylt2	grey	grey	0.150344387468255	0.147947904981404	-0.0713579580344843	-0.0855686938812752	-0.217345396126766	0.0422385117286192	-0.034845227440339
Tubb2b	M3	turquoise	-0.0278314239801404	-0.128183011758419	-0.140127391232151	0.0624472206092653	0.0822847050212079	0.140503011353454	0.0459823223302896
Igkc	grey	grey	0.0428884225477708	0.00112514770933439	0.0301884147295136	-0.0765674408776611	-0.0677864224732687	-0.0404654772513162	-0.0575598209528996
Cp	M1	blue	-0.201985837763544	-0.0547468254372236	0.283806781671201	-0.00752159221538294	0.0501716182946216	-0.116171401163035	0.0757700952771528
Pcdhb20	M3	turquoise	0.0282228179147197	0.0107295893992681	-0.0762344928048418	-0.0225651032896393	-0.0176299695684114	0.107696780679271	0.0825841885345618
Palld	M1	blue	-0.386181685362478	-0.313237787883176	0.064797340859771	0.321802375057029	0.32680951296531	-0.0200434227082386	0.154833973050623
Twnk	M2	yellow	0.00308493642675697	-0.0573804702576775	0.0154847445221923	-0.0493679326086423	-0.00653433314646744	-0.079977086688695	-0.0761639488984661
Sox17	M3	turquoise	0.0482836495074437	-0.118926846346379	-0.350813781118263	0.0714913538778426	0.0425868557885332	0.276688201428786	0.0838256810649968
Fhl1	M1	blue	-0.80113252714801	-0.535058383955546	0.188177551429033	0.660457693520672	0.62096257119453	-0.00696003422321744	0.350036953579206
Chchd10	M1	blue	-0.134285257980836	-0.182930430089768	0.0503776595243398	0.10344036366744	0.139563959718885	0.0169521083704826	0.0905300132903567
Tnxb	M4	brown	-0.089900395377158	-0.0280094511088231	0.16745588381206	-0.0394883925811451	0.0162854241194379	-0.0975408420131728	0.00486753196774881
Dapp1	M1	blue	0.0585098185115513	0.0342838570077699	0.00582810893128892	-0.053851240729737	-0.0700119918606978	0.0097002329984651	-0.00812188721598845
Cldn11	M3	turquoise	0.0805566727066813	0.0559818462401502	0.0841391019874572	-0.125149958314578	-0.102634869390598	-0.0749670965269282	-0.0610672918634667
Efna4	M1	blue	0.0273965068977188	-0.0389733935415257	-0.0648559409003078	-0.027745279694313	-0.0135456143875101	0.034442747786542	-0.0247194090950453
Cep126	M1	blue	0.045126770523242	-0.0170606108819173	-0.0240705867667413	-0.047072940717805	-0.0195347305085247	-0.0175273599706641	0.014017656281877
Gm1673	M3	turquoise	0.102745282781361	0.108260850448258	0.0747893095671708	-0.181890605557161	-0.180337300736689	-0.109987791812386	-0.125441562446481
Lactb2	grey	grey	-0.138874482733979	-0.0204830147908187	0.0401354237268855	0.127156446953377	0.10451274282017	0.0116364221802054	0.0988944110664132
Alpl	grey	grey	-0.00334268166951538	-0.0709486404399983	-0.0139767360125929	0.0546833522016115	-0.0038572108193575	0.0110987517733035	0.00954302118795741
Osr1	M1	blue	-0.0711525992182689	0.0204585689753209	0.106264341373909	0.0350415919694095	0.0142211131185362	-0.0375421624404976	0.0531970639070049
Wipf3	M1	blue	0.183757347524829	0.173047379293457	0.0777883514192343	-0.263722270413909	-0.249281580343927	-0.0561381850683598	-0.119281425572796
Gm17056	M6	red	-0.248207701053467	-0.0285738655408326	0.0570788232534158	0.307100250764058	0.217551941981133	0.200338952550097	0.409413448540559
Itgb4	M3	turquoise	0.292119957848677	0.230425421114131	-0.187072458472878	-0.177616762307873	-0.308239265423058	0.113901328323115	-0.0506289425255071
Atp1a2	M1	blue	-0.62358873581438	-0.383504885547079	0.156560275402722	0.51463954275611	0.516983030679594	-0.028214109442393	0.295445902441223
Mecom	M1	blue	0.11943658248727	0.142900045135135	-0.0654313296465395	-0.0182783324878721	-0.161747417227267	0.097960392481534	0.0432040539917704
Cystm1	M2	yellow	-0.149644667778009	-0.353018569406979	-0.0446295961955106	0.112422467719956	0.16527175805474	-0.0235899405378911	-0.007663318084278
Gm3336	M6	red	-0.16510763074641	-0.121011488006891	-0.0074936889663508	0.194840262260548	0.16003706422417	0.112128544772355	0.217912730743926
Olfml3	M1	blue	-0.589785463802908	-0.34070286402931	0.186769993249309	0.483581135329038	0.463579888748078	-0.0504489746729784	0.259606555316113
Irf1	M5	green	0.0386199443370766	-0.0647633637987578	-0.347280120968037	0.160709339842958	0.0556360284860111	0.539360983399535	0.3006676405226
Dleu2	M5	green	-0.0835987740283501	-0.00722888435766356	-0.0357271173464206	0.105233272062668	0.114648914668726	0.20261518445833	0.203783829829426
Tcim	M5	green	-0.289207918419109	-0.257978967161548	-0.26888367143833	0.359798685001538	0.392248298769283	0.272672736080684	0.274980284055061
Fmod	M1	blue	-0.228818348274995	-0.149200626649817	0.0766321945055315	0.177044047851864	0.160636844056351	-0.0343656900085626	0.0948874974361996
Utp14b	M6	red	-0.180936940285718	-0.0800107361062964	-0.00062198742179161	0.213920079298724	0.174229695278337	0.113431355699954	0.249851065704497
Foxf1	M3	turquoise	0.00326300094193681	-0.229339562194755	-0.605560106122072	0.119344241508801	0.217301830341279	0.217834196618985	-0.0394793875582361
Cd24a	M2	yellow	0.151424891701528	0.115836681072818	-0.0107494820047242	-0.123242230819877	-0.18705081416857	0.0540282324271834	-0.0064481208353579
Prdx6	M2	yellow	-0.574158167657978	-0.538485348306308	0.111868691128581	0.486250855435296	0.414015821242282	0.0189251879318182	0.235581148832831
Egr1	M6	red	-0.249974375616203	-0.108970583409785	0.0202970009382273	0.399970026871057	0.190662755743356	0.607731022828632	0.716828959949409
Myo5c	grey	grey	0.0213336242590334	0.0354739911101498	0.0797687273700388	0.0180647200740714	-0.00936341081876317	0.0348232494528965	0.0299783240274487
Cldn7	grey	grey	-0.0496966024329685	-0.0124584845107367	0.0321805523282091	0.0534590177572468	0.018960054643671	0.0354929432198424	0.0716545678030107
Gm10101	M1	blue	-0.046806654551028	-0.0576802784443427	-0.00486788655730415	0.0332842512294766	0.0379036486305231	-0.00493362151156091	0.0183738091270743
Tyro3	M3	turquoise	-0.0416415776878474	-0.052871206888315	-0.0340990726684261	0.0431330041236959	0.03781786266986	0.00536161879370442	-0.00291842267823908
C1s1	M1	blue	-0.295263236592134	-0.145572341255512	0.0917795727474859	0.25369195044175	0.233570200968914	-0.00999744432233738	0.108845067382858
Pcolce	M1	blue	-0.625638450753767	-0.364911897276473	0.222099171077552	0.485568278550957	0.455235515685259	-0.042503319427528	0.268452685766324
Scn3a	M1	blue	-0.422675161577307	-0.234714521284622	0.143775044532127	0.299549350903503	0.331148920699747	-0.00488212317279041	0.189800593335968
Alcam	M2	yellow	-0.312608435794933	-0.318269719346946	0.108774457456206	0.218264998943862	0.2263516700471	-0.0487452772801866	0.0980621883328045
Serpina3n	M1	blue	-0.18281947739593	-0.062643977718909	0.100715067186871	0.138522117489819	0.120096040926656	0.00991424205167538	0.118891016556198
Sbno2	M3	turquoise	0.0960563672209269	0.047295565278771	-0.367459871342865	0.0886056511146571	0.0251630441518183	0.43811332610417	0.222410295163817
Alas1	grey	grey	-0.434058434295143	-0.242238763820541	0.0145099596663843	0.410963836033318	0.414927554507436	0.0395275790989797	0.240842876786721
Enc1	M5	green	0.0319962096074038	-0.0516954321630188	-0.134152715950406	0.0275186195437899	0.00918380751206071	0.216043405147401	0.114339363055073
Ppp1r3a	M2	yellow	-0.0764073719732504	-0.0496681540323282	0.053846135562265	0.0843844728146334	0.0799557793001261	-0.0158913078865907	0.0356357756464008
Shroom4	M3	turquoise	0.0338458399685086	-0.00424031875342426	-0.122334608844727	0.0234835875601996	0.0126197314506754	0.0723674540289785	0.0265291182642756
Dact1	M4	brown	-0.215998111006236	-0.0809773925352939	0.101927419771307	0.242263465798327	0.170096811886804	0.073662258000724	0.193344228287525
Fyb	M3	turquoise	0.0217959882236234	-0.0540299462369941	-0.0254121801680784	-0.012541529903431	-0.0328258968737094	0.0180911969438675	0.0173585897055035
Creb5	M3	turquoise	0.152830945945199	0.0949435678497005	-0.0495027730279321	-0.147802093559278	-0.133466090561882	0.118678414873335	0.0125079634880392
Matn4	M1	blue	-0.272087573057404	-0.165716897437259	0.0704999379059308	0.291254605524836	0.230930802253183	0.0622129725496752	0.259735866346807
2810408I11Rik	M5	green	0.0304342389151694	0.0792658244594779	0.0392878574454366	-0.0206372836525828	-0.0223300656022363	0.110323185792063	0.113036006034467
Rasl11b	M1	blue	-0.444200639605947	-0.241625660871198	0.177855022073352	0.377852370545158	0.339476206782671	-0.00896380808816785	0.256884722755922
Spock2	M2	yellow	-0.053889426066236	-0.1186929360674	-0.0128371070128878	0.0435844647494545	0.0404296738480322	-0.000920926546112366	0.0090852369439822
Mustn1	M4	brown	0.223100262617128	0.145719560533301	-0.222349263653727	-0.100016048828899	-0.170001914903753	0.125015685882251	-0.0256748999149588
Jam2	M3	turquoise	0.294321748226406	0.191226892444701	-0.296251420229853	-0.113124887914682	-0.284555258082806	0.173489425766462	-0.03900833416812
Pim3	M5	green	0.0707593095736827	0.012868732846585	-0.294407050862005	0.0567182091792818	-0.0611855819830624	0.391029602171277	0.163622712919598
Ndufa4l2	M1	blue	-0.105791701716442	-0.193651525382212	-0.0004283693020401	0.0446397381858871	0.11212806912691	0.0181510019804032	0.0669828385182476
Meox1	grey	grey	0.139133201534255	0.08197611276796	0.172780526532627	-0.300807471733441	-0.174203459712662	-0.187745768262794	-0.169877376792557
Scarf2	M1	blue	-0.639078248443931	-0.392847332827302	0.189280751214789	0.533023313224572	0.518984229021267	-0.0547891011102001	0.293076202022192
Rprml	M3	turquoise	-0.0920482874137424	-0.199388338181904	-0.211084967754707	0.137006677594966	0.207217141628569	0.0709381867455348	0.0208206007653463
Cd34	grey	grey	0.0388515711222299	-0.0590570140169867	-0.186739554022824	0.0262419478531592	-0.0423194735000231	0.0403940467483327	-0.00373890070355074
Svep1	M1	blue	-0.489099405942821	-0.317594275804898	0.141514484778733	0.358055662913349	0.386337718671589	-0.141148491485213	0.121040762640578
Trf	M1	blue	-0.435193280385341	-0.271480794427404	0.119065030582325	0.315235605233563	0.355601484335186	-0.0742374854579796	0.126608911479187
Bdkrb2	M3	turquoise	-0.0422990122437775	-0.0818118905426739	-0.119488424292543	0.100249057475696	0.136044238016488	0.0735195316180791	0.045747133902362
Cyp11a1	grey	grey	0.0376055449157009	-0.0306784626664711	-0.0404029810666555	-0.00658566183872683	-0.0407582270297371	0.0507222616366895	0.0366210256367068
Wee1	M6	red	-0.131999516863131	-0.0396395277055311	0.00829652290037534	0.211214892352315	0.105418400004776	0.160872810446326	0.28071248776991
Gpm6b	M1	blue	-0.484492487938678	-0.368924059072227	0.0952870940277186	0.376947136826404	0.439814139927903	-0.049460206188435	0.171582482946292
Bmper	M1	blue	-0.331191155782891	-0.232361829439059	0.118544725715224	0.274185190221441	0.271015573234064	-0.0313927059802643	0.129216310935773
Snhg5	M6	red	-0.134594123229126	-0.0897175245037211	-0.0041369779678089	0.1702024274417	0.151872564788473	0.158391795343965	0.213270142903943
Tspan8	M3	turquoise	-0.123764115446522	-0.242600993136306	-0.144738416216343	0.119541574473017	0.195762713576517	0.0313507004267714	0.0392349390749718
Prkca	M1	blue	-0.502294146190863	-0.259506774227853	0.188063785647673	0.403668049132644	0.384368559126474	-0.0361565196900085	0.249063964764735
Gfpt2	M4	brown	-0.0647571376797868	0.00559798495399232	0.0220983548301806	0.0959645018585188	0.0421530480167492	0.061437575578712	0.125393236619893
Ndrg1	grey	grey	0.301033282074132	0.28000941752249	0.0252980694908927	-0.336275988391636	-0.382887077861246	0.100378951813337	-0.0199579343500061
Mamdc2	M1	blue	-0.475245092010261	-0.247066349723942	0.14751669073391	0.380150102136303	0.37288586230092	-0.0310391995677776	0.202993473937399
Lrp1	M1	blue	-0.632021749265795	-0.392722336627633	0.187696360218979	0.50668973151893	0.521650774968787	-0.0881810586811168	0.254430945261899
Prr7	M3	turquoise	0.0943375780337559	0.0571060105069246	-0.12400009398794	-0.0428368678506709	-0.0551393030805232	0.223684434848793	0.0895422630727421
Tuba1c	M3	turquoise	0.155748204728641	0.0698372376399304	-0.134313182772966	-0.0276837777766421	-0.155477092191976	0.296601864472166	0.142587127127346
Tpi1	M3	turquoise	-0.131171586472123	-0.0839419696412131	-0.0664860364532783	0.140255934016707	0.111489007590813	0.0729103151597593	0.11524367880143
Col8a1	M4	brown	0.128924696350321	0.115129573766982	-0.0263465557000992	-0.101578661041169	-0.224519108340998	0.0530183472758473	0.0189029763795838
Smim41	M4	brown	-0.464491883513309	-0.327040212922646	0.0998720477812054	0.447459086190255	0.400604192741563	0.0143557303258913	0.235769155990832
Fxyd1	M1	blue	-0.634899479842512	-0.444305156119382	0.220573507413599	0.489976212798907	0.505252947895761	-0.104532591048405	0.225192122492897
Kcnmb2	M1	blue	-0.0728361433717611	-0.0325830904023254	0.0176765008605452	0.0456012601213826	0.0679238910717265	-0.0126492558041883	0.0362733638212514
Zfp941	grey	grey	-0.0152142706887742	-0.0406693225398691	-0.0415139267574237	0.0563318747334172	0.0377310248148696	0.0710922874053993	0.0607874972338196
1700041G16Rik	M2	yellow	0.0763206570781729	0.0642983517539089	-0.037601686326348	-0.0228600331286766	-0.085498310651594	0.025587844615116	-0.0379567767277367
Samd15	grey	grey	-0.00640921926574949	-0.0265270568496075	-0.0559016176010439	0.0343240738093719	0.0252934440503797	0.0305229787019961	0.0422247898977874
Loxl2	grey	grey	-0.0169002575045277	-0.00758995295607133	0.0597345753874505	-0.0555859750102323	0.00933907457971516	-0.00400422080647636	0.016155086958253
Crim1	M3	turquoise	0.248782150442959	0.0816849841458322	-0.378803284305413	-0.134320280908669	-0.177638413850975	0.202666786096669	-0.041481559614579
Hes1	M5	green	0.0564486659964766	0.0403790678393978	-0.106609559617843	0.052818478097324	-0.0422059375582599	0.452425494484641	0.29856489123304
Clec3b	M1	blue	-0.647729821145285	-0.397667828767103	0.232880600180865	0.528687068945401	0.450236466038108	-0.0329889535134291	0.300659606617664
Nckap5	M3	turquoise	-0.10218159247815	-0.189609407812387	-0.383298182077333	0.173262098338944	0.261992250471903	0.170844089972605	0.0944520062094565
Cdkn1c	grey	grey	-0.0331701096342457	-0.0243332816397168	-0.00570580393172557	0.0650692820674045	-0.00878777239603372	0.0951755399863373	0.0858936166663196
Nfil3	M4	brown	-0.0976171944686288	0.0175366918769961	0.0840392618025584	0.147795105455851	0.0425747882632764	0.176012292438127	0.262517121610524
Dpt	M1	blue	-0.416431446802221	-0.349034115993059	0.102143963282861	0.321134285749418	0.369382324259607	-0.0558422955979988	0.148175578068064
Ccdc39	M3	turquoise	-0.0302477415865847	-0.0411919684805196	-0.0571946927732328	0.0215553681197698	0.066789876202324	0.00831574046091195	0.0206912270188975
Chia1	M2	yellow	0.0228729688679404	-0.0110304969422823	-0.0337205685290681	-0.0228243129793215	-0.0163199393347416	-0.000491017318595586	-0.0332428106362336
Tnfsf15	M1	blue	-0.0861200006512604	-0.0517511188690457	0.0082346529626294	0.0609815490713157	0.0962641013142487	0.0358594271725874	0.0588749270510576
Gm15927	grey	grey	0.00671151423407763	0.061814526294537	0.0575782446274103	-0.0225427806556678	-0.00882244702182499	-0.056856299681017	-0.0314035134718102
Hs3st3a1	grey	grey	-0.0886621323840006	0.0169121368214858	0.0340347524502516	0.0732526233359151	0.0644233520401973	-0.0467716341050692	0.0189792267872722
Itgb7	grey	grey	-0.00613825722146296	-0.0464260049062949	-0.0524892003645086	0.0249869364297868	0.0186769156763395	0.0308871753626967	0.0291970368102419
Anxa1	M1	blue	-0.189571267327923	-0.103119436075444	0.0743688952028101	0.147953228084137	0.116862954688484	0.0512669462057106	0.160055458417087
Col13a1	M1	blue	-0.679869342486405	-0.402205179308545	0.218537614150918	0.560156122553656	0.551551421187502	-0.05386196468267	0.301460194492806
Tbc1d8b	M3	turquoise	0.0468280316919708	0.0752078114599922	-0.0799819458735634	-0.0073175713132345	-0.0600310634175382	0.00850339313752906	-0.0293660714626308
Tspan18	M3	turquoise	-0.0408177557644341	-0.127965270343875	-0.248657635800775	0.0266406759051082	0.147975176604163	0.121542966328206	0.00164974629940023
Entpd1	M3	turquoise	0.195663309237353	0.0367536496931365	-0.431063026075286	-0.0576696832218458	-0.0553886483361642	0.18965920944579	-0.0345952331504876
1810010H24Rik	M1	blue	-0.588136122865138	-0.343181600642052	0.215578792662349	0.49489295094951	0.473409957283717	-0.026776536351119	0.300150672834817
Ctps	M1	blue	0.12527243042121	0.0664539582334083	-0.14472655434561	-0.0256030235116173	-0.0733270620638875	0.0932293222912193	0.00199937694560118
Col6a1	M1	blue	-0.565432223621418	-0.349622205981492	0.117654669315265	0.467593657933942	0.464132403156399	0.0181007838077194	0.257802143470149
Akap12	grey	grey	-0.192549683083112	-0.25828785079122	-0.128618445329991	0.132407407694353	0.220463284360546	0.147555817170797	0.121986871153249
Lsp1	M1	blue	-0.190960170628194	-0.0759637445754499	0.0296011770902103	0.152350002627836	0.164932042768074	-0.00275899196538784	0.0945632853828344
Pla2g4a	M1	blue	0.233134039579094	0.174761683731677	-0.162796823561998	-0.129255777498653	-0.208027599334167	0.0752693500359253	-0.0703262780654107
Cldn5	M3	turquoise	0.16899650676064	-0.045713162111611	-0.495430225163292	-0.109140407858767	-0.0298564499814238	0.204759567120172	-0.0862149317191701
Ptpre	grey	grey	0.146764661184809	0.0696687931557452	-0.0210018627412351	-0.166012779264288	-0.189973931177041	0.0470008375494962	-0.000388749741251102
Limch1	M1	blue	-0.791198894370973	-0.625195734227105	0.190431075393494	0.644167051738232	0.621143059990917	-0.00717452955074364	0.328667145662424
Spaca6	M6	red	-0.120872630529967	-0.0518405924280382	-0.0230339669404576	0.135069205204123	0.130109035000588	0.104314679831846	0.186685552615261
Rora	M1	blue	-0.446692176090264	-0.299152131903253	0.0871282360233092	0.42495730499672	0.384200444108454	0.0372548392369159	0.289671866481098
Id3	M4	brown	-0.0733668789837989	-0.000454396447113218	-0.0592097971693988	0.173476172453642	0.0121878106118822	0.226261832724476	0.241190041292959
Nppc	M2	yellow	0.0559077834195418	0.0553098033111445	0.0697789417992336	-0.0802581502732577	-0.0603757008908828	0.00689181748054066	0.0294554516055672
Rad52	M3	turquoise	-0.009707907839078	0.0150523896094934	-0.0392979562220722	0.05230899606412	0.0364821432776718	0.043111299232249	0.0337301825173484
Spta1	M2	yellow	-0.0779071430186781	-0.0613776451441816	0.00560883627529963	0.0547304302177819	0.0763395749279119	-0.0370385118122039	0.0181455452491671
Cercam	M1	blue	-0.0890260092476036	-0.0200845364313794	0.0748498645770161	0.0697996610139329	0.0706949143006562	-0.0273229614843944	0.0311714368735115
4631405J19Rik	grey	grey	-0.0497486867326402	-0.0723681559705319	0.0143366923614558	0.0464360957211972	0.09096230717853	-0.0372137575960895	-0.00212740934064478
Sycp1	grey	grey	-0.0391842363859835	-0.0230078142318384	-0.00904740425487186	0.033637113064396	0.0470185632771483	0.0385553783888412	0.0520610413583399
Cntfr	M5	green	-0.00589973287433538	0.0385975890412987	-0.0345925135489702	0.0186198549026069	0.0115892035088638	0.0389430932986747	0.0591293581498742
2210406O10Rik	M5	green	0.00991797298585737	0.00382650767261459	-0.0663222256000488	0.00474178230131962	0.0159974391651133	0.0729470837190247	0.0173355213697453
Adam1a	M1	blue	-0.0682737286123539	-0.0920040590816101	0.0128744943584243	0.0399375682967106	0.0489589819940727	-0.0571119707935109	-0.0107398730582921
Slc25a13	M2	yellow	-0.0116553461309513	-0.0237608946833551	0.0320962276073634	-0.0232565390245083	-0.00265076848720299	-0.0268410984589727	-0.0563526812958504
Slco1b2	M3	turquoise	-0.000210456749204232	-0.0449015054173039	-0.063208448308886	-0.00749289157777882	0.0181142420439818	0.0598995271246638	0.0235818889693904
Cemip	M4	brown	-0.0709536974266284	0.0356266458089321	0.0652558603246881	0.0825375024015816	0.0465934085581405	0.0252338820640553	0.0701627196318129
Ccdc189	M4	brown	-0.00404888609698216	0.0212307142171031	-0.0351966360502566	0.0282536040031628	-0.00971674673916755	0.0550548627826092	0.0496126448164185
Kcnmb4	M4	brown	0.0279027331394128	0.0521900895747986	0.0178429072398803	-0.00523789753275345	-0.0242292347185279	-0.00919728690383863	0.00761046804840275
Cntd1	grey	grey	-0.00819770773635043	-0.00595565611885914	-0.0264158373428708	0.0205688636572088	-0.0022451169318821	0.0313750711999522	0.0484078753854505
Pgbd1	M2	yellow	0.00423235242185233	-0.0489038327383127	-0.0361476796636877	0.0352308101377353	0.0191541444200936	0.0559275570163203	0.0206273883159918
Gm49785	M1	blue	-0.0814297114040703	-0.0165885525772655	0.0373519140853536	0.0421900581064528	0.071227187763891	-0.035052848916082	0.0213677027832442
Hcls1	M3	turquoise	0.0296228136549924	-0.0130388626789944	-0.0428711208728513	-0.0130997545857459	-0.0479625645762048	0.0235665809382591	0.0150138094348114
1700063J08Rik	M4	brown	-0.00208982124610902	0.012280668929907	0.0118280497611564	0.0421405833346613	-0.0141848953860459	0.0540933847240455	0.0563619048865149
Gm1976	grey	grey	0.0319972296146697	0.0468706448876513	-0.0340068243337337	-0.0418691519288103	-0.0271718587653193	-0.0712384519141222	-0.0761067845811335
Kif20b	M4	brown	-0.0510422067309329	0.00174584696342031	0.0528374462619472	0.0324126580554129	0.00502083960222993	-0.0225297374783222	0.0368663184787719
Mettl21e	M3	turquoise	-0.0643076967365561	-0.0404792139996636	-0.0402557043723316	0.0504024486561983	0.0685910841916181	0.00405132852735169	-0.0211456591957708
Gm13269	M3	turquoise	-0.0590234500013805	-0.0118469895548486	-0.00890639636067992	0.0601872793450371	0.0441866762588879	0.0645206519336449	0.0752244528796808
4930555A03Rik	M1	blue	-0.0393986507235578	-0.0456449182242907	0.0156897793945365	0.0499752202721769	0.0394246363424312	0.00903785570663002	0.0191139221310056
Hif3a	M3	turquoise	-0.017347861227805	-0.03039334382738	0.00455293878119625	-0.00587943786905699	0.0137110706744596	0.00444737170899376	0.000586448305700515
Gm17322	M5	green	-0.0678715886355685	-0.0168194113885558	-0.0324306920497952	0.0728007693876023	0.0750575271859447	0.075543237612202	0.0881845448470126
Trim17	M2	yellow	-0.048369922100895	-0.0380804927860268	0.0544516822185099	0.0264209365244997	0.0702694453672887	-0.0637467217388474	-0.0179814229662372
Pnma1	grey	grey	0.0356262247892836	-0.0261410073402491	-0.00923296833016086	-0.0126114997999938	-0.0243407870326306	0.0299980918099017	0.0315217376738441
Gm48960	M4	brown	-0.0309722300439214	-0.00726275143555804	-0.0214033909830482	0.0429552613360615	0.044206999775637	-0.0325232694203585	-0.012919246227513
Gm46565	grey	grey	0.00893480961218114	-0.0429946838580886	-0.0137787938128856	-0.0109745902826869	0.00440085082199111	0.00679300829498291	-0.0405797240405299
B130034C11Rik	M3	turquoise	-0.0129649349626803	-0.0444486869840321	-0.0583775188624461	0.0325845608967969	0.0547936952452088	0.00951347748385722	0.0205131341339936
Gm50143	M1	blue	-0.0848204341643766	-0.0797702451360766	0.0509965158221989	0.0518568665428157	0.0773116958781259	-0.0262554840727127	0.0147779779829773
Rnf122	M4	brown	0.00219672273443473	0.0487390944791235	0.0050616953900686	0.0641343515034805	0.00290391414091782	0.111706128919765	0.147166410664379
Cep290	grey	grey	-0.0471502478426999	-0.0708408250998215	-0.109631415426063	0.0437229576584945	0.0691358999513493	0.0302392921465505	0.0209380364161809
Ptger4	M1	blue	-0.0345373615706193	0.021755813312828	0.0369660859198785	0.0828602962323454	-0.0201625993102331	0.016202719673129	0.080326162110446
Clp1	M5	green	-0.0733851249800769	-0.036558234238068	-0.0732234017490275	0.105869311359205	0.0843512359779663	0.118623990242566	0.0988107500208527
Gdpd3	M1	blue	-0.489809080567119	-0.476023697531891	0.0358014603385244	0.380153591162035	0.453418592426881	-0.0524066488014689	0.143530066992831
Ier5l	M3	turquoise	0.067370293946478	-0.0193167045595873	-0.179566608865017	-0.0152402805352684	-0.00915613603992951	0.272643395514749	0.135884890140489
Gm26885	M6	red	-0.100143772392527	-0.0249589510108653	0.0577876439577246	0.105127539038798	0.034664950052717	0.0717201527577081	0.172492117873017
Flnc	grey	grey	0.0618950764983878	0.0884156908657682	0.0639906990524879	-0.0820170244320499	-0.0919251882705897	0.0230089816325938	0.0743573690712568
Gm12022	M4	brown	-0.151047762584138	-0.0690914721576053	0.0311010239729963	0.14940562081035	0.116861114536757	0.0343948597871194	0.101885118336738
Mxra8	M1	blue	-0.724904288583832	-0.509371660643187	0.184911067999484	0.623276165393383	0.539418119229863	0.014141017832842	0.340429604489828
Pde4b	M3	turquoise	0.0679571983178134	-0.0248302016676469	-0.289594238753921	0.0816187310736782	-0.00679379673713993	0.324613546180026	0.188638321164567
Gbp9	M3	turquoise	0.127477028299675	0.00586374330071205	-0.174946854292575	-0.101033462250838	-0.0889353562790911	0.0698513200039118	-0.0589144588018257
Cldn10	M1	blue	-0.0693700884850343	-0.055009582694434	0.0430333842413267	0.0398869361656823	0.0424296462189052	-0.0539104802175686	0.00936487847589359
Dhh	M3	turquoise	0.212491980861309	0.159597503991533	-0.129262158777768	-0.105356499372068	-0.266991573083658	0.0894276352068255	-0.0359564742360664
Abcg2	M3	turquoise	0.265227890821428	0.15333865241144	-0.162155679819046	-0.24065273514781	-0.214549927888949	-0.0425820375754042	-0.192596894215163
Adgrg3	M5	green	0.199493733063701	0.190234744380209	0.151353104982865	-0.31943742574239	-0.242551983480517	-0.0404208029374171	-0.0720736466382539
Nav2	M1	blue	-0.226022078694862	-0.0555795274583913	0.0811939791107774	0.218867371920859	0.173681365703744	-0.0187684921111959	0.136822251405736
Angpt1	M1	blue	-0.59954378267781	-0.393127654718981	0.1597233315081	0.490020232964914	0.505209966712309	-0.0333136717220146	0.292296344049177
Gm16310	M6	red	-0.0900382520117732	-0.0342936606732953	-0.0287826722796047	0.114161356486393	0.0654415740212922	0.089098765013071	0.147934140930375
Lilr4b	M3	turquoise	0.0251165731143403	-0.0433219113430066	-0.0604793685628546	-0.00277849327207811	-0.0196866190708743	0.0425541436805462	0.0192579821583419
Fam71a	M5	green	-0.0908581400831992	0.0206045776211986	-0.137347194177995	0.219091436684779	0.117598841785842	0.362838389935793	0.338400963856932
Col6a3	M1	blue	-0.517174103709768	-0.316171948479703	0.18478308330875	0.442604255809041	0.424791087815548	-0.0373001823323673	0.243704008271335
Dnajb9	M6	red	-0.133877053177143	-0.11218254150464	-0.133248126434849	0.233507468205843	0.180649248684763	0.377974876200656	0.428096480145892
Ldlr	M6	red	-0.239701078538529	-0.103748828802795	0.0484256905245719	0.261510338530976	0.208551166659374	0.0487764604032558	0.197339096220555
Calcrl	M3	turquoise	0.107859504736275	-0.107367869743842	-0.631076235811666	0.0119539934443775	0.0795744688476348	0.192334484105779	-0.0964418172272001
Plk3	M5	green	0.0987231993887772	0.042857667106398	-0.179219005230519	0.0478207507729157	-0.0371137899685029	0.340244155180743	0.175158384420411
Cdc42ep3	M3	turquoise	0.179905121003101	0.143993911451582	-0.0835438216743184	-0.0983405982658574	-0.234927475964528	0.108465571870718	0.00976763645197361
Grp	M3	turquoise	-0.0355646677132019	-0.0738178903155865	-0.140745219771827	0.0728835841409649	0.0943578605847152	0.0669786740699027	0.032479935125366
Cemip2	M3	turquoise	0.195236804744293	-0.000631371477079443	-0.551128221152695	-0.0531288472703877	-0.0701208673252259	0.3274643514071	0.00881391993807477
Hspb7	M1	blue	-0.189382506075509	-0.0984182965589769	0.0798951775352739	0.169414290342261	0.111486766049676	0.00703616829815865	0.116053465537005
Nfkbia	M5	green	0.0412255142440525	-0.0401543530241224	-0.44322223061848	0.187489089934211	0.0345866154142548	0.695980537925596	0.418985095277267
Hey2	grey	grey	0.0969298585945169	0.104729518267403	-0.00548680450195456	-0.0426394490751279	-0.170971786599146	0.0158515674689901	-0.0234533730482817
Map1b	M2	yellow	0.24429617881493	0.225510966454636	-0.00462449625391517	-0.246113792672363	-0.260600257710411	0.0169164804899485	-0.0992415477664539
Hilpda	M3	turquoise	-0.078734499894475	-0.122744071972868	-0.264295023431781	0.118882433735612	0.157906640990855	0.0716827898445628	0.0196583993793241
Gm44751	M3	turquoise	-0.0256743752682307	0.0147205553243684	-0.058539606015439	0.0507977067048683	0.0678147099094892	-0.0148026667468117	0.0200327462499184
Olfr889	M2	yellow	0.0388589941912716	0.042957977993508	-0.00856452212602464	-0.00422260299430623	-0.0243001875326186	0.0480883606193294	0.0346481116261377
Vpreb1	grey	grey	0.0231806964060389	0.0387208074593283	0.0224745691123502	-0.0599581702638072	-0.0635482065033065	-0.0280602707299777	-0.0293358841227295
Hc	M1	blue	-0.0200059002234495	-0.000202382449473146	-0.0018445012750159	0.0201135977021165	0.0226858410620052	0.00167536149239106	0.0172057841972786
Phlda2	M3	turquoise	0.0392892179737676	0.0467762510681287	-0.00340177770123261	-0.00170481015015064	-0.0701064027871597	0.035773364601122	0.0288413523212025
Gm805	M3	turquoise	-0.0156376343626245	-4.66568731842142e-05	-0.0543286312731438	0.0296921045633317	0.0577887589148248	0.0241993673460107	0.0229703972515937
Ccnl1	M5	green	-0.101591285186081	-0.0987138176876568	-0.193273792595914	0.245662714638031	0.0978429937449121	0.630168342381678	0.496796039345742
Calml4	grey	grey	0.192395718185628	0.170211756301406	-0.116793489085357	-0.108070076563901	-0.259658498426164	0.0567035584914068	-0.0326286427530945
Cdkn2b	grey	grey	-0.0829630344355811	-0.10376350430921	0.0139689559013754	0.0559629664060778	0.110155686471318	-0.0523206667380794	-0.0291053328456849
Sost	grey	grey	0.0863749227247731	0.0825844807249924	-0.00979476165223944	-0.0575213239469833	-0.121018855404939	0.0117946393484191	-0.0482691443312596
Lacc1	grey	grey	-0.0697810458308617	-0.0417573478714615	-0.0229781826376038	0.0515617947166003	0.0677196626424303	-0.0286497760573066	0.0268187204081258
Ttll3	M4	brown	-0.0688488500527141	-0.00685596510413341	0.00800544945230006	0.0766653444141622	0.0417687700905765	0.0746001185962929	0.103639556647653
Pot1b	M6	red	-0.0143051280526977	-0.0540059348277008	-0.0237505064375794	-0.0189648818073471	0.00556056354889981	-0.056167209601014	-0.0362669046080824
Fcer1g	M3	turquoise	0.0382095611244907	-0.0762082578106296	-0.00940151579266273	-0.0657918238450057	-0.0409116721575409	-0.0297850957449233	-0.0473241415313726
Hist2h3c1	grey	grey	-0.00334635509873189	0.0228728206906859	-0.00352937569095003	-0.0135699668245413	-0.00273945345082145	0.0442935538833954	0.0100118462514289
Scml4	grey	grey	0.0917853319127628	0.032110695603933	0.0301242470029251	-0.160092404419832	-0.0952809612801834	0.023060958343789	0.0154754256875208
Adamts5	M6	red	-0.214184410058431	-0.069305332866714	0.0926518202818189	0.155867522108811	0.15719209577302	-0.00113692239865044	0.174074890249568
Adrb1	M3	turquoise	-0.0279742729143943	-0.146871360305589	-0.320005000443837	0.0875150230259595	0.131073472905659	0.206280762304928	0.052829442908602
Colq	M1	blue	-0.493630136353814	-0.33222857383656	0.171270500990472	0.375944389447473	0.379139980005794	-0.0432992160254595	0.247751907363875
Mgll	M3	turquoise	-0.00187358814065527	-0.114587644652171	-0.110406516097388	-0.0374831670650217	0.0527268754461297	-0.00457631926643149	-0.0526415003554968
Pou3f1	M3	turquoise	0.0148939795026729	-0.00875895246194961	-0.0794065727034586	-0.000719998985614074	0.0268040297697458	0.0843027486556249	0.0751095108189316
Adgrg6	M1	blue	-0.0861168972536311	0.017097403022783	-0.097678084203057	0.148780778827512	0.0731196429807892	0.0622812555140865	0.0783593118100074
Mblac1	grey	grey	0.0273312254060015	0.00669237154260445	-0.0467390025304741	-0.00564540118333079	-0.00848241540309673	-0.0358563371918239	-0.0555840732782624
Sgms2	M1	blue	0.0931074216817101	0.100712456777223	-0.0671591605642116	-0.0419720916196166	-0.128278549292793	0.130944981186274	0.0813053720667516
Sirpa	M2	yellow	0.146313605415599	0.1637350073017	0.0922407960900247	-0.22636620020839	-0.199408305592115	-0.118222460046725	-0.137506323093218
Foxq1	M4	brown	-0.1684435457279	-0.0483492409981296	0.0610993215191713	0.196407272715658	0.114365728604739	0.0610852666224792	0.132772938168552
Cda	M4	brown	0.180716767447783	0.173671996146449	0.175904843715043	-0.305948573530328	-0.202400283994041	-0.14060765464127	-0.155280430119267
Abca8a	M1	blue	-0.470085883759381	-0.273670804230332	0.141140238056752	0.38473680125608	0.36369141410648	-0.0418215440854023	0.199752100761438
Rgs10	grey	grey	-0.179147084480442	-0.228830636691486	-0.0266666818332977	0.155653561943442	0.169117366212525	0.00240500820627306	0.0533967253867486
Tgfb2	M4	brown	0.172885221013005	0.143625284070766	0.0378442755602522	-0.221095407665473	-0.185698471833181	0.0334279201386332	-0.0138713973551238
Sema3a	M2	yellow	0.186848039054836	0.196455093119177	0.187875662878066	-0.325078731432707	-0.243475827132535	-0.124620252399543	-0.122784014031851
Nfat5	M5	green	0.0988727909841459	0.0698287876400097	-0.0570632929575758	-0.10005510365098	-0.0466373430002237	0.221681931049079	0.167407693442296
Nox4	M1	blue	-0.52269561619182	-0.350085917061425	0.176815822824911	0.430147199470609	0.423950556590831	-0.0564004272817257	0.243723063635695
Nfkbie	grey	grey	0.0749754766803048	0.0306842215075245	-0.0507727687443469	-0.0254457308239993	-0.0722568774227543	0.0825905831432907	0.0121396092216353
Gm19461	M1	blue	-0.140766375222627	-0.129134297055981	0.0578392030930454	0.0582975060925211	0.0704337734691634	-0.0559221716869368	0.0104730834401025
Gucy1a1	M1	blue	-0.140490197149742	-0.114121450686824	0.0917534604169375	0.0567268583046864	0.0465236095730674	-0.0786948023095797	0.0465541412084549
Adamtsl2	M1	blue	-0.410490442047599	-0.263553267429716	0.0900812344993378	0.323957465885979	0.347748078405392	-0.0126452280872535	0.162589021106821
Pdgfrl	M1	blue	-0.180642807187495	-0.0778637187764724	0.121597573838637	0.16091347799387	0.117513377186316	-0.0124029356347933	0.0817133000030342
Ttyh1	grey	grey	0.000367067463481394	-0.0165146693366329	0.0869581712405862	-0.0792229707924078	-0.0290848063951104	-0.0776425188166754	-0.067871517891514
Ifit1	M3	turquoise	-0.00261604506979778	-0.0144642649611293	-0.108226607915414	0.00913407926692868	0.0385195304766781	0.0093080110105322	-0.0541014342165514
Ier5	M5	green	-0.179218543758783	-0.150585222621626	-0.180148600960948	0.306872629304555	0.171542091736505	0.51417851184914	0.425211466966057
Efnb2	M3	turquoise	0.0721749898459066	-0.0730300002186687	-0.307802004415877	-0.0160838880473463	0.0154646666262817	0.129345511880187	-0.0236634532544646
Casp4	M5	green	0.100454116380753	0.0943018233254415	-0.126030484516966	-0.0164981757067322	-0.0621060373548626	0.28662442065324	0.109780654559528
Pcp4l1	M3	turquoise	0.169119610326781	0.0658944553626873	-0.179508153790458	-0.168111327509593	-0.0955773686013578	0.0158674759203953	-0.12991076538212
BC028528	M3	turquoise	-0.134642742870181	-0.277132512930876	-0.550564745198593	0.227284010728093	0.302191382154335	0.248419356230541	0.0392255064487861
Sox7	M3	turquoise	0.0984813833771837	0.0160222353056901	-0.382040397774593	0.0353216169334499	0.027941067861769	0.388139957255976	0.173488677372129
Gm9889	M3	turquoise	0.0503901590395541	-0.0710129106822917	-0.187243200756859	0.0165191387695462	-0.014704888835318	0.187435061905152	0.0898213205841293
Lbh	M1	blue	-0.639801133158607	-0.400498861715124	0.186641596650692	0.48310706607826	0.512704375134689	-0.0612832425944185	0.253806543026957
Taf7	M5	green	-0.0670562998079326	-0.0494419062511059	-0.2116717081177	0.190888491875696	0.151574279493986	0.420162445908858	0.28506335201123
Gm11730	M3	turquoise	0.0391195947132383	-0.0246897495114948	-0.13709564069155	-0.0250871813665775	-0.0227605374021629	-0.0111705035498528	-0.074439654910804
Nid2	M2	yellow	0.104550094660408	0.0784117566303352	0.062445118771117	-0.178736053445698	-0.132522308929503	-0.0036770455186249	-0.0403714662808454
Dhx34	grey	grey	0.0382962207393203	0.0577061997311496	-0.0499778238985675	-0.0195860167737731	-0.0204929966328535	0.0601191921375134	0.0377035374914946
C7	M1	blue	-0.476586973933377	-0.268687684874616	0.152600090559024	0.375362103360494	0.400852226827185	0.0153396263881607	0.249419568428326
Ccdc85a	M3	turquoise	-0.0990048299335877	-0.222343992181444	-0.344177995810128	0.152545483846219	0.236712145714897	0.172101448393728	0.0584485403058938
Enpp2	grey	grey	0.0287719877189115	-0.0430205078354	-0.0437794625599043	-0.0140338725220383	-0.00318466563132811	0.0362555054159571	-0.00635269386931856
Myo10	M3	turquoise	-0.274613210489927	-0.325548622636034	-0.23598817342044	0.281578773720106	0.391369406231367	0.108698132828281	0.148150851811232
Tmcc2	M3	turquoise	-0.0685138380705523	-0.163630998857066	-0.251368864163625	0.0767724809555579	0.198813699014029	0.0580829948170911	-0.00548826188025599
Myh14	M2	yellow	-0.190509231375604	-0.352701938942971	0.0243436183402258	0.106391574884308	0.171709645070559	-0.0691351824320858	0.00602339124993712
Hhip	grey	grey	0.0163778508097612	-0.00157538806773109	-0.047865130024204	-0.0277404583028311	0.0138683668608347	0.00892670706368369	0.0269472300438075
Sulf2	grey	grey	0.221881476320614	0.201255050255841	-0.0178076364026006	-0.185722966432957	-0.281601894829724	0.0275445456722143	-0.0580680927695448
4930589L23Rik	M3	turquoise	-0.0136050927099406	-0.0754863992131322	-0.0734136529501977	0.0301833531533096	0.0512106377017636	0.0140418788527609	-0.0208497451535711
Selenok-ps1	grey	grey	-0.0547930217927879	-0.027134594779227	-0.0181204801221608	0.0717227044496397	0.0733922593924619	0.0885023206046126	0.0879312874900199
Ppnr	M4	brown	-0.0413561154831851	0.0139098693716258	0.0666535634938567	0.070994244512328	0.00825914983614314	0.0228960287819693	0.0751357989884391
Topors	M5	green	-0.0307413592708952	-0.0224220766475413	-0.123944447874102	0.112052601126764	0.0655423217352205	0.285942905245049	0.215072718021303
Odc1	M5	green	0.0639165294227743	0.0196656161499948	-0.142318493161249	0.0509854634062405	-0.0156792523876564	0.430432609413272	0.297809147447797
Slc1a5	M4	brown	-0.342545888499827	-0.1561979592659	0.0674544476319861	0.404418399547796	0.303719755756319	0.119787777290445	0.309467193721478
Prag1	M3	turquoise	0.120651492010215	0.0289607393318118	-0.0533406499048583	-0.124533966111571	-0.0973015821997131	0.0824133621827157	0.00160956044615945
Cadm1	M3	turquoise	-0.0962215454343871	-0.141314822166334	-0.251832796436011	0.128612682912244	0.177377762103404	0.0870818343240319	0.0192385474654615
Adamts15	grey	grey	-0.423669936912808	-0.309196120355196	0.0948826078346531	0.327866777881445	0.403291830486462	-0.0676709102770666	0.153274082076959
Cmip	M3	turquoise	0.232088259219862	0.143106687765306	-0.212578862936406	-0.117403116813357	-0.279244308510232	0.177803816033502	0.0187565105548266
Fendrr	M3	turquoise	-0.0202078917647796	-0.152108275473858	-0.399950521451217	0.119050121314012	0.178495050507523	0.228848241735754	0.0696598789873008
Adgrl4	M3	turquoise	0.186262691462279	-0.0132252799448068	-0.619695323210507	-0.0204342476455384	0.0199746213637672	0.26803443925483	-0.0277071854430396
Bmp3	M1	blue	-0.38530281435708	-0.235470480528099	0.113055747552831	0.282362135119999	0.316954711913867	-0.0771922473079505	0.0925186947542807
Pmf1	grey	grey	-0.0214393548273682	0.0347622041176209	0.0205079683921235	0.0418709948545403	-0.0112278721460853	-0.00531226815485802	0.0145997775827658
Runx1	M1	blue	-0.154901394756854	-0.107613692830589	0.0542963829843576	0.122857101308584	0.119404799736125	-0.012611602234135	0.121906088880269
C730034F03Rik	M3	turquoise	-0.114421211817701	-0.0362400390528378	-0.0124073506768064	0.0985059918130112	0.111904132124893	-0.00170533204538173	0.0517438879508884
Slit2	M1	blue	-0.473217677844053	-0.287408889489791	0.123106110615052	0.369094730127753	0.401817423504484	-0.00747382022708342	0.235814909744365
Dipk1a	M1	blue	-0.00571413681948611	-0.00573718169706114	-0.0664753144157604	0.0166360607398867	-0.0307302149559158	-0.0226635387318874	-0.0161926428203996
Fam107a	M3	turquoise	0.296513080012301	0.197148743233903	-0.298077611682734	-0.116290675390772	-0.246514273015863	0.23644065454757	0.00873776876127861
Cass4	M1	blue	-0.160332022539397	-0.116826498530923	0.0587963729868698	0.12285424879151	0.139458660110335	-0.0335383095120873	0.0534529274206589
Lmna	M6	red	-0.190376720215331	-0.128303448556536	-0.022457232934361	0.197314149553687	0.0622496930934041	0.288000357631482	0.325500385771782
Fjx1	M6	red	-0.0347104944015687	-0.0167147879832837	-0.00408786966296242	0.0433296743980271	0.0278370537101974	0.0752951872174181	0.0448108425948172
Myh11	grey	grey	-0.0161102907151518	-0.127004039005304	-0.0955970270956956	-0.0259981822144457	0.0702688720374817	-0.000193522821530527	-0.00789841758080081
Ccdc125	grey	grey	0.067290956841563	0.0165203334984593	-0.0541203781813151	-0.0543616404461156	-0.0738586486251591	-0.0163216643424676	-0.07581347412368
Smim3	grey	grey	-0.0759194576598152	-0.0668484087430788	0.0116078100046296	0.103093149018217	-0.00042440278421894	0.100876875202917	0.117622956735287
Smim4	M1	blue	-0.453350828998251	-0.346901865871892	0.113115046402494	0.346408008950125	0.361811515590248	-0.0491995276375323	0.167256385618193
B230369F24Rik	M4	brown	-0.138691944493277	-0.0920752695735509	0.0366658463880223	0.171565397495444	0.133041009682409	0.0710830025170617	0.181427941197129
AI429214	M4	brown	-0.13319583656166	-0.0552919870292836	0.106529120586607	0.149800078018855	0.103701988791115	0.0122394262944234	0.129477458884654
Slc26a10	M5	green	-0.0422671709348183	-0.0419377132159854	-0.0910068429574869	0.0371158356146655	0.0766206587776262	0.069111839388427	-0.00723711177075974
Scara3	grey	grey	0.0963198513695927	0.0748192270987675	-0.0263504405244345	-0.0483968789233435	-0.155794725338172	0.045920529902511	-0.0378789013839004
Iqce	grey	grey	-0.0401328443497853	-0.00177737012573938	-0.0329766632703453	0.0460009002681847	0.0463972804395093	0.00479981178466297	0.0376928749441019
Ddx60	grey	grey	0.0644324623927014	0.0636858374535281	-0.00652269714800678	-0.0224347146306696	-0.0453377581014143	0.05488681212924	0.0540093434080361
Spa17	M1	blue	-0.0309615678438855	-0.0383199836696543	0.0114765329500553	-0.00588762119244167	0.00751244300950486	-0.0141727348729027	-0.00456086096501707
Rilp	M3	turquoise	0.0402293591331992	-0.0335968801507659	-0.096135766272252	-0.0160820654400788	-0.0118734335181589	0.0465121759840388	-0.040647479138985
Prkg2	M1	blue	-0.393395576745881	-0.277367528341166	0.141057007195865	0.333986441573769	0.326165529607613	-0.0238866884202544	0.198825450278109
Mme	M1	blue	-0.561942530821125	-0.377499970304413	0.171768446408869	0.437681357387562	0.463074057656131	-0.0532692034465007	0.22113901259063
Gpc3	M1	blue	-0.542106662524052	-0.402653201277028	0.136471881216095	0.426349370945332	0.437868209331715	-0.0582816752446296	0.197667894958922
Rasgrp3	M3	turquoise	-0.000738526781609254	-0.0898710994985712	-0.205547172292291	-0.00317592041097117	0.0868937357303279	0.170537864023398	0.0687995583376673
Mctp1	M3	turquoise	0.0996698830740591	0.03659032786963	-0.227050843793383	-0.0110461344071516	-0.0316401263867254	0.133655782589349	-0.0190731714655122
Gata3	M3	turquoise	0.0501405141807759	0.0110380305490943	-0.219310878468833	0.0225293987475315	0.0237511128811681	0.064372688616411	-0.00909148565202068
Adgrf5	M3	turquoise	-0.0946801766592657	-0.305911275384116	-0.523698799480241	0.147135842445937	0.279874757069467	0.172482645082818	0.024122027451968
Wif1	M3	turquoise	-0.0985237004580092	-0.178377153705814	-0.252501759633206	0.118818570068832	0.164646124175662	0.120484115480706	0.026329339016999
Tmem100	M3	turquoise	-0.333724652607008	-0.432875153254658	-0.390114812996695	0.342873734643008	0.433888069243407	0.127227449131043	0.0738279226444993
Gm42941	M3	turquoise	-0.00076536156071152	0.0461249576600235	-0.0720326587409453	0.0239703648649732	0.0376297941132949	0.0459671841205581	0.0226391034615094
Klhl4	M3	turquoise	0.215448526614818	0.202865162283156	0.112731339754767	-0.329153898557373	-0.268320260106316	-0.136699376670262	-0.173690031904222
Hsp90aa1	M5	green	-0.240494291352076	-0.228771778607499	-0.134038074168022	0.363110861806759	0.271872465068484	0.488655975930345	0.496378809135352
Nxn	grey	grey	0.265444054159015	0.244132704518015	0.0624231127760937	-0.309348766976346	-0.409349898495814	-0.0404077485782391	-0.140128118266817
Ace	M3	turquoise	0.00276563675660968	-0.173551082774608	-0.611258146308821	0.147556441310067	0.166689100928868	0.302902103070476	0.0655050380146367
Baiap2	M5	green	0.0897736868650229	0.0167540774335369	-0.333691345407024	0.048345795681664	0.0139558535443817	0.399925071184007	0.19674482944889
Rlim	M3	turquoise	-0.00777245294126623	-0.0403967578219777	-0.231542956399249	0.0855592668505945	0.0668042581887455	0.299494548008193	0.198324821016773
Rasgrf2	M3	turquoise	0.126791651826682	0.0529445910647067	-0.0562660130820918	-0.0982048351307319	-0.18791369492183	0.0360812034721385	-0.00581571152501849
Cdkn2c	M1	blue	-0.410570437671405	-0.326668533528969	0.0546626244994705	0.319781799785389	0.338412809151961	-0.0257705463067801	0.146099749013157
Atp2a3	M3	turquoise	0.136230065836623	0.0944093731270642	-0.208872967478354	-0.0302654378347438	-0.182177758778685	0.129500404898815	0.024587144024176
Rnd3	M5	green	-0.21292975746189	-0.106065976746682	-0.0435096709123214	0.282508603662623	0.21463015586559	0.246028095057916	0.290283555524037
Xkr4	grey	grey	-0.0740702457136432	0.0425256926793339	0.0433543224123859	0.0561856481815959	0.0564808410189024	-0.0147991621123959	0.0459907754947079
Msc	grey	grey	-0.0688872875889365	-0.0293827548782279	0.0220448471688963	0.0722953543248554	0.0509740322462923	0.0298838459726741	0.0441793603565677
Bard1	M1	blue	0.0148823071642983	0.0306764923981322	-0.0252944155826358	-0.0111622220675207	-0.0537665037163901	-0.0241091307602609	-0.0482107097777999
Sgpp2	grey	grey	-0.0284964852164281	-0.0736169527779839	-0.0216192460101819	0.0186713764375264	0.0818545208567689	-0.0466522857260836	-0.0445756823105257
Lefty2	M4	brown	-0.0569623145080302	-0.0277856589010529	0.0205617698267581	0.0668206986933581	0.0283369425615317	0.0341790736810136	0.0726412487194897
Nkx2-4	grey	grey	0.0240779866704393	0.0180033570801016	-0.0629227760242582	-0.00752938103082735	-0.0283386427440116	0.0362496842201773	0.0147279608918761
Gm15441	grey	grey	0.0307768597432239	0.050126705019327	0.0421118685727802	-0.0461983400869815	0.0109055319747636	-0.0152880102242098	-0.0214233665228583
Bcl2l15	M1	blue	0.0068624841764996	0.0332171591355601	0.0592057614446483	-0.0610232394634747	-0.0399541632258579	-0.0321109245634452	0.0164869585701769
Abca4	M3	turquoise	0.0285910310677814	0.0519186727799632	-0.0491378065949722	0.00235349914370243	-0.0360587269223211	0.0529508481680686	0.0556472921683925
Lrguk	M1	blue	-0.0875221169331366	-0.0453817364312939	0.0607271141302799	0.0402292086528851	0.0802431212758099	-0.0487568072863022	0.011139929005676
A730020E08Rik	grey	grey	-0.00753409375456682	0.0369541444810378	-0.0345581162330813	0.0444523030923258	0.0131328764189368	0.0577941577259681	0.0565228555904262
Homer2	M3	turquoise	-0.00436753217323494	-0.0242172689671916	-0.0145347880533993	0.0143896230005074	0.0101141727972517	-0.0338588022667212	0.00288451902538671
Gm45187	M6	red	-0.0534343080032766	0.0199686022802114	0.0474423994565924	0.0727225938043405	0.0519642311238265	0.0324017801238943	0.0821758951389739
Olfr482	grey	grey	-0.00495928791453135	-0.0520673428261024	-0.0397031969640243	0.022389688280572	-0.00515937800191527	0.0326931818788516	-0.00937418431736578
Nkx6-3	M3	turquoise	-0.0363713349516292	0.00462307594795284	-0.0134781208279602	0.0657555672825815	0.0554877673287971	0.0314092963919107	0.0472901663564862
Il34	grey	grey	-0.0547686465475442	0.00403484440046594	0.0604043057577925	0.0737426913144142	0.0347321291732418	0.0285524598361928	0.0653551706855389
Gm32856	grey	grey	-0.021529507705962	-0.00378967321797564	-0.0317693281318952	0.0296758307156286	0.0456440038431631	0.0354500406732642	0.0168532350193598
Gm47079	M3	turquoise	-0.0169827102225475	0.0111948997440606	-0.0236353981312835	0.021563765193968	0.0119645398793711	0.0388367007183455	0.0217599168678012
4930542C12Rik	M5	green	-0.031650275913912	0.00984634701775585	-0.0328220886209988	0.0463836938721597	0.0673027658915208	0.0708011099409254	0.0318170280416698
Apc2	M3	turquoise	-0.037185083060479	2.98330154892043e-05	-0.0123683263916507	0.048973325923965	0.0482692675315467	0.0101547364529883	0.0323507340035094
2310058D17Rik	M4	brown	-0.0213665402826598	-0.0182699602443245	0.0414682263172985	0.0151020907286891	0.0230891000694192	0.00667136615083014	0.0248382386882033
2900045O20Rik	M2	yellow	0.00438721660765859	0.00289934147751608	0.0243968674843985	-0.0271763913800585	-0.0555763421096656	-0.0824665674961751	-0.0760282021382861
Ly6k	M5	green	-0.00182821957448174	0.0416828858373753	-0.0185169069008366	0.0468611908345902	-0.00784204550036965	0.0744658087723423	0.0549495662548036
Apol6	M2	yellow	-0.0566235543584784	-0.088027103716973	0.0274832077640872	0.0313971602064015	0.0678302492967261	-0.0497623726302289	0.0045610802654694
Tekt5	grey	grey	-0.020148860311393	-0.0737488097200214	-0.0341415963568865	0.016421871583936	0.0320295060691422	-0.00436756754988938	-0.0153062294137314
Smco1	M5	green	-0.0709132641803836	-0.0641472303794335	-0.000122862718547004	0.0607646248441316	0.0669812528069669	0.0756052111146449	0.101035464969994
Dppa2	M3	turquoise	-0.0495600830419672	-0.0223443763715162	-0.0127225535984765	0.0597131443326982	0.0490192740894137	0.00536250223991282	0.0412570571288765
Ms4a2	grey	grey	0.019241136581832	-0.0273679861649029	-0.0423919652401725	0.00905851991262726	-0.0148235047351951	0.0563037500050604	0.0444283585980329
1700122C19Rik	M3	turquoise	-0.0365673722424985	-0.000110636712935601	-0.0115260193654397	0.0294702294439586	0.018969503128101	-0.00336575899160555	0.0215608787747978
Gm6268	M4	brown	-0.0605519374221318	-0.0413141724072677	0.0466019557493043	0.0852401944002149	0.0623704123822211	0.0123164984410041	0.0523428477659995
5430427O19Rik	M4	brown	-0.0860858844603345	0.00594495166233871	0.0771759966775458	0.0738622205468937	0.0580322484909649	0.00348461970747044	0.0474197569452839
Zdhhc15	M1	blue	-0.0337931816550583	0.0297014528046935	0.0407394540988656	0.0328231354229638	0.0194272334270064	-0.0413827432847691	0.00913722461952302
Btg2	M4	brown	-0.545691031363161	-0.342353587819752	0.0252615485909222	0.647765815068882	0.496846693214795	0.386139568102214	0.602611659978044
Adarb1	M1	blue	-0.439263274598028	-0.263252333335576	0.132311050928989	0.365495022621314	0.381332570065052	-0.0128740274689542	0.241917395127865
Ms4a4d	M4	brown	-0.468718276438242	-0.277120337568926	0.107784348812209	0.456267388875481	0.408446615106746	-0.00300106462370003	0.231514050635636
Loxl1	M1	blue	-0.581884070186272	-0.326616280679181	0.210989065717735	0.468164927610945	0.471996375377008	-0.0524826877661894	0.281246365227015
Cd9	M3	turquoise	0.586469883569826	0.317024533170252	-0.545657071785229	-0.431030664754239	-0.460129276712395	0.201242875533254	-0.261309962410837
Ankrd33b	M3	turquoise	0.0359761937737616	-0.120439713650243	-0.420054491087685	0.0831962149056969	0.12319579409497	0.292478552190278	0.0958301383620383
Col18a1	M1	blue	-0.0139608865809227	0.00811057075655433	0.0969886578491921	-0.0693468827985315	-0.0882132201426753	-0.0494363252289429	-0.0168961020522455
Eps8	M2	yellow	0.162189687374297	0.110203338907726	-0.123207869066379	-0.0777064462334272	-0.117843464107775	0.0863179692352995	-0.0373388859054269
Fgf7	grey	grey	-0.412789007059417	-0.291182638628079	0.0726536906842571	0.351915397398915	0.42118513490544	-0.00556885268166318	0.211901313859961
Hspa2	M1	blue	-0.142887475337768	-0.121935235805865	0.00777489640802852	0.207998930879378	0.126051010632094	0.2476040360908	0.31394885500728
Sftpa1	M1	blue	-0.0525517927346087	-0.0783609119824375	0.0218044327555963	0.0177189100531672	0.0188196468906406	-0.0229834390603997	0.0122910018285716
Pard6g	grey	grey	0.0430406768730348	0.0508312985523572	0.179310744402512	-0.23457480872894	-0.098890144075713	-0.138248321002612	-0.110662761668611
Ccnd2	grey	grey	0.100924096149816	0.0118712093587339	-0.105984879712566	-0.0775196544585128	-0.151332290587431	0.0428160182924534	-0.063808357461382
Hmgn3	M2	yellow	0.131797183726324	0.13101896153655	0.00919592380948757	-0.164183851597337	-0.171077850435393	-0.127684451063182	-0.167160369282054
Pitpnc1	M3	turquoise	-0.0853938270519472	-0.142357897982653	-0.328411298444358	0.104900097602686	0.214053866690609	0.155760156074364	0.0653454683814536
Sox18	M3	turquoise	0.145631335716221	0.0229831956439883	-0.30960753086608	-0.0662901234131155	-0.0593825481615852	0.0332013856937475	-0.140575068377335
Arl4d	M3	turquoise	0.072894346805253	-0.0649066580806405	-0.466002900584371	0.0647037206392086	0.095621510024025	0.277117015810229	0.0773312448734881
Gm14636	grey	grey	-0.033734886290929	0.0121658901429831	-0.0662831709045165	0.106436087808223	0.0506816477151987	0.159493013548343	0.149733162588581
Golim4	M1	blue	0.137951167956226	0.0734544994473917	-0.108277821779101	-0.112921128402236	-0.168637564256643	-0.0332418506160309	-0.122702607028806
Plaur	M3	turquoise	0.0970056515781963	-0.0554966402254132	-0.327272417239911	-0.0309577958446791	0.0181420642846688	0.248072852886407	0.0570223040538138
Emp3	M1	blue	-0.172435619835631	-0.0960157533552167	-0.0714493338926285	0.245045197457505	0.0509066336954583	0.058477135246421	0.120022346346355
Etv1	M1	blue	-0.354457286208315	-0.222025023065582	0.134840990951491	0.251564639839283	0.284620888898333	-0.0592812733066451	0.146465760085631
Myo1b	M1	blue	-0.53255738528402	-0.397894934054107	0.178697747002911	0.397928791779714	0.453474777662527	-0.0762361186966205	0.22434486012295
Tgif1	M6	red	0.149341147909128	0.155563599628432	-0.0478920280756737	-0.0470666221743034	-0.160568672857507	0.193447897090254	0.12839287046716
Casz1	M3	turquoise	-0.0409429029475197	-0.190223645346615	-0.453151554928453	0.132149961463819	0.213547341046468	0.272841352008505	0.0977167048719494
Msx1	M3	turquoise	0.0649196647325181	0.0444030911665192	-0.168570286091208	-0.00335195866303144	-0.0747472184484717	0.16403793450112	0.0726566557241331
Fndc5	M1	blue	-0.127663242544417	-0.0683343243178595	0.072465657496894	0.110656785149866	0.0893895033088482	0.0124095708280527	0.0972550389148554
Ecrg4	M4	brown	0.0261571591440188	0.0380389182268288	0.0200795748580825	-0.0322753760108082	-0.0623877948518299	-0.0295622486461245	-0.0292739999662439
Tnfaip8l1	M1	blue	0.199820033444458	0.176490117913551	0.108326252983741	-0.294696958271083	-0.220805746046226	-0.127250825070884	-0.185407414277191
1700017B05Rik	M3	turquoise	0.0130164456981367	-0.0275714685138813	-0.0448163600797854	0.0129371307166712	0.0126022654088174	0.0202474201681066	0.0183246811289336
Lpgat1	M1	blue	-0.412740511875257	-0.275302493113595	0.122826038468182	0.308763505204557	0.34219680672324	-0.028681691365781	0.160557314874594
Plin2	M1	blue	-0.293300145310104	-0.227313821503	-0.00078549835890438	0.250089819049458	0.280181783942442	-0.00252668722462813	0.138761970869689
Upk3b	M1	blue	-0.0454597787295127	-0.0179009456617387	0.023007292799173	0.0259587594159885	0.0245034748822325	-0.0509276418733137	-0.00129547274642222
Vav3	M3	turquoise	0.0528937203004846	-0.0344267494079194	-0.0731245004439771	-0.100088420953831	-0.0321044694615627	0.00132831492514304	-0.0696839642346736
Csf1	M3	turquoise	0.0511754030137423	-0.0130210105476474	-0.132429992963646	0.03137962002574	-0.0314679688272502	0.190726732388294	0.112055053065203
Adamts9	grey	grey	-0.284048937350574	-0.211617987564095	-0.127401540332816	0.313180326694373	0.363916392369465	0.200173423878033	0.283099577149573
Tekt2	grey	grey	-0.198975292855588	-0.0838248856620781	0.061329764409688	0.182930014728316	0.194523636798929	0.00235657953828071	0.100007769376081
Slfn2	M3	turquoise	0.198575985003789	0.176040655456624	-0.00840074561568214	-0.203264408248222	-0.204304160752471	-0.0687924466551118	-0.154902220827965
Atp1b1	M1	blue	0.00786057623317552	-0.00693608549838657	-0.00461371158612348	0.0155770164108682	-0.0312274637173792	-0.0352371224984146	-0.0234418453833852
Cenpq	grey	grey	-0.0319101321286941	-0.0601216336355187	-0.0265376718853609	0.0440223029439878	0.059300592342137	0.0338686934013276	0.040827153011866
Wnt5a	M1	blue	-0.161825499352967	-0.0628916896774715	0.0722913416182261	0.140213372231796	0.122559968909218	-0.00663707429283191	0.0784496159241426
Gtf3c5	grey	grey	-0.0711242259220086	-0.00887847081137656	0.0218106859036993	0.106756189342057	0.0380272471642251	0.0720883236526515	0.108843523485369
Slc7a10	M1	blue	-0.546054453324942	-0.321422461141999	0.141024302998346	0.416105614870976	0.474025617302207	-0.0831623720239104	0.20926592042843
Neu1	M1	blue	-0.128241097544841	-0.127094691231595	0.0130846536125157	0.0875928234653173	0.12436302050611	-0.0609802265831088	0.0187320405232975
Ednra	M1	blue	-0.561604663376182	-0.320061255434361	0.206711539522838	0.465817128815008	0.484837239619086	-0.0475695352098355	0.293266173755757
Ncald	M3	turquoise	-0.272678188188778	-0.203972740772322	-0.19107165853766	0.28325677117951	0.34994398468916	0.105661459906245	0.171877522426246
Gmfg	M3	turquoise	0.0736929492439928	0.00164544715307227	0.0106429454499665	-0.196675115797683	-0.0311931160333991	-0.0673540841191512	-0.102372320388236
Cfap53	M6	red	-0.102681604097203	-0.0762898466149752	-0.00150003672697472	0.12451558748639	0.0964207448802283	0.0741248696499823	0.146917235892735
Sdcbp2	M3	turquoise	0.0274935507461354	-0.0223704227488723	-0.117189307421176	-0.00959672901668009	-0.0262941240312678	0.0375887403806919	0.000128406476476441
F2rl1	M4	brown	0.145446479432826	0.166669966086438	0.108193852241428	-0.226226973527986	-0.205659043699416	-0.0774087317686442	-0.0645215190920447
Mgst3	grey	grey	0.107436653387839	0.0457485766753051	-0.0913709472631703	-0.0398094012756508	-0.174334231094963	0.00395126946085741	-0.0709004370579103
Gadd45a	M5	green	-0.0220580123592737	-0.0553941964049568	-0.0919629099655274	0.0915845604196498	0.0465775455725408	0.222125598188283	0.169810405401213
Rgs12	M3	turquoise	-0.11197680426594	-0.133465487728038	-0.144657627983712	0.0965906686798715	0.217451079700978	-0.0155559018362033	-0.0159501490301059
Tbx2	M1	blue	-0.557899080510405	-0.398121282931605	0.12717749690131	0.441157322518172	0.509634238313166	-0.0771050477605619	0.222565049055714
Errfi1	M4	brown	-0.453430713612488	-0.261274962737298	0.154357000567908	0.392960687111219	0.310309998469169	0.121742822611666	0.313441252473301
Avpi1	M3	turquoise	0.202901741110526	0.106671883354233	-0.350664003168812	-0.059184141662405	-0.149172735560738	0.228371659431459	0.0271100203992549
Rpgrip1l	M2	yellow	-0.0925570653067318	-0.105639471032004	0.0517281130374359	0.052859043693704	0.0772567405551552	-0.0389331638172994	0.0388341109608966
Pik3c2b	M3	turquoise	0.0670893960207511	0.0547195806770921	-0.0591421205442938	-0.0210025804386457	-0.0877913526020824	0.131059302593512	0.0978025540239208
Tdrkh	M3	turquoise	-0.0319833037838535	-0.0910948881791426	-0.0783514362391578	0.0452292175676489	0.0620516515685636	0.0504435737902173	0.0188223209458457
Fndc7	M4	brown	-0.0896596546802812	-0.0234735703121978	0.0193349753439978	0.164578965875743	0.0986220892714008	0.0879503052555873	0.144387844214262
Abraxas1	M3	turquoise	0.0280552260193348	0.0161592552889877	-0.124857551196164	-0.000842088438629842	0.0192203282143458	0.00513986660906849	-0.0406092387988586
Ccn3	M2	yellow	0.107204887367807	0.131225365718389	0.104902787280241	-0.184121715597344	-0.161155675990634	-0.101655617681824	-0.108317046486385
Lix1	grey	grey	-0.0236937512032148	-0.00567927502823951	0.00162038119170234	0.0214105201516033	0.0114308141583648	-0.0128472581221863	0.0153191664612319
Zfp229	M3	turquoise	-0.0371716955731997	-0.0370617364876028	-0.0273050495152818	0.0100443593105105	0.0522335544988134	-0.0147892018864273	-0.00233840580887221
Pcdhb21	grey	grey	-0.0549491644399838	-0.020997109649084	-0.00871040143919653	0.0669084594993916	0.0544434762711596	0.0433548503247967	0.0761088943500413
Gm14964	M1	blue	-0.166342735570772	-0.0751535073178892	0.0887078640276673	0.105300954087646	0.124633201380845	-0.0311361475834221	0.0624088054763536
Fgfr4	M1	blue	-0.542996439791804	-0.321671161354785	0.187566807033757	0.439540813187013	0.443343220316829	-0.0415474669824202	0.231668093220612
Gm3448	M6	red	-0.0259728110439896	0.00494333180202716	0.00171691692063306	0.0525229201221094	0.0399534075160013	0.103554046783641	0.105632614905967
Clec1b	M2	yellow	-0.0776884412880041	-0.233885642360859	-0.0762663820699516	0.0426178781315692	0.13707366539663	-0.0444792908255517	-0.0531034314318991
Pnmal2	grey	grey	-0.142405616206584	-0.0881198622775706	0.0210210957296334	0.124877071420738	0.203108343995503	-0.000643466030789043	0.0865155747933305
Pamr1	M4	brown	-0.221948337388498	-0.0946442352128821	0.0956244064968258	0.281110938871861	0.191590602064674	0.08739420711168	0.211257591123585
Bmp4	M1	blue	-0.384256598363198	-0.225491885099344	0.0636739651051337	0.396637932858799	0.317778807158877	0.0806427181244923	0.28548289202484
Ripply3	M3	turquoise	0.0569301183385552	-0.0873194180694812	-0.36634613670841	0.0407909024120299	0.0713773695499348	0.13845834963359	-0.056574416671013
Nabp1	M6	red	-0.155098534451632	-0.0881003804417298	-0.00212974951552788	0.188392278128357	0.172331498240724	0.115061488727951	0.231785010187063
BC005561	M3	turquoise	-0.0274171495584629	0.0477313095156754	-0.131114454721619	0.0498942392559071	0.0801714510117919	0.117278050812877	0.0606932456398715
Gm28875	M1	blue	0.109229488915936	0.131747848987915	0.0968682998496051	-0.188632708350098	-0.174190994466287	-0.0470457518539875	-0.0828502438500942
Grem2	M1	blue	-0.362398893223148	-0.265417563593683	0.0400217571050816	0.255465281184436	0.333297909225168	-0.0332317865286762	0.151147880324544
Ccdc18	M2	yellow	0.0409299478661664	0.055073196388302	0.0253509969599056	-0.0799286523746687	-0.0174519714025707	-0.0520063590903673	-0.0224920267295432
Zcwpw1	grey	grey	-0.0625858266474585	-0.0137929863054541	0.0141011072227872	0.0528894776741426	0.0798226634912581	0.00199711211819001	0.0484130413457359
Cd37	M2	yellow	-0.0196449757028745	-0.0755464773429041	-0.0116839439246288	0.0114311233545795	0.00127135552890132	0.0016184683960913	0.0186938980451605
Fam169b	M4	brown	-0.0583989160043122	0.0110520236140727	0.0688639572185651	0.0585267473339157	0.0115312589058734	0.0548150028200272	0.0956533538259622
Obscn	M3	turquoise	-0.00206939210663282	-0.0482937145744126	-0.0464388564015967	0.00804371750618783	0.0347194225771954	-0.016715445339196	-0.0322749151105668
9330162012Rik	grey	grey	-0.017731070626917	-0.00555264102611006	-0.0690394307572322	-0.000524414682845398	0.0206467094281823	0.0142655515872154	-0.0241113514313333
Agtr1a	M2	yellow	-0.0957445588440598	-0.0884291515780962	0.0141997535971836	0.0711741478487369	0.055373682750089	-0.029928064226412	0.00447037313113085
4930452B06Rik	M2	yellow	0.0406377139519816	0.027144580081094	-0.0623889911417616	-0.037893840909886	-0.0304045390849853	-0.00391595403606218	-0.0345513788716155
4931414P19Rik	grey	grey	-0.00618667309301161	-0.00199755604437486	-0.0226934594903923	0.0365359433386573	0.0132817478721721	-0.0113491661380194	-0.00715788927734045
Sfta2	M1	blue	-0.0445534795815377	-0.035343627644383	0.0181645957586276	0.0473317734452478	0.0203628590538849	0.00734660528689843	0.0458518201107315
Gm37233	M3	turquoise	-0.0447948941602429	-0.0333910826778553	-0.032574509318381	0.0500175182398967	0.0596981761244055	0.0576093353750331	0.0387383071638245
Apbb1ip	grey	grey	-0.00601371277182164	-0.0164256776142157	-0.00242134596247399	0.0361206790455178	-0.0247864950185894	0.0275986139882804	0.0433855333188558
Ly75	M3	turquoise	0.0445543752915653	0.0192739618996574	-0.0699778783414146	-0.0206789714377107	-0.0357124240061837	-0.0178731926671586	-0.0529676412436866
Gm13594	M2	yellow	0.0329826977157352	0.0234806668531619	0.0290006832881839	-0.0722011230551234	-0.0553997426064039	-0.00783869783022436	-0.00964315605980975
Gm16685	grey	grey	-0.0607763264942283	-0.0181092343522701	0.0701398669071597	0.0380603787400446	0.0325475117333784	-0.0334105859453876	-0.0084682403386362
Gm43768	M3	turquoise	-0.0125884998733569	0.013398256677846	-0.00782362997317334	0.0288554563905288	0.00187561407511456	0.0654016104461457	0.0609942039113475
9530097N15Rik	grey	grey	-0.0136589385100948	-0.0248600249044553	-0.0275486044271745	0.0301704087956776	0.046608647931864	-0.00173854905528339	0.0349285517978608
C130013H08Rik	grey	grey	-0.0152958841679552	-0.0787140326672911	-0.00503523197662046	0.0273165261549746	0.0365486480339254	0.0836591518442532	0.0533277778813744
Gm12743	M1	blue	0.0103198104725734	0.025792835611964	0.0489553012438128	-0.0244833981852306	-0.0394823718825132	-0.0288689031108394	-0.0365037751634099
Agbl5	M1	blue	0.0226909408419556	0.0300569338980696	0.0204165717441915	-0.00408008004719321	-0.0495800624417532	-0.045851751978688	-0.0651095654981889
Tmem150c	M4	brown	-0.0694339515306969	-0.0164970014999447	0.0290466098760276	0.0990327685847936	0.0641070415606514	0.0563070897862496	0.0856501197780507
Cabp1	grey	grey	-0.00869784976127187	-0.0496933978582321	-0.0297402031459494	0.00451986014747101	0.0305679181792458	0.0257418377383893	0.0338007443188192
4933404O12Rik	M4	brown	-0.0895113480693367	-0.00618634903868081	0.0820278976908944	0.0688037848393484	0.0571587978452042	-0.0475840060835886	0.048039139313794
Vgf	M4	brown	-0.0166374604549952	0.0198900405185892	-0.0046858231941107	0.037783176352681	0.0119416545261546	0.0622747621459868	0.0537246254457875
Klc3	M1	blue	-0.0711771740130381	-0.0898286131007249	0.00969899759039413	0.0380776357392701	0.0564653283984249	-0.0217540143374054	-0.00672286500171615
Cd79a	M3	turquoise	0.0125984616180537	0.0129550589413995	-0.0620763930722516	0.0216916803330094	-0.00176789154693429	0.0883143486486848	0.0727401913324993
Necab2	M1	blue	0.0395155223526164	0.0555465421874087	0.00946368098804409	0.00927867883935422	-0.053360963024677	0.0735845110597051	0.0596069743509763
Panx1	M4	brown	-0.0124251985159307	0.0398192395334456	0.0152060980573885	0.00782674816783691	0.00223426612504752	-0.00864717491254745	-0.0238681859118147
C2cd4b	M4	brown	0.0511318511055532	0.0737138063269009	0.101421497972975	-0.0794832650105629	-0.0743053239153991	-0.0754354765871875	-0.0660259021974885
Gm15892	M4	brown	-0.0708984329737926	-0.000267269570613467	0.0657714794641645	0.0851837113573322	0.0387382433884662	0.0262072431090031	0.0696821160883081
Gsdma	M4	brown	-0.0503444326133444	-0.0132013991309257	0.0438713652574041	0.0621055756867418	0.072787305696724	-0.0222101443268668	0.0403586859603703
Ccdc57	M3	turquoise	-0.0489317807338345	-0.0229692803873595	-0.0256408507680516	0.0500075257671821	0.0842090458662157	0.0292309545016831	0.0155314851370325
4933406C10Rik	M4	brown	-0.028194873016705	-0.0430224021730119	0.0261407320441089	0.0191077524199421	0.0236722674306806	0.069491391102275	0.0336641558233865
Rian	M1	blue	0.0136409624642326	-0.00953238532404873	0.0345641289053727	0.0134436643049348	-0.0685621719172402	0.0247144048135057	0.0423643093530908
Gm46404	M1	blue	-0.0507980854368216	-0.0200437083567192	0.00563951777218439	0.0363734498599999	0.0726218832326963	-0.0443417673001039	-0.0144848880557596
Slc4a8	M5	green	0.0291077549088939	0.0128829043436182	-0.0288171985864551	-0.0327334259289879	-0.0348084810522231	-0.00664889198425961	-0.0192639528468925
Prr18	grey	grey	-0.0567248266167422	-0.01400667058736	-0.0324957618120762	0.0541492129976477	0.0607187444671181	0.00342651648717632	0.0189161691586385
BC051142	M5	green	0.05488272483208	0.0724956617651713	0.0477715682126683	-0.0673176387182185	-0.0553511266382458	0.00705400543973139	-0.00436825167461261
H2-Q2	M1	blue	-0.053427713979039	-0.0932896669668184	0.00756387387365096	0.0423214615254338	0.0510790520702445	-0.0316102309892561	-0.0151544810631824
Gm28529	M5	green	-0.00649671344010608	-0.0921920788115485	-0.0836095277024634	0.0030386878920607	0.00982374768960541	0.0332185174053199	-0.0361411505626655
Greb1l	grey	grey	0.00299800836892552	0.0260641469059759	-0.0491335014196414	0.000731684951017655	-0.00012761968648515	0.0234853723797444	-0.0197088551555786
Gm41760	grey	grey	-0.0410469127061069	-0.0343438971927223	-0.042723065444104	0.052068847297942	0.0878340835815226	0.0231476566503925	0.0308534961241006
Smarca1	M4	brown	-0.0254868401460611	0.0194725224098442	0.0814248469890898	0.0252000139329531	0.01661961835726	-0.0217968307612387	0.0208191959693765
Plp1	grey	grey	-0.0162082098796412	-0.0109598782891089	-0.0166984650963656	0.0317804446733805	0.00758412784491756	0.0297998084234772	0.0459380845700813
S100a9	grey	grey	0.0567634869125414	-0.00202055742033102	-0.0344256978540284	-0.0468033459353808	-0.0251219875351451	0.0244138391278135	-0.0154982113698634
Cgn	M2	yellow	-0.0503335995903922	-0.137914997133832	-0.0168704622881011	0.0342588813796742	0.0498481728418921	0.0186126927085137	0.0246389922023646
Oas1c	grey	grey	0.0182602646901262	-0.0264203725533637	-0.0215150957685727	-0.0135553375082371	-0.0291631186443663	-0.00668912644160989	-0.022293382115184
Lrrc2	grey	grey	-0.0154210966511504	-0.00212100298622989	-0.0418698843154555	0.0460984918913606	0.083737568832293	0.00776723222171212	0.00564482956937262
Fam122b	M2	yellow	0.0338024238414225	0.0268125131774048	-0.00508607076474451	-0.0115917247766593	-0.0289123177687701	0.0148538718020786	-0.00232651394853937
Ifi202b	grey	grey	0.0391705761110078	0.0191687717813721	0.062413761273712	-0.0754406048935775	-0.0232372226618973	-0.0317068619327649	-0.020530275631455
Mapkbp1	grey	grey	-0.0219358405457794	-0.0265484237792187	0.0141065724031858	0.0194083799338642	0.0113959556025245	0.0243422475296426	0.0467422056394886
Gm43387	M1	blue	0.0379610812000656	0.0350653134755068	-0.0594556893344832	-0.0112237500863954	-0.012269229284184	0.043383706742611	0.0230900864677519
Irx3	grey	grey	0.0199822917349239	-0.0150538906951125	-0.0436554602242903	-0.0224001705093039	-0.00364253859954103	-0.0121417209294507	-0.014970965060144
Mblac2	M1	blue	-0.0680485590265635	-0.0602136417342343	0.0830492751066542	0.0282306722927987	0.0569131124106718	-0.0658750755325604	0.0598054429107487
Map7d3	M4	brown	-0.0389511052875532	0.0246517008116687	0.0113619340873878	0.0791425921641107	0.0215174652238491	0.060267598380326	0.0721172556756413
Zfp185	M2	yellow	-0.10192364079782	-0.136231469815895	0.0167453715825785	0.0792924025191517	0.0769852862547595	-0.0471722922795098	0.0117858692932911
Ttc39c	grey	grey	-0.0711089025668736	-0.0654213462846174	-0.0668088951074611	0.0824222266784151	0.125460818836839	0.028217787228016	0.050367240892408
2610203C22Rik	grey	grey	-0.041267413632542	-0.0842449497603446	-0.042959376106907	0.0470438238692522	0.0989987395703813	0.00989659949416427	-0.018923469658077
Tlcd2	M6	red	0.00464144931944475	0.0204445364284053	-0.0220813658532645	0.0797754076912632	-0.0422074553448677	0.162885004717363	0.193837649238425
Dapk2	grey	grey	0.187209455757012	0.177228203129748	0.200485920328209	-0.329662275029423	-0.25009111291062	-0.18156278506771	-0.200232702652548
Gm10138	M3	turquoise	-0.0220905615966351	-0.0810771686290402	-0.095544535251832	0.0263098414657173	0.0388992034526462	0.0371600043377498	-0.00613957246314774
Hexim1	M5	green	-0.0869372342262441	-0.0798954886667696	-0.132644870694037	0.146435035183763	0.118420391404478	0.350409616960666	0.313190303804176
Lpar6	M3	turquoise	0.0688530489426382	-0.00178297972038175	-0.134679689247419	-0.00928248091015498	-0.000933125062755062	0.126757625198263	0.0382206231745132
Jun	M5	green	-0.238537941501316	-0.135683350796553	-0.170759218965291	0.398754387003389	0.226875617347374	0.610818013284964	0.599825532012922
Uchl1	M3	turquoise	0.0231659787689251	-0.101568025643251	-0.120674500405606	0.00280494741190229	-0.016269846351628	0.0436570783265289	-0.0168089395847391
Slc4a4	grey	grey	-0.0993916397951939	-0.0375734689443789	0.0351627180012236	0.0884560697452886	0.078595868482741	0.00162564675820564	0.058515353529205
Mras	M3	turquoise	0.10240849320697	0.015874617247435	-0.195640348150856	-0.0526685686365064	-0.0799876822077972	0.0981956845292198	-0.0476307581087543
Tnik	M1	blue	-0.353545605747184	-0.227865682159381	0.109798561493427	0.263815344293934	0.288655444236881	-0.0357618161967279	0.169071843840686
Cfb	M1	blue	0.117203209107442	0.0772392554089448	-0.113549649183968	-0.0650205346105551	-0.1175026895922	0.026759866759389	-0.0686853619859415
Pcf11	M5	green	-0.0664594219362795	-0.0657603101627273	-0.121029897626175	0.132275154805143	0.119569515765768	0.337612373011256	0.261386816068988
Pde3a	M3	turquoise	0.174459520724461	0.0672420648802027	-0.45811031063569	0.01270368203089	-0.0362540306805632	0.281165630359917	0.0375573257596167
D430018E03Rik	M1	blue	-0.0688443769965732	-0.0769218119893966	0.00180080682033975	0.053366670275401	0.0709848265172378	-0.014075408722882	0.041787042645851
Nop58	M6	red	-0.102441080175158	0.000341622086894675	-0.00547423998403217	0.202455888295859	0.1064591100171	0.279247076409299	0.358363999031576
Rtl8a	M3	turquoise	0.0679179603558272	-0.0795752461750027	-0.366738161325133	0.00255810383699192	0.0519963681789433	0.113145919760225	-0.0549159051383455
Sncg	M3	turquoise	0.293063948489807	0.233439079545059	-0.107268717677917	-0.157951931091831	-0.328712816098305	0.110433202075105	-0.0296726807428594
Foxc2	grey	grey	0.120938432851727	0.132360350654674	0.0187634566026031	-0.107310419811855	-0.199116293596537	0.0246920328964572	-0.0176411086951763
Sapcd1	M3	turquoise	0.0455158254926424	-0.0326725444875619	-0.0551788860029269	-0.0588974529078817	-0.0259153655501906	0.0260050510502735	-0.0168469209615952
Slc35e3	M1	blue	-0.0624189813966608	-0.0295717031706002	0.0767302672470279	0.0467311102643393	0.0357923877864322	0.0091879480307691	0.046311163657306
Gbp5	M6	red	0.0656720629542761	0.0446170912345129	-0.0287338919074164	-0.0401236098830468	-0.104385382003345	0.0492048653179933	-0.0176098484713806
Dusp1	M6	red	-0.45198659588432	-0.255537416696619	0.0714896672347398	0.492507861420931	0.333956626024667	0.270128271363541	0.507549437419941
Fam135a	M2	yellow	0.180178161062389	0.146122662357268	-0.0689153370353456	-0.0988357692898749	-0.193085854137323	0.022282979126893	-0.0443927128283248
Itprid2	grey	grey	0.20244620934204	0.203808901385398	-0.0752600388657042	-0.0972123409932898	-0.280182842003816	0.0640794931565845	-0.0536135225354814
Ptprf	M2	yellow	0.0334742105077071	0.0242117812018924	0.0752213944756766	-0.112690987466799	-0.0838942600733104	-0.0548523058475091	-0.0479448572625705
Heyl	M1	blue	-0.233357000348735	-0.118398690183353	0.127855995291592	0.176057282427827	0.148197384390681	-0.0753144551565552	0.077765442182741
Ier2	M5	green	-0.104898463219934	-0.132479893091001	-0.332430946370186	0.305797415063009	0.151207225199513	0.640352163602639	0.466350863120451
Ppp1r15a	M5	green	-0.0261596322717632	-0.0533962129872037	-0.239812529918578	0.215525953799506	0.0155663966053978	0.661248652385985	0.497656753113345
Gbp7	M3	turquoise	0.0874676871207502	0.0515823711162443	-0.196359360109858	-0.032457513199004	-0.0459855403248755	0.123808144962771	0.0162151425484879
Igf1	grey	grey	-0.200155409729192	-0.13393527337682	0.0415642245840559	0.138147079427359	0.196303768336703	-0.0239561219799445	0.0250433388836094
Chka	grey	grey	-0.128394664184447	-0.0897289212839938	-0.0472665374539105	0.159071048157057	0.163577683338177	0.160642265329316	0.212752557724868
Nt5dc2	M1	blue	-0.44787941001554	-0.307075379810378	0.109684099626602	0.363387807237227	0.35553081120413	-0.0301303790268373	0.182565760337173
Zfand2a	M3	turquoise	0.0805517746057419	0.0436743160820769	-0.091096963203216	-0.0176387460844081	-0.0390209853582152	0.186192830133053	0.101170727846733
Maged2	M1	blue	-0.0249234718432284	-0.091661784850975	-0.131277969756736	0.0421459461875337	0.0457988994184942	0.0234924549551413	-0.0235448540776514
Mical2	M3	turquoise	0.150140423313946	0.125696550657807	-0.12398016181368	-0.0497116756029469	-0.176486670145353	0.114853066276284	0.017039720337671
Hey1	M3	turquoise	-0.0253555100292448	-0.0891245494772836	-0.268465647686128	0.0971724971428079	0.10241791518764	0.148450591630826	0.0559444478983398
Tspan6	grey	grey	0.198370811102982	0.134245292226578	-0.139984037356884	-0.10704566079945	-0.20882429109707	0.0925872846015171	-0.043049079565907
Ehd4	M3	turquoise	0.266485239470216	0.0330987730964753	-0.627036282602521	-0.0434612026523801	-0.140075092927684	0.338947479892672	-0.00470545889562019
Rel	M5	green	0.071349342839354	0.0306095189966336	-0.200801284108397	0.0355299988194728	0.00894534641070169	0.360330287431951	0.247679117160217
Dll4	M3	turquoise	0.0678150420897177	0.0129050475481073	-0.171626266560374	-0.0470870615175271	-0.0259116810386726	0.109618040364226	0.0186763298649706
Fam181b	M3	turquoise	0.0844515700094018	0.0777883267901719	-0.178867418362433	-0.00552831613602238	-0.0182793355997966	0.152602757005379	0.0443376782416768
Rnf144a	M3	turquoise	-0.0806562667963513	-0.139839452010966	-0.204471250994132	0.101404951837964	0.128668829566495	0.0420078352354671	0.0231353076552362
Nuak2	grey	grey	0.0315333604314603	-0.0400641607880319	-0.113888750955766	0.0157203056861232	0.00651206870199546	0.139442717295075	0.0686981492195546
Celsr2	M5	green	-0.0673172867852268	-0.103381811195925	-0.108736583493163	0.106703648003766	0.123138586327946	0.13642066816604	0.0966635511343603
Apex1	grey	grey	0.0511631108282005	-0.0247656265538387	-0.108513067850067	-0.0100218136747484	-0.0227545934895113	0.0692925287773227	-0.01800077758752
Pkhd1l1	M3	turquoise	0.212009844333645	0.221618948164802	0.155266555781161	-0.263126225417333	-0.308235443475761	-0.0631603015168034	-0.109256758740705
Tbx3	M3	turquoise	-0.148819074715139	-0.266385431066947	-0.265913547084243	0.143761273488927	0.268663222371951	0.0653093782191487	-0.00172173455288873
Mrc2	M1	blue	-0.519278791255219	-0.359551941901904	0.134558095611035	0.40247214182168	0.419540484468484	-0.0457049437134508	0.229802654960781
Trmt61b	M3	turquoise	0.0581310313132041	0.00587669143688281	-0.115037426306265	-0.0394966012807063	-0.00190579822675626	0.0194808307816058	-0.051394873484609
Col4a4	M2	yellow	0.00271331223417493	0.000349511551274206	-0.0112739032123684	0.00664560481633142	-0.0431470970936527	-0.014765467078404	-0.0227081185267887
Cpt2	grey	grey	-0.0745048921786996	-0.0143199467667608	-0.021847424525882	0.100656149716188	0.0668206929306161	0.0223466245558457	0.0408601319008132
Mmaa	M1	blue	-0.0748802450517216	-0.0495117705055201	0.00654179276383012	0.0330797219766225	0.0538277205348495	-0.0166226573976347	0.000930796308747509
Slfn5	M3	turquoise	0.00666474192674085	-0.140199948930193	-0.373356267935836	0.0634452052882252	0.120800317982263	0.198322363910332	0.037674703478866
Slc38a5	M1	blue	-0.498223269097515	-0.3127808159636	0.143262676038801	0.418833817356335	0.405923322551783	-0.011950318879238	0.258620410224487
Cd55	grey	grey	0.166659707865781	0.156608536850585	0.0615061337882941	-0.215990598624237	-0.249929736686009	-0.0488522251143779	-0.0890277477466889
Gucy1b1	M1	blue	-0.182371031734332	-0.123972846880753	0.151679932677914	0.0629006132069271	0.113818038751168	-0.114568911320585	0.0104421579951054
Dnajb4	M4	brown	-0.387910847668659	-0.151412343310727	0.088753115119462	0.462981209583002	0.348360227603062	0.189106238914302	0.418407762705707
Tmem245	M1	blue	-0.0584450390372565	-0.0757356683963303	-0.066236791390802	0.0813061372321882	0.0856430554212942	0.0786293239683281	0.0792541482547798
Scarb1	M3	turquoise	-0.00770409302706039	-0.148008778793474	-0.389500515097513	0.105458536807753	0.137793062954107	0.260960214426861	0.0849631534075187
Shroom2	M3	turquoise	0.0614294028586089	0.0464154049690201	-0.0840986016222517	-0.0599579229369624	-0.0313843125963379	0.0858732059361897	-0.000968680821155912
Bend5	M3	turquoise	0.02650163408491	0.0405492808079501	-0.0304264477686388	-0.0450952548710078	-0.0426953878489499	-0.0258014865376901	-0.0634595979581088
Slc9a9	M4	brown	0.0276750420693725	0.0549739642336597	0.128704092373476	-0.070804093717154	-0.0443633226614714	-0.0300508185349917	0.0129033454701827
Nrip3	M1	blue	-0.100714984071271	-0.0294069365065343	0.0197813245379489	0.0719041330418574	0.0851295480765214	-0.0355715770860566	0.0097472477576057
Napsa	M1	blue	-0.052333633163085	-0.0432072337026243	0.0109080917380154	0.0447663568245651	0.0532342819030502	0.0059714088532798	0.0211161433299516
Tmem191c	M1	blue	0.00251590328247811	-0.0760900925611477	-0.016057643268407	0.00403368831744066	0.0260993712887855	-0.0349078427915774	-0.034619446737803
Gask1b	M2	yellow	0.148659750347957	0.0664692916027994	-0.244535310956908	-0.0431415552866307	-0.105051097185416	0.086805176140541	-0.0340451849045116
Pi15	M1	blue	-0.328747097681169	-0.143878159174041	0.134655689179804	0.253725286471047	0.269313914889196	-0.0548171065750965	0.141880192374118
Ccdc88a	grey	grey	-0.123891529525948	-0.105476101202364	-0.0313032077200659	0.100025713892763	0.103907567711874	0.0062375020068787	0.0472138547341927
Gm49708	M3	turquoise	-0.123374343673909	-0.108412987939104	-0.017918665126669	0.129740040994168	0.106131806860098	0.0430680880532496	0.0762359554530214
Bambi	M1	blue	0.086352984198982	0.0519801827056619	-0.134417647819253	0.0282261383332193	-0.0476192022270985	0.200914980749365	0.108530006826905
Lrrc32	M3	turquoise	0.194553405316814	0.126913350285619	-0.156899367746996	-0.11923054784235	-0.191540439928338	0.116030700642556	-0.0282368200435525
Clec1a	M3	turquoise	-0.161247435462128	-0.279648356188157	-0.329040941123424	0.17920449308048	0.301520426775834	0.0538506942237248	0.00996639509900029
Ugcg	M5	green	0.0960570205443921	0.131236840537311	0.00272720605591657	-0.0932558954685358	-0.124310058808416	0.112998127059271	0.0489649517362771
Rilpl1	M1	blue	-0.0470570603478351	-0.0449274932958841	-0.0447349439814277	0.0448380014682248	0.0564443472522955	0.0341859539732177	0.0242485805752861
Dnajc9	grey	grey	-0.0194717647286004	0.056203097115108	-0.0421353362166024	0.000399616296692603	0.0111518868700577	0.0801470565818728	0.04433258538917
Ar	M1	blue	-0.225422624060943	-0.085892673730348	0.140884315758547	0.0918369957296727	0.138459261209291	-0.101394120843389	0.0557552675800626
Tshz2	M4	brown	0.404010498279079	0.34973428483121	0.0348748274340951	-0.460426791842878	-0.413628420823689	0.00903925743211976	-0.131971336035499
Lrat	M6	red	-0.235401647138797	-0.190675382482879	0.0327933252973497	0.221264059973706	0.236860425472825	0.0509364050895525	0.19421473816553
Bgn	M1	blue	-0.585069744075351	-0.411979860563128	0.125813656751871	0.532516641929018	0.358284888040694	0.0158247828216694	0.263544206462557
Celf2	M4	brown	-0.496722557509571	-0.234439278287377	0.200881640279628	0.420803570007247	0.423650561789896	-0.0197476050143469	0.290525811797774
Lyz2	M2	yellow	-0.0479148578696471	-0.0626897987177513	-0.00138235814903759	0.0545493113467167	0.0616947466878178	-0.0241327329055552	-0.0147065894524863
Slco2b1	M3	turquoise	0.126985242131389	0.147928704597775	0.126342156627233	-0.235868586837547	-0.18382265024023	-0.0609163250985365	-0.0732107310171731
Slc38a1	M1	blue	0.0848009685549785	0.00966669585976883	-0.0361137243886165	-0.0546936291816378	-0.0821476086667055	-0.0215165224002812	-0.0641257023277325
Duox2	grey	grey	0.142263193095504	0.15520039729541	0.12883354394699	-0.238897842010786	-0.191636740832231	-0.165772260214367	-0.17196651243804
Rab20	M6	red	-0.11424276639829	-0.0932748260491194	0.0119134509012843	0.177407732680367	0.10565346829189	0.181794722005767	0.228992495000595
Fbxo33	M3	turquoise	-0.029571928093685	-0.0460368658282537	-0.0299809547064308	0.0706447722632336	0.0561588560973412	0.114303063277386	0.142113125652443
Slc25a25	M5	green	-0.0145037017281739	-0.0245885223192594	-0.124098697521218	0.100118083549925	0.0544212759165611	0.299247454358387	0.20230467443763
Ptpn14	grey	grey	0.306569402193564	0.241783502950546	-0.0573613043768713	-0.325960278284312	-0.352736010381401	0.0192032278727911	-0.11983349250718
Mvk	M6	red	-0.10749044144142	-0.0737310279542079	0.00390080237028645	0.0923430921459818	0.0982786422661589	0.0687565815920405	0.124805796574175
Ckb	M1	blue	-0.372382190391297	-0.252974916338564	0.142748532686048	0.281171785060897	0.291211863234258	-0.0302907919510141	0.141035985592105
Tmem119	M1	blue	-0.530344209778212	-0.286464327928375	0.170985130388231	0.445783933749081	0.447138170499324	-0.0432082810139526	0.252303737006148
Specc1l	M1	blue	-0.481014937071484	-0.302927419949044	0.112866006821408	0.364956724839689	0.41134829576957	-0.0328172357983826	0.207404062821289
Fkbp11	M3	turquoise	-0.0351229869550323	-0.0778697361133412	-0.12462844446752	0.0331443239161974	0.0985461734951309	0.023459081236666	-0.00573649494604233
Eng	M3	turquoise	0.138247815275457	-0.0874051434576256	-0.598147773590614	-0.00632832616397071	-0.00500597974411745	0.292918593800181	-0.016193071976347
Fgf10	grey	grey	-0.271709083756235	-0.163223161702156	0.0344765094800488	0.2384071421941	0.269862776848342	0.018006916854566	0.15836348339911
Stard8	M3	turquoise	-0.119722437658656	-0.140724709046632	-0.171872547071031	0.0975187163347304	0.183754079037236	0.020575559089091	0.0450780746685555
Trp53inp1	M1	blue	-0.340351737960971	-0.205248623789915	0.0390763499922705	0.299538777486695	0.318285741173172	-0.0179120745567768	0.168617122873928
Scube1	M3	turquoise	-0.0411191247358836	-0.136773990301603	-0.194856436736456	0.0526562645109075	0.107572192516649	0.0201334845054374	-0.00510804031511574
Scd2	M2	yellow	-0.196698467373407	-0.199948562070371	0.0341565354466515	0.102226654371154	0.134481760557067	-0.0461700276113217	0.0583746667133717
Cd2ap	M1	blue	0.0884807997642258	0.0129859192044577	-0.155176558316361	-0.0240289304386421	-0.108116438955533	0.051728795416475	-0.00245086087125808
Arhgdib	grey	grey	0.278986455387578	0.206269560293918	0.0501963982414226	-0.317686211253097	-0.326386762121853	-0.15722017755143	-0.236690339812024
Nostrin	M3	turquoise	-0.192388593268121	-0.293620593871121	-0.322499166391262	0.220590273386796	0.315157622288255	0.119572340884229	0.0788051426339364
Gpam	grey	grey	-0.219018928313197	-0.0835949359605256	0.0303599104137554	0.213794459900518	0.249419148782706	0.0322107110676369	0.131041548049902
Thsd7a	M3	turquoise	0.23143610209711	0.232928566678447	-0.0157186275908266	-0.200239031663856	-0.27834358589234	-0.012958947401438	-0.0935038987520279
Gas1	M1	blue	-0.262902367274569	-0.0853257530475669	0.0976239804868547	0.225071405586287	0.204747739505693	-0.00173838491081536	0.160062585382612
Lamb1	M1	blue	-0.398949027337033	-0.220859097524488	0.162935860296505	0.290014865248071	0.316729465907126	-0.0435441256768267	0.142891622014548
Hsph1	grey	grey	0.0127499958413852	-0.0492801063931281	-0.099182005086077	0.0106353859991355	0.0165655199888668	0.110111021119784	0.0622342671891197
Smad6	M3	turquoise	0.0642073044946627	-0.093392081441162	-0.440989268930392	0.0417476773302045	0.0525223023380641	0.174832332348839	-0.0300749603138289
Hoxd8	M1	blue	0.163366013075539	0.167192372317969	0.166837178090422	-0.286495422972167	-0.221064157604756	-0.0927918534752008	-0.126659477749663
Cep250	M2	yellow	-0.0158255679182892	-0.0910671595414646	0.0154144878000051	-0.0110708376837487	0.00613948165893981	-0.0348446782485771	-0.0213253190405613
Rhou	grey	grey	-0.131818610383835	-0.0840134180444171	0.029458023215582	0.131502556699023	0.144279799480136	0.0102115927024312	0.0847271203916477
Arid3b	grey	grey	-0.0241683304734035	-0.0711566463284209	-0.0793446798211914	0.0409282236361975	0.0800527658442456	0.0250689396459912	0.0132805202697503
Zfhx2	M3	turquoise	0.0500483267608575	0.00741645177411327	-0.137010655846782	0.0122263939149806	-0.0420719018746095	0.0967685023485193	0.0270562040724618
2210011C24Rik	M2	yellow	-0.138001522596792	-0.176815538238873	0.0472848181197403	0.10135966060744	0.102392454260287	-0.0518270488697282	0.0267420299205203
Nexn	M1	blue	-0.399046147332985	-0.269808915283955	0.157385174307139	0.291021465405854	0.331621556635474	-0.0419886948293888	0.183995285847471
Hspb11	grey	grey	0.032812596581775	-0.0145681402844546	-0.0891903644426457	0.00618030280469682	-0.0701814992967326	0.0885198426854949	0.0536739497997366
Il11	M5	green	-0.102015295553208	-0.0218172720825429	-0.0205332439401468	0.124545907863004	0.0925476111160134	0.132246068317141	0.151767779184939
Scnn1a	M2	yellow	-0.12312090043931	-0.181968384096631	0.059437248119561	0.0895334228848108	0.0867727773693004	-0.078561540169379	-0.00298602072201907
Ift88	M3	turquoise	0.018340722795412	0.0200210969223929	-0.0791464146474166	-0.00603749493327138	0.00894381706941049	0.0500712261403277	0.0119808708794151
Pdk4	grey	grey	-0.248238473113082	-0.128079643857778	0.0617024841841459	0.198015324987149	0.237932704606177	0.00767583517996111	0.138201013802579
Tslp	M4	brown	-0.183150927423591	-0.0872755620015181	0.0927340806280674	0.217182714489001	0.108633781560124	0.0507640237458839	0.175603455578963
Rufy2	M3	turquoise	-0.0504340597962912	-0.021781089513613	-0.0112912974116264	0.0586350224805073	0.058549501771169	0.0430623667322174	0.041503997786146
9330159F19Rik	M1	blue	-0.378061052527186	-0.212045708936222	0.128334977603745	0.301426709610064	0.33676262274529	-0.00534174851078906	0.201261099002314
Dnajb14	M3	turquoise	-0.107469604469127	-0.102432417437271	-0.0847698427174026	0.100957643898585	0.122282773957866	0.0375754327164211	0.0798654352134593
Cyb5r3	M2	yellow	-0.00692692432207977	-0.252286374206838	-0.00295148835562223	-0.104290581935546	-0.0640227999970646	-0.154193288803172	-0.17914477056398
Dusp6	M5	green	-0.116717059139304	-0.0646696693098085	-0.0410021764059614	0.100407538427307	0.108024132609077	0.165106300333479	0.172144656398833
Slc5a3	grey	grey	-0.138207313706514	-0.0837996152100843	-0.0333057683864073	0.167254093253694	0.154164874756383	0.133156027162623	0.180413443166432
Mast4	M3	turquoise	-0.0411295442212052	-0.00994147746840881	-0.211129228075603	0.140958300521312	0.0594214560508262	0.249202626811993	0.169197418089179
Slc36a2	M1	blue	-0.477176841036013	-0.329923074089784	0.155434024336208	0.405717338697692	0.418571375203934	-0.0420004720130861	0.219594933412166
Birc3	M3	turquoise	-0.0381537417347645	-0.0581256860417901	-0.15396307513704	0.132208392236105	0.0619517382789615	0.228323854311191	0.198327425212434
Itga9	M2	yellow	0.079782058701548	0.0840261682955467	0.140627925310233	-0.206423989291826	-0.16035451817709	-0.0586147783184984	-0.0275020043512793
Cys1	grey	grey	-0.292077171867451	-0.176752154862028	0.0469281586259661	0.26615392364734	0.291417054803287	0.0193527707462563	0.155671324558176
Ece1	M3	turquoise	0.401757307566736	0.15652873342264	-0.544257338862867	-0.264417082105318	-0.246359238816557	0.20849433561978	-0.142403133192504
Dock4	grey	grey	-0.52344212078792	-0.294963491719019	0.0490917565198828	0.469062054223054	0.494362971085028	0.0757779670140574	0.297757286392252
Cryab	M1	blue	-0.550352034362368	-0.527291067255056	0.0353960429549714	0.467937744534015	0.49843365480382	-0.00637907614012032	0.208979099752245
Fnbp1l	M3	turquoise	0.0144948226051084	-0.153038069410797	-0.32781186286267	0.0654500764432177	0.105136237556753	0.152484092872345	0.0535462317448977
Kbtbd11	M3	turquoise	0.140695116179198	0.134239056954451	0.126549048977727	-0.262709784323977	-0.176487988029012	-0.109407534811069	-0.142625874187882
Tead3	M3	turquoise	-0.188315043936725	-0.150179930298924	-0.015848641054527	0.153639886681133	0.203277836314309	0.0183250674575858	0.093015239918739
Hist1h1c	M1	blue	-0.0680236413722102	-0.119241204047195	-0.00449941244016659	0.0547687091306205	0.0238152820169061	0.0298313436301415	0.0440783961546604
Tifa	M6	red	0.168578645328591	0.110970973886163	-0.109290217471881	-0.0751831221794551	-0.134553674296534	0.130942153546462	0.00970502771402531
Ucp2	M3	turquoise	-0.0181195087823928	-0.190098843967677	-0.445368120206437	0.0611359627507033	0.0832998698471261	0.221602732333392	-0.00992722964093994
Cd2	grey	grey	0.0615457739690846	0.0737864025576364	0.0602102161562247	-0.108373081579773	-0.102565980787055	-0.0894406151834801	-0.098847008812583
Gm42699	M6	red	-0.0443647437950879	-0.00179485175736262	0.0143391432579941	0.0544492160379441	0.0407159940919046	0.0560392730793298	0.0966102936606712
Dennd2d	M3	turquoise	-0.0153714651350542	-0.0336246349708712	-0.00897289680805907	0.0370194598095078	0.00620168041436565	0.0577547295334214	0.0514084130918299
Aass	M1	blue	-0.151743101082572	-0.0618292083342211	0.0662144780131157	0.0921217447092993	0.115109207488668	-0.0414402312699028	0.0378733601109921
Gpt2	M1	blue	0.0574901954129229	0.0498199014268627	0.0566831519604152	-0.126034077448185	-0.0727022311923488	-0.0683821694226319	-0.0779405199738051
Gm12043	M5	green	-0.0704181533757844	-0.0150289382392656	-0.0430297377780882	0.0711469437689462	0.0934721474265873	0.0613848044755142	0.0478137662596631
Hist2h3c2	M3	turquoise	-0.0803924091370441	-0.0449361653738472	0.0105115620384968	0.0804057329649321	0.0698985302697699	0.0127105747120046	0.0945301838814551
Treml1	grey	grey	-0.0505315982309286	-0.139296046762508	-0.0566800842851948	0.0385116953810893	0.0555066606378798	0.0257200131633342	-0.00185060596234178
Cacna1d	M1	blue	-0.484178452137676	-0.293924339110835	0.132857936422559	0.395046583140152	0.397603129686724	-0.0467479365740221	0.214605809383972
Efemp1	M1	blue	-0.476445442637626	-0.267627708729417	0.181182019265744	0.391322939471298	0.329158730714254	-0.0546515486549631	0.206896045181093
Pmaip1	M3	turquoise	0.01915095635822	-0.0703193714498728	-0.114912104655282	-0.0527289820829251	0.0624129751166277	0.0819891300536532	0.00352299506942389
Spon1	M1	blue	-0.708426277245972	-0.437655235785257	0.169637464013434	0.604310204860311	0.533005781737112	0.0150765326413474	0.357253789506649
Arhgap20	M1	blue	-0.0374242601908628	0.0229662534226257	-0.0540396687623391	0.0817875668725841	0.0649429338896063	0.0300400440452169	0.0650855863115915
Slc2a8	grey	grey	-0.154370761761942	-0.159226526308341	0.0183034430553747	0.108046902105793	0.127919921136556	-0.0256190126778692	0.0517737347947418
Chrdl1	M1	blue	-0.276054865162326	-0.195873991254763	0.0783260096499323	0.206492750331618	0.231605999229907	-0.0829048509831143	0.0519583711697081
Zfp503	M3	turquoise	-0.107409383744642	-0.0729416907417449	-0.176370132903429	0.170744518924636	0.159720226135148	0.217640043231964	0.206860714602823
Slc1a2	M2	yellow	-0.183219465412714	-0.130064823458923	0.0855835353334744	0.118894826992962	0.143569879322231	-0.0825989916476974	0.0298732821782088
Lss	grey	grey	-0.124095124640185	-0.101493517487509	0.00209569513495829	0.0939711724779665	0.129396066864263	-0.0187453784034512	0.064141033428293
Tpmt	M1	blue	-0.089693335092161	-0.0542633155673321	0.0993138835209885	0.0304021779265179	0.0457757605136857	-0.075209244947061	0.0031450815157406
Ppp1r3c	grey	grey	-0.130375854501154	-0.0760681928855842	-0.0204798458826188	0.112846028555561	0.18118200492662	-0.0241303144006692	0.0692030744618174
Pfkp	M3	turquoise	0.0223258666232448	-0.0367000395240781	-0.103982472620189	0.0152081764304302	-0.0370522022378149	0.142162409762119	0.0973819137775751
Zfp36l1	M5	green	-0.32159278165642	-0.195439691086847	-0.0356296815064258	0.410124175440463	0.237372736501172	0.421394820018885	0.479460822200434
Eepd1	M1	blue	-0.292315431392644	-0.1583395622707	0.115882462042099	0.248573207379359	0.215858063155737	-0.0222649715538709	0.170791864948566
Plcb1	M3	turquoise	-0.067963681456313	-0.223468545942509	-0.268570474237699	0.101521111520284	0.180282723853757	0.116547023815124	0.0135684332114316
Mpp3	M3	turquoise	-0.0169067713824731	-0.0532332870522417	-0.119029100832246	0.0530063580489782	0.111140241486864	0.0438294999034715	0.00943728084650135
Fgfbp3	M2	yellow	-0.0451939479930468	-0.0796590084350443	0.00741577262654312	8.08502655692348e-05	0.0142113961902758	-0.060525623198178	-0.0551603591901034
Tnni1	grey	grey	-0.0649432778334739	-0.0681554088190876	0.00957270067150007	0.0720621866017164	0.0696645328651343	0.0242066374995745	0.0268765836765012
Kif18a	M3	turquoise	-0.00555594124911365	-0.0397615278058958	-0.127346882990067	0.00679906170467582	0.0509038580509296	0.0340892687204999	-0.0270890744173479
2410131K14Rik	grey	grey	-0.0202447149007997	-0.0365388182479216	-0.0614402484807615	0.0402893602281036	0.0366734097662117	0.0319503700067591	0.0238363921181077
Apba2	M1	blue	0.117745964868845	0.112258506037102	0.127514500195978	-0.217409562727248	-0.15446239290299	-0.0507439269270609	-0.108954753568182
Zfp930	grey	grey	-0.0636422812148607	-0.0490632033065246	-0.0190302321096605	0.0830950672259846	0.107145556342885	0.0265131384486805	0.0426114509048655
Gm47644	grey	grey	-0.0301636998548171	0.0215937768581693	-0.0296650499003711	0.0268399018636223	0.0483395523285205	0.0253071869202184	0.0398310873722153
Pik3r6	grey	grey	0.0444023925163811	-0.0586479962591413	-0.102274377815136	-0.0335291565810434	0.00616929368114766	0.0356594574681867	-0.0427880223918052
Cdc6	M1	blue	0.0597439361843085	0.0444362885370084	-0.0282570757417198	0.0013110555640706	-0.104625943072941	0.105448193908021	0.0761592717323127
Enah	M1	blue	-0.157042488213099	-0.122725517045405	0.0430729009877917	0.124118315197634	0.10265252772799	-0.0293720387526396	0.0822341440559833
Medag	M1	blue	-0.250990841667026	-0.140764843349828	0.10136082474955	0.236823397223175	0.18108879967827	0.0154696257917274	0.157760128182426
Fzd8	M3	turquoise	-0.0352407957886926	-0.0231717705509486	-0.0697740274904028	0.0629140099967159	0.0233098073470742	0.141200621782923	0.12024894092726
Pcdhgc4	M3	turquoise	-0.0560291978955647	-0.12704675746715	-0.0916353651807881	0.066844977961251	0.0779457327801595	0.124828367949292	0.0862701378589653
Mettl5os	M2	yellow	-0.0503131286808664	-0.0690325584530897	0.0229896231757409	0.0309188522137101	0.0336497182815751	-0.0263821483685181	-0.00949846885024589
Naaladl2	grey	grey	-0.0577049528056043	-0.00336530081744762	0.00838061251748212	0.0523156164900261	0.0786906095240128	0.056637249636835	0.0422544225845156
Lgals7	M1	blue	-0.0471936577797135	-0.0281830502128476	0.024557781415873	0.0287752212605454	0.0327710393108813	-0.0431097908525566	0.000476862789049064
Gm26793	M1	blue	-0.0300085802728606	-0.0283781842344733	0.0269546124351102	0.0307229594842684	0.0154167250931978	-0.0204122364626956	-0.00419683980605215
Kif5a	grey	grey	-0.0317407264414609	0.0252219713516126	0.000665274057707774	-0.0129605159815629	0.00145791158723516	-0.0210643895300796	-0.00331151746923579
Nlrp3	grey	grey	0.0227505619908597	-0.0368012995124698	-0.0276991779180964	0.00276097038261829	-0.0321862137173828	0.043232398365039	0.0380959722104397
Wnt2	M1	blue	-0.493239260014408	-0.31371854452397	0.131269479130957	0.413535118433612	0.391844689365197	-0.0259117916550187	0.254182581853615
Fblim1	M1	blue	-0.405744694167022	-0.184389762920584	0.124691491334745	0.3685523357261	0.289582379816928	0.0148987307420991	0.240748625142498
Tbx4	M1	blue	-0.426107184618214	-0.297170224545918	0.115040619224561	0.349038673781832	0.37365436463154	0.0194883928015753	0.23757966597423
Pakap.1	M3	turquoise	-0.118455855561543	-0.329075086713154	-0.365586680798692	0.178326101976564	0.158581195638816	0.247813316646052	0.0973660341838073
Fggy	M1	blue	-0.178161184423989	-0.128437730438518	0.0629450400563564	0.146233805862964	0.144247179682112	-0.0360260809748855	0.0854292319875765
Zc3h6	M1	blue	-0.171204684294366	-0.0980371782233204	0.0896287270717902	0.128021664215976	0.15395990218518	-0.00932681274546695	0.0892071845123959
Mylk	M1	blue	-0.679612919877487	-0.478014314028217	0.136215120183683	0.536153678718182	0.55974249489651	-0.021643915570908	0.28054817834725
Arap2	M3	turquoise	-0.129936639854016	-0.2770287824119	-0.23286573137917	0.10704768802278	0.226459306936578	0.0642895113265528	0.0126976322486721
Ptar1	M1	blue	-0.303515803276927	-0.220925071091585	0.0676296830378525	0.247413219828351	0.275503096452956	0.0214916235337171	0.170388215460432
Amotl2	M3	turquoise	-0.0552052556517871	-0.0760126345647383	-0.248909017149701	0.115072464713478	0.127954539682558	0.232220322276629	0.169953907639402
Manea	M2	yellow	-0.0538666137572142	-0.108209231327712	-0.0564717800255837	0.0661399336565708	0.0551597345835206	0.00621769611834325	0.0149182545426025
Synm	M1	blue	-0.362973529717798	-0.391191481544251	0.0773547787404982	0.229894798090455	0.316752046582921	-0.124199871198235	0.0306027458075065
Klf3	M3	turquoise	0.0881521861851499	-0.0964427760688456	-0.47468411380663	0.0202059458468326	0.0318322099020736	0.268844512194289	0.0264436382214974
Mfsd4a	M1	blue	0.0867487038075186	0.0972284071917449	0.0645376512016751	-0.171336849867948	-0.13480099352746	-0.0468933816692073	-0.0786488350362373
Slc43a2	M1	blue	-0.165052194537063	-0.137037960977852	0.0634796139115627	0.142501424107776	0.128485876622626	-0.0655455765242915	0.0350161254771501
Lrrc8b	M3	turquoise	-0.106880743605437	-0.217734099678618	-0.220101276895772	0.114279424588134	0.184893388832114	0.0297743339086694	0.0246001150913222
Spry4	M5	green	-0.0513004533037603	-0.0471445385414181	-0.0430671107020497	0.045859409502938	0.0889172592582662	0.180079303799925	0.18500628014885
Krt80	M3	turquoise	-0.038738829297958	-0.154716499180368	-0.24515587365036	0.061128791471307	0.136154584562029	0.0419857316031279	0.00387280681217268
Anapc15	M1	blue	-0.0237187322464621	-0.0808590143875454	-0.0259212259008376	0.0432627639019416	0.0268581525725341	0.114279210096953	0.0768799837651172
Rab27b	M3	turquoise	0.0657829459492586	0.0102257686302158	-0.15866881289942	-0.000667776743855316	-0.0275842455619198	0.11261394081231	0.0603067330991936
Fam174b	grey	grey	0.206417693977911	0.0658725209571403	-0.225978975230092	-0.143284135857595	-0.172361433912198	0.0321295532678314	-0.130288075167774
Adgrl3	M3	turquoise	-0.201634470553109	-0.219784973200326	-0.288148562530975	0.225060840710224	0.313197118234371	0.176490327882565	0.174384299058425
Ifi203	M3	turquoise	0.0536553149380781	-0.0254597792792289	-0.246887884910655	0.0166399900200095	0.0238470013123159	0.1328161022531	0.0374565765097215
Klf4	M5	green	0.198081483913815	0.13361643075553	-0.256834023484823	-0.0536951536586439	-0.163874877685435	0.564828952927761	0.325354290349833
Rrp1b	M3	turquoise	-0.00938808734066579	0.00353383607178472	-0.0867363750457667	0.0193376047580542	0.0324711255068534	0.0287288931422768	0.0122982527895251
Efna2	grey	grey	-0.0640767096755	-0.0790060542434509	-0.107197733001251	0.114136313439915	0.101158313075746	0.161784719812598	0.178606856177201
Ppp4r4	M1	blue	-0.292407091250059	-0.209632648596285	0.124289241799643	0.222015945687932	0.218149305175012	-0.0499317868979362	0.120730423468019
Cln3	M4	brown	-0.104024436416884	-0.0376448851745777	0.0161096913956135	0.0893403549473404	0.0485689245651106	0.0325358431559785	0.0909928962149678
Il2rg	M3	turquoise	0.114514417315085	-0.0263502393100382	-0.296071281611699	-0.0315346618987562	-0.0280099390784418	0.175572205222808	0.00864647288038305
Akr1b3	M2	yellow	-0.0869944285130987	-0.16522036510302	-0.112759384602289	0.133982507451475	0.0433187024688502	0.0726429298247395	0.03454370166234
Rcbtb2	grey	grey	-0.128105560536397	-0.1062074853747	0.0103101515557071	0.0910296523062738	0.112733396411297	0.0239221125405143	0.0812285610573354
Fosl2	M6	red	0.0828134284640812	0.0575698442549548	-0.115684755983784	0.0250554610619261	-0.0694080121923759	0.274316973131165	0.21225512093945
Txnrd1	M5	green	-0.0101277038558529	-0.016644142888003	-0.0944014624034651	0.101291286651687	0.0199595247405846	0.324980413037856	0.274287738467365
Uaca	M3	turquoise	-0.0070741815955818	-0.104435064768701	-0.153530788448566	0.0682248688612157	0.0523459678355732	0.161503050011897	0.0847407119665121
Tanc2	M3	turquoise	0.218819745690998	0.200213910659869	0.00240372107013498	-0.206938802804538	-0.252177653750014	0.0338093968181643	-0.0634542683878271
Gpx1	M1	blue	-0.126504909433063	-0.0172925249586872	0.001936395036594	0.212054572529469	0.0614284559158018	0.261542255676584	0.314176038285241
Dipk2a	M1	blue	-0.427309675505248	-0.30331975226934	0.121291351493833	0.341150137699361	0.371995292123978	-0.0612057316027798	0.183737376981375
Resf1	M3	turquoise	-0.00778108340252162	0.0375995099593202	-0.129808271457622	0.0923616935983244	0.0531990230509426	0.150553747909109	0.119579828151898
Nom1	grey	grey	-0.082626054072024	-0.100776646984531	-0.0474812872196383	0.0610786711633349	0.0789613167167733	0.031597918637009	0.0560554226545044
Plcd3	grey	grey	0.0961427180253944	0.0523759116839957	-0.0829657701634887	-0.0505312187984334	-0.133946826708094	0.0531092020013154	-0.0383694650702184
Sema6d	M3	turquoise	0.0697664180949812	0.0123147680481135	-0.231378905604512	-0.0143425775316046	0.00467068518410368	0.170983499558822	0.0664581872192158
Sned1	grey	grey	0.0334648191267611	0.0466336058831027	0.103746298011145	-0.140392792337899	-0.077062916497859	-0.0510915201276152	-0.0283775214509531
Hist1h2ap	M3	turquoise	0.0687657098487078	0.0602711876662127	-0.0898509084570845	-0.0520020260877169	-0.0365920572486342	0.0842374328782119	0.0144495219397322
Bmp5	M1	blue	-0.491807243604948	-0.29628115943706	0.113997606862529	0.409825011695764	0.401720028444197	-0.0301255300427334	0.217864686086691
Cdan1	M1	blue	-0.0557270939116974	-0.0659199214922477	0.00882452146323602	0.090143663278085	0.0423614437473491	0.0672703723822653	0.0693376961008199
Itm2a	M1	blue	0.0762092854543026	0.0926070304756583	0.170175188051503	-0.180039376394514	-0.138203168436764	-0.112945588899701	-0.074959400328298
Smc5	M3	turquoise	-0.103506843129058	-0.033864491207343	-0.0224864369468184	0.0795712507532188	0.103694444516463	0.00914226948473919	0.00182341083183933
Rad50	M1	blue	-0.354423031780729	-0.290302156264573	0.0592471551500528	0.299224627369566	0.294840875774106	-0.0144905079819266	0.152323246911891
Adh1	M1	blue	-0.128893624382656	-0.0630735376242506	0.0404335068562914	0.123301525471988	0.0908638048791598	0.000155001752257572	0.0821675059970861
Fas	M3	turquoise	0.0951204875739543	-0.00720023616224764	-0.439348410948806	0.0663294745364528	0.0658306921531957	0.253815848613071	0.0309819075519251
Dennd5b	M3	turquoise	0.0089430445633685	-0.0809005522089264	-0.287300713673359	0.0776405375976022	0.0661760404827166	0.201457329702722	0.0802847916567531
Dtna	M2	yellow	-0.433488215214489	-0.292172391523813	0.0806834843924848	0.344958780257238	0.384882401787515	-0.0375864058681485	0.170460903596311
Serpine2	M1	blue	-0.352701466209782	-0.203216427078176	0.102667724021176	0.257271080580581	0.273951777053003	-0.00516676715933984	0.149772427170693
Katna1	M6	red	-0.0668972135380273	-0.0774945918221414	-0.0592297794425127	0.101224556728591	0.110401612457466	0.151620385426333	0.160635180690152
Gm49767	M3	turquoise	-0.156100374994398	-0.0772248763335111	-0.0291388892253498	0.166912144825582	0.15634885637761	0.127552198832884	0.159240746747519
Nufip1	M3	turquoise	-0.105318541022779	-0.109986860626649	-0.0115335684841569	0.0814309356024291	0.110813721288783	-0.0179612063692106	0.0284881303932412
Ppp1r10	M5	green	-0.111479795322955	-0.142760716308776	-0.189955374091963	0.205501395029966	0.142168833115155	0.489086528378231	0.373174622760557
Nrg1	M2	yellow	0.0398302665080342	0.0329334189356612	-0.0401212184367831	-0.0326219460305713	-0.0472141873024284	0.00922984280313209	-0.0422057764903269
Pbld1	grey	grey	0.0318294517765354	0.00913565421366599	-0.0516598222843416	-0.00850753635705492	-0.0237140557094338	0.0506067321132667	0.0366690301302483
Prrx1	M1	blue	-0.290614854229783	-0.180161766011776	0.120203439432461	0.202612066553802	0.241059157348053	-0.0639817387420875	0.104182757426538
Angpt2	M1	blue	0.00396020362851819	0.0192203342901303	0.148549841603065	-0.111278009081594	-0.0273411007212778	-0.0303117971891349	0.0155719043497338
Lrrc40	M1	blue	0.0348134992245046	-0.0375273083917673	-0.00517486871291142	-0.0730427316945564	-0.0413818523078398	0.0125741701337048	-0.030103773474827
Svip	grey	grey	0.0172401459637446	0.000984036004605722	-0.0489966162133077	-0.0145008817415909	0.0153897172228066	-0.00017140638032236	-0.0525716434676988
Epdr1	M1	blue	-0.156305938759616	-0.100956361578289	0.0842121233533764	0.113031823918037	0.096488544000649	-0.0310537784947468	0.0679154868579031
Pcdhb5	M1	blue	-0.0777413007948005	-0.0749584917804027	0.0580142384285097	0.0299162097351443	0.0184404973444321	-0.0774344828097292	0.00629372951915259
BC037039	M5	green	-0.0502673977225533	-0.0235639841465128	-0.0431463286336655	0.0735407660824223	0.0431413740580042	0.0778047490288412	0.0603743921459443
Lrfn3	M1	blue	-0.100843163721317	-0.0608061603976137	0.0401071125692554	0.0621739743050076	0.0698583754777375	-0.00522060708495475	0.0768329893052499
Cmah	grey	grey	0.0310675602311759	0.0346184934525127	-0.0662766793991962	-0.0154676287373582	0.0232259024841045	0.109489416358676	0.0390266038398503
Zfhx3	grey	grey	-0.0830335125199852	-0.0607352790336251	-0.0343374320075693	0.0513361770349087	0.119695159474552	0.0607635104328664	0.0985510791152536
Mylip	M5	green	-0.0553293734642537	-0.0673423629815916	-0.108427735631556	0.101794579895243	0.0963083407270836	0.190975813474856	0.143829171742545
Cyyr1	M3	turquoise	0.0905471063599761	-0.102610849551853	-0.56380510383464	0.0195643182465416	0.0931651776616459	0.241212495830662	-0.0170802898536436
Lhx6	M3	turquoise	0.128974499808769	0.0915429497145114	-0.183933813996906	-0.057917344246597	-0.0680964009631586	0.063130615935328	-0.0701972030213179
Sept4	M1	blue	-0.762845681963098	-0.571245009258715	0.198954060836668	0.599767827852435	0.611612757913927	-0.0700023559106781	0.293166127569979
Tox3	M3	turquoise	-0.101346844005318	-0.145726807739227	-0.160922890705952	0.116928552873187	0.161540832326636	0.139119664821893	0.0649207151067253
Piga	grey	grey	-0.159838127661035	-0.105918244444044	0.00161509781382562	0.170517562975379	0.179139231832441	0.00575450156879273	0.107370528698764
Dll1	M3	turquoise	0.0838767368609288	-0.0601766232535001	-0.300972474036138	0.000916317684805025	-0.00382568740300614	0.227128135075107	0.0387910842149981
Fmo4	M5	green	-0.016607912237462	-0.0160335407893727	-0.0716885653339466	0.0373088167608289	0.0478427698798091	0.101859517234048	0.0811863407602856
Ildr2	M1	blue	-0.0909298584445395	-0.0987950600755548	0.0358845652728554	0.0544535199533466	0.0576219234840886	-0.0638553707841169	-0.00500796742176108
Gm38287	grey	grey	-0.0397103857078878	0.00264462616069941	0.00671272163383684	0.0301841576107922	0.038320803925971	0.0369551564528561	0.0390253969683091
Itgb6	grey	grey	-0.0630257815080139	-0.0699812568347785	-0.0105421876421428	0.0540329492968566	0.0437957660546019	-0.0289908377418904	5.5850886718537e-05
Large2	grey	grey	-0.0551278619237766	-0.0216149674285251	-0.00164566336251571	0.0455579334020346	0.039387109831928	0.000524986513002956	0.0501364522724616
Dclk1	grey	grey	-0.0579351368391057	-0.0205621108442616	0.0535565511365062	0.0602295697479358	0.0504081734562628	0.0160847471948761	0.0431788403886136
Mlf1	M5	green	0.0366417005320398	0.0189215299730922	-0.0660416356917092	-0.00128893013577947	-0.0207097057797042	0.0435456411099402	0.0494371888065825
Rab25	M1	blue	-0.0272863182051325	-0.0819484808497452	-0.0108724821074362	0.0300132077519856	0.0366447019303258	0.0402601749081977	0.0247377920679381
Sema6c	M4	brown	-0.0605003372944443	-0.0239357647737385	0.0156929406679748	0.0867529855572394	0.0702143700857466	0.0421901701979674	0.0838300539415245
C030032O16Rik	grey	grey	0.0242881441248117	-0.0319846435013241	-0.0790306438863099	0.0263254058558519	-0.0158409213578896	0.111076372101072	0.0525339329601001
Epha7	M5	green	-0.0498615796379044	-0.00935987483167309	-0.000183297398342411	0.076552480144595	0.0773235136203398	0.0615561977085328	0.0790474657233931
Cnr1	M3	turquoise	-0.0713440624796066	-0.0124259142055773	-0.017615974362579	0.0580204332307374	0.0837786828510776	0.012928251631453	0.0023469189995002
Foxo6	M3	turquoise	-0.0198186333046894	-0.0187464227553505	-0.0580546869981508	0.018062795830587	0.0189787541434401	0.0704705642122471	0.0692179448801138
Gm12981	M5	green	-0.0459748100555929	0.0425031364153571	-0.0192606850056153	0.0836889462228997	0.0687446054078272	0.0754409905029186	0.0997718727348149
5430403G16Rik	grey	grey	0.0340600697617455	0.0110756209151818	0.0243716522806947	-0.051555376033289	-0.0343721377426316	-0.0400372759950943	-0.0452401042735152
Oas1a	M3	turquoise	0.0350802934901129	0.0280532526465271	-0.0746066359702739	-0.0330855105122613	-0.0295427908813333	0.0859960899260341	0.044045738427639
Lat2	M5	green	-0.00288080682068648	0.00100427999509388	-0.0346515086903013	0.040257157445839	-0.0273084317076584	0.0709705911146732	0.0683454863036018
Alms1	M5	green	-0.026532662634658	-0.0122638244191617	-0.0361292391773587	0.0377557974872628	0.0415192583047081	0.0579261778202081	0.0568379338950348
Gp6	grey	grey	-0.0654031791643088	-0.0301999372383122	0.00337522450132973	0.049923286485704	0.0598901459275129	0.0125013990743528	0.0526335813672032
Itgam	M4	brown	0.00216538270766425	-0.00586864739290491	-0.0161645554212361	0.0287785925321504	-0.00570737609890792	0.0753176618393467	0.0754813333921296
Hp	M1	blue	-0.102316588102622	-0.0785617446054873	0.0386709245161631	0.0989649333639466	0.0873018836068232	-0.00512448692976926	0.0621656940200529
9530077C05Rik	M3	turquoise	-0.00735005078654327	0.0358768279384768	-0.0702321567125055	0.0204538416511716	0.000974511533559703	0.00176329162149655	-0.0113081451730253
Gm2449	M5	green	0.0402470464044112	-0.00500047318480219	-0.0743908995815799	0.00924313851654741	-0.0238772818181484	0.114414856589036	0.0531752181336108
E530011L22Rik	M6	red	-0.099479041211261	-0.0521458878285599	0.0308209510467955	0.0966818094354902	0.0800459837817712	0.0548131527980154	0.105564739583421
Rab32	M4	brown	-0.0186016071492469	0.0322782582019429	0.0353845124347549	-0.0162135986492517	0.00124463903087387	0.0295481964240182	0.0310292552356644
Gnaz	grey	grey	-0.0426810076601473	-0.0775892326758007	0.0332887530836163	0.0295757394365363	0.00471121968341288	-0.0172273446478739	0.00838294561224521
Slc41a2	M4	brown	0.0422256782573202	0.0433770628541873	-0.0198485435112302	-0.00282138286182289	-0.0442575773760937	0.0881661477340401	0.0683940354710395
Gm12195	grey	grey	-0.0836629392062263	-0.0848026370017197	0.016120007824275	0.0584811671750724	0.0513379613534952	0.0123488586985915	0.0372638484536701
Lyrm7	grey	grey	0.0562860565474018	0.0589098289762446	0.0297436789652562	-0.062369516442587	-0.0781232286449662	-0.00849159061383429	-0.0225224981842064
Usp43	grey	grey	-0.0343914387090854	-0.0758903823357651	-0.0226845903866695	-0.000802154605269517	0.0443945676495836	-0.0508646361559827	-0.045708075899631
Rap1gap2	M6	red	-0.0331804510535991	-0.0112594497785619	0.00733499396245235	0.0638541544269521	0.0222127591185623	0.0813363670665432	0.094696306277824
Slfn9	M5	green	0.0224975497748106	-0.00369095849595337	-0.0427362364261422	0.000976263667120321	-0.00993132612125613	0.0510080154745767	-0.0115220343751684
Brip1	grey	grey	0.00420420790595371	0.0106057975464352	-0.0479664751107738	0.0175314877803868	0.00877442130157434	0.0378284603466784	0.0333150085375934
Lratd1	M1	blue	-0.105162094745675	-0.109017724571851	0.046649125135548	0.0987746536591999	0.0998479580965259	-0.0202027090033154	0.0517444967266179
Gm10457	grey	grey	-0.0426234057646163	0.00890591540730853	0.0570667798451782	-0.00318747963961541	0.0265619930972953	0.0145454995705749	0.0659916415999465
Homez	M4	brown	-0.0985849579465336	-0.0721101818229365	0.0721042601534677	0.10602648074798	0.0613731492060678	-0.0286321489896103	0.0675670436819316
Adamts12	grey	grey	-0.0576202001873852	0.0075476838531627	0.041303614482952	0.0572773880216085	0.0897002313546985	-0.035338248295506	0.0130866627333173
Mroh5	M2	yellow	-0.0196085968103954	-0.00438907548728963	-0.0307686802516205	0.0297355161847831	0.0481677520126246	-0.0225546406205194	0.013477584622356
Gp5	grey	grey	-0.0487281314251396	-0.122603691076831	-0.0317215971250982	0.0237268079820199	0.0797526684812664	-0.0219176631877364	-0.0312210134029218
Ly6g6d	grey	grey	0.0626445705367813	0.0189326624865795	-0.00712479558458335	-0.0441839307369068	-0.0320401102907099	-0.0184838445016407	-0.0417526875327038
Pcdhb19	M5	green	-0.0173738543758213	0.0415638982319921	0.00128651397143731	0.0273826505281276	0.0302034981725907	-0.00618751123837735	0.0238649332968651
A330084C13Rik	M1	blue	-0.0869553333550709	-0.0539900743092671	0.0851790183297244	0.0583124905731628	0.046536899964351	-0.0225741393264346	0.0383655304864236
Lrfn4	M2	yellow	-0.026770832599731	-0.063336711749343	-0.0439628612139643	0.0199057168529202	0.0299455643800752	0.00499362961680263	-0.00475343777747856
Peli3	M2	yellow	-0.0858746478125104	-0.11582319338056	0.0147526797410746	0.0474648102094855	0.0587363888953044	-0.0378094267226845	0.0178494736355551
Ifit1bl2	M1	blue	-0.0251656057393559	-0.0340814446779591	0.0246561995961726	0.0299844233320025	0.0231292111298046	-0.0322762918078415	-0.0108971607735317
Abcb1a	grey	grey	0.140593315046522	-0.00643654916184529	-0.269353104196484	-0.029045666504883	-0.0531988938922632	0.143552806096012	-0.00385139364088495
Megf6	M3	turquoise	0.21206521865279	0.141386352423742	-0.102548855347294	-0.162080599470973	-0.239721454132558	0.0870389949643875	-0.0623934024479847
2200002D01Rik	M2	yellow	0.0900744978294308	-0.0277871284233048	-0.127008520188099	-0.0460513020538917	-0.0811689408449003	0.0882109804901914	-0.000195833495362749
Mal2	M2	yellow	-0.156019273354269	-0.272579880375827	0.00293205937419162	0.122613861263003	0.145662998368208	-0.0300350428563426	0.0156950992903414
Adam10	M3	turquoise	0.230233543270367	0.20307264083292	-0.0734147171829285	-0.218561087568133	-0.288782015120053	0.00388284305177601	-0.0921558146920559
Ntn1	M3	turquoise	0.360366379604572	0.247942247933258	-0.130782907274097	-0.373602538759156	-0.351113254429595	0.0387080898610342	-0.130211841056397
Cav1	M3	turquoise	0.23222049643888	0.00688827396395588	-0.480457894846064	-0.129641760423228	-0.176260374027719	0.19019600312541	-0.121511713999907
Nbl1	M1	blue	-0.31094823139975	-0.219773501129498	0.0834693581549063	0.249926493351901	0.21931838544508	-0.0335804053282977	0.128426298851133
Fam129b	grey	grey	-0.0626598340641797	-0.172540798116798	-0.116861195884445	0.0958137508621147	0.0730846317835657	0.109065790388528	0.064790069229932
Runx1t1	grey	grey	-0.334863514499391	-0.185309994963439	0.0508556040243613	0.275969162019354	0.370331502697262	-0.0469262401679849	0.146641953344744
Stx11	M2	yellow	0.000193220079626173	-0.0920132737633346	-0.0518080419287445	0.0285501942237999	0.0254053501641523	0.080827189240984	0.0553913532461579
Utp23	grey	grey	-0.0634811109370427	-0.0532079287773454	-0.00677382299546357	0.0236641664605851	0.0431251483251639	-0.0390340220609135	-0.0326863678754362
Ankrd26	M1	blue	-0.00996453472102126	-0.00437210011564447	0.00715817044013375	-0.0197502286654546	0.00222497175501469	-0.0822313283590272	-0.0556717450087189
Kcnh1	grey	grey	0.113914481330632	0.0612621376604396	-0.209162954241095	-0.0424617491699891	-0.0228928863658543	0.091439330435965	-0.0059829910807906
Gpr153	M1	blue	-0.29010335563131	-0.206431816579376	0.0486637610940878	0.210418230483446	0.234777881227302	-0.0371187838793441	0.0727791369979491
Sh3pxd2a	grey	grey	-0.0999737634247171	-0.228431423459127	-0.212278175146015	0.0948713701446657	0.197640875202107	0.0670648690221774	0.033306305486318
Gda	grey	grey	0.218281536303636	0.156023657678164	-0.154219854781148	-0.117624426476221	-0.221496358798378	0.100657003138368	-0.0197492348604716
Dnm3	grey	grey	0.121758585327688	0.0746350750925985	-0.178176214229967	-0.0532066299556642	-0.0632395232985117	0.0712897824671123	-0.0381480506396552
Ctsc	M3	turquoise	-0.0277442365068411	-0.0592054371107687	-0.191354001476012	0.0589108977869159	0.102026971929938	0.0954596227142584	0.0542551861091831
Lmo7	M2	yellow	0.0127986681392343	-0.138331332408971	-0.123526777401553	0.0208619550382793	0.0110190906034044	-0.00643936517736817	-0.0295651154386941
Kctd12	M3	turquoise	0.231228778357229	0.179402687642425	0.0124214366482561	-0.288251965732528	-0.250621844576764	-0.0324428715428281	-0.0884058923278379
Rreb1	grey	grey	-0.0713595843455862	-0.043629987264675	-0.0379803619626051	0.100664177027141	0.106864695700548	0.0700048101208449	0.110587028260974
Hmgcs2	M3	turquoise	-0.181867014575531	-0.0915866721736835	0.0117389960820356	0.168597406926378	0.165263350623581	-0.0153127356281966	0.0738221309385179
Gata2	M3	turquoise	0.0881040587341259	-0.103390733044827	-0.474606609897912	0.0285416595107487	0.0624984358939335	0.252078240933378	0.0379472931575926
Gm50136	M1	blue	-0.085656732298741	-0.0741871650171951	0.016296545130461	0.0605812172641209	0.076953492087058	-0.0176512409660852	0.0133705170146595
Kcnk2	M1	blue	-0.104260423692671	-0.0352386086227443	0.0610749940666652	0.106258936864375	0.0698479037862794	-0.00256522854859353	0.0532047016228316
Nap1l5	M2	yellow	-0.10368260214459	-0.133728310143434	0.0288089019514877	0.10361678119933	0.11253147514541	-0.0243303520856868	0.0392944790022871
Zfp169	M4	brown	-0.0292491568782321	0.0204335708164234	0.0378313373915591	0.0487777045636357	0.0184644016026336	-0.00550968962865456	0.0485827216077356
Ephb3	M3	turquoise	-0.101612270181263	-0.0574667476645198	-0.0211386920191569	0.078307615437202	0.118369054972082	-0.00256226874092308	0.0627740023958491
Igf2bp2	M4	brown	-0.0736200681877876	-0.0494825495737196	0.0059529268583157	0.0764512898512767	0.0414730159492316	0.0288043103759379	0.0497128130584945
Plag1	grey	grey	-0.0843790686762424	-0.0690711776544659	-0.0201641349908421	0.062903775421508	0.0921664115177335	-0.0173486069825126	0.0329101687175372
Tgtp2	M3	turquoise	0.0631620440464794	-0.0152730808451151	-0.120851144459465	-0.0485032101231222	-0.0187700736585425	0.00584127765198064	-0.0660295230464153
Gm48302	grey	grey	-0.0550855693653417	-0.0401087103047745	-0.0286846840944976	0.0639035343517186	0.0848946032324025	0.0533004086889297	0.0703535877244418
Def6	grey	grey	0.0270199857209177	0.00719434794939084	-0.13053014163773	0.00531443758329058	0.0504719106411072	0.0529845114185529	0.00872468757893941
Kcnk7	M1	blue	-0.0204604758470131	0.00243917053534854	0.0383612347117773	0.0203752879855189	0.00137381555919211	-0.000583888284674168	0.00770720696732012
Tmem35a	grey	grey	-0.0688872252502867	-0.0377835397856078	-0.00388184769722145	0.0933612432336387	0.0875137500887001	0.0288302817588672	0.0630711717299558
Flt1	M3	turquoise	0.0261342716439136	-0.175244104335608	-0.525892931579747	0.105774361050105	0.0740056855762041	0.304267709127599	0.0229962554968525
Ramp2	M3	turquoise	0.201780695773783	-0.0255370606700642	-0.617837657729416	-0.0411723382915325	-0.0933216267074444	0.240711383346239	-0.102866830636645
Akap13	grey	grey	-0.127714568410421	-0.0840257358954589	0.00296210548901712	0.12516877267164	0.105631607550956	0.228249280796165	0.206977008906943
Sik1	M4	brown	-0.0214674063433798	0.026848607702275	-0.0528376113786522	0.100045341951709	0.0191832329000106	0.185153381403616	0.178357570691406
Nbeal2	M3	turquoise	0.0667154076815308	-0.00946254848534699	-0.0498848279779817	-0.065947141498079	-0.0563496608621478	0.0170823895704258	-0.0343101881622709
Gm49359	grey	grey	-0.0781569032550894	-0.0668204796887315	-0.00700141340123838	0.0702261116157191	0.0619983995814277	-0.0199984874640053	0.00886703063258458
C230037L18Rik	M3	turquoise	0.0196340348963253	-0.0437232996874668	-0.103900325549707	0.00189695436357212	0.0119494397955721	0.0983684084271153	0.0556780659917276
Asb1	grey	grey	-0.0325689223546889	-0.0905909920171822	-0.0760747289711118	0.0570130711382279	0.054093302937553	0.0262240547961819	0.0140886154654748
Kif23	grey	grey	0.0400936745176284	-0.00375408026938895	-0.0763603060573671	0.0192616594978952	0.0103201560644804	0.0689847643775792	0.061933315475299
Esm1	M3	turquoise	-0.084549207776313	-0.0975410186546863	-0.0525342435931577	0.0480495121799461	0.0892513661922908	-0.00165514975523591	-0.0150357321683468
Ift81	grey	grey	-0.0747124306878726	-0.0380072825622573	-0.0365220980729589	0.0403991054760196	0.0803552355899356	-0.0140729971663615	-0.0155617681796859
Vegfa	M3	turquoise	-0.208353308742064	-0.267951666966383	-0.288517008139624	0.282457647860663	0.231404744621203	0.322695813493855	0.258542241596097
Pcdh1	M3	turquoise	-0.0357184472026427	-0.140073231996509	-0.329442799098149	0.0872075557323313	0.169710656759259	0.134684189192181	0.0173984786395138
Tango2	M1	blue	-0.240870697424434	-0.148325575004746	0.0648421970400667	0.205029430915766	0.191607195073051	-0.0156114561198214	0.0993020991743144
Car2	M1	blue	-0.460344498577377	-0.301622314726079	0.0952379974048972	0.354487386590358	0.386539794851429	-0.0357537488477305	0.185869330705386
Smad1	M3	turquoise	0.115462885129168	0.140684174013868	0.0739980251928346	-0.196047007507322	-0.11120850010921	0.0223882541394601	-0.0283949245674126
Rhoj	M3	turquoise	0.259050131112769	0.156621243199591	-0.26992111206026	-0.188232881483147	-0.161401840414899	0.144635471842904	-0.0629842024152941
Gria3	M1	blue	-0.355104384913227	-0.180104411055284	0.132876292358943	0.285287913284963	0.286567274487648	-0.0324253255963477	0.172030135394053
H6pd	M1	blue	-0.559103648350546	-0.332022980942174	0.196898186994846	0.42493614467081	0.427328583572878	-0.0796790214816153	0.224673331657002
Reps2	M2	yellow	-0.277073041062862	-0.246624077758813	0.0381617089249504	0.220506354431507	0.237161809580243	-0.0348859407856949	0.0780073854394165
Lclat1	M1	blue	-0.315295078815006	-0.235809525843289	0.0940185254871046	0.247488355003556	0.260468110196679	-0.0572691187255245	0.125648335790278
Dmd	M1	blue	-0.348090912401008	-0.165888790959727	0.106698079138907	0.257624006523627	0.255223808380086	-0.111833038450354	0.106303454286572
Prkcg	M5	green	-0.0357889381641822	-0.0472180772916289	-0.0634458539971034	0.0966356692336191	0.0475796777082295	0.159877008152607	0.130002517937225
Spryd7	grey	grey	-0.0510598633059239	-0.102971814512659	-0.0654785722535966	0.0243727345445609	0.0670879527141149	-0.0666654008070753	-0.0637686849999101
Isg20l2	grey	grey	0.0454614495986633	0.0343828856358615	-0.0956083845578332	0.00449276980357698	-0.030919985027888	0.103298757289187	0.0542415983545589
Hist1h1e	grey	grey	-0.00171189683276791	5.84771409795931e-05	-0.0963636064209174	0.0118888742810669	0.0323458506377109	-0.0370505928243588	-0.0756096386247933
Amph	M1	blue	-0.257734345913471	-0.166590514879325	0.0381001196484018	0.204514053486715	0.261056482843771	-0.0553404055257057	0.104177774516936
Casp2	grey	grey	-0.00189571583480984	-0.00923193449810586	-0.0662151206293089	0.0219601526686314	0.0327173852182292	0.053605812635567	0.0133648754736815
Omd	grey	grey	-0.17172134405786	-0.0672380602958418	0.0673100717229787	0.147583964199202	0.141061521548507	0.0382372627095621	0.0950821084735228
Ttc9	grey	grey	0.16852987650199	0.187028634336712	0.125066064320181	-0.288964246925387	-0.236974952618454	-0.13125372142109	-0.167422984522098
Sqle	M3	turquoise	-0.0647230675922185	-0.0544191326766853	-0.0555166484113034	0.0735880564382255	0.0881553727666145	0.021186035202764	0.0372327041519583
Pcdhgc5	M3	turquoise	-0.0515942326316244	0.00581802595018848	-0.0880530547069434	0.0728455868303592	0.075747511317672	0.0916925462410565	0.097430221538826
Azin1	M5	green	0.0722483963277738	0.0491553452065097	-0.128756653685623	0.0566447171651352	-0.0822157745036911	0.295748550941218	0.218035565463478
Tmem45a	M1	blue	0.141904515164373	0.125944808474961	-0.20395917315221	-0.0293888248771078	-0.103387261050918	0.0883904940300315	-0.0052444386665127
Cyp26b1	M3	turquoise	-0.011842584684384	-0.0507413336736112	-0.140434344604691	0.0753009713786699	0.0266714377538179	0.136598506461644	0.0870780624746314
Uvssa	grey	grey	-0.0593036905706982	-0.0145408039379913	-0.022098304684167	0.0741579329193331	0.0707183763758443	0.0263100021022482	0.0282743898472216
Fbln1	grey	grey	-0.184847766166273	-0.0969647730460531	0.065436586456331	0.177755216146601	0.128662601415808	0.00408160756986998	0.116911709316084
Kalrn	M1	blue	0.0747811883624648	0.103277080226673	-0.00518614958524179	-0.0818997583776019	-0.0825966462298261	0.0615453039016027	0.0441734866255499
Nek1	M1	blue	-0.0175603074532056	-0.0579407624238471	-0.000177731359069302	0.00987285034204703	0.0169549647111728	0.0106645388483458	0.0072370587384051
Ptgis	M1	blue	-0.523423452977568	-0.336322235510449	0.0571256991395006	0.504406219780507	0.363115131672615	0.0930546123414622	0.298786471697063
Cst3	M1	blue	-0.610003307803944	-0.413851863638881	0.147282786443423	0.504586093437033	0.357609480747549	5.46151022333122e-05	0.263217639617025
Wwc1	M2	yellow	-0.118957147759433	-0.285432752592895	-0.0442815928126577	0.082033422762918	0.166791670513666	-0.0283934361878717	0.0011164004552479
Lcorl	M4	brown	-0.00866775598632089	-0.0556668893507745	-0.0720067348731085	0.0362013955016642	0.0254985529778335	0.0481516491662435	0.019466301901092
Ogfod1	M2	yellow	-0.0468734689171707	-0.0490221244866539	0.0119379766685844	0.0453741690991744	0.0608463933400727	0.00438255321632088	0.0538561779168283
Nrcam	M4	brown	-0.127640120752811	-0.0311060043505054	0.0878576388683426	0.121056361154	0.0997379476777641	0.00766499425464725	0.100196853279246
Tmem41b	M4	brown	-0.121858653231539	-0.0459854043025185	0.00862154231816268	0.12366468073261	0.094271075737225	0.0429082569171783	0.119062395186507
Gch1	M3	turquoise	0.150549462004621	-0.0107698729050661	-0.285511208594931	-0.023252368184305	-0.0831284093128389	0.244278705248851	0.045504511589574
H2-DMa	M3	turquoise	-0.00232791318194315	-0.123891713256324	-0.285088910827034	0.057608994839922	0.0970749624947911	0.0989520475212078	-0.0117188436758581
Klf15	M1	blue	-0.533248474256162	-0.336311920777954	0.205219391432912	0.426913511856902	0.429083144697744	-0.067205986031029	0.205758595268061
Sh2b2	grey	grey	0.0734759324521499	0.0644735532885263	-0.123601124500924	-0.00027013812287717	-0.0348801161717215	0.0811687105109386	0.0290046339099647
Ssc5d	M4	brown	-0.138644919276124	-0.0596590774325247	0.0632759878643089	0.136472077806525	0.117851631283032	0.0473440757648565	0.109046870287268
Ly6g6c	grey	grey	0.000689203634404501	-0.0650416546292622	-0.0816174478963142	0.0299912720403235	0.0474915664426889	0.0304094846263157	0.00421450843494218
Helq	M3	turquoise	-0.0768021796648042	-0.103868229211299	-0.059126082583555	0.0706022516803552	0.0747053044464232	0.0546825599884793	0.080924189778116
Tbx3os1	grey	grey	-0.103731448643155	-0.0670506459290196	0.00825567610745857	0.102750696767951	0.11887525658585	-0.0268915628015067	0.0568907848970802
Zfp428	grey	grey	-0.0309456180286687	-0.117301521181412	-0.0786453895722396	0.0141866860307848	0.0738930082172594	0.0436893295628627	0.0170717920949522
Pcdhgb4	grey	grey	-0.100732337739621	-0.0281341257020507	0.0475837209389242	0.0853272219182981	0.0661693266545726	0.0250380628379596	0.108992821505448
Itprip	grey	grey	0.185674057185845	0.114153685467674	0.0102919610542652	-0.25493280982657	-0.218084510573172	0.0503061859867809	-0.0274824690587814
Lsmem1	M6	red	-0.13308829925426	-0.016638769510885	0.0357592312984914	0.173852986536025	0.126015615547875	0.100970024878457	0.265665214333011
Hlf	M1	blue	-0.242826990000199	-0.142108911952023	0.0817447813745942	0.193845559380193	0.187480201800407	-0.0316705021259825	0.119348263679021
Twsg1	M2	yellow	-0.378921082667237	-0.322622251485364	0.0656058897395666	0.287199465139661	0.34235431504282	-0.0746958117575912	0.0922894135425236
Npl	grey	grey	0.0635603519439797	0.044644584291561	0.060109920962037	-0.122825514577438	-0.0997952250473562	-0.0313063097294415	-0.0390150607651943
Pogk	M6	red	-0.0631512364219932	-0.0698143801014215	-0.0243307414571597	0.0499968075941792	0.0703129843788097	0.0423971169365602	0.0847655359987645
Pank4	grey	grey	-0.0527232154122248	-0.0772387902802389	0.0105901923572967	-0.0138551220832881	0.0407894440722665	0.00458975370746182	0.00192828056450679
Rassf3	M2	yellow	-0.049834793181061	-0.29066989932157	-0.127088780201793	0.0325924925611302	0.132641378909568	-0.0169550286953479	-0.0445728167973668
Mmp2	M1	blue	-0.427831066889534	-0.255549794276013	0.126369277158672	0.386142785529074	0.334618141282293	0.0379181771867418	0.266414962706926
Chst2	M2	yellow	-0.334724737728164	-0.319042462477146	0.104098801310516	0.248598221974192	0.311728717923408	-0.137156339883906	0.0619358783717011
Csrnp1	M5	green	-0.0210906578416085	-0.0795057860744184	-0.318774979890936	0.217504576033756	0.088555160823625	0.648688841977034	0.41711057859311
Abca8b	M1	blue	-0.26485847516228	-0.166246237036085	0.0679094319558822	0.214540239846689	0.21717325364157	-0.0469506292782442	0.100674203470688
Usp24	grey	grey	-0.0110421471009214	0.00175712740144676	0.00251530632994588	-0.0119958297351632	0.00471044020284059	0.0678669975622578	0.0238899690249632
Slbp	M3	turquoise	-0.100419001437162	-0.0901653989579404	-0.100606708375345	0.131912951334849	0.116133270533527	0.0686233086774465	0.0888648457298416
Pkp4	M3	turquoise	0.0777610982880217	-0.0637766100077107	-0.176348472995207	-0.0391639886440983	-0.0295902629735809	0.104778290549149	0.0267319768571608
Smpdl3a	M3	turquoise	0.24804189829904	0.132693989871863	-0.26077363669985	-0.11425161312812	-0.22921059147706	0.125285217547422	-0.0449530766763063
Trip11	M5	green	-0.0979164951571075	-0.109490168865987	-0.0540729039613807	0.121346913446908	0.0985612019016261	0.138777248987667	0.153977219837579
Cd3eap	M1	blue	-0.0206392856192085	-0.0539519183378283	-0.0237397589256696	0.0301385587416404	0.0178974943098416	0.0259632720200164	0.0530365689115922
2610008E11Rik	M1	blue	-0.0556945354335691	0.00604905649289401	0.000377420079446481	0.0516529006374517	0.0646199266083143	-0.0230883035957215	0.00706729010662831
Trib2	M3	turquoise	0.0562677472943341	-0.0453955898486537	-0.213888212834933	-0.0383676816843288	0.0675165784597894	-0.023959103535074	-0.0945169562481851
Bst1	M3	turquoise	0.239232413702743	0.119872072683401	-0.303571147340097	-0.0961457722103227	-0.120144381877751	0.0988081942162375	-0.0993506181808167
Sp140	M1	blue	0.00647322648535949	-0.0464882805338673	-0.0879028993445055	0.0247114448987939	-0.0328226627172496	0.00148509142353105	-0.0455085461063348
Spry2	M6	red	-0.0463099573996729	0.0365699491714348	0.00988424967601417	0.0960665573519506	0.0190062523377222	0.150520967967534	0.194194149707349
Ppp2r5a	M3	turquoise	0.153049806458953	0.0633598617051388	0.0265169412728229	-0.246525953975906	-0.146804228652562	-0.0206699719329375	-0.0692982499955461
Sestd1	M1	blue	-0.10373583754482	-0.0291310413884143	0.0623063327202797	0.105978945335347	0.0911470141980831	-0.00986078044388131	0.0805549830856485
Tmcc3	M3	turquoise	-0.148863062493192	-0.2141916027815	-0.31253784567843	0.224461447113472	0.253198703809836	0.193110924311425	0.127502032140156
Rnpep	M3	turquoise	0.0880993212944998	0.00987871731618432	-0.177621346276013	-0.0504889365689733	-0.0598320061141239	0.0675819740453506	-0.0199590364978668
Plxna4	M3	turquoise	0.172710469245356	0.153735587501839	-0.11848669808691	-0.0985798816367926	-0.195441005547525	0.0897522355198277	-0.012032955931149
Dffa	grey	grey	-0.00203379787891147	0.0111977189098719	-0.0146793095501442	-0.0100503275058526	-0.0204544950349229	-0.0494861757838099	-0.0386909572167459
Ndnf	M2	yellow	-0.160042006234341	-0.159860231490514	0.0627915243937703	0.0965635825234054	0.131267457164651	-0.102586160640767	-0.0118870132308091
Glis3	M3	turquoise	-0.0998085706882731	-0.0874919228831388	-0.0482584482929067	0.0795415747659419	0.124860291870472	0.0165393707903463	0.0505126391718892
F10	M3	turquoise	-0.0670567280480905	-0.0508288909732285	-0.129496694708707	0.0837519500036679	0.110953608530564	0.135585476526983	0.121392137877609
Creb3l1	M4	brown	0.0140657958560946	0.0387681521792855	-0.0129638499727948	0.0597756556290802	-0.0432684402025626	0.0671797617569893	0.0921339835425153
Rpa2	M3	turquoise	-0.0410241998029693	-0.0500647870089066	-0.0151707290261511	0.0223436848989054	0.0447390875425755	-0.0296802846103641	-0.0103964414154291
Zfp462	grey	grey	-0.0626789122812377	-0.0114227879672909	-0.0420922703784699	0.0825587717577904	0.0916736481416609	0.0285168871729363	0.0463513493949324
Cep83	M1	blue	-0.147973196574171	-0.17027061346522	-0.0453469493171947	0.105285268361818	0.124607354560282	0.00872542796887027	0.0642617089527368
Tns3	M2	yellow	-0.424818223103668	-0.393496307656182	0.0761674236653163	0.319235488044574	0.360494314443679	-0.0550986480512702	0.144707633274566
Col5a2	M1	blue	-0.334274367078746	-0.171210314832029	0.121437973774467	0.231271672634015	0.238615581423948	-0.0766516925986376	0.0814139787328287
Bace2	grey	grey	0.131832687943155	0.0534218997878666	-0.224868852451989	-0.0150673329276614	-0.10434581831535	0.0910486596447225	-0.022444347765398
Flnb	M3	turquoise	0.26190697589846	0.120530016990901	-0.309296399426483	-0.15992639240298	-0.192548784236609	0.16511876837432	-0.0160877959543311
Cd59a	M1	blue	-0.0370393699386408	0.00452438997579552	-0.0229566646659018	0.0867914545387506	-0.0367763223800076	0.0398142255526485	0.0417020049567759
Usp2	M3	turquoise	-0.164704160233657	-0.107190116605714	0.00894430753988889	0.159561957640038	0.170502417115695	0.0629211803375019	0.1583777825484
Slco2a1	M3	turquoise	0.00892523333016263	-0.143911232201023	-0.529705586154101	0.107937589032025	0.0840354532463327	0.245183741615859	0.0145633466964662
Nr2f1	grey	grey	-0.0699358822034009	-0.0448209564754792	0.0436162785857309	0.0201419322265197	0.0316035164957483	0.014683195877754	0.0642426306091801
Gna14	M3	turquoise	-0.0361742847293568	-0.018807679407336	-0.147228452369158	0.0488294216386053	0.0713961709818521	0.0386724894588623	0.000163986596493046
Id4	grey	grey	-0.0904758778501782	-0.0138907468348821	0.00818942028165755	0.10380487873648	0.0495907290479055	0.099989672955987	0.166145830812779
Ptprg	M3	turquoise	-0.0866945268060925	-0.189561233598156	-0.270516005847971	0.143302070915825	0.198692738675393	0.105554114287478	0.0852400165487935
Adamts10	M1	blue	-0.286638185476772	-0.132428167681955	0.0557217273161586	0.25571365863442	0.265566046365551	9.61036395953966e-05	0.14015499375947
Pam	M1	blue	-0.0503524149516943	-0.0364879095447408	-0.0997751128523585	0.0276112028212259	-0.00146845826324509	0.0141411051550202	-0.0324426385677648
Ing2	M3	turquoise	-0.0458554485858282	-0.0674808732813306	-0.105012774098757	0.109615628065597	0.0710690235078271	0.248515642720968	0.230094146544354
Vgll3	M1	blue	-0.394781607892107	-0.23377564004278	0.105307506640437	0.325508247438715	0.319694436346933	-0.0227079584952484	0.187062201297154
Dbp	M1	blue	-0.31618049539519	-0.208590612658525	0.0569352737426119	0.282207386878321	0.248399186795492	0.0123722788676728	0.128840454322687
Tmod2	M3	turquoise	0.0571591014160878	-0.0393178310768222	-0.073837630829796	-0.100103586298627	-0.0358759829506876	-0.0313473112125333	-0.0953237278935812
Ro60	M3	turquoise	0.0186801411522632	-0.0409813007727676	-0.117224454555822	-0.0310199099010005	0.027212998535177	0.0482207588837483	-0.00524379862694812
Alkbh5	M6	red	-0.0771712249696935	-0.0607744755014358	-0.0779131850228018	0.144308567942019	0.0904664002129352	0.229550758939411	0.255220703755043
Zkscan1	M3	turquoise	-0.0429036378749926	-0.0849867890258503	-0.126594603776655	0.0842124592736069	0.0959311154759041	0.0771647941536413	0.0741632652971258
Adamts8	M1	blue	-0.298614125293976	-0.144817040684889	0.128646167009556	0.263556331988733	0.259799046390785	-0.037368600616127	0.155229607764918
Milr1	grey	grey	-0.101248496867029	-0.00872650768859702	0.0110347482258423	0.122698619409589	0.0427646646782778	0.0633748805160236	0.130096974528706
Fscn1	M5	green	0.171337159483159	0.0973400434178463	0.0730089828564461	-0.253467553685607	-0.146743142079072	0.00334283699912544	-0.0405472495637684
Agap1	M1	blue	-0.312902322465834	-0.281745830412715	0.0243497800518035	0.266983634059904	0.287742123607708	0.0303422574786793	0.147671522842819
Cd82	M1	blue	-0.311146717208223	-0.168654911146911	0.0883690214337397	0.302294726623795	0.197729237974944	0.0278871987048673	0.198079456961127
Pdgfb	M3	turquoise	0.0111674243435834	-0.0881742042265493	-0.284426645245399	0.0418038877405515	0.134865633521508	0.134210409433625	0.0272786345607752
Pnp	M5	green	0.148309936554613	0.0515336486308737	-0.312190901613086	0.0127883185788094	-0.0776591394209752	0.397208919948759	0.172665912757874
Nol8	M2	yellow	0.0032960974083824	-0.0107612688465222	-0.0106918067874469	-0.0268250652326221	-0.00484075281484827	-0.00903101184523173	-0.0164646742274353
Blzf1	M3	turquoise	-0.033868438301451	-0.0351033179211759	-0.0459187260087165	0.049840285403156	0.0744385626701703	0.0424086833699123	0.0254395015737699
Col27a1	grey	grey	-0.215779425444205	-0.0755034667722734	0.105486156106732	0.170132525846492	0.155647875443564	-0.0196135572964219	0.113872669249784
Fkbp5	M1	blue	0.056693682569693	0.0781767530193648	-0.00185153399486596	-0.0565522632325067	-0.0574162430590685	0.0128960984474651	-0.00559829893675667
Atxn7	M3	turquoise	-0.050248750230613	-0.0355649331785542	-0.128303632835771	0.0657522495332661	0.103210838877535	0.120316852193641	0.102216636769648
Dpf1	grey	grey	-0.0914834794691023	-0.0508967121932318	0.018923060124889	0.101288202955268	0.0904311773271016	0.0459074660853363	0.100479865445023
Zcchc2	M4	brown	-0.0157594746250851	0.02593789694159	-0.0029776855474078	-0.00929479468699998	-0.00999682467785332	-0.0234500535147927	0.00602512026074188
Traf1	M1	blue	0.115710449504565	0.0495094941776329	-0.0412383138991707	-0.0442335297385222	-0.102923178581438	0.125499105598791	0.0557100005322524
Mdk	M1	blue	-0.199583637077545	-0.130132257107803	0.0959199579891297	0.145350642696743	0.127619299309487	-0.0668891968891339	0.011496698304135
Kif21a	M1	blue	-0.163354068867738	-0.114046417356861	0.0685354155525827	0.154817715167834	0.13357878336038	-0.0305631686933676	0.0809392365038964
Hlcs	grey	grey	-0.0558926149963431	-0.0804939805022234	-0.0551200450285491	0.0562080621300872	0.0613665767496384	0.0336864728883585	0.0425422681247324
Cul4b	M1	blue	0.0602308798664846	0.0525584369519633	-0.0534780106291482	-0.0043530358479894	-0.0708032599196752	0.0196109866960251	-0.00700335139443483
Thoc6	M3	turquoise	-0.0267255029807271	-0.0617618270542955	-0.0887585742362967	0.0527870641978256	0.0490181025401977	0.0900030991156643	0.0722841885918796
Epb41	M3	turquoise	-0.0255697737493632	-0.0980377048756448	-0.344040964899755	0.123494340662597	0.160024022971737	0.205816820444646	0.0848706842122293
Mertk	M3	turquoise	-0.229101009144759	-0.125223573318148	-0.0381296261290309	0.24746272608737	0.225968415081889	0.0913451401055103	0.181251771172586
D430042O09Rik	M6	red	-0.180272700565335	-0.117961362933427	0.0347679338203455	0.185920027053277	0.162138520094804	0.0704139933091208	0.190358337815574
Hgf	M3	turquoise	-0.209039541596656	-0.124837440963826	-0.0153792653972036	0.179189274557809	0.218434688306104	0.0576994306182528	0.128816123148604
Arl5b	grey	grey	-0.0320085675180723	0.0259756430943073	-0.0830352557755318	0.0682845975991267	0.0371777028971696	0.189547735373844	0.160452684641222
Taf1	M1	blue	0.000248199189956874	-0.0446152240507757	-0.0784387655746502	0.00318053683996168	0.00720187759725407	0.0376581460715378	0.0317941640551183
Utrn	M3	turquoise	0.130465641720935	-0.0130294013050905	-0.199217902397773	-0.128271086328919	-0.0955671129840839	0.113357350207116	0.0130677177699836
Hoxb4	grey	grey	-0.0877750279649031	-0.0428278267111464	-0.126656173523413	0.132364184938628	0.116306603686107	0.146012916668459	0.129886900159792
Ezr	M4	brown	-0.338284445532585	-0.186656457240073	0.0480513978174826	0.349622383751145	0.302545229387066	0.0704157106463664	0.213380834254922
Hspa12b	M3	turquoise	0.143630753164795	0.0347378441701474	-0.211757841123389	-0.104699322354471	-0.100880528774521	0.0779018943231607	-0.0509684182071112
Cblb	M1	blue	-0.327350661324283	-0.182614484494386	0.0615063841143276	0.251179415099038	0.280280636344669	-0.00554220903884561	0.163305840070424
Tpd52	M2	yellow	0.0333671171518769	0.0794870457000963	0.0746563967587963	-0.0774531508595585	-0.0914159903475294	-0.0365047052441588	-0.0450618803211598
Crybb3	M5	green	0.108593945385403	0.0763047420993795	-0.0432714464217547	-0.147611219530581	-0.0969201514329413	0.136088955889537	0.0661069482646657
Tasor	M3	turquoise	-0.0404060212950263	0.00432757393346579	-0.104591967989745	0.0541559075147157	0.08906521274792	0.1374244717169	0.1206515522068
Ifngr1	M1	blue	-0.577737961577867	-0.32359333444964	0.192274022757121	0.464270881849972	0.392039738466283	-0.0808620734750056	0.219166239676907
Pcsk5	M3	turquoise	-0.0928556041924548	-0.0341432228628044	-0.117982723546495	0.0974835232118241	0.118491307025278	0.0396475952278342	0.0394425885220858
Zfp40	M6	red	-0.0798676897330921	-0.0368289335445823	0.0194063227457133	0.0837654271419908	0.0616565272219658	0.0138347554061498	0.100880778889451
Batf2	M5	green	0.0713577198142526	0.0239960829139969	-0.10383084101406	-0.0120968795665787	-0.068996570579928	0.14884151225937	0.0599799646371081
Prdm11	M6	red	-0.0616733327518865	-0.0564160641165075	-0.0439478414388697	0.0723193413539605	0.103889336211877	0.0861969872328293	0.0603555615654125
Lsr	M2	yellow	0.0893591667312247	0.0650158021991642	0.024342724489341	-0.0496747033040212	-0.159346382229398	0.0707943883364789	0.00941650103520134
Usp28	M3	turquoise	-0.017242461413142	-0.0283118138736672	-0.0683065737483478	0.0402936751865976	0.0277325494080338	0.0763645092230779	0.0594601516603704
Stat5a	M6	red	-0.0192517779285816	-0.0236838032108333	-0.0328576477412463	0.0509750837953413	0.0152130489742747	0.106396898697587	0.0976881705925916
Bahcc1	M2	yellow	-0.0991028325625283	-0.0770221243025078	-0.0225165818796893	0.0827251122027576	0.114534560248162	-0.0265777036934174	-0.00124126538320746
Wdr35	M1	blue	-0.110632423317197	-0.076909944583312	0.0223042692612178	0.116802563672274	0.0595254505976436	-0.0306551558415427	0.0112630115980662
Trmt61a	grey	grey	-0.0279451820059316	-0.00277671053343135	-0.0450387394177396	0.0120240668517903	0.028627401286121	-0.0258098640436765	-0.0106403225793783
Gpr137c	grey	grey	-0.0765531894783725	-0.0335449579043722	-0.0241255769904935	0.0826844681769767	0.0871804729115417	-0.0083049350319593	0.0579401257441574
Pcdhb16	grey	grey	-0.115232749994018	-0.0866333914990016	-0.000435957275811307	0.0950086487778896	0.11737270557727	0.0259340859826151	0.0508962896479202
Paqr3	M2	yellow	-0.118985347040973	-0.112731665812503	0.00345471914640964	0.117045704726185	0.105786455857658	0.0115751875262284	0.0647674281580513
Hdx	M3	turquoise	0.00292919176220071	0.0114850100534519	-0.0407282493946061	-0.0124972306189089	0.0222409676303888	0.00622943613410289	-0.026022690800524
Cyth3	M3	turquoise	0.0328894758975379	-0.0806602879522155	-0.415724005215598	0.0700153292154745	0.134953693120411	0.229108350221012	0.0744154038584857
Fam102b	M1	blue	-0.12630201232722	-0.105545367688983	0.109795099380348	0.0364730692342338	0.0706523037350495	-0.0014814295686519	0.0621677908168664
Cmas	grey	grey	0.0451160699449005	0.0188567897460951	-0.0759087970749693	0.0106106472353701	-0.119956594263558	0.0711645808601435	0.0281170042731923
Ccdc42	M1	blue	-0.347307648710424	-0.222873807866745	0.0605360808422796	0.262254195597624	0.287309246767721	-0.0302094844017232	0.113997521579275
Sphk1	M4	brown	0.0341371775631656	0.0393510075701921	0.0574631012256206	0.00290144548818091	-0.0832898508524193	0.15174965981663	0.159456130544207
Plekhh1	M3	turquoise	-0.0407407119906026	-0.0042560868383371	-0.0395513408739322	0.0297390040908187	0.0506834393185293	-0.00686460467892613	0.0119731594279708
Slc1a1	M3	turquoise	-0.0646679055410326	-0.0137427838860562	-0.0689768017399262	0.0658692010917463	0.0803820996735696	0.0525952292889375	0.0614554901977817
Pde1a	grey	grey	0.00399791665855011	0.00316143733621626	-0.0430888340417731	0.00530087021654616	-0.000150467760252708	-0.0105332051744728	-0.0172389637728575
Rapsn	grey	grey	-0.154974595254684	-0.101647586108083	0.0209375325155128	0.10805468682356	0.104066454703125	0.00594168464494468	0.0597714160818014
Gabrb1	grey	grey	-0.0483498006012404	-0.0467753452535247	-0.0450680413118314	0.0947990876735842	0.07738780864581	0.0968669586555522	0.112571381247254
Peg10	M6	red	-0.0474900488007398	-0.00610889837270079	-0.00833054780693321	0.0615951832655363	0.0645231649114282	0.10092252962097	0.152234966606712
Fat1	grey	grey	-0.0426217648042261	-0.0562115843327138	-0.037688302456993	0.055255004378099	0.0704616734606718	0.0241419105056234	0.0299416766166452
Top2a	grey	grey	0.0657867563134191	0.0359005061192221	-0.0528688937428366	-0.0359589823097604	-0.0202840723374198	0.0455259307306417	0.0135953689822354
Spata1	M3	turquoise	-0.0179847021427813	-0.0416738356542738	-0.0242259947737168	-0.012858217145931	0.0359445792699962	-0.0528475696825001	-0.040144350364448
Epb41l4b	M2	yellow	-0.120055617470918	-0.102793609495871	0.028618408669774	0.0644410401297812	0.0996257667078751	-0.0362401538438858	0.00393748368544846
Frg2f1	grey	grey	-0.0302978082813729	-0.0345399232728089	-0.0174790344582917	0.045525876329873	0.0525888581910669	0.0230578647299798	0.0706774714026339
Gm45509	M3	turquoise	0.0547725766892277	0.0304030150546441	-0.0332930156516517	-0.0601326843021609	-0.0411797559087403	0.0199774443579699	-0.0231397266213223
Tepp	grey	grey	-0.118682820430184	-0.0291744750405514	0.0373224157725683	0.0955245981637734	0.130671004969421	-0.0454541810555391	0.0380204663080128
Pola1	grey	grey	0.0125583946788828	-0.0550529818037718	-0.0823096713969242	-0.00358131909349961	0.00890453529997875	0.0426336791301783	-0.00760473532578902
G530011O06Rik	M3	turquoise	-0.0833919983489932	-0.0652895547303162	-0.0108546912021152	0.106164797196785	0.0878927968258503	0.0132615621218695	0.102412677629418
Zfpm2	M4	brown	0.10812012773882	0.109273889797286	0.0388135677035795	-0.155716341838982	-0.15168379309986	0.0353261513062663	0.0317683861232128
Spast	M3	turquoise	-0.102776270486734	-0.0930681460617565	-0.0217843933078758	0.0644472052242135	0.0816298811689505	-0.0182543626668043	0.00957588192430193
Acvr2a	grey	grey	-0.203998372618141	-0.143408206610435	0.00147296571319087	0.195735267493221	0.276967627738787	0.0478469874290905	0.131372052774676
Efhd2	M5	green	0.0151210930917748	0.0242398943308191	0.0199082203529573	-0.00861929218076329	-0.0559689907919006	0.137012734446949	0.110416174476603
Dab2	grey	grey	0.113621225978718	0.106775492887479	0.0144191136977284	-0.143492644244186	-0.129565450408284	0.0463331671244122	0.00230005047986234
Pgm5	M1	blue	0.168116715927434	0.111673801406878	-0.0965376346879219	-0.128990353555108	-0.178983562013469	0.0713864046556619	-0.0347006634105437
Mob3c	M3	turquoise	-0.0580728212666272	-0.0427154040376572	-0.172850956763912	0.111269449136861	0.106944377447239	0.214131499214238	0.150917795167343
Il6ra	M1	blue	-0.507629874645871	-0.314221444308731	0.220297537388872	0.436749304830437	0.401666479603067	0.0120205441859384	0.325916915006464
Cebpb	M1	blue	-0.605852069415425	-0.317631178161617	0.29247173594503	0.476848504040455	0.439107359170268	0.102246517102219	0.441112104432663
Pacsin3	M1	blue	-0.00119025396453285	0.028165755397984	0.140915286921402	-0.0846024189817221	-0.0562416771513493	-0.0909929834881119	-0.0335334034065441
Ankrd24	M1	blue	-0.0238865013547922	-0.00472838716500554	-0.0246061972922248	-0.0126138788877979	0.0158427623027391	-0.0398418919012791	-0.0492779440813389
Me3	M3	turquoise	0.110042760926115	0.0507215397266441	-0.134196972531879	-0.0764037311913865	-0.0408195715697187	0.0593555294369106	-0.0495184841949786
Bicral	M3	turquoise	-0.0787687725001108	-0.0565260910184303	-0.040259958428099	0.096925423211078	0.0824207083909947	0.0938573524269039	0.104396872847556
Irf8	M1	blue	-0.179989364693009	-0.0789716088623259	0.152231815859604	0.136692203502815	0.124330728086033	-0.0104100330882616	0.146651019532929
Slit3	M1	blue	-0.34759729681562	-0.158401270612132	0.067902227272193	0.264209024475067	0.277077438036643	-0.0314259504040561	0.0965107524149992
Trp53i11	M1	blue	0.156518868884104	0.127510673434501	0.0904472980746127	-0.230919850661312	-0.183967321769392	-0.0336120286141524	-0.0760133959667319
Nsg1	M3	turquoise	0.0263500063591205	-0.141506314777318	-0.226569316037088	-0.0490696977552336	0.0769528163248063	0.0529923933586535	-0.0718767929822489
Axin2	grey	grey	-0.208649084869875	-0.11199265756132	0.0173473641585631	0.202671812693957	0.18022445139127	0.0310188423527776	0.137054968800363
Siah2	M5	green	-0.053231521399821	-0.0781583762761476	-0.0767483721974839	0.0795877253370676	0.0576956937338992	0.221168487532178	0.166247884652375
Lmo4	M1	blue	-0.42452485326305	-0.231158946610956	0.138516834740257	0.386855050823736	0.326877441644034	0.0636811302019044	0.301186971690526
Cenpt	M3	turquoise	0.237848503648408	0.205695953729458	-0.125050739281015	-0.166141250706843	-0.269559465195646	0.0362387260768862	-0.082873260540256
Zfp318	M6	red	-0.0564719926419916	-0.0515109106994918	-0.0564327393127053	0.0298384072016768	0.0769796489137944	0.0930608242706686	0.0830236452472069
Slc45a4	M2	yellow	0.0535775026137302	0.0547561370850648	0.043520843231808	-0.0661741850953428	-0.100968490925886	-0.0533886462120289	-0.0484925443190533
Hacd4	M1	blue	0.154595313728588	0.050933956263499	-0.0951456180456276	-0.0933583431947636	-0.208414028921042	0.0956853072414266	0.00247374814694193
A630072M18Rik	M3	turquoise	-0.0698157634174552	-0.0359171453903578	-0.0640391905144244	0.0746940821426014	0.10877895635863	0.0343423750117545	0.0512955800494556
Ghdc	grey	grey	-0.0233111810511895	-0.0525581816255235	-0.0105892592678136	0.0351852683576022	0.0041721362673134	0.0311025579543525	0.0513613712490936
Tshz3	M1	blue	-0.0356552612331776	-0.0259787672200119	0.0844198643347042	0.000171937304810144	-0.0210858214723524	-0.0522157941544266	0.0111221843787112
Ankrd44	M1	blue	-0.399236650519911	-0.214232904840939	0.0539228972638597	0.345469410078159	0.378770380846002	-0.0108796676452138	0.189373341754957
Hoxa2	grey	grey	-0.0530199939254272	-0.00933885480770759	-0.0580474832984911	0.0568286332635095	0.0491687433481854	0.0887469330437636	0.078575136370458
Thrb	M1	blue	-0.190781103182079	-0.127250678712407	0.0947494844247563	0.172071479565864	0.172876399579334	0.0327644343593871	0.117449046265861
Zbtb6	grey	grey	-0.057115377580667	-0.0537418085471414	-0.00635935150036247	0.0600221560099175	0.0247246769264311	0.0148361837886573	0.0253514979764156
Syt15	M3	turquoise	0.0484156078079168	0.0547349871914647	-0.0722312590573546	-0.00716709658073444	-0.0310415922611239	0.0587735385381215	0.00954132086387475
D330041H03Rik	M1	blue	-0.127406178651145	-0.0884960632502347	0.0257862157557294	0.103318794500934	0.0932759075796064	-0.0415627658534847	0.0532637855593419
Lnpk	M1	blue	-0.343109226798854	-0.208615701556153	0.105973851130559	0.280494815162645	0.294669680239835	-0.0616132526368178	0.15343372079181
Stau2	grey	grey	0.0482042243223596	0.0200403712121887	-0.0572350831042981	-0.036851719214083	-0.0337699486823297	0.00277261669251421	-0.0376880132548842
Serpinc1	grey	grey	-0.00736822410548852	-0.0319691701272829	-0.031127779804688	0.022231720302131	-0.00155119025956825	0.0155367550292353	0.0430221749252019
Fam124a	M1	blue	0.0622359447306982	0.045729213505474	0.000561315274212136	-0.0661010173893353	-0.0678194931328129	-0.0375284503170592	-0.0478756332918297
Clec14a	M3	turquoise	0.0714657322480759	-0.0540958287757362	-0.527902202841155	0.0702627819362544	9.60924157561633e-06	0.214666156245978	-0.0464843137291869
Hs6st1	M1	blue	-0.0677483312491621	-0.0457353936345067	0.0135964480452539	0.0480081681095515	0.0285417300849664	0.055753440344121	0.0709612782148617
Sh3kbp1	M1	blue	-0.113830453087024	-0.124220675619262	-0.0245935810227664	0.109897768684433	0.0976393798791053	0.0116406375356542	0.054098898638702
Cox10	grey	grey	-0.060560564205978	-0.0929333130755498	-0.0373315062788226	0.0718532565488801	0.0720618329519702	0.00512527184980844	0.027718024668751
Unc45b	M3	turquoise	0.0629197619390874	-0.105061412831796	-0.212365779733017	-0.0230696913964762	-0.0143216782359948	0.0646359749479037	-0.0139910105333826
Iqsec1	M6	red	-0.371134826322906	-0.261795739148988	0.0685179002460489	0.300238984757235	0.339243106612955	0.0421053171836763	0.240288522010752
Fndc3a	grey	grey	-0.0675657595043603	-0.0550438724695921	-0.10378840495497	0.10822490227705	0.0811546624023907	0.0903066697626012	0.0793663386822218
Ppfibp1	M1	blue	0.0751953803450772	0.0522122955954886	0.176681969271311	-0.241105177067285	-0.126033459821691	-0.118319268212794	-0.0832240785361194
Ncoa7	M3	turquoise	0.00680733362163219	0.0135251574836892	-0.120045290449342	0.032306939066057	0.00733570634688603	0.00692514639139914	0.00191091152621792
Rest	M3	turquoise	-0.0168895721769492	-0.014281349790645	-0.129102346559624	0.0670083831973433	0.0544056248251825	0.150574235588433	0.118396559841028
D16Ertd472e	M3	turquoise	0.0254991391853183	-0.0461737183245563	-0.185954423962282	0.0398139318685942	0.00671580726237382	0.112067123216926	0.0559444804939557
Dach1	grey	grey	-0.213957592510063	-0.201948752637816	-0.125489653309527	0.193229689496499	0.306106404094924	0.0227275378009197	0.0557577763270858
Ahnak	M2	yellow	-0.0320494258758227	-0.279213577021415	-0.1148679551701	-0.00380603764709954	0.00725402890098653	0.102260871654145	0.0661165824905517
Gbp8	M3	turquoise	0.0208571102597075	-0.0577613371415984	-0.167759276836992	-0.00557804473897059	0.0306276779996272	0.0109537505199302	-0.0200232611440094
Yipf2	grey	grey	-0.0747440053222318	-0.103863790921498	-0.0387607774096098	0.0737258626960048	0.107397212107982	-0.000891707620550688	0.00213772567240321
Il33	M1	blue	0.199086165180837	0.177507747098857	-0.0787734305813176	-0.166829111701797	-0.17994711660709	0.0374876704519563	-0.0628245053414595
Dtx3l	M3	turquoise	0.0557378693431511	0.00642218682379411	-0.144918728705102	0.00660315977842062	-0.0218558670735491	0.0537516501574425	-0.0296291133025876
Vamp8	M2	yellow	-0.132204028473172	-0.381206300448632	-0.141934018875873	0.103487893328813	0.153864241321523	-0.00606718153529772	-0.0267343456610702
Asap2	M3	turquoise	0.168408294228436	-0.00600713504035323	-0.368996686144481	-0.0592538492113799	-0.0957030120774384	0.25203107473859	0.0417281627292769
Gm15050	grey	grey	-0.0941024394264584	-0.038744869109701	-0.0278804560431613	0.127029001075234	0.104524483795393	0.119211581295201	0.151302799497703
Ccdc138	M6	red	-0.0387158044213633	-0.0242361084855216	0.00199156040091144	0.0465141598935298	0.0247616765770402	0.0577116628606599	0.110285722678959
Vldlr	M4	brown	-0.358598294690575	-0.225786480587616	0.0892396608164568	0.323850487852872	0.317124275568493	0.0159548784514454	0.202457211282847
9930111J21Rik2	M3	turquoise	0.0776420697028183	-0.0256037760251436	-0.23666017521264	-0.0464545622926421	-0.00160048523938492	0.118428522488961	-0.0148877934579512
Sowahc	M4	brown	-0.100279546128352	-0.0530008739150202	0.00213806757767298	0.170450945791909	0.0885560246596001	0.15246241952724	0.233524882545813
Nhlrc2	grey	grey	-0.161299419503653	-0.185519414898881	-0.126310103725773	0.130478859688956	0.25725395872469	-0.0449010308494961	-0.00146265090377934
Ly6e	M3	turquoise	0.219113269217407	-0.0445456410245866	-0.589303700100096	-0.0894328557883064	-0.0557633642406115	0.253810611656276	-0.0571365854353317
Mapt	grey	grey	-0.420005126824157	-0.369793785210858	-0.0476690763968212	0.365813542006256	0.495317010300615	-0.0134196749105884	0.156601838293709
Etv6	M3	turquoise	0.0761640012023104	0.0372037880974701	-0.183124292310295	-0.0252628285798919	-0.028572633388123	0.196035457254491	0.117223958457256
Grb10	M1	blue	-0.195384985967997	-0.12027758332331	-0.00938087117678986	0.163106167934244	0.167231908221983	0.019159016112604	0.105987668577378
Nipal3	grey	grey	-0.077825641773248	-0.212218950427254	-0.114319966756029	0.0525875221065399	0.139992932534062	-0.0212916044261801	-0.047296327439298
Jmjd1c	grey	grey	-0.081122348140536	-0.0924617778777972	-0.0147715487917647	0.0981342386809222	0.0808379980843824	0.177658829393432	0.212560097181295
Pcca	grey	grey	-0.0136424048598503	-0.0280952038474494	-0.0448803410106444	0.0136692441319163	0.0439419497697801	0.0116898560054141	0.00407796043645617
Oasl2	grey	grey	0.0205800782678455	0.0207186664876456	-0.0753689889693876	0.0138707826633283	-0.00944322247048095	0.0395206717331254	0.00324212135772014
Colec12	M1	blue	-0.618357478260245	-0.381341968595735	0.137964279737712	0.518601364128474	0.475629122685506	0.0178024995623476	0.3131084612407
Upp1	M3	turquoise	0.104844283166061	-0.0159343264713202	-0.324085451516949	-0.0196466210052694	0.0253285671033882	0.217779074330318	0.0524135758310949
Snai2	M1	blue	-0.265831484393757	-0.198462781889913	0.0440949998706454	0.225622374233846	0.281223980404993	-0.0096515500223258	0.0930159899848169
Cdk5rap2	M1	blue	-0.032327117060687	-0.0516231560472601	-0.03129632039295	0.0112206401607681	0.0531354371276982	0.0163821089565581	0.0359823423149048
Zkscan6	M1	blue	-0.0764552794231579	-0.101869762221887	0.00448442886573551	0.0994287603050185	0.0612951899332715	0.0429015090432442	0.0700624946400171
Morc4	M6	red	0.0170997894175678	-0.00367776340181349	0.0352302420658059	-0.0403891318019079	-0.00833174793004578	0.0966293116220558	0.0971140346012822
Tpbg	grey	grey	0.127661607342282	0.0565730207788845	-0.0917194023623299	-0.0636387220994889	-0.114014396930534	0.0284491048843038	-0.0404054214992948
Mipol1	grey	grey	0.0475669458348138	0.0676073200527705	-0.0819059377052113	-0.00605203839790922	-0.0149200561686649	0.0177357378515713	-0.0311919893034897
Sftpd	grey	grey	-0.000387278652317876	-0.00153446315030933	-0.0582310877548729	0.0326221474406692	0.0256286703759395	0.0702703093962661	0.0437037143517349
Kifc2	M3	turquoise	-0.113046741366756	-0.0792540998375825	0.000128262971765817	0.108098254730233	0.105229688630277	0.0441665180940265	0.0705969234417283
Klhl6	grey	grey	0.0764299091972085	0.0572593796321683	-0.0345362895941363	-0.0220526694303731	-0.103385897440289	0.0388070736795184	0.0193910406988875
Msh6	M3	turquoise	0.0215139522016132	0.00460015274527874	-0.0674844415779187	-0.00806130946114498	-0.0127016802151885	0.0387941487149213	0.0208373538278956
Rom1	grey	grey	0.0125722665440078	-0.100018696117972	-0.0942622373199198	-0.0122081963071103	0.0274043876509338	0.0255199887586844	-0.0265075668823204
Cnn2	M2	yellow	-0.497803465248128	-0.461829103310819	0.0713116468512178	0.363843275718289	0.404272078377003	-0.0821356233896673	0.110926651695136
Parp14	grey	grey	0.000427717732088527	-0.0219385374008173	-0.125397056929626	0.019564661411505	0.0192422404812819	0.104176511491242	0.0292196509715404
Gzf1	M1	blue	-0.0881275210414711	-0.0815742287454298	-0.0113636754172711	0.0777226530178403	0.104022696856464	-0.040897540652131	0.00910390325104556
Col6a2	M1	blue	-0.491090852968384	-0.355203541460968	0.126096677344231	0.413393436105471	0.403647971516134	-0.027683966411713	0.208722558797135
Atox1	grey	grey	0.174318537145588	0.0307466374087432	-0.261061599364309	-0.112799887162686	-0.151279986708404	0.0235098331288349	-0.135820133014804
Xpr1	grey	grey	-0.106528977846173	-0.0720444177613726	-0.0347682267126083	0.142884742600563	0.117012869279167	0.113046874590407	0.154211954731161
Casc4	M1	blue	-0.435431613637073	-0.27748682812677	0.12444182837033	0.350957049719143	0.369257759768084	-0.0549708110671337	0.149339686277754
Tmem38b	M1	blue	-0.402355613656218	-0.239989512254766	0.1377181353681	0.338607270961384	0.330908187903795	-0.0405439731493807	0.212254318761361
Ddah1	M3	turquoise	0.0357228315639548	-0.131982072539832	-0.327152475720639	-0.00883345551341766	0.0840511588816622	0.0542740520801425	-0.0579752798590434
Prr5l	M1	blue	-0.0375967448795672	0.000559690624754594	0.134599432925701	-0.0397100700653624	-0.0196647823034957	-0.0295164392387229	-0.00192237993268072
Sacs	M6	red	-0.0103909630331749	-0.0297854352006971	-0.07492322811402	0.0104329021754992	0.0248725305864432	0.106282856520632	0.082955541274961
Mthfsd	M1	blue	-0.0695422065928673	-0.0608678701538523	0.0116220731455939	0.0266199933386626	0.041959365186721	-0.0501817655613993	-0.00650038768779598
Mafk	M6	red	-0.0767440497914442	-0.0836739506530813	-0.10249735780331	0.175216771591679	0.0927719136516446	0.313399216828119	0.28803291166155
Efnb1	M3	turquoise	-0.0776666387569439	-0.139601569184838	-0.420142752402032	0.13761701301253	0.235412623233804	0.168670240230309	0.0448042864012753
Dgkh	M3	turquoise	-0.0705529669878011	-0.135882377569208	-0.260002974854489	0.0811077961608362	0.188731124347218	0.0952136082085251	0.0263559863903436
Stard9	grey	grey	-0.249313334705142	-0.252147761073548	-0.0856057671017481	0.21936403554901	0.318519149643016	-0.00652203958333265	0.0926532801295781
Bbx	grey	grey	-0.0895473985349346	-0.101337881215706	-0.0565874587476497	0.070083854395765	0.100186901873037	0.0630234529930172	0.0638506461118976
Lama4	M1	blue	-0.155474302041526	-0.0748514606536317	0.183038292745275	-0.0264668398815157	0.0949014026547848	-0.137913658881019	-0.00254397208128073
Rac2	M2	yellow	0.0238793104372399	-0.0442331933011048	-0.0221615785510369	-0.00631199022673557	-0.0288763955120999	0.0212843590127361	0.0229735189970878
Helb	grey	grey	-0.033223122388882	0.00560211712502342	-0.0483748701361567	0.0523902661970622	0.0571365801747042	0.011590509389389	0.0213227291562092
Gm30382	M3	turquoise	0.0895072722647991	0.0664004822145241	-0.223621030137847	0.00410908750023846	0.0342592688409974	0.09275530017054	0.00144373815813862
Pms1	grey	grey	-0.0949003643831553	-0.0145795040359956	0.00849748533467886	0.10591076540094	0.101684597287144	0.0379100516713408	0.099591467996331
Irs1	M4	brown	-0.104309012855632	-0.055401061722924	0.0316574822357739	0.099002593566697	0.0995787605393805	0.00617039121463833	0.0625023178706484
2900009J06Rik	M4	brown	0.022623545853149	0.0342523867759323	0.0735576555111138	0.000499814200677054	-0.0163383406190896	0.00978350276756451	0.0152184329408453
Cxcr4	grey	grey	-0.00645829096237678	-0.00554868125266745	-0.0688795854527935	0.0192107354478939	0.0151064105213109	0.0227596304619897	0.0408330681006168
Chil1	M4	brown	-0.0413918304575455	-0.00229542039178578	0.0586091288592719	0.0458667112313745	0.0179485966922315	-0.011337190151232	0.0270997862863559
Wfdc12	M1	blue	-0.108786788877072	-0.0794281152479931	0.0774981954506447	0.103272669080548	0.100289227177746	-0.0392888890750302	0.0171401423682422
Eya2	M2	yellow	-0.0891597375189124	-0.115244390870628	0.0499613995701804	0.0621149686598402	0.0661202203175472	-0.039623580328297	-0.00131279535131134
Edn3	M1	blue	-0.0904485827350378	-0.117631072747599	0.0237121411638761	0.0623378495101702	0.0550838259866546	-0.0163801556636087	0.0129620351926328
Gm38246	M3	turquoise	0.0671604722555484	0.0670096495119533	-0.0645924590159039	-0.0229262793269144	-0.0414483481881733	0.0800771982048053	0.0452061329137465
Gm37170	M3	turquoise	-0.0268075627605895	-0.0307125435547229	-0.0505487560331909	0.0480745229947853	0.0735189451209903	0.0281465119228998	0.00814718557723999
Bche	M1	blue	-0.121135743541566	-0.0691019965044051	0.0525591903882771	0.0817178604911434	0.0937549947324873	-0.0366517997660374	0.0636493243875714
6430573P05Rik	M1	blue	-0.0556496110633606	-0.0623288269250373	0.0206493137505285	0.0753468226966475	0.0448477804177562	0.0284490799315845	0.063258734115607
Map9	M4	brown	-0.102495133972847	-0.0662676015411305	0.0417065410556685	0.0822262012068219	0.101291033015145	-0.0393415728856518	0.0441173258362121
AI849053	M4	brown	-0.0889861589021164	0.0274810879606037	0.0641535392171796	0.122104069848444	0.0776184651821956	0.0445158488246664	0.107482061429407
S100a8	M1	blue	0.0200020907494692	-0.00667031436440133	-0.0262107245487469	-0.0164210026422836	-0.0193156684276937	0.0200499146734229	0.0365787041383737
Trim45	grey	grey	-0.0213974406831554	-0.0117880260457042	-0.0329102451294548	0.0267597368628892	0.00310704180624743	0.0195880628232821	0.0107501786779053
Gm17494	M3	turquoise	-0.0424416035383259	-0.0444488402039905	-0.0249843323278825	0.0541975385903451	0.0320914020251642	0.00632531366070669	0.0299739438785891
Oscp1	M1	blue	-0.0351863420208203	0.0351123641266217	0.0231428544182092	0.00224767248955098	-0.0204555201204942	-0.0163818191383281	0.0173429871279744
Asap3	grey	grey	0.0320819261168292	0.0613798339570699	-0.0551210353372604	-0.0359103778468273	-0.0163154497952576	-0.0603725515070584	-0.0607303281174814
Ccdc96	grey	grey	-0.046754871817386	-0.039128781132767	-0.0276200578420852	0.0513431785410161	0.0518989431321674	0.0488193266588191	0.0414166910396723
Gabra4	grey	grey	-0.086092205461208	-0.0136362753394868	0.0126441985207069	0.0781212910622414	0.102430664018635	0.0464314180988782	0.051403601823194
Hoxa6	M4	brown	-0.0661847663080002	-0.0151679388308987	0.0733689107051207	0.0933947066298353	0.0374446128609826	0.0130336060041046	0.0702460069314478
Jazf1	M1	blue	-0.0403811996304168	-0.0423399971317204	0.00995087302178694	0.0316245533523631	0.0244266995795607	-0.0363448565987551	-0.0141665809921333
Srgap3	grey	grey	0.0777913344579938	0.0943332046388983	0.0814001011172097	-0.108242285564449	-0.0532891720213191	-0.0223330497809465	-0.0205756786334044
Zfp607a	M1	blue	0.0114424712084186	0.0389455366161947	-0.00805516986674334	-0.002355262578626	-0.00561328420821067	0.0365404543418228	0.0353501791302105
Crlf1	M2	yellow	-0.0882030388932001	-0.091347377725891	0.0461528412035795	0.0668663451127961	0.076872211170511	-0.0423951243748741	0.0279871095527631
Zfp709	M1	blue	-0.0764399527072907	-0.0472827705982658	0.0390211925358771	0.0328001529458053	0.0387422126249549	-0.0506867183229671	0.0211430970096344
Bbs2	M4	brown	-0.0028665937446556	-0.00148060747441423	0.00484683525860135	0.00706726268646355	-0.012209866021723	-0.0248281744539665	-0.00324813077420468
Car7	grey	grey	-0.0241480069196584	0.00253339400888016	-0.0295725173771762	0.0299992687029298	0.0382697585068132	0.0649268463417365	0.034250534384007
Ces2e	grey	grey	0.0381036728942189	0.00588041981992649	-0.0888308463032723	-0.015667668941189	0.00138632170686394	0.017611965793999	-0.0280899714401945
Map10	grey	grey	-0.039960421821778	-0.0601051147302827	-0.0487772586896623	0.0756734224571429	0.06027738984283	0.0424428509104272	0.0570285124137597
Pgr	M3	turquoise	-0.00320529100672292	-0.0146897347079051	-0.104168771215797	0.0252943100128463	0.0665724752594587	0.0514766866503877	0.0260387056370893
Fez1	M1	blue	0.0308420268013907	0.00770666337419797	0.0111443325513431	-0.0322702745103425	-0.0916330341536719	-0.023285730991859	-0.0466290044466167
Senp8	M1	blue	-0.102041762270075	-0.0880728751662537	0.0678883891294933	0.0597220693418327	0.0705621177301287	-0.0499244602862859	0.0231952760879835
1700065D16Rik	M3	turquoise	-0.0339258964467597	0.0324964142077428	0.029752131485834	0.0684109674968135	0.0314178097272548	0.0432052030364801	0.0733281317991278
Clstn2	M3	turquoise	-0.0134015555156444	-0.0512719892153667	-0.0470802267667034	-0.0320092974334717	0.0275491666756373	0.0253012789329857	0.00493109537063327
Zkscan7	M1	blue	-0.0202865318849646	-0.00955162782870588	-0.00392695451506989	0.0328538934794129	0.0178581734412973	0.0289222491659932	0.0446098832357018
Gm39822	M3	turquoise	0.0644880502517052	0.0735196370946864	-0.0540453554523838	-0.037930421839318	-0.0840504510019553	0.115183033743611	0.0661882927834999
Gm11423	M3	turquoise	-0.047716219948709	-0.0436695422704529	-0.0282300025247106	0.0431837983215523	0.0434137746194646	-0.0244315342267619	-0.00732861603406753
Colec11	M4	brown	0.0594451589711575	0.0731988831595502	0.00679168750767573	-0.027347012880575	-0.0865783463332441	0.0421492204569538	-0.00656852477400563
Tmem229b	M3	turquoise	0.0191880797922289	0.0166668329509332	-0.0719128350288596	-0.0170877314503115	0.0182228122371553	0.00243853583006164	-0.0287069599975732
Gm20337	grey	grey	-0.0523913167089498	-0.0284702083026986	0.0151821385028006	0.0699243425117562	0.059803597716587	0.0302473956040375	0.0518375486087518
Rgs6	grey	grey	-0.0185254951988793	-0.0425703831536808	-0.00231122958561943	0.00833154814904439	0.0252219807064415	-0.0172968717589768	0.00311124148113057
Ttc8	M3	turquoise	0.0151046136196704	0.0340546754504261	0.0263847089913081	-0.046199559681795	-0.0434476185568362	-0.0285066919552757	-0.0323526770872978
Fst	grey	grey	0.0119536335647654	-0.0298190246069211	-0.0565627577663709	-0.00351284681080411	0.0271144140350042	-0.00423103025815874	0.00245494105889481
Nefm	grey	grey	-0.0490186398198142	-0.0559511843365523	-0.0275326068805554	0.0512380930525464	0.0706877054916003	0.0146787190255595	0.0507499955335919
Spag1	M1	blue	-0.0355184260706822	-0.028209409636236	-0.0204632026233824	0.028879783874846	0.0516184682229912	-0.0699219768353748	-0.0610205059719756
Slc39a4	M3	turquoise	0.0539581164580754	0.0348802840590528	0.0330542545796945	-0.104760074839796	-0.0861757803530038	-0.0647682126495846	-0.0956694029562783
Pdxp	M5	green	-0.0507602050100721	-0.0271535464373167	0.00145614687833078	0.0774351942095351	0.0510884572184756	0.0632897146910057	0.101928791914311
Tcte2	M4	brown	0.0209701526830489	0.0606339976389488	-0.00238572383181795	0.00885522427711904	-0.0369340811046792	0.0753246105895072	0.0557141108328561
Gm50107	M1	blue	-0.0315373860170604	0.0100141216156305	0.0151788638827756	0.0022826784177752	0.0201619981853842	-0.020724786215554	0.00234660053103887
Vars2	M4	brown	-0.104390788404782	-0.070092740349337	0.0342913385008145	0.0991293119519563	0.0884104555237839	-0.00462645420905886	0.0502517011969674
1110020A21Rik	M3	turquoise	-0.0364224493577619	-0.0510319102967528	-0.061546572736418	0.0336859895248007	0.0361304910300429	-0.00746753433169754	-0.0313780789806375
Pcdhb18	grey	grey	-0.0538976657653957	-0.0736764967384707	0.0206050587051682	0.0221210285500118	0.0334009387508673	0.0384281726969045	0.0609739234253134
Xpnpep2	grey	grey	-0.0880459634630039	-0.110559612912552	0.0077816091524986	0.0410289536803838	0.110167629227059	-0.0643073934403442	-0.0276739577078171
Arhgap4	M1	blue	-0.0637419777115807	-0.0604197472494129	0.0177572601917549	0.0532034440784609	0.0425350114827922	-0.00563489594797156	0.0448532010385542
Zc4h2	M1	blue	0.0238176728360375	0.0286560440774827	-0.0492696613489595	0.00416834686887982	-0.0359586470226592	0.0141513925498894	-0.00439531069362165
Lpar4	grey	grey	-0.00985659854465362	-0.0349825917816052	-0.00293926203700869	0.033062460566217	0.00398239447240241	0.00280492422900777	0.0287174032762744
Gpr173	grey	grey	-0.101090265106292	-0.0368022107344796	0.00432979034289802	0.0695890524018752	0.0963695443214587	-0.0188824172776737	0.0103948190407747
Tuba4a	grey	grey	0.0170716609681868	-0.0520609435546675	-0.0584264754818134	0.0262393017738394	-0.0182955398938942	0.0913687539995832	0.0354457695076094
Mphosph9	M2	yellow	0.020408276241159	-0.0729295391131924	-0.0268028332085077	-0.048843296119309	-0.0245890603724161	-0.00950617248328791	-0.0111177880414001
Ccno	M1	blue	-0.0518018224901589	-0.038755368662269	0.00755935881309254	0.0300019150604178	0.0211826001773574	0.0689831844776516	0.0769159108904673
Gm28791	M4	brown	0.012733845371662	0.0149932940166815	0.0269032347263324	-0.00727963807673086	-0.021248748982258	0.0325558612961479	0.0551667402666787
Trmt10b	M1	blue	-0.042322493613045	-0.0198078522985951	0.0335608280007925	0.0302819772385267	0.0234831296257347	-0.00736531309949448	0.0529687306479556
Cdc14b	grey	grey	-0.0887048893020287	-0.0477956377379588	0.0399946442170999	0.0556263809569202	0.0938102861347693	0.00657813428519243	0.0563689533663181
Znrd1as	M1	blue	-0.0150774181888513	-0.0891832799873962	-0.0410721372443593	0.0182558107024565	0.0116215050890909	0.0362355270651764	0.0132351490256821
Rp2	M1	blue	0.0275645996725467	-0.0638818547578503	-0.0202108768856538	-0.0461040523942399	-0.0454452415155641	-0.0765398729531254	-0.0907159356099563
Sema5a	grey	grey	-0.286145741157236	-0.176947608158509	0.0582637120486431	0.25763891485959	0.261849916998985	0.051678646881695	0.172123529555743
Tmem120a	M3	turquoise	0.062576742291334	0.0559529047465193	-0.114236336275075	-0.00691314539154308	-0.0798011456107347	0.103110564244691	0.0333949766266005
4930503L19Rik	M3	turquoise	0.131627442601515	0.0631884079781454	-0.120688586222447	-0.113532017059941	-0.087436516766855	0.113289940447125	0.00032918178856163
Ufl1	M1	blue	-0.110766199187428	-0.116150189447254	0.00830988879819691	0.0846747334717795	0.118939384624381	0.00384184574926074	0.0605112064580531
Aplnr	M3	turquoise	-0.0878471673263723	-0.134700563238337	-0.222814115862296	0.111826732945521	0.183103031450196	0.125654798591168	0.0258176033537913
Pla2r1	M1	blue	-0.357191423404447	-0.231897496934053	0.10686220044921	0.299025769146767	0.29323827006528	-0.00882420966631116	0.179258033184342
Dusp5	M5	green	0.0483537631901661	0.0387997149806174	-0.0853349956784922	0.0136675271262261	-0.0203792484669359	0.161797821317803	0.0896266739991907
Fam20a	grey	grey	-0.087396223918317	-0.0606558765783799	-0.00528413249139159	0.10200181939423	0.0856072605036967	0.0640445566451294	0.0865571070384228
Maml2	grey	grey	-0.121800443341618	-0.120710558292887	-0.105831448433732	0.119594609845017	0.148818672433073	0.0571280208459105	0.0856631099404825
Enpep	M1	blue	-0.40673048346399	-0.283257687715764	0.0825675503620377	0.314758234714731	0.351154795038042	-0.0383536489834465	0.153381611373721
Gm17251	M4	brown	-0.136642873696178	-0.0714440985723725	-0.00256403716340704	0.201748543982534	0.135454585673935	0.170388026652922	0.197662973755124
Rnf150	M1	blue	-0.254425671517211	-0.180566233574691	0.11747325882671	0.221448231373662	0.1984535402773	0.00278655989537736	0.139343162533202
Tek	M3	turquoise	0.2067287441993	-0.0242660981078974	-0.52585710291564	-0.0599594959299928	-0.0630439162478	0.223368350667742	-0.056618631396607
Zc3hav1	grey	grey	-0.0386695838247368	-0.10349885819142	-0.191502506547905	0.0825465602405088	0.105866570509332	0.185120790208673	0.0984481209237772
Tes	M2	yellow	0.190244465818987	0.147303082420931	-0.0923206642008591	-0.163418665235589	-0.177802645186419	0.071038358895039	-0.040331442898692
Agpat2	M1	blue	-0.0878614184344887	-0.0673823800273673	0.0383714146409596	0.038189750550376	0.0435231969564324	0.0111929762278465	0.0337136170443046
Igsf10	M1	blue	-0.284236211085276	-0.108328601303083	0.116153505961053	0.205660244869371	0.24279878067678	-0.023204998858844	0.163513685331878
Papss2	grey	grey	-0.284846327588713	-0.153408511149246	0.0823360887642287	0.274585697738567	0.258656390917991	0.0901849521305182	0.225207252827268
Ipmk	M6	red	-0.163064855852749	-0.167377463392878	-0.0609758513787797	0.174428200836067	0.197251068568719	0.108311352081971	0.180448284166801
Prnp	M1	blue	-0.121283176947816	-0.0526049891549568	0.0870664236855698	0.117153018534375	0.0341917873522506	0.0126475220664457	0.0913108358340461
Camkk2	grey	grey	-0.102613992700766	-0.0725606754894605	-0.0190932507219717	0.0947892691439677	0.0823481581195087	0.0507558538337032	0.0952300374535332
Chst3	M1	blue	-0.355831530894937	-0.175706969447736	0.164095912063002	0.29873247869147	0.248617282792165	-0.0174497030719358	0.21266773557851
Zfp354c	M1	blue	-0.103183827999544	-0.0676947203062099	0.0920960991555853	0.0838858356748103	0.0776730123097257	-0.0905411258712383	0.0146518974108287
Serpini1	grey	grey	0.0142570165188575	0.0285692817503008	-0.0195645859027666	0.0178948679399849	-0.0810046675008951	0.063641131628425	0.05185039328779
Map2	M2	yellow	-0.0760710945784582	-0.154488401548862	-0.0261767419293266	0.047846385660525	0.0885481925939014	0.0317077030898847	0.0104945959784699
Rgs18	M2	yellow	-0.0527319657183795	-0.141473693699346	-0.0123187210766215	0.0419607472979475	0.031137968079939	-0.0213529079902086	0.00288705222587003
Gm43696	M1	blue	-0.0490939924127113	0.0201861382064932	0.0319760930655661	0.0542264887527579	0.0381073996392428	0.0514520037806902	0.0615811415126623
Gm12500	grey	grey	0.00125296616287336	0.0250486129804985	-0.045995003909454	0.0188066213383009	0.0306762061667395	0.0395066057616855	0.0365214097211251
Brat1	M5	green	-0.00574385194022134	-0.00132216592597512	-0.0652200392436456	0.0436267015657126	0.033817724101873	0.111378336770916	0.0948367017825941
D630029K05Rik	M1	blue	-0.137077107744092	-0.108395194089766	0.0795075842065202	0.106224355870449	0.118254504536302	-0.0346593197891531	0.0446789915338281
Kdm1b	M1	blue	-0.13033272063543	-0.0984444163606167	0.0411612243899507	0.106039353876907	0.120092217548434	-0.0115272127281128	0.0453560282249301
Dlg3	M4	brown	-0.0674871094463	-0.130609504595542	0.0124988526926922	0.106690565504727	0.0827691307900679	0.0178211356486087	0.0461170430812869
Adamtsl3	M5	green	0.110122113369192	0.0918692498827377	-0.0895212469103478	-0.0659396845015002	-0.07861317076052	0.0293270906274919	-0.0664993337392353
Ifrd1	M6	red	-0.383450747431205	-0.285214630676811	-0.00883106896813177	0.413832320513362	0.270668827482756	0.353682313949144	0.502859971390452
Egflam	M1	blue	-0.189614759147783	-0.109528286863648	0.0942319106222693	0.126165077806008	0.140387426314668	0.0246606497074989	0.10102145856801
Slc25a20	M1	blue	-0.0814030090765048	-0.0666120840970152	0.0307856373118182	0.105976094177082	0.0757679195553357	0.0504194701883471	0.110992161391252
2810454H06Rik	M1	blue	-0.0482767725694303	-0.0366366753672428	0.0164549173119421	0.0513459055184679	0.0490371675417924	0.0290217424163377	0.0324822399551696
Gk5	M4	brown	-0.0678562071058712	-0.0189183053919119	0.0193581463924932	0.0937866504873835	0.0514543375630518	0.0610029658462412	0.129507859390891
Ing1	M5	green	-0.15372736290229	-0.112520874202588	-0.0847744922874314	0.232998325518083	0.17740044820945	0.277795804382326	0.28794010778253
Fdx1	M1	blue	-0.473310722696675	-0.374398769777254	0.12561183170002	0.398695502428283	0.399050385383907	-0.0370511976822584	0.19841459198054
Sdc2	M1	blue	-0.478849905877015	-0.280342667940028	0.113033758872417	0.424237816460057	0.411914394723479	0.00683232867762241	0.2690669592341
Pgm2l1	M6	red	-0.063434361529299	-0.0470797053571373	-0.00771181249703304	0.0769400073855645	0.0403665132904085	0.0390843883002045	0.0890813204826304
Sfxn1	M3	turquoise	0.0610663191903318	0.0491159274061517	-0.0725704622586765	-0.0166647885771764	-0.0851561539799188	0.0458402929296017	0.019476593077194
Coro2b	M3	turquoise	-0.0924579896836324	-0.190645532160178	-0.179922150164825	0.0969380403426058	0.129587320735561	0.0889240749732853	0.0118696975517067
Scyl2	grey	grey	-0.0401967268231306	-0.0155863913917024	-0.0129043130651582	0.0323598926514016	0.0323506124682028	0.0475707125895705	0.0511966093784791
Carmn	M2	yellow	-0.259460744197637	-0.182297910123974	0.0581825344178604	0.176879341781967	0.244450937907826	-0.0571944999062277	0.098712736720803
Cavin3	M1	blue	0.220756943865104	0.158086244202295	-0.0160985829253137	-0.270352719203418	-0.270229277203067	-0.023613893476971	-0.102744066918828
Pkn3	M3	turquoise	0.242754501627516	0.179277586611358	-0.200214762236693	-0.121074706132437	-0.223411447341089	0.117585674556118	-0.019919780440433
Aggf1	grey	grey	-0.0348551334803641	-0.0374938828108585	-0.0618730532339875	0.0608030496168978	0.038382526022082	0.106897772734655	0.0803545849424781
Snhg18	M1	blue	-0.464480096819063	-0.307478506668292	0.117329113633388	0.3891991713944	0.364711565374147	-0.046347132663161	0.183150963139082
Cdc42ep2	M3	turquoise	0.014605376267879	-0.0949876751745371	-0.2419571244754	0.0350965042362169	0.0879656685524551	0.164695546362223	0.0409090081971517
Bag3	M6	red	-0.0864664001708945	-0.0585968524922525	-0.117229466370792	0.135145337236599	0.12369943502716	0.255840404783726	0.259124457540052
Slc1a3	M4	brown	-0.369940639619692	-0.163533521602684	0.125340384813332	0.36895242138696	0.27924350236294	0.0127517694046079	0.226870835916915
Ssh2	grey	grey	-0.248441437222821	-0.117502751320455	0.00637662809068732	0.213139927762662	0.248987471674075	0.0820802598933912	0.184714614198338
Lrif1	M3	turquoise	-0.0894893386463571	-0.0441191034906835	-0.109561954178231	0.0949729814270698	0.126674364896468	-0.0192722292662018	0.0169111029165117
Gimap6	M3	turquoise	0.155085670226785	0.0242145385522622	-0.163690824713543	-0.188309144160698	-0.0499716362333932	0.0816704354628171	-0.0703927495265662
Unc5c	M1	blue	-0.306697470277202	-0.204510768580579	0.0934600294506035	0.281829216070078	0.268666692012156	0.00779596211745873	0.191556496812769
Adamtsl5	M1	blue	-0.212001559235924	-0.188015147182597	0.0438062315133622	0.168675784678691	0.184653440886931	-0.0521657804630615	0.0648124437248598
Tcaf1	M6	red	6.3971977694422e-05	-0.00386300219219581	-0.0974064324147379	0.0415135460290248	0.0120400326313198	0.0589757454012747	0.0599160799791206
Bpgm	grey	grey	-0.00796687066186921	-0.0528752944428248	-0.047376608574754	0.0473330409671055	-0.000298922552253639	0.0412355841487819	0.00549768430515669
Zfp62	M1	blue	-0.0380180090068909	-0.0344346579162291	-0.0416533106038703	0.0447294633589823	0.0705060399425283	0.0928981913595063	0.0657260018813229
1500009L16Rik	M1	blue	-0.118964237394956	-0.0699237681343652	0.093312569729157	0.111700667488811	0.0949897861802429	-0.01158923286634	0.0787163166596607
Col6a5	M4	brown	-0.152069209513926	-0.121783470312492	0.0853922720903955	0.143991919878937	0.112580221415557	-0.034194829289908	0.0730151988692472
Hoxd9	grey	grey	0.154985407633866	0.164425566330637	0.154321818869831	-0.269901753166868	-0.232275858590139	-0.0883962402271434	-0.124879916318304
Zfp458	M6	red	-0.0329200963187485	-0.044758271745226	-0.0806962450960348	0.0167787960956092	0.0553145022725444	-0.0287454157062451	-0.0117289607679102
Papolg	grey	grey	-0.00734770864512709	-0.0426325778223873	-0.0485923728860796	0.014540486675009	0.0240693028051123	-0.00676968258228481	-0.0371364023505753
Traf3	grey	grey	-0.0806350747510952	-0.0984254019691997	0.00302523139242476	0.0591580608785321	0.092583284725551	-0.000632298778979426	0.0407271205066955
Gpr155	M1	blue	-0.149635705938474	-0.108405486629506	0.0522952245339259	0.131633773036953	0.152176840206355	-0.0543030213206253	0.0432089362920018
Cdh1	M2	yellow	-0.0962884639684453	-0.192519681145473	0.00531936550380384	0.0738736476197228	0.0980384259942418	-0.0287399196030078	0.018703785481327
Hist1h4h	M3	turquoise	0.0389279963597599	-0.0263617932183669	-0.103926916010443	0.01247428952102	-0.0093149586662537	0.0536722325461014	0.0171616428581933
Wasf3	M1	blue	-0.185773073521899	-0.181416906717034	0.0464947208825411	0.142964083218473	0.164111309271058	-0.0122562714348832	0.0717438109132805
Zfp638	grey	grey	-0.0952728963246282	-0.109459261223369	-0.0963752968095481	0.104070380823538	0.122519333399351	0.0556668900160859	0.0352769458007304
Plxnd1	grey	grey	0.134109695587863	0.0982264561217069	-0.127541129348347	-0.0501666730354127	-0.151742326450534	0.103878980468355	0.00733173375692703
Zfp36l2	M4	brown	-0.0353139611074407	-0.00391860988178533	-0.0329859872934775	0.0500791147452199	-0.001412391599317	0.213030750177209	0.227103576514902
Mtss2	grey	grey	-0.0582502579822145	-0.0940030865776459	0.0571886313553025	-0.0604898675530191	0.0632214278597016	-0.0602957079506364	-0.0271637153898138
Arhgap31	M3	turquoise	0.226800270531216	0.0310165575659294	-0.504999742766177	-0.110330384618425	-0.0969961350394751	0.2545295423215	-0.0326396365042138
5430416N02Rik	M5	green	0.0148182442730705	-0.0225235895631879	-0.148085464945103	0.0643878399109793	0.0295032456384107	0.233785766812119	0.146368786983996
Adamts2	M1	blue	-0.296527738445867	-0.128284780680409	0.163459053700399	0.212827696980699	0.186490146251011	-0.0840858905020838	0.0733824217602605
Hecw2	M3	turquoise	0.0187331183334192	-0.123857278778291	-0.3682801194544	0.0770846631674806	0.134903674426904	0.203073898863167	0.0518706904510289
AU040320	M2	yellow	-0.00349890608539929	-0.0687527492079247	-0.0689752351115262	-0.0013496632256299	0.0354147847742695	-0.00410496496793233	-0.0165213902844333
Otud7b	grey	grey	-0.0795823763331898	-0.19077408145375	-0.120667959885679	0.0570122770201552	0.161101712816754	-0.0180631819269428	-0.0304677030663475
Clec2d	M3	turquoise	-0.0376610526930486	-0.15611081304692	-0.305920960524507	0.0570150614858245	0.166476492166348	0.030044420642218	-0.0914479393747798
Klhl5	M3	turquoise	0.0791756716029296	-0.102530708081147	-0.518598570417917	0.0383743741854131	0.131389213339866	0.180255258016866	-0.00784631863962329
Bmp6	M3	turquoise	-0.00997076298713607	-0.115342445958085	-0.374974115390914	0.0958901339826315	0.113105430907404	0.153814804797444	0.0454267960188081
Prkx	M5	green	0.0221451097241681	0.0411832226569223	-0.158751042469443	0.0778656833394189	0.0369755251911627	0.21503559238371	0.108963011445308
Znhit2	M1	blue	-0.0198354516697955	-0.00246941736121464	-0.0325755262439044	0.0450351282464978	0.00461503289599702	-0.0248047594553774	-0.00654445363710453
Nim1k	grey	grey	-0.0309771234695227	-0.0304579768113097	-0.0222869011188072	0.0319278422712211	0.0310235977601258	0.0351999787503155	0.0765040652438306
Tbx5	M1	blue	-0.362340098601521	-0.211008950629776	0.142647691165762	0.336642917090804	0.300799913022306	0.0175854810940904	0.228718112589793
Hs2st1	M2	yellow	-0.168132490509805	-0.185216346484239	-0.000487256151292616	0.140996831520415	0.13391959875713	0.00600154149845643	0.0387784167281698
Clic5	grey	grey	-0.107761117407577	-0.458722190551795	-0.34266063363205	0.111518351783877	0.226018645894655	0.0876275535791573	-0.0162410262774378
Rnase4	M6	red	0.0670028476304627	0.132201558882355	0.182947396803007	-0.207773842741913	-0.149015087021839	-0.104745669050543	-0.102333868356608
Actn1	M1	blue	0.0924292564647627	0.0515846742426864	-0.125495437742367	-0.0242308483950008	-0.115010531308169	0.124768064848814	0.0556613911551931
Clmp	M1	blue	-0.351750371161193	-0.261329981217008	0.118505117112243	0.285901224479274	0.281174875456204	-0.0657845764373862	0.144651983631849
Csgalnact1	M3	turquoise	0.0075695006138078	-0.0819548116226072	-0.189205083069208	0.0292336654052131	0.0702830951888566	0.0910088605372863	0.016920267998794
C1qtnf7	M1	blue	-0.500655870676627	-0.273219048466013	0.151931625316543	0.409574612424051	0.403902820007259	-0.0349770798278079	0.21409972145522
Dennd2a	M4	brown	0.00894921422515959	0.0450187662476159	0.0983114749089561	-0.0732696719156566	-0.0534355097658192	-0.00569008473959472	0.0336133939345127
Col15a1	M3	turquoise	0.0780697304118646	0.018551311858575	-0.138401264083954	-0.0285228248321632	-0.0414074449411077	0.0251118225535532	-0.0595007698658873
Irgq	grey	grey	-0.093415702904584	-0.0361034638305376	0.0231645389116183	0.0863730491366358	0.090354557742197	-0.0536823290712096	0.0272628447728691
Cd81	M1	blue	-0.624272974170271	-0.340729532674611	0.18143463170892	0.553868180776161	0.3981099472315	0.00777326012904534	0.313504737882861
Acer2	M3	turquoise	0.107673166563788	-0.0681934525100024	-0.588340887914383	0.0370378491125125	0.0475113235429508	0.282817602115365	-0.0218840200538733
Hoxa5	grey	grey	-0.159176999191671	-0.0858602315555383	-0.0814600924484971	0.227181697839012	0.186130247201475	0.106655604431892	0.165483988535971
Chst1	grey	grey	-0.128835389095461	-0.0945790503214456	0.0115764614610813	0.0633607150276064	0.170145102908224	-0.136049986277167	-0.0446922358929452
Mex3b	M5	green	-0.100314814083194	-0.101571660281024	-0.0629938925705268	0.0830348027684611	0.116498639955073	0.0878928794830465	0.0945910500100328
Egfr	M4	brown	-0.235354908637466	-0.0710745768921105	0.114256463841112	0.243610225236778	0.18698207169839	0.0213706203076135	0.167252945657866
Popdc2	M1	blue	-0.175905169326822	-0.0931456019961977	0.119311239299329	0.0973199670623358	0.103295417652402	-0.0523488429946761	0.0460083055388776
Sept6	grey	grey	0.112987719284462	0.0527979749082831	0.00709161656861308	-0.1869343313411	-0.163957169864657	-0.0922462646340961	-0.136987792159962
Cers6	M1	blue	-0.405550518984643	-0.223565626983553	0.155947634989304	0.318104050399397	0.316331868885502	-0.0685819927505081	0.179738215357601
Pald1	M3	turquoise	-0.00752655584140159	-0.0152017582892325	0.0250529141425032	-0.0869860910022552	0.0257978827858715	-0.0854870602513639	-0.0806279089954287
Hdac4	M3	turquoise	-0.130090878909405	-0.10276760025344	-0.0403806132852491	0.120168018008108	0.122406912531301	0.0692058668903967	0.0947330345275039
Gxylt1	grey	grey	-0.145417617676314	-0.144453250932678	0.0178447598681218	0.0936235622019483	0.135541524629795	0.00674006110477735	0.0449378170778408
Prkd3	M3	turquoise	0.02566518714625	0.0393111781434475	-0.0829992122214224	-0.0419225810745292	-0.0303642325076586	0.0191697445915188	-0.0379831951937876
Esf1	M3	turquoise	-0.0979277803839379	-0.0951928317945998	-0.103361533736972	0.134067303289257	0.109992311240436	0.0293510827416528	0.0342354837903726
Ppp1r16b	M3	turquoise	0.0500266450922139	-0.0715112083356447	-0.229397879611578	-0.0306523180872471	0.0312899383310666	0.0921038934890092	-0.00870349872453137
Vgll4	M3	turquoise	-0.0749146547920885	-0.113032973978016	-0.187222138729974	0.124265977358199	0.180858520102143	0.189035828388584	0.144595874215895
Eml1	M3	turquoise	-0.0196978865113215	-0.0386342724516246	-0.130141510220966	0.0641687003592946	0.0526947821736795	0.0412775338613016	-0.00425891459342507
Fgf2	M1	blue	-0.265299355193745	-0.179669503608804	0.0834615104829934	0.237826708580474	0.215861054561673	-0.0434329790329716	0.129647257151776
Epha1	grey	grey	-0.310907370450474	-0.239953891644561	0.0574926852240323	0.249972388802826	0.303146786013102	-0.00807286576338218	0.118498140153858
Spen	M3	turquoise	-0.0547222499535938	-0.0791861024533127	-0.0837268362906924	0.0259424747516219	0.08863723391169	0.0864477139630958	0.0856048441295003
Galnt15	M1	blue	-0.126322915999975	-0.056344743172157	0.10962966055894	0.131251343617198	0.0253383245596675	-0.0305001002548221	0.0892174866612506
Sort1	M1	blue	-0.419689173903186	-0.290050401947153	0.0986382833832714	0.34792209413885	0.357330680091656	-0.0257718471627023	0.175390130775402
mt-Nd2	M2	yellow	-0.173845570952491	-0.295054725285223	-0.141312239853515	0.117787101982375	0.137815064605309	0.0159739626202995	0.0119112572028683
Pcyt2	M3	turquoise	-0.0642024240680407	-0.0584965788253763	-0.084441887909184	0.0890449732319766	0.0910317751137482	0.0450204314895103	0.0767005632980583
Kazn	M3	turquoise	-0.0535332753781025	-0.131291372004346	-0.169306588687648	0.0589510056186795	0.11345989856369	0.0737914882329411	0.0517311487762111
Pxdc1	M3	turquoise	-0.0214192066574787	-0.176529419426324	-0.345280910428932	0.0556195541288588	0.108125616408382	0.162665670874954	0.0259003293822131
Isyna1	grey	grey	0.0740902191053947	0.0486899276781487	-0.0692153472228726	-0.0108232015279022	-0.121667825254878	0.0788924970995021	-0.00890403216581896
Sema7a	M3	turquoise	-0.0894805026575025	-0.13477707080454	-0.21219828989787	0.10967539268638	0.193927147236194	0.102137096789881	0.0637359142495691
Cacnb2	M1	blue	-0.294553904007229	-0.172605385672192	0.122816135347721	0.211737170959703	0.235246021516988	-0.0980536698680389	0.0727610084940672
Usp6nl	grey	grey	0.0133160056354479	-0.00544762176587538	-0.0734470327321558	0.0149602310077814	0.00411353887360918	0.0811677076509458	0.0501103360907674
Plekhh2	grey	grey	-0.218437132698226	-0.155726523615874	-0.0192541473004188	0.156255024274343	0.242424502463449	0.018582923631603	0.0703863355666084
Snap47	M1	blue	-0.0837486188181155	-0.0532614028282892	0.0269944317482478	0.0690373801388625	0.0604304090564459	-0.0201402434960813	0.0344762819691786
Odr4	M1	blue	-0.0846839691706282	-0.112752742706446	-0.0748645587986434	0.0613397762604777	0.0842600106660382	-0.0168412522936139	-0.0180824130720796
Castor1	M3	turquoise	0.171915370177647	0.141299275032983	-0.100395277996898	-0.140532994560909	-0.196873125810322	0.0739142192744775	-0.065330914504233
Col4a5	M1	blue	-0.305857394322124	-0.150278560892279	0.091611814395043	0.243087943807524	0.264378285056079	0.00539363775521075	0.146992121810688
Adgrl2	M3	turquoise	0.0936495783125352	-0.0644367922158677	-0.46213427069105	0.0218693428605344	0.105076884114017	0.203361515713186	-0.00396404950037435
Ipo11	M3	turquoise	0.216138632851463	0.146947260732707	0.046704518090304	-0.270620939402244	-0.236336945809779	-0.0110987250690156	-0.114478504458845
Ptpn21	M1	blue	-0.185021044853218	-0.153700147900222	0.0198611346315766	0.162783470205264	0.155046738313926	-0.0072204831204863	0.128093672356445
D1Ertd622e	M5	green	0.0357580603684268	0.0159960452042653	-0.099652462021261	0.0373398800876186	0.0201999355632895	0.212855703239475	0.110450383155593
Iars	grey	grey	-0.0307319864925798	-0.0718910565197689	-0.0255846749651698	0.0293990957264493	0.033026260628638	0.0586295278026499	0.0901107461064696
Txndc16	grey	grey	-0.114557543858443	-0.08550723556714	-0.0342216466824757	0.0940870543643457	0.131073238111145	0.0119273459115145	0.0836291273843422
Gcc2	M3	turquoise	-0.0133479072359231	-0.149606891306605	-0.282814460128541	0.0850546910933017	0.116027648645981	0.138625171574169	0.0369819160973574
Galnt7	grey	grey	-0.0352420982499951	-0.0119196457676295	-0.0337460717678634	0.0686633896878327	0.0342340532270509	0.0126846179083418	0.0484387712913247
Zfp52	M2	yellow	0.0957639453635221	0.0502258690695228	-0.09130208716685	-0.0529986361351464	-0.075652178263043	0.084593032288974	-0.000526952678029852
Colgalt2	grey	grey	-0.0831796559402342	-0.081399214259996	-0.0542533607911896	0.0675785005942505	0.119886595219842	-0.0130492769357307	0.0110339634795377
Hsf2	M5	green	-0.0524572441210675	-0.0384923629528185	0.00286246178009656	0.0550646658358506	0.0328525021429815	0.0971880187353706	0.102687074336095
D430019H16Rik	M1	blue	-0.236425583974356	-0.142839530412999	0.110918794672459	0.179464321324686	0.17335666322865	-0.0291515823617661	0.101537782744362
Exph5	M1	blue	-0.21982019234097	-0.130458023575029	0.085219839277744	0.144775200006461	0.156001606430408	-0.041877089987048	0.0449621726251078
Nol10	grey	grey	-0.0168105068377444	-0.0296281718297883	-0.0619963951432834	0.00675635981895642	0.0502120773107535	0.0749904758890861	0.0412472234166117
Utp20	M3	turquoise	0.00127406628814521	-0.00125746502166916	-0.088300123720789	0.0298764189333891	0.0130087398736794	0.075317700641574	0.0292897254795269
Ptgfr	M1	blue	-0.204998960843191	-0.22163211733672	0.0177440292653439	0.170319108143401	0.198471366961767	0.0316427535902791	0.103298220865731
Zfc3h1	M1	blue	-0.0700087378381469	-0.0459534471642976	-0.0269566558918467	0.0404012306056242	0.0778093787000081	0.0100232496256234	0.0343786577023624
Tspyl2	M1	blue	-0.199327242755285	-0.133381929479466	0.0566069791928106	0.177777865851329	0.170153353508954	0.0121045221005845	0.146049063326147
Bcam	M3	turquoise	0.211947772945005	0.0595387498616556	-0.377592777060194	-0.0607200084848667	-0.113735959927528	0.181215640473787	-0.0295638906685674
Scrt1	M4	brown	-0.0551958381509471	-0.0388782235795325	0.0319383181539969	0.065492257936653	0.0161798651509681	0.0176683735608442	0.0531994163660523
Lpar1	M4	brown	-0.358693736174399	-0.208445547092212	0.120852825295701	0.395345681326925	0.334077670640333	0.0722437214538033	0.282535446063598
Tor3a	M3	turquoise	-0.0602865328528723	-0.147337679572116	-0.199429193676823	0.0763303333492756	0.109878096007923	0.0280489000463992	-0.0131738450611211
Ackr2	M3	turquoise	-0.0122972357448619	-0.0411801845271852	-0.127461619144566	0.0188709656210566	0.0659382819036576	-0.00486970769582745	-0.0548972146471091
Lyn	grey	grey	0.0416235284304079	-0.0265843939467651	-0.0199501450035611	-0.133502077556916	-0.0308765544516094	-0.0563163174563296	-0.0597872125874478
Mettl24	grey	grey	-0.31463208255543	-0.167742906874153	0.0472047998157217	0.296639621378261	0.32864988941242	0.0174859804329732	0.158876477450891
Boc	M2	yellow	-0.312778928986212	-0.228129376157196	0.0811754410102666	0.246324723327458	0.234243355498794	-0.0884804922573637	0.073589743927812
Borcs6	M3	turquoise	-0.0840931393292386	-0.0731728554727644	-0.101704267663247	0.0975779551919564	0.123795957431342	0.120518117332446	0.0682368187525136
Cacna1a	grey	grey	-0.0283277646875216	-0.00505675895816722	0.0443608363417329	-0.0238616038774265	0.00811934994105452	-0.0361000623159996	-0.019204296692328
Ltbp2	M2	yellow	-0.106922685721043	-0.133162003552063	0.0451325559075446	0.0438156477683845	0.0916003200959002	-0.050882269536476	0.0235077221647996
Prune2	M2	yellow	0.116323366420176	0.101107307928039	0.0543843208852635	-0.177041722087597	-0.16460800491585	-0.0546259542246933	-0.072495251888212
Bdnf	M2	yellow	0.0152490500115049	-0.0568826915836148	-0.0530340790293772	-0.00331776622426493	0.00661710728390551	0.0361468447811281	0.000141982706926091
Zfp2	grey	grey	-0.00559493295891453	0.0133066767307139	-0.011981625643296	0.00335986612222412	0.00164607020576318	-0.00144384484812503	-0.000854586824868789
Glb1l	M1	blue	-0.0738901889521388	-0.0480175919526834	0.0742169363241347	0.0630798765673913	0.0278618809051757	-0.0301720437991118	0.0474128640128572
Slx4ip	M3	turquoise	-0.0531120476706493	-0.0467841987503407	-0.0330766554146521	0.0682451462390267	0.0553956239963008	0.00346777124883496	0.0256325436596947
Nlrc5	M3	turquoise	0.00854807195869223	0.0307606721287853	-0.0488747260609957	0.0224397306100979	-0.0182060542649535	0.0170180193155784	-0.00935507896380627
Lrrc75aos2	grey	grey	-0.0419005076978518	0.0165365665349216	0.00542670081432678	0.0455843740971127	0.0761662568136513	0.0739556408784267	0.0621720997444046
Dnajc27	M4	brown	-0.0790155397872208	-0.0236484524375701	0.0573093957145645	0.128019726618349	0.0638207657155754	0.0762271726511001	0.117251636112891
Flvcr2	grey	grey	0.0318306565850264	0.00172263426448929	-0.123534622363057	0.0156823697366145	0.00457286915206274	0.0919883483188606	0.0667236639921022
Zfat	M1	blue	0.00839481055096504	0.0505538374144108	0.0188038722284383	-0.00271505543890286	-0.00671760611978047	0.0139174812070363	0.0237949757561505
Hsd3b7	M3	turquoise	0.260104139052546	0.216869655345425	-0.00496646400687613	-0.303630267293532	-0.285292084278032	-0.0566112612838659	-0.165890531818673
Lonrf3	M5	green	-0.0430670406032973	-0.0206719925337683	-0.0371421641237222	0.103506147395022	0.0843111720746483	0.125356635962018	0.108048855217169
Klhl12	grey	grey	-0.00777101617387945	-0.00748622811380189	-0.0352028581037821	0.0296989491061989	-0.0039086367550126	0.0396487381317031	0.0347120193028282
Prom1	M1	blue	-0.187809679857705	-0.0724427529846881	0.0704680251288581	0.161562346577252	0.151122445651153	0.0202916623790188	0.11509096788069
Nav3	M1	blue	-0.0293007835949544	-0.00275279461395062	0.100565200371701	-0.0387289929190788	0.00881913733106814	-0.0337634171557894	-0.00166735187811934
Spaar	grey	grey	0.0656273301405282	0.0855130709146939	0.0477269360777265	-0.114366008305615	-0.10560738852855	-0.0717886499859686	-0.105363240718616
BC024978	M1	blue	-0.12562060220855	-0.0857035156524208	0.0172403228629391	0.153827285469832	0.129665387454688	0.0495424056772469	0.152885941901601
Hmgn5	M1	blue	0.00915245247471839	-0.0205087392094943	0.0309584577274398	-0.00287404437553522	-0.061807736965714	-0.0180273311365988	0.00277609621273799
F2r	M1	blue	-0.251623100550801	-0.163939576071946	0.153103217003229	0.159155955927948	0.151847302313594	-0.0698803187011047	0.067864998604763
Fzd4	M3	turquoise	0.208185612544161	0.126236623358642	-0.318633597692965	-0.137061684399181	-0.110961227372066	0.130998935391057	-0.0572846131864567
Sp110	M3	turquoise	0.0781797897538388	0.00382415184193003	-0.161037182703917	-0.0289710959224516	-0.0775087582786986	0.0965283108973024	0.0166109835044309
Phf2	M2	yellow	-0.109056512608388	-0.133168951486193	-0.0301115439485721	0.0865124247165013	0.0867438924808752	-0.0267832893652105	0.0197167266825333
Arhgap32	grey	grey	-0.0587112874965049	0.0014631177753692	0.0182292294231628	0.000168220918748097	0.038097084419719	-0.0726366771218902	-0.0214191799469828
Cep104	grey	grey	-0.0611565841927149	-0.0712190310596458	0.014523882845151	0.051577168896031	0.0609416119516214	0.00399063815063866	0.0728804297451053
Mturn	M2	yellow	-0.0946790068413087	-0.182186137257913	-0.0364203625057053	0.0695970452344269	0.0908294083647655	-0.0148720021824587	-0.0150022894507949
Lrig3	M3	turquoise	0.0391739751967155	0.0594649948679272	-0.0266021450111697	-0.0344616236342455	-0.0375818495950526	0.0705702715960551	0.0415694243104779
Socs2	M6	red	-0.344659404393759	-0.168743371650494	7.25535753352736e-05	0.328187085045218	0.308341211402883	0.105407338126263	0.2719373876984
Rhob	M6	red	-0.344260183888366	-0.212351433434845	-0.0235527317009215	0.406616773353964	0.262550251511398	0.363988969049854	0.493899056819565
Pls3	M2	yellow	0.0095016316953327	-0.0860581822098865	-0.12649401667661	0.0131533837688918	-0.00894663587123061	0.129017557924946	0.0687293110279675
L3mbtl3	M3	turquoise	-0.115911860422355	-0.0990070217833169	-0.0925569878646071	0.112558751130909	0.162376265388089	0.0125607377758833	0.0262589780361296
Ehd3	M1	blue	-0.173325154251864	-0.119042545800935	0.0460072363006758	0.143418509886053	0.14451614486937	0.00169415450897413	0.0828573802092225
Xdh	grey	grey	-0.174112932264579	-0.15969507352974	-0.268866907866761	0.218527236933609	0.328679306973333	0.118121216648464	0.140459990554659
Meis1	M3	turquoise	-0.189149633122925	-0.170404686786673	-0.0823780434506511	0.195851533255925	0.239504760940337	0.0075624728418119	0.0992685569527869
Col23a1	M4	brown	-0.37398523228885	-0.243070830649157	0.135341724000592	0.292282271006665	0.312333037706864	-0.00838456295982774	0.184697441606466
Thoc2	grey	grey	-0.0476196942374222	-0.0334660040507873	-0.0881625240466959	0.0647443460835109	0.0698301641537021	0.109799851541664	0.099358689097214
Cry2	M5	green	-0.18948610316696	-0.0960201754309381	-0.0229638270495433	0.228263277572709	0.190817776483932	0.157769856777023	0.247741134745062
Abhd5	M3	turquoise	-0.0573639480665166	-0.0521899621250429	-0.100296370837833	0.105841484524581	0.0953478476493839	0.0314487746758828	0.0466181948967635
Prkaa2	M5	green	-0.124712753591293	-0.0761637150467439	-0.0435151511423407	0.113094383905988	0.137964666274846	0.0631572371156685	0.0916643945833948
Cit	M3	turquoise	0.0726085013339497	0.0233774541706281	-0.141022562494639	-0.0216276992387372	-0.0451230777161144	0.0627240707677692	-0.0157390763736863
Tceanc2	M1	blue	-0.0877651620157909	-0.0334757848323243	0.00855437249771305	0.0797408515849791	0.108081596064232	-0.000443450686402396	0.0251890274820485
Slc24a5	M3	turquoise	0.0472144785000647	-0.00917598042043621	-0.122752048359001	0.0335369607072825	-0.0138808976393215	0.104073815621545	0.0493383006650425
Cx3cl1	M3	turquoise	0.047391856222349	-0.0242722444773281	-0.131972564451451	0.0317936250393691	-0.0346870943377381	0.186738855410986	0.0886537672389231
Herc1	M3	turquoise	-0.00143103303453622	-0.010521458013192	-0.0545790442464798	-0.0158040546816241	0.0081690780239521	0.0137472081559903	0.0254732068355945
Irf2bpl	M3	turquoise	-0.0554700342986898	-0.11973003341552	-0.19843858907252	0.0901742050994856	0.0918608626368793	0.199248622690748	0.119527067469933
Zfp346	M2	yellow	-0.215933791930886	-0.112552864182408	0.00709813727707099	0.180521133421725	0.187455432753351	-0.0119876786971947	0.0673262871259513
Ccnc	M1	blue	-0.111651989076936	-0.0745097107095911	0.00700855456261192	0.0943501266541467	0.0828333960145924	-0.00373219084237106	0.0374525127065837
Zc3h13	grey	grey	-0.0524551015427846	-0.0909500033536313	-0.075975275677331	0.0235450432633075	0.0624999856215399	0.00840533988997347	0.0241805015131953
Zeb2	grey	grey	-0.38045830126007	-0.333877652300576	-0.0674026361475511	0.365708355868163	0.449328884275865	0.0761847670406424	0.241704717799289
Tst	M4	brown	-0.324103712852938	-0.167337508830446	0.0764651215255704	0.287169541441361	0.269924061162974	9.29354513638387e-05	0.169057772935207
Piezo2	grey	grey	-0.0496733667555258	-0.149305797001911	-0.119846847749941	-0.00967278171741009	0.124253785679273	-0.0623630992441174	-0.0984164828866111
Larp4b	M2	yellow	-0.0150048956723435	-0.0754499596251138	-0.0271272907090234	0.000854503182445746	0.0446701595834341	-0.0102513509780131	-0.005205080048531
Pggt1b	M1	blue	-0.0735463384861203	-0.0475473710172959	-0.0497995915469228	0.0482239354047661	0.0890609342214226	0.00796069559486927	0.0362293538788968
Ehbp1l1	grey	grey	0.0690925520802051	-0.00640604476263712	-0.207982796287302	0.0397928309796975	-0.0271496916986401	0.164380673253504	0.111142541364921
Sinhcaf	M2	yellow	-0.0358147901959387	-0.149066458660604	-0.162580387321987	0.0743128178722565	0.104537412872412	0.0470062892604188	0.0126862539134728
Epha4	M3	turquoise	0.1323762519563	0.0847719540811481	-0.200964217260368	-0.0454575736637376	-0.0747272384756193	0.133693069291959	0.01576571252909
Sertad3	grey	grey	-0.0605889974275397	-0.0955042455687236	-0.0283881549010098	0.071687848877701	0.0835167776604242	0.0702098936719509	0.0847726712305645
Nos1ap	M3	turquoise	0.0700730280179541	0.0744041593240646	-0.0530847198479674	-0.0584612240940141	-0.0873337429196043	0.041727460489999	0.0408943269217235
Slc13a4	M1	blue	-0.273818761003129	-0.193532293469302	0.072259647807201	0.21552260083217	0.230036382640428	-0.0402939569465377	0.0944569654980831
Hmgb2	M6	red	-0.099634287510494	-0.0645636929337295	-0.107160175830975	0.173978387774142	0.121170562059041	0.205132642962403	0.212869867773188
Syne2	M1	blue	-0.114890022930421	-0.185597809809212	-0.167688022222075	0.153690376658993	0.155907196350543	0.131722408525724	0.11404299448743
Lpin1	M1	blue	-0.367671256112261	-0.197518356731783	0.123068693116653	0.305025538762124	0.345280874698401	-0.00363628050853878	0.181596822172237
Plekhg2	M5	green	-0.151904565988535	-0.0707436106673245	-0.0736268263978674	0.232863935267582	0.18211674646756	0.244588845114494	0.285233547446601
Arhgap6	M6	red	-0.219478925116996	-0.115989768951059	0.0600382353180476	0.185758450999366	0.191996394516197	0.0406560702799341	0.196484744953677
Slc16a9	M3	turquoise	-0.184682044993648	-0.106604690103916	-0.0792653926378356	0.182131450388998	0.204301484973659	0.0463307090654639	0.0622175581600983
Klf7	M3	turquoise	0.0782657825207144	-0.015656183496931	-0.374418807581596	-0.0217236548787407	0.0103659747643608	0.294939693698003	0.079722807005807
Larp1b	M6	red	-0.127657577669576	-0.0987275653583289	-0.0752738741779403	0.172161961979319	0.129468818808357	0.130444885017443	0.201896512670058
Thap2	grey	grey	-0.133685367679386	-0.0714267389828003	-0.0479060809288043	0.169428631817875	0.1367221897681	0.0750700141934813	0.100207461858525
Zfp703	M1	blue	-0.125863003441285	-0.115478659325556	0.0194696858985098	0.136377252728094	0.119087466830054	0.0950785887845774	0.200251617181357
Ptk7	M1	blue	-0.394261865128891	-0.264787941258236	0.150159013322059	0.354774414124926	0.315391267512287	-0.00365281537295268	0.230495100218549
Ninj1	M3	turquoise	0.257153930442447	0.146558721878427	-0.267383872176826	-0.130893356218955	-0.221824932929703	0.214063097044211	-0.0069359426152849
Nkd1	M3	turquoise	-0.104302841690212	-0.23891218474051	-0.367628958363659	0.137399790418805	0.267289907149755	0.155684082153203	0.0538816812572331
Dusp23	M3	turquoise	0.00484803223669869	0.0285260659957224	-0.141998864981692	0.0355878504434895	0.0416776276361575	0.0833850279373204	0.0253059420224216
