# Supplementary material for: Single-Cell Transcriptomic Profiles of Lung Pre-Metastatic Niche Reveal Neutrophil and Lymphatic Endothelial Cell Roles in Breast Cancer
Source: Cancers (Basel). 2022 Dec 28;15(1):176. doi: 10.3390/cancers15010176 (PMC9818165; doi:10.3390/cancers15010176)
Supplement: Supplementary file 1 [file cancers-15-00176-s001.zip › Table S15.xlsx]

## Sheet: M1_DAVID_PATHWA_KEGG
Category	Term	Count	%	PValue	-LOG10(Pvalue)	Genes	List Total	Pop Hits	Pop Total	Fold Enrichment	Bonferroni	Benjamini	FDR
KEGG_PATHWAY	mmu05165:Human papillomavirus infection	15	3.17797	0.0426839	1.36974	PTGER4, LAMA4, WNT5A, FN1, H2-Q2, LAMB1, COL1A1, HEYL, COL1A2, COL6A2, COL6A1, ITGA8, COL6A3, COL4A5, WNT2	210	362	8977	1.77131	0.999983	0.467667	0.449109
KEGG_PATHWAY	mmu04010:MAPK signaling pathway	13	2.75424	0.0418912	1.37788	PDGFRA, ANGPT2, ANGPT1, PLA2G4A, CACNA1D, VEGFD, PRKCA, HSPA2, EFNA4, FGF2, CACNB2, MECOM, FGFR4	210	294	8977	1.8902	0.999979	0.467667	0.449109
KEGG_PATHWAY	mmu04810:Regulation of actin cytoskeleton	11	2.33051	0.0328255	1.48379	ENAH, PDGFRA, GSN, ACTN1, F2R, ITGA8, FN1, FGFR4, MYH10, FGF2, MYLK	210	220	8977	2.13738	0.999778	0.393906	0.378275
KEGG_PATHWAY	mmu04971:Gastric acid secretion	6	1.27119	0.0302349	1.51949	CAR2, ATP1A2, PRKCA, ATP1B1, KCNK2, MYLK	210	75	8977	3.41981	0.999564	0.38096	0.365842
KEGG_PATHWAY	mmu04979:Cholesterol metabolism	5	1.05932	0.0267467	1.57273	LRP1, SORT1, APOC1, ANGPTL4, APOE	210	49	8977	4.362	0.998921	0.354745	0.340668
KEGG_PATHWAY	mmu00564:Glycerophospholipid metabolism	7	1.48305	0.0265695	1.57562	LPGAT1, PLA2G4A, LPIN1, PLPP3, LCLAT1, AGPAT2, LPIN3	210	98	8977	3.0534	0.998871	0.354745	0.340668
KEGG_PATHWAY	mmu04970:Salivary secretion	7	1.48305	0.0141183	1.85022	CST3, GUCY1A1, GUCY1B1, PRKG2, ATP1A2, PRKCA, ATP1B1	210	85	8977	3.52039	0.972213	0.209283	0.200979
KEGG_PATHWAY	mmu04730:Long-term depression	6	1.27119	0.0126253	1.89876	GUCY1A1, GUCY1B1, PRKG2, PLA2G4A, PRKCA, GRIA3	210	60	8977	4.27476	0.959313	0.198849	0.190958
KEGG_PATHWAY	mmu05133:Pertussis	7	1.48305	0.00891164	2.05004	C3, C1S1, SERPING1, IRF8, HC, SFTPA1, C2	210	77	8977	3.88615	0.89521	0.149715	0.143774
KEGG_PATHWAY	mmu04924:Renin secretion	7	1.48305	0.00837536	2.077	PTGER4, EDNRA, GUCY1A1, GUCY1B1, EDN3, PRKG2, CACNA1D	210	76	8977	3.93728	0.879906	0.149715	0.143774
KEGG_PATHWAY	mmu05205:Proteoglycans in cancer	12	2.54237	0.0083439	2.07863	COL1A1, COL1A2, LUM, SDC2, MMP2, WNT5A, FN1, GPC3, PRKCA, FGF2, WNT2, DCN	210	205	8977	2.5023	0.878942	0.149715	0.143774
KEGG_PATHWAY	mmu04611:Platelet activation	9	1.90678	0.00828078	2.08193	COL1A1, GUCY1A1, COL3A1, GUCY1B1, COL1A2, F2R, PRKG2, PLA2G4A, MYLK	210	124	8977	3.10265	0.876984	0.149715	0.143774
KEGG_PATHWAY	mmu04022:cGMP-PKG signaling pathway	11	2.33051	0.00709856	2.14883	EDNRA, GUCY1A1, GUCY1B1, PDE2A, KCNMB2, PRKG2, CACNA1D, ATP1A2, PDE5A, ATP1B1, MYLK	210	173	8977	2.71806	0.833908	0.149715	0.143774
KEGG_PATHWAY	mmu04350:TGF-beta signaling pathway	8	1.69492	0.00656852	2.18253	BMP4, GREM2, BMP2, BAMBI, FMOD, NBL1, DCN, BMP5	210	95	8977	3.5998	0.809999	0.149715	0.143774
KEGG_PATHWAY	mmu05146:Amoebiasis	9	1.90678	0.00342479	2.46537	COL1A1, COL3A1, COL1A2, LAMA4, ACTN1, FN1, COL4A5, LAMB1, PRKCA	210	107	8977	3.59559	0.57875	0.0958941	0.0920887
KEGG_PATHWAY	mmu04270:Vascular smooth muscle contraction	11	2.33051	0.0019237	2.71586	PPP1R14A, EDNRA, GUCY1A1, GUCY1B1, EDN3, KCNMB2, PLA2G4A, CACNA1D, PRKCA, MYH10, MYLK	210	144	8977	3.26544	0.38445	0.0605966	0.058192
KEGG_PATHWAY	mmu05200:Pathways in cancer	25	5.29661	0.00179448	2.74606	PTGER4, LAMA4, IL6RA, FGF2, EDNRA, MECOM, WNT2, PDGFRA, IFNGR1, MMP2, WNT5A, F2R, FN1, LAMB1, VEGFD, PRKCA, TRAF1, RUNX1, BMP4, HEYL, AR, BMP2, GSTA3, COL4A5, FGFR4	210	543	8977	1.96812	0.364037	0.0605966	0.058192
KEGG_PATHWAY	mmu04151:PI3K-Akt signaling pathway	20	4.23729	0.000693	3.1595	PDGFRA, ANGPT2, ANGPT1, LAMA4, F2R, FN1, IL6RA, LAMB1, VEGFD, PRKCA, EFNA4, FGF2, COL1A1, COL1A2, COL6A2, COL6A1, ITGA8, COL6A3, COL4A5, FGFR4	210	359	8977	2.38148	0.160209	0.0290902	0.0279359
KEGG_PATHWAY	mmu04933:AGE-RAGE signaling pathway in diabetic complications	10	2.11864	0.000554	3.25646	COL1A1, COL3A1, VCAM1, COL1A2, MMP2, FN1, NOX4, COL4A5, VEGFD, PRKCA	210	101	8977	4.23244	0.130344	0.0279237	0.0268157
KEGG_PATHWAY	mmu04610:Complement and coagulation cascades	10	2.11864	0.0003	3.52359	C3, C1S1, CD59A, CFH, C7, F2R, SERPING1, HC, CFB, C2	210	93	8977	4.59652	0.0727095	0.0188693	0.0181205
KEGG_PATHWAY	mmu04510:Focal adhesion	15	3.17797	0.000243	3.61418	PDGFRA, LAMA4, ACTN1, FN1, LAMB1, VEGFD, PRKCA, MYLK, COL1A1, COL1A2, COL6A2, COL6A1, ITGA8, COL6A3, COL4A5	210	201	8977	3.19012	0.0594341	0.0188693	0.0181205
KEGG_PATHWAY	mmu04512:ECM-receptor interaction	11	2.33051	3.5e-05	4.45623	COL1A1, COL1A2, COL6A2, LAMA4, COL6A1, ITGA8, FN1, COL6A3, COL4A5, LAMB1, NPNT	210	88	8977	5.34345	0.00877532	0.00440695	0.00423207
KEGG_PATHWAY	mmu04974:Protein digestion and absorption	15	3.17797	1.81e-07	6.74301	COL18A1, SLC36A2, MME, COL13A1, ELN, ATP1A2, ATP1B1, COL1A1, COL3A1, COL1A2, COL6A2, COL5A2, COL6A1, COL6A3, COL4A5	210	108	8977	5.93717	4.55e-05	4.55e-05	4.37e-05
KEGG_PATHWAY	mmu00561:Glycerolipid metabolism	5	1.05932	0.0559372		LPIN1, PLPP3, LCLAT1, AGPAT2, LPIN3	210	62	8977	3.44739	0.999999	0.587341	0.564033
KEGG_PATHWAY	mmu04015:Rap1 signaling pathway	10	2.11864	0.0623031		ENAH, PDGFRA, ANGPT2, ANGPT1, F2R, VEGFD, PRKCA, FGFR4, EFNA4, FGF2	210	214	8977	1.99755	1	0.611833	0.587554
KEGG_PATHWAY	mmu04666:Fc gamma R-mediated phagocytosis	6	1.27119	0.0631256		GSN, PLA2G4A, AMPH, PRKCA, PLPP3, WASF3	210	92	8977	2.78789	1	0.611833	0.587554
KEGG_PATHWAY	mmu05202:Transcriptional misregulation in cancer	10	2.11864	0.0780751		CEBPB, CDKN2C, MAF, IGFBP3, ETV1, NUPR1, TRAF1, PROM1, GRIA3, RUNX1	210	224	8977	1.90838	1	0.698751	0.671023
KEGG_PATHWAY	mmu04713:Circadian entrainment	6	1.27119	0.0781832		GUCY1A1, GUCY1B1, PRKG2, CACNA1D, PRKCA, GRIA3	210	98	8977	2.6172	1	0.698751	0.671023
KEGG_PATHWAY	mmu04926:Relaxin signaling pathway	7	1.48305	0.0804118		COL1A1, COL3A1, COL1A2, MMP2, COL4A5, VEGFD, PRKCA	210	129	8977	2.31964	1	0.698751	0.671023
KEGG_PATHWAY	mmu04964:Proximal tubule bicarbonate reclamation	3	0.635593	0.0919336		CAR2, ATP1A2, ATP1B1	210	22	8977	5.82922	1	0.760206	0.730039
KEGG_PATHWAY	mmu04918:Thyroid hormone synthesis	5	1.05932	0.0935174		GPX1, GPX3, ATP1A2, PRKCA, ATP1B1	210	74	8977	2.88835	1	0.760206	0.730039
