# Supplementary material for: Single-Cell Transcriptomic Profiles of Lung Pre-Metastatic Niche Reveal Neutrophil and Lymphatic Endothelial Cell Roles in Breast Cancer
Source: Cancers (Basel). 2022 Dec 28;15(1):176. doi: 10.3390/cancers15010176 (PMC9818165; doi:10.3390/cancers15010176)
Supplement: Supplementary file 1 [file cancers-15-00176-s001.zip › Table S16.xlsx]

## Sheet: M2_DAVID_PATHWA_KEGG
Category	Term	Count	%	PValue	-LOG10(Pvalue)	Genes	List Total	Pop Hits	Pop Total	Fold Enrichment	Bonferroni	Benjamini	FDR
KEGG_PATHWAY	mmu04510:Focal adhesion	7	4.92958	0.00196328	2.70702	CCND1, COL4A4, RAC2, SPP1, PDGFA, MYL9, ITGA9	60	201	8977	5.21053	0.256768	0.279641	0.279641
KEGG_PATHWAY	mmu04530:Tight junction	6	4.22535	0.00467342	2.33037	EPB41L4B, CCND1, MYH14, CLDN18, CGN, MYL9	60	167	8977	5.37545	0.507046	0.279641	0.279641
KEGG_PATHWAY	mmu04514:Cell adhesion molecules	6	4.22535	0.00555578	2.25526	ALCAM, CDH1, CLDN18, CD226, PTPRF, ITGA9	60	174	8977	5.1592	0.568834	0.279641	0.279641
KEGG_PATHWAY	mmu04520:Adherens junction	4	2.8169	0.0112334	1.94949	CDH1, RAC2, LMO7, PTPRF	60	71	8977	8.42911	0.818381	0.37328	0.37328
KEGG_PATHWAY	mmu04371:Apelin signaling pathway	5	3.52113	0.0123603	1.90797	RYR1, CCND1, CDH1, SPP1, AGTR1A	60	137	8977	5.46046	0.847109	0.37328	0.37328
KEGG_PATHWAY	mmu04933:AGE-RAGE signaling pathway in diabetic complications	4	2.8169	0.0285346	1.54463	CCND1, COL4A4, AGER, AGTR1A	60	101	8977	5.92541	0.987366	0.718121	0.718121
KEGG_PATHWAY	mmu04810:Regulation of actin cytoskeleton	5	3.52113	0.056139	1.25074	RAC2, MYH14, PDGFA, MYL9, ITGA9	60	220	8977	3.40038	0.999837	1	1
KEGG_PATHWAY	mmu04270:Vascular smooth muscle contraction	4	2.8169	0.0686166	1.16357	NPPC, MYH14, MYL9, AGTR1A	60	144	8977	4.15602	0.999978	1	1
KEGG_PATHWAY	mmu05218:Melanoma	3	2.11268	0.0810403	1.0913	CCND1, CDH1, PDGFA	60	72	8977	6.23403	0.999997	1	1
KEGG_PATHWAY	mmu04151:PI3K-Akt signaling pathway	6	4.22535	0.0860753	1.06512	CCND1, BDNF, COL4A4, SPP1, PDGFA, ITGA9	60	359	8977	2.50056	0.999999	1	1
