# Supplementary material for: Single-Cell Transcriptomic Profiles of Lung Pre-Metastatic Niche Reveal Neutrophil and Lymphatic Endothelial Cell Roles in Breast Cancer
Source: Cancers (Basel). 2022 Dec 28;15(1):176. doi: 10.3390/cancers15010176 (PMC9818165; doi:10.3390/cancers15010176)
Supplement: Supplementary file 1 [file cancers-15-00176-s001.zip › Table S17.xls]

## Sheet: Sheet0
© 2000-2022 QIAGEN. All rights reserved.
Ingenuity Canonical Pathways	-log(p-value)	Ratio	z-score	Molecules
Thyroid Hormone Metabolism II (via Conjugation and/or Degradation)	0.611	0.111	-2	Sult1d1,UGT1A4,UGT1A6,Ugt1a7c
Granulocyte Adhesion and Diapedesis	4.23	0.153	#NUM!	2610528A11Rik,ACKR4,C5,C5AR1,Ccl2,CCL3L3,CCL4,CCL5,Ccl6,Ccl7,Ccl9,CCR10,CLDN1,CLDN12,CLDN24,CLDN4,CLDN8,CSF3,HRH2,HRH4,IL1B,IL1RL2,ITGA4,ITGB2,MMP3,MMP9,SDC1,SELP,SELPLG
GP6 Signaling Pathway	3.69	0.165	-0.943	APBB1IP,BTK,COL15A1,COL28A1,COL2A1,COL4A3,COL5A3,COL9A3,FCER1G,GP6,GRAP2,ITK,LAMA3,LAMB3,LAT,NOX1,PIK3C2G,PIK3R6,PRKCQ,PRKD1,VAV3
Role of NFAT in Cardiac Hypertrophy	0.413	0.0769	-2	ADCY1,ADCY3,ADCY8,CACNA1A,CACNA2D4,CACNB1,IL11,LIF,MAPK11,MAPK12,MAPK13,MEF2B,PIK3C2G,PIK3R6,PLCD4,PRKCQ,PRKD1
Parkinson's Signaling	3.29	0.375	#NUM!	CASP9,MAPK11,MAPK12,MAPK13,SNCA,SNCAIP
Agranulocyte Adhesion and Diapedesis	2.95	0.131	#NUM!	2610528A11Rik,ACKR4,ACTG2,C5,C5AR1,Ccl2,CCL3L3,CCL4,CCL5,Ccl6,Ccl7,Ccl9,CCR10,CLDN1,CLDN12,CLDN24,CLDN4,CLDN8,IL1B,ITGA4,ITGA6,ITGB2,MMP3,MMP9,MYL3,MYL4,SELP,SELPLG
Sertoli Cell-Sertoli Cell Junction Signaling	2.88	0.131	#NUM!	ACTG2,ACTN2,CDH1,CGN,CLDN1,CLDN12,CLDN24,CLDN4,CLDN8,IGSF5,ITGA4,ITGA6,ITGAE,ITGB2,ITGB4,ITGB8,MAP3K13,MAP3K4,MAPK11,MAPK12,MAPK13,OCLN,TUBA4A,TUBA8,TUBB2B,TUBB3,TUBB4A
Osteoarthritis Pathway	2.65	0.123	-1.964	ANKH,CASP9,CASQ1,COL2A1,DKK1,ELF3,FRZB,FZD9,GLI1,GLIS1,IL1B,IL1RL2,ITGA4,ITGA6,ITGAE,ITGB2,ITGB4,ITGB8,LEF1,MMP3,MMP9,PRKAA2,PTCH2,S100A9,SERPINA12,SMAD9,SOX9,WNT3A,WNT8B
Dermatan Sulfate Biosynthesis (Late Stages)	0.39	0.087	-2	CHST1,GAL3ST2,HS3ST3B1,Sult1d1
Glycine Betaine Degradation	2.44	0.4	-1	PIPOX,SARDH,SDSL,SHMT1
Axonal Guidance Signaling	2.31	0.102	#NUM!	ABLIM2,ADAM33,ADAMTS19,ADAMTS7,ECE2,EFNA3,EFNA5,EPHA4,FES,FZD9,GLI1,GLIS1,GNA14,GNAO1,ITGA4,ITGA6,ITGAE,ITGB2,ITGB4,ITGB8,KCNJ12,L1CAM,MMP3,MMP9,MYL3,MYL4,NTNG1,NTNG2,PDGFB,PDGFD,PIK3C2G,PIK3R6,PITRM1,PLCD4,PRKCQ,PRKD1,PTCH2,RAC2,SEMA3D,SEMA4F,SEMA6B,SEMA7A,STK36,TUBA4A,TUBA8,TUBB2B,TUBB3,TUBB4A,UNC5B,WNT3A,WNT8B
Caveolar-mediated Endocytosis Signaling	2.23	0.16	#NUM!	ACTG2,ALB,CD55,FLNC,HLA-A,ITGA4,ITGA6,ITGAE,ITGB2,ITGB4,ITGB8,ZBTB12
Chondroitin Sulfate Biosynthesis (Late Stages)	0.342	0.0816	-2	CHST1,GAL3ST2,HS3ST3B1,Sult1d1
Role of WNT/GSK-3β Signaling in the Pathogenesis of Influenza	0.326	0.0769	-2	APC2,FZD9,Ifnz (includes others),LEF1,WNT3A,WNT8B
STAT3 Pathway	2.19	0.133	-1.732	CSF2RB,FLT4,HGF,IL13RA2,IL17RE,IL1B,IL1RL2,IL21R,IL27RA,IL2RG,IL31RA,IL5RA,MAPK11,MAPK12,MAPK13,PDGFB,PTPN2,SOCS1
Role of NFAT in Regulation of the Immune Response	0	0.029	-2	BTK,CD4,CD79A,CD86,FCER1A,FCER1G,FCGR2A,GNA14,GNAO1,HLA-A,ITK,LAT,MEF2B,PIK3C2G,PIK3R6,PRKCQ,Trbc1
Sphingosine-1-phosphate Signaling	2.04	0.134	-0.775	ADCY1,ADCY3,ADCY8,CASP9,CASQ1,PDGFB,PDGFD,PIK3C2G,PIK3R6,PLCD4,RAC2,RHOF,RHOH,RHOV,S1PR4,SMPD4
Th1 Pathway	2	0.133	-1.291	CD274,CD4,CD86,DLL1,DLL4,GATA3,HLA-A,ICOS,IL12B,IL27RA,ITGB2,NOTCH3,PIK3C2G,PIK3R6,PRKCQ,SOCS1
Role of Pattern Recognition Receptors in Recognition of Bacteria and Viruses	1.9	0.123	-1.155	C5,C5AR1,CCL5,CNTF,IL11,IL12B,IL1B,Il31,LIF,LTB,MAPK12,NOD2,PIK3C2G,PIK3R6,PRKCQ,PRKD1,RIPK2,TLR9,TNFSF8
Sonic Hedgehog Signaling	1.85	0.207	1.342	ARRB2,DYRK1B,GLI1,GLIS1,PTCH2,STK36
Hepatic Cholestasis	1.84	0.116	#NUM!	ABCB4,ABCC2,ADCY1,ADCY3,ADCY8,CNTF,IL11,IL12B,IL1B,IL1RL2,Il31,IRAK4,LBP,LIF,LTB,MAP3K4,MAPK12,NR1H4,PRKCQ,PRKD1,SLC10A1,TNFSF8
Production of Nitric Oxide and Reactive Oxygen Species in Macrophages	1.84	0.116	-0.688	ALB,APOA2,APOC4,MAP3K13,MAP3K4,MAPK11,MAPK12,MAPK13,NCF2,NCF4,PIK3C2G,PIK3R6,PPM1J,PPP1R3C,PPP2R2C,PRKCQ,PRKD1,RAC2,RHOF,RHOH,RHOV,SPI1
FXR/RXR Activation	1.81	0.127	#NUM!	ABCB4,ABCC2,AHSG,ALB,APOA2,APOC4,C4A/C4B,IL1B,ITIH4,LCAT,MAPK12,NR1H4,SCARB1,SDC1,SERPINF1,SLC10A1
Docosahexaenoic Acid (DHA) Signaling	1.81	0.184	#NUM!	BCL2A1,BIK,CASP9,IL1B,PIK3C2G,PIK3R6,SERPINF1
Primary Immunodeficiency Signaling	1.81	0.161	#NUM!	ADA,BTK,CD4,CD79A,ICOS,IGKC,IL2RG,TNFRSF13B,UNG
Mitotic Roles of Polo-Like Kinase	1.79	0.152	0	CDC20,CDC25C,CDC7,CHEK2,FBXO5,KIF11,PKMYT1,PPM1J,PPP2R2C,PRC1
Th1 and Th2 Activation Pathway	1.79	0.118	#NUM!	CD274,CD4,CD86,DLL1,DLL4,GATA3,HLA-A,ICOS,IL12B,IL27RA,IL2RG,ITGB2,JAG2,NOTCH3,PIK3C2G,PIK3R6,PRKCQ,SOCS1,SPI1,STAT5A
Macropinocytosis Signaling	1.77	0.145	0	ANKFY1,HGF,ITGB2,ITGB4,ITGB8,PDGFB,PDGFD,PIK3C2G,PIK3R6,PRKCQ,PRKD1
Role of CHK Proteins in Cell Cycle Checkpoint Control	1.76	0.158	-1.633	ATM,BRCA1,CDC25C,CHEK2,CLSPN,PPM1J,PPP2R2C,RFC3,RFC5
Phospholipase C Signaling	0	0.0444	-2	ADCY1,ADCY3,ADCY8,BTK,CD79A,FCER1G,FCGR2A,GPLD1,GRAP2,IGKC,ITGA4,ITGA6,ITGAE,ITGB2,ITGB4,ITGB8,ITK,LAT,MEF2B,MYL3,MYL4,PLCD4,PLD4,PRKCQ,PRKD1,RAC2,RHOF,RHOH,RHOV,Trbc1
Atherosclerosis Signaling	1.72	0.124	#NUM!	ALB,ALOXE3,APOA2,APOC4,COL2A1,COL5A3,IL1B,ITGA4,ITGB2,LCAT,MMP3,MMP9,PDGFB,PDGFD,SELP,SELPLG
TGF-β Signaling	0	0.0625	-2	INHBB,MAPK11,MAPK12,MAPK13,PIAS4,SMAD9
Toll-like Receptor Signaling	1.69	0.141	-0.707	IL12B,IL1B,IRAK4,LBP,MAPK11,MAPK12,MAPK13,SIGIRR,TLR9,TNFAIP3,TRAF4
IL-7 Signaling Pathway	1.69	0.141	-0.333	EBF1,FOXO6,HGF,IL2RG,MAPK11,MAPK12,MAPK13,PIK3C2G,PIK3R6,SOCS1,STAT5A
Folate Transformations I	1.68	0.333	#NUM!	MTHFD1L,MTHFD2L,SHMT1
Natural Killer Cell Signaling	1.67	0.112	-1.964	COL2A1,COL5A3,FCER1G,FCGR2A,HLA-A,HSPA1L,IL12B,IRAK4,KLRB1,LAT,MAP3K13,MAP3K4,MAPK11,MAPK12,MAPK13,PIK3C2G,PIK3R6,PRKCQ,RAC2,TYROBP,ULBP1,VAV3
Granzyme B Signaling	1.65	0.25	#NUM!	CASP9,DFFA,ENDOG,PRF1
Apelin Adipocyte Signaling Pathway	1.63	0.133	-0.333	ADCY1,ADCY3,ADCY8,GSTA5,MAPK11,MAPK12,MAPK13,NCF2,NOX1,PLIN1,PRKAA2,RAC2
Fatty Acid β-oxidation III (Unsaturated, Odd Number)	1.57	0.5	#NUM!	Eci3,EHHADH
Role of JAK family kinases in IL-6-type Cytokine Signaling	1.56	0.2	#NUM!	MAPK11,MAPK12,MAPK13,SOCS1,STAT5A
Pulmonary Fibrosis Idiopathic Signaling Pathway	1.1	0.092	-2.043	ACTG2,BIRC5,CDH1,COL15A1,COL28A1,COL2A1,COL4A3,COL5A3,COL9A3,FGF9,FOXO6,FZD9,GLI1,IL11,IL1B,LEF1,MAPK11,MAPK12,MAPK13,MMP3,MMP9,NOTCH3,PDGFB,PDGFD,PIK3C2G,PIK3R6,RPS6KA2,SRF,WNT3A,WNT8B
Th2 Pathway	1.56	0.119	-0.832	CD4,CD86,DLL1,GATA3,HLA-A,ICOS,IL12B,IL2RG,ITGB2,JAG2,NOTCH3,PIK3C2G,PIK3R6,PRKCQ,SPI1,STAT5A
CDK5 Signaling	1.54	0.123	0	ADCY1,ADCY3,ADCY8,CACNA1A,CDK5R1,ITGA6,LAMA3,LAMB3,MAPK11,MAPK12,MAPK13,PPM1J,PPP1R3C,PPP2R2C
Virus Entry via Endocytic Pathways	1.52	0.125	#NUM!	ACTG2,CD55,FLNC,HLA-A,ITGB2,ITGB4,ITGB8,PIK3C2G,PIK3R6,PRKCQ,PRKD1,RAC2,ZBTB12
Hepatic Fibrosis / Hepatic Stellate Cell Activation	1.51	0.109	#NUM!	AGTR1,CCL5,COL15A1,COL28A1,COL2A1,COL4A3,COL5A3,COL9A3,FLT4,HGF,IGF2,IL1B,IL1RL2,LBP,LHX2,MMP9,MYL3,MYL4,PDGFB,PDGFD,TIMP1
Nicotine Degradation II	1.5	0.143	-1.667	Aox2,Aox3,Aox4,CYP2B6,FMO4,Fmo6,UGT1A4,UGT1A6,Ugt1a7c
Endocannabinoid Neuronal Synapse Pathway	1.48	0.114	-0.535	ABHD6,ADCY1,ADCY3,ADCY8,CACNA1A,CACNA2D4,CACNB1,DAGLA,DNAH10,GNA14,GNAO1,GRIA2,GRIN2C,MAPK11,MAPK12,MAPK13,PLCD4
White Adipose Tissue Browning Pathway	1.48	0.116	-1.807	ADCY1,ADCY3,ADCY8,CACNA1A,CACNA2D4,CACNB1,FCER1A,FCER1G,GPBAR1,LDHC,MAPK11,MAPK12,MAPK13,NPPA,PLIN1,PRKAA2
Paxillin Signaling	1.43	0.121	-1.134	ACTG2,ACTN2,ITGA4,ITGA6,ITGAE,ITGB2,ITGB4,ITGB8,MAPK11,MAPK12,MAPK13,PIK3C2G,PIK3R6
Leukocyte Extravasation Signaling	4.46	0.155	-2.4	ACTG2,ACTN2,BTK,CLDN1,CLDN12,CLDN24,CLDN4,CLDN8,ITGA4,ITGB2,ITK,MAP3K4,MAPK11,MAPK12,MAPK13,MMP3,MMP9,NCF2,NCF4,NOX1,PIK3C2G,PIK3R6,PRKCQ,PRKD1,RAC2,RHOH,SELPLG,TEC,TIMP1,VAV3
Integrin Signaling	0.81	0.0905	-2.065	ACTG2,ACTN2,CAPN5,ITGA4,ITGA6,ITGAE,ITGB2,ITGB4,ITGB8,MYLK3,PDGFB,PFN4,PIK3C2G,PIK3R6,RAC2,RHOF,RHOH,RHOV,TNK2	59
Cardiac Hypertrophy Signaling (Enhanced)	3.31	0.109	-3.647	ADCY1,ADCY3,ADCY8,AGTR1,ATP2A1,CACNA1A,CACNA2D4,CACNB1,CNTF,CSF2RB,FGF11,FGF5,FGF9,FZD9,GDPD1,GNA14,HAND2,IL11,IL12B,IL13RA2,IL17RE,IL1B,IL1RL2,IL21R,IL27RA,IL2RG,Il31,IL31RA,IL5RA,ITGA4,ITGA6,ITGAE,ITGB2,ITGB4,ITGB8,LIF,LTB,MAP3K13,MAP3K4,MAPK11,MAPK12,MAPK13,MAPKAPK3,MEF2B,NPPA,PDE1A,PDE6B,PDE7A,PDK1,PIK3C2G,PIK3R6,PLCD4,PRKCQ,PRKD1,RYR1,SRF,TNFSF8,WNT3A,WNT8B
Apelin Cardiomyocyte Signaling Pathway	1.06	0.111	-2.111	ATP2A1,MAPK11,MAPK12,MAPK13,MYL3,MYL4,PIK3C2G,PIK3R6,PLCD4,PRKCQ,PRKD1	66
Cell Cycle Control of Chromosomal Replication	1.39	0.143	-1.414	CDC45,CDC7,CHEK2,MCM3,ORC1,ORC2,POLD1,POLE	67
HMGB1 Signaling	1.37	0.109	-1.941	CNTF,IL11,IL12B,IL1B,Il31,KAT2B,LIF,LTB,MAPK11,MAPK12,MAPK13,PIK3C2G,PIK3R6,RAC2,RHOF,RHOH,RHOV,TNFSF8	5
Complement System	1.37	0.162	-0.447	C4A/C4B,C5,C5AR1,CD55,ITGB2,MASP2	8
Coronavirus Pathogenesis Pathway	0	0.0547	-2.111	AGTR1,BCL2L11,CASP9,CCL5,IL1B,MAPK11,MAPK12,MAPK13,RPS28,TMPRSS2,TRIM25	5
Pyruvate Fermentation to Lactate	1.37	0.4	#NUM!	LDHAL6B,LDHC	5
Tetrahydrofolate Salvage from 5,10-methenyltetrahydrofolate	1.37	0.4	#NUM!	MTHFD1L,MTHFD2L	14
Folate Polyglutamylation	1.37	0.4	#NUM!	MTHFD1L,SHMT1	5
Molecular Mechanisms of Cancer	1.36	0.0926	#NUM!	ADCY1,ADCY3,ADCY8,APC2,ATM,BCL2L11,BRCA1,CASP9,CDC25C,CDH1,CDKN2B,CHEK2,FZD9,GLI1,GNA14,GNAO1,HHAT,ITGA4,ITGA6,ITGAE,ITGB2,ITGB4,ITGB8,LEF1,MAPK11,MAPK12,MAPK13,PIK3C2G,PIK3R6,PRKCQ,PRKD1,PTCH2,RAC2,RHOF,RHOH,RHOV,SMAD9,STK36,SYNGAP1,WNT3A,WNT8B	54
HGF Signaling	1.35	0.114	-0.333	ELF3,HGF,ITGA4,ITGA6,ITGAE,ITGB2,ITGB4,ITGB8,MAP3K13,MAP3K4,MAPK12,PIK3C2G,PIK3R6,PRKCQ,PRKD1	53
Renin-Angiotensin Signaling	1.35	0.116	-1.897	ADCY1,ADCY3,ADCY8,AGTR1,CCL5,MAPK11,MAPK12,MAPK13,NOX1,PIK3C2G,PIK3R6,PRKCQ,PRKD1,SHE	26
Notch Signaling	1.32	0.158	-0.816	DLL1,DLL4,JAG2,LFNG,MFNG,NOTCH3
Remodeling of Epithelial Adherens Junctions	1.32	0.132	#NUM!	ACTG2,ACTN2,CDH1,HGF,TUBA4A,TUBA8,TUBB2B,TUBB3,TUBB4A
Endothelin-1 Signaling	1.32	0.105	-0.943	ADCY1,ADCY3,ADCY8,CASP9,CASQ1,ECE2,GNA14,GNAO1,GPLD1,LCAT,MAPK11,MAPK12,MAPK13,PIK3C2G,PIK3R6,PLCD4,PLD4,PRKCQ,PRKD1,SHE
Germ Cell-Sertoli Cell Junction Signaling	1.29	0.107	#NUM!	ACTG2,ACTN2,CDH1,ITGA6,MAP3K13,MAP3K4,MAPK12,PIK3C2G,PIK3R6,RAC2,RHOF,RHOH,RHOV,TUBA4A,TUBA8,TUBB2B,TUBB3,TUBB4A
Regulation of Actin-based Motility by Rho	1.27	0.115	-1.414	ACTG2,ITGA4,ITGA6,ITGAE,ITGB2,ITGB4,ITGB8,MYL3,MYL4,RAC2,RHOF,RHOH,RHOV
Crosstalk between Dendritic Cells and Natural Killer Cells	1.27	0.121	-2.121	ACTG2,CD86,CSF2RB,FSCN2,HLA-A,IL12B,IL2RG,LTB,PRF1,TLR9,TYROBP
Dilated Cardiomyopathy Signaling Pathway	1.25	0.108	-0.577	ACTG2,ADCY1,ADCY3,ADCY8,CACNA1A,CACNA2D4,CACNB1,CASP9,MAPK11,MAPK12,MAPK13,MYL3,MYL4,TNNI1,TNNT1,TNNT3
Actin Cytoskeleton Signaling	1.24	0.0988	-1.508	ACTG2,ACTN2,APC2,CYFIP2,FGF11,FGF5,FGF9,ITGA4,ITGA6,ITGAE,ITGB2,ITGB4,ITGB8,LBP,MYL3,MYL4,MYLK3,PDGFB,PDGFD,PIK3C2G,PIK3R6,RAC2,SSH3,VAV3
Cell Cycle: G2/M DNA Damage Checkpoint Regulation	1.23	0.14	-1.89	ATM,BORA,BRCA1,CDC25C,CHEK2,KAT2B,PKMYT1
Growth Hormone Signaling	1.22	0.127	0.707	IGF2,PIK3C2G,PIK3R6,PRKCQ,PRKD1,RPS6KA2,SOCS1,SRF,STAT5A
IL-8 Signaling	1.22	0.101	-0.943	ARRB2,CDH1,FLT4,GNA14,GNAO1,GPLD1,IRAK4,ITGB2,MAPK12,MMP9,NCF2,NOX1,PIK3C2G,PIK3R6,PLD4,PRKCQ,PRKD1,RAC2,RHOF,RHOH,RHOV
PAK Signaling	1.17	0.111	-2.121	ITGA4,ITGA6,ITGAE,ITGB2,ITGB4,ITGB8,MAPK12,MYL3,MYL4,PDGFB,PDGFD,PIK3C2G,PIK3R6
14-3-3-mediated Signaling	1.2	0.11	-0.378	EDC3,MAPK12,PIK3C2G,PIK3R6,PLCD4,PRKCQ,PRKD1,SNCA,STRADA,TUBA4A,TUBA8,TUBB2B,TUBB3,TUBB4A
Basal Cell Carcinoma Signaling	1.19	0.125	-0.816	APC2,FZD9,GLI1,GLIS1,LEF1,PTCH2,STK36,WNT3A,WNT8B
Corticotropin Releasing Hormone Signaling	1.18	0.106	-0.535	ADCY1,ADCY3,ADCY8,CACNA1A,CACNA2D4,CACNB1,GAST,GLI1,GNAO1,MAPK11,MAPK12,MAPK13,MEF2B,PRKCQ,PRKD1,PTCH2
Neuregulin Signaling	1.17	0.111	1.134	CDK5R1,ERBB3,ITGA4,ITGA6,ITGAE,ITGB2,ITGB4,ITGB8,NRG4,PRKCQ,PRKD1,STAT5A,TMEFF2
Airway Pathology in Chronic Obstructive Pulmonary Disease	1.17	0.111	#NUM!	CNTF,FGF11,FGF5,FGF9,IL11,IL12B,IL1B,Il31,LIF,LTB,MMP9,PRF1,TNFSF8
Regulation Of The Epithelial Mesenchymal Transition By Growth Factors Pathway	0.712	0.0885	-2.138	CDH1,FGF11,FGF5,FGF9,HGF,LTB,MAPK11,MAPK12,MAPK13,MMP9,OCLN,PDGFB,PDGFD,PIK3C2G,PIK3R6,TNFSF18,TNFSF8
Thrombin Signaling	1.17	0.0987	-1.069	ADCY1,ADCY3,ADCY8,ARHGEF28,ARHGEF37,GATA3,GNA14,GNAO1,MAPK11,MAPK12,MAPK13,MYL3,MYL4,PIK3C2G,PIK3R6,PLCD4,PRKCQ,PRKD1,RAC2,RHOF,RHOH,RHOV
ILK Signaling	1.17	0.101	-0.943	ACTG2,ACTN2,CDH1,FLNC,ITGB2,ITGB4,ITGB8,LEF1,MAPK12,MMP9,MYL3,MYL4,PIK3C2G,PIK3R6,PPM1J,PPP2R2C,RAC2,RHOF,RHOH,RHOV
Histamine Biosynthesis	1.15	1	#NUM!	HDC
Asparagine Biosynthesis I	1.15	1	#NUM!	ASNS
D-mannose Degradation	1.15	1	#NUM!	MPI
UVB-Induced MAPK Signaling	1.15	0.135	-0.816	MAPK11,MAPK12,MAPK13,PIK3C2G,PIK3R6,PRKCQ,PRKD1
DNA Double-Strand Break Repair by Homologous Recombination	1.15	0.214	#NUM!	ATM,BRCA1,GEN1
Cardiac β-adrenergic Signaling	1.12	0.101	0	ADCY1,ADCY3,ADCY8,AKAP6,ATP2A1,CACNA1A,CACNA2D4,CACNB1,GDPD1,GNA14,GNAO1,GRK3,PDE1A,PDE6B,PDE7A,PPM1J,PPP1R3C,PPP2R2C
B Cell Receptor Signaling	0	0.0285	-2.138	APBB1IP,BCL2A1,BTK,CD79A,EBF1,FCGR2A,IGKC,MAP3K13,MAP3K4,MAPK11,MAPK12,MAPK13,PIK3AP1,PIK3C2G,PIK3R6,PRKCQ,RAC2,VAV3
Inhibition of Angiogenesis by TSP1	1.1	0.152	#NUM!	MAPK11,MAPK12,MAPK13,MMP9,SDC1
IL-15 Production	1.1	0.108	-1.387	BTK,EPHA4,ERBB3,FES,FLT4,ITK,KIT,LMTK3,PTK6,SRMS,STYK1,TEC,TNK2
CXCR4 Signaling	1.1	0.102	-1.069	ADCY1,ADCY3,ADCY8,CD4,GNA14,GNAO1,MAPK12,MYL3,MYL4,PIK3C2G,PIK3R6,PRKCQ,PRKD1,RAC2,RHOF,RHOH,RHOV
Hepatic Fibrosis Signaling Pathway	2.51	0.107	-3.333	AGTR1,APC2,CACNA1A,CACNA2D4,CACNB1,CCL5,COL2A1,COL5A3,FLT4,FZD9,GLI1,GLIS1,IL1B,IL1RL2,IRAK4,ITGA4,ITGA6,ITGAE,ITGB2,ITGB4,ITGB8,LEF1,MAPK11,MAPK12,MAPK13,MYL3,MYL4,MYLK3,NCF2,NOX1,PDGFB,PDGFD,PDK1,PIK3C2G,PIK3R6,PRKCQ,PRKD1,PTCH2,RAC2,RHOF,RHOH,RHOV,TIMP1,WNT3A,WNT8B
Tumor Microenvironment Pathway	1.1	0.101	0	CD274,CSF3,FGF11,FGF5,FGF9,FOXO6,HGF,HLA-A,IGF2,IL1B,MMP3,MMP9,PDCD1LG2,PDGFB,PDGFD,PIK3C2G,PIK3R6,TNC
Adenine and Adenosine Salvage III	1.09	0.286	#NUM!	ADA,PNP
Purine Ribonucleosides Degradation to Ribose-1-phosphate	1.09	0.286	#NUM!	ADA,PNP
Glycoaminoglycan-protein Linkage Region Biosynthesis	1.09	0.286	#NUM!	B3GAT1,XYLT1
p53 Signaling	1.08	0.112	-1.265	ATM,BIRC5,BRCA1,CHEK2,KAT2B,PERP,PIDD1,PIK3C2G,PIK3R6,TIGAR,TP63
Choline Biosynthesis III	1.08	0.2	#NUM!	GPLD1,PCYT1B,PLD4
IL-22 Signaling	1.08	0.167	#NUM!	MAPK11,MAPK12,MAPK13,STAT5A
Tumoricidal Function of Hepatic Natural Killer Cells	1.08	0.167	#NUM!	CASP9,DFFA,ENDOG,PRF1
Regulation Of The Epithelial Mesenchymal Transition In Development Pathway	1.07	0.115	-1.667	BRCA1,CDH1,FZD9,GLI1,GLIS1,JAG2,LEF1,PTCH2,WNT3A,WNT8B
Gα12/13 Signaling	1.07	0.105	-1.069	BTK,CDH1,CDH17,LPAR2,LPAR3,MAPK12,MEF2B,MYL3,MYL4,PIK3C2G,PIK3R6,TBXA2R,TEC,VAV3
Gαq Signaling	1.06	0.101	-1.291	AGTR1,AVPR1A,BTK,CALCR,GNA14,GNAO1,GPLD1,GYS1,PIK3C2G,PIK3R6,PLD4,PRKCQ,PRKD1,RAC2,RHOF,RHOH,RHOV
Phagosome Formation	2.22	0.0962	-3.597	ACKR4,ADCYAP1R1,ADGRD1,ADORA2B,ADORA3,AGTR1,APBB1IP,AVPR1A,C5AR1,CALCR,CCKAR,CCR10,CLEC4D,CLEC4E,FCER1A,FCER1G,FCGR2A,FZD9,GHRHR,GLP1R,GPLD1,GPR152,GPR173,GPR35,GPR52,GPR62,GPR88,HCAR2,HRH2,HRH4,IGKC,ITGA4,ITGA6,ITGAE,ITGB2,ITGB4,ITGB8,LAT,LBP,LCAT,LGR5,LPAR2,LPAR3,LTB4R,MAPK12,MC1R,MYL3,MYL4,MYLK3,OPN1LW,P2RY10,P2RY14,PIK3C2G,PIK3R6,PLD4,PRKCQ,PRKD1,PTAFR,RAC2,RRH,RXFP4,S1PR4,TBXA2R,Tlr12,TLR9,V…
Nicotine Degradation III	1.05	0.127	-1.134	Aox2,Aox3,Aox4,CYP2B6,UGT1A4,UGT1A6,Ugt1a7c
eNOS Signaling	1.05	0.101	-0.277	ADCY1,ADCY3,ADCY8,AQP5,AQP9,CASP9,CHRNB2,FLT4,HSPA1L,LPAR2,LPAR3,PIK3C2G,PIK3R6,PRKAA2,PRKCQ,PRKD1
TREM1 Signaling	1.04	0.117	-1	CD86,IL1B,NLRC5,NOD2,SIGIRR,STAT5A,Tlr12,TLR9,TYROBP
LXR/RXR Activation	1.04	0.106	0.277	AHSG,ALB,APOA2,APOC4,C4A/C4B,IL1B,IL1RL2,ITIH4,LBP,LCAT,MMP9,NR1H4,SERPINF1
Coronavirus Replication Pathway	1.03	0.133	-0.816	TMPRSS2,TUBA4A,TUBA8,TUBB2B,TUBB3,TUBB4A
Superpathway of Inositol Phosphate Compounds	1.03	0.0948	0.471	CDC25C,ENTPD6,EPHX2,EYA4,FIG4,INPP5E,ITPKA,NUDT15,PIK3C2G,PIK3R6,PLCD4,PPFIA2,PPM1H,PPM1J,PPP1R3C,PPP2R2C,PTPN13,PTPN2,PXYLP1,SGPP2,SSH3,THTPA
Mismatch Repair in Eukaryotes	1.01	0.188	#NUM!	POLD1,RFC3,RFC5
Insulin Secretion Signaling Pathway	1	0.0923	-1.091	ADCY1,ADCY3,ADCY8,CACNA1A,CACNA2D4,CACNB1,CCKAR,GLP1R,GNA14,KCNJ8,MAFA,MAPK11,MAPK12,MAPK13,NALCN,PCSK2,PIK3C2G,PIK3R6,PLCD4,PRKCQ,PRKD1,RYR1,SEC61G,STAT5A,STX1A
Neurovascular Coupling Signaling Pathway	0.991	0.0946	-0.655	ADORA2B,CACNA1A,CACNA2D4,CACNB1,DAGLA,ENTPD1,ENTPD6,GABRA4,GAST,GRIA2,GRIN2C,KCNJ12,KCNJ2,KCNJ8,KCNN3,KCNN4,LCAT,P2RX1,RYR1,SLCO2A1,TBXA2R
RAC Signaling	0.991	0.102	-1.134	ANK1,CDK5R1,CYFIP2,ITGA4,ITGA6,ITGAE,ITGB2,ITGB4,ITGB8,NCF2,NOX1,PIK3C2G,PIK3R6,RAC2
Dopamine Receptor Signaling	0.991	0.114	0	ADCY1,ADCY3,ADCY8,IL4I1,NCS1,PCBD1,PPM1J,PPP1R3C,PPP2R2C
Histidine Degradation III	0.983	0.25	#NUM!	MTHFD1L,MTHFD2L
LPS/IL-1 Mediated Inhibition of RXR Function	0.975	0.0927	0.905	ABCC2,ALDH3A1,APOC4,CHST1,CPT1B,CPT2,CRAT,CYP2B6,Cyp2c23,FMO4,Fmo6,GAL3ST2,GSTA5,HS3ST3B1,IL1B,IL1RL2,IL4I1,LBP,NR1H4,PPARGC1B,SCARB1,SLC10A1,Sult1d1
Erythropoietin Signaling Pathway	0.975	0.0977	1.698	CNTF,CSF2RB,HBA1/HBA2,HBB,IL11,IL12B,IL1B,Il31,LIF,LTB,PIK3C2G,PIK3R6,PRKCQ,PRKD1,RAC2,STAT5A,TNFSF8
IL-17A Signaling in Gastric Cells	0.975	0.154	#NUM!	CCL5,MAPK11,MAPK12,MAPK13
Apelin Liver Signaling Pathway	0.975	0.154	0	COL2A1,COL5A3,EDN3,MAPK12
Role of Tissue Factor in Cancer	0.959	0.104	#NUM!	ARRB2,FGF5,GNA14,IL1B,ITGA6,MAPK11,MAPK12,MAPK13,PIK3C2G,PIK3R6,RPS6KA2,STAT5A
iNOS Signaling	0.959	0.128	#NUM!	HMGA1,IRAK4,LBP,MAPK11,MAPK12,MAPK13
Ephrin A Signaling	0.959	0.128	#NUM!	EFNA3,EFNA5,EPHA4,PIK3C2G,PIK3R6,VAV3
MSP-RON Signaling Pathway	0.955	0.121	#NUM!	ACTG2,CSF2RB,IL12B,ITGB2,PIK3C2G,PIK3R6,RPS6KA2
Xenobiotic Metabolism Signaling	0.955	0.0906	#NUM!	ABCC2,ALDH3A1,CHST1,CYP2B6,FMO4,Fmo6,GAL3ST2,GSTA5,HS3ST3B1,IL1B,IL4I1,MAP3K13,MAP3K4,MAPK11,MAPK12,MAPK13,PIK3C2G,PIK3R6,PPM1J,PPP2R2C,PRKCQ,PRKD1,Sult1d1,UGT1A4,UGT1A6,Ugt1a7c
Actin Nucleation by ARP-WASP Complex	0.951	0.109	-1	ITGA4,ITGA6,ITGAE,ITGB2,ITGB4,ITGB8,RAC2,RHOF,RHOH,RHOV
PD-1, PD-L1 cancer immunotherapy pathway	0.943	0.106	1.667	CD274,HLA-A,IL12B,IL2RG,LAT,PDCD1LG2,PIK3C2G,PIK3R6,PRKCQ,STAT5A,ZBTB12
Pregnenolone Biosynthesis	0.928	0.148	#NUM!	CYP11A1,CYP2B6,CYP46A1,MICAL2
3-phosphoinositide Degradation	0.917	0.0947	0.535	CDC25C,ENTPD6,EPHX2,EYA4,FIG4,INPP5E,NUDT15,PPFIA2,PPM1H,PPM1J,PPP1R3C,PPP2R2C,PTPN13,PTPN2,PXYLP1,SGPP2,SSH3,THTPA
D-myo-inositol (1,4,5,6)-Tetrakisphosphate Biosynthesis	0.91	0.0955	0.277	CDC25C,ENTPD6,EPHX2,EYA4,FIG4,NUDT15,PPFIA2,PPM1H,PPM1J,PPP1R3C,PPP2R2C,PTPN13,PTPN2,PXYLP1,SGPP2,SSH3,THTPA
D-myo-inositol (3,4,5,6)-tetrakisphosphate Biosynthesis	0.91	0.0955	0.277	CDC25C,ENTPD6,EPHX2,EYA4,FIG4,NUDT15,PPFIA2,PPM1H,PPM1J,PPP1R3C,PPP2R2C,PTPN13,PTPN2,PXYLP1,SGPP2,SSH3,THTPA
Opioid Signaling Pathway	0.91	0.0899	0	ADCY1,ADCY3,ADCY8,ARRB2,CACNA1A,CACNA2D4,CACNB1,GNA14,GNAO1,GRIN2C,GRK3,LEF1,MAPK12,PDE1A,PDK1,PIK3C2G,PRKCQ,PRKD1,RAC2,RGS1,RGS5,RPS6KA2,RYR1,SLC12A5,SRF
Cholecystokinin/Gastrin-mediated Signaling	0.9	0.102	-0.905	EPHA4,GAST,IL1B,MAPK12,MEF2B,PRKCQ,PRKD1,RAC2,RHOF,RHOH,RHOV,SRF
GPCR-Mediated Nutrient Sensing in Enteroendocrine Cells	0.9	0.102	-1.155	ADCY1,ADCY3,ADCY8,CACNA1A,CACNA2D4,CACNB1,GAST,GNA14,GPBAR1,PLCD4,PRKCQ,PRKD1
Xenobiotic Metabolism General Signaling Pathway	0.9	0.0986	-1.941	GSTA5,MAP3K13,MAP3K4,MAPK11,MAPK12,MAPK13,NR1H4,PIK3C2G,PIK3R6,PRKCQ,PRKD1,UGT1A4,UGT1A6,Ugt1a7c
GADD45 Signaling	0.896	0.117	-0.378	ATM,BRCA1,IL1B,MAP3K4,MAPK11,MAPK12,MAPK13
Pathogenesis of Multiple Sclerosis	0.893	0.222	#NUM!	CCL4,CCL5
3-phosphoinositide Biosynthesis	0.893	0.0931	0.258	CDC25C,ENTPD6,EPHX2,EYA4,FIG4,NUDT15,PIK3C2G,PIK3R6,PPFIA2,PPM1H,PPM1J,PPP1R3C,PPP2R2C,PTPN13,PTPN2,PXYLP1,SGPP2,SSH3,THTPA
Ketolysis	0.893	0.222	#NUM!	BDH1,Oxct2a/Oxct2b
Histidine Degradation VI	0.886	0.143	#NUM!	CYP11A1,CYP2B6,CYP46A1,MICAL2
Glioma Invasiveness Signaling	0.879	0.111	-1.134	MMP9,PIK3C2G,PIK3R6,RAC2,RHOF,RHOH,RHOV,TIMP1
Asparagine Degradation I	0.866	0.5	#NUM!	ASPG
Dolichol and Dolichyl Phosphate Biosynthesis	0.866	0.5	#NUM!	DHDDS
Spermine Biosynthesis	0.866	0.5	#NUM!	SMS
L-cysteine Degradation III	0.866	0.5	#NUM!	GOT1
GDP-L-fucose Biosynthesis II (from L-fucose)	0.866	0.5	#NUM!	FCSK
Xanthine and Xanthosine Salvage	0.866	0.5	#NUM!	PNP
L-glutamine Biosynthesis II (tRNA-dependent)	0.866	0.5	#NUM!	QRSL1
Fatty Acid Biosynthesis Initiation II	0.866	0.5	#NUM!	OXSM
Cysteine Biosynthesis/Homocysteine Degradation	0.866	0.5	#NUM!	CBS/CBSL
Putrescine Biosynthesis III	0.866	0.5	#NUM!	AZIN2
Glycine Biosynthesis I	0.866	0.5	#NUM!	SHMT1
Neuroprotective Role of THOP1 in Alzheimer's Disease	0.86	0.1	0	CTRL,ECE2,GNRH1,HLA-A,MMP9,PRSS12,Prss30,PRSS41,PRSS57,SERPINA3,ST14,TMPRSS2
D-myo-inositol-5-phosphate Metabolism	0.857	0.0928	0	CDC25C,ENTPD6,EPHX2,EYA4,FIG4,NUDT15,PLCD4,PPFIA2,PPM1H,PPM1J,PPP1R3C,PPP2R2C,PTPN13,PTPN2,PXYLP1,SGPP2,SSH3,THTPA
Colorectal Cancer Metastasis Signaling	0.851	0.0889	-1.789	ADCY1,ADCY3,ADCY8,BIRC5,CASP9,CDH1,FZD9,GNA14,GNAO1,GRK3,LEF1,MAPK12,MMP3,MMP9,PIK3C2G,PIK3R6,RAC2,RHOF,RHOH,RHOV,Tlr12,TLR9,WNT3A,WNT8B
LPS-stimulated MAPK Signaling	0.848	0.106	-0.378	LBP,MAPK11,MAPK12,MAPK13,PIK3C2G,PIK3R6,PRKCQ,PRKD1,SRF
Purine Nucleotides Degradation II (Aerobic)	0.839	0.158	#NUM!	ADA,GDA,PNP
Dopamine-DARPP32 Feedback in cAMP Signaling	0.836	0.0929	-0.905	ADCY1,ADCY3,ADCY8,ATP2A1,CACNA1A,CACNA2D4,CACNB1,GRIN2C,KCNJ12,KCNJ2,KCNJ8,PLCD4,PPM1J,PPP1R3C,PPP2R2C,PRKCQ,PRKD1
UVC-Induced MAPK Signaling	0.833	0.118	-1.342	MAPK11,MAPK12,MAPK13,PRKCQ,PRKD1,SMPD4
UVA-Induced MAPK Signaling	0.824	0.102	-1	ATM,CASP9,MAPK11,MAPK12,MAPK13,PIK3C2G,PIK3R6,PLCD4,RPS6KA2,SMPD4
FGF Signaling	0.824	0.105	-0.707	FGF11,FGF5,FGF9,HGF,MAPK11,MAPK12,MAPK13,PIK3C2G,PIK3R6
Dolichyl-diphosphooligosaccharide Biosynthesis	0.815	0.2	#NUM!	ALG8,DPM3
G-Protein Coupled Receptor Signaling	2.21	0.0959	-2.077	ACKR4,ADCY1,ADCY3,ADCY8,ADCYAP1R1,ADGRD1,ADORA2B,ADORA3,AGTR1,ARRB2,AVPR1A,C5AR1,CALCR,CCKAR,CCR10,FOXO6,FZD9,GDPD1,GHRHR,GLP1R,GNA14,GNAO1,GPR152,GPR173,GPR35,GPR52,GPR62,GPR88,GRK3,HCAR2,HCN1,HCN3,HRH2,HRH4,KCNN3,KCNN4,LGR5,LPAR2,LPAR3,LTB4R,MAP3K13,MAP3K4,MAPK11,MAPK12,MAPK13,MC1R,MEF2B,MYL3,MYL4,MYLK3,OPN1LW,P2RY10,P2RY14,PDE1A,PDE6B,PDE7A,PIK3C2G,PIK3R6,PTAFR,RAC2,RRH,RXFP4,S1PR4,SIX1,SRF,SY…
GPCR-Mediated Integration of Enteroendocrine Signaling Exemplified by an L Cell	0.807	0.107	-0.378	ADCY1,ADCY3,ADCY8,CCKAR,GLP1R,GNA14,NMB,PLCD4
Ubiquinol-10 Biosynthesis (Eukaryotic)	0.804	0.133	#NUM!	CYP11A1,CYP2B6,CYP46A1,MICAL2
Cellular Effects of Sildenafil (Viagra)	0.801	0.0946	#NUM!	ACTG2,ADCY1,ADCY3,ADCY8,CACNA1A,CACNA2D4,CACNB1,KCNN3,KCNN4,MYL3,MYL4,NPPA,PDE1A,PLCD4
Gap Junction Signaling	0.801	0.0909	#NUM!	ACTG2,ADCY1,ADCY3,ADCY8,CCN3,GAST,GJA4,GRIA2,PIK3C2G,PIK3R6,PLCD4,PRKCQ,PRKD1,TUBA4A,TUBA8,TUBB2B,TUBB3,TUBB4A
Differential Regulation of Cytokine Production in Macrophages and T Helper Cells by IL-17A and IL-17F	2.17	0.278	-2.236	CCL4,CCL5,CSF3,IL12B,IL1B
Role of Macrophages, Fibroblasts and Endothelial Cells in Rheumatoid Arthritis	0.79	0.0856	#NUM!	APC2,C5,C5AR1,CCL5,DKK1,FRZB,FZD9,GNAO1,IGKC,IL1B,IL1RL2,IRAK4,LEF1,LTB,MMP3,PDGFB,PDGFD,PIK3C2G,PIK3R6,PLCD4,PRKCQ,PRKD1,SOCS1,Tlr12,TLR9,TRAF4,WNT3A,WNT8B
Pulmonary Healing Signaling Pathway	0.788	0.0905	-1.886	CDC25C,CDH1,FOXM1,FZD9,LEF1,MAPK11,MAPK12,MAPK13,MMP3,MMP9,NOTCH3,PRKAA2,PRKCQ,PRKD1,SMAD9,STAT5A,WNT3A,WNT8B
PI3K/AKT Signaling	0.788	0.0905	0	CSF2RB,GYS1,IL13RA2,IL17RE,IL1RL2,IL21R,IL27RA,IL2RG,IL31RA,IL5RA,ITGA4,ITGA6,ITGAE,ITGB2,ITGB4,ITGB8,PPM1J,PPP2R2C
Neuroinflammation Signaling Pathway	0.78	0.0857	-1.091	BIRC5,CCL5,CD200,CD86,CNTF,GABRA4,GRIN2C,HLA-A,IL12B,IL1B,IRAK4,MAPK11,MAPK12,MAPK13,MMP3,MMP9,NCF2,NOX1,PIK3C2G,PIK3R6,RAC2,SLC6A13,SNCA,Tlr12,TLR9,TYROBP,ZBTB12
Triacylglycerol Biosynthesis	1.75	0.167	-2.646	ASPG,DGAT2L6,GPAT3,LPCAT1,LPCAT2,LPCAT3,MBOAT1,PORCN
Sperm Motility	0.775	0.0876	1.414	BTK,EPHA4,ERBB3,FES,FLT4,GNA14,GNAO1,ITK,KIT,LCAT,LMTK3,NPPA,NPPC,PDE1A,PLCD4,PRKCQ,PRKD1,PTK6,SRMS,STYK1,TEC,TNK2
Mineralocorticoid Biosynthesis	0.75	0.182	#NUM!	GSTA5,HSD3B1
Sumoylation Pathway	0.745	0.098	0.333	CDH1,MAPK12,PIAS4,RAC2,RFC3,RFC5,RHOF,RHOH,RHOV,SNCA
RAR Activation	0.735	0.0887	#NUM!	ADCY1,ADCY3,ADCY8,Akr1c14,BRD7,CSF2RB,GTF2H3,KAT2B,LRAT,MAPK11,MAPK12,MAPK13,NRIP2,PRKCQ,PRKD1,RDH10,SMAD9,STAT5A
Tight Junction Signaling	0.728	0.0899	#NUM!	ACTG2,CGN,CLDN1,CLDN12,CLDN24,CLDN4,CLDN8,CSTF1,IGSF5,MYL3,MYL4,OCLN,PATJ,PPM1J,PPP2R2C,STX1A
EGF Signaling	0.726	0.109	-0.447	MAPK11,MAPK12,MAPK13,PIK3C2G,PIK3R6,SRF
Differential Regulation of Cytokine Production in Intestinal Epithelial Cells by IL-17A and IL-17F	1.7	0.217	-2.236	CCL4,CCL5,CSF3,IL12B,IL1B
L-carnitine Biosynthesis	0.708	0.333	#NUM!	BBOX1
Uracil Degradation II (Reductive)	0.708	0.333	#NUM!	UPB1
Guanine and Guanosine Salvage I	0.708	0.333	#NUM!	PNP
5-aminoimidazole Ribonucleotide Biosynthesis I	0.708	0.333	#NUM!	PFAS
1,25-dihydroxyvitamin D3 Biosynthesis	0.708	0.333	#NUM!	CYP27B1
Palmitate Biosynthesis I (Animals)	0.708	0.333	#NUM!	OXSM
Thymine Degradation	0.708	0.333	#NUM!	UPB1
Geranylgeranyldiphosphate Biosynthesis	0.708	0.333	#NUM!	COX10
Adenine and Adenosine Salvage I	0.708	0.333	#NUM!	PNP
Glutamate Degradation II	0.708	0.333	#NUM!	GOT1
Tyrosine Biosynthesis IV	0.708	0.333	#NUM!	PCBD1
L-serine Degradation	0.708	0.333	#NUM!	SDSL
Aspartate Biosynthesis	0.708	0.333	#NUM!	GOT1
Oleate Biosynthesis II (Animals)	0.688	0.167	#NUM!	PTPRT,Scd4
Glucocorticoid Biosynthesis	0.688	0.167	#NUM!	GSTA5,HSD3B1
Systemic Lupus Erythematosus In T Cell Signaling Pathway	0	0.0335	-2.236	CASP9,CASQ1,CD86,FCER1G,H2-T24,HLA-A,ICOS,IL12B,LAT,PDK1,PIK3C2G,PIK3R6,PPM1J,PPP2R2C,RAC2,RHOF,RHOH,RHOV,RORC,SELPLG,Trbc1
ERBB Signaling	0.686	0.0968	-0.707	ERBB3,MAPK11,MAPK12,MAPK13,NRG4,PIK3C2G,PIK3R6,PRKCQ,PRKD1
Serotonin Receptor Signaling	0.684	0.111	#NUM!	ADCY1,ADCY3,ADCY8,IL4I1,PCBD1
Agrin Interactions at Neuromuscular Junction	0.678	0.101	-0.378	ACTG2,ERBB3,ITGA4,MAPK12,Nrg1,NRG4,RAC2
Role of IL-17A in Arthritis	0.678	0.105	#NUM!	CCL5,MAPK11,MAPK12,MAPK13,PIK3C2G,PIK3R6
Role of JAK1 and JAK3 in γc Cytokine Signaling	0.678	0.101	#NUM!	FES,IL21R,IL2RG,PIK3C2G,PIK3R6,SOCS1,STAT5A
Chondroitin Sulfate Biosynthesis	0.678	0.105	-0.816	B3GAT1,CHST1,GAL3ST2,HS3ST3B1,Sult1d1,XYLT1
Pyrimidine Ribonucleotides Interconversion	0.67	0.118	0	ENTPD1,ENTPD6,NME3,NUDT15
Fcγ Receptor-mediated Phagocytosis in Macrophages and Monocytes	0.668	0.0957	-0.333	ACTG2,FCGR2A,GPLD1,PIK3C2G,PLD4,PRKCQ,PRKD1,RAC2,VAV3
Glioblastoma Multiforme Signaling	0.666	0.0882	-1.941	APC2,FZD9,IGF2,LEF1,PDGFB,PDGFD,PIK3C2G,PIK3R6,PLCD4,RAC2,RHOF,RHOH,RHOV,WNT3A,WNT8B
cAMP-mediated signaling	0.662	0.0851	-0.688	ADCY1,ADCY3,ADCY8,ADORA2B,ADORA3,AGTR1,AKAP6,GDPD1,GLP1R,GNAO1,HCAR2,HRH2,LTB4R,MC1R,P2RY14,PDE1A,PDE6B,PDE7A,RXFP4,TBXA2R
IL-23 Signaling Pathway	0.658	0.109	-1.342	IL12B,IL1B,PIK3C2G,PIK3R6,RORC
SNARE Signaling Pathway	0.648	0.0902	-0.577	ADCY1,ADCY3,ADCY8,CACNB1,CPLX2,MYL3,MYL4,SNCA,STX1A,STXBP6,SYT15,SYT9
GABA Receptor Signaling	0.648	0.0902	#NUM!	ADCY1,ADCY3,ADCY8,CACNA1A,CACNA2D4,CACNB1,GABRA4,GNA14,GNAO1,KCNN3,KCNN4,SLC6A13
IL-9 Signaling	0.638	0.114	0	IL2RG,PIK3C2G,PIK3R6,STAT5A
γ-glutamyl Cycle	0.636	0.154	#NUM!	CHAC1,GGT5
Guanosine Nucleotides Degradation III	0.636	0.154	#NUM!	GDA,PNP
IL-1 Signaling	0.633	0.0938	#NUM!	ADCY1,ADCY3,ADCY8,GNA14,GNAO1,IRAK4,MAPK11,MAPK12,MAPK13
Dermatan Sulfate Biosynthesis	0.633	0.102	-0.816	B3GAT1,CHST1,GAL3ST2,HS3ST3B1,Sult1d1,XYLT1
Cysteine Biosynthesis III (mammalia)	0.627	0.125	#NUM!	AHCY,AHCYL2,CBS/CBSL
WNT/β-catenin Signaling	0.627	0.0867	-0.277	APC2,CDH1,DKK1,FRAT1,FRZB,FZD9,GNAO1,LEF1,POU5F1,PPM1J,PPP2R2C,SOX11,SOX9,WNT3A,WNT8B
PEDF Signaling	0.625	0.0952	-0.378	DOCK3,MAPK11,MAPK12,MAPK13,PIK3C2G,PIK3R6,SERPINF1,SRF
HER-2 Signaling in Breast Cancer	0.618	0.0841	-0.943	BCL2L11,BIRC5,CASP9,COX10,COX7A1,ELF3,ERBB3,FCER1A,FCER1G,ITGB2,ITGB4,ITGB8,NUP155,PDK1,PGR,PIK3C2G,PIK3R6,PRKCQ,PRKD1
IL-10 Signaling	0.616	0.0972	#NUM!	FCGR2A,IL1B,IL1RL2,LBP,MAPK11,MAPK12,MAPK13
Netrin Signaling	0.616	0.0972	-1.89	ABLIM2,CACNA1A,CACNA2D4,CACNB1,RAC2,RYR1,UNC5B
Signaling by Rho Family GTPases	0.613	0.0827	-1.604	ACTG2,CDH1,CDH17,GNA14,GNAO1,ITGA4,ITGA6,ITGAE,ITGB2,ITGB4,ITGB8,MAPK12,MYL3,MYL4,NCF2,NOX1,PIK3C2G,PIK3R6,RAC2,RHOF,RHOH,RHOV
Semaphorin Signaling in Neurons	0.611	0.1	#NUM!	FES,RAC2,RHOF,RHOH,RHOV,SEMA7A
Endometrial Cancer Signaling	0.611	0.1	0	APC2,CASP9,CDH1,LEF1,PIK3C2G,PIK3R6
CDP-diacylglycerol Biosynthesis I	1.56	0.2	-2.236	GPAT3,LPCAT1,LPCAT2,LPCAT3,MBOAT1
Pyrimidine Ribonucleotides De Novo Biosynthesis	0.611	0.111	0	ENTPD1,ENTPD6,NME3,NUDT15
Glutathione-mediated Detoxification	0.611	0.111	#NUM!	GSTA5,NAT8,NAT8B,Nat8f3 (includes others)
PCP (Planar Cell Polarity) Pathway	0.611	0.1	-1.633	CTHRC1,FZD9,MAPK12,PFN4,WNT3A,WNT8B
Kinetochore Metaphase Signaling Pathway	0.611	0.0909	0.707	BIRC5,CDC20,CENPE,CENPU,DNAH10,KNTC1,NSL1,PPP1R3C,SKA3,STAG3
FcγRIIB Signaling in B Lymphocytes	0.607	0.0941	-0.447	BTK,CACNA1A,CACNA2D4,CACNB1,CD79A,MAPK12,PIK3C2G,PIK3R6
nNOS Signaling in Skeletal Muscle Cells	0.607	0.104	#NUM!	CACNA1A,CACNA2D4,CACNB1,RYR1,SNTB1
IL-12 Signaling and Production in Macrophages	0.606	0.0882	#NUM!	ALB,APOA2,APOC4,IL12B,MAPK11,MAPK12,MAPK13,PIK3C2G,PIK3R6,PRKCQ,PRKD1,SPI1
Semaphorin Neuronal Repulsive Signaling Pathway	0.604	0.0872	-0.302	FES,ITGA4,ITGA6,ITGAE,ITGB2,ITGB4,ITGB8,MYL3,MYL4,NCAN,PIK3C2G,PIK3R6,SEMA6B
Catecholamine Biosynthesis	0.597	0.25	#NUM!	DBH
Proline Biosynthesis I	0.597	0.25	#NUM!	PYCR1
Melatonin Degradation II	0.597	0.25	#NUM!	IL4I1
L-cysteine Degradation I	0.597	0.25	#NUM!	GOT1
Phenylalanine Degradation I (Aerobic)	0.597	0.25	#NUM!	PCBD1
Antioxidant Action of Vitamin C	0.595	0.0901	0.707	CSF2RB,GPLD1,LCAT,MAPK11,MAPK12,MAPK13,PLCD4,PLD4,SLC23A1,STAT5A
Ephrin Receptor Signaling	0.593	0.0842	0.378	EFNA3,EFNA5,EPHA4,GNA14,GNAO1,GRIN2C,ITGA4,ITGA6,ITGAE,ITGB2,ITGB4,ITGB8,PDGFB,PDGFD,PIK3C2G,PTPN13,RAC2
Prolactin Signaling	0.59	0.093	0.816	KCNU1,NMI,PIK3C2G,PIK3R6,PRKCQ,PRKD1,SOCS1,STAT5A
Phenylalanine Degradation IV (Mammalian, via Side Chain)	0.588	0.143	#NUM!	GOT1,IL4I1
ATM Signaling	0.585	0.0909	-0.707	ATM,BRCA1,CDC25C,CHEK2,MAPK11,MAPK12,MAPK13,PPM1J,PPP2R2C
Superpathway of Methionine Degradation	0.583	0.108	-1	AHCY,AHCYL2,CBS/CBSL,GOT1
Gustation Pathway	0.582	0.0837	-0.728	ADCY1,ADCY3,ADCY8,CACNA1A,CACNA2D4,CACNB1,GABRA4,GLP1R,KCNJ12,KCNJ8,KCNN3,KCNN4,LIPH,LRRC8B,P2RX1,P2RY10,P2RY14
Gαs Signaling	0.578	0.088	-1	ADCY1,ADCY3,ADCY8,ADORA2B,GLP1R,GNA14,GNAO1,HCAR2,HRH2,MC1R,RYR1
Gluconeogenesis I	0.561	0.115	#NUM!	ENO1,FBP2,ME3
Inhibition of Matrix Metalloproteases	0.558	0.105	#NUM!	MMP3,MMP9,SDC1,TIMP1
Neuropathic Pain Signaling In Dorsal Horn Neurons	0.554	0.0891	-1	GRIA2,GRIN2C,KCNN3,KCNN4,PIK3C2G,PIK3R6,PLCD4,PRKCQ,PRKD1
Gαi Signaling	0.553	0.0857	0	ADCY1,ADCY3,ADCY8,ADORA3,AGTR1,GNA14,GNAO1,HCAR2,LTB4R,P2RY14,RXFP4,TBXA2R
Superpathway of Melatonin Degradation	0.551	0.0952	-1.633	CYP2B6,IL4I1,Sult1d1,UGT1A4,UGT1A6,Ugt1a7c
Endocannabinoid Developing Neuron Pathway	0.551	0.0866	-0.632	ADCY1,ADCY3,ADCY8,BRCA1,GNAO1,MAPK11,MAPK12,MAPK13,PIK3C2G,PIK3R6,RAC2
Clathrin-mediated Endocytosis Signaling	0.548	0.0829	#NUM!	ACTG2,ALB,APOA2,APOC4,ARRB2,FGF11,FGF5,FGF9,HIP1R,ITGB2,ITGB4,ITGB8,PDGFB,PDGFD,PIK3C2G,PIK3R6
Leukotriene Biosynthesis	0.545	0.133	#NUM!	DPEP3,GGT5
Regulation of Cellular Mechanics by Calpain Protease	0.541	0.0899	#NUM!	ACTN2,CAPN5,ITGA4,ITGA6,ITGAE,ITGB2,ITGB4,ITGB8
Amyloid Processing	0.541	0.098	#NUM!	CAPN5,CDK5R1,MAPK11,MAPK12,MAPK13
Apelin Endothelial Signaling Pathway	0.541	0.0851	-0.302	ADCY1,ADCY3,ADCY8,GNA14,GNAO1,MAPK12,MEF2B,PIK3C2G,PIK3R6,PRKAA2,PRKCQ,PRKD1
Amyotrophic Lateral Sclerosis Signaling	0.539	0.087	-0.816	CACNA1A,CACNA2D4,CACNB1,CAPN5,CASP9,GRIA2,GRIN2C,PIK3C2G,PIK3R6,PRPH
IL-6 Signaling	0.539	0.0859	-0.333	IL1B,IL1RL2,LBP,MAPK11,MAPK12,MAPK13,PIK3C2G,PIK3R6,SOCS1,SRF,TNFAIP6
tRNA Charging	0.533	0.103	0	AARS2,KARS1,PARS2,TARS3
Relaxin Signaling	0.53	0.0839	-0.816	ADCY1,ADCY3,ADCY8,GAST,GDPD1,GNA14,GNAO1,MMP9,PDE1A,PDE6B,PDE7A,PIK3C2G,PIK3R6
NER (Nucleotide Excision Repair, Enhanced Pathway)	0.524	0.0874	-1.667	CHAF1B,ERCC8,GTF2H3,POLD1,POLE,POLE2,POLK,RFC3,RFC5
Arsenate Detoxification I (Glutaredoxin)	0.516	0.2	#NUM!	PNP
Proline Biosynthesis II (from Arginine)	0.516	0.2	#NUM!	PYCR1
Lysine Degradation V	0.516	0.2	#NUM!	PIPOX
Trans, trans-farnesyl Diphosphate Biosynthesis	0.516	0.2	#NUM!	Idi2
Rapoport-Luebering Glycolytic Shunt	0.516	0.2	#NUM!	TIGAR
dTMP De Novo Biosynthesis	0.516	0.2	#NUM!	SHMT1
ERB2-ERBB3 Signaling	0.514	0.0923	0.816	ERBB3,Nrg1,NRG4,PIK3C2G,PIK3R6,STAT5A
Pyroptosis Signaling Pathway	0.686	0.0968	-2.333	CASP9,GBP3,GBP5,IL1B,MAPK11,MAPK12,MAPK13,Tlr12,TLR9
Maturity Onset Diabetes of Young (MODY) Signaling	0.511	0.0897	#NUM!	APOA2,APOC4,APOL2,CACNA1A,CACNA2D4,CACNB1,KCNJ8
Adenosine Nucleotides Degradation II	0.506	0.125	#NUM!	ADA,PNP
Nitric Oxide Signaling in the Cardiovascular System	0.499	0.0847	0.707	ATP2A1,CACNA1A,CACNA2D4,CACNB1,FLT4,PDE1A,PIK3C2G,PIK3R6,PRKCQ,PRKD1
Chemokine Signaling	0.495	0.0886	-1.633	CCL4,CCL5,MAPK11,MAPK12,MAPK13,NOX1,PIK3C2G
Acute Phase Response Signaling	0.493	0.0811	-0.378	AHSG,ALB,APOA2,C4A/C4B,C5,IL1B,ITIH4,LBP,MAPK11,MAPK12,MAPK13,Saa3,SERPINA3,SERPINF1,SOCS1
p70S6K Signaling	0.489	0.0833	-0.302	AGTR1,BTK,CD79A,IL2RG,PIK3C2G,PIK3R6,PLCD4,PPM1J,PPP2R2C,PRKCQ,PRKD1
CDC42 Signaling	0	0.0321	-2.333	APC2,FCER1G,H2-T24,HLA-A,ITGA4,ITGA6,ITGAE,ITGB2,ITGB4,ITGB8,ITK,MAPK11,MAPK12,MAPK13,MYL3,MYL4,TNK2,Trbc1
Phagosome Maturation	0.485	0.0818	#NUM!	ATP6V1C2,HLA-A,NCF2,NOX1,RAC2,STX1A,TUBA4A,TUBA8,TUBB2B,TUBB3,TUBB4A,TUBD1,ZBTB12
RHOGDI Signaling	0.483	0.0798	1	ACTG2,CDH1,CDH17,GNA14,GNAO1,ITGA4,ITGA6,ITGAE,ITGB2,ITGB4,ITGB8,MYL3,MYL4,RAC2,RHOF,RHOH,RHOV
Role of BRCA1 in DNA Damage Response	0.48	0.0875	-1	ATM,BRCA1,BRD7,CHEK2,FANCA,RFC3,RFC5
CD40 Signaling	0.48	0.0896	-0.447	MAPK11,MAPK12,MAPK13,PIK3C2G,PIK3R6,TNFAIP3
ID1 Signaling Pathway	0.478	0.08	0	BIRC5,CDC20,CHRNB2,IGF2,KIF11,LIF,MAPK11,MAPK12,MAPK13,MCAM,MMP9,PIK3C2G,PIK3R6,POU5F1,S100A9,SMAD9
Dopamine Degradation	0.476	0.103	#NUM!	ALDH3A1,IL4I1,Sult1d1
p38 MAPK Signaling	0.474	0.0833	-1.414	IL1B,IL1RL2,IRAK4,MAPK11,MAPK12,MAPK13,MAPKAPK3,MEF2B,RPS6KA2,SRF
1D-myo-inositol Hexakisphosphate Biosynthesis II (Mammalian)	0.471	0.118	#NUM!	INPP5E,ITPKA
D-myo-inositol (1,3,4)-trisphosphate Biosynthesis	0.471	0.118	#NUM!	INPP5E,ITPKA
Endocannabinoid Cancer Inhibition Pathway	0.47	0.0816	0	ADCY1,ADCY3,ADCY8,CASP9,CASQ1,CDH1,GNAO1,LEF1,PIK3C2G,PIK3R6,PRKAA2,SMPD4
April Mediated Signaling	0.466	0.0952	#NUM!	MAPK11,MAPK12,MAPK13,TNFRSF13B
B Cell Development	0.466	0.0952	#NUM!	CD79A,CD86,HLA-A,IGKC
FLT3 Signaling in Hematopoietic Progenitor Cells	0.465	0.0864	-0.816	MAPK11,MAPK12,MAPK13,PIK3C2G,PIK3R6,RPS6KA2,STAT5A
Lymphotoxin β Receptor Signaling	0.463	0.0909	-0.447	CASP9,LTB,PIK3C2G,PIK3R6,TRAF4
ERBB4 Signaling	0.463	0.0882	0.816	Nrg1,NRG4,PIK3C2G,PIK3R6,PRKCQ,PRKD1
Calcium Signaling	0.463	0.0791	-1.508	ATP2A1,CACNA1A,CACNA2D4,CACNB1,CASQ1,CHRNB2,GRIA2,GRIN2C,MEF2B,MYL3,MYL4,PNCK,RYR1,TNNI1,TNNT1,TNNT3,TP63
Fc Epsilon RI Signaling	1.43	0.119	-2.309	BTK,FCER1A,FCER1G,GRAP2,LAT,MAPK11,MAPK12,MAPK13,PIK3C2G,PIK3R6,PRKCQ,PRKD1,RAC2,VAV3
Arginine Degradation VI (Arginase 2 Pathway)	0.451	0.167	#NUM!	PYCR1
Glycine Cleavage Complex	0.451	0.167	#NUM!	AMT
Zymosterol Biosynthesis	0.451	0.167	#NUM!	TM7SF2
Aspartate Degradation II	0.451	0.167	#NUM!	GOT1
GDP-mannose Biosynthesis	0.451	0.167	#NUM!	MPI
Heparan Sulfate Biosynthesis	0.45	0.0854	-0.378	B3GAT1,CHST1,GAL3ST2,HS3ST3B1,PLA1A,Sult1d1,XYLT1
AMPK Signaling	0.449	0.0779	-0.905	BRD7,CHRNB2,CPT1B,CPT2,FOXO6,GNA14,GNAO1,GYS1,KAT2B,MAPK11,MAPK12,MAPK13,PIK3C2G,PIK3R6,PPM1H,PPM1J,PPP2R2C,PRKAA2,STRADA
B Cell Activating Factor Signaling	0.446	0.093	#NUM!	MAPK11,MAPK12,MAPK13,TNFRSF13B
Isoleucine Degradation I	0.439	0.111	#NUM!	EHHADH,TUBA8
Androgen Biosynthesis	0.439	0.111	#NUM!	GSTA5,HSD3B1
Superpathway of Geranylgeranyldiphosphate Biosynthesis I (via Mevalonate)	0.439	0.111	#NUM!	COX10,Idi2
GNRH Signaling	0.435	0.0785	-1.508	ADCY1,ADCY3,ADCY8,CACNA1A,CACNA2D4,CACNB1,GNA14,GNRH1,MAP3K13,MAP3K4,MAPK11,MAPK12,MAPK13,PRKCQ,PRKD1
Regulation of eIF4 and p70S6K Signaling	0.429	0.0787	0.447	ITGA4,ITGA6,ITGAE,ITGB2,ITGB4,ITGB8,MAPK11,MAPK12,MAPK13,PIK3C2G,PIK3R6,PPM1J,PPP2R2C,RPS28
Factors Promoting Cardiogenesis in Vertebrates	0.428	0.0795	-1.508	APC2,DKK1,FZD9,LEF1,MAPK12,NPPA,PLCD4,PRKCQ,PRKD1,SMAD9,WNT3A,WNT8B
BER (Base Excision Repair) Pathway	0.427	0.0909	-1	POLE,RFC3,RFC5,UNG
HIF1α Signaling	0.424	0.0777	-0.775	FLT4,HGF,HSPA1L,IGF2,LDHC,MMP3,MMP9,NCF2,NOX1,PDGFB,PIK3C2G,PIK3R6,PRKCQ,PRKD1,RAC2,RORC
Human Embryonic Stem Cell Pluripotency	0.424	0.0788	#NUM!	APC2,FZD9,GNA14,GNAO1,LEF1,PDGFB,PDGFD,PIK3C2G,PIK3R6,POU5F1,S1PR4,WNT3A,WNT8B
TR/RXR Activation	0.423	0.0833	#NUM!	ATP2A1,ENO1,PIK3C2G,PIK3R6,RAB3B,SCARB1,SLC16A3
Reelin Signaling in Neurons	0.423	0.0797	-1.134	ARHGEF28,ARHGEF37,CDK5R1,DNAH10,GRIN2C,MAPK12,PAFAH1B3,PDK1,PDK2,PIK3C2G,PIK3R6
Melanocyte Development and Pigmentation Signaling	0.416	0.0816	0	ADCY1,ADCY3,ADCY8,KIT,MC1R,PIK3C2G,PIK3R6,RPS6KA2
Wound Healing Signaling Pathway	1.11	0.0956	-2.449	CCL5,CNTF,COL15A1,COL28A1,COL2A1,COL4A3,COL5A3,COL9A3,IL11,IL12B,IL1B,IL1RL2,Il31,ITGA6,ITGB4,LAMA3,LAMB3,LIF,LTB,MAPK12,MMP9,PDGFB,PDGFD,TNFSF8
Melatonin Degradation I	0.412	0.0862	-1.342	CYP2B6,Sult1d1,UGT1A4,UGT1A6,Ugt1a7c
Mitochondrial L-carnitine Shuttle Pathway	0.409	0.105	#NUM!	CPT1B,CPT2
Fatty Acid α-oxidation	0.409	0.105	#NUM!	ALDH3A1,ALOXE3
DNA damage-induced 14-3-3σ Signaling	0.409	0.105	#NUM!	ATM,BRCA1
Type II Diabetes Mellitus Signaling	0.408	0.0784	0	CACNA1A,CACNA2D4,CACNB1,MAFA,MAPK12,PIK3C2G,PIK3R6,PRKAA2,PRKCQ,PRKD1,SMPD4,SOCS1
Melatonin Signaling	0.403	0.0833	-0.816	GNAO1,GNRH1,PLCD4,PRKCQ,PRKD1,RORC
Regulation of the Epithelial-Mesenchymal Transition Pathway	0.4	0.0769	#NUM!	CDH1,FGF11,FGF5,FGF9,FZD9,HGF,JAG2,LEF1,MMP9,NOTCH3,PDGFD,PIK3C2G,PIK3R6,WNT3A,WNT8B
Superpathway of Serine and Glycine Biosynthesis I	0.398	0.143	#NUM!	SHMT1
Phosphatidylcholine Biosynthesis I	0.398	0.143	#NUM!	PCYT1B
Glycogen Biosynthesis II (from UDP-D-Glucose)	0.398	0.143	#NUM!	GYS1
Role of Osteoblasts, Osteoclasts and Chondrocytes in Rheumatoid Arthritis	0.397	0.0762	#NUM!	APC2,CALCR,CASP9,DKK1,FRZB,FZD9,IL11,IL1B,IL1RL2,LEF1,MAPK12,MMP3,PIK3C2G,PIK3R6,SMAD9,WNT3A,WNT8B
Role of OCT4 in Mammalian Embryonic Stem Cell Pluripotency	0.39	0.087	#NUM!	BRCA1,FBXO15,HOXB1,POU5F1
Role of IL-17F in Allergic Inflammatory Airway Diseases	0.39	0.087	#NUM!	CCL4,IL11,IL1B,RPS6KA2
tRNA Splicing	0.39	0.087	0	GDPD1,PDE1A,PDE6B,PDE7A
Serotonin Degradation	0.514	0.0923	-2.449	ALDH3A1,IL4I1,Sult1d1,UGT1A4,UGT1A6,Ugt1a7c
Apelin Pancreas Signaling Pathway	0.39	0.087	0	MAPK12,PIK3C2G,PIK3R6,PRKAA2
Airway Inflammation in Asthma	0.385	0.0909	#NUM!	IL12B,MMP9,PRG2
Glutaryl-CoA Degradation	0.382	0.1	#NUM!	EHHADH,TUBA8
Putrescine Degradation III	0.382	0.1	#NUM!	ALDH3A1,IL4I1
Inflammasome pathway	0.382	0.1	#NUM!	IL1B,NOD2
nNOS Signaling in Neurons	0.374	0.0851	#NUM!	CAPN5,GRIN2C,PRKCQ,PRKD1
IL-2 Signaling	0.368	0.082	0.447	IL2RG,PIK3C2G,PIK3R6,SOCS1,STAT5A
IL-13 Signaling Pathway	0.367	0.0776	-1	ANO1,CHI3L1,IL13RA2,MAPK11,MAPK12,MAPK13,PIK3C2G,PIK3R6,SOCS1
4-1BB Signaling in T Lymphocytes	0.365	0.0882	#NUM!	MAPK11,MAPK12,MAPK13
Xenobiotic Metabolism AHR Signaling Pathway	0.254	0.0706	-2.449	ALDH3A1,GSTA5,IL1B,UGT1A4,UGT1A6,Ugt1a7c
Valine Degradation I	0.357	0.0952	#NUM!	EHHADH,TUBA8
Sphingomyelin Metabolism	0.355	0.125	#NUM!	SMPD4
Angiopoietin Signaling	0.351	0.0789	#NUM!	ANGPTL1,BIRC5,CASP9,PIK3C2G,PIK3R6,STAT5A
Leptin Signaling in Obesity	0.351	0.0789	#NUM!	ADCY1,ADCY3,ADCY8,PIK3C2G,PIK3R6,PLCD4
Role of MAPK Signaling in Inhibiting the Pathogenesis of Influenza	0.351	0.0789	-1.633	CCL5,IL1B,LCAT,MAPK11,MAPK12,MAPK13
Synaptogenesis Signaling Pathway	0.347	0.0732	0	ADCY1,ADCY3,ADCY8,CACNB1,CADM1,CDH1,CDH17,CPLX2,EFNA3,EFNA5,EPHA4,GRIA2,GRIN2C,LRRTM2,PIK3C2G,PIK3R6,SHE,SNCA,STX1A,STXBP6,SYNGAP1,SYT15,SYT9
Oxytocin In Spinal Neurons Signaling Pathway	0.346	0.0857	#NUM!	AVPR1A,GAST,KCNJ8
Regulation of IL-2 Expression in Activated and Anergic T Lymphocytes	0	0.013	-2.449	FCER1G,LAT,MAPK12,PRKCQ,Trbc1,VAV3
Thrombopoietin Signaling	0.339	0.0794	0.447	PIK3C2G,PIK3R6,PRKCQ,PRKD1,STAT5A
Role of NANOG in Mammalian Embryonic Stem Cell Pluripotency	0.337	0.0756	-1	APC2,FZD9,LIF,PIK3C2G,PIK3R6,POU5F1,SMAD9,WNT3A,WNT8B
Acute Myeloid Leukemia Signaling	0.337	0.0769	0.816	CSF2RB,KIT,LEF1,PIK3C2G,PIK3R6,SPI1,STAT5A
RANK Signaling in Osteoclasts	0.337	0.0769	-0.816	MAP3K13,MAP3K4,MAPK11,MAPK12,MAPK13,PIK3C2G,PIK3R6
Cardiomyocyte Differentiation via BMP Receptors	0.333	0.0909	#NUM!	NPPA,SMAD9
The Visual Cycle	0.333	0.0909	#NUM!	LRAT,RDH10
Superpathway of D-myo-inositol (1,4,5)-trisphosphate Metabolism	0.333	0.0909	#NUM!	INPP5E,ITPKA
Methionine Degradation I (to Homocysteine)	0.333	0.0909	#NUM!	AHCY,AHCYL2
Fatty Acid β-oxidation I	0.329	0.0833	#NUM!	Eci3,EHHADH,TUBA8
NAD Signaling Pathway	0.328	0.0743	-1.265	BST1,CD38,HGF,LDHC,PDGFB,PIK3C2G,PIK3R6,POLRMT,PRKAA2,RYR1,SLC7A5
NF-κB Activation by Viruses	0.326	0.0769	0	CD4,ITGA6,PIK3C2G,PIK3R6,PRKCQ,PRKD1
Role of Hypercytokinemia/hyperchemokinemia in the Pathogenesis of Influenza	0	0.0698	-2.449	CCL4,CCL5,IL12B,IL1B,RSAD2,TLR9
Protein Kinase A Signaling	0.322	0.072	0.218	ADCY1,ADCY3,ADCY8,AKAP6,CDC25C,DUSP18,FLNC,GDPD1,GYS1,HHAT,LEF1,MYL3,MYL4,MYLK3,PDE1A,PDE6B,PDE7A,PLCD4,PPP1R3C,PRKCQ,PRKD1,PTCH2,PTP4A1,PTPN13,PTPN2,PTPRQ,PTPRT,RYR1,TNNI1
Sphingosine and Sphingosine-1-phosphate Metabolism	0.318	0.111	#NUM!	SGPP2
Salvage Pathways of Pyrimidine Deoxyribonucleotides	0.318	0.111	#NUM!	UPP1
α-Adrenergic Signaling	0.317	0.0748	#NUM!	ADCY1,ADCY3,ADCY8,GNA14,GNAO1,GYS1,PRKCQ,PRKD1
IL-3 Signaling	0.315	0.0759	0	CSF2RB,PIK3C2G,PIK3R6,PRKCQ,PRKD1,STAT5A
Role of Lipids/Lipid Rafts in the Pathogenesis of Influenza	0.312	0.087	#NUM!	Ifnz (includes others),RSAD2
Vitamin-C Transport	0.312	0.087	#NUM!	LRRC8B,SLC23A1
PTEN Signaling	0.312	0.0733	0	BCL2L11,CASP9,FLT4,FOXO6,ITGA4,ITGA6,ITGAE,ITGB2,ITGB4,ITGB8,RAC2
Apelin Cardiac Fibroblast Signaling Pathway	0.312	0.087	#NUM!	AGTR1,PRKAA2
Role of PI3K/AKT Signaling in the Pathogenesis of Influenza	0.302	0.0758	-1	CASP9,CCL5,Ifnz (includes others),PIK3C2G,PIK3R6
Phospholipases	0.302	0.0758	0.447	GPLD1,LCAT,PLA1A,PLCD4,PLD4
Synaptic Long Term Depression	0.301	0.0722	-0.277	CACNA1A,CACNA2D4,CACNB1,GAST,GNA14,GNAO1,GRIA2,LCAT,PLCD4,PPM1J,PPP2R2C,PRKCQ,PRKD1,RYR1
Oxytocin Signaling Pathway	0.298	0.0714	-0.688	ARRB2,CACNA1A,CACNA2D4,CACNB1,CCDC51,CCL5,GAST,GNAO1,KCNJ8,MAPK11,MAPK12,MAPK13,MYL3,MYL4,NPPA,PIK3C2G,PIK3R6,PRKAA2,PRKCQ,PRKD1
IL-17A Signaling in Fibroblasts	0.296	0.0789	#NUM!	MAPK11,MAPK12,MAPK13
IL-17A Signaling in Airway Cells	0.291	0.0746	-1	MAPK11,MAPK12,MAPK13,PIK3C2G,PIK3R6
mTOR Signaling	0.29	0.0714	0.277	GPLD1,PIK3C2G,PIK3R6,PLD4,PPM1J,PPP2R2C,PRKAA2,PRKCQ,PRKD1,RAC2,RHOF,RHOH,RHOV,RPS28,RPS6KA2
Embryonic Stem Cell Differentiation into Cardiac Lineages	0.286	0.1	#NUM!	POU5F1
Calcium Transport I	0.286	0.1	#NUM!	ATP2A1
Pancreatic Adenocarcinoma Signaling	0.284	0.072	0	BIRC5,CASP9,CDKN2B,GPLD1,MAPK12,MMP9,PIK3C2G,PIK3R6,PLD4
JAK/STAT Signaling	0.283	0.0732	0.816	GAST,PIAS4,PIK3C2G,PIK3R6,SOCS1,STAT5A
Transcriptional Regulatory Network in Embryonic Stem Cells	0.274	0.0741	#NUM!	HOXB1,L1CAM,MYF5,POU5F1
Tryptophan Degradation X (Mammalian, via Tryptamine)	0.273	0.08	#NUM!	ALDH3A1,IL4I1
Hereditary Breast Cancer Signaling	0.271	0.0709	#NUM!	ATM,BRCA1,BRD7,CDC25C,CHEK2,FANCA,PIK3C2G,PIK3R6,RFC3,RFC5
Ketogenesis	0.258	0.0909	#NUM!	BDH1
Glycogen Degradation II	0.258	0.0909	#NUM!	GDPGP1
Purine Nucleotides De Novo Biosynthesis II	0.258	0.0909	#NUM!	PFAS
Role of JAK1, JAK2 and TYK2 in Interferon Signaling	0.256	0.0769	#NUM!	PTPN2,SOCS1
Glycolysis I	0.256	0.0769	#NUM!	ENO1,FBP2
Adrenomedullin signaling pathway	0.487	0.0804	-2.496	ADCY1,ADCY3,ADCY8,GAST,GNA14,IL1B,KCNN3,KCNN4,MAPK11,MAPK12,MAPK13,MYLK3,PIK3C2G,PIK3R6,PLCD4,SHE
Mechanisms of Viral Exit from Host Cells	0.253	0.0732	#NUM!	ACTG2,PRKCQ,PRKD1
Intrinsic Prothrombin Activation Pathway	0.253	0.0732	#NUM!	COL2A1,COL5A3,F13A1
CNTF Signaling	0.251	0.0714	0	CNTF,PIK3C2G,PIK3R6,RPS6KA2
Tryptophan Degradation III (Eukaryotic)	0.24	0.0741	#NUM!	EHHADH,TUBA8
Cleavage and Polyadenylation of Pre-mRNA	0.234	0.0833	#NUM!	CSTF1
Assembly of RNA Polymerase III Complex	0.234	0.0833	#NUM!	BRF1
Hematopoiesis from Multipotent Stem Cells	0.234	0.0833	#NUM!	CSF3
NAD Phosphorylation and Dephosphorylation	0.234	0.0833	#NUM!	PXYLP1
Role of p14/p19ARF in Tumor Suppression	0.225	0.0714	#NUM!	PIK3C2G,PIK3R6
Glycogen Degradation III	0.213	0.0769	#NUM!	GDPGP1
Cholesterol Biosynthesis I	0.213	0.0769	#NUM!	TM7SF2
Cholesterol Biosynthesis II (via 24,25-dihydrolanosterol)	0.213	0.0769	#NUM!	TM7SF2
Cholesterol Biosynthesis III (via Desmosterol)	0.213	0.0769	#NUM!	TM7SF2
DNA Double-Strand Break Repair by Non-Homologous End Joining	0.194	0.0714	#NUM!	ATM
Role of IL-17A in Psoriasis	0.194	0.0714	#NUM!	S100A9
Acyl-CoA Hydrolysis	0.194	0.0714	#NUM!	MBLAC2
Urate Biosynthesis/Inosine 5'-phosphate Degradation	0.194	0.0714	#NUM!	PNP
Mevalonate Pathway I	0.194	0.0714	#NUM!	Idi2
Colanic Acid Building Blocks Biosynthesis	0.194	0.0714	#NUM!	MPI
CSDE1 Signaling Pathway	0	0.0357	#NUM!	EDC3,TNC
Oxytocin In Brain Signaling Pathway	0	0.0612	0	CACNA1A,CACNA2D4,CACNB1,GNAO1,IL1B,LCAT,MEF2B,PIK3C2G,PIK3R6,PRKCQ,PRKD1,SLC12A5
CLEAR Signaling Pathway	0	0.0632	-0.943	ATP6V1C2,FLT4,HGF,MAPK11,MAPK12,MAPK13,MCOLN1,NR1H4,PDGFB,PPM1J,PPP2R2C,PRKAA2,PRKCQ,PRKD1,SESN2,Tlr12,TLR9,WDR59
Glucocorticoid Receptor Signaling	0	0.0634	#NUM!	BCL2L11,BRCA1,BRD7,CCL5,CSF2RB,DNAH10,GTF2H3,H2-T24,HLA-A,HSPA1L,Ifnz (includes others),IL13RA2,IL17RE,IL1B,IL1RL2,IL21R,IL27RA,IL2RG,IL31RA,IL5RA,KAT2B,KRT23,KRT31,MAPK11,MAPK12,MAPK13,MMP3,MMP9,NPPA,PGR,PIK3C2G,PIK3R6,PRKAA2,SCGB1A1,SLPI,STAT5A
Circadian Rhythm Signaling	0	0.0637	#NUM!	ADCY1,ADCY3,ADCY8,ADCYAP1R1,CACNA1A,CACNA2D4,CACNB1,GAST,GNA14,GRIA2,GRIN2C,PLCD4,PRKAA2,PRKCQ,PRKD1,RORC,RYR1
Synaptic Long Term Potentiation	0	0.0687	-1	ADCY1,ADCY8,GNA14,GRIA2,GRIN2C,PLCD4,PPP1R3C,PRKCQ,PRKD1
Huntington's Disease Signaling	0	0.0536	-0.302	CAPN5,CASP9,CASQ1,CDK5R1,CPLX2,GNA14,HAP1,HSPA1L,PIK3C2G,PIK3R6,PRKCQ,PRKD1,RCOR2,SNCA,STX1A
NRF2-mediated Oxidative Stress Response	0	0.0431	-1	ABCC2,ACTG2,CYP2B6,Cyp2c23,GSTA5,PIK3C2G,PIK3R6,PRKCQ,PRKD1,SCARB1
PPARα/RXRα Activation	0	0.0576	-0.333	ADCY1,ADCY3,ADCY8,APOA2,CPT1B,Cyp2c23,GNA14,IL1B,IL1RL2,PLCD4,PRKAA2
Aryl Hydrocarbon Receptor Signaling	0	0.0382	#NUM!	ALDH3A1,ATM,CHEK2,Cyp2c23,GSTA5,IL1B
Coagulation System	0	0.0286	#NUM!	F13A1
Mitochondrial Dysfunction	0	0.0414	#NUM!	CASP9,COX10,COX7A1,CPT1B,MAPK12,NDUFA1,SNCA
VDR/RXR Activation	0	0.0513	0	CCL5,CYP27B1,PRKCQ,PRKD1
Ceramide Signaling	0	0.0667	-1.342	PIK3C2G,PIK3R6,PPM1J,PPP2R2C,S1PR4,SMPD4
PXR/RXR Activation	0	0.0308	#NUM!	ABCC2,CYP2B6
Activation of IRF by Cytosolic Pattern Recognition Receptors	0	0.0154	#NUM!	MAPK12
Role of RIG1-like Receptors in Antiviral Innate Immunity	0	0.0217	#NUM!	TRIM25
Mouse Embryonic Stem Cell Pluripotency	1.21	0.115	-2.53	APC2,FZD9,LEF1,LIF,MAPK11,MAPK12,MAPK13,PIK3C2G,PIK3R6,POU5F1,SMAD9,WNT3A
MIF Regulation of Innate Immunity	0	0.0227	#NUM!	MAPK12
ICOS-ICOSL Signaling in T Helper Cells	0	0.0257	-2.53	CD4,CD86,FCER1G,GRAP2,HLA-A,ICOS,IL2RG,ITK,LAT,PIK3C2G,PIK3R6,PRKCQ,Trbc1
CCR5 Signaling in Macrophages	0	0.0301	-1.633	CACNA1A,CACNA2D4,CACNB1,CCL4,CCL5,CD4,FCER1G,GNA14,GNAO1,MAPK11,MAPK12,MAPK13,PRKCQ,PRKD1,Trbc1
Calcium-induced T Lymphocyte Apoptosis	0	0.0153	-1.342	ATP2A1,CD4,FCER1G,HLA-A,PRKCQ,PRKD1,Trbc1
Cytotoxic T Lymphocyte-mediated Apoptosis of Target Cells	0	0.0165	-1	CASP9,DFFA,FCER1G,HLA-A,PRF1,Trbc1,ZBTB12
CD27 Signaling in Lymphocytes	0	0.0702	0	CASP9,MAP3K13,MAP3K4,MAPK12
fMLP Signaling in Neutrophils	0	0.0687	-0.816	GNA14,GNAO1,NCF2,NOX1,PIK3C2G,PIK3R6,PRKCQ,PRKD1,RAC2
CTLA4 Signaling in Cytotoxic T Lymphocytes	0	0.023	#NUM!	CD86,FCER1G,GRAP2,HLA-A,LAT,PIK3C2G,PIK3R6,PPM1J,PPP2R2C,Trbc1,ZBTB12
Induction of Apoptosis by HIV1	0	0.0462	#NUM!	CASP9,DFFA,MAPK12
T Helper Cell Differentiation	0	0.0213	#NUM!	CD86,FCER1G,GATA3,HLA-A,ICOS,IL12B,IL21R,IL2RG,RORC,Trbc1
CCR3 Signaling in Eosinophils	0	0.0677	-0.816	GNA14,GNAO1,MAPK11,MAPK12,MAPK13,PIK3C2G,PIK3R6,PRKCQ,PRKD1
Oncostatin M Signaling	0	0.0698	#NUM!	CHI3L1,MMP3,STAT5A
CD28 Signaling in T Helper Cells	0	0.0233	-1.667	CD4,CD86,FCER1G,GRAP2,HLA-A,ITK,LAT,MAPK12,PIK3C2G,PIK3R6,PRKCQ,Trbc1
IL-15 Signaling	0	0.0171	-0.707	IGKC,IL2RG,IL5RA,MAPK11,MAPK12,MAPK13,PIK3C2G,PIK3R6,STAT5A
Role of Cytokines in Mediating Communication between Immune Cells	0	0.0556	#NUM!	CSF3,IL12B,IL1B
Phosphatidylglycerol Biosynthesis II (Non-plastidic)	1.42	0.185	-2.236	GPAT3,LPCAT1,LPCAT2,LPCAT3,MBOAT1
IL-17 Signaling	0.793	0.0914	-2.668	CNTF,CSF3,IL11,IL12B,IL17RE,IL1B,Il31,LIF,LTB,MAPK11,MAPK12,MAPK13,MMP3,MMP9,PIK3C2G,PIK3R6,TNFSF8
Lipid Antigen Presentation by CD1	0	0.00721	#NUM!	CD1D,FCER1G,Trbc1
Cell Cycle Regulation by BTG Family Proteins	0	0.0541	#NUM!	PPM1J,PPP2R2C
Polyamine Regulation in Colon Cancer	0	0.0517	#NUM!	BCL2L11,EIF5A2,SMS
Antiproliferative Role of Somatostatin Receptor 2	0	0.039	#NUM!	GAST,PIK3C2G,PIK3R6
Androgen Signaling	0	0.0533	-0.816	CACNA1A,CACNA2D4,CACNB1,GNA14,GNAO1,GTF2H3,KAT2B,PRKCQ,PRKD1
Aldosterone Signaling in Epithelial Cells	0	0.0552	-0.816	AHCY,HSPA12B,HSPA1L,KCNU1,PIK3C2G,PIK3R6,PLCD4,PRKCQ,PRKD1
Melanoma Signaling	0	0.06	#NUM!	CDH1,PIK3C2G,PIK3R6
Prostate Cancer Signaling	0	0.0354	#NUM!	CASP9,LEF1,PIK3C2G,PIK3R6
Renal Cell Carcinoma Signaling	0	0.0506	#NUM!	HGF,PDGFB,PIK3C2G,PIK3R6
Type I Diabetes Mellitus Signaling	0	0.0256	-1.633	CASP9,CD86,FCER1G,HLA-A,ICA1,IL12B,IL1B,MAPK11,MAPK12,MAPK13,PRF1,SOCS1,Trbc1
Small Cell Lung Cancer Signaling	0	0.0632	1.342	CASP9,CDKN2B,FHIT,PIK3C2G,PIK3R6,TRAF4
Allograft Rejection Signaling	0	0.0149	#NUM!	CD86,FCER1G,H2-T24,HLA-A,IGKC,PRF1,Trbc1
Glioma Signaling	0	0.065	-0.378	CDKN2B,IGF2,PDGFB,PDGFD,PIK3C2G,PIK3R6,PRKCQ,PRKD1
Autoimmune Thyroid Disease Signaling	0	0.0133	#NUM!	CD86,FCER1G,HLA-A,IGKC,PRF1,Trbc1
Thyroid Cancer Signaling	0	0.0633	-1.342	CDH1,LEF1,PDK1,PIK3C2G,PIK3R6
Bladder Cancer Signaling	0	0.0522	#NUM!	CDH1,FGF11,FGF5,FGF9,MMP3,MMP9
Graft-versus-Host Disease Signaling	0	0.0135	#NUM!	CD86,FCER1G,HLA-A,IL1B,PRF1,Trbc1
Chronic Myeloid Leukemia Signaling	0	0.0283	#NUM!	PIK3C2G,PIK3R6,STAT5A
Non-Small Cell Lung Cancer Signaling	0	0.043	1	CASP9,FHIT,PIK3C2G,PIK3R6
ERK5 Signaling	0	0.0405	#NUM!	LIF,MEF2B,RPS6KA2
MYC Mediated Apoptosis Signaling	0	0.04	#NUM!	BCL2L11,CASP9
G Beta Gamma Signaling	0	0.0698	-0.333	ADCY1,BTK,CACNA1A,CACNA2D4,CACNB1,GNA14,GNAO1,PRKCQ,PRKD1
G Protein Signaling Mediated by Tubby	0	0.0455	#NUM!	GNA14,GNAO1
Communication between Innate and Adaptive Immune Cells	0	0.0183	#NUM!	CCL3L3,CCL4,CCL5,Ccl9,CD4,CD79A,CD86,FCER1G,HLA-A,IGKC,IL12B,IL1B,Tlr12,TLR9,TNFRSF13B,Trbc1,ZBTB12
Systemic Lupus Erythematosus Signaling	0	0.0242	#NUM!	C5,CD79A,CD86,FCER1G,FCGR2A,HLA-A,IGKC,IL1B,LAT,LSM5,PIK3C2G,PIK3R6,SNRPF,TLR9,Trbc1
Xenobiotic Metabolism PXR Signaling Pathway	0.453	0.0794	-2.84	ABCC2,ALDH3A1,CHST1,CYP2B6,GAL3ST2,GSTA5,HS3ST3B1,IL4I1,PPP1R3C,PRKCQ,PRKD1,Sult1d1,UGT1A4,UGT1A6,Ugt1a7c
Role of PKR in Interferon Induction and Antiviral Response	0	0.0662	-3	CASP9,HSPA1L,IL1B,MAPK11,MAPK12,MAPK13,PDGFB,PDGFD,TLR9
EIF2 Signaling	0	0.0226	#NUM!	ACTG2,PIK3C2G,PIK3R6,RPL35A,RPS28
Retinoic acid Mediated Apoptosis Signaling	0	0.0333	#NUM!	CASP9,Ifnz (includes others)
RHOA Signaling	0	0.0569	0.378	ACTG2,LPAR2,LPAR3,MYL3,MYL4,MYLK3,PFN4
Senescence Pathway	0.365	0.0741	-3.13	ATM,CACNA1A,CACNA2D4,CACNB1,CAPN5,CDC25C,CDKN2B,CHEK2,DMTF1,ELF3,KAT2B,MAPK12,MAPKAPK3,PDK1,PDK2,PHF19,PIK3C2G,PIK3R6,PPM1J,PPP2R2C,Saa3,SMAD9
Ovarian Cancer Signaling	0	0.0573	#NUM!	BRCA1,FGF9,FZD9,LEF1,MMP9,PIK3C2G,PIK3R6,WNT3A,WNT8B
Altered T Cell and B Cell Signaling in Rheumatoid Arthritis	0	0.0224	#NUM!	CD79A,CD86,FCER1G,HLA-A,IL12B,IL1B,LTB,Tlr12,TLR9,TNFRSF13B,Trbc1
Estrogen-Dependent Breast Cancer Signaling	0	0.0375	#NUM!	PIK3C2G,PIK3R6,STAT5A
Dendritic Cell Maturation	0	0.039	-3.13	CD1D,CD86,COL2A1,COL5A3,FCER1G,FCGR2A,FSCN2,HLA-A,IGKC,IL12B,IL1B,IL1RL2,LTB,MAPK11,MAPK12,MAPK13,PIK3C2G,PIK3R6,PLCD4,TLR9,Trbc1,TYROBP,ZBTB12
Granzyme A Signaling	0	0.0556	#NUM!	PRF1
TWEAK Signaling	0	0.027	#NUM!	CASP9
NUR77 Signaling in T Lymphocytes	0	0.0181	-0.816	CASP9,CD86,FCER1G,H2-T24,HLA-A,PDK1,PRKCQ,PRKD1,Trbc1
PKCθ Signaling in T Lymphocytes	0	0.0306	-1.941	CACNA1A,CACNA2D4,CACNB1,CD4,CD86,FCER1G,GRAP2,HLA-A,LAT,MAP3K13,MAP3K4,PIK3C2G,PIK3R6,PRKCQ,RAC2,Trbc1,VAV3
TNFR1 Signaling	0	0.0392	#NUM!	CASP9,TNFAIP3
Role of MAPK Signaling in the Pathogenesis of Influenza	0	0.0617	#NUM!	CCL5,LCAT,MAPK11,MAPK12,MAPK13
TNFR2 Signaling	0	0.0312	#NUM!	TNFAIP3
Xenobiotic Metabolism CAR Signaling Pathway	0.777	0.0909	-3.153	ABCC2,ALDH3A1,CHST1,CYP2B6,FMO4,Fmo6,GAL3ST2,GSTA5,HS3ST3B1,PPM1J,PPP2R2C,PRKCQ,PRKD1,Sult1d1,UGT1A4,UGT1A6,Ugt1a7c
Antiproliferative Role of TOB in T Cell Signaling	0	0.00469	#NUM!	FCER1G,Trbc1
OX40 Signaling Pathway	0	0.0129	#NUM!	CD4,FCER1G,H2-T24,HLA-A,MAPK12,Trbc1
PI3K Signaling in B Lymphocytes	0	0.035	-1.342	BTK,CD79A,PIK3AP1,PLCD4,VAV3
Extrinsic Prothrombin Activation Pathway	0	0.0625	#NUM!	F13A1
P2Y Purigenic Receptor Signaling Pathway	0	0.0602	-0.707	ADCY1,ADCY3,ADCY8,PIK3C2G,PIK3R6,PLCD4,PRKCQ,PRKD1
Cyclins and Cell Cycle Regulation	0	0.0482	1	ATM,CDKN2B,PPM1J,PPP2R2C
Assembly of RNA Polymerase II Complex	0	0.02	#NUM!	GTF2H3
Role of JAK2 in Hormone-like Cytokine Signaling	0	0.0588	#NUM!	SOCS1,STAT5A
NGF Signaling	0	0.0667	-1.134	MAP3K13,MAP3K4,MAPK12,PIK3C2G,PIK3R6,RPS6KA2,SMPD4,TRAF4
Telomerase Signaling	0	0.0566	0	ELF3,IL2RG,PIK3C2G,PIK3R6,PPM1J,PPP2R2C
Hematopoiesis from Pluripotent Stem Cells	0	0.0181	#NUM!	CD4,CSF3,FCER1G,IGKC,IL11,IL12B,LIF,Trbc1
VEGF Family Ligand-Receptor Interactions	0	0.0595	0.447	FLT4,PIK3C2G,PIK3R6,PRKCQ,PRKD1
Ephrin B Signaling	0	0.0556	-1	GNA14,GNAO1,RAC2,VAV3
GDNF Family Ligand-Receptor Interactions	0	0.0658	-1.342	ARTN,DOK3,MAPK12,PIK3C2G,PIK3R6
Bupropion Degradation	0	0.04	#NUM!	CYP2B6
Retinoate Biosynthesis I	0	0.0488	#NUM!	Akr1c14,RDH10
Chondroitin Sulfate Degradation (Metazoa)	0	0.0625	#NUM!	CEMIP2
Heparan Sulfate Biosynthesis (Late Stages)	0	0.0667	-1.342	CHST1,GAL3ST2,HS3ST3B1,PLA1A,Sult1d1
Glutathione Redox Reactions I	0	0.037	#NUM!	GSTA5
NAD Salvage Pathway II	0	0.04	#NUM!	PXYLP1
Pyridoxal 5'-phosphate Salvage Pathway	0	0.0462	#NUM!	POMK,PRKAA2,PRKCQ
Pyrimidine Deoxyribonucleotides De Novo Biosynthesis I	0	0.0435	#NUM!	NME3
Triacylglycerol Degradation	0	0.0556	#NUM!	ABHD6,DAGLA,PLA1A
D-myo-inositol (1,4,5)-Trisphosphate Biosynthesis	0	0.0385	#NUM!	PLCD4
Estrogen Biosynthesis	0	0.0227	#NUM!	CYP2B6
Dermatan Sulfate Degradation (Metazoa)	0	0.0588	#NUM!	CEMIP2
TCA Cycle II (Eukaryotic)	0	0.0435	#NUM!	OGDHL
Bile Acid Biosynthesis, Neutral Pathway	0	0.0556	#NUM!	Akr1c14
D-myo-inositol (1,4,5)-trisphosphate Degradation	0	0.0625	#NUM!	INPP5E
Retinol Biosynthesis	0	0.0667	#NUM!	BCO1,LRAT,RDH10
Salvage Pathways of Pyrimidine Ribonucleotides	0	0.0625	0	NME3,POMK,PRKAA2,PRKCQ,UPP1,UPRT
Methylglyoxal Degradation III	0	0.0345	#NUM!	Akr1c14
Histamine Degradation	0	0.0526	#NUM!	ALDH3A1
Stearate Biosynthesis I (Animals)	0	0.0476	#NUM!	ASPG,MBLAC2,PORCN
Noradrenaline and Adrenaline Degradation	0	0.0571	#NUM!	ALDH3A1,IL4I1
Acetone Degradation I (to Methylglyoxal)	0	0.025	#NUM!	CYP2B6
Oxidative Ethanol Degradation III	0	0.0625	#NUM!	ALDH3A1,CYP2B6,Cyp2c23
Ethanol Degradation IV	0	0.0455	#NUM!	ALDH3A1
Ethanol Degradation II	0	0.0312	#NUM!	ALDH3A1
Superpathway of Cholesterol Biosynthesis	0	0.069	#NUM!	Idi2,TM7SF2
Epithelial Adherens Junction Signaling	0	0.0577	-0.333	CDH1,DLL1,HGF,LEF1,NOTCH3,PPM1J,PPP2R2C,PRKAA2,RACGAP1
TEC Kinase Signaling	0	0.0451	-1.698	ACTG2,BTK,FCER1A,FCER1G,GNA14,GNAO1,ITGA4,ITGA6,ITGAE,ITGB2,ITGB4,ITGB8,ITK,MAPK12,PIK3C2G,PIK3R6,PRKCQ,PRKD1,RAC2,RHOF,RHOH,RHOV,STAT5A,TEC,Trbc1,VAV3
Oxidative Phosphorylation	0	0.0273	#NUM!	COX10,COX7A1,NDUFA1
Adipogenesis pathway	0	0.0522	#NUM!	EBF1,FZD9,GTF2H3,KAT2B,PLIN1,SMAD9,SOX9
HIPPO signaling	0	0.0588	#NUM!	DLG3,PATJ,PPM1J,PPP1R3C,PPP2R2C
Unfolded protein response	0	0.0222	#NUM!	EDEM1,HSPA1L
WNT/Ca+ pathway	0	0.0455	#NUM!	FZD9,PDE6B,PLCD4
Estrogen Receptor Signaling	0	0.0541	-1.342	ADCY1,ADCY3,ADCY8,CACNA1A,CACNA2D4,CACNB1,FOXO6,GNA14,GNAO1,IGF2,MMP3,MMP9,MYL3,MYL4,PGR,PIK3C2G,PIK3R6,PLCD4,PRKAA2,PRKCQ,PRKD1,SHE
Cell Cycle: G1/S Checkpoint Regulation	0	0.0299	#NUM!	ATM,CDKN2B
ERK/MAPK Signaling	0	0.0651	0.333	ELF3,ITGA4,ITGA6,ITGAE,ITGB2,ITGB4,ITGB8,PIK3C2G,PIK3R6,PPM1J,PPP1R3C,PPP2R2C,RAC2,SRF
Nucleotide Excision Repair Pathway	0	0.0571	#NUM!	ERCC8,GTF2H3
SAPK/JNK Signaling	0	0.0159	-1.134	FCER1G,MAP3K13,MAP3K4,MAPK12,PIK3C2G,PIK3R6,RAC2,Trbc1
Interferon Signaling	0	0.0556	#NUM!	PTPN2,SOCS1
Protein Ubiquitination Pathway	0	0.0292	#NUM!	BRCA1,CDC20,HLA-A,HSPA12B,HSPA1L,USP18,USP43,ZBTB12
Endoplasmic Reticulum Stress Pathway	0	0.0476	#NUM!	CASP9
IL-4 Signaling	0	0.0659	#NUM!	HLA-A,HMGA1,IL2RG,PIK3C2G,PIK3R6,SOCS1
Antigen Presentation Pathway	0	0.0526	#NUM!	HLA-A,NLRC5
CREB Signaling in Neurons	1.4	0.0896	-2.219	ACKR4,ADCY1,ADCY3,ADCY8,ADCYAP1R1,ADGRD1,ADORA2B,ADORA3,AGTR1,AVPR1A,C5AR1,CACNA1A,CACNA2D4,CACNB1,CALCR,CCKAR,CCR10,FLT4,FZD9,GHRHR,GLP1R,GNA14,GNAO1,GPR152,GPR173,GPR35,GPR52,GPR62,GPR88,GRIA2,GRIN2C,HCAR2,HGF,HRH2,HRH4,LGR5,LPAR2,LPAR3,LTB4R,MC1R,OPN1LW,P2RY10,P2RY14,PDGFB,PIK3C2G,PIK3R6,PLCD4,PRKCQ,PRKD1,PTAFR,RRH,RXFP4,S1PR4,TBXA2R
Insulin Receptor Signaling	0	0.0286	-1	GYS1,PIK3C2G,PIK3R6,PPP1R3C
Phototransduction Pathway	0	0.037	#NUM!	OPN1LW,PDE6B
Neurotrophin/TRK Signaling	0	0.0256	#NUM!	PIK3C2G,PIK3R6
Death Receptor Signaling	0	0.0312	#NUM!	ACTG2,CASP9,DFFA
PPAR Signaling	0	0.0467	1.342	IL1B,IL1RL2,PDGFB,PDGFD,STAT5A
IGF-1 Signaling	0	0.0577	1.342	CASP9,CCN3,PIK3C2G,PIK3R6,SOCS1,SRF
Glutamate Receptor Signaling	0	0.0606	#NUM!	GRIA2,GRIN2C,HOMER2,SLC17A2
FAK Signaling	0	0.0676	-3.347	ACKR4,ADCYAP1R1,ADGRD1,ADORA2B,ADORA3,AGTR1,AVPR1A,C5AR1,CALCR,CAPN5,CCKAR,CCR10,CDH1,COL2A1,COL5A3,CSF2RB,EFNA3,EFNA5,ELF3,FCER1G,FLT4,FZD9,GHRHR,GLP1R,GPR152,GPR173,GPR35,GPR52,GPR62,GPR88,HCAR2,HRH2,HRH4,IL13RA2,IL17RE,IL1RL2,IL21R,IL27RA,IL2RG,IL31RA,IL5RA,ITGA4,ITGA6,ITGAE,ITGB2,ITGB4,ITGB8,KIT,LEF1,LGR5,LPAR2,LPAR3,LTB4R,MAPK11,MAPK12,MAPK13,MC1R,MMP9,OPN1LW,P2RY10,P2RY14,PIK3C2G,PIK3R6,PTA…
Apoptosis Signaling	0	0.0673	-0.378	BCL2A1,BCL2L11,CAPN5,CASP9,DFFA,ENDOG,PRKCQ
NF-κB Signaling	0	0.0211	-0.905	FCER1G,FLT4,IL1B,IRAK4,PIK3C2G,PIK3R6,PRKCQ,SIGIRR,TAB3,TLR9,TNFAIP3,Trbc1
VEGF Signaling	0	0.051	0.447	ACTG2,ACTN2,FLT4,PIK3C2G,PIK3R6
Hypoxia Signaling in the Cardiovascular System	0	0.0132	#NUM!	ATM
T Cell Receptor Signaling	0	0.0333	-3.578	CD4,CD86,FCER1G,GRAP2,H2-T24,HLA-A,ICOS,ITGB2,ITK,LAT,LEF1,MAPK11,MAPK12,MAPK13,PDK1,PIK3C2G,PIK3R6,PRKCQ,Trbc1,VAV3
PDGF Signaling	0	0.0581	-1.342	PDGFB,PDGFD,PIK3C2G,PIK3R6,SRF
BMP signaling pathway	0	0.0698	-0.447	CHRD,FST,MAPK11,MAPK12,MAPK13,SMAD9
Autophagy	0	0.0651	-1.069	ATM,HGF,MAPK12,NOD2,OPTN,PDGFB,PIK3C2G,PIK3R6,PPM1J,PPP2R2C,PRKAA2,PRKCQ,RIPK2,SLC7A5
Cancer Drug Resistance By Drug Efflux	0	0.0517	#NUM!	ABCC2,FOXO6,PDK1
Sirtuin Signaling Pathway	0	0.0453	1	BCL2L11,CDH1,CPT1B,LDHC,MAPK12,NDUFA1,NR1H4,PDK1,PRKAA2,TOMM20L,TOMM7,TUBA4A,TUBA8
Iron homeostasis signaling pathway	0	0.0511	#NUM!	ATP6V1C2,HBA1/HBA2,HBB,HIF3A,MCOLN1,PDGFB,STAT5A
Th17 Activation Pathway	0	0.0145	-1.633	FCER1G,IL12B,IL1B,IL21R,IRAK4,RORC,Trbc1
SPINK1 Pancreatic Cancer Pathway	0	0.0345	#NUM!	CPZ,CTRL
SPINK1 General Cancer Pathway	0	0.0597	-1	Mt1,Mt2,PIK3C2G,PIK3R6
Apelin Muscle Signaling Pathway	0	0.0625	#NUM!	GNA14,GNAO1,PRKAA2
BAG2 Signaling Pathway	0	0.0122	#NUM!	HSPA1L
PFKFB4 Signaling Pathway	0	0.0417	#NUM!	AMPD1,FBP2
T Cell Exhaustion Signaling Pathway	0	0.0266	-0.577	CD274,CD86,FCER1G,HLA-A,IL12B,MAPK12,PDCD1LG2,PDK1,PIK3C2G,PIK3R6,PPM1J,PPP2R2C,PRDM1,PRKCQ,Trbc1
Breast Cancer Regulation by Stathmin1	1.39	0.0897	-2.06	ACKR4,ADCYAP1R1,ADGRD1,ADORA2B,ADORA3,AGTR1,AVPR1A,C5AR1,CALCR,CCKAR,CCR10,FOXM1,FZD9,GHRHR,GLP1R,GPR152,GPR173,GPR35,GPR52,GPR62,GPR88,HCAR2,HGF,HRH2,HRH4,LGR5,LPAR2,LPAR3,LTB4R,MC1R,MMP9,OPN1LW,P2RY10,P2RY14,PDGFB,PIK3C2G,PIK3R6,PPM1J,PPP1R3C,PPP2R2C,PRKCQ,PRKD1,PTAFR,RAC2,RRH,RXFP4,S1PR4,TBXA2R,TUBA4A,TUBA8,TUBB2B,TUBB3,TUBB4A
Systemic Lupus Erythematosus In B Cell Signaling Pathway	0	0.0376	-1.177	BCL2L11,BTK,CD79A,CNTF,FCGR2A,FOXO6,IGKC,IL11,IL12B,IL1B,Il31,IRAK4,LIF,LILRB3,LILRB4,LTB,PIK3AP1,PIK3C2G,PIK3R6,PRKCQ,PRKD1,RAC2,RASGRP3,SHE,TLR9,TNFSF8,TRAF4
Inhibition of ARE-Mediated mRNA Degradation Pathway	0	0.0566	-0.333	EDC3,LTB,MAPK11,MAPK12,MAPK13,PPM1J,PPP2R2C,TNFSF18,TNFSF8
HOTAIR Regulatory Pathway	0	0.0679	-1.508	CDH1,FOXM1,LEF1,MMP3,MMP9,PCDHB5,PIK3C2G,PIK3R6,SRF,WNT3A,WNT8B
BEX2 Signaling Pathway	0	0.0494	0	LEF1,MAPK12,PPM1J,PPP2R2C
Necroptosis Signaling Pathway	0	0.0258	0	CAPN5,MLKL,TOMM20L,TOMM7
Cardiac Hypertrophy Signaling	1.37	0.1	-2.236	ADCY1,ADCY3,ADCY8,CACNA1A,CACNA2D4,CACNB1,GNA14,GNAO1,HAND2,MAP3K13,MAP3K4,MAPK11,MAPK12,MAPK13,MAPKAPK3,MEF2B,MYL3,MYL4,PIK3C2G,PIK3R6,PLCD4,RAC2,RHOF,RHOH,RHOV,SRF
MSP-RON Signaling In Cancer Cells Pathway	0	0.0643	-1	CSF2RB,ELF3,ITGA6,ITGB4,LEF1,PIK3C2G,PIK3R6,RPS6KA2,ST14
MSP-RON Signaling In Macrophages Pathway	0	0.0517	0	IL12B,ITGB2,PIK3C2G,PIK3R6,SOCS1,ST14
GM-CSF Signaling	0	0.0571	-1	BCL2A1,CSF2RB,PIK3C2G,PIK3R6
Eicosanoid Signaling	0	0.0597	#NUM!	DPEP3,LCAT,LTB4R,TBXA2R
Ferroptosis Signaling Pathway	0	0.0462	-0.816	ALOXE3,CBS/CBSL,CHAC1,LPCAT3,NOX1,PRKAA2
Role of MAPK Signaling in Promoting the Pathogenesis of Influenza	0	0.0446	-1.342	ATP6V1C2,LCAT,MAPK11,MAPK12,MAPK13

## Sheet: 工作表1
Ingenuity Canonical Pathways	Molecules
Leukocyte Extravasation Signaling	ACTG2	ACTN2	BTK	CLDN1	CLDN12	CLDN24	CLDN4	CLDN8	ITGA4	ITGB2	ITK	MAP3K4	MAPK11	MAPK12	MAPK13	MMP3	MMP9	NCF2	NCF4	NOX1	PIK3C2G	PIK3R6	PRKCQ	PRKD1	RAC2	RHOH	SELPLG	TEC	TIMP1	VAV3
Cardiac Hypertrophy Signaling (Enhanced)	ADCY1	ADCY3	ADCY8	AGTR1	ATP2A1	CACNA1A	CACNA2D4	CACNB1	CNTF	CSF2RB	FGF11	FGF5	FGF9	FZD9	GDPD1	GNA14	HAND2	IL11	IL12B	IL13RA2	IL17RE	IL1B	IL1RL2	IL21R	IL27RA	IL2RG	Il31	IL31RA	IL5RA	ITGA4	ITGA6	ITGAE	ITGB2	ITGB4	ITGB8	LIF	LTB	MAP3K13	MAP3K4	MAPK11	MAPK12	MAPK13	MAPKAPK3	MEF2B	NPPA	PDE1A	PDE6B	PDE7A	PDK1
Hepatic Fibrosis Signaling Pathway	AGTR1	APC2	CACNA1A	CACNA2D4	CACNB1	CCL5	COL2A1	COL5A3	FLT4	FZD9	GLI1	GLIS1	IL1B	IL1RL2	IRAK4	ITGA4	ITGA6	ITGAE	ITGB2	ITGB4	ITGB8	LEF1	MAPK11	MAPK12	MAPK13	MYL3	MYL4	MYLK3	NCF2	NOX1	PDGFB	PDGFD	PDK1	PIK3C2G	PIK3R6	PRKCQ	PRKD1	PTCH2	RAC2	RHOF	RHOH	RHOV	TIMP1	WNT3A	WNT8B
Phagosome Formation	ACKR4	ADCYAP1R1	ADGRD1	ADORA2B	ADORA3	AGTR1	APBB1IP	AVPR1A	C5AR1	CALCR	CCKAR	CCR10	CLEC4D	CLEC4E	FCER1A	FCER1G	FCGR2A	FZD9	GHRHR	GLP1R	GPLD1	GPR152	GPR173	GPR35	GPR52	GPR62	GPR88	HCAR2	HRH2	HRH4	IGKC	ITGA4	ITGA6	ITGAE	ITGB2	ITGB4	ITGB8	LAT	LBP	LCAT	LGR5	LPAR2	LPAR3	LTB4R	MAPK12	MC1R	MYL3	MYL4	MYLK3
G-Protein Coupled Receptor Signaling	ACKR4	ADCY1	ADCY3	ADCY8	ADCYAP1R1	ADGRD1	ADORA2B	ADORA3	AGTR1	ARRB2	AVPR1A	C5AR1	CALCR	CCKAR	CCR10	FOXO6	FZD9	GDPD1	GHRHR	GLP1R	GNA14	GNAO1	GPR152	GPR173	GPR35	GPR52	GPR62	GPR88	GRK3	HCAR2	HCN1	HCN3	HRH2	HRH4	KCNN3	KCNN4	LGR5	LPAR2	LPAR3	LTB4R	MAP3K13	MAP3K4	MAPK11	MAPK12	MAPK13	MC1R	MEF2B	MYL3	MYL4
Differential Regulation of Cytokine Production in Macrophages and T Helper Cells by IL-17A and IL-17F	CCL4	CCL5	CSF3	IL12B	IL1B
Triacylglycerol Biosynthesis	ASPG	DGAT2L6	GPAT3	LPCAT1	LPCAT2	LPCAT3	MBOAT1	PORCN
Differential Regulation of Cytokine Production in Intestinal Epithelial Cells by IL-17A and IL-17F	CCL4	CCL5	CSF3	IL12B	IL1B
CDP-diacylglycerol Biosynthesis I	GPAT3	LPCAT1	LPCAT2	LPCAT3	MBOAT1
Fc Epsilon RI Signaling	BTK	FCER1A	FCER1G	GRAP2	LAT	MAPK11	MAPK12	MAPK13	PIK3C2G	PIK3R6	PRKCQ	PRKD1	RAC2	VAV3
Phosphatidylglycerol Biosynthesis II (Non-plastidic)	GPAT3	LPCAT1	LPCAT2	LPCAT3	MBOAT1
CREB Signaling in Neurons	ACKR4	ADCY1	ADCY3	ADCY8	ADCYAP1R1	ADGRD1	ADORA2B	ADORA3	AGTR1	AVPR1A	C5AR1	CACNA1A	CACNA2D4	CACNB1	CALCR	CCKAR	CCR10	FLT4	FZD9	GHRHR	GLP1R	GNA14	GNAO1	GPR152	GPR173	GPR35	GPR52	GPR62	GPR88	GRIA2	GRIN2C	HCAR2	HGF	HRH2	HRH4	LGR5	LPAR2	LPAR3	LTB4R	MC1R	OPN1LW	P2RY10	P2RY14	PDGFB	PIK3C2G	PIK3R6	PLCD4	PRKCQ	PRKD1
Breast Cancer Regulation by Stathmin1	ACKR4	ADCYAP1R1	ADGRD1	ADORA2B	ADORA3	AGTR1	AVPR1A	C5AR1	CALCR	CCKAR	CCR10	FOXM1	FZD9	GHRHR	GLP1R	GPR152	GPR173	GPR35	GPR52	GPR62	GPR88	HCAR2	HGF	HRH2	HRH4	LGR5	LPAR2	LPAR3	LTB4R	MC1R	MMP9	OPN1LW	P2RY10	P2RY14	PDGFB	PIK3C2G	PIK3R6	PPM1J	PPP1R3C	PPP2R2C	PRKCQ	PRKD1	PTAFR	RAC2	RRH	RXFP4	S1PR4	TBXA2R	TUBA4A
Cardiac Hypertrophy Signaling	ADCY1	ADCY3	ADCY8	CACNA1A	CACNA2D4	CACNB1	GNA14	GNAO1	HAND2	MAP3K13	MAP3K4	MAPK11	MAPK12	MAPK13	MAPKAPK3	MEF2B	MYL3	MYL4	PIK3C2G	PIK3R6	PLCD4	RAC2	RHOF	RHOH	RHOV	SRF
[truncated: 18 more columns]

## Sheet: 工作表2
Leukocyte Extravasation Signaling	Cardiac Hypertrophy Signaling (Enhanced)	Hepatic Fibrosis Signaling Pathway	Phagosome Formation	G-Protein Coupled Receptor Signaling	Differential Regulation of Cytokine Production in Macrophages and T Helper Cells by IL-17A and IL-17F	Triacylglycerol Biosynthesis	Differential Regulation of Cytokine Production in Intestinal Epithelial Cells by IL-17A and IL-17F	CDP-diacylglycerol Biosynthesis I	Fc Epsilon RI Signaling	Phosphatidylglycerol Biosynthesis II (Non-plastidic)	CREB Signaling in Neurons	Breast Cancer Regulation by Stathmin1	Cardiac Hypertrophy Signaling
30	59	45	66	67	5	8	5	5	14	5	54	53	26
ACTG2	ADCY1	AGTR1	ACKR4	ACKR4	CCL4	ASPG	CCL4	GPAT3	BTK	GPAT3	ACKR4	ACKR4	ADCY1
ACTN2	ADCY3	APC2	ADCYAP1R1	ADCY1	CCL5	DGAT2L6	CCL5	LPCAT1	FCER1A	LPCAT1	ADCY1	ADCYAP1R1	ADCY3
BTK	ADCY8	CACNA1A	ADGRD1	ADCY3	CSF3	GPAT3	CSF3	LPCAT2	FCER1G	LPCAT2	ADCY3	ADGRD1	ADCY8
CLDN1	AGTR1	CACNA2D4	ADORA2B	ADCY8	IL12B	LPCAT1	IL12B	LPCAT3	GRAP2	LPCAT3	ADCY8	ADORA2B	CACNA1A
CLDN12	ATP2A1	CACNB1	ADORA3	ADCYAP1R1	IL1B	LPCAT2	IL1B	MBOAT1	LAT	MBOAT1	ADCYAP1R1	ADORA3	CACNA2D4
CLDN24	CACNA1A	CCL5	AGTR1	ADGRD1		LPCAT3			MAPK11		ADGRD1	AGTR1	CACNB1
CLDN4	CACNA2D4	COL2A1	APBB1IP	ADORA2B		MBOAT1			MAPK12		ADORA2B	AVPR1A	GNA14
CLDN8	CACNB1	COL5A3	AVPR1A	ADORA3		PORCN			MAPK13		ADORA3	C5AR1	GNAO1
ITGA4	CNTF	FLT4	C5AR1	AGTR1					PIK3C2G		AGTR1	CALCR	HAND2
ITGB2	CSF2RB	FZD9	CALCR	ARRB2					PIK3R6		AVPR1A	CCKAR	MAP3K13
ITK	FGF11	GLI1	CCKAR	AVPR1A					PRKCQ		C5AR1	CCR10	MAP3K4
MAP3K4	FGF5	GLIS1	CCR10	C5AR1					PRKD1		CACNA1A	FOXM1	MAPK11
MAPK11	FGF9	IL1B	CLEC4D	CALCR					RAC2		CACNA2D4	FZD9	MAPK12
MAPK12	FZD9	IL1RL2	CLEC4E	CCKAR					VAV3		CACNB1	GHRHR	MAPK13
MAPK13	GDPD1	IRAK4	FCER1A	CCR10							CALCR	GLP1R	MAPKAPK3
MMP3	GNA14	ITGA4	FCER1G	FOXO6							CCKAR	GPR152	MEF2B
MMP9	HAND2	ITGA6	FCGR2A	FZD9							CCR10	GPR173	MYL3
NCF2	IL11	ITGAE	FZD9	GDPD1							FLT4	GPR35	MYL4
NCF4	IL12B	ITGB2	GHRHR	GHRHR							FZD9	GPR52	PIK3C2G
NOX1	IL13RA2	ITGB4	GLP1R	GLP1R							GHRHR	GPR62	PIK3R6
PIK3C2G	IL17RE	ITGB8	GPLD1	GNA14							GLP1R	GPR88	PLCD4
PIK3R6	IL1B	LEF1	GPR152	GNAO1							GNA14	HCAR2	RAC2
PRKCQ	IL1RL2	MAPK11	GPR173	GPR152							GNAO1	HGF	RHOF
PRKD1	IL21R	MAPK12	GPR35	GPR173							GPR152	HRH2	RHOH
RAC2	IL27RA	MAPK13	GPR52	GPR35							GPR173	HRH4	RHOV
RHOH	IL2RG	MYL3	GPR62	GPR52							GPR35	LGR5	SRF
SELPLG	Il31	MYL4	GPR88	GPR62							GPR52	LPAR2
TEC	IL31RA	MYLK3	HCAR2	GPR88							GPR62	LPAR3
TIMP1	IL5RA	NCF2	HRH2	GRK3							GPR88	LTB4R
VAV3	ITGA4	NOX1	HRH4	HCAR2							GRIA2	MC1R
	ITGA6	PDGFB	IGKC	HCN1							GRIN2C	MMP9
	ITGAE	PDGFD	ITGA4	HCN3							HCAR2	OPN1LW
	ITGB2	PDK1	ITGA6	HRH2							HGF	P2RY10
	ITGB4	PIK3C2G	ITGAE	HRH4							HRH2	P2RY14
	ITGB8	PIK3R6	ITGB2	KCNN3							HRH4	PDGFB
	LIF	PRKCQ	ITGB4	KCNN4							LGR5	PIK3C2G
	LTB	PRKD1	ITGB8	LGR5							LPAR2	PIK3R6
	MAP3K13	PTCH2	LAT	LPAR2							LPAR3	PPM1J
	MAP3K4	RAC2	LBP	LPAR3							LTB4R	PPP1R3C
	MAPK11	RHOF	LCAT	LTB4R							MC1R	PPP2R2C
	MAPK12	RHOH	LGR5	MAP3K13							OPN1LW	PRKCQ
	MAPK13	RHOV	LPAR2	MAP3K4							P2RY10	PRKD1
	MAPKAPK3	TIMP1	LPAR3	MAPK11							P2RY14	PTAFR
	MEF2B	WNT3A	LTB4R	MAPK12							PDGFB	RAC2
	NPPA	WNT8B	MAPK12	MAPK13							PIK3C2G	RRH
	PDE1A		MC1R	MC1R							PIK3R6	RXFP4
	PDE6B		MYL3	MEF2B							PLCD4	S1PR4
	PDE7A		MYL4	MYL3							PRKCQ	TBXA2R
	PDK1		MYLK3	MYL4							PRKD1	TUBA4A
	PIK3C2G		OPN1LW	MYLK3							PTAFR	TUBA8
	PIK3R6		P2RY10	OPN1LW							RRH	TUBB2B
	PLCD4		P2RY14	P2RY10							RXFP4	TUBB3
	PRKCQ		PIK3C2G	P2RY14							S1PR4	TUBB4A
	PRKD1		PIK3R6	PDE1A							TBXA2R
	RYR1		PLD4	PDE6B
	SRF		PRKCQ	PDE7A
	TNFSF8		PRKD1	PIK3C2G
	WNT3A		PTAFR	PIK3R6
	WNT8B		RAC2	PTAFR
			RRH	RAC2
			RXFP4	RRH
			S1PR4	RXFP4
			TBXA2R	S1PR4
			Tlr12	SIX1
			TLR9	SRF
			VAV3	SYNGAP1
				TBXA2R

## Sheet: 工作表2 (2)
gene
ACKR4
ADCYAP1R1
ADGRD1
ADORA2B
ADORA3
AGTR1
AVPR1A
C5AR1
CALCR
CCKAR
CCR10
FOXM1
FZD9
GHRHR
GLP1R
GPR152
GPR173
GPR35
GPR52
GPR62
GPR88
HCAR2
HGF
HRH2
HRH4
LGR5
LPAR2
LPAR3
LTB4R
MC1R
MMP9
OPN1LW
P2RY10
P2RY14
PDGFB
PIK3C2G
PIK3R6
PPM1J
PPP1R3C
PPP2R2C
PRKCQ
PRKD1
PTAFR
RAC2
RRH
RXFP4
S1PR4
TBXA2R
TUBA4A
TUBA8
TUBB2B
TUBB3
TUBB4A
ARRB2
ADCY1
ADCY3
ADCY8
FOXO6
GNA14
GNAO1
GRK3
GDPD1
HCN1
HCN3
KCNN3
KCNN4
MAP3K13
MAP3K4
MAPK11
MAPK12
MAPK13
MEF2B
MYL3
MYL4
MYLK3
PDE1A
PDE6B
PDE7A
SIX1
SRF
SYNGAP1
CACNA1A
CACNA2D4
CACNB1
FLT4
GRIA2
GRIN2C
PLCD4
CCL4
CCL5
CSF3
IL12B
IL1B
GPAT3
LPCAT1
LPCAT2
LPCAT3
MBOAT1
IGKC
ITGA4
ITGA6
ITGAE
ITGB2
ITGB4
ITGB8
LAT
LBP
LCAT
APBB1IP
CLEC4D
CLEC4E
FCER1A
FCER1G
FCGR2A
GPLD1
PLD4
PORCN
GRAP2
BTK
ACTG2
ACTN2
CLDN1
CLDN12
CLDN24
CLDN4
CLDN8
SELPLG
TEC
ITK
MMP3
NCF4
PDGFD
RHOF
RHOH
RHOV
TIMP1
ASPG
DGAT2L6
APC2
GLI1
GLIS1
LEF1
PTCH2
IRAK4
NCF2
NOX1
ATP2A1
Tlr12
TLR9
VAV3
CNTF
CSF2RB
FGF11
FGF5
FGF9
IL13RA2
IL17RE
HAND2
IL11
IL1RL2
IL21R
IL27RA
IL2RG
Il31
IL31RA
IL5RA
LIF
LTB
PDK1
NPPA
RYR1
MAPKAPK3
TNFSF8
WNT3A
WNT8B
COL2A1
COL5A3
