# Supplementary material for: Single-Cell Transcriptomic Profiles of Lung Pre-Metastatic Niche Reveal Neutrophil and Lymphatic Endothelial Cell Roles in Breast Cancer
Source: Cancers (Basel). 2022 Dec 28;15(1):176. doi: 10.3390/cancers15010176 (PMC9818165; doi:10.3390/cancers15010176)
Supplement: Supplementary file 1 [file cancers-15-00176-s001.zip › Table S18.xls]

## Sheet: Sheet0
© 2000-2022 QIAGEN. All rights reserved.
Ingenuity Canonical Pathways	-log(p-value)	Ratio	z-score	Molecules
Hepatic Fibrosis / Hepatic Stellate Cell Activation	5.6	0.218	#NUM!	A2M,ACTA2,AGT,Agtr1b,CCL21,CD14,COL10A1,COL11A1,COL11A2,COL13A1,COL24A1,COL25A1,COL26A1,COL2A1,COL5A3,COL6A5,COL7A1,COL9A1,COL9A2,COL9A3,CXCL3,CYP2E1,EDN1,EDNRB,FASLG,FGF1,FLT1,HGF,IFNGR2,IGFBP5,LAMA1,MET,MYL4,MYL6B,MYL7,MYO18A,MYO18B,MYO1H,MYO5C,NGFR,TNFRSF11B,TNFRSF1B
GP6 Signaling Pathway	4.48	0.228	1.671	COL10A1,COL11A1,COL11A2,COL13A1,COL24A1,COL25A1,COL26A1,COL2A1,COL5A3,COL6A5,COL7A1,COL9A1,COL9A2,COL9A3,LAMA1,LAMA3,LYN,NOX1,PIK3C2A,PIK3C2B,PIK3CB,PIK3R3,PIK3R5,PRKCH,PRKCI,PRKCZ,PRKD1,RASGRP2,SCHIP1
Signaling by Rho Family GTPases	3.45	0.173	0	ACTA2,ARHGEF15,ARHGEF18,ARHGEF9,CDC42EP3,CDH13,CDH17,CDH19,CDH2,CDH22,CDH5,DES,GNA14,GNA15,GNAO1,GNG13,GNG4,GNG7,ITGA10,ITGA3,ITGA4,ITGA8,ITGB4,LIMK1,LIMK2,MAP2K7,MAP3K11,MAPK10,MYL4,MYL6B,MYL7,NCF1,NOX1,PAK3,PARD6A,PIK3C2A,PIK3C2B,PIK3CB,PIK3R3,PIK3R5,PRKCI,PRKCZ,PTK2B,RAC3,RHOBTB2,WASF3
Molecular Mechanisms of Cancer	3.42	0.156	#NUM!	ADCY1,ARHGEF15,ARHGEF18,ARHGEF9,ATR,BMP7,BMP8A,CAMK2A,CASP7,CCNE2,CDK17,CDK20,CDKN2A,CHEK1,CHEK2,E2F2,E2F3,E2F7,ERAS,FANCD2,FASLG,FZD9,GAB2,GNA14,GNA15,GNAO1,GNG13,GNG4,GNG7,GUCY1A1,HDAC9,HIPK2,ITGA10,ITGA3,ITGA4,ITGA8,ITGB4,JAK3,MAP2K6,MAPK10,MAPK11,PAK3,PIK3C2A,PIK3C2B,PIK3CB,PIK3R3,PIK3R5,PRKCH,PRKCI,PRKCZ,PRKD1,PRKDC,PTCH1,PTCH2,RAC3,RASD1,RBL1,RHOBTB2,SMAD9,SOS1,STK36,SUFU,SUV39H1,TYK2,WNT10…
Cardiac Hypertrophy Signaling (Enhanced)	3.4	0.15	-0.5	ADCY1,ADRA1A,ADRA1B,ADRA2A,AGT,ATP2A1,CACNA1A,CACNA1D,CACNA2D2,CACNA2D3,CACNB1,CACNB2,CAMK2A,CSF2,CSF2RB,CTF1,EDN1,EDNRB,ENPP6,ERAS,FASLG,FGF1,FGF11,FGF12,FGF21,FGF9,FZD9,GNA14,GNA15,GNG13,GNG4,GNG7,GUCY1A1,HDAC9,HSPB2,IL12A,IL12RB1,IL13RA2,IL21R,IL22RA2,IL27RA,IL2RA,IL2RG,Il31,IL3RA,ITGA10,ITGA3,ITGA4,ITGA8,ITGB4,MAP2K6,MAP2K7,MAP3K11,MAP3K15,MAPK10,MAPK11,NGFR,NOTUM,NPR1,PDE2A,PDE4C,PIK3C2A,PIK…
Pulmonary Fibrosis Idiopathic Signaling Pathway	3.2	0.163	1.511	ACTA2,AREG,BIRC5,CCN4,CDH2,COL10A1,COL11A1,COL11A2,COL13A1,COL24A1,COL25A1,COL26A1,COL2A1,COL5A3,COL6A5,COL7A1,COL9A1,COL9A2,COL9A3,EDN1,ERAS,F2,FGF9,FZD9,GLI2,MAP2K6,MAPK10,MAPK11,MMP12,MMP15,MMP17,MMP27,MMP3,MRTFA,NOTCH4,PIK3C2A,PIK3C2B,PIK3CB,PIK3R3,PIK3R5,PRKN,PTK2B,RASD1,RPS6KA2,RPS6KA4,SOS1,TERT,TYK2,WNT10A,WNT10B,WNT2,WNT2B,WNT4
Axonal Guidance Signaling	3.17	0.15	#NUM!	ABLIM2,ADAM22,ADAM23,ADAM8,ADAMTS3,ADAMTS6,ADAMTS7,ARHGEF15,BMP7,BMP8A,ECE2,EFNB3,EPHA5,ERAS,FARP2,FES,FZD9,GLI2,GLIS1,GNA14,GNA15,GNAO1,GNG13,GNG4,GNG7,HHIP,ITGA10,ITGA3,ITGA4,ITGA8,ITGB4,KCNJ12,LIMK1,LIMK2,MET,MME,MMP12,MMP15,MMP17,MMP27,MMP3,MYL4,MYL6B,MYL7,NGFR,NOTUM,NTNG1,PAK3,PFN2,PIK3C2A,PIK3C2B,PIK3CB,PIK3R3,PIK3R5,PMPCA,PRKCH,PRKCI,PRKCZ,PRKD1,PTCH1,PTCH2,RAC3,RASD1,RTN4R,SOS1,SRGAP3,STK…
PD-1, PD-L1 cancer immunotherapy pathway	3.06	0.212	-0.218	CD28,CIP2A,HLA-A,HLA-DMB,HLA-DQA1,HLA-DQB1,IFNGR2,IL12A,IL2RA,IL2RG,JAK3,NGFR,PIK3C2A,PIK3C2B,PIK3CB,PIK3R3,PIK3R5,STAT5A,TNFRSF11B,TNFRSF1B,TYK2,ZBTB12
Glycogen Degradation III	2.95	0.462	0	MGAM,MTAP,PGM1,PGM3,PGM5,PYGM
Sperm Motility	2.91	0.167	-0.258	CACNA1G,CNGB3,CSF2RA,DYRK3,EPHA5,FES,FLT1,GNA14,GNA15,GNAO1,GNG13,GNG4,GNG7,GUCY1A1,HCK,JAK3,LMTK3,LYN,MAP2K6,MAP2K7,MAP3K11,MET,MUSK,NOTUM,NPPC,NPR1,PDE2A,PDE4C,PLA2G5,PLA2G7,PRKCH,PRKCI,PRKCZ,PRKD1,PRKG2,PTK2B,RET,ROR1,TEC,TYK2,TYRO3,ZAN
Thrombopoietin Signaling	2.79	0.238	0.277	ERAS,GAB2,PIK3C2A,PIK3C2B,PIK3CB,PIK3R3,PIK3R5,PRKCH,PRKCI,PRKCZ,PRKD1,RASD1,SOS1,STAT5A,THPO
RAC Signaling	2.77	0.19	0.243	ERAS,ITGA10,ITGA3,ITGA4,ITGA8,ITGB4,LIMK1,LIMK2,MAP2K7,MAP3K11,MCF2L,NCF1,NOX1,PAK3,PARD6A,PIK3C2A,PIK3C2B,PIK3CB,PIK3R3,PIK3R5,PRKCI,PRKCZ,PTK2B,RAC3,RASD1,SH3RF1
Salvage Pathways of Pyrimidine Ribonucleotides	2.75	0.208	1.342	ADPGK,AICDA,AK5,APOBEC2,CDA,CMPK2,GRK6,LIMK1,LIMK2,MAP2K6,NEK2,NME3,NME4,PAK3,PLK1,PRKCH,PRKX,UCK2,UCKL1,UPRT
GM-CSF Signaling	2.74	0.229	0.277	BCL2A1,CAMK2A,CISH,CSF2,CSF2RA,CSF2RB,ERAS,HCK,LYN,PIK3C2A,PIK3C2B,PIK3CB,PIK3R3,PIK3R5,RASD1,SOS1
Nitric Oxide Signaling in the Cardiovascular System	2.68	0.195	-0.943	ADRB3,ATP2A1,BDKRB2,CACNA1A,CACNA1D,CACNA2D2,CACNA2D3,CACNB1,CACNB2,FLT1,GUCY1A1,NPR1,PDE2A,PIK3C2A,PIK3C2B,PIK3CB,PIK3R3,PIK3R5,PRKCH,PRKCI,PRKCZ,PRKD1,PRKG2
Agranulocyte Adhesion and Diapedesis	2.62	0.168	#NUM!	ACTA2,CCL17,CCL19,CCL21,CCL25,CCL4,CCR9,CDH5,CLDN20,CLDN22,CLDN5,CLDN7,CXCL10,CXCL13,CXCL14,Cxcl15,CXCL3,Cxcl9,ITGA3,ITGA4,MMP12,MMP15,MMP17,MMP27,MMP3,MYL4,MYL6B,MYL7,MYO18A,MYO18B,MYO1H,MYO5C,PF4,PODXL2,Ppbp,SELPLG
FcγRIIB Signaling in B Lymphocytes	2.62	0.212	-0.333	CACNA1A,CACNA1D,CACNA1G,CACNA2D2,CACNA2D3,CACNB1,CACNB2,CD79A,ERAS,LYN,MAPK10,PIK3C2A,PIK3C2B,PIK3CB,PIK3R3,PIK3R5,RASD1,SOS1
IL-3 Signaling	2.58	0.215	-0.258	CSF2RB,ERAS,GAB2,IL3RA,PIK3C2A,PIK3C2B,PIK3CB,PIK3R3,PIK3R5,PRKCH,PRKCI,PRKCZ,PRKD1,PTPN6,RASD1,SOS1,STAT5A
Leukocyte Extravasation Signaling	2.56	0.171	0.392	ACTA2,Actn3,CDH5,CLDN20,CLDN22,CLDN5,CLDN7,EDIL3,ITGA3,ITGA4,MAPK10,MAPK11,MMP12,MMP15,MMP17,MMP27,MMP3,NCF1,NOX1,PIK3C2A,PIK3C2B,PIK3CB,PIK3R3,PIK3R5,PRKCH,PRKCI,PRKCZ,PRKD1,PTK2B,RAP1GAP,RAPGEF4,SELPLG,TEC
Renin-Angiotensin Signaling	2.53	0.19	0.471	ADCY1,AGT,AGTR2,ERAS,GUCY1A1,MAPK10,MAPK11,NOX1,PAK3,PIK3C2A,PIK3C2B,PIK3CB,PIK3R3,PIK3R5,PRKCH,PRKCI,PRKCZ,PRKD1,PTK2B,PTPN6,RASD1,SHE,SOS1
Glycogen Degradation II	2.49	0.455	0.447	MTAP,PGM1,PGM3,PGM5,PYGM
Role of Tissue Factor in Cancer	2.48	0.191	#NUM!	CSF2,ERAS,F2,F2RL1,GNA14,GNA15,HCK,ITGA3,LIMK1,LIMK2,LYN,MAPK11,PIK3C2A,PIK3C2B,PIK3CB,PIK3R3,PIK3R5,PTK2B,RASD1,RPS6KA2,RPS6KA4,STAT5A
Apelin Liver Signaling Pathway	2.43	0.308	1.414	AGT,APLN,COL10A1,COL11A2,COL2A1,COL5A3,EDN1,MAPK10
Hepatic Fibrosis Signaling Pathway	2.4	0.146	0.137	ACTA2,AGT,Agtr1b,CACNA1A,CACNA1D,CACNA2D2,CACNA2D3,CACNB1,CACNB2,CNR1,COL10A1,COL11A2,COL2A1,COL5A3,CREB3L4,EDN1,ERAS,FLT1,FZD9,GLI2,GLIS1,ITGA10,ITGA3,ITGA4,ITGA8,ITGB4,MAP2K6,MAP2K7,MAPK10,MAPK11,MYL4,MYL6B,MYL7,NCF1,NGFR,NOX1,PIK3C2A,PIK3C2B,PIK3CB,PIK3R3,PIK3R5,PRKCH,PRKCI,PRKCZ,PRKD1,PTCH1,PTCH2,RAC3,RASD1,RHOBTB2,SOS1,SPP1,TF,TIRAP,TNFRSF11B,TNFRSF1B,WNT10A,WNT10B,WNT2,WNT2B,WNT4
Type II Diabetes Mellitus Signaling	2.39	0.176	0	ADIPOQ,CACNA1A,CACNA1D,CACNA1G,CACNA2D2,CACNA2D3,CACNB1,CACNB2,CD36,MAFA,MAP2K7,MAPK10,NGFR,PIK3C2A,PIK3C2B,PIK3CB,PIK3R3,PIK3R5,PRKCH,PRKCI,PRKCZ,PRKD1,SLC27A3,SMPD4,SOCS7,TNFRSF11B,TNFRSF1B
Cell Cycle Control of Chromosomal Replication	2.39	0.232	1.387	CDC45,CDK17,CDK20,CHEK2,DBF4,MCM5,MCM8,MCM9,ORC1,ORC3,POLA1,POLD1,RPA1
Role of JAK1 and JAK3 in γc Cytokine Signaling	2.38	0.217	#NUM!	ERAS,FES,IL21R,IL2RA,IL2RG,IL7,JAK3,PIK3C2A,PIK3C2B,PIK3CB,PIK3R3,PIK3R5,PTK2B,RASD1,STAT5A
HGF Signaling	2.36	0.182	1.147	CDKN2A,ERAS,HGF,ITGA10,ITGA3,ITGA4,ITGA8,ITGB4,MAP2K7,MAP3K11,MAP3K15,MAPK10,MET,PIK3C2A,PIK3C2B,PIK3CB,PIK3R3,PIK3R5,PRKCH,PRKCI,PRKCZ,PRKD1,RASD1,SOS1
Regulation Of The Epithelial Mesenchymal Transition By Growth Factors Pathway	2.33	0.167	-0.192	CDH2,ERAS,FASLG,FGF1,FGF11,FGF12,FGF21,FGF9,GSC,HGF,JAK3,MAP2K6,MAP2K7,MAPK10,MAPK11,MET,NGFR,PARD6A,PARD6B,PIK3C2A,PIK3C2B,PIK3CB,PIK3R3,PIK3R5,RASD1,SMURF1,SOS1,TNFRSF11B,TNFRSF1B,TNFSF10,TNFSF8,TYK2
Role of CHK Proteins in Cell Cycle Checkpoint Control	2.32	0.228	-0.632	ATR,CHEK1,CHEK2,CLSPN,E2F2,E2F3,E2F7,HUS1,PLK1,PPM1L,PPP2R2B,RFC4,RPA1
Gα12/13 Signaling	2.31	0.18	1.706	CDH13,CDH17,CDH19,CDH2,CDH22,CDH5,ERAS,F2,F2RL1,F2RL2,LPAR3,MAP2K7,MAPK10,MYL4,MYL6B,MYL7,PIK3C2A,PIK3C2B,PIK3CB,PIK3R3,PIK3R5,PTK2B,RASD1,TEC
p53 Signaling	2.28	0.194	0.775	ATR,BIRC5,CCNK,CDKN2A,CHEK1,CHEK2,HDAC9,HIPK2,PIK3C2A,PIK3C2B,PIK3CB,PIK3R3,PIK3R5,PML,PRKDC,RPRM,TIGAR,TP63,TRIM29
Insulin Secretion Signaling Pathway	2.28	0.155	2.667	ADCY1,Arxes1/Arxes2,CACNA1A,CACNA1D,CACNA1G,CACNA2D2,CACNA2D3,CACNB1,CACNB2,CAMK2A,CPE,CREB3L4,GNA14,GNA15,GPAA1,GUCY1A1,HCK,JAK3,LYN,MAFA,MAPK11,NALCN,NOTUM,PC,PCSK2,PIK3C2A,PIK3C2B,PIK3CB,PIK3R3,PIK3R5,PRKCH,PRKCI,PRKCZ,PRKD1,RAPGEF4,SCNN1B,SLC2A3,SLC2A8,SRP68,STAT5A,STX1B,TYK2
Xenobiotic Metabolism Signaling	2.28	0.153	#NUM!	ABCB1,AHRR,ALDH1A3,ALDH5A1,CAMK2A,CHST11,CHST12,CHST15,CHST2,CHST3,CYP1B1,CYP2B6,ERAS,FMO3,GAL3ST2,GSTA3,GSTM2,Gstm6,GSTT2/GSTT2B,HS6ST3,MAP2K6,MAP2K7,MAP3K11,MAP3K15,MAPK11,MGMT,MGST2,NDST2,PIK3C2A,PIK3C2B,PIK3CB,PIK3R3,PIK3R5,PPARGC1A,PPM1L,PPP2R2B,PRKCH,PRKCI,PRKCZ,PRKD1,RASD1,SMOX,UGT1A4,UGT1A6
Growth Hormone Signaling	2.26	0.211	1.291	A2M,PIK3C2A,PIK3C2B,PIK3CB,PIK3R3,PIK3R5,PRKCH,PRKCI,PRKCZ,PRKD1,PTPN6,RPS6KA2,RPS6KA4,SOCS7,STAT5A
IL-15 Production	2.25	0.183	1.706	CSF2RA,DYRK3,EPHA5,FES,FLT1,HCK,JAK3,LMTK3,LYN,MAP2K6,MAP2K7,MAP3K11,MET,MUSK,PRKCI,PRKCZ,PTK2B,RET,ROR1,TEC,TYK2,TYRO3
Basal Cell Carcinoma Signaling	2.2	0.208	-0.632	BMP7,BMP8A,FZD9,GLI2,GLIS1,HHIP,PTCH1,PTCH2,STK36,SUFU,WNT10A,WNT10B,WNT2,WNT2B,WNT4
FGF Signaling	2.18	0.198	1.5	CREB3L4,FGF1,FGF11,FGF12,FGF21,FGF9,HGF,MAP2K6,MAPK11,MET,PIK3C2A,PIK3C2B,PIK3CB,PIK3R3,PIK3R5,PTPN6,SOS1
ERBB Signaling	2.18	0.194	0.258	AREG,ERAS,EREG,MAP2K6,MAPK10,MAPK11,PAK3,PIK3C2A,PIK3C2B,PIK3CB,PIK3R3,PIK3R5,PRKCH,PRKCI,PRKCZ,PRKD1,RASD1,SOS1
CXCR4 Signaling	2.15	0.168	0.471	ADCY1,CD4,ERAS,GNA14,GNA15,GNAO1,GNG13,GNG4,GNG7,GUCY1A1,LYN,MAPK10,MYL4,MYL6B,MYL7,PAK3,PIK3C2A,PIK3C2B,PIK3CB,PIK3R3,PIK3R5,PRKCH,PRKCI,PRKCZ,PRKD1,RAC3,RASD1,RHOBTB2
γ-glutamyl Cycle	2.13	0.385	0.447	CHAC1,CHAC2,GGT1,GGT7,GSS
GNRH Signaling	2.11	0.162	1.414	ADCY1,CACNA1A,CACNA1D,CACNA1G,CACNA2D2,CACNA2D3,CACNB1,CACNB2,CAMK2A,CREB3L4,ERAS,GNA14,GNA15,GNG13,GNG4,GNG7,GUCY1A1,MAP2K6,MAP2K7,MAP3K11,MAP3K15,MAPK10,MAPK11,PAK3,PRKCH,PRKCI,PRKCZ,PRKD1,PTK2B,RASD1,SOS1
Coagulation System	2.1	0.257	0.333	A2M,BDKRB2,F12,F13A1,F2,F5,F8,SERPINA1,SERPINF2
IL-9 Signaling	2.1	0.257	0	CISH,IL2RG,JAK3,PIK3C2A,PIK3C2B,PIK3CB,PIK3R3,PIK3R5,STAT5A
PAK Signaling	2.07	0.179	0.5	ERAS,ITGA10,ITGA3,ITGA4,ITGA8,ITGB4,LIMK1,LIMK2,MAPK10,MYL4,MYL6B,MYL7,PAK3,PIK3C2A,PIK3C2B,PIK3CB,PIK3R3,PIK3R5,PTK2B,RASD1,SOS1
IL-2 Signaling	2.06	0.213	-0.905	ERAS,IL2RA,IL2RG,JAK3,PIK3C2A,PIK3C2B,PIK3CB,PIK3R3,PIK3R5,PTK2B,RASD1,SOS1,STAT5A
Tight Junction Signaling	2.03	0.163	#NUM!	ACTA2,CLDN20,CLDN22,CLDN5,CLDN7,CSTF1,CSTF2,CSTF3,F2RL2,GPAA1,MYL4,MYL6B,MYL7,MYO18A,MYO18B,MYO1H,MYO5C,NECTIN2,NGFR,PARD6A,PATJ,PPM1L,PPP2R2B,PRKCI,PRKCZ,SMURF1,STX1B,TNFRSF11B,TNFRSF1B
Macropinocytosis Signaling	1.98	0.197	0.905	CD14,ERAS,HGF,ITGB4,MET,PIK3C2A,PIK3C2B,PIK3CB,PIK3R3,PIK3R5,PRKCH,PRKCI,PRKCZ,PRKD1,RASD1
Regulation of the Epithelial-Mesenchymal Transition Pathway	1.98	0.159	#NUM!	CDH2,ERAS,FGF1,FGF11,FGF12,FGF21,FGF9,FZD9,GSC,HGF,JAK3,MAP2K6,MAP2K7,MET,NOTCH4,PARD6A,PARD6B,PIK3C2A,PIK3C2B,PIK3CB,PIK3R3,PIK3R5,RASD1,SMURF1,SOS1,TYK2,WNT10A,WNT10B,WNT2,WNT2B,WNT4
Semaphorin Neuronal Repulsive Signaling Pathway	1.98	0.168	0.209	Acan,FARP2,FES,GUCY1A1,ITGA10,ITGA3,ITGA4,ITGA8,ITGB4,LIMK1,LIMK2,MAP2K6,MAP2K7,MYL4,MYL6B,MYL7,PAK3,PDE4C,Pde4d,PIK3C2A,PIK3C2B,PIK3CB,PIK3R3,PIK3R5,PRKG2
Flavin Biosynthesis IV (Mammalian)	1.97	1	#NUM!	FLAD1,RFK
Wound Healing Signaling Pathway	1.96	0.151	0.649	ACTA2,COL10A1,COL11A1,COL11A2,COL13A1,COL24A1,COL25A1,COL26A1,COL2A1,COL5A3,COL6A5,COL7A1,COL9A1,COL9A2,COL9A3,CSF2,ERAS,F2,FASLG,IFNGR2,IL12A,Il31,ITGA3,ITGB4,LAMA1,LAMA3,MAP2K6,MAP2K7,MAPK10,NGFR,PF4,RASD1,SOS1,TNFRSF11B,TNFRSF1B,TNFSF10,TNFSF8,TYK2
Endocannabinoid Developing Neuron Pathway	1.96	0.173	1.5	ADCY1,CNR1,CREB3L4,ERAS,GNAO1,GNG13,GNG4,GNG7,GUCY1A1,MAP2K6,MAP2K7,MAPK10,MAPK11,PIK3C2A,PIK3C2B,PIK3CB,PIK3R3,PIK3R5,RAC3,RAP1GAP,RASD1,STMN2
Xenobiotic Metabolism General Signaling Pathway	1.96	0.169	1.043	ERAS,GSTA3,GSTM2,Gstm6,GSTT2/GSTT2B,MAP2K6,MAP2K7,MAP3K11,MAP3K15,MAPK11,MGST2,NR1H4,PIK3C2A,PIK3C2B,PIK3CB,PIK3R3,PIK3R5,PRKCH,PRKCI,PRKCZ,PRKD1,RASD1,UGT1A4,UGT1A6
Th1 Pathway	1.94	0.175	1.091	CD28,CD4,CD86,HLA-A,HLA-DMB,HLA-DQA1,HLA-DQB1,IFNGR2,IL12A,IL12RB1,IL27,IL27RA,JAK3,MAP2K6,NOTCH4,PIK3C2A,PIK3C2B,PIK3CB,PIK3R3,PIK3R5,TYK2
IL-4 Signaling	1.94	0.187	#NUM!	ERAS,HLA-A,HLA-DMB,HLA-DQA1,HLA-DQB1,IL2RG,IRF4,JAK3,PIK3C2A,PIK3C2B,PIK3CB,PIK3R3,PIK3R5,PTPN6,RASD1,SOS1,TYK2
Granulocyte Adhesion and Diapedesis	1.92	0.159	#NUM!	CCL17,CCL19,CCL21,CCL25,CCL4,CCR9,CDH5,CLDN20,CLDN22,CLDN5,CLDN7,CSF3,CXCL10,CXCL13,CXCL14,Cxcl15,CXCL3,Cxcl9,ITGA4,MMP12,MMP15,MMP17,MMP27,MMP3,NGFR,PF4,Ppbp,SELPLG,TNFRSF11B,TNFRSF1B
Chronic Myeloid Leukemia Signaling	1.91	0.179	#NUM!	CBLC,CDKN2A,E2F2,E2F3,E2F7,ERAS,GAB2,HDAC9,MECOM,PIK3C2A,PIK3C2B,PIK3CB,PIK3R3,PIK3R5,RASD1,RBL1,SOS1,STAT5A,SUV39H1
Role of NFAT in Cardiac Hypertrophy	1.91	0.154	0.784	ADCY1,AKAP5,CACNA1A,CACNA1D,CACNA1G,CACNA2D2,CACNA2D3,CACNB1,CACNB2,CAMK2A,CTF1,ERAS,GNG13,GNG4,GNG7,GUCY1A1,HDAC9,MAP2K6,MAP2K7,MAPK10,MAPK11,NOTUM,PIK3C2A,PIK3C2B,PIK3CB,PIK3R3,PIK3R5,PRKCH,PRKCI,PRKCZ,PRKD1,RASD1,SLC8A2,SOS1
Apelin Cardiomyocyte Signaling Pathway	1.9	0.182	1.886	APLN,ATP2A1,MAPK10,MAPK11,MYL4,MYL6B,MYL7,NOTUM,PIK3C2A,PIK3C2B,PIK3CB,PIK3R3,PIK3R5,PRKCH,PRKCI,PRKCZ,PRKD1,SLC8A2
HIF1α Signaling	1.89	0.155	1.616	ADRA1B,CAMK2A,EDN1,ERAS,FLT1,HGF,HIF1AN,MAP2K6,MAP2K7,MET,MMP12,MMP15,MMP17,MMP27,MMP3,NCF1,NOX1,PIK3C2A,PIK3C2B,PIK3CB,PIK3R3,PIK3R5,PRKCH,PRKCI,PRKCZ,PRKD1,RAC3,RASD1,RORC,SLC2A3,SLC2A8,TF
G Beta Gamma Signaling	1.88	0.171	0	ADCY1,CACNA1A,CACNA1D,CACNA1G,CACNA2D2,CACNA2D3,CACNB1,CACNB2,CAV2,ERAS,GNA14,GNA15,GNAO1,GNG13,GNG4,GNG7,PRKCH,PRKCI,PRKCZ,PRKD1,RASD1,SOS1
IL-7 Signaling Pathway	1.88	0.192	0	HGF,Igha,IL2RG,IL7,JAK3,LYN,MAPK11,MET,PIK3C2A,PIK3C2B,PIK3CB,PIK3R3,PIK3R5,SOS1,STAT5A
α-Adrenergic Signaling	1.87	0.178	0.707	ADCY1,ADRA1A,ADRA2A,ERAS,GNA14,GNA15,GNAO1,GNG13,GNG4,GNG7,GUCY1A1,GYS1,PRKCH,PRKCI,PRKCZ,PRKD1,PYGM,RASD1,SLC8A2
Paxillin Signaling	1.87	0.178	-0.277	ACTA2,Actn3,ERAS,ITGA10,ITGA3,ITGA4,ITGA8,ITGB4,MAPK10,MAPK11,PAK3,PIK3C2A,PIK3C2B,PIK3CB,PIK3R3,PIK3R5,PTK2B,RASD1,SOS1
Endothelin-1 Signaling	1.86	0.157	0.2	ADCY1,CASP7,ECE2,EDN1,EDNRB,ERAS,GNA14,GNA15,GNAO1,GUCY1A1,MAPK10,MAPK11,NOTUM,NPR1,PIK3C2A,PIK3C2B,PIK3CB,PIK3R3,PIK3R5,PLA2G5,PLA2G7,PLD2,PLD4,PRKCH,PRKCI,PRKCZ,PRKD1,RASD1,SHE,SOS1
Thrombin Signaling	1.85	0.152	0.471	ADCY1,ARHGEF15,ARHGEF18,ARHGEF9,CAMK2A,ERAS,F2,F2RL2,GATA5,GNA14,GNA15,GNAO1,GNG13,GNG4,GNG7,GUCY1A1,MAPK11,MYL4,MYL6B,MYL7,NOTUM,PIK3C2A,PIK3C2B,PIK3CB,PIK3R3,PIK3R5,PRKCH,PRKCI,PRKCZ,PRKD1,RAC3,RASD1,RHOBTB2,SOS1
MSP-RON Signaling Pathway	1.84	0.207	#NUM!	ACTA2,CSF2RB,F12,IL12A,IL3RA,PIK3C2A,PIK3C2B,PIK3CB,PIK3R3,PIK3R5,PRKCZ,RPS6KA2
Prolactin Signaling	1.84	0.186	0	ERAS,KCNMA1,NMI,PIK3C2A,PIK3C2B,PIK3CB,PIK3R3,PIK3R5,PRKCH,PRKCI,PRKCZ,PRKD1,RASD1,SOCS7,SOS1,STAT5A
Oxytocin Signaling Pathway	1.84	0.146	1.093	CACNA1A,CACNA1D,CACNA2D2,CACNA2D3,CACNB1,CACNB2,CCDC51,CD36,CREB3L4,ERAS,GNAO1,GNG13,GNG4,GNG7,GUCY1A1,HSPB2,MAPK10,MAPK11,MFN2,MYL4,MYL6B,MYL7,MYO18A,MYO18B,MYO1H,MYO5C,NPR1,PIK3C2A,PIK3C2B,PIK3CB,PIK3R3,PIK3R5,PLA2G5,PRKCH,PRKCI,PRKCZ,PRKD1,PRKG2,RASD1,SMARCC2,SOS1
Reelin Signaling in Neurons	1.83	0.167	0.655	ARHGEF15,ARHGEF18,ARHGEF9,CAMK2A,CDH2,CNR1,GRIN2D,HCK,ITGA3,LIMK1,LRP8,LYN,MAP2K6,MAP2K7,MAP3K11,MAPK10,PAFAH1B3,PDK3,PIK3C2A,PIK3C2B,PIK3CB,PIK3R3,PIK3R5
Gαq Signaling	1.82	0.16	0.426	ADRA1A,ADRA1B,Agtr1b,AVPR1A,GNA14,GNA15,GNAO1,GNG13,GNG4,GNG7,GYS1,PIK3C2A,PIK3C2B,PIK3CB,PIK3R3,PIK3R5,PLD2,PLD4,PRKCH,PRKCI,PRKCZ,PRKD1,PTK2B,RAC3,RGS18,RGS7,RHOBTB2
Acute Phase Response Signaling	1.81	0.157	-0.775	A2M,AGT,AHSG,C3,C4A/C4B,CRABP1,CRABP2,ERAS,F2,F8,ITIH2,ITIH3,ITIH4,MAP2K6,MAP2K7,MAPK11,NGFR,PIK3CB,PIK3R3,RASD1,Saa3,SERPINA1,SERPINA3,SERPINF2,SOCS7,SOS1,TF,TNFRSF11B,TNFRSF1B
UVB-Induced MAPK Signaling	1.8	0.212	0.632	MAPK10,MAPK11,PIK3C2A,PIK3C2B,PIK3CB,PIK3R3,PIK3R5,PRKCH,PRKCI,PRKCZ,PRKD1
p70S6K Signaling	1.77	0.167	0	AGT,CD79A,ERAS,F2,F2RL1,F2RL2,IL2RG,LYN,NOTUM,PIK3C2A,PIK3C2B,PIK3CB,PIK3R3,PIK3R5,PPM1L,PPP2R2B,PRKCH,PRKCI,PRKCZ,PRKD1,RASD1,SOS1
NAD Biosynthesis from 2-amino-3-carboxymuconate Semialdehyde	1.76	0.5	#NUM!	NADSYN1,NMNAT1,Nmnat3
Cardiac Hypertrophy Signaling	1.75	0.147	1	ADCY1,ADRA1A,ADRA1B,ADRA2A,ADRB3,CACNA1A,CACNA1D,CACNA2D2,CACNA2D3,CACNB1,CACNB2,ERAS,GNA14,GNA15,GNAO1,GNG13,GNG4,GNG7,GUCY1A1,MAP2K6,MAP2K7,MAP3K11,MAP3K15,MAPK10,MAPK11,MYL4,MYL6B,MYL7,NOTUM,PIK3C2A,PIK3C2B,PIK3CB,PIK3R3,PIK3R5,RAC3,RASD1,RHOBTB2,SOS1
Pancreatic Adenocarcinoma Signaling	1.75	0.168	0.832	BIRC5,BRCA2,CCNE2,CDKN2A,CYP2E1,E2F2,E2F3,E2F7,HDAC9,JAK3,MAPK10,PIK3C2A,PIK3C2B,PIK3CB,PIK3R3,PIK3R5,PLD2,PLD4,RBL1,SUV39H1,TYK2
Kinetochore Metaphase Signaling Pathway	1.75	0.173	1.291	BIRC5,CDC20,CENPL,CENPO,CENPQ,CENPU,DSN1,KNL1,MASTL,NEK2,NUF2,PLK1,PPP1R14C,PPP1R3D,SKA3,SMC1B,SPDL1,ZW10,ZWILCH
Xenobiotic Metabolism CAR Signaling Pathway	1.75	0.155	-0.186	ABCB1,ALDH1A3,ALDH5A1,CHST11,CHST12,CHST15,CHST2,CHST3,CYP2B6,FMO3,GAL3ST2,GSTA3,GSTM2,Gstm6,GSTT2/GSTT2B,HS6ST3,MAP2K6,MAP2K7,MGST2,NDST2,PPARGC1A,PPM1L,PPP2R2B,PRKCH,PRKCI,PRKCZ,PRKD1,UGT1A4,UGT1A6
Actin Cytoskeleton Signaling	1.75	0.148	0.218	ACTA2,Actn3,CD14,ERAS,F2,FGF1,FGF11,FGF12,FGF21,FGF9,ITGA10,ITGA3,ITGA4,ITGA8,ITGB4,LIMK1,LIMK2,MYL4,MYL6B,MYL7,MYO18A,MYO18B,MYO1H,MYO5C,PAK3,PFN2,PIK3C2A,PIK3C2B,PIK3CB,PIK3R3,PIK3R5,RAC3,RASD1,SOS1,SSH1,TIAM2
CCR3 Signaling in Eosinophils	1.74	0.165	0.905	ERAS,GNA14,GNA15,GNAO1,GNG13,GNG4,GNG7,LIMK1,LIMK2,MAPK11,PAK3,PIK3C2A,PIK3C2B,PIK3CB,PIK3R3,PIK3R5,PLA2G5,PRKCH,PRKCI,PRKCZ,PRKD1,RASD1
Fc Epsilon RI Signaling	1.73	0.169	1	CSF2,ERAS,LYN,MAP2K6,MAP2K7,MAPK10,MAPK11,PIK3C2A,PIK3C2B,PIK3CB,PIK3R3,PIK3R5,PLA2G5,PRKCH,PRKCI,PRKCZ,PRKD1,RAC3,RASD1,SOS1
GPCR-Mediated Nutrient Sensing in Enteroendocrine Cells	1.73	0.169	0.688	ADCY1,CACNA1A,CACNA1D,CACNA1G,CACNA2D2,CACNA2D3,CACNB1,CACNB2,GNA14,GNA15,GNG13,GNG4,GNG7,GUCY1A1,NOTUM,PRKCH,PRKCI,PRKCZ,PRKD1,RAPGEF4
Virus Entry via Endocytic Pathways	1.69	0.173	#NUM!	ACTA2,AP1B1,CXADR,ERAS,HLA-A,ITGB4,PIK3C2A,PIK3C2B,PIK3CB,PIK3R3,PIK3R5,PRKCH,PRKCI,PRKCZ,PRKD1,RAC3,RASD1,ZBTB12
nNOS Signaling in Neurons	1.69	0.213	#NUM!	CAMK2A,CAPN6,CAPN7,DLG2,GRIN2D,PRKCH,PRKCI,PRKCZ,PRKD1,RASD1
Production of Nitric Oxide and Reactive Oxygen Species in Macrophages	1.66	0.153	0.6	IFNGR2,JAK3,MAP2K7,MAP3K11,MAP3K15,MAPK10,MAPK11,NCF1,NGFR,PIK3C2A,PIK3C2B,PIK3CB,PIK3R3,PIK3R5,PPM1L,PPP1R14C,PPP1R3D,PPP2R2B,PRKCH,PRKCI,PRKCZ,PRKD1,PTPN6,RAC3,RHOBTB2,SERPINA1,TNFRSF11B,TNFRSF1B,TYK2
Ceramide Signaling	1.66	0.178	-0.832	CERK,ERAS,NGFR,PIK3C2A,PIK3C2B,PIK3CB,PIK3R3,PIK3R5,PPM1L,PPP2R2B,PRKCZ,RASD1,S1PR1,SMPD4,TNFRSF11B,TNFRSF1B
Intrinsic Prothrombin Activation Pathway	1.65	0.22	1	COL10A1,COL11A2,COL2A1,COL5A3,F12,F13A1,F2,F5,F8
Nicotine Degradation III	1.63	0.2	0.302	ADH7,AOX1,Aox2,CYP1B1,CYP2B6,CYP2E1,CYP2F1,CYP51A1,LARGE2,UGT1A4,UGT1A6
Synaptogenesis Signaling Pathway	1.62	0.14	1.298	ADCY1,AP1B1,CACNA2D2,CACNB1,CACNB2,CADM1,CAMK2A,CDH13,CDH17,CDH19,CDH2,CDH22,CDH5,CREB3L4,EFNB3,EPHA5,ERAS,GPAA1,GRIA4,GRIN2D,GRM6,GUCY1A1,HCK,LIMK1,LRP8,LYN,NRXN1,NRXN2,PIK3C2A,PIK3C2B,PIK3CB,PIK3R3,PIK3R5,RASD1,RASGRP2,SHE,SNCA,SNCG,SOS1,STX1B,STXBP5,SYT12,SYT15,THBS4
Antiproliferative Role of Somatostatin Receptor 2	1.59	0.182	-0.378	ERAS,GNG13,GNG4,GNG7,GUCY1A1,NPR1,PIK3C2A,PIK3C2B,PIK3CB,PIK3R3,PIK3R5,PTPN6,RASD1,SMARCC2
Sonic Hedgehog Signaling	1.59	0.241	1.89	GLI2,GLIS1,HHIP,PTCH1,PTCH2,STK36,SUFU
Nicotine Degradation II	1.57	0.19	0.577	ADH7,AOX1,Aox2,CYP1B1,CYP2B6,CYP2E1,CYP2F1,CYP51A1,FMO3,LARGE2,UGT1A4,UGT1A6
CNTF Signaling	1.57	0.196	1	ERAS,PIK3C2A,PIK3C2B,PIK3CB,PIK3R3,PIK3R5,RASD1,RPS6KA2,RPS6KA4,SOS1,TYK2
White Adipose Tissue Browning Pathway	1.57	0.159	0.894	ADCY1,ADRB3,BMP7,CACNA1A,CACNA1D,CACNA1G,CACNA2D2,CACNA2D3,CACNB1,CACNB2,CREB3L4,FGF21,FNDC5,GUCY1A1,HIF1AN,LDHD,MAPK11,NPR1,PPARGC1A,PRDM16,PRKG2,SLC16A1
LPS-stimulated MAPK Signaling	1.56	0.176	0.577	CD14,ERAS,MAP2K6,MAPK10,MAPK11,PIK3C2A,PIK3C2B,PIK3CB,PIK3R3,PIK3R5,PRKCH,PRKCI,PRKCZ,PRKD1,RASD1
Glioma Signaling	1.55	0.163	0.302	CAMK2A,CDKN2A,E2F2,E2F3,E2F7,ERAS,HDAC9,PIK3C2A,PIK3C2B,PIK3CB,PIK3R3,PIK3R5,PRKCH,PRKCI,PRKCZ,PRKD1,RASD1,RBL1,SOS1,SUV39H1
Glutathione-mediated Detoxification	1.55	0.222	0	GSTA3,GSTM2,Gstm6,GSTT2/GSTT2B,Gstt3,MGST2,NAT8,NAT8B
Hematopoiesis from Multipotent Stem Cells	1.54	0.333	#NUM!	CSF2,CSF3,IL7,THPO
MSP-RON Signaling In Macrophages Pathway	1.53	0.164	0	ARG1,CREB3L4,ERAS,F12,GAB2,HLA-DMB,HLA-DQA1,HLA-DQB1,IFNGR2,IL12A,PIK3C2A,PIK3C2B,PIK3CB,PIK3R3,PIK3R5,PRKCZ,RASD1,SOS1,ST14
Opioid Signaling Pathway	1.51	0.14	0.898	ADCY1,AP1B1,CACNA1A,CACNA1D,CACNA1G,CACNA2D2,CACNA2D3,CACNB1,CACNB2,CAMK2A,CREB3L4,ERAS,GNA14,GNA15,GNAO1,GNG13,GNG4,GNG7,GRIN2D,GRK6,GUCY1A1,HCK,LYN,MAP2K6,MAP2K7,PLD2,PRKCH,PRKCI,PRKCZ,PRKD1,RAC3,RASD1,RGS11,RGS18,RGS5,RGS7,RPS6KA2,RPS6KA4,SOS1
Dilated Cardiomyopathy Signaling Pathway	1.5	0.155	-1.069	ACTA2,ADCY1,CACNA1A,CACNA1D,CACNA1G,CACNA2D2,CACNA2D3,CACNB1,CACNB2,CAMK2A,DES,GUCY1A1,MAPK11,MYL4,MYL6B,MYL7,MYO18A,MYO18B,MYO1H,MYO5C,PDE2A,TNNI2,TNNT2
Cellular Effects of Sildenafil (Viagra)	1.5	0.155	#NUM!	ACTA2,ADCY1,CACNA1A,CACNA1D,CACNA2D2,CACNA2D3,CACNB1,CACNB2,GUCY1A1,KCNH2,MYL4,MYL6B,MYL7,MYO18A,MYO18B,MYO1H,MYO5C,NOTUM,NPR1,PDE2A,PDE4C,PRKG2,SLC4A11
RHOGDI Signaling	1.48	0.146	0.447	ACTA2,ARHGDIG,ARHGEF15,ARHGEF18,ARHGEF9,CDH13,CDH17,CDH19,CDH2,CDH22,CDH5,DGKZ,GNA14,GNA15,GNAO1,GNG13,GNG4,GNG7,ITGA10,ITGA3,ITGA4,ITGA8,ITGB4,LIMK1,LIMK2,MYL4,MYL6B,MYL7,PAK3,RAC3,RHOBTB2
Natural Killer Cell Signaling	1.48	0.147	0.186	COL10A1,COL11A2,COL2A1,COL5A3,ERAS,FASLG,HLA-A,IL12A,IL12RB1,JAK3,LIMK1,LIMK2,MAP3K11,MAP3K15,MAPK11,NECTIN2,PAK3,PIK3C2A,PIK3C2B,PIK3CB,PIK3R3,PIK3R5,PTK2B,PTPN6,RAC3,RASD1,SOS1,TNFSF10,TYK2
ERB2-ERBB3 Signaling	1.48	0.185	0	ERAS,ETV4,JAK3,PIK3C2A,PIK3C2B,PIK3CB,PIK3R3,PIK3R5,RASD1,SOS1,STAT5A,TYK2
Apelin Endothelial Signaling Pathway	1.48	0.156	0.535	ADCY1,APLN,AQP2,ERAS,GNA14,GNA15,GNAO1,GNG13,GNG4,GNG7,GUCY1A1,MAPK10,PIK3C2A,PIK3C2B,PIK3CB,PIK3R3,PIK3R5,PRKCH,PRKCI,PRKCZ,PRKD1,RASD1
Xenobiotic Metabolism PXR Signaling Pathway	1.47	0.148	-0.378	ABCB1,ALDH1A3,ALDH5A1,CAMK2A,CHST11,CHST12,CHST15,CHST2,CHST3,CYP2B6,GAL3ST2,GSTA3,GSTM2,Gstm6,GSTT2/GSTT2B,HS6ST3,MGST2,NDST2,PPARGC1A,PPP1R14C,PPP1R3D,PRKCH,PRKCI,PRKCZ,PRKD1,SMOX,UGT1A4,UGT1A6
BER (Base Excision Repair) Pathway	1.47	0.205	1	CDKN2A,MAP2K6,MAP2K7,NEIL2,RFC4,RPA1,SMUG1,UNG,XRCC1
UVC-Induced MAPK Signaling	1.46	0.196	0.816	ATR,ERAS,MAPK10,MAPK11,PRKCH,PRKCI,PRKCZ,PRKD1,RASD1,SMPD4
Role of BRCA1 in DNA Damage Response	1.46	0.175	0.905	ATR,BRCA2,CHEK1,CHEK2,E2F2,E2F3,E2F7,FAAP100,FANCD2,PLK1,RBL1,RFC4,RPA1,SMARCC2
LPS/IL-1 Mediated Inhibition of RXR Function	1.44	0.141	-1.732	ABCB1,ABCC4,ALDH1A3,ALDH5A1,CD14,CHST11,CHST12,CHST15,CHST2,CHST3,CPT1B,CPT1C,CYP2B6,Cyp2c23,CYP2E1,CYP2F1,FABP4,FMO3,GAL3ST2,GSTA3,GSTM2,Gstm6,GSTT2/GSTT2B,HS6ST3,MAP2K7,MGMT,MGST2,NDST2,NGFR,NR1H4,PPARGC1A,SLC27A3,SMOX,TNFRSF11B,TNFRSF1B
Role of NANOG in Mammalian Embryonic Stem Cell Pluripotency	1.43	0.16	0	BMP7,BMP8A,ERAS,FZD9,JAK3,PIK3C2A,PIK3C2B,PIK3CB,PIK3R3,PIK3R5,RASD1,SMAD9,SOS1,TYK2,WNT10A,WNT10B,WNT2,WNT2B,WNT4
Pulmonary Healing Signaling Pathway	1.43	0.146	-0.928	CSF2,ERAS,FZD9,HCK,LYN,MAPK10,MAPK11,MMP12,MMP15,MMP17,MMP27,MMP3,NGFR,NOTCH4,PRKCH,PRKCI,PRKCZ,PRKD1,RASD1,SMAD9,SOS1,STAT5A,TNFRSF11B,TNFRSF1B,WNT10A,WNT10B,WNT2,WNT2B,WNT4
FLT3 Signaling in Hematopoietic Progenitor Cells	1.42	0.173	0.905	CREB3L4,ERAS,GAB2,MAPK11,PIK3C2A,PIK3C2B,PIK3CB,PIK3R3,PIK3R5,RASD1,RPS6KA2,RPS6KA4,SOS1,STAT5A
STAT3 Pathway	1.42	0.156	0	CISH,CSF2RB,ERAS,FLT1,HGF,IL12RB1,IL13RA2,IL21R,IL22RA2,IL27RA,IL2RA,IL2RG,IL3RA,MAP3K11,MAPK10,MAPK11,NGFR,PTPN6,RASD1,SOCS7,TYK2
Th2 Pathway	1.42	0.156	0.5	CD28,CD4,CD86,HLA-A,HLA-DMB,HLA-DQA1,HLA-DQB1,IL12A,IL12RB1,IL2RA,IL2RG,JAK3,NOTCH4,PIK3C2A,PIK3C2B,PIK3CB,PIK3R3,PIK3R5,S1PR1,STAT5A,TYK2
Corticotropin Releasing Hormone Signaling	1.42	0.152	0.447	ADCY1,CACNA1A,CACNA1D,CACNA1G,CACNA2D2,CACNA2D3,CACNB1,CACNB2,CNR1,CREB3L4,FASLG,GLI2,GNAO1,GUCY1A1,MAPK11,NPR1,PRKCH,PRKCI,PRKCZ,PRKD1,PTCH1,PTCH2,SMARCC2
JAK/STAT Signaling	1.38	0.171	0.577	CISH,ERAS,JAK3,PIK3C2A,PIK3C2B,PIK3CB,PIK3R3,PIK3R5,PTPN6,RASD1,SOCS7,SOS1,STAT5A,TYK2
PCP (Planar Cell Polarity) Pathway	1.37	0.183	-0.632	CTHRC1,FZD9,MAPK10,NDP,PFN2,RSPO3,WNT10A,WNT10B,WNT2,WNT2B,WNT4
Germ Cell-Sertoli Cell Junction Signaling	1.36	0.148	#NUM!	A2M,ACTA2,Actn3,CDH2,ERAS,ITGA3,LIMK1,LIMK2,MAP2K6,MAP2K7,MAP3K11,MAP3K15,MAPK10,NECTIN2,PAK3,PIK3C2A,PIK3C2B,PIK3CB,PIK3R3,PIK3R5,PLS1,RAC3,RASD1,RHOBTB2,TUBB4A
Heparan Sulfate Biosynthesis (Late Stages)	1.36	0.173	-0.277	CHST11,CHST12,CHST15,CHST2,CHST3,EXTL1,GAL3ST2,HS6ST3,NDST2,NOTUM,PLA1A,PNPLA7,TARS2
IL-23 Signaling Pathway	1.36	0.196	0.707	CSF2,IL12RB1,PIK3C2A,PIK3C2B,PIK3CB,PIK3R3,PIK3R5,RORC,TYK2
Melanocyte Development and Pigmentation Signaling	1.35	0.163	0.832	ADCY1,CREB3L4,ERAS,GUCY1A1,MC1R,MITF,PIK3C2A,PIK3C2B,PIK3CB,PIK3R3,PIK3R5,PTPN6,RASD1,RPS6KA2,RPS6KA4,SOS1
Synaptic Long Term Depression	1.35	0.144	0.6	CACNA1A,CACNA1D,CACNA1G,CACNA2D2,CACNA2D3,CACNB1,CACNB2,ERAS,GNA14,GNA15,GNAO1,GRIA4,GRM6,GUCY1A1,LYN,NOTUM,NPR1,PLA2G5,PLA2G7,PPM1L,PPP2R2B,PRKCH,PRKCI,PRKCZ,PRKD1,PRKG2,RASD1,SMARCC2
ERBB4 Signaling	1.34	0.176	0	ERAS,PIK3C2A,PIK3C2B,PIK3CB,PIK3R3,PIK3R5,PRKCH,PRKCI,PRKCZ,PRKD1,RASD1,SOS1
Cardiac β-adrenergic Signaling	1.34	0.146	0.277	ADCY1,AKAP5,ATP2A1,CACNA1A,CACNA1D,CACNA2D2,CACNA2D3,CACNB1,CACNB2,ENPP6,GNA14,GNA15,GNAO1,GNG13,GNG4,GNG7,GUCY1A1,PDE2A,PDE4C,PKIA,PPM1L,PPP1R14C,PPP1R3D,PPP2R2B,SLC8A2,SMPDL3B
Th1 and Th2 Activation Pathway	1.34	0.147	#NUM!	CD28,CD4,CD86,HLA-A,HLA-DMB,HLA-DQA1,HLA-DQB1,IFNGR2,IL12A,IL12RB1,IL27,IL27RA,IL2RA,IL2RG,JAK3,MAP2K6,NOTCH4,PIK3C2A,PIK3C2B,PIK3CB,PIK3R3,PIK3R5,S1PR1,STAT5A,TYK2
RAR Activation	1.33	0.143	#NUM!	ADCY1,ADH7,Akr1b10,Akr1c12/Akr1c13,Akr1cl,ALDH1A3,CARM1,CRABP1,CRABP2,CSF2RB,ERCC2,GUCY1A1,IL3RA,LRAT,MAPK10,MAPK11,PIK3CB,PIK3R3,PML,PPARGC1A,PRKCH,PRKCI,PRKCZ,PRKD1,RDH11,SMAD9,SMARCC2,STAT5A,TRIM24
Acute Myeloid Leukemia Signaling	1.33	0.165	0.577	CSF2RA,CSF2RB,ERAS,MAP2K6,MAP2K7,PIK3C2A,PIK3C2B,PIK3CB,PIK3R3,PIK3R5,PIM2,PML,RASD1,SOS1,STAT5A
Crosstalk between Dendritic Cells and Natural Killer Cells	1.33	0.165	-1.155	ACTA2,CAMK2A,CD28,CD86,CSF2,CSF2RB,FASLG,FSCN2,HLA-A,IL12A,IL2RG,IL3RA,NECTIN2,TNFRSF1B,TNFSF10
Angiopoietin Signaling	1.32	0.171	0.447	ANGPT4,BIRC5,ERAS,GRB14,PAK3,PIK3C2A,PIK3C2B,PIK3CB,PIK3R3,PIK3R5,RASD1,SOS1,STAT5A
Tumor Microenvironment Pathway	1.32	0.145	1.177	ARG1,CSF2,CSF3,ERAS,FASLG,FGF1,FGF11,FGF12,FGF21,FGF9,HGF,HLA-A,MMP12,MMP15,MMP17,MMP27,MMP3,PIK3C2A,PIK3C2B,PIK3CB,PIK3R3,PIK3R5,RASD1,SLC16A1,SLC2A3,SPP1
Amyotrophic Lateral Sclerosis Signaling	1.31	0.157	0.577	ALS2,CACNA1A,CACNA1D,CACNA2D2,CACNA2D3,CACNB1,CACNB2,CAPN6,CAPN7,CASP7,GDNF,GRIA4,GRIN2D,PIK3C2A,PIK3C2B,PIK3CB,PIK3R3,PIK3R5
Bladder Cancer Signaling	1.31	0.157	0.447	CDKN2A,E2F2,E2F3,ERAS,FGF1,FGF11,FGF12,FGF21,FGF9,HDAC9,MMP12,MMP15,MMP17,MMP27,MMP3,RASD1,RBL1,SUV39H1
DNA Double-Strand Break Repair by Non-Homologous End Joining	1.31	0.286	#NUM!	LIG4,PRKDC,XRCC1,XRCC4
VEGF Family Ligand-Receptor Interactions	1.31	0.167	0	ERAS,FLT1,PIK3C2A,PIK3C2B,PIK3CB,PIK3R3,PIK3R5,PLA2G5,PRKCH,PRKCI,PRKCZ,PRKD1,RASD1,SOS1
fMLP Signaling in Neutrophils	1.3	0.153	0.577	ERAS,GNA14,GNA15,GNAO1,GNG13,GNG4,GNG7,NCF1,NOX1,PIK3C2A,PIK3C2B,PIK3CB,PIK3R3,PIK3R5,PRKCH,PRKCI,PRKCZ,PRKD1,RAC3,RASD1
Acetone Degradation I (to Methylglyoxal)	1.3	0.2	-0.816	Akr1c12/Akr1c13,Akr1cl,CYP1B1,CYP2B6,CYP2E1,CYP2F1,CYP51A1,PRXL2B
Non-Small Cell Lung Cancer Signaling	1.26	0.161	0.378	CDKN2A,E2F2,E2F3,ERAS,FHIT,HDAC9,PIK3C2A,PIK3C2B,PIK3CB,PIK3R3,PIK3R5,RASD1,RBL1,SOS1,SUV39H1
HMGB1 Signaling	1.26	0.145	0.258	AGER,CSF2,ERAS,FASLG,IFNGR2,IL12A,Il31,MAP2K6,MAP2K7,MAPK10,MAPK11,NGFR,PIK3C2A,PIK3C2B,PIK3CB,PIK3R3,PIK3R5,RAC3,RASD1,RHOBTB2,TNFRSF11B,TNFRSF1B,TNFSF10,TNFSF8
Endocannabinoid Neuronal Synapse Pathway	1.25	0.148	0.728	ABHD6,ADCY1,CACNA1A,CACNA1D,CACNA1G,CACNA2D2,CACNA2D3,CACNB1,CACNB2,CNR1,GNA14,GNA15,GNAO1,GNG13,GNG4,GNG7,GRIA4,GRIN2D,GUCY1A1,MAPK10,MAPK11,NOTUM
Neuregulin Signaling	1.25	0.154	-0.632	AREG,ERAS,EREG,ITGA10,ITGA3,ITGA4,ITGA8,ITGB4,PICK1,PIK3R3,PRKCH,PRKCI,PRKCZ,PRKD1,RASD1,SOS1,STAT5A,TMEFF2
SNARE Signaling Pathway	1.25	0.15	1.342	ADCY1,CACNA2D2,CACNB1,CACNB2,CAMK2A,GPAA1,GUCY1A1,MYL4,MYL6B,MYL7,MYO18A,MYO18B,MYO1H,MYO5C,SNCA,SNCG,STX1B,STXBP5,SYT12,SYT15
P2Y Purigenic Receptor Signaling Pathway	1.25	0.15	1.291	ADCY1,CREB3L4,ERAS,GNG13,GNG4,GNG7,GUCY1A1,NOTUM,P2RY1,P2RY2,PIK3C2A,PIK3C2B,PIK3CB,PIK3R3,PIK3R5,PRKCH,PRKCI,PRKCZ,PRKD1,RASD1
GABA Receptor Signaling	1.25	0.15	#NUM!	ADCY1,ALDH5A1,AP1B1,CACNA1A,CACNA1D,CACNA1G,CACNA2D2,CACNA2D3,CACNB1,CACNB2,GABRA2,GNA14,GNA15,GNAO1,GNG13,GNG4,GNG7,GUCY1A1,KCNH2,SLC6A13
NF-κB Activation by Viruses	1.25	0.167	0.302	CD4,ERAS,ITGA3,PIK3C2A,PIK3C2B,PIK3CB,PIK3R3,PIK3R5,PRKCH,PRKCI,PRKCZ,PRKD1,RASD1
Stearate Biosynthesis I (Animals)	1.24	0.175	0	Akr1c12/Akr1c13,Akr1cl,ASPG,BDH2,CYP2E1,LIPT2,LPCAT4,MBLAC2,PNPLA1,PRXL2B,SLC27A3
GDP-glucose Biosynthesis	1.24	0.333	#NUM!	PGM1,PGM3,PGM5
Phagosome Formation	1.23	0.122	2.086	ADGRA1,ADGRB2,ADGRF4,ADGRV1,ADRA1A,ADRA1B,ADRA2A,ADRB3,Agtr1b,AGTR2,AP1B1,AVPR1A,BDKRB2,C3,CCR9,CD14,CD36,CNR1,CYSLTR1,EDNRB,ERAS,F2RL1,F2RL2,FZD9,GAB2,GALR2,GPR132,GPR135,GPR162,GPR35,GPR4,GPR45,GPR61,GPR62,GPR85,GRM6,HCK,HTR1D,Igha,IGKC,ITGA10,ITGA3,ITGA4,ITGA8,ITGB4,LIMK1,LIMK2,LPAR3,LYN,MAP2K6,MAP2K7,MC1R,MYL4,MYL6B,MYL7,MYO18A,MYO18B,MYO1H,MYO5C,P2RY1,P2RY2,PAK3,PIK3C2A,PIK3C2B,PIK3CB,PIK3R3…
Fcγ Receptor-mediated Phagocytosis in Macrophages and Monocytes	1.23	0.16	0.258	ACTA2,CSF2,GAB2,HCK,LYN,NCF1,PIK3R3,PLD2,PLD4,PRKCH,PRKCI,PRKCZ,PRKD1,PTK2B,RAC3
IL-8 Signaling	1.22	0.139	0.447	ERAS,FLT1,GNA14,GNA15,GNAO1,GNG13,GNG4,GNG7,LIMK1,LIMK2,MAPK10,MYL7,NCF1,NOX1,PIK3C2A,PIK3C2B,PIK3CB,PIK3R3,PIK3R5,PLD2,PLD4,PRKCH,PRKCI,PRKCZ,PRKD1,PTK2B,RAC3,RASD1,RHOBTB2
Circadian Rhythm Signaling	1.22	0.135	#NUM!	ADCY1,CACNA1A,CACNA1D,CACNA1G,CACNA2D2,CACNA2D3,CACNB1,CACNB2,CAMK2A,CREB3L4,ERAS,GNA14,GNA15,GNG13,GNG4,GNG7,GRIA4,GRIN2D,GUCY1A1,HCK,LYN,MAP2K6,MAP2K7,NGFR,NOTUM,NPR1,PER2,PRKCH,PRKCI,PRKCZ,PRKD1,PRKG2,RASD1,RORB,RORC,SMARCC2
Dopamine Receptor Signaling	1.21	0.165	#NUM!	ADCY1,CALY,DDC,GUCY1A1,NCS1,PCBD1,PPM1L,PPP1R14C,PPP1R1B,PPP1R3D,PPP2R2B,PTS,SMOX
Chondroitin Sulfate Biosynthesis (Late Stages)	1.21	0.184	-1	CHST11,CHST12,CHST15,CHST2,CHST3,CHSY1,GAL3ST2,HS6ST3,NDST2
Role of p14/p19ARF in Tumor Suppression	1.2	0.214	-0.816	CDKN2A,PIK3C2A,PIK3C2B,PIK3CB,PIK3R3,PIK3R5
B Cell Development	1.2	0.19	#NUM!	CD79A,CD86,HLA-A,HLA-DMB,HLA-DQA1,HLA-DQB1,IGKC,IL7
Estrogen Receptor Signaling	1.18	0.128	0.762	ADCY1,AGT,CACNA1A,CACNA1D,CACNA2D2,CACNA2D3,CACNB1,CACNB2,CARM1,CREB3L4,ERAS,GNA14,GNA15,GNAO1,GNG13,GNG4,GNG7,GUCY1A1,JAK3,LIMK1,LIMK2,MED12L,MED16,MED17,MED18,MMP12,MMP15,MMP17,MMP27,MMP3,MYL4,MYL6B,MYL7,NDUFA9,NDUFAF1,NOTUM,PIK3C2A,PIK3C2B,PIK3CB,PIK3R3,PIK3R5,PPARGC1A,PRKCH,PRKCI,PRKCZ,PRKD1,PRKDC,RASD1,SHE,SOS1,TYK2,ZDHHC21
IL-6 Signaling	1.16	0.148	0.775	A2M,ABCB1,CD14,ERAS,HSPB2,MAP2K6,MAP2K7,MAPK10,MAPK11,NGFR,PIK3C2A,PIK3C2B,PIK3CB,PIK3R3,PIK3R5,RASD1,SOS1,TNFRSF11B,TNFRSF1B
Melanoma Signaling	1.16	0.18	0.447	CDKN2A,ERAS,MITF,PIK3C2A,PIK3C2B,PIK3CB,PIK3R3,PIK3R5,RASD1
HOTAIR Regulatory Pathway	1.13	0.142	-0.626	DNMT3B,MET,MMP12,MMP15,MMP17,MMP27,MMP3,MRTFA,PCDH10,PCDHB5,PIK3C2A,PIK3C2B,PIK3CB,PIK3R3,PIK3R5,SNUPN,SPP1,WIF1,WNT10A,WNT10B,WNT2,WNT2B,WNT4
Extrinsic Prothrombin Activation Pathway	1.12	0.25	#NUM!	F12,F13A1,F2,F5
Parkinson's Signaling	1.12	0.25	#NUM!	MAPK11,PRKN,SNCA,UCHL1
Oxytocin In Brain Signaling Pathway	1.12	0.138	-0.192	CACNA1A,CACNA1D,CACNA1G,CACNA2D2,CACNA2D3,CACNB1,CACNB2,CREB3L4,ERAS,GNAO1,GNG13,GNG4,GNG7,KCNJ13,NLRP12,PIK3C2A,PIK3C2B,PIK3CB,PIK3R3,PIK3R5,PLA2G5,PLA2G7,PRKCH,PRKCI,PRKCZ,PRKD1,RASD1
Glucose and Glucose-1-phosphate Degradation	1.12	0.3	#NUM!	PGM1,PGM3,PGM5
Heparan Sulfate Biosynthesis	1.1	0.159	-0.277	CHST11,CHST12,CHST15,CHST2,CHST3,EXTL1,GAL3ST2,HS6ST3,NDST2,NOTUM,PLA1A,PNPLA7,TARS2
Pyrimidine Deoxyribonucleotides De Novo Biosynthesis I	1.08	0.217	0.447	AK5,CMPK2,DUT,NME3,NME4
Vitamin-C Transport	1.08	0.217	-1	LRRC8B,SLC23A2,SLC2A3,STOM,TXNRD2
G-Protein Coupled Receptor Signaling	1.08	0.12	2.4	ADCY1,ADGRA1,ADGRB2,ADGRF4,ADGRV1,ADRA1A,ADRA1B,ADRA2A,ADRB3,Agtr1b,AGTR2,AVPR1A,BDKRB2,CAMK2A,CCR9,CNGB3,CNR1,CREB3L4,CYSLTR1,DUSP4,EDNRB,ENPP6,ERAS,F2RL1,F2RL2,FZD9,GALR2,GNA14,GNA15,GNAO1,GNG13,GNG4,GNG7,GPR132,GPR135,GPR162,GPR35,GPR4,GPR45,GPR61,GPR62,GPR85,GPRIN1,GRK6,GRM6,GUCY1A1,HCN2,HTR1D,KCNH2,LPAR3,MAP2K6,MAP2K7,MAP3K11,MAP3K15,MAPK10,MAPK11,MC1R,MEGF6,MRTFA,MYL4,MYL6B,MYL7,P2RY1,P2RY2…
ERK/MAPK Signaling	1.07	0.135	2.041	CREB3L4,DUSP2,DUSP4,ERAS,HSPB2,ITGA10,ITGA3,ITGA4,ITGA8,ITGB4,MYCN,PAK3,PIK3C2A,PIK3C2B,PIK3CB,PIK3R3,PIK3R5,PLA2G5,PPM1L,PPP1R14C,PPP1R3D,PPP2R2B,PRKCI,PTK2B,RAC3,RAPGEF4,RASD1,RPS6KA4,SOS1
NAD Biosynthesis III	1.06	0.4	#NUM!	NMNAT1,Nmnat3
Ovarian Cancer Signaling	1.05	0.14	0.378	BRCA2,CDKN2A,E2F2,E2F3,EDN1,ERAS,FGF9,FZD9,HDAC9,PIK3C2A,PIK3C2B,PIK3CB,PIK3R3,PIK3R5,RASD1,RBL1,SUV39H1,WNT10A,WNT10B,WNT2,WNT2B,WNT4
Serotonin Receptor Signaling	1.05	0.178	#NUM!	ADCY1,DDC,GUCY1A1,HTR1D,PCBD1,PTS,SLC6A4,SMOX
CREB Signaling in Neurons	1.05	0.121	1.364	ADCY1,ADGRA1,ADGRB2,ADGRF4,ADGRV1,ADRA1A,ADRA1B,ADRA2A,ADRB3,Agtr1b,AGTR2,AVPR1A,BDKRB2,CACNA1A,CACNA1D,CACNA1G,CACNA2D2,CACNA2D3,CACNB1,CACNB2,CAMK2A,CCR9,CNR1,CREB3L4,CYSLTR1,EDNRB,ERAS,F2RL1,F2RL2,FLT1,FZD9,GALR2,GNA14,GNA15,GNAO1,GNG13,GNG4,GNG7,GPR132,GPR135,GPR162,GPR35,GPR4,GPR45,GPR61,GPR62,GPR85,GRIA4,GRIN2D,GRM6,GUCY1A1,HGF,HTR1D,LPAR3,MC1R,NGFR,NOTUM,P2RY1,P2RY2,PIK3C2A,PIK3C2B,PIK3CB,…
GDNF Family Ligand-Receptor Interactions	1.04	0.158	0.632	ARTN,ERAS,GDNF,MAPK10,PIK3C2A,PIK3C2B,PIK3CB,PIK3R3,PIK3R5,RASD1,RET,SOS1
Dopamine-DARPP32 Feedback in cAMP Signaling	1.04	0.137	1.213	ADCY1,ATP2A1,CACNA1A,CACNA1D,CACNA2D2,CACNA2D3,CACNB1,CACNB2,CALY,CREB3L4,CREM,GRIN2D,GUCY1A1,KCNJ12,NOTUM,PPM1L,PPP1R14C,PPP1R1B,PPP1R3D,PPP2R2B,PRKCH,PRKCI,PRKCZ,PRKD1,PRKG2
IL-22 Signaling	1.02	0.208	2	IL22RA2,MAPK10,MAPK11,STAT5A,TYK2
Neuropathic Pain Signaling In Dorsal Horn Neurons	1.01	0.149	1.807	CAMK2A,GRIA4,GRIN2D,GRM6,KCNH2,NOTUM,PIK3C2A,PIK3C2B,PIK3CB,PIK3R3,PIK3R5,PRKCH,PRKCI,PRKCZ,PRKD1
Dermatan Sulfate Biosynthesis (Late Stages)	1.01	0.174	-0.707	CHST11,CHST12,CHST15,CHST2,CHST3,GAL3ST2,HS6ST3,NDST2
Factors Promoting Cardiogenesis in Vertebrates	1	0.139	0.655	BMP7,BMP8A,CAMK2A,CREB3L4,FZD9,GJA5,MAPK10,NODAL,NOG,NOTUM,PRKCH,PRKCI,PRKCZ,PRKD1,SMAD9,TBX5,WNT10A,WNT10B,WNT2,WNT2B,WNT4
tRNA Charging	0.987	0.179	-1.89	AARS2,CARS1,CARS2,NARS2,TARS2,VARS2,YARS2
Methylthiopropionate Biosynthesis	0.983	1	#NUM!	ADI1
Thio-molybdenum Cofactor Biosynthesis	0.983	1	#NUM!	MOCOS
Methylglyoxal Degradation VI	0.983	1	#NUM!	LDHD
Histamine Biosynthesis	0.983	1	#NUM!	HDC
Asparagine Biosynthesis I	0.983	1	#NUM!	ASNS
VDR/RXR Activation	0.979	0.154	0	CD14,COL13A1,CSF2,CXCL10,IGFBP5,IL12A,PRKCH,PRKCI,PRKCZ,PRKD1,S100G,SPP1
Neurotrophin/TRK Signaling	0.979	0.154	0.632	CREB3L4,ERAS,MAP2K6,MAP2K7,NGFR,PIK3C2A,PIK3C2B,PIK3CB,PIK3R3,PIK3R5,RASD1,SOS1
BMP signaling pathway	0.979	0.151	0.333	BMP7,BMP8A,ERAS,FST,MAPK10,MAPK11,NOG,PITX2,RASD1,SMAD9,SMURF1,SOS1,SOSTDC1
Differential Regulation of Cytokine Production in Macrophages and T Helper Cells by IL-17A and IL-17F	0.967	0.222	1	CCL4,CSF2,CSF3,IL12A
Ephrin A Signaling	0.967	0.17	#NUM!	EPHA5,LIMK1,NGFR,PIK3C2A,PIK3C2B,PIK3CB,PIK3R3,PIK3R5
Bupropion Degradation	0.959	0.2	-0.447	CYP1B1,CYP2B6,CYP2E1,CYP2F1,CYP51A1
CDP-diacylglycerol Biosynthesis I	0.959	0.2	2.236	CDS1,GPAT2,LPCAT2,LPCAT4,TAMM41
NAD Salvage Pathway II	0.959	0.2	0.447	ACP4,NMNAT1,Nmnat3,NUDT12,PXYLP1
NER (Nucleotide Excision Repair, Enhanced Pathway)	0.959	0.146	-2.309	CHAF1B,COPS7B,DDB2,ERCC2,ERCC4,ERCC5,ERCC6,ERCC8,LIG4,POLA1,POLD1,POLK,RFC4,RPA1,XRCC1
NGF Signaling	0.947	0.142	1.291	CREB3L4,ERAS,MAP3K11,MAP3K15,MAPK10,NGFR,PIK3C2A,PIK3C2B,PIK3CB,PIK3R3,PIK3R5,PRKCZ,RASD1,RPS6KA2,RPS6KA4,SMPD4,SOS1
Role of Osteoblasts, Osteoclasts and Chondrocytes in Rheumatoid Arthritis	0.928	0.13	#NUM!	BMP7,BMP8A,CSF2,FZD9,IL7,MAP2K6,MAP2K7,MAPK10,MMP3,NGFR,PIK3C2A,PIK3C2B,PIK3CB,PIK3R3,PIK3R5,PTK2B,SFRP4,SFRP5,SMAD9,SMURF1,SPP1,TNFRSF11B,TNFRSF1B,WIF1,WNT10A,WNT10B,WNT2,WNT2B,WNT4
Triacylglycerol Biosynthesis	0.924	0.167	1.633	ASPG,GPAT2,LIPT2,LPCAT2,LPCAT4,PLPP4,PLPPR3,PNPLA1
Apelin Muscle Signaling Pathway	0.924	0.167	#NUM!	APLN,GNA14,GNA15,GNAO1,GNG13,GNG4,GNG7,PPARGC1A
Cleavage and Polyadenylation of Pre-mRNA	0.921	0.25	#NUM!	CSTF1,CSTF2,CSTF3
NAD biosynthesis II (from tryptophan)	0.921	0.25	#NUM!	NADSYN1,NMNAT1,Nmnat3
NAD Phosphorylation and Dephosphorylation	0.921	0.25	#NUM!	ACP4,NADK2,PXYLP1
Urea Cycle	0.917	0.333	#NUM!	ARG1,ASL
Arginine Degradation VI (Arginase 2 Pathway)	0.917	0.333	#NUM!	ARG1,PYCR1
NAD Salvage Pathway III	0.917	0.333	#NUM!	NMNAT1,Nmnat3
UDP-N-acetyl-D-glucosamine Biosynthesis II	0.917	0.333	#NUM!	FMO3,PGM3
Melatonin Signaling	0.914	0.153	1.508	CAMK2A,GNAO1,MAP2K6,MAP2K7,NOTUM,PRKCH,PRKCI,PRKCZ,PRKD1,RORB,RORC
Prostate Cancer Signaling	0.914	0.142	#NUM!	CCNE2,CREB3L4,E2F2,E2F3,ERAS,HDAC9,PIK3C2A,PIK3C2B,PIK3CB,PIK3R3,PIK3R5,RASD1,RBL1,SOS1,SRD5A1,SUV39H1
Estrogen-mediated S-phase Entry	0.903	0.192	0.447	CCNE2,E2F2,E2F3,E2F7,RBL1
CDK5 Signaling	0.889	0.14	0.632	ADCY1,CACNA1A,ERAS,GUCY1A1,ITGA3,LAMA1,LAMA3,MAPK10,MAPK11,NGFR,PPM1L,PPP1R14C,PPP1R1B,PPP1R3D,PPP2R2B,RASD1
Human Embryonic Stem Cell Pluripotency	0.883	0.133	#NUM!	BMP7,BMP8A,FZD9,GNA14,GNA15,GNAO1,GNG13,GNG4,GNG7,NODAL,NOG,PIK3C2A,PIK3C2B,PIK3CB,PIK3R3,PIK3R5,S1PR1,WNT10A,WNT10B,WNT2,WNT2B,WNT4
Role of IL-17A in Arthritis	0.883	0.158	#NUM!	CXCL3,MAP2K6,MAPK10,MAPK11,PIK3C2A,PIK3C2B,PIK3CB,PIK3R3,PIK3R5
Pyridoxal 5'-phosphate Salvage Pathway	0.883	0.154	0.632	ADPGK,GRK6,LIMK1,LIMK2,MAP2K6,NEK2,PAK3,PLK1,PRKCH,PRKX
Chondroitin Sulfate Biosynthesis	0.883	0.158	-1	CHST11,CHST12,CHST15,CHST2,CHST3,CHSY1,GAL3ST2,HS6ST3,NDST2
Telomerase Signaling	0.879	0.142	-0.577	ERAS,HDAC9,IL2RA,IL2RG,PIK3C2A,PIK3C2B,PIK3CB,PIK3R3,PIK3R5,PPM1L,PPP2R2B,RASD1,SOS1,TEP1,TERT
Erythropoietin Signaling Pathway	0.876	0.132	0.209	CSF2,CSF2RB,ERAS,FASLG,HBB,IL12A,Il31,PIK3C2A,PIK3C2B,PIK3CB,PIK3R3,PIK3R5,PRKCH,PRKCI,PRKCZ,PRKD1,PTPN6,RAC3,RASD1,SOS1,STAT5A,TNFSF10,TNFSF8
LXR/RXR Activation	0.873	0.138	0.775	AGT,AHSG,C3,C4A/C4B,CD14,CD36,CYP51A1,HMGCR,ITIH4,NGFR,NR1H4,SERPINA1,SERPINF2,TF,TNFRSF11B,TNFRSF1B,VTN
Pyrimidine Ribonucleotides Interconversion	0.873	0.176	0.816	AK5,CMPK2,ENTPD1,NME3,NME4,NUDT15
Gαi Signaling	0.873	0.136	-1.508	ADCY1,ADRA2A,AGTR2,CNR1,ERAS,GNA14,GNA15,GNAO1,GNG13,GNG4,GNG7,GRM6,GUCY1A1,HTR1D,RAP1GAP,RASD1,RGS7,S1PR1,SOS1
UVA-Induced MAPK Signaling	0.873	0.143	1.414	ERAS,MAPK10,MAPK11,NOTUM,PARP10,PIK3C2A,PIK3C2B,PIK3CB,PIK3R3,PIK3R5,RASD1,RPS6KA2,RPS6KA4,SMPD4
VEGF Signaling	0.873	0.143	-0.577	ACTA2,Actn3,ERAS,FLT1,PIK3C2A,PIK3C2B,PIK3CB,PIK3R3,PIK3R5,PTK2B,PTPN6,RASD1,SH2D2A,SOS1
Osteoarthritis Pathway	0.873	0.128	1.043	ADIPOQ,AGER,ANKH,C1QTNF4,CASP7,CCN4,CNMD,COL10A1,COL2A1,CREB3L4,FZD9,GDF5,GLI2,GLIS1,H19,ITGA10,ITGA3,ITGA4,ITGA8,ITGB4,MMP12,MMP3,PPARGC1A,PTCH1,PTCH2,PTHLH,S100A9,SMAD9,SPP1,TNFRSF1B
MSP-RON Signaling In Cancer Cells Pathway	0.873	0.136	-0.471	ACTA2,CREB3L4,CSF2RB,ERAS,F12,IL3RA,ITGB4,MET,PIK3C2A,PIK3C2B,PIK3CB,PIK3R3,PIK3R5,PTK2B,RASD1,RPS6KA2,SOS1,ST14,TRIM24
Senescence Pathway	0.863	0.125	1.061	ASXL3,ATR,CACNA1A,CACNA1D,CACNA2D2,CACNA2D3,CACNB1,CACNB2,CAPN6,CAPN7,CCNE2,CDKN2A,CHEK1,CHEK2,E2F2,E2F3,E2F7,ERAS,HIPK2,MAP2K6,MAP2K7,PDK3,PHF19,PIK3C2A,PIK3C2B,PIK3CB,PIK3R3,PIK3R5,PML,PPM1L,PPP2R2B,PRKCZ,RASD1,RBL1,RPS6KA4,Saa3,SMAD9
Phosphatidylglycerol Biosynthesis II (Non-plastidic)	0.851	0.185	2.236	CDS1,GPAT2,LPCAT2,LPCAT4,TAMM41
Cell Cycle: G2/M DNA Damage Checkpoint Regulation	0.851	0.16	-0.378	ATR,CDKN2A,CHEK1,CHEK2,HIPK2,PLK1,PRKDC,RPRM
RANK Signaling in Osteoclasts	0.839	0.143	0.577	MAP2K6,MAP2K7,MAP3K11,MAP3K15,MAPK10,MAPK11,MITF,PIK3C2A,PIK3C2B,PIK3CB,PIK3R3,PIK3R5,PTK2B
Nucleotide Excision Repair Pathway	0.83	0.171	#NUM!	ERCC2,ERCC4,ERCC5,ERCC6,ERCC8,RPA1
CD40 Signaling	0.818	0.149	1	JAK3,MAP2K6,MAP2K7,MAPK10,MAPK11,PIK3C2A,PIK3C2B,PIK3CB,PIK3R3,PIK3R5
Oncostatin M Signaling	0.818	0.163	-0.447	ERAS,JAK3,MMP3,RASD1,SOS1,STAT5A,TYK2
IL-17A Signaling in Airway Cells	0.818	0.149	0.333	CXCL3,JAK3,MAPK10,MAPK11,PIK3C2A,PIK3C2B,PIK3CB,PIK3R3,PIK3R5,TYK2
Cell Cycle: G1/S Checkpoint Regulation	0.818	0.149	-1.265	ATR,CCNE2,CDKN2A,E2F2,E2F3,E2F7,HDAC9,RBL1,RPL5,SUV39H1
SPINK1 General Cancer Pathway	0.818	0.149	0.707	ERAS,JAK3,Mt3,PIK3C2A,PIK3C2B,PIK3CB,PIK3R3,PIK3R5,RASD1,TYK2
Dermatan Sulfate Biosynthesis	0.815	0.153	-1	CHST11,CHST12,CHST15,CHST2,CHST3,CHSY1,GAL3ST2,HS6ST3,NDST2
3-phosphoinositide Biosynthesis	0.807	0.127	1.789	DUSP2,DUSP4,EPHX2,NUDT11,NUDT12,NUDT14,NUDT15,PALD1,PIK3C2A,PIK3C2B,PIK3CB,PIK3R3,PIK3R5,PLPP7,PPFIA2,PPFIBP2,PPM1L,PPP1R14C,PPP1R1B,PPP1R3D,PPP1R8,PPP2R2B,PTPN6,PXYLP1,SACM1L,SSH1
TR/RXR Activation	0.804	0.143	#NUM!	ATP2A1,ENO1,PIK3C2A,PIK3C2B,PIK3CB,PIK3R3,PIK3R5,PPARGC1A,STRBP,SYT12,THRSP,TRH
Glioblastoma Multiforme Signaling	0.79	0.129	0	CCNE2,CDKN2A,E2F2,E2F3,E2F7,ERAS,FZD9,NOTUM,PIK3C2A,PIK3C2B,PIK3CB,PIK3R3,PIK3R5,RAC3,RASD1,RHOBTB2,SOS1,WNT10A,WNT10B,WNT2,WNT2B,WNT4
Pyrimidine Ribonucleotides De Novo Biosynthesis	0.788	0.167	0.816	AK5,CMPK2,ENTPD1,NME3,NME4,NUDT15
Xenobiotic Metabolism AHR Signaling Pathway	0.777	0.141	0	AHRR,ALDH1A3,ALDH5A1,CYP1B1,GSTA3,GSTM2,Gstm6,GSTT2/GSTT2B,MGST2,SENP1,UGT1A4,UGT1A6
Calcium Signaling	0.77	0.126	0.775	ACTA2,AKAP5,ATP2A1,CACNA1A,CACNA1D,CACNA1G,CACNA2D2,CACNA2D3,CACNB1,CACNB2,CAMK2A,CASQ2,CREB3L4,GRIA4,GRIN2D,HDAC9,MYL4,MYL6B,MYL7,MYO18A,MYO18B,MYO1H,MYO5C,SLC8A2,TNNI2,TNNT2,TP63
DNA Double-Strand Break Repair by Homologous Recombination	0.767	0.214	#NUM!	BRCA2,POLA1,RPA1
Mevalonate Pathway I	0.767	0.214	#NUM!	HMGCR,IDI1,MVD
Antioxidant Action of Vitamin C	0.764	0.135	-1.265	CSF2,CSF2RA,CSF2RB,MAPK10,MAPK11,NOTUM,PLA2G5,PLA2G7,PLD2,PLD4,SLC23A2,SLC2A3,SLC2A8,STAT5A,TXNRD2
Methylglyoxal Degradation III	0.754	0.172	#NUM!	Akr1b10,Akr1c12/Akr1c13,Akr1cl,CYP2E1,PRXL2B
Superpathway of Cholesterol Biosynthesis	0.754	0.172	2.236	CYP51A1,HMGCR,IDI1,MVD,SC5D
Role of Pattern Recognition Receptors in Recognition of Bacteria and Viruses	0.747	0.129	0.277	C3,CSF2,FASLG,IFIH1,IL12A,Il31,MAPK10,NOD2,OAS1,PIK3C2A,PIK3C2B,PIK3CB,PIK3R3,PIK3R5,PRKCH,PRKCI,PRKCZ,PRKD1,TNFSF10,TNFSF8
Relaxin Signaling	0.747	0.129	0.632	ADCY1,ENPP6,GNA14,GNA15,GNAO1,GNG13,GNG4,GNG7,GUCY1A1,NPR1,PDE2A,PDE4C,PIK3C2A,PIK3C2B,PIK3CB,PIK3R3,PIK3R5,PRKCZ,SMARCC2,SMPDL3B
Cell Cycle Regulation by BTG Family Proteins	0.747	0.162	1	CCNE2,E2F2,E2F3,E2F7,PPM1L,PPP2R2B
Colorectal Cancer Metastasis Signaling	0.745	0.122	-0.626	ADCY1,BIRC5,ERAS,FZD9,GNA14,GNA15,GNAO1,GNG13,GNG4,GNG7,GUCY1A1,JAK3,MAPK10,MMP12,MMP15,MMP17,MMP27,MMP3,PIK3C2A,PIK3C2B,PIK3CB,PIK3R3,PIK3R5,RAC3,RASD1,RHOBTB2,SOS1,TYK2,WNT10A,WNT10B,WNT2,WNT2B,WNT4
ILK Signaling	0.745	0.126	0.943	ACTA2,Actn3,CREB3L4,ITGB4,LIMS2,MAP2K6,MAPK10,MYL4,MYL6B,MYL7,MYO18A,MYO18B,MYO1H,MYO5C,PARVB,PIK3C2A,PIK3C2B,PIK3CB,PIK3R3,PIK3R5,PPM1L,PPP2R2B,RAC3,RHOBTB2,RPS6KA4
PI3K/AKT Signaling	0.745	0.126	-0.632	CSF2RB,ERAS,GAB2,GYS1,IL12RB1,IL13RA2,IL21R,IL22RA2,IL27RA,IL2RA,IL2RG,IL3RA,ITGA10,ITGA3,ITGA4,ITGA8,ITGB4,JAK3,PIK3CB,PIK3R3,PPM1L,PPP2R2B,RASD1,SOS1,TYK2
Adrenomedullin signaling pathway	0.745	0.126	1.528	ADCY1,C3,ERAS,GNA14,GNA15,GUCY1A1,KCNH2,MAP2K6,MAP2K7,MAPK10,MAPK11,NOTUM,NPR1,PIK3C2A,PIK3C2B,PIK3CB,PIK3R3,PIK3R5,PRKG2,PTK2B,RASD1,SHE,SMARCC2,SOS1,TFAP2C
HER-2 Signaling in Breast Cancer	0.738	0.124	-0.6	AAAS,AREG,BIRC5,CASP7,CCNE2,COX11,COX15,COX7A1,DDX19B,ERAS,HCK,ITGB4,LYN,NUP205,PARD6A,PARD6B,PIK3C2A,PIK3C2B,PIK3CB,PIK3R3,PIK3R5,PRKCH,PRKCI,PRKCZ,PRKD1,RASD1,RBL1,SOS1
AMPK Signaling	0.735	0.123	0.688	ADIPOQ,ADRA1A,ADRA1B,ADRA2A,ADRB3,AK5,CPT1B,CPT1C,CREB3L4,GNA14,GNA15,GNAO1,GNG13,GNG4,GNG7,GYS1,HMGCR,MAPK11,PFKFB1,PFKFB4,PIK3C2A,PIK3C2B,PIK3CB,PIK3R3,PIK3R5,PPARGC1A,PPM1F,PPM1L,PPP2R2B,SMARCC2
Regulation Of The Epithelial Mesenchymal Transition In Development Pathway	0.728	0.138	-1.155	FZD9,GLI2,GLIS1,GSC,PTCH1,PTCH2,SUFU,WNT10A,WNT10B,WNT2,WNT2B,WNT4
Renal Cell Carcinoma Signaling	0.717	0.139	1	ERAS,HGF,MET,PAK3,PIK3C2A,PIK3C2B,PIK3CB,PIK3R3,PIK3R5,RASD1,SOS1
Triacylglycerol Degradation	0.717	0.148	0	ABHD6,CEL,LIPG,NDST2,NOTUM,PLA1A,PNPLA7,TARS2
Phototransduction Pathway	0.717	0.148	#NUM!	CNGB3,GUCA1B,GUCY1A1,NPR1,OPN3,PDC,RCVRN,SAG
Breast Cancer Regulation by Stathmin1	0.712	0.115	0.985	ADGRA1,ADGRB2,ADGRF4,ADGRV1,ADRA1A,ADRA1B,ADRA2A,ADRB3,Agtr1b,AGTR2,ARHGEF15,ARHGEF18,ARHGEF9,AVPR1A,BDKRB2,CAMK2A,CCR9,CNR1,CREB3L4,CYSLTR1,E2F2,E2F3,E2F7,EDNRB,ERAS,F2RL1,F2RL2,FZD9,GALR2,GNG13,GNG4,GNG7,GPR132,GPR135,GPR162,GPR35,GPR4,GPR45,GPR61,GPR62,GPR85,GRM6,HGF,HTR1D,LPAR3,MC1R,P2RY1,P2RY2,PIK3C2A,PIK3C2B,PIK3CB,PIK3R3,PIK3R5,PPM1L,PPP1R14C,PPP1R3D,PPP2R2B,PRKCH,PRKCI,PRKCZ,PRKD1,PTGIR,R…
Apelin Pancreas Signaling Pathway	0.712	0.152	0.378	APLN,MAPK10,PIK3C2A,PIK3C2B,PIK3CB,PIK3R3,PIK3R5
Docosahexaenoic Acid (DHA) Signaling	0.71	0.158	#NUM!	BCL2A1,PIK3C2A,PIK3C2B,PIK3CB,PIK3R3,PIK3R5
Inhibition of Matrix Metalloproteases	0.71	0.158	0.816	A2M,MMP12,MMP15,MMP17,MMP27,MMP3
Integrin Signaling	0.71	0.124	-0.209	ACTA2,Actn3,ARHGAP26,BCAR3,CAPN6,CAPN7,ERAS,ITGA10,ITGA3,ITGA4,ITGA8,ITGB4,MAP3K11,MYL7,PAK3,PARVB,PFN2,PIK3C2A,PIK3C2B,PIK3CB,PIK3R3,PIK3R5,RAC3,RASD1,RHOBTB2,SOS1
Synaptic Long Term Potentiation	0.708	0.13	2.84	ADCY1,CAMK2A,CREB3L4,ERAS,GNA14,GNA15,GRIA4,GRIN2D,GRM6,NOTUM,PPP1R14C,PPP1R3D,PRKCH,PRKCI,PRKCZ,PRKD1,RASD1
Asparagine Degradation I	0.708	0.5	#NUM!	ASPG
Dolichol and Dolichyl Phosphate Biosynthesis	0.708	0.5	#NUM!	DHDDS
Spermine Biosynthesis	0.708	0.5	#NUM!	AMD1
S-methyl-5'-thioadenosine Degradation II	0.708	0.5	#NUM!	MTAP
Alanine Degradation III	0.708	0.5	#NUM!	GPT
Alanine Biosynthesis II	0.708	0.5	#NUM!	GPT
Spermidine Biosynthesis I	0.708	0.5	#NUM!	AMD1
Fatty Acid Biosynthesis Initiation II	0.708	0.5	#NUM!	OXSM
Cysteine Biosynthesis/Homocysteine Degradation	0.708	0.5	#NUM!	CBS/CBSL
Superpathway of Citrulline Metabolism	0.703	0.2	#NUM!	ARG1,ASL,LOC102724788/PRODH
Choline Biosynthesis III	0.703	0.2	#NUM!	PHKA1,PLD2,PLD4
Leukotriene Biosynthesis	0.703	0.2	#NUM!	GGT1,GGT7,MGST2
Superpathway of Melatonin Degradation	0.697	0.143	0.333	CYP1B1,CYP2B6,CYP2E1,CYP2F1,CYP51A1,LARGE2,SMOX,UGT1A4,UGT1A6
Ephrin Receptor Signaling	0.697	0.124	0.728	ARHGEF15,CREB3L4,EFNB3,EPHA5,ERAS,FGF1,GNA14,GNA15,GNAO1,GNG13,GNG4,GNG7,GRIN2D,ITGA10,ITGA3,ITGA4,ITGA8,ITGB4,LIMK1,LIMK2,PAK3,RAC3,RASD1,SH2D3C,SOS1
EGF Signaling	0.686	0.145	0.378	MAP2K7,MAPK11,PIK3C2A,PIK3C2B,PIK3CB,PIK3R3,PIK3R5,SOS1
Hereditary Breast Cancer Signaling	0.684	0.128	#NUM!	ATR,BRCA2,CHEK1,CHEK2,DDB2,ERAS,FAAP100,FANCD2,HDAC9,PIK3C2A,PIK3C2B,PIK3CB,PIK3R3,PIK3R5,RASD1,RFC4,RPA1,SMARCC2
Regulation of Cellular Mechanics by Calpain Protease	0.682	0.135	0	Actn3,CAPN6,CAPN7,CCNE2,CNGB3,ERAS,ITGA10,ITGA3,ITGA4,ITGA8,ITGB4,RASD1
Gustation Pathway	0.682	0.123	0.626	ADCY1,CACNA1A,CACNA1D,CACNA1G,CACNA2D2,CACNA2D3,CACNB1,CACNB2,CD36,GABRA2,GNG13,GUCY1A1,KCNH2,KCNJ12,LIPG,LRRC8B,NOTUM,P2RX6,P2RY1,P2RY2,SCN2B,SCN3A,SCN3B,SCNN1B,TAS2R60
Glioma Invasiveness Signaling	0.68	0.139	0.816	ERAS,PIK3C2A,PIK3C2B,PIK3CB,PIK3R3,PIK3R5,RAC3,RASD1,RHOBTB2,VTN
Netrin Signaling	0.68	0.139	0.632	ABLIM2,CACNA1A,CACNA1D,CACNA1G,CACNA2D2,CACNA2D3,CACNB1,CACNB2,RAC3,UNC5D
Differential Regulation of Cytokine Production in Intestinal Epithelial Cells by IL-17A and IL-17F	0.678	0.174	1	CCL4,CSF2,CSF3,IL12A
Neurovascular Coupling Signaling Pathway	0.668	0.122	1.732	BDKRB2,CACNA1A,CACNA1D,CACNA1G,CACNA2D2,CACNA2D3,CACNB1,CACNB2,ENTPD1,ENTPD5,GABRA2,GRIA4,GRIN2D,GUCY1A1,KCNJ12,KCNMA1,NPR1,P2RY1,PLA2G5,PLA2G7,PLD2,PRKG2,PTGIR,SLC16A1,SLCO2A1,SMARCC2,TRPV4
Apelin Adipocyte Signaling Pathway	0.66	0.133	0	ADCY1,APLN,GSTM2,GSTT2/GSTT2B,GUCY1A1,MAPK10,MAPK11,MGST2,NCF1,NOX1,PPARGC1A,RAC3
Androgen Signaling	0.658	0.124	-0.302	CACNA1A,CACNA1D,CACNA1G,CACNA2D2,CACNA2D3,CACNB1,CACNB2,ERCC2,GNA14,GNA15,GNAO1,GNG13,GNG4,GNG7,GTF2E2,PRKCH,PRKCI,PRKCZ,PRKD1,TAF5L,TAF6L
Primary Immunodeficiency Signaling	0.658	0.143	#NUM!	AICDA,CD4,CD79A,Igha,IGKC,IL2RG,JAK3,UNG
Gαs Signaling	0.656	0.128	0.333	ADCY1,ADRB3,CNGB3,CNR1,CREB3L4,GNA14,GNA15,GNAO1,GNG13,GNG4,GNG7,GUCY1A1,HCK,MC1R,PTGIR,RAPGEF4
NRF2-mediated Oxidative Stress Response	0.654	0.121	0.707	ABCC4,ACTA2,AOX1,CYP2B6,Cyp2c23,CYP2E1,CYP2F1,DNAJB5,DNAJC16,DNAJC17,ERAS,GSTA3,GSTM2,Gstm6,GSTT2/GSTT2B,MAP2K6,MAP2K7,MGST2,PIK3C2A,PIK3C2B,PIK3CB,PIK3R3,PIK3R5,PRKCH,PRKCI,PRKCZ,PRKD1,RASD1
nNOS Signaling in Skeletal Muscle Cells	0.648	0.146	#NUM!	CACNA1A,CACNA1D,CACNA1G,CACNA2D2,CACNA2D3,CACNB1,CACNB2
Mismatch Repair in Eukaryotes	0.646	0.188	#NUM!	POLD1,RFC4,RPA1
Neuroinflammation Signaling Pathway	0.635	0.117	-0.18	AGER,BIRC5,CD86,CREB3L4,CXCL10,FASLG,GABRA2,GDNF,GRIN2D,HLA-A,HLA-DMB,HLA-DQA1,HLA-DQB1,IFNGR2,IL12A,IL34,JAK3,MAPK10,MAPK11,MMP3,NCF1,NOX1,PIK3C2A,PIK3C2B,PIK3CB,PIK3R3,PIK3R5,PLA2G5,RAC3,S100B,S100G,SLC6A13,SNCA,TICAM2,TIRAP,TYK2,ZBTB12
Cysteine Biosynthesis III (mammalia)	0.633	0.167	-1	CBS/CBSL,MGMT,MRM2,NSUN4
Pathogenesis of Multiple Sclerosis	0.623	0.222	#NUM!	CCL4,CXCL10
Cyclins and Cell Cycle Regulation	0.623	0.133	0.707	ATR,CCNE2,CDKN2A,E2F2,E2F3,E2F7,HDAC9,PPM1L,PPP2R2B,RBL1,SUV39H1
Citrulline Biosynthesis	0.623	0.222	#NUM!	ARG1,LOC102724788/PRODH
Ketolysis	0.623	0.222	#NUM!	BDH1,BDH2
Salvage Pathways of Pyrimidine Deoxyribonucleotides	0.623	0.222	#NUM!	AICDA,CDA
Retinoate Biosynthesis I	0.607	0.146	0	ADH7,Akr1b10,Akr1c12/Akr1c13,Akr1cl,ALDH1A3,RDH11
Sphingosine-1-phosphate Signaling	0.604	0.126	0.302	ADCY1,ASAH2,CASP7,GUCY1A1,NOTUM,PIK3C2A,PIK3C2B,PIK3CB,PIK3R3,PIK3R5,PTK2B,RAC3,RHOBTB2,S1PR1,SMPD4
Melatonin Degradation I	0.604	0.138	0	CYP1B1,CYP2B6,CYP2E1,CYP2F1,CYP51A1,LARGE2,UGT1A4,UGT1A6
PEDF Signaling	0.602	0.131	0.707	CASP7,ERAS,FASLG,GDNF,MAPK11,PIK3C2A,PIK3C2B,PIK3CB,PIK3R3,PIK3R5,RASD1
WNT/β-catenin Signaling	0.597	0.121	-1.414	CDH2,CDH5,CDKN2A,FRAT1,FZD9,GNAO1,PPM1L,PPP2R2B,RUVBL2,SFRP4,SFRP5,SOX11,SOX12,SOX13,SOX6,WIF1,WNT10A,WNT10B,WNT2,WNT2B,WNT4
Role of JAK family kinases in IL-6-type Cytokine Signaling	0.592	0.16	#NUM!	MAPK10,MAPK11,STAT5A,TYK2
Tryptophan Degradation X (Mammalian, via Tryptamine)	0.592	0.16	#NUM!	Akr1b10,ALDH1A3,DDC,SMOX
Aryl Hydrocarbon Receptor Signaling	0.567	0.121	-0.333	AHRR,ALDH1A3,ALDH5A1,ATR,CCNE2,CDKN2A,CHEK1,CHEK2,CYP1B1,Cyp2c23,FASLG,GSTA3,GSTM2,Gstm6,GSTT2/GSTT2B,HSPB2,MGST2,POLA1,RBL1
Role of JAK2 in Hormone-like Cytokine Signaling	0.564	0.147	#NUM!	PTPN6,SH2B1,SOCS7,STAT5A,TYK2
Small Cell Lung Cancer Signaling	0.558	0.126	0.447	CCNE2,E2F2,E2F3,FHIT,HDAC9,PIK3C2A,PIK3C2B,PIK3CB,PIK3R3,PIK3R5,RBL1,SUV39H1
Endometrial Cancer Signaling	0.554	0.133	0	ERAS,PIK3C2A,PIK3C2B,PIK3CB,PIK3R3,PIK3R5,RASD1,SOS1
Mouse Embryonic Stem Cell Pluripotency	0.554	0.125	-0.302	ERAS,FZD9,JAK3,MAPK11,PIK3C2A,PIK3C2B,PIK3CB,PIK3R3,PIK3R5,RASD1,SMAD9,SOS1,TYK2
IGF-1 Signaling	0.554	0.125	0.333	ERAS,IGFBP2,IGFBP5,PIK3C2A,PIK3C2B,PIK3CB,PIK3R3,PIK3R5,PRKCI,PRKCZ,RASD1,SOCS7,SOS1
Regulation of Actin-based Motility by Rho	0.553	0.124	0	ACTA2,ITGA10,ITGA3,ITGA4,ITGA8,ITGB4,LIMK1,MYL4,MYL6B,MYL7,PAK3,PFN2,RAC3,RHOBTB2
eNOS Signaling	0.553	0.12	0.535	ADCY1,AQP1,AQP11,AQP2,BDKRB2,CNGB3,FLT1,GUCY1A1,LPAR3,NOSTRIN,PIK3C2A,PIK3C2B,PIK3CB,PIK3R3,PIK3R5,PRKCH,PRKCI,PRKCZ,PRKD1
Coenzyme A Biosynthesis	0.553	0.333	#NUM!	PPCDC
Proline Degradation	0.553	0.333	#NUM!	LOC102724788/PRODH
Glutathione Biosynthesis	0.553	0.333	#NUM!	GSS
Palmitate Biosynthesis I (Animals)	0.553	0.333	#NUM!	OXSM
Tetrahydrobiopterin Biosynthesis I	0.553	0.333	#NUM!	PTS
Thiosulfate Disproportionation III (Rhodanese)	0.553	0.333	#NUM!	MOCS3
Tetrahydrobiopterin Biosynthesis II	0.553	0.333	#NUM!	PTS
Tyrosine Biosynthesis IV	0.553	0.333	#NUM!	PCBD1
4-aminobutyrate Degradation I	0.553	0.333	#NUM!	ALDH5A1
N-acetylglucosamine Degradation I	0.553	0.333	#NUM!	GNPDA1
Superpathway of Geranylgeranyldiphosphate Biosynthesis I (via Mevalonate)	0.547	0.167	#NUM!	HMGCR,IDI1,MVD
IL-1 Signaling	0.538	0.125	#NUM!	ADCY1,GNA14,GNA15,GNAO1,GNG13,GNG4,GNG7,GUCY1A1,MAP2K6,MAP2K7,MAPK10,MAPK11
TGF-β Signaling	0.538	0.125	-0.447	AMH,BMP7,ERAS,GSC,MAP2K6,MAPK11,NODAL,PITX2,RASD1,SMAD9,SMURF1,SOS1
Oxytocin In Spinal Neurons Signaling Pathway	0.532	0.143	-0.447	AVPR1A,GUCY1A1,NPR1,PRKG2,SMARCC2
D-myo-inositol (1,4,5,6)-Tetrakisphosphate Biosynthesis	0.527	0.118	1.807	DUSP2,DUSP4,EPHX2,NUDT11,NUDT12,NUDT14,NUDT15,PALD1,PLPP7,PPFIA2,PPFIBP2,PPM1L,PPP1R14C,PPP1R1B,PPP1R3D,PPP1R8,PPP2R2B,PTPN6,PXYLP1,SACM1L,SSH1
D-myo-inositol (3,4,5,6)-tetrakisphosphate Biosynthesis	0.527	0.118	1.807	DUSP2,DUSP4,EPHX2,NUDT11,NUDT12,NUDT14,NUDT15,PALD1,PLPP7,PPFIA2,PPFIBP2,PPM1L,PPP1R14C,PPP1R1B,PPP1R3D,PPP1R8,PPP2R2B,PTPN6,PXYLP1,SACM1L,SSH1
G Protein Signaling Mediated by Tubby	0.52	0.136	#NUM!	GNA14,GNA15,GNAO1,GNG13,GNG4,GNG7
Sertoli Cell-Sertoli Cell Junction Signaling	0.52	0.117	#NUM!	A2M,ACTA2,Actn3,CLDN20,CLDN22,CLDN5,CLDN7,ERAS,GUCY1A1,ITGA10,ITGA3,ITGA4,ITGA8,ITGB4,MAP2K7,MAP3K11,MAP3K15,MAPK10,MAPK11,NECTIN2,PLS1,PRKG2,RASD1,TUBB4A
Pregnenolone Biosynthesis	0.517	0.148	#NUM!	CYP2B6,CYP2E1,CYP46A1,CYP7B1
Gap Junction Signaling	0.506	0.116	#NUM!	ACTA2,ADCY1,ERAS,GJA4,GJA5,GRIA4,GUCY1A1,NOTUM,NPR1,PIK3C2A,PIK3C2B,PIK3CB,PIK3R3,PIK3R5,PRKCH,PRKCI,PRKCZ,PRKD1,PRKG2,RASD1,SMARCC2,SOS1,TUBB4A
cAMP-mediated signaling	0.504	0.115	-0.6	ADCY1,ADRA2A,ADRB3,AGTR2,AKAP5,CAMK2A,CNGB3,CNR1,CREB3L4,CREM,DUSP4,ENPP6,GNAO1,GRM6,GUCY1A1,HTR1D,MC1R,PDE2A,PDE4C,PKIA,PTGIR,RAP1GAP,RAPGEF4,RGS18,RGS7,S1PR1,SMPDL3B
Estrogen-Dependent Breast Cancer Signaling	0.503	0.125	1.134	CREB3L4,ERAS,PIK3C2A,PIK3C2B,PIK3CB,PIK3R3,PIK3R5,RASD1,STAT5A,TERT
Mitochondrial L-carnitine Shuttle Pathway	0.503	0.158	#NUM!	CPT1B,CPT1C,SLC27A3
DNA damage-induced 14-3-3σ Signaling	0.503	0.158	#NUM!	ATR,CCNE2,HUS1
Interferon Signaling	0.502	0.139	1.342	IFIT1,IFIT3,IFNGR2,OAS1,TYK2
Assembly of RNA Polymerase I Complex	0.498	0.182	#NUM!	POLR1A,POLR1B
Ketogenesis	0.498	0.182	#NUM!	BDH1,BDH2
Pentose Phosphate Pathway	0.498	0.182	#NUM!	G6PD,RPE
Hepatic Cholestasis	0.491	0.116	#NUM!	ABCB1,ADCY1,CD14,CSF2,CYP7B1,FASLG,GUCY1A1,IL12A,Il31,MAPK10,NGFR,NR1H4,PRKCH,PRKCI,PRKCZ,PRKD1,SLCO1C1,TIRAP,TNFRSF11B,TNFRSF1B,TNFSF10,TNFSF8
3-phosphoinositide Degradation	0.491	0.116	1.5	DUSP2,DUSP4,EPHX2,MTMR1,NUDT11,NUDT12,NUDT14,NUDT15,PALD1,PLPP7,PPFIA2,PPFIBP2,PPM1L,PPP1R14C,PPP1R1B,PPP1R3D,PPP1R8,PPP2R2B,PTPN6,PXYLP1,SACM1L,SSH1
ATM Signaling	0.485	0.121	0.632	ATR,BRAT1,CHEK1,CHEK2,CREB3L4,FANCD2,MAPK10,MAPK11,PPM1L,PPP2R2B,SMC1B,SUV39H1
Aldosterone Signaling in Epithelial Cells	0.484	0.117	0.577	Dnajb3,DNAJB5,DNAJC16,DNAJC17,DNAJC27,HSPB2,KCNMA1,NOTUM,PIK3C2A,PIK3C2B,PIK3CB,PIK3R3,PIK3R5,PRKCH,PRKCI,PRKCZ,PRKD1,SCNN1B,SOS1
Ephrin B Signaling	0.484	0.125	1.633	EFNB3,GNA14,GNA15,GNAO1,GNG13,GNG4,GNG7,LIMK1,RAC3
Histidine Degradation VI	0.483	0.143	#NUM!	CYP2B6,CYP2E1,CYP46A1,CYP7B1
ID1 Signaling Pathway	0.481	0.115	0.626	ATAD5,BHLHE22,BIRC5,CDC20,CDKN2A,ERAS,GLI2,HCK,LYN,MAPK11,NGFR,PIK3C2A,PIK3C2B,PIK3CB,PIK3R3,PIK3R5,RAP1GAP,RASD1,S100A9,SMAD9,STMN3,TNFRSF11B,TNFRSF1B
14-3-3-mediated Signaling	0.475	0.118	0.577	ERAS,MAPK10,NOTUM,PIK3C2A,PIK3C2B,PIK3CB,PIK3R3,PIK3R5,PRKCH,PRKCI,PRKCZ,PRKD1,RASD1,SNCA,TUBB4A
Superpathway of Methionine Degradation	0.474	0.135	-0.447	CBS/CBSL,MGMT,MRM2,NSUN4,PCCA
Role of IL-17F in Allergic Inflammatory Airway Diseases	0.469	0.13	1.342	CCL4,CREB3L4,CSF2,CXCL10,RPS6KA2,RPS6KA4
2-ketoglutarate Dehydrogenase Complex	0.451	0.25	#NUM!	DHTKD1
Heme Biosynthesis from Uroporphyrinogen-III I	0.451	0.25	#NUM!	UROD
Spermine and Spermidine Degradation I	0.451	0.25	#NUM!	SMOX
Catecholamine Biosynthesis	0.451	0.25	#NUM!	DDC
Phenylethylamine Degradation I	0.451	0.25	#NUM!	AOC2
Methylmalonyl Pathway	0.451	0.25	#NUM!	PCCA
Proline Biosynthesis I	0.451	0.25	#NUM!	PYCR1
Melatonin Degradation II	0.451	0.25	#NUM!	SMOX
Arginine Degradation I (Arginase Pathway)	0.451	0.25	#NUM!	ARG1
Oxidized GTP and dGTP Detoxification	0.451	0.25	#NUM!	RUVBL2
N-acetylglucosamine Degradation II	0.451	0.25	#NUM!	GNPDA1
Phenylalanine Degradation I (Aerobic)	0.451	0.25	#NUM!	PCBD1
Molybdenum Cofactor Biosynthesis	0.451	0.25	#NUM!	MOCS3
Fatty Acid β-oxidation III (Unsaturated, Odd Number)	0.451	0.25	#NUM!	Eci3
Assembly of RNA Polymerase III Complex	0.447	0.167	#NUM!	BRF2,GTF3A
UDP-N-acetyl-D-galactosamine Biosynthesis II	0.447	0.167	#NUM!	GNPDA1,PGM3
Antigen Presentation Pathway	0.446	0.132	#NUM!	CD74,HLA-A,HLA-DMB,HLA-DQA1,HLA-DQB1
Superpathway of Inositol Phosphate Compounds	0.437	0.112	1.789	DUSP2,DUSP4,EPHX2,NUDT11,NUDT12,NUDT14,NUDT15,PALD1,PIK3C2A,PIK3C2B,PIK3CB,PIK3R3,PIK3R5,PLPP7,PPFIA2,PPFIBP2,PPM1L,PPP1R14C,PPP1R1B,PPP1R3D,PPP1R8,PPP2R2B,PTPN6,PXYLP1,SACM1L,SSH1
IL-17 Signaling	0.429	0.113	0.655	CCL17,CSF2,CSF3,CXCL3,ERAS,FASLG,IL12A,Il31,MAP2K6,MAPK10,MAPK11,MMP3,PIK3C2A,PIK3C2B,PIK3CB,PIK3R3,PIK3R5,RASD1,TNFRSF11B,TNFSF10,TNFSF8
Caveolar-mediated Endocytosis Signaling	0.428	0.12	#NUM!	ACTA2,DYRK3,HLA-A,ITGA10,ITGA3,ITGA4,ITGA8,ITGB4,ZBTB12
Glutamate Receptor Signaling	0.426	0.121	#NUM!	GNG13,GNG4,GNG7,GRIA4,GRIN2D,GRM6,PICK1,SLC1A7
Ubiquinol-10 Biosynthesis (Eukaryotic)	0.423	0.133	#NUM!	CYP2B6,CYP2E1,CYP46A1,CYP7B1
Cholesterol Biosynthesis I	0.402	0.154	#NUM!	CYP51A1,SC5D
Cholesterol Biosynthesis II (via 24,25-dihydrolanosterol)	0.402	0.154	#NUM!	CYP51A1,SC5D
Cholesterol Biosynthesis III (via Desmosterol)	0.402	0.154	#NUM!	CYP51A1,SC5D
PDGF Signaling	0.398	0.116	0	ERAS,JAK3,PIK3C2A,PIK3C2B,PIK3CB,PIK3R3,PIK3R5,RASD1,SOS1,TYK2
The Visual Cycle	0.396	0.136	#NUM!	Akr1b10,LRAT,RDH11
Methionine Degradation I (to Homocysteine)	0.396	0.136	#NUM!	MGMT,MRM2,NSUN4
MYC Mediated Apoptosis Signaling	0.38	0.12	-1.633	ADRB3,CDKN2A,FASLG,NGFR,TNFRSF11B,TNFRSF1B
Maturity Onset Diabetes of Young (MODY) Signaling	0.378	0.115	#NUM!	ADIPOQ,APOL2,CACNA1A,CACNA1D,CACNA2D2,CACNA2D3,CACNB1,CACNB2,CEL
Arsenate Detoxification I (Glutaredoxin)	0.376	0.2	#NUM!	AS3MT
Proline Biosynthesis II (from Arginine)	0.376	0.2	#NUM!	PYCR1
Protein Citrullination	0.376	0.2	#NUM!	PADI4
Pentose Phosphate Pathway (Oxidative Branch)	0.376	0.2	#NUM!	G6PD
Serine Biosynthesis	0.376	0.2	#NUM!	PSAT1
CMP-N-acetylneuraminate Biosynthesis I (Eukaryotes)	0.376	0.2	#NUM!	CMAS
Myo-inositol Biosynthesis	0.376	0.2	#NUM!	IMPA2
2-oxobutanoate Degradation I	0.376	0.2	#NUM!	PCCA
Trans, trans-farnesyl Diphosphate Biosynthesis	0.376	0.2	#NUM!	IDI1
Citrulline-Nitric Oxide Cycle	0.376	0.2	#NUM!	ASL
Rapoport-Luebering Glycolytic Shunt	0.376	0.2	#NUM!	TIGAR
Tyrosine Degradation I	0.376	0.2	#NUM!	HGD
Glutamate Degradation III (via 4-aminobutyrate)	0.376	0.2	#NUM!	ALDH5A1
Mechanisms of Viral Exit from Host Cells	0.375	0.122	#NUM!	ACTA2,PRKCH,PRKCI,PRKCZ,PRKD1
Agrin Interactions at Neuromuscular Junction	0.373	0.116	1.633	ACTA2,ERAS,ITGA4,MAPK10,MUSK,PAK3,RAC3,RASD1
IL-13 Signaling Pathway	0.371	0.112	0.832	ARG1,CD36,HCK,IL13RA2,LYN,MAPK11,PIK3C2A,PIK3C2B,PIK3CB,PIK3R3,PIK3R5,POSTN,TYK2
Semaphorin Signaling in Neurons	0.367	0.117	#NUM!	FES,LIMK1,LIMK2,MET,PAK3,RAC3,RHOBTB2
Thyroid Cancer Signaling	0.363	0.114	1	ERAS,GDNF,PIK3C2A,PIK3C2B,PIK3CB,PIK3R3,PIK3R5,RASD1,RET
Role of IL-17A in Psoriasis	0.363	0.143	#NUM!	CXCL3,S100A9
Phenylalanine Degradation IV (Mammalian, via Side Chain)	0.363	0.143	#NUM!	SLC27A3,SMOX
Chemokine Signaling	0.363	0.114	0.816	CAMK2A,CCL4,ERAS,LIMK1,LIMK2,MAPK11,NOX1,PTK2B,RASD1
Airway Pathology in Chronic Obstructive Pulmonary Disease	0.359	0.111	#NUM!	CSF2,CXCL3,FASLG,FGF1,FGF11,FGF12,FGF21,FGF9,IL12A,Il31,PRTN3,TNFSF10,TNFSF8
IL-12 Signaling and Production in Macrophages	0.358	0.11	#NUM!	IL12A,IL12RB1,MAPK10,MAPK11,PIK3C2A,PIK3C2B,PIK3CB,PIK3R3,PIK3R5,PRKCH,PRKCI,PRKCZ,PRKD1,SERPINA1,ZNF668
D-myo-inositol-5-phosphate Metabolism	0.347	0.108	1.807	DUSP2,DUSP4,EPHX2,NUDT11,NUDT12,NUDT14,NUDT15,PALD1,PLPP7,PPFIA2,PPFIBP2,PPM1L,PPP1R14C,PPP1R1B,PPP1R3D,PPP1R8,PPP2R2B,PTPN6,PXYLP1,SACM1L,SSH1
Cholecystokinin/Gastrin-mediated Signaling	0.346	0.11	0.333	CREM,ERAS,MAP2K6,MAPK10,PRKCH,PRKCI,PRKCZ,PRKD1,PTK2B,RAC3,RASD1,RHOBTB2,SOS1
Inhibition of Angiogenesis by TSP1	0.346	0.121	#NUM!	CD36,GUCY1A1,MAPK10,MAPK11
Tumoricidal Function of Hepatic Natural Killer Cells	0.338	0.125	#NUM!	CASP7,FASLG,LYVE1
Role of MAPK Signaling in the Pathogenesis of Influenza	0.333	0.111	#NUM!	CXCL10,ERAS,MAP2K6,MAP2K7,MAPK10,MAPK11,PLA2G5,PLA2G7,RASD1
NAD Signaling Pathway	0.331	0.108	0	CD38,HGF,LDHD,NADSYN1,NMNAT1,Nmnat3,NUDT12,PARP10,PIK3C2A,PIK3C2B,PIK3CB,PIK3R3,PIK3R5,PPARGC1A,SIRT4,SLC29A2
Arginine Biosynthesis IV	0.318	0.167	#NUM!	ASL
Chondroitin and Dermatan Biosynthesis	0.318	0.167	#NUM!	CHSY1
Serotonin and Melatonin Biosynthesis	0.318	0.167	#NUM!	DDC
Pentose Phosphate Pathway (Non-oxidative Branch)	0.318	0.167	#NUM!	RPE
Glycine Cleavage Complex	0.318	0.167	#NUM!	GLDC
Selenocysteine Biosynthesis II (Archaea and Eukaryotes)	0.318	0.167	#NUM!	SEPSECS
Zymosterol Biosynthesis	0.318	0.167	#NUM!	CYP51A1
Estrogen Biosynthesis	0.314	0.114	-0.447	CYP1B1,CYP2B6,CYP2E1,CYP2F1,CYP51A1
Actin Nucleation by ARP-WASP Complex	0.313	0.109	#NUM!	ERAS,ITGA10,ITGA3,ITGA4,ITGA8,ITGB4,RAC3,RASD1,RHOBTB2,SOS1
PTEN Signaling	0.31	0.107	0.632	ERAS,FASLG,FLT1,ITGA10,ITGA3,ITGA4,ITGA8,ITGB4,NGFR,PIK3CB,PIK3R3,PIK3R5,PRKCZ,RAC3,RASD1,SOS1
Sumoylation Pathway	0.309	0.108	1.414	ARHGDIG,DNMT3A,FASLG,MAPK10,PML,RAC3,RFC4,RHOBTB2,RPA1,SENP1,SNCA
Retinol Biosynthesis	0.297	0.111	0.447	Akr1b10,CEL,LIPG,LRAT,RDH11
mTOR Signaling	0.292	0.105	1	DGKZ,ERAS,PIK3C2A,PIK3C2B,PIK3CB,PIK3R3,PIK3R5,PLD2,PLD4,PPM1L,PPP2R2B,PRKCH,PRKCI,PRKCZ,PRKD1,PRR5L,RAC3,RASD1,RHOBTB2,RPS28,RPS6KA2,RPS6KA4
IL-17A Signaling in Gastric Cells	0.289	0.115	#NUM!	CXCL10,MAPK10,MAPK11
Role of JAK1, JAK2 and TYK2 in Interferon Signaling	0.289	0.115	#NUM!	IFNGR2,PTPN6,TYK2
Role of Macrophages, Fibroblasts and Endothelial Cells in Rheumatoid Arthritis	0.286	0.104	#NUM!	CAMK2A,CREB3L4,CSF2,ERAS,F2RL1,FZD9,GNAO1,IGKC,IL7,MAP2K6,MAP2K7,MMP3,NGFR,NOTUM,PIK3C2A,PIK3C2B,PIK3CB,PIK3R3,PIK3R5,PRKCH,PRKCI,PRKCZ,PRKD1,RASD1,SFRP4,SFRP5,TNFRSF11B,TNFRSF1B,WIF1,WNT10A,WNT10B,WNT2,WNT2B,WNT4
tRNA Splicing	0.28	0.109	-0.447	ENPP6,PDE2A,PDE4C,SMPDL3B,TSEN54
Mitotic Roles of Polo-Like Kinase	0.273	0.106	#NUM!	CDC20,CHEK2,KIF23,PLK1,PPM1L,PPP2R2B,PRC1
Phospholipases	0.273	0.106	1.89	LIPG,NOTUM,PLA1A,PLA2G5,PLA2G7,PLD2,PLD4
Superpathway of Serine and Glycine Biosynthesis I	0.272	0.143	#NUM!	PSAT1
Thioredoxin Pathway	0.272	0.143	#NUM!	TXNRD2
Phosphatidylcholine Biosynthesis I	0.272	0.143	#NUM!	PHKA1
Ceramide Degradation	0.272	0.143	#NUM!	ASAH2
Glycogen Biosynthesis II (from UDP-D-Glucose)	0.272	0.143	#NUM!	GYS1
Leptin Signaling in Obesity	0.271	0.105	0.447	ADCY1,GUCY1A1,NOTUM,PIK3C2A,PIK3C2B,PIK3CB,PIK3R3,PIK3R5
Dermatan Sulfate Degradation (Metazoa)	0.269	0.118	#NUM!	CEMIP,IDUA
Role of Hypercytokinemia/hyperchemokinemia in the Pathogenesis of Influenza	0.268	0.105	0.333	AREG,CCL4,CXCL10,CXCL3,IFIT3,IL12A,OAS1,S1PR1,TYK2
Glutathione Redox Reactions I	0.268	0.111	#NUM!	GSTM2,GSTT2/GSTT2B,MGST2
Death Receptor Signaling	0.266	0.104	-1.897	ACTA2,CASP7,FASLG,HSPB2,LIMK1,MAP2K7,PARP10,TNFRSF1B,TNFRSF21,TNFSF10
iNOS Signaling	0.264	0.106	0	CD14,IFNGR2,JAK3,MAPK11,TYK2
Oxidative Ethanol Degradation III	0.249	0.104	#NUM!	ALDH1A3,CYP2B6,Cyp2c23,CYP2E1,CYP2F1
Notch Signaling	0.249	0.105	#NUM!	DTX2,HES7,LFNG,NOTCH4
Androgen Biosynthesis	0.244	0.111	#NUM!	SRD5A1,SRD5A2
Bile Acid Biosynthesis, Neutral Pathway	0.244	0.111	#NUM!	Akr1c12/Akr1c13,Akr1cl
Phosphatidylethanolamine Biosynthesis II	0.234	0.125	#NUM!	SELENOI
Sphingomyelin Metabolism	0.234	0.125	#NUM!	SMPD4
Sphingosine and Sphingosine-1-phosphate Metabolism	0.203	0.111	#NUM!	ASAH2
Leucine Degradation I	0.203	0.111	#NUM!	IVD
Heme Biosynthesis II	0.203	0.111	#NUM!	UROD
CSDE1 Signaling Pathway	0	0.0179	#NUM!	PIWIL2
Pyroptosis Signaling Pathway	0	0.0753	-0.378	GBP2,GSDME,MAPK11,NGFR,NLRP12,TNFRSF11B,TNFRSF1B
CLEAR Signaling Pathway	0	0.102	0.928	ATP6V0E2,BLOC1S3,CLN3,CREB3L4,ERAS,FGF21,FLT1,GLMP,HGF,HPS5,MAPK11,MITF,NGFR,NR1H4,PML,PPARGC1A,PPM1L,PPP2R2B,PRKCH,PRKCI,PRKCZ,PRKD1,PRKN,RASD1,SGSH,TNFRSF11B,TNFRSF1B,VPS18,WDR59
Glucocorticoid Receptor Signaling	0	0.0845	#NUM!	A2M,AGT,CSF2,CSF2RB,CXCL3,ERAS,ERCC2,GTF2E2,H2-M2,H2-T24,HLA-A,HLA-DMB,HLA-DQA1,HLA-DQB1,IL12RB1,IL13RA2,IL21R,IL22RA2,IL27RA,IL2RA,IL2RG,IL3RA,JAK3,KRT7,MAP2K7,MAPK10,MAPK11,MMP3,NDUFA9,NDUFAF1,PC,PFKFB1,PIK3C2A,PIK3C2B,PIK3CB,PIK3R3,PIK3R5,PLA2G5,RASD1,SLC37A4,SLPI,SMARCC2,SOS1,STAT5A,TAF5L,TAF6L,TFB1M,TYK2
IL-10 Signaling	0	0.0556	#NUM!	CD14,MAP2K6,MAPK11,TYK2
Huntington's Disease Signaling	0	0.0857	0.243	CAPN6,CAPN7,CASP7,CREB3L4,GNA14,GNA15,GNG13,GNG4,GNG7,GPAA1,HDAC9,MAP2K7,PIK3C2A,PIK3C2B,PIK3CB,PIK3R3,PIK3R5,PRKCH,PRKCI,PRKCZ,PRKD1,SNCA,SOS1,STX1B
PPARα/RXRα Activation	0	0.0785	1.667	ADCY1,ADIPOQ,CD36,CPT1B,Cyp2c23,ERAS,GNA14,GNA15,GUCY1A1,MAP2K6,MAP2K7,NOTUM,PPARGC1A,RASD1,SOS1
Mitochondrial Dysfunction	0	0.0828	#NUM!	COX11,COX15,COX7A1,CPT1B,CPT1C,DHODH,DMAC2L,LRRK2,MAPK10,NDUFA9,NDUFAF1,PRKN,SNCA,TXNRD2
FXR/RXR Activation	0	0.103	#NUM!	AGT,AHSG,C3,C4A/C4B,FOXA3,ITIH4,MAPK10,NR1H4,PPARGC1A,SERPINA1,SERPINF2,TF,VTN
PXR/RXR Activation	0	0.0615	-1	ABCB1,CYP2B6,GSTM2,PPARGC1A
Activation of IRF by Cytosolic Pattern Recognition Receptors	0	0.0615	-1	DHX58,IFIH1,MAPK10,ZBP1
Clathrin-mediated Endocytosis Signaling	0	0.0881	#NUM!	ACTA2,AP1B1,F2,FGF1,FGF11,FGF12,FGF21,FGF9,ITGB4,MET,PIK3C2A,PIK3C2B,PIK3CB,PIK3R3,PIK3R5,SERPINA1,TF
Role of RIG1-like Receptors in Antiviral Innate Immunity	0	0.0652	#NUM!	DHX58,IFIH1,TRIM25
Role of PKR in Interferon Induction and Antiviral Response	0	0.0809	1.265	FASLG,IFIH1,IFNGR2,MAP2K6,MAP2K7,MAPK10,MAPK11,NLRP12,PRKRA,TIRAP,TYK2
TREM1 Signaling	0	0.0779	0	CD86,CSF2,CXCL3,NLRP12,NOD2,STAT5A
MIF Regulation of Innate Immunity	0	0.0909	0	CD14,CD74,MAPK10,PLA2G5
Role of NFAT in Regulation of the Immune Response	0	0.0426	-0.229	AKAP5,CD28,CD4,CD79A,CD86,ERAS,GNA14,GNA15,GNAO1,GNG13,GNG4,GNG7,HLA-A,HLA-DMB,HLA-DQA1,HLA-DQB1,LYN,PIK3C2A,PIK3C2B,PIK3CB,PIK3R3,PIK3R5,RASD1,SOS1,Trbc1
CCR5 Signaling in Macrophages	0	0.0481	0.378	CACNA1A,CACNA1D,CACNA1G,CACNA2D2,CACNA2D3,CACNB1,CACNB2,CCL4,CD4,FASLG,GNA14,GNA15,GNAO1,GNG13,GNG4,GNG7,MAPK10,MAPK11,PRKCH,PRKCI,PRKCZ,PRKD1,PTK2B,Trbc1
Calcium-induced T Lymphocyte Apoptosis	0	0.0241	0	ATP2A1,CD4,HLA-A,HLA-DMB,HLA-DQA1,HLA-DQB1,PRKCH,PRKCI,PRKCZ,PRKD1,Trbc1
Cytotoxic T Lymphocyte-mediated Apoptosis of Target Cells	0	0.0118	#NUM!	CASP7,FASLG,HLA-A,Trbc1,ZBTB12
CD27 Signaling in Lymphocytes	0	0.0877	1.342	MAP2K6,MAP2K7,MAP3K11,MAP3K15,MAPK10
Lymphotoxin β Receptor Signaling	0	0.0909	0.447	PIK3C2A,PIK3C2B,PIK3CB,PIK3R3,PIK3R5
4-1BB Signaling in T Lymphocytes	0	0.0588	#NUM!	MAPK10,MAPK11
CTLA4 Signaling in Cytotoxic T Lymphocytes	0	0.0293	#NUM!	AP1B1,CD28,CD86,HLA-A,PIK3C2A,PIK3C2B,PIK3CB,PIK3R3,PIK3R5,PPM1L,PPP2R2B,PTPN6,Trbc1,ZBTB12
Induction of Apoptosis by HIV1	0	0.0923	0	FASLG,MAP2K7,MAPK10,NGFR,TNFRSF11B,TNFRSF1B
B Cell Activating Factor Signaling	0	0.0698	#NUM!	MAP2K7,MAPK10,MAPK11
Airway Inflammation in Asthma	0	0.0909	#NUM!	CSF2,IFNGR2,IL12A
T Helper Cell Differentiation	0	0.0362	#NUM!	CD28,CD86,HLA-A,HLA-DMB,HLA-DQA1,HLA-DQB1,IFNGR2,IL12A,IL12RB1,IL21R,IL2RA,IL2RG,NGFR,RORC,TNFRSF11B,TNFRSF1B,Trbc1
CD28 Signaling in T Helper Cells	0	0.0291	1.265	CD28,CD4,CD86,HLA-A,HLA-DMB,HLA-DQA1,HLA-DQB1,MAPK10,PIK3C2A,PIK3C2B,PIK3CB,PIK3R3,PIK3R5,PTPN6,Trbc1
IL-15 Signaling	0	0.0304	0.535	CSF2,ERAS,Igha,IGKC,IL2RG,JAK3,MAPK11,PIK3C2A,PIK3C2B,PIK3CB,PIK3R3,PIK3R5,RAC3,RASD1,STAT5A,TYK2
Role of Cytokines in Mediating Communication between Immune Cells	0	0.0741	#NUM!	CSF2,CSF3,IL12A,IL27
Dendritic Cell Maturation	0	0.0475	0	CD1D,CD86,COL10A1,COL11A2,COL2A1,COL5A3,CREB3L4,CSF2,FSCN2,HLA-A,HLA-DMB,HLA-DQA1,HLA-DQB1,IGKC,IL12A,MAPK10,MAPK11,NGFR,NOTUM,PIK3C2A,PIK3C2B,PIK3CB,PIK3R3,PIK3R5,TNFRSF11B,TNFRSF1B,Trbc1,ZBTB12
Cardiomyocyte Differentiation via BMP Receptors	0	0.0909	#NUM!	BMP7,SMAD9
ICOS-ICOSL Signaling in T Helper Cells	0	0.0337	-0.258	CAMK2A,CD28,CD4,CD86,GAB2,HLA-A,HLA-DMB,HLA-DQA1,HLA-DQB1,IL2RA,IL2RG,PIK3C2A,PIK3C2B,PIK3CB,PIK3R3,PIK3R5,Trbc1
Lipid Antigen Presentation by CD1	0	0.00721	#NUM!	AP1B1,CD1D,Trbc1
Polyamine Regulation in Colon Cancer	0	0.069	2	ARG1,MAP2K6,MAP2K7,SMOX
DNA Methylation and Transcriptional Repression Signaling	0	0.0882	#NUM!	DNMT3A,DNMT3B,SAP18
Role of OCT4 in Mammalian Embryonic Stem Cell Pluripotency	0	0.0652	#NUM!	PPP1R8,SPP1,TDRD7
Type I Diabetes Mellitus Signaling	0	0.0375	0.333	CD28,CD86,CPE,FASLG,HLA-A,HLA-DMB,HLA-DQA1,HLA-DQB1,IFNGR2,IL12A,MAP2K6,MAP2K7,MAPK10,MAPK11,NGFR,SOCS7,TNFRSF11B,TNFRSF1B,Trbc1
Allograft Rejection Signaling	0	0.0234	#NUM!	CD28,CD86,FASLG,H2-M2,H2-T24,HLA-A,HLA-DMB,HLA-DQA1,HLA-DQB1,IGKC,Trbc1
Autoimmune Thyroid Disease Signaling	0	0.0199	#NUM!	CD28,CD86,FASLG,HLA-A,HLA-DMB,HLA-DQA1,HLA-DQB1,IGKC,Trbc1
Graft-versus-Host Disease Signaling	0	0.018	#NUM!	CD28,CD86,FASLG,HLA-A,HLA-DMB,HLA-DQA1,HLA-DQB1,Trbc1
ERK5 Signaling	0	0.0946	1	CREB3L4,CTF1,ERAS,RASD1,RPS6KA2,RPS6KA4,SH2D2A
Communication between Innate and Adaptive Immune Cells	0	0.014	#NUM!	CCL4,CD28,CD4,CD79A,CD86,CSF2,CXCL10,HLA-A,Igha,IGKC,IL12A,Trbc1,ZBTB12
Systemic Lupus Erythematosus Signaling	0	0.0338	#NUM!	BDKRB2,CD28,CD79A,CD86,CREM,ERAS,HLA-A,IGKC,LYN,PIK3C2A,PIK3C2B,PIK3CB,PIK3R3,PIK3R5,PIM2,PTPN6,RASD1,SNRNP35,SNRPN,SOS1,Trbc1
CDC42 Signaling	0	0.0446	0.632	EXOC8,H2-M2,H2-T24,HLA-A,HLA-DMB,HLA-DQA1,HLA-DQB1,ITGA10,ITGA3,ITGA4,ITGA8,ITGB4,LIMK1,LIMK2,MAP3K11,MAPK10,MAPK11,MYL4,MYL6B,MYL7,PAK3,PARD6A,PRKCI,PRKCZ,Trbc1
FAK Signaling	0	0.0763	1.463	ADGRA1,ADGRB2,ADGRF4,ADGRV1,ADRA1A,ADRA1B,ADRA2A,ADRB3,Agtr1b,AGTR2,AVPR1A,BCAR3,BDKRB2,CAPN6,CAPN7,CCR9,CDH5,CNR1,COL10A1,COL11A2,COL2A1,COL5A3,CSF2RB,CYSLTR1,EDNRB,EFNB3,ERAS,ETV4,F2RL1,F2RL2,FLT1,FZD9,GALR2,GPR132,GPR135,GPR162,GPR35,GPR4,GPR45,GPR61,GPR62,GPR85,GRM6,HTR1D,IL12RB1,IL13RA2,IL21R,IL22RA2,IL27RA,IL2RA,IL2RG,IL3RA,ITGA10,ITGA3,ITGA4,ITGA8,ITGB4,KLF8,LPAR3,MAPK10,MAPK11,MC1R,MET,P2…
EIF2 Signaling	0	0.0543	-0.707	ACTA2,ERAS,MYCN,PIK3C2A,PIK3C2B,PIK3CB,PIK3R3,PIK3R5,RASD1,RPL5,RPS28,SOS1
April Mediated Signaling	0	0.0714	#NUM!	MAP2K7,MAPK10,MAPK11
Retinoic acid Mediated Apoptosis Signaling	0	0.0667	#NUM!	CRABP1,CRABP2,PARP10,TNFSF10
RHOA Signaling	0	0.0894	-0.905	ACTA2,CDC42EP3,LIMK1,LIMK2,LPAR3,MYL4,MYL6B,MYL7,PFN2,PTK2B,RHPN2
Phospholipase C Signaling	0	0.0503	0.229	ADCY1,ARHGEF15,ARHGEF18,ARHGEF9,CD79A,CREB3L4,ERAS,GNG13,GNG4,GNG7,GUCY1A1,HDAC9,IGKC,ITGA10,ITGA3,ITGA4,ITGA8,ITGB4,LYN,MYL4,MYL6B,MYL7,PLA2G5,PLD2,PLD4,PRKCH,PRKCI,PRKCZ,PRKD1,RAC3,RASD1,RHOBTB2,SOS1,Trbc1
Altered T Cell and B Cell Signaling in Rheumatoid Arthritis	0	0.0327	#NUM!	CCL21,CD28,CD79A,CD86,CSF2,CXCL13,FASLG,HLA-A,HLA-DMB,HLA-DQA1,HLA-DQB1,IL12A,PRTN3,SLAMF1,SPP1,Trbc1
Atherosclerosis Signaling	0	0.0853	#NUM!	CD36,COL10A1,COL11A2,COL2A1,COL5A3,ITGA4,MMP3,PLA2G5,PLA2G7,SELPLG,SERPINA1
Protein Kinase A Signaling	0	0.0993	0.365	ACP4,ADCY1,AKAP5,CAMK2A,CNGB3,CREB3L4,CREM,DUSP18,DUSP2,DUSP22,DUSP4,ENPP6,GNG13,GNG4,GNG7,GUCY1A1,GYS1,MYL4,MYL6B,MYL7,NGFR,NOTUM,PDE2A,PDE4C,PPP1R14C,PPP1R1B,PPP1R3D,PRKCH,PRKCI,PRKCZ,PRKD1,PTCH1,PTCH2,PTK2B,PTP4A1,PTPN6,PTPRE,PYGM,SMPDL3B,TNNI2
Regulation of eIF4 and p70S6K Signaling	0	0.101	0.302	ERAS,ITGA10,ITGA3,ITGA4,ITGA8,ITGB4,MAPK11,PIK3C2A,PIK3C2B,PIK3CB,PIK3R3,PIK3R5,PPM1L,PPP2R2B,PRKCZ,RASD1,RPS28,SOS1
Granzyme B Signaling	0	0.0625	#NUM!	PRKDC
Neuroprotective Role of THOP1 in Alzheimer's Disease	0	0.1	-0.378	AGT,ECE2,HLA-A,MME,NTS,PRSS23,Prss30,PRSS53,PRSS57,PRTN3,SERPINA3,ST14
Regulation of IL-2 Expression in Activated and Anergic T Lymphocytes	0	0.0152	0.378	CD28,ERAS,MAP2K7,MAPK10,RASD1,SOS1,Trbc1
Role of WNT/GSK-3β Signaling in the Pathogenesis of Influenza	0	0.0769	-0.816	FZD9,WNT10A,WNT10B,WNT2,WNT2B,WNT4
TWEAK Signaling	0	0.027	#NUM!	CASP7
NUR77 Signaling in T Lymphocytes	0	0.0321	-0.333	CD28,CD86,FASLG,H2-M2,H2-T24,HDAC9,HLA-A,HLA-DMB,HLA-DQA1,HLA-DQB1,PRKCH,PRKCI,PRKCZ,PRKD1,TNFSF10,Trbc1
PKCθ Signaling in T Lymphocytes	0	0.0486	0.243	CACNA1A,CACNA1D,CACNA1G,CACNA2D2,CACNA2D3,CACNB1,CACNB2,CAMK2A,CD28,CD4,CD86,ERAS,HLA-A,HLA-DMB,HLA-DQA1,HLA-DQB1,MAP3K11,MAP3K15,PIK3C2A,PIK3C2B,PIK3CB,PIK3R3,PIK3R5,RAC3,RASD1,SOS1,Trbc1
TNFR1 Signaling	0	0.0392	#NUM!	CASP7,PAK3
TNFR2 Signaling	0	0.0312	#NUM!	TNFRSF1B
Role of PI3K/AKT Signaling in the Pathogenesis of Influenza	0	0.0758	0.447	PIK3C2A,PIK3C2B,PIK3CB,PIK3R3,PIK3R5
Antiproliferative Role of TOB in T Cell Signaling	0	0.00704	#NUM!	CCNE2,CD28,Trbc1
OX40 Signaling Pathway	0	0.0193	#NUM!	CD4,H2-M2,H2-T24,HLA-A,HLA-DMB,HLA-DQA1,HLA-DQB1,MAPK10,Trbc1
PI3K Signaling in B Lymphocytes	0	0.0769	0.333	C3,CAMK2A,CD79A,DAPP1,ERAS,LYN,NOTUM,PIK3CB,PRKCI,PRKCZ,RASD1
MIF-mediated Glucocorticoid Regulation	0	0.0833	#NUM!	CD14,CD74,PLA2G5
Assembly of RNA Polymerase II Complex	0	0.08	0	ERCC2,GTF2E2,TAF5L,TAF6L
Spliceosomal Cycle	0	0.102	-1.342	CTNNBL1,DHX16,MAGOHB,SNIP1,YJU2
IL-17A Signaling in Fibroblasts	0	0.0263	#NUM!	MAPK11
Hematopoiesis from Pluripotent Stem Cells	0	0.0181	#NUM!	CD4,CSF2,CSF3,Igha,IGKC,IL12A,IL7,Trbc1
Transcriptional Regulatory Network in Embryonic Stem Cells	0	0.037	#NUM!	OTX1,TRIM24
GADD45 Signaling	0	0.1	1.633	ATR,CCNE2,MAP2K6,MAP2K7,MAPK10,MAPK11
Fatty Acid Activation	0	0.0667	#NUM!	SLC27A3
Thyroid Hormone Metabolism II (via Conjugation and/or Degradation)	0	0.0833	#NUM!	LARGE2,UGT1A4,UGT1A6
Dopamine Degradation	0	0.069	#NUM!	ALDH1A3,SMOX
Chondroitin Sulfate Degradation (Metazoa)	0	0.0625	#NUM!	CEMIP
Glutaryl-CoA Degradation	0	0.05	#NUM!	L3HYPDH
Acyl-CoA Hydrolysis	0	0.0714	#NUM!	MBLAC2
γ-linolenate Biosynthesis II (Animals)	0	0.0526	#NUM!	SLC27A3
Oleate Biosynthesis II (Animals)	0	0.0833	#NUM!	Scd4
Calcium Transport I	0	0.1	#NUM!	ATP2A1
Superpathway of D-myo-inositol (1,4,5)-trisphosphate Metabolism	0	0.0455	#NUM!	IMPA2
α-tocopherol Degradation	0	0.1	#NUM!	CYP4F12
Serotonin Degradation	0	0.0923	0.816	ADH7,ALDH1A3,LARGE2,SMOX,UGT1A4,UGT1A6
TCA Cycle II (Eukaryotic)	0	0.0435	#NUM!	DHTKD1
D-myo-inositol (1,4,5)-trisphosphate Degradation	0	0.0625	#NUM!	IMPA2
Tryptophan Degradation III (Eukaryotic)	0	0.037	#NUM!	L3HYPDH
Glycolysis I	0	0.0385	#NUM!	ENO1
Gluconeogenesis I	0	0.0769	#NUM!	ENO1,ME2
Histamine Degradation	0	0.0526	#NUM!	ALDH1A3
Dolichyl-diphosphooligosaccharide Biosynthesis	0	0.1	#NUM!	ALG1
Noradrenaline and Adrenaline Degradation	0	0.0857	#NUM!	ADH7,ALDH1A3,SMOX
Putrescine Degradation III	0	0.1	#NUM!	ALDH1A3,SMOX
Fatty Acid α-oxidation	0	0.0526	#NUM!	ALDH1A3
Ethanol Degradation IV	0	0.0455	#NUM!	ALDH1A3
Ethanol Degradation II	0	0.0625	#NUM!	ADH7,ALDH1A3
Fatty Acid β-oxidation I	0	0.0833	#NUM!	Eci3,IVD,SLC27A3
Epithelial Adherens Junction Signaling	0	0.103	0	CDH2,ERAS,FARP2,FGF1,HGF,KIF23,LIMK1,LIMK2,MET,MYL7,NECTIN2,NOTCH4,PAK3,PPM1L,PPP2R2B,RASD1
Remodeling of Epithelial Adherens Junctions	0	0.0735	#NUM!	ACTA2,Actn3,HGF,MET,TUBB4A
TEC Kinase Signaling	0	0.0624	0.426	ACTA2,FASLG,GNA14,GNA15,GNAO1,GNG13,GNG4,GNG7,HCK,ITGA10,ITGA3,ITGA4,ITGA8,ITGB4,JAK3,LYN,MAPK10,PAK3,PIK3C2A,PIK3C2B,PIK3CB,PIK3R3,PIK3R5,PRKCH,PRKCI,PRKCZ,PRKD1,PTK2B,RAC3,RHOBTB2,STAT5A,TEC,TNFRSF21,TNFSF10,Trbc1,TYK2
Oxidative Phosphorylation	0	0.0545	-0.447	COX11,COX15,COX7A1,DMAC2L,ENOX1,NDUFA9
Adipogenesis pathway	0	0.0821	#NUM!	BMP7,ERCC2,FABP4,FBXW7,FGF1,FZD9,HDAC9,PER2,SAP18,SMAD9,WNT10B
HIPPO signaling	0	0.0941	-0.447	DLG2,PATJ,PPM1L,PPP1R14C,PPP1R3D,PPP2R2B,TEAD3,TEAD4
Unfolded protein response	0	0.0556	#NUM!	DNAJB5,DNAJC16,DNAJC17,MAP2K7,SYVN1
WNT/Ca+ pathway	0	0.0758	1.342	CAMK2A,CREB3L4,FZD9,NOTUM,ROR1
Toll-like Receptor Signaling	0	0.0769	0	CD14,IL12A,MAP2K6,MAPK11,TICAM2,TIRAP
SAPK/JNK Signaling	0	0.0359	0.832	DUSP4,ERAS,GNG13,GNG4,GNG7,MAP2K7,MAP3K11,MAPK10,PIK3C2A,PIK3C2B,PIK3CB,PIK3R3,PIK3R5,RAC3,RASD1,SH2D2A,SOS1,Trbc1
Protein Ubiquitination Pathway	0	0.0766	#NUM!	CDC20,Dnajb3,DNAJB5,DNAJC16,DNAJC17,DNAJC27,FBXW7,HLA-A,HSPB2,PRKN,SMURF1,UBE2Q1,UBE3B,UCHL1,USP18,USP20,USP33,USP42,USP49,USP50,ZBTB12
Amyloid Processing	0	0.0588	#NUM!	CAPN6,CAPN7,MAPK11
Endoplasmic Reticulum Stress Pathway	0	0.0476	#NUM!	CASP7
B Cell Receptor Signaling	0	0.0396	0.447	BCL2A1,CAMK2A,CD79A,CREB3L4,DAPP1,ERAS,GAB2,Igha,IGKC,LYN,MAP2K6,MAP2K7,MAP3K11,MAP3K15,MAPK11,PIK3C2A,PIK3C2B,PIK3CB,PIK3R3,PIK3R5,POU2F2,PTK2B,PTPN6,RASD1,SOS1
Insulin Receptor Signaling	0	0.1	0	ERAS,GYS1,PIK3C2A,PIK3C2B,PIK3CB,PIK3R3,PIK3R5,PPP1R14C,PPP1R3D,PRKCI,PRKCZ,RASD1,SCNN1B,SOS1
PPAR Signaling	0	0.0748	1.633	ERAS,NGFR,PPARGC1A,RASD1,SOS1,STAT5A,TNFRSF11B,TNFRSF1B
p38 MAPK Signaling	0	0.075	1.89	CREB3L4,FASLG,HSPB2,MAP2K6,MAPK11,PLA2G5,RPS6KA2,RPS6KA4,TNFRSF1B
Apoptosis Signaling	0	0.0865	-0.378	BCL2A1,CAPN6,CAPN7,CASP7,ERAS,FASLG,MAP2K7,RASD1,TNFRSF1B
NF-κB Signaling	0	0.0281	-0.277	ERAS,FLT1,MAP2K6,MAP2K7,NGFR,PIK3C2A,PIK3C2B,PIK3CB,PIK3R3,PIK3R5,PRKCZ,RASD1,TIRAP,TNFRSF11B,TNFRSF1B,Trbc1
Hypoxia Signaling in the Cardiovascular System	0	0.0526	#NUM!	CREB3L4,EDN1,HIF1AN,UBE2Q1
T Cell Receptor Signaling	0	0.0416	-0.2	CD28,CD4,CD86,CSF2,ERAS,H2-M2,H2-T24,HLA-A,HLA-DMB,HLA-DQA1,HLA-DQB1,ITGA3,MAP2K6,MAP2K7,MAPK11,PIK3C2A,PIK3C2B,PIK3CB,PIK3R3,PIK3R5,PTK2B,PTPN6,RASD1,SOS1,Trbc1
GPCR-Mediated Integration of Enteroendocrine Signaling Exemplified by an L Cell	0	0.0933	-0.816	ADCY1,ADRB3,GAL,GNA14,GNA15,GUCY1A1,NOTUM
Phagosome Maturation	0	0.0755	#NUM!	ATP6V0E2,DYNLT1,GPAA1,HLA-A,NCF1,NOX1,RAC3,STX1B,TUBB4A,VPS18,VPS37B,ZBTB12
Autophagy	0	0.0837	-0.471	ATG14,ATR,CREB3L4,HGF,MAP2K7,MAPK10,NGFR,NOD2,PIK3C2A,PIK3C2B,PIK3CB,PIK3R3,PIK3R5,PPM1L,PPP2R2B,TNFRSF11B,TNFRSF1B,VPS18
Inflammasome pathway	0	0.05	#NUM!	NOD2
Cancer Drug Resistance By Drug Efflux	0	0.0862	#NUM!	ABCB1,ERAS,PIK3CB,PIK3R3,RASD1
Sirtuin Signaling Pathway	0	0.0627	-0.832	AGTRAP,ATG14,ATG16L2,ATG4A,CPT1B,CPT1C,G6PD,LDHD,MYCN,NDUFA9,NDUFAF1,NR1H4,POLR1A,POLR1B,PPARGC1A,PRKDC,SIRT4,SUV39H1
Iron homeostasis signaling pathway	0	0.0803	#NUM!	ATP6V0E2,BMP7,BMP8A,FLVCR1,HBB,HIF3A,JAK3,SLC40A1,STAT5A,TF,TYK2
Th17 Activation Pathway	0	0.0186	0.707	CSF2,IL12A,IL12RB1,IL21R,IRF4,JAK3,RORC,Trbc1,TYK2
SPINK1 Pancreatic Cancer Pathway	0	0.0862	-1.342	CPE,CPM,CTRB2,F2RL1,MMP12
Endocannabinoid Cancer Inhibition Pathway	0	0.102	-0.535	ADCY1,CASP7,CCNE2,CNR1,CREB3L4,GNAO1,GUCY1A1,MAP2K6,MAP2K7,PIK3C2A,PIK3C2B,PIK3CB,PIK3R3,PIK3R5,SMPD4
Apelin Cardiac Fibroblast Signaling Pathway	0	0.0435	#NUM!	APLN
BAG2 Signaling Pathway	0	0.0122	#NUM!	PRKN
FAT10 Cancer Signaling Pathway	0	0.06	#NUM!	NGFR,TNFRSF11B,TNFRSF1B
PFKFB4 Signaling Pathway	0	0.0833	2	CREB3L4,MAP2K6,MAP2K7,PFKFB4
T Cell Exhaustion Signaling Pathway	0	0.0409	-1.291	CD28,CD86,ERAS,HLA-A,HLA-DMB,HLA-DQA1,HLA-DQB1,IL12A,IL12RB1,IRF4,JAK3,MAPK10,PIK3C2A,PIK3C2B,PIK3CB,PIK3R3,PIK3R5,PPM1L,PPP2R2B,PTPN6,RASD1,Trbc1,TYK2
Systemic Lupus Erythematosus In T Cell Signaling Pathway	0	0.0478	0.186	CASP7,CD28,CD86,CREB3L4,CREM,ERAS,FASLG,H2-M2,H2-T24,HLA-A,HLA-DMB,HLA-DQA1,HLA-DQB1,IRF4,MAP2K6,MAP2K7,PIK3C2A,PIK3C2B,PIK3CB,PIK3R3,PIK3R5,PPM1L,PPP2R2B,RAC3,RASD1,RHOBTB2,RORC,SELPLG,SOS1,Trbc1
Systemic Lupus Erythematosus In B Cell Signaling Pathway	0	0.0446	0.365	CD79A,CSF2,ERAS,FASLG,HCK,IFIH1,IFIT3,IFNGR2,Igha,IGKC,IL12A,Il31,LYN,PIK3C2A,PIK3C2B,PIK3CB,PIK3R3,PIK3R5,PIM2,PRKCH,PRKCI,PRKCZ,PRKD1,PTPN6,RAC3,RASD1,RASGRP2,SHE,SOS1,TNFSF10,TNFSF8,TYK2
Inhibition of ARE-Mediated mRNA Degradation Pathway	0	0.0755	-1.155	DIS3,EXOSC9,FASLG,MAPK11,NGFR,PAPOLB,PPM1L,PPP2R2B,TNFRSF11B,TNFRSF1B,TNFSF10,TNFSF8
BEX2 Signaling Pathway	0	0.0864	-0.378	CDH2,LMO2,MAPK10,NGFR,PPM1L,PPP2R2B,SPP1
Necroptosis Signaling Pathway	0	0.0774	-0.577	CAMK2A,CAPN6,CAPN7,FASLG,NGFR,PLA2G5,RBL1,TNFRSF11B,TNFRSF1B,TNFSF10,TYRO3,ZBP1
Coronavirus Pathogenesis Pathway	0	0.0746	-0.258	AGT,CCNE2,E2F2,E2F3,E2F7,FASLG,HDAC9,MAPK10,MAPK11,OAS1,RBL1,RPS28,SUV39H1,TRIM25,TYK2
Coronavirus Replication Pathway	0	0.0444	#NUM!	IFITM5,TUBB4A
Complement System	0	0.0541	#NUM!	C3,C4A/C4B
Eicosanoid Signaling	0	0.0746	#NUM!	CYSLTR1,GGT1,PLA2G5,PLA2G7,PTGIR
Ferroptosis Signaling Pathway	0	0.1	-0.577	CARS1,CBS/CBSL,CHAC1,ERAS,FANCD2,GSS,HMGCR,NOX1,RASD1,RBL1,SLC7A11,TF,TFAP2C
Role of MAPK Signaling in Promoting the Pathogenesis of Influenza	0	0.0804	1	ATP6V0E2,ERAS,MAP2K6,MAP2K7,MAPK10,MAPK11,PLA2G5,PLA2G7,RASD1
Role of MAPK Signaling in Inhibiting the Pathogenesis of Influenza	0	0.0921	1.134	CXCL10,MAP2K6,MAP2K7,MAPK10,MAPK11,PLA2G5,PLA2G7

## Sheet: 工作表1
ADCY1	Arxes1/Arxes2	CACNA1A	CACNA1D	CACNA1G	CACNA2D2	CACNA2D3	CACNB1	CACNB2	CAMK2A	CPE	CREB3L4	GNA14	GNA15	GPAA1	GUCY1A1	HCK	JAK3	LYN	MAFA	MAPK11	NALCN	NOTUM	PC	PCSK2	PIK3C2A	PIK3C2B	PIK3CB	PIK3R3	PIK3R5	PRKCH	PRKCI	PRKCZ	PRKD1	RAPGEF4	SCNN1B	SLC2A3	SLC2A8	SRP68	STAT5A	STX1B	TYK2

## Sheet: 工作表2
gene
ADCY1
Arxes1/Arxes2
CACNA1A
CACNA1D
CACNA1G
CACNA2D2
CACNA2D3
CACNB1
CACNB2
CAMK2A
CPE
CREB3L4
GNA14
GNA15
GPAA1
GUCY1A1
HCK
JAK3
LYN
MAFA
MAPK11
NALCN
NOTUM
PC
PCSK2
PIK3C2A
PIK3C2B
PIK3CB
PIK3R3
PIK3R5
PRKCH
PRKCI
PRKCZ
PRKD1
RAPGEF4
SCNN1B
SLC2A3
SLC2A8
SRP68
STAT5A
STX1B
TYK2
