# Supplementary material for: Single-Cell Transcriptomic Profiles of Lung Pre-Metastatic Niche Reveal Neutrophil and Lymphatic Endothelial Cell Roles in Breast Cancer
Source: Cancers (Basel). 2022 Dec 28;15(1):176. doi: 10.3390/cancers15010176 (PMC9818165; doi:10.3390/cancers15010176)
Supplement: Supplementary file 1 [file cancers-15-00176-s001.zip › Table S19.csv]

gene_name	module	color	kME_M1	kME_grey	kME_M2	kME_M3	kME_M4	kME_M5
Cxcl1	grey	grey	0.206867517914377	0.247661095038043	0.0721282302192928	-0.12240193855091	-0.0935296768819361	-0.21460962139938
Ccl2	grey	grey	0.146220309389738	0.170649873808169	0.0159310663125698	-0.08463122234399	-0.0439975032603054	-0.154619341787398
Ccl7	M2	yellow	0.118196535674047	0.137800492214309	0.0288353602617126	-0.0429440637791454	-0.0847327943005773	-0.141435991309394
Ager	M3	blue	-0.0447060576753999	0.0161162209505957	0.117707706401413	-0.119546327884975	-0.00649079346835347	0.107553559115697
Igfbp5	M4	turquoise	0.00970196493790567	0.2383300760288	0.221245684117094	-0.110006318151438	-0.216500084327511	-0.23539855352603
Ccl11	M4	turquoise	0.00743255315924043	0.266391814180122	0.0457380811447851	-0.0809700475132383	-0.0419626786320643	-0.247368245335571
C3	M4	turquoise	0.0272148387413267	0.280379487758218	0.0942301527401359	-0.0975275825466959	-0.0321364501068228	-0.264148277387063
Ptgs2	grey	grey	0.145455884855142	0.208263243226866	0.0388318327986418	-0.0880704548475977	-0.087657032966249	-0.190418857596753
Postn	M2	yellow	0.00506034288953237	0.196374456726325	-0.0024030128930065	-0.121289177116351	-0.0453038819757999	-0.169669406584943
Cxcl2	grey	grey	0.0962592069986358	0.0926335303033543	0.064820356464882	-0.0436583006261657	-0.0338772340706786	-0.107212400808165
Pi16	M4	turquoise	-0.0838617919839951	0.355831875123208	0.140177900989152	-0.129106302445723	-0.0148945685382884	-0.336856043869593
Mt1	grey	grey	0.296048711005542	0.443821179723584	0.131390081053354	-0.130022898393716	-0.202153248079139	-0.335580795124791
Itih5	M4	turquoise	0.0264347820700009	0.286352394373642	0.0151382342612004	-0.0877760720562388	-0.0428649620638961	-0.235351353088127
Tnfaip6	M4	turquoise	0.210409650943017	0.342265419742869	0.106393966006066	-0.14107562390258	-0.0837397641264081	-0.285429399042137
Lum	M4	turquoise	0.0166703557795418	0.409234729684789	0.0910659399682105	-0.115062201382622	-0.0948049899667682	-0.35671982101598
Sfrp2	grey	grey	0.0117271453179162	0.137804218446167	-0.0042251934778937	-0.0155075062423087	-0.0123450726548189	-0.090765332467365
Tcap	grey	grey	0.142837226595122	0.1665922763502	0.200972726354705	-0.0859627160727039	-0.225963975807665	-0.16013342663781
Ptx3	grey	grey	0.101479843094721	0.12926909182443	0.066975625561484	-0.047279265632948	-0.0571822766353438	-0.138388894861373
Aqp1	grey	grey	-0.00761584650442971	0.27425418665102	0.190865410851804	0.0209041965715333	-0.105375424085056	-0.192247676023259
Cxcl10	grey	grey	0.204643412174849	0.155894021844638	0.101001363467003	-0.0282958878850897	-0.109336630415827	-0.0977146428075852
Has1	M4	turquoise	0.15498680622273	0.294638944640374	0.0876579244199174	-0.117894221597913	-0.0209880088271815	-0.248239715105915
Ifi27l2a	M2	yellow	0.00112043766069439	0.229909795656107	0.0398360809886064	-0.0912274841553372	-0.0545653312637558	-0.167574410668287
Hhip	grey	grey	0.194134366256281	0.296571722048574	0.378760068352659	-0.115602258738142	-0.412937171984495	-0.286229690742146
Dcn	M4	turquoise	-0.0101536967124742	0.551782791052616	0.181898598519695	-0.145227174079451	-0.0998796828128259	-0.526192952190683
Mt2	grey	grey	0.244198657039444	0.404809769193502	0.118633955396596	-0.131564936106835	-0.193403189097363	-0.306815732093249
Dkk2	M2	yellow	-0.00460076858930837	0.187935111850514	-0.00289257316017024	-0.061230851975432	-0.00840068991094641	-0.150844507226312
S100a4	M4	turquoise	-0.0300337430044917	0.255581742687532	0.0490579646070649	-0.0816981645406225	-0.0239744284202338	-0.206167222011957
Ly6a	grey	grey	-0.0519345128582978	0.340797069332145	0.116330160885597	-0.131657887431637	-0.0164571691860138	-0.25881652888434
Rbp4	M4	turquoise	-0.0384767785918958	0.252559669589365	0.114787828553918	-0.011246119817213	-0.17715886467327	-0.271357675548335
Cldn5	M3	blue	0.0826576993907941	0.121754963682377	0.164631494609467	-0.038051514685252	-0.0519531329007143	0.0650665503447947
Pnmt	M3	blue	0.0608175436501354	0.094392033457478	0.132220537052528	-0.0754906559789899	-0.154957447133585	-0.0931856683829911
Acta2	grey	grey	0.0907602323840517	0.167277650382627	0.154249620903812	-0.0894482613852986	-0.204488554947697	-0.1496346490672
Aspn	M4	turquoise	0.116090181245343	0.376982438809224	0.293675403112493	-0.184771560397607	-0.32864964362784	-0.367139234722712
Igfbp6	M4	turquoise	0.01062464480697	0.253053095778572	0.0718542918484746	-0.0198049265476429	-0.25195279104047	-0.187997334338181
Cilp	M2	yellow	0.03698773816049	0.214250836253796	0.0321484923774868	-0.0802646168794388	-0.0133305972836814	-0.185359457499901
Igfbp2	M3	blue	-0.0453805259923048	0.0238653811046416	0.110161775317112	-0.0904275535123391	0.00509534531637881	0.0642522450483209
Cygb	M4	turquoise	-0.0319292472276211	0.386330295147162	0.218178692970876	-0.100952765946623	-0.0617756438707156	-0.380363823943015
Fgl2	M4	turquoise	0.0745414432377389	0.187308910159182	0.044850121546825	-0.0157675758412503	-0.0757948200573271	-0.177666856716426
Prg4	M2	yellow	0.0402071945117413	0.0953710543706387	-0.00354062042665087	-0.0521542454451062	-0.0767854688528415	-0.0786424485123786
C4b	M4	turquoise	0.0610474629300675	0.240880406856974	0.11595839402805	-0.0194210498717439	-0.131545036784404	-0.222723754375936
Col3a1	M4	turquoise	-0.00994177445349701	0.42745972075547	0.220642206604319	-0.096440214809447	-0.427541497315275	-0.378867247178334
Mmp3	grey	grey	0.0412760018699377	0.093428744349718	0.0396877279584217	0.0122715124013808	-0.0682382757670924	-0.0674987352246561
Thbs1	M1	green	0.298097619323949	0.101431180475341	0.0406395080788357	-0.0308778319190007	-0.0771269584645867	0.0368019963944086
Meg3	M4	turquoise	0.0831395243672426	0.366569216459495	0.172863547606749	-0.125619962085078	-0.161297401855519	-0.356863777661051
Wif1	grey	grey	0.0890000631187764	0.197534110444307	0.180015047164746	-0.0843936364476584	-0.223888449027627	-0.16398834279848
Fbln1	M4	turquoise	0.00726211200852793	0.498894341375527	0.199033152457452	-0.0971773849846468	-0.0864229836024083	-0.459411681182698
Ackr3	M4	turquoise	0.103550048253737	0.33775396171086	0.0972954731773244	-0.140742121752347	-0.0708768755926919	-0.275483049087509
Sfrp4	M4	turquoise	-0.0365056037429359	0.140582591541017	0.0600777923363772	-0.0385132362719257	0.00597842702467129	-0.145376281535513
Apod	M4	turquoise	-0.0789642676874142	0.228420343098911	0.0686850571211788	-0.0308370344654074	-0.042630695212312	-0.236136838469157
Serpinf1	M4	turquoise	-0.0454271509207422	0.468426525492881	0.165748617390517	-0.089085905588169	-0.0373928243595836	-0.45798596087107
Ptn	M2	yellow	0.0107205515071043	0.0913608160904186	0.00392626977241441	-0.0618154134785651	-0.0782536004892936	-0.0899199413589158
Mfap5	M4	turquoise	0.0716922718836136	0.405291900696426	0.168521616697516	0.0344628640435727	-0.411050573673858	-0.381704687561393
Mbd1	M1	green	0.189976748529295	0.0713963553913829	-0.0299520807666599	-0.0200882701882094	0.00594902252383489	0.047776022334706
Smoc2	M4	turquoise	0.026346237772329	0.315573962003797	0.103760391189525	-0.0467648151326127	-0.0791259066917222	-0.294273847963021
Nbl1	grey	grey	0.0570050079694594	0.304966940732162	0.0396587883671802	-0.0733338810332934	-0.194434878626316	-0.126683357626728
Aebp1	M4	turquoise	-0.041335867487011	0.435216036917061	0.184120169066646	-0.0689868108810498	-0.0880950846642403	-0.41313281026715
Nrgn	M3	blue	-0.0106915813396524	0.0268421846809617	0.0379683563349403	-0.0983691127874035	-0.0435032294067965	0.0211255823438577
Ereg	grey	grey	0.12960780599651	0.145650749698836	0.0745625663743996	-0.0252991593710151	-0.0737390800896055	-0.114649567150144
Pf4	M3	blue	0.0120544645631013	0.0587666330032191	0.0549325295663028	-0.0679423385307122	-0.0628729295675549	-0.015998636397924
Ebf1	M4	turquoise	-0.00670250202987643	0.331177610667316	0.0474087987247424	-0.14145085481976	-0.0478209644589716	-0.314066481837632
Clu	M2	yellow	0.0734121807185194	0.181386558859049	0.0845932299435604	-0.13348929126374	-0.168660432275908	-0.126093349105485
Uap1	M4	turquoise	0.112175729246161	0.2973794199628	0.0527959807113269	-0.157642300548748	-0.0637822103700919	-0.235567896894765
Eln	grey	grey	-0.0247458835914234	0.293594640426689	0.213718551738277	-0.0341534200988784	-0.202148922952868	-0.274511242722493
Col14a1	M4	turquoise	-0.0353822398416249	0.450484683726084	0.245419983810933	-0.0813463623115855	-0.104474352623833	-0.446173219332158
Enpp2	M2	yellow	0.105655593602837	0.21541272867456	0.159279100960101	-0.12664196888306	-0.231039927632224	-0.19792703815689
Col1a2	M4	turquoise	-0.00677677164586975	0.395721740102317	0.173822331509939	-0.08719572165845	-0.295386704009152	-0.293359751536455
Fbln2	M4	turquoise	0.00942935559884409	0.446219885723211	0.131403253481422	-0.13458438172839	-0.0313107097336251	-0.391980343604376
Lpl	M2	yellow	0.0804312551538135	0.226855736026441	0.0438132947331138	-0.0771416844683131	-0.0649858503654591	-0.184124955478451
Thbs4	M2	yellow	-0.0470036325404518	0.0811778353443594	-0.00163273292360844	-0.0504458374239463	-0.0479431970988321	-0.0984349640304645
Crip1	M4	turquoise	0.094384862427225	0.528684305420004	0.30999749356428	-0.137381951261702	-0.429642378272667	-0.418719024277838
Myoc	M2	yellow	0.0469453607649135	0.103939987395025	-0.00805718478716252	-0.0399016450648443	-0.0114798111242728	-0.0873440677854301
Col1a1	M4	turquoise	0.0312909211354469	0.323674734161075	0.128639908975582	-0.0820106955624233	-0.296885001229496	-0.224323065287904
Egfl7	M3	blue	0.0791381961940436	0.117395616687585	0.153897234600738	-0.0717338120406435	-0.0557911855080009	0.0643793202508685
Tnc	grey	grey	0.0261621929134121	0.149843818389498	0.000685694292752852	-0.0258443981575258	-0.0605567476945368	-0.0746411409746657
Col8a1	M2	yellow	0.016828589271277	0.212364504587298	-0.00755170522947059	-0.108006948919935	-0.0345554597825545	-0.19012621743534
Sox9	grey	grey	0.110310938501891	0.216214703093524	0.103569417259612	-0.0731119342014045	-0.145106989596668	-0.184659302914621
Il6	grey	grey	0.132676217906651	0.146170971366264	0.0949863146299343	-0.022812309816906	-0.0839673500466797	-0.14002106893009
Sfrp1	M4	turquoise	0.00517379433003512	0.305307687193353	0.043994190476501	-0.0547360590136563	-0.0449713231671386	-0.266147041756507
Ccl19	grey	grey	0.0501549678175468	0.0986503363356304	0.0171183518504837	-0.0933188892219755	-0.123552478439851	-0.078630065575071
Igfbp4	M4	turquoise	-0.0415573108056128	0.506821357283751	0.231849079968482	-0.131516182779515	-0.122538993738396	-0.493786333895495
Angptl1	M2	yellow	-0.00995332000859076	0.212138561880846	0.000885093780434558	-0.0778549957100331	-0.046818411425707	-0.196068215972899
Ly6c1	grey	grey	-0.0284437850008155	0.262835886629715	0.097865027958139	-0.112657595617105	-0.0296037672622657	-0.159116890361402
Ifitm1	grey	grey	0.0748003586365476	0.184753141416236	0.0410629304590592	-0.0611294469531452	-0.116881718618386	-0.0968358169916693
Iigp1	M1	green	0.139120372263331	0.0919100922592026	0.0975793933020489	-0.0466016048700476	-0.105095139291403	-0.0225202624468285
Cd248	M4	turquoise	-0.0448421011084473	0.332674160202775	0.0896835923429054	-0.168546372061099	-0.000386851710310289	-0.293280925397853
Ctla2a	M3	blue	0.0413545286797984	0.106108502765813	0.159833147441485	-0.0968095066888486	-0.0477476456048286	0.108888077377381
F830016B08Rik	M5	brown	-0.00464200970114678	-0.0396361162923015	-0.0400707331553838	-0.040861765721299	0.0476716602111548	0.0233845785803639
Prss23	M4	turquoise	0.0354974558708901	0.218519159290732	0.106846249365763	-0.0560000973850159	-0.0608419901575057	-0.193963155090821
Cd74	M3	blue	0.0548283482880455	0.0990785460489337	0.111831176491592	-0.0466817748144497	-0.0462698138412367	0.0422522828416746
Penk	M4	turquoise	-0.0198751637650124	0.221605273970571	0.0441595648566073	-0.049767891688926	-0.0307537966059597	-0.216752868273859
Sox4	M5	brown	0.105425453151917	0.0646957948788907	-0.00954245106571188	-0.053764861424034	-0.0298172701370951	-0.0110656840939416
Hmcn2	M4	turquoise	0.00802570258253408	0.286360213531496	0.0621111038682395	-0.0544037952532751	-0.067823788623968	-0.26456878674013
Gm13889	M1	green	0.389500009028335	0.209885905888419	0.127325042087079	-0.0615202191345692	-0.226944896363573	-0.00437337309220803
Col15a1	M4	turquoise	0.0329707556774043	0.413198194487648	0.0857403973724122	-0.0743410407373778	-0.0752027983194702	-0.363737597436062
Ctsk	M4	turquoise	-0.0319746623709755	0.33068513436908	0.104351371172192	-0.0484622315904655	-0.052743276423806	-0.292958246710313
F3	M4	turquoise	-0.0253539206922811	0.21083963357197	0.102805253610718	-0.0202759175671064	-0.100761064404037	-0.196269986482953
Scara5	M4	turquoise	-0.0478078804302493	0.307767977118158	0.0908643314590107	-0.121375339505542	-0.00317138550043412	-0.284105206846529
Fabp4	M2	yellow	0.0472329329036749	0.0762125522567408	0.0113048771363728	-0.0253713345099748	-0.0972598423886315	-0.0562556136148191
Gja1	M2	yellow	0.184004876817737	0.324937919506159	0.157476254759652	-0.136012960041513	-0.201824639322087	-0.278143168412018
Htra3	M4	turquoise	-0.0232667671460009	0.381501511084769	0.0627731510054743	-0.117236399257554	-0.0494240731079395	-0.351005471069754
Tmem252	M3	blue	0.0695152242497798	0.114774987788096	0.111101157248992	-0.0165761085745299	-0.0586078095457909	0.0283957105114685
Akap12	M4	turquoise	-0.00799014505500996	0.266252921888584	0.127718019275727	-0.133034883898659	-0.00507094983859306	-0.197407523159809
Ccdc80	M4	turquoise	0.0833595958244728	0.460767050696576	0.170640212578886	-0.184158662487138	-0.1492534114023	-0.419881189913125
D10Wsu102e	grey	grey	0.160858064022976	0.190037524661665	0.0286421307182478	-0.0185405242850318	-0.0802442005643696	-0.0891337238380895
Acox3	M5	brown	0.0568314266231911	-0.0702549587595253	-0.0579925368493788	0.018509816496259	0.0817266366380173	0.134526317504765
Entpd1	grey	grey	0.0269691688636188	0.225110195822093	0.0599956984154953	-0.031522734717328	-0.0479688980877268	-0.16025012042325
Timp1	M4	turquoise	0.0207522773364148	0.149623397283046	0.0474826134099048	-0.0378381993792735	-0.0823067976197168	-0.118134327472448
Fndc1	M4	turquoise	-0.00923511668709833	0.320872944605338	0.0911136387010433	-0.11765253265591	-0.0646835226361335	-0.297250241637068
S100a6	grey	grey	0.0741191960477416	0.441269419290719	0.214750812142594	-0.134286809078864	-0.328424752175024	-0.296757307416055
Pecam1	M3	blue	0.108462628030891	0.13798626238123	0.127607240012386	-0.0276890567811657	-0.17071608541556	-0.084706113508609
Hspa1a	M5	brown	0.296725730042487	-0.00262023680936342	-0.0558522103142462	-0.0512260374317593	0.106105518761287	0.198288189052668
Tagln	M5	brown	0.0975446074041762	-0.159560023497641	-0.0784060219380384	-0.0541656409691204	0.0892617290745037	0.351340192651718
Tpm2	M4	turquoise	0.0593046300498775	0.209081582878345	0.143737328199873	-0.0843367146599625	-0.194482234783057	-0.176006484574652
Hopx	M3	blue	-0.0426901713484872	-0.0647698638304842	0.0367776110518445	-0.201381656249096	0.0938278975551524	0.255157091533758
Col12a1	grey	grey	0.144181703382581	0.260718898712945	0.126073108197787	-0.118455929937787	-0.168306088936447	-0.193378594564571
Gpihbp1	M3	blue	0.0958786222644394	0.122589998642375	0.140406042823505	-0.0562222122495165	-0.0412279779392962	0.0596348435454895
Cdh5	M3	blue	0.0717785762675933	0.105578859053049	0.143982270556916	-0.0332070429662831	-0.0383263479249867	0.0714992729689947
Ptprb	M3	blue	0.0723621607673292	0.0917923956990421	0.104650851914937	-0.0578559436882031	-0.016637411044302	0.0595556403241563
Scg3	M2	yellow	0.0311333950796034	0.125349857789579	-0.00988498029665559	-0.024036748449614	-0.0161027911671263	-0.109644996952996
Rian	M4	turquoise	0.0546163147460371	0.290562539139034	0.168657956296232	-0.0688353739251642	-0.0816652721886557	-0.264791244885568
Tgfbi	M4	turquoise	0.0790221212092668	0.445261440960864	0.316761969245781	-0.141967475244456	-0.218971936157772	-0.436829727867415
Clec3b	M4	turquoise	-0.0540832551751043	0.261517583973854	0.0380559322229204	-0.084011754719829	-0.00811161663563379	-0.146812003422062
Pla1a	M2	yellow	-0.0115271342941287	0.132352035848777	-0.00512649828211954	-0.0651195257281252	-0.0299130189763274	-0.119280865704615
Pou2f2	M3	blue	0.104371168851671	0.0971470846351539	0.0436518895003818	-0.0355158842487249	-0.0332906864412728	-0.0121033874342708
Cldn18	M3	blue	-0.00244178546581256	0.0021590375535471	0.0314260608462655	-0.174589228814862	0.0391592806183871	0.170367253331723
Rgs16	grey	grey	0.186866503550873	0.215616888486957	0.085583500918386	-0.113874026335931	-0.127296824942292	-0.147467389134726
Cyp2e1	grey	grey	0.100917321558853	0.206603956540684	0.267314186689532	-0.0846121062441152	-0.232488444277428	-0.16910715614182
Prr7	grey	grey	0.17048263495142	0.201340789261315	0.104578705916031	-0.0805784282193708	-0.145656209429107	-0.15279003277405
Hspa1b	M5	brown	0.120823952028166	0.00894334140795934	-0.0103245943440131	-0.0135593448249981	0.070586810642122	0.134509553164142
Lgals3	grey	grey	0.0027121621736753	0.235336201504124	0.0680470840844119	-0.115577638888424	-0.168843358740795	-0.172681398249392
Gdf15	M1	green	0.206249311980276	0.107973858845046	0.0355196223841842	0.0102046107408154	-0.0476195485481029	-0.0146646162546959
Gadd45g	grey	grey	0.323198808632414	0.354209625582556	0.190189056470738	-0.0552328350145686	-0.212865291934921	-0.19862889607949
Cxcl9	M2	yellow	0.0408853100238623	0.0540705032782194	-0.0019635191571454	-0.0391647859668245	-0.0608122021282494	-0.0555155280076384
Col6a5	M2	yellow	-0.00558721605605896	0.0567327978176971	-0.000835257277963474	-0.0379118032886307	0.0129196063302358	-0.0432156578118182
Gfpt2	M4	turquoise	0.117749011223379	0.370894305973094	0.111948197058029	-0.12984576749714	-0.0684593759908565	-0.328884128207221
Tnfsf9	grey	grey	0.140545349988614	0.227105380735335	0.0607316933058966	-0.0353598008820725	-0.122071107349787	-0.196847957878895
Dpt	M4	turquoise	0.105397484923427	0.447644642186683	0.200688619816469	-0.116461736816173	-0.302891555111674	-0.353260836790626
Htra1	M4	turquoise	-0.00485394789939635	0.414286738845093	0.123698893821973	-0.0762770100128498	-0.116730730572699	-0.374536294166528
Ackr4	M2	yellow	-0.0314483867688107	0.15918407983118	-0.00290157204974103	-0.0526206482055196	0.00389166453226848	-0.127226493017992
Neurl3	M3	blue	0.0897379236610664	0.0998955824523453	0.126506693392385	-0.0342805498804697	-0.0286389347145701	0.0125843397481141
Cd9	M4	turquoise	-0.018982036267738	0.568827540112324	0.278718670283062	-0.177376708623468	-0.230919681279112	-0.510022604705922
Hba-a1	M3	blue	0.021821516373397	-0.0115287575338859	-0.00119165525472097	-0.105028279588026	0.0130721264240454	0.0350598009873896
Ugdh	grey	grey	0.117144084397803	0.270265312771097	0.0609989691269425	-0.124201100392124	-0.00690942103098363	-0.191162871187637
Dnajb1	M1	green	0.358445134733487	0.206459666664694	0.0334222139673975	-0.0566122542752347	-0.0240917386053939	-0.00537596366349863
Tnfaip3	grey	grey	0.243660730356844	0.269970794056352	0.102358991169168	-0.0849847579386211	-0.106301651325765	-0.144979441102986
Masp1	grey	grey	0.0273359667280046	0.117682911520551	0.0134563756486137	-0.0285429969752342	-0.0227913898538913	-0.0882896835848057
Klf2	M1	green	0.330413022958648	0.274580611199303	0.0816003881343431	-0.0737049063534601	-0.0901926813858782	-0.104995395850182
Cyp2f2	grey	grey	-0.0022303674308275	0.103560223518651	0.000705505042895576	-0.00683110048408259	0.00372660833695086	-0.0760003077957553
Fstl1	M4	turquoise	0.0150791279234811	0.492212324505343	0.19989487142555	-0.17899554372187	-0.149199012508347	-0.421428922189898
Cxcl12	M4	turquoise	0.000968765372225875	0.302327329709635	0.164648125334733	-0.0856689069528545	-0.10963620944978	-0.2754844190591
Isg15	grey	grey	0.0206356689118514	0.13378740777985	0.0657173426276224	-0.0340204393196943	-0.0584637405176591	-0.114151613978968
Tbx20	grey	grey	0.0871642867585634	0.13157637074417	0.0184477573014403	-0.0821156776904816	-0.0402007824103008	-0.113038337589033
Srgn	grey	grey	0.0637611971302845	0.107033779173888	0.0774478877347814	-0.0786349412254129	-0.038732190743058	-0.00323083725218057
Ifi205	M2	yellow	0.0775176164848896	0.198656380569317	0.00556419592137204	-0.0724435644001033	-0.0251217006417758	-0.192438475821522
Ccn3	M4	turquoise	-0.0109264484826453	0.186119155218136	0.0027810021039238	-0.0440583441318725	-0.0122690057573599	-0.155244231945601
Cfh	M4	turquoise	-0.0629136690048906	0.208772001902456	0.0171611174744341	-0.0455507745314607	-0.111912601373291	-0.124990663328685
Pltp	M4	turquoise	-0.0259581537655643	0.301393974646682	0.197668247988382	-0.060955878442939	-0.0737531086818107	-0.215721241357452
Aldh1a2	M4	turquoise	-0.0606435017486374	0.151451716171371	0.0654799033385889	-0.0662109229112788	-0.0062066895125477	-0.147237781158578
Crlf1	M2	yellow	-0.0221080256465967	0.127087782214906	0.0403092700057405	-0.0740858218460651	-0.0420903062703952	-0.101742502681102
Ankrd1	M3	blue	0.0173392332455412	0.0571072682938329	0.0105218972013741	-0.0751007086759556	-0.0483930081149757	-0.0144825652115037
Hpgd	M3	blue	0.0522469326476828	0.118032750385503	0.183363455787172	-0.105268989434392	-0.112825196765098	0.0192964909205718
Id1	grey	grey	0.10912319148775	0.248707962755605	0.087241099085178	-0.0816008520766065	-0.128862062652293	-0.148802059828522
Metrnl	M4	turquoise	0.078440965551313	0.2708175361873	0.0395160851428375	-0.116957003226065	-0.0573234586318872	-0.222666532596694
Rasl11a	M1	green	0.182608873637431	-0.0100528664246875	-0.0568121214557662	0.0347420771241277	-0.0195733626581442	0.0991663590396816
Serpine1	M5	brown	0.344962706012714	0.102014658413358	0.0159844412824988	-0.0191524618929051	-0.0153775795490774	0.0736565039420099
Entpd2	M4	turquoise	-0.00850944144143781	0.428928899565272	0.130494232742579	-0.118857911959117	-0.0100322128578313	-0.406287465138249
Hk2	grey	grey	0.253059327170484	0.355989586179929	0.0721707276316593	-0.103038425605701	-0.116673178780786	-0.237592324412073
Hbb-bs	grey	grey	0.0350156379385008	-0.0161466639602744	-0.00359639463559091	-0.0836071197218647	0.030188452111677	0.0270139572433535
Hmox1	grey	grey	0.149428033887356	0.22915688101253	0.0395562217556048	-0.066848690373451	-0.0444684521990879	-0.149293169838936
Cpe	grey	grey	0.0201968380159867	0.108267224742871	0.0384274666972841	-0.0475944179088585	-0.105652669800237	-0.0957319069980586
Cox4i2	M3	blue	0.0252363836702508	0.0759725837803703	0.0765418326736149	-0.0831099468315937	-0.0270343050743206	0.00707988504216045
Hbegf	grey	grey	0.123474839348474	0.12652496413011	0.0257392756065874	-0.0536779059556804	-0.0970553725580174	-0.0357659148419955
Epas1	M3	blue	0.0338127909577776	0.0724595681552495	0.113267789250381	-0.132267963038092	0.00678078480673201	0.154463043079155
Col6a1	grey	grey	0.00348465514046667	0.339251213580489	0.0758173890778477	-0.15918904732175	-0.198235522370338	-0.213614218457374
Axl	M4	turquoise	0.0166462533379116	0.405667626277974	0.0657643608048458	-0.151562018006019	-0.0650487847014472	-0.357720786683496
Kcnj8	M4	turquoise	-0.037893206092028	0.224849083324688	0.145731833884125	-0.0600781633137251	-0.128335767632953	-0.22220930348999
Fst	M4	turquoise	0.0815290534476096	0.224374972676622	0.0623591283334759	-0.0707707001251522	-0.0246591217558169	-0.183050832173818
Dio2	M4	turquoise	-0.0223416940338665	0.141012597297187	0.119039535432521	-0.0446435980853354	-0.00725027660687534	-0.145460946713299
Plac8	grey	grey	0.05007870342973	0.165764287450078	0.0322469286440403	-0.0725036442199457	-0.0856366494454504	-0.124115801999464
Pthlh	M2	yellow	0.0439367138720794	0.100286988106828	0.0217322904030075	-0.00284015347001083	-0.0167212506163968	-0.10193787262844
Mustn1	grey	grey	0.0950975043286338	0.262687391392627	0.205843099175717	-0.14294262735151	-0.306186457996168	-0.227872460534818
Epyc	M2	yellow	-0.0184744439285124	0.0828622867764457	-0.00502572307330083	-0.0391045091543897	0.00103010552263649	-0.0792006077215986
Adgrf5	M3	blue	0.0119137067257998	0.0945757002913623	0.145653365501324	-0.0783553131951701	-0.0339423482629091	0.110790448308371
Cdkn1a	grey	grey	0.372055870137516	0.414506873598299	0.235579345187988	-0.102412910541777	-0.222124763678668	-0.222065121971068
1200007C13Rik	M5	brown	0.0798543866372955	-0.0924016990618123	-0.0592727376295867	-0.00045765364272825	0.0925343870951484	0.164482882194364
Csrp2	M4	turquoise	0.0277132050715982	0.368926741389842	0.174926862138434	-0.115966113514455	-0.131406816598253	-0.340702084083007
Basp1	M2	yellow	0.0191295327779363	0.106247042240304	0.0494705983852515	-0.0479132389072651	-0.0918097142405494	-0.115225822435653
Gas1	grey	grey	0.0907292340759463	0.360904637253983	0.0661114269098071	-0.124370190519047	-0.151462821592568	-0.287692490918064
Sema3c	M3	blue	0.0272538018752482	0.266496165458468	0.165822379970388	-0.167017623501565	-0.0972013887050447	-0.149646568513159
Gimap6	M3	blue	0.0683974033303102	0.112812467171703	0.0975671466767353	-0.0554740382538697	-0.0522415682770958	-0.0173654217028413
Plvap	M3	blue	0.0695269064252783	0.171882530543187	0.151334050534223	-0.0616374417357685	-0.0547112337708714	-0.0013029112005714
Vcan	M4	turquoise	0.0675512272530363	0.407034699404344	0.139489895450345	-0.130701513139084	-0.0905020038985225	-0.354525382259665
Noct	grey	grey	0.158041907399246	0.211836542062377	0.0967554097224992	-0.0643035672090468	-0.0747818415699768	-0.146215998742881
Vtn	M2	yellow	0.0468121000280496	0.0911333943043726	0.00130412609950795	-0.0492401502154415	-0.0716493829513865	-0.0580928267069509
Ly6e	grey	grey	0.0560081099584299	0.317296241075362	0.147928385612566	-0.103816264872247	-0.108416103976218	-0.180108987214033
Grrp1	M3	blue	0.0642040819368363	0.086829850232807	0.0789992415994658	-0.017908028132105	-0.0664509052753316	0.00772605683313899
Tnxb	M4	turquoise	0.00470732838544146	0.407109244724505	0.101851924190574	-0.150009284330118	-0.0764785484464746	-0.355307004719894
Rrad	M1	green	0.177861321660788	0.0961122063633983	0.102123251080832	-0.087484197162791	-0.089148435839666	-0.0066238278292717
Meox1	M2	yellow	0.0208632563025847	0.169690009259535	0.0383036951545338	-0.0983918018538159	-0.0253221540478352	-0.134264449933237
Bdnf	grey	grey	0.117096618798909	0.14541576356502	0.130886867303136	-0.0653875499443649	-0.121573725734926	-0.124876856816468
Lrrn4cl	M2	yellow	0.00252637591828639	0.206945448509358	0.0187484261365767	-0.0894323601789039	0.0117732277120935	-0.161970350117291
Cd36	M3	blue	0.0469590427382416	0.0738206132575669	0.0927694218897949	-0.0421405364929528	-0.0399927315026731	0.107823773902025
Ahnak2	M4	turquoise	-0.0511504365987672	0.36398765417858	0.166908370852763	-0.124548200227557	-0.0900922850067803	-0.34523937540679
Pdlim3	M2	yellow	0.11100765063894	0.217103835289673	0.187027271895063	-0.0768455015087376	-0.218182626144984	-0.212188887135894
Sema3d	M4	turquoise	-0.0457322232926487	0.229129115289537	0.133479711150549	-0.0857624213763447	-0.0904338870271327	-0.240383430878658
Cd93	M3	blue	0.0921188412179739	0.128075343253427	0.134581902707492	-0.0370853499222601	-0.109284062751782	0.0195772015291954
Myc	M4	turquoise	0.255050488248284	0.42507145623567	0.167864212057464	-0.143863332809696	-0.173159872958472	-0.353241137095484
Ppp1r3a	M1	green	0.066834265293709	-0.011081706330974	-0.0593706127110343	0.063398118302597	-0.0414077166503654	0.0569754266620569
Ltc4s	M2	yellow	0.0240236965099011	0.0875142163437225	0.0505684322993278	-0.0163469449403763	-0.0308497902132176	-0.0942691846275835
Myl9	grey	grey	0.0220945209974515	0.200150169500738	0.13682189899656	-0.0612457714055506	-0.218013053214319	-0.182721286872129
Krt7	M3	blue	-0.0514539585193796	0.0106169506086223	0.0550947314077568	-0.114561765164971	0.00841058435152216	0.100389571679941
Aqp5	M3	blue	-0.0339332862593473	0.0121980792480758	0.0706855227399613	-0.0956890370602573	-0.0284888364413167	0.0636685295159722
Timp3	grey	grey	0.176938775522915	0.301144175591191	0.13543246048097	-0.102290258247988	-0.249975901187879	-0.137315596432978
Mgp	grey	grey	0.123600566267355	0.278422819962743	0.101363392855274	-0.034138362502874	-0.268968922551744	-0.135575417100408
Lbp	M4	turquoise	-0.00458138287729439	0.233091580858652	0.0617622883417852	-0.0710180280749117	-0.0585404762893209	-0.199585682867924
Cytl1	M2	yellow	-0.000359121820656811	0.0494003374214788	-0.00420232640209456	-0.0359361634417352	-0.0535655728184542	-0.0468975561999092
Cxcl14	M5	brown	0.044954117927845	-0.0686943244175056	-0.121340792060899	0.00677247062200419	-0.0134740368978907	0.248300437834859
Nkain4	M4	turquoise	-0.0825374610881497	0.151403411912412	0.111815878912703	-0.0398081865663374	-0.0845541187086486	-0.164614901969725
Clic5	M3	blue	0.00534365951285422	0.0593200410138929	0.0835109657797415	-0.13809141145622	-0.0191453520929273	0.12770437557971
Aldh1a3	M4	turquoise	-0.0090347567634078	0.132101329754136	0.0722555639156965	-0.049538680618258	-0.000631229300032409	-0.127872823083729
Il33	M4	turquoise	0.0080516265644423	0.232308186991737	0.0823429323998882	-0.0643062632946581	-0.030439961998761	-0.224967608066573
Ecrg4	M2	yellow	0.00937921149154335	0.0697355733833545	0.0102977540138816	-0.044584051403935	-0.081159413583421	-0.0631973337462843
Creb5	M4	turquoise	0.178987969898498	0.379644853732041	0.172407629331697	-0.133270063745833	-0.159900594729372	-0.315344207042842
Bmp2	grey	grey	0.132866864656056	0.249774241837346	0.0540029466207891	-0.0964343229857507	-0.110165459843529	-0.146831632043998
Calcrl	M3	blue	0.0429288129099355	0.112108787767429	0.116580797193598	-0.0675580078647408	-0.0407429138802516	0.0511548232849088
Tm4sf1	grey	grey	0.0343058015084417	0.372483523340621	0.179907817481867	-0.144479197769403	-0.124714718182715	-0.290265119140275
Spon2	M4	turquoise	-0.0165738263379863	0.27583783802166	0.0859992545746728	-0.0673268510815463	-0.112380106442712	-0.261299941353801
Iyd	grey	grey	-0.0712134449963909	0.0925236184252412	0.0688333545360807	-0.0199512777665983	-0.0126722307434825	-0.101852678943819
Odc1	grey	grey	0.328356906956483	0.347431777574792	0.154745711849611	-0.162971066479869	-0.243854277235418	-0.184735484391023
Dpp4	M2	yellow	-0.00632137046158476	0.155120279203572	0.0513026188574746	-0.0906521993596846	0.000901624976327248	-0.112890777958424
Slco2a1	M3	blue	0.0319571488821995	0.100531281837975	0.122326216057339	-0.0629110967293158	-0.0404839794243026	0.0697248670213757
Col5a3	M2	yellow	0.0366383966837686	0.226183563455933	0.0710487916899076	-0.0532233490596757	-0.0922469634487087	-0.202517262730474
Cd55	M4	turquoise	-0.0271221429813423	0.321429510941558	0.083143540867713	-0.129056187589636	-0.0543537588160745	-0.273137976056593
Olfml2b	M4	turquoise	0.0342898907214597	0.370371533971504	0.199983176995016	-0.094518384185713	-0.125123869500148	-0.343132802221831
Spata7	grey	grey	0.0597073424257081	0.0568211018504617	-0.0430497791091202	-0.00460208953268833	-0.0241468571263804	-0.0201129924876197
Col6a2	grey	grey	-0.0425603939690759	0.31100944635471	0.0440608256334753	-0.0768273405444352	-0.187454887769868	-0.182690883781281
Fxyd3	M2	yellow	0.0065419961173531	0.0528837739007814	-0.000620694920152403	-0.0479826763761295	-0.0591678241955396	-0.038225632829388
G530011O06Rik	grey	grey	0.141655165839161	0.166536357169986	0.0298203492464947	-0.0196044179913603	-0.102136083587816	-0.11087040673807
Ptgs1	grey	grey	0.031671447976227	0.166831241127361	-0.0293013720765003	-0.0464162533566237	-0.0161678809285028	-0.087928594856892
Gem	grey	grey	0.395970259755774	0.493789538934774	0.174484172269677	-0.13285682569644	-0.254055157039716	-0.342965448579264
Thbs2	M2	yellow	0.0876316414024823	0.238833371036287	0.081613239778004	-0.115512971661474	-0.130677776058214	-0.223457826720599
Ccl8	M4	turquoise	0.0429461415293129	0.181418994249302	0.0232536666025589	-0.0094426113557301	-0.00723276304156987	-0.146168605977067
Ch25h	grey	grey	0.105111348226722	0.101183934507699	0.0628066755424951	-0.0313580847499409	-0.103750147820766	-0.107060683541431
Gdf10	M4	turquoise	-0.0062268497207504	0.22801827169788	0.122396487140733	-0.034433544479321	-0.0466909942150205	-0.235999628124926
Fxyd5	M4	turquoise	-0.000466081235356412	0.33661344956898	0.109102028020172	-0.125776123114276	-0.0864305434031518	-0.261053919496973
Ccn2	M5	brown	0.0628130775097285	0.00319850698577827	-0.0176725792851106	-0.0339396814922886	0.0619708425263136	0.114281438574062
Tppp3	M2	yellow	0.0206861032332388	0.279197635676147	0.0754626194044056	-0.145421465942659	0.00235844605517049	-0.153597805941726
Sgk1	M1	green	0.377608191111552	0.335094177257439	0.0724589578411609	-0.0523760563901089	-0.241948395819837	-0.123021733547323
Gpc3	M4	turquoise	-0.0204470398318155	0.0672213597684319	-0.0541051400657638	-0.0108469641153058	-0.0242340332599776	0.0849114602352852
Gfod2	M3	blue	0.0164694528871663	0.0211969598141274	0.0387478277860261	-0.0120144997234994	-0.0110604920829342	0.00194939373534466
Ramp2	M3	blue	0.0424910969435481	0.330552133450575	0.1707808940953	-0.132180256489172	-0.062984678737381	-0.141804816495333
Chodl	M2	yellow	-0.0246782039619713	0.0554644243910301	-0.00228833854630122	-0.0290279764560814	-0.0815788759080109	-0.0706581825529872
Rspo3	grey	grey	0.0556397106012134	0.125848641851864	0.0349890093157584	-0.079545085769257	-0.00759160571603409	-0.0705215218736616
Tpm1	grey	grey	0.0818019408057117	0.228122296174864	0.136983423407278	-0.0977550221216977	-0.228808291261403	-0.125526915658586
Dll1	M3	blue	0.0548525900669198	0.0637327409213938	0.0869817125940643	-0.0130080214758828	-0.053334937700723	-0.00848031171282056
Adh7	grey	grey	-0.0659937492816083	0.180179329174762	0.111717422995921	0.00886745900604262	-0.0800219132062638	-0.16804830270623
Gata2	M3	blue	0.0559901333303541	0.0911418638177578	0.115520286734503	-0.0203226755768803	-0.0327042277178162	0.0248669702254722
Igfbp3	M5	brown	0.0715073193926927	0.0666595970370897	0.104266233483437	-0.0414686369099684	-0.15854471060603	-0.0108518273866978
Apoe	grey	grey	0.0815652461501507	0.0135544983319001	0.00789933625060733	-0.101191550895817	-0.0491229559143586	0.204102912147066
Cd34	M4	turquoise	-0.0291485960626222	0.436625499713288	0.111523794086206	-0.143089099754084	-0.0467244739379618	-0.358760300100588
Colec11	M4	turquoise	0.00466473470178509	0.0959286816961439	0.0521284893583365	-0.0222065405055813	-0.0280038416214566	-0.0885200363059617
Gm29773	M1	green	0.0300851499414801	-0.010194791071262	-0.0357934005180126	0.0402397996634436	0.034944617807986	0.0164312664003886
Pde4b	M1	green	0.364161911677028	0.321973207547587	0.192254798406205	-0.123514464482097	-0.254745212077442	-0.202118123075261
Ifit1	grey	grey	0.0316897005068686	0.0669527869466571	0.0366191494189609	-0.0484456556499741	-0.0674813069543753	-0.0591437958869769
Ecscr	M3	blue	0.0102942612441795	0.13609192136683	0.139395620363996	-0.0549114500904519	-0.0754316804532087	-0.0133808212861267
Fbn1	M4	turquoise	-0.0285871673922607	0.323401555105951	0.0761173753384966	-0.1623607651706	-0.0624496572301666	-0.263070252285956
Cyp1b1	M4	turquoise	0.052778867527049	0.229297476790583	0.0707521902914578	-0.0626484499951724	-0.0182279157243368	-0.223533128422128
Gm8251	M1	green	0.123719852836604	0.0434409049286153	-0.0106926092645791	0.0311590433867032	-0.0199130604780135	-0.0118072526476501
Itgbl1	M4	turquoise	-0.0762207327943222	0.304107899813635	0.143507522345076	-0.0573640433410415	-0.081170862356336	-0.295184476297466
H2-K1	grey	grey	0.248977701987272	0.476327462075912	0.193341237028827	-0.132421771742185	-0.223480985969816	-0.239187409290922
Anxa3	M3	blue	-0.0142195682605539	0.212618051570344	0.0870702906464988	-0.123348003508891	-0.0333583398132341	-0.0789533933505058
Csf1	M4	turquoise	0.0753134089443227	0.327406005621329	0.0712900963122055	-0.125191747850208	-0.0753991176518658	-0.296514527157691
Sdc4	M1	green	0.319976359559381	0.393294057396675	0.190638724537892	-0.0874346568066556	-0.260510565516885	-0.205196953806175
Tchh	M1	green	0.125018578459501	0.0530115541674414	0.00418415803939052	-0.0257387522128063	-0.0247397887837835	0.025541414707615
Comp	M2	yellow	-0.00474388539393597	0.0763293915696411	-0.00613882469014374	-0.0526674957091711	-0.030561666868091	-0.0642601510511683
Serpine2	M5	brown	0.151022542530551	0.0128950774664706	0.0296739480997368	-0.0446924718856602	-0.12444874099223	0.162624640543428
Icam2	M3	blue	0.039269038001554	0.103898570652574	0.149557721290525	-0.0354250480985628	-0.0621305940179479	0.0510038834442439
Cxcl13	M2	yellow	0.0546662859177067	0.0789778454684506	-0.00546644112951198	-0.0727014445182574	-0.0054751669185725	-0.0562143946073317
Fbln7	M4	turquoise	-0.0472059383086357	0.134707680320562	0.0854209943450486	-0.0237439472867911	-0.0360336754526516	-0.157710865251791
Gm29863	grey	grey	0.0140658834085284	0.0855362774682221	-0.00646321295542276	-0.0226609803774402	-0.00163333157975412	-0.0525898392787038
Emilin2	M4	turquoise	0.00524470777046727	0.288873994431506	0.0487363738086535	-0.120527429813681	-0.00338421305663532	-0.247003110462284
Nts	grey	grey	0.0706194862109858	0.0748050926442005	0.0511041341148381	-0.014882811798377	-0.100062257382561	-0.0501881598573199
Cthrc1	M4	turquoise	-0.0179488598156148	0.087748133742254	0.0878779945758011	-0.0439649094761483	-0.000801744608428955	-0.0743656175124959
Col2a1	M2	yellow	0.00476681181783323	0.0561086391517514	0.00306125367070996	-0.0388062456464162	-0.0605997742049575	-0.0474200712895445
Adm	M5	brown	0.171149837363678	0.0200293483906436	-0.0634026318532758	-0.0339604093912791	0.0983741686948523	0.115895002856483
Scara3	M4	turquoise	-0.016016518534169	0.317649831290566	0.128433464625582	-0.112070437059978	-0.0613500028004962	-0.296219237997217
Higd1b	M3	blue	0.0440133965343782	0.071094602349149	0.0227436570717386	-0.0361330853717	-0.0631402591805874	-0.00792600038294071
Ier3	M1	green	0.619738087046261	0.421882338582714	0.148641937149624	-0.0777665958714855	-0.159992604853752	-0.132546127986293
Egr3	grey	grey	0.235704206187504	0.296350427060545	0.131491044200844	-0.0679092777550519	-0.208318045416844	-0.219808068843474
Col11a1	M2	yellow	-0.000481910539783542	0.0530456360033144	-0.00469126479975033	-0.0361257505804403	-0.0590078546556623	-0.0504540712418912
Klf4	grey	grey	0.387577044974759	0.428108441005125	0.158557835560484	-0.0597892605819362	-0.205976449291503	-0.22469754372474
Vwf	M3	blue	0.0227088345728904	0.070840759853489	0.0861766094289966	-0.0361311017507395	-0.0806194615850447	-0.00804207305360512
Pcsk6	M4	turquoise	0.063377723393678	0.272745365421382	0.0556594878392703	-0.104582903622995	-0.0480424338235263	-0.232860811002139
Lypd2	grey	grey	-0.0362838873043022	0.0463506879250528	0.0270257746219399	-0.0169645676004805	-0.0489435879393249	-0.0441797427783334
Kcnq1ot1	grey	grey	0.0771043530240946	0.191694674888058	0.0531616823043677	-0.0385402171226907	-0.076881696465253	-0.142312217701272
Ctsc	grey	grey	0.0883484622891569	0.0978674077358765	0.0502484926601612	-0.0141231295670486	-0.10975534520746	-0.0944395635074895
Tnfrsf12a	grey	grey	0.354236238986648	0.454205184867135	0.211182012783118	-0.143691496280225	-0.238979617677991	-0.282997005484013
Trib1	M1	green	0.45705965548863	0.413686122113781	0.185874715675902	-0.126069791635353	-0.239476849143206	-0.197086254827107
Map1b	M4	turquoise	0.0879545345626871	0.317953665659124	0.201163885724417	-0.134703305371869	-0.248697572125994	-0.317853510124374
Krt19	M3	blue	0.0159970455233903	0.0351447530015077	0.0687125853834049	-0.0855367241846182	-0.0319779262294157	0.0486858025899039
Mmp19	grey	grey	0.102579219616838	0.112755192034773	-0.0609187327957236	-0.0256878875972997	-0.0236287377346692	-0.000720321139055084
Ppbp	M3	blue	0.00268718091614596	0.0304379361569192	0.0397234685771773	-0.03220425126572	-0.0391229349921135	0.0069132673025839
Mia	M2	yellow	0.000530070498931761	0.0505424529307269	-0.0043517364482036	-0.0392735698172681	-0.0559435273418923	-0.0461872896286475
Cpxm1	M4	turquoise	0.0225274241747072	0.333729620975963	0.143779162460413	0.0232467776347188	-0.162893228038318	-0.299450769902584
Tcim	M5	brown	0.134826358255465	-0.0981448449723722	-0.10177957995956	-0.00204056226908764	0.111404551695198	0.276040860614555
Snorc	M2	yellow	0.00142757273286291	0.05121174173193	-0.00449014575703429	-0.0379042143771822	-0.056627810613846	-0.0478152918218315
Slfn5	M3	blue	0.0742484443944496	0.171362422973849	0.0986398615507837	-0.0893187532872354	-0.0504849283042395	-0.0704483822305772
Bcam	M3	blue	0.00283745121617258	0.0885685971531193	0.0810143619414339	-0.0560092926329462	-0.0971588456882319	-0.0242975242463789
Ntrk2	M4	turquoise	-0.00586955262480766	0.251336333558766	0.0479890459856643	-0.0559972319349938	-0.02794726248428	-0.228629917700205
Vit	M4	turquoise	-0.00827612683171427	0.175915717452742	0.0441199900546748	-0.101098975735576	-0.0158933376771555	-0.179639680712889
Mpzl2	grey	grey	0.0136411925501095	0.0740381877584998	0.00934706361578934	-0.0317824409133613	-0.0343096398362691	-0.0488804311983323
Osr1	M4	turquoise	-0.0749936057009349	0.256346265167846	0.153790004089319	-0.0462303952720975	-0.122380258941133	-0.285132933374124
Yod1	grey	grey	0.0968113829909207	0.106413666612772	0.0583226115206272	0.000506380219099991	-0.0326939458706205	-0.0649390018525263
Tinagl1	M3	blue	0.0651248999704179	0.0828126515333631	0.0631832468681171	-0.0420079203917251	-0.0702460491093336	0.0557865275402659
Phlda1	grey	grey	0.198349589257151	0.298701849917618	0.0642073690918337	-0.0591010627071482	-0.0767859973994363	-0.152504427881403
Tspan8	grey	grey	-0.0410345077060455	0.126910425978197	0.139896900938799	-0.036518349296642	-0.0956373981915999	-0.0636713155050789
S100a10	M4	turquoise	0.171741960010997	0.393807663177634	0.180596150608798	-0.135489449051581	-0.197265873650755	-0.202658456346232
Chad	M2	yellow	0.0225810867506359	0.0604492292876619	-0.00457346541806261	-0.0504479358210922	-0.0756536838900088	-0.0462512067706614
Acan	M2	yellow	0.0179717115789931	0.0618128060505528	-0.00485462211950564	-0.0501879990646986	-0.0752017572822782	-0.0497904213298426
Pakap.1	M3	blue	0.222240564796362	0.251325345391346	0.07357036017103	-0.185932136955534	-0.14905454484045	-0.0954159692482205
Plat	grey	grey	0.117471284813364	0.387842338527339	0.152420244243409	-0.121978406441833	-0.214866346894325	-0.271610007703205
Rasd1	M1	green	0.126843960647178	-0.016071201741497	-0.0582307387887611	-0.0189989447532442	0.0311032141446962	0.0993347429090823
Col9a2	M2	yellow	0.0136265766017397	0.0609178243159966	-0.00492637528638364	-0.0483457541048097	-0.0723903844947171	-0.051061325854612
Lif	grey	grey	0.0880087213115609	0.130358433784933	0.0190789050408995	-0.0548583400788915	-0.0469855519241817	-0.104324208615942
Gpnmb	grey	grey	0.00126296963661396	0.145630206956716	0.0592983010006311	-0.0825518964009486	-0.0838636252188286	-0.138707169078672
Medag	M4	turquoise	0.0863205435503631	0.398018158809192	0.131943253756691	-0.138906098243814	-0.134415882559586	-0.338910040897719
Esam	M3	blue	0.0695438237565674	0.13004379338145	0.120224877722462	-0.0395416898716262	-0.103250097922639	0.0244896501659197
Atf3	M1	green	0.603759128703249	0.408434198808135	0.122865592936425	-0.0892329290325748	-0.148739044314969	-0.138421817839374
Maff	grey	grey	0.435618887510455	0.437115743105972	0.191210419670012	-0.125817585430863	-0.241370952987979	-0.23513579640113
Pgf	M4	turquoise	0.0741907586824896	0.261720967914473	0.14707214902723	-0.136616844057319	-0.151905205859791	-0.223828488544786
Marcksl1	grey	grey	0.175208119918148	0.21665203113713	0.0685550011918568	-0.103678971047241	-0.110596785683434	-0.136470672220047
Chil1	grey	grey	0.0178286675007381	0.0484682809040446	0.0409314605291985	-0.0381639809604524	-0.0175754817324003	-0.0177721134418008
Fxyd6	M4	turquoise	0.0536803600502211	0.366426497608648	0.135359307151294	-0.0767673869093888	-0.270344320340779	-0.328571030692027
Nr4a2	grey	grey	0.158111880103393	0.184677233664484	0.0648668979950401	-0.0821490690013409	-0.15715482167633	-0.135332141271044
Apcdd1	grey	grey	0.033504390936408	0.145809503631483	0.0367649601901573	-0.0472343803539356	-0.0232610745400387	-0.0740718256864772
Dnm3os	grey	grey	0.117071049873998	0.152530502534691	-0.0179480410122226	-0.0503163584482954	-0.022434599506974	-0.122996505971729
Thsd4	M2	yellow	0.0131392282101872	0.12453321379938	0.0035094270109957	-0.0497195981397493	-0.0445861830671904	-0.103965179631653
Angptl7	grey	grey	0.0279906646215386	0.0844143351110167	0.0304301134134468	0.0125131805741448	-0.0494776721151737	-0.0696643589247583
Islr2	M2	yellow	-0.0214457899157127	0.109286381043733	0.00325537796079264	-0.0882410759001382	0.00883615365266121	-0.0862417928921464
Rnd3	grey	grey	0.259320886704744	0.349032338992266	0.0940014573147298	-0.115464229256218	-0.107719781109449	-0.219750157963243
Pappa2	M4	turquoise	-0.019566718248548	0.124609332489405	0.131350531572778	-0.024960543155322	-0.0778219762725247	-0.113364830220862
Rad51ap2	M5	brown	0.037412073760328	-0.02969903066168	0.0183852760093939	0.0386829350286348	0.0587639333553374	0.0695653674369504
Rprml	M3	blue	-0.00915431638322621	0.0287941981220151	0.0685795962039655	-0.0312372623358275	-0.00996790521198402	0.0767907125109796
S100b	M2	yellow	0.0427867235891108	0.0939588415738879	0.116553470462921	-0.0546262473324149	-0.144726272657292	-0.109310155542414
Fn1	M5	brown	-0.100893908405457	-0.149417999865263	-0.179067710809022	-0.0431691011753396	0.296552302481162	0.284518908442492
Lmod2	M5	brown	0.0104640739980278	-0.00112436774909509	-0.0405585998916305	-0.00738485257827501	-0.00640747095334576	-0.00107161947806758
Mpv17l	grey	grey	0.0518001833891997	0.0201875296023465	0.00443042836253459	0.0137688884639526	-0.0203913698148837	0.0259939580258116
Tgfb2	grey	grey	0.163401902534324	0.32411170110525	0.110134875888954	-0.122404150553703	-0.134831256511944	-0.248341873988894
Fam181b	grey	grey	0.0695688045512449	0.112281130540845	0.0434860131322067	-0.0258114958220748	-0.0465479108815417	-0.0779837347686593
Pim1	M1	green	0.535214296022652	0.308712214211236	0.106582532976776	-0.0844947386497861	-0.140478789075167	-0.0528512522754174
Ildr2	M4	turquoise	0.0144798371591835	0.199315550542107	0.107722645116275	-0.0962821465785445	-0.0650147306380555	-0.188017085333251
Col6a6	M2	yellow	-0.00622080147691452	0.161272632485033	0.00263998372966978	-0.0886771679211379	-0.0383763872025687	-0.164637541849952
Dclk1	M4	turquoise	0.0490037592697336	0.258477837550219	0.0732598141817592	-0.0890633757529275	-0.0817549933328474	-0.237112050566161
P2ry14	M4	turquoise	0.0996671384400504	0.224070733487683	0.238383030852959	-0.0945533552610816	-0.315249387632581	-0.240580125982602
Gsc	M2	yellow	0.0618631221473391	0.081409532374039	-0.00361449460321759	0.00204391670056489	-0.00837587645689065	-0.097009975714013
Bhlhe40	grey	grey	0.320133327969935	0.400815489113492	0.100524590462041	-0.152418387510621	-0.119178776727107	-0.238631087300257
Tiparp	grey	grey	0.295573921094881	0.304713205509248	0.0722669007920789	-0.116570405173924	-0.150736398917593	-0.175242068496695
Tpi1	M5	brown	-0.0358649551599946	0.0146763917830799	0.0299243947868735	-0.0215506515031386	0.00266724864343582	0.0651424419469277
Twist2	M4	turquoise	0.0128537643288369	0.244831104368168	0.0529273230771042	-0.0740283914688571	-0.0106342289497544	-0.213861100670881
Enho	M3	blue	-0.0099741306458458	0.0889352971586267	0.0422598749752977	-0.0353796216854415	-0.0733157884761273	-0.054994638025155
BC028528	M3	blue	0.0765415683112932	0.132076660297855	0.114619904349237	-0.0614633181712644	-0.0727400961506082	0.0473095257612287
Htra4	M4	turquoise	0.0147039638731863	0.151232713187666	0.0617326936452844	-0.0222416434585717	-0.0123050636392103	-0.12252125669972
Ifi211	M2	yellow	0.0661577431168214	0.196744867771954	0.0234342203633621	-0.073951392269494	-0.0149275982312162	-0.178304051543449
Adamts5	M4	turquoise	0.0304373082114641	0.240440208937936	0.0544116467125364	-0.0961153582739579	-0.0348803594188199	-0.200924175901027
Gm26917	M5	brown	-0.124699829138944	-0.0946195577861116	-0.0441579438203701	-0.0574749491263673	0.0667160736029497	0.0909799024244832
Cfb	M4	turquoise	-0.00504087696767195	0.233768292020796	0.109417341002743	-0.00858749073548101	-0.0274864371603331	-0.210261768777738
Tent5a	grey	grey	0.125770336669172	0.302696808198503	0.111746187495073	-0.0773242742606134	-0.103183310403382	-0.223114373124477
Tmx4	M5	brown	0.110347307538146	0.0477503787264336	-0.0257132904292408	1.37549713236543e-05	-0.00342939234116547	0.0706372772180412
Rnf19b	grey	grey	0.208437126192029	0.244126379508944	0.0825920548635194	-0.111322229283847	-0.122564233816741	-0.163405580957284
Ccrl2	M1	green	0.339881434315819	0.222628055032417	0.107921677125658	-0.059533371086941	-0.140538955563394	-0.0692996433680573
Clec1a	M3	blue	0.0473517535326398	0.103204697368101	0.123976411589561	-0.0493603633542332	-0.043856234590396	0.0383124712815497
Twist1	M2	yellow	0.0348960847324729	0.269308791372909	0.0720039915174589	-0.0777848419087371	-0.0661149984480428	-0.23797291431656
Adamts4	grey	grey	0.142710175389237	0.163846655237278	0.00567677961002043	-0.0714641562399481	-0.075292254489713	-0.135514625740179
Tpbg	M4	turquoise	0.0076632210513855	0.184954281209164	0.0415038385940765	-0.0227205232259329	-0.027954118698826	-0.161265852068076
Rspo1	grey	grey	0.0311843890258205	0.199846447317211	0.0105103190006804	-0.051533814269916	-0.00792329727519351	-0.140755754228857
Gja4	M3	blue	0.0678151022827725	0.116356834630397	0.11279482838122	-0.0369462782065815	-0.0880198604321543	-0.0237180965989584
Apoc1	M5	brown	0.0313604361424318	-0.0653461010965361	-0.0273899329976172	-0.01495450377164	0.0567108888351528	0.164572742929796
Klf6	M1	green	0.322106104575011	0.191454433888339	0.0089413615956155	-0.106564534690954	-0.0369368805190779	0.0200572904275528
Ace	M3	blue	0.068396236924006	0.277082402088866	0.198234431644271	-0.111657601637491	-0.133419248687101	-0.167580831398134
Sec14l3	M3	blue	-0.00888813018907556	-0.0249190399312541	0.038849646348789	-0.198680569808361	0.0339267971023683	0.16155510089967
Slc7a14	M1	green	0.0684946237929617	0.0334199511809603	0.00596309147564221	0.0354217330942948	-0.0495200741511661	-0.0105249495258733
Ehd4	M3	blue	0.151357570263354	0.247527587149646	0.242842586940701	-0.140773321775969	-0.202664824007336	-0.0818215988819985
Foxd1	grey	grey	-0.0951809281578531	0.142779754828372	0.0423642060513756	-0.051840197997936	-0.0414221328054249	-0.137378085846185
Enc1	grey	grey	0.1545625273278	0.253913830132047	0.0641188847758202	-0.0895068942659457	-0.0668877566418544	-0.193069331004565
Sparcl1	grey	grey	0.130209698484744	0.406151575482545	0.23591918226831	-0.0626054992847218	-0.363482784150504	-0.306839467723453
Ttn	grey	grey	0.0340521908998997	0.016603627659584	-0.028635770765629	-0.0651171071340542	-0.036828696651624	0.0287362181250157
Tnfaip2	M1	green	0.226418201628252	0.144329746711095	-0.0628850808381011	-0.0413508144110631	-0.0114871839793411	-0.0109465809434253
Slc38a1	grey	grey	-0.0152432284413696	0.0663941986249216	0.0243325484873074	-0.00366787637026764	-0.122308013442939	-0.085364803898015
Cpz	M4	turquoise	0.0118653010836487	0.162547596557184	0.106337223330426	-0.0188597959167898	-0.0147993562815338	-0.138399825706266
Pam	M4	turquoise	0.0292418436367261	0.424421264210138	0.219481683087188	-0.153380987551751	-0.263480054315877	-0.360265431546657
Adamts2	M4	turquoise	0.0506103573227495	0.39754293324402	0.197090905191784	-0.0694937393450545	-0.149535463971687	-0.342686747345212
Sgcg	grey	grey	0.18542918788454	0.224657492098417	0.276010708129859	-0.11751110173487	-0.3289377618816	-0.203418181395384
Krt8	M3	blue	-0.00751055210243758	0.0165038185615689	0.0168612981154576	-0.070938499754762	-0.00678480460764412	0.0401852893565966
Neat1	M5	brown	0.194990352708697	0.027063932228098	-0.118529903448969	-0.0605603749632576	0.203005320269432	0.15356502803518
Lgi2	M4	turquoise	-0.0350847969611453	0.166038627607686	0.0878200266920655	-0.0393489828091092	-0.0385720522110245	-0.174008519621994
Cadm3	M4	turquoise	-0.0531046617770828	0.188952131132559	0.0226191923762667	-0.0799384293511765	0.00704210171241427	-0.173048066546666
Vim	grey	grey	0.227256136272741	0.666693090811008	0.298204852900358	-0.205378821058469	-0.387326407163403	-0.388494347854353
Ncmap	M2	yellow	0.0136265766017397	0.0609178243159966	-0.00492637528638364	-0.0483457541048097	-0.0723903844947171	-0.051061325854612
Cdh15	M2	yellow	-0.0062928404210081	0.0393565405493225	-0.00322311867409476	-0.042473100579443	-0.080326113948459	-0.0521695080183329
Prss35	M2	yellow	-0.0495869761085883	0.0519543243331223	0.0173150208481071	-0.0332372228880516	-0.0356971150208811	-0.0517591875592541
Syt15	M3	blue	-0.00192168324715805	0.0250246069627261	0.0315291747393237	-0.0268784255716346	-0.000426687747289456	-0.0108267064828635
Igf1	M4	turquoise	-0.0204555783632576	0.328072288084893	0.142795477045587	-0.067863202749809	-0.152852540484242	-0.315151357512881
Hs3st1	grey	grey	0.0199716161874206	0.168820019993563	0.0853035299128578	-0.109259704971888	-0.032516272869715	-0.095768635288251
Ly6k	grey	grey	0.0558504280905616	0.158106665103617	0.0331883248672739	-0.00514328064013728	-0.0534626355907684	-0.137894091447903
Hspb1	M5	brown	0.379940703846206	-0.119153656120867	-0.192017268178914	-0.0643404595933011	0.20085189438058	0.424060578565114
Matn2	M4	turquoise	-0.0241158957412895	0.32699736675481	0.0918891758713479	-0.103596099708671	-0.0458626484578958	-0.305397691473077
Wnt6	grey	grey	-0.0188729253926453	0.0584338373367704	0.0324370900191471	-0.0364580808456679	-0.0924382347522616	-0.0683008416570879
Gm4951	grey	grey	0.02728693429358	0.0948490216337193	0.0309066943384682	-0.0738712682114342	-0.064034578644033	-0.0650230920996124
Gm20621	M1	green	0.0607147972704631	-0.0119827251391185	-0.0189907057006279	0.0303867240761842	0.0111363029046284	0.0588987613932932
Ifi204	M2	yellow	0.0518682168945169	0.207312754905459	0.0546440170941611	-0.0851975648834906	-0.0187981536505234	-0.161648790095373
Gm42418	M3	blue	0.0177116367509575	0.283834277139159	0.104356719222619	-0.326034217067298	-0.0878831926205307	-0.00263920603889955
Sod2	grey	grey	0.284013684464069	0.236208059823868	0.118885738473418	-0.110572772058599	-0.127383490237341	-0.0876618784114635
Adra2a	M2	yellow	0.0290510228935227	0.0606779482417619	0.0227160773978385	-0.043163768692642	-0.069536479662174	-0.0470518428336237
Anxa1	grey	grey	0.0709709114788985	0.355279065962369	0.105854351862559	-0.10109995568737	-0.112731437753343	-0.159478342179452
Nfatc2	grey	grey	0.190982713393784	0.250305516708467	0.111941646321759	-0.126871888696568	-0.154052298540568	-0.151491078573022
Ramp1	M2	yellow	-0.044210545126437	0.106825488128231	0.0137489486443335	-0.0441470632163815	-0.0102030343257749	-0.105862588458381
Pax7	M2	yellow	-0.0166009049944521	0.0625311335384119	0.022024813816727	-0.0115026203098766	-0.0968123882429772	-0.0696324924809339
Igfbp7	M4	turquoise	0.0732785872707344	0.563986953019817	0.247034646972146	-0.123661304158257	-0.440848202829698	-0.407177752415856
Lyve1	M3	blue	0.0759050824092299	0.107901875816693	0.108447393543858	-0.0351613996472775	-0.0982993725999426	-0.018938668339181
Ppp1r14b	grey	grey	-0.00123092120311342	0.333204322713353	0.0689790568017386	-0.158638600139479	-0.0812487183790749	-0.236633092800307
Lsamp	M4	turquoise	-0.0402317814097387	0.327461275153138	0.118663694248583	-0.0953347345964845	-0.0226776165923516	-0.316373160720987
H2-Q4	grey	grey	0.311871849727824	0.420448045983226	0.219290640228034	-0.146946854066674	-0.234730598080091	-0.26982895447324
Serpina1b	M2	yellow	0.00819653201402669	0.0707568894666255	0.0214414123998942	-0.0620078953050059	-0.0505522175151912	-0.0553808839844988
Lrg1	M3	blue	0.0471870869815796	0.0731124054257225	0.0761753453524324	-0.0213424027827579	-0.00792034120421651	0.0281766274337656
Lamc3	grey	grey	-0.0695094812322531	0.0759384850007408	0.0351363109421684	0.00244772451477758	-0.0820805900132179	-0.0669851062904711
Ahsg	grey	grey	0.049588010029613	0.0801838031514353	0.00178632515779421	-0.0422101552058329	-0.0149814230775422	-0.0483536099934868
Col5a2	grey	grey	0.0416244168073027	0.365783005143266	0.0619853682875844	-0.105448216163274	-0.115955471279511	-0.28980320864359
Crabp1	M5	brown	-0.026004392898892	-0.0109995641549891	-0.0640335348906096	-0.0165794551492619	0.072062492127783	0.0578385654030632
Angpt4	M4	turquoise	0.0184599386172918	0.0688532904553802	0.036962760177317	0.0437104607340889	-0.0127012784864566	-0.0830366379155626
Evi2a	grey	grey	0.0016020370789256	0.0211724171652587	0.0267867182759408	-0.0607922894357282	-0.00880535937765483	0.0269472348434338
Nrn1	M1	green	0.0628851485386542	0.0112681478963237	-0.0232334352269743	-0.0164603636127726	-0.00256192663154507	0.0399934900122158
Clec11a	M4	turquoise	-0.0220329149977501	0.283526986817053	0.156185543154505	-0.0162099276059016	-0.101850170152281	-0.228279862050922
Grem2	M5	brown	0.0914702142092867	0.12098814251444	0.239453328355991	-0.10229629389826	-0.27442562648989	-0.114942073168211
Timp2	M4	turquoise	0.133112790905962	0.358013881016353	0.130088263385669	-0.137498886197123	-0.193266615286444	-0.0811618767808417
Akap5	M3	blue	-0.00723959135685026	-0.022637383579171	0.0195863486372674	-0.184212562070047	0.0258416393687787	0.157948975629601
C2cd4b	grey	grey	0.0114545959746473	0.040550962987854	-0.00968460008058787	0.0114305298106678	-0.059667942437794	-0.0386033596615646
Lypd1	M4	turquoise	-0.0642414645187947	0.0788367575434458	0.0465719354398416	-0.0466881422227358	0.00337647110867836	-0.0894069455413815
Plxdc1	grey	grey	-0.00905998749084141	0.113239972621023	0.0366442900314077	-0.058825244497876	-0.028671398200161	-0.0820105504219062
Srpk1	grey	grey	0.0532757036524273	0.0868166734345356	0.0422715842864226	-0.0322643271295631	-0.0194506787223939	-0.0436622322059331
Slpi	M3	blue	0.0371241320905529	0.0450337089667428	0.0231966227558347	-0.038284847978454	-0.059310581061309	-0.0101797115563719
Scrg1	grey	grey	-0.00773162837583941	-0.0138811426974719	-0.025951993521419	-0.00545092689404981	0.0060111405072191	0.0440046123558963
Tspan11	M4	turquoise	-0.103342222795323	0.293570585344164	0.219315784846674	-0.0109592108827051	-0.060574754489646	-0.309558431870391
Hspb8	grey	grey	0.123723483485838	0.319438522330517	0.126916512424401	-0.126756616938298	-0.0910617425016003	-0.227833208343073
E330013P04Rik	grey	grey	0.027517342858025	0.114482803010575	-0.0139363959212153	-0.0337972134031178	-0.0110448839163612	-0.0729639526651542
Ugp2	grey	grey	0.0553757216643743	0.298830903519648	0.0753937737547419	-0.134061285752494	-0.0304337273259701	-0.198084893798058
Enpp3	M4	turquoise	0.0224994851391092	0.283497276518266	0.214280165634997	-0.0828390084400266	-0.0990982754572294	-0.271546160566891
Cyyr1	M3	blue	0.0295529439186294	0.0791888161748833	0.0977517353517773	-0.0463368284131351	-0.0520120867385807	0.0383958775756549
Edn1	M3	blue	0.066168743999561	0.103109257186405	0.112523581538247	-0.0349516822501705	-0.0348517836843495	-7.61670507912895e-05
Esm1	grey	grey	-0.00984204702260447	0.0887754233763896	0.136575099785054	-0.0234210520009488	0.00337367531838817	-0.0453080885533861
Mmp23	M4	turquoise	-0.0161910377031514	0.349609263325376	0.175949058476054	-0.118727044286988	-0.0813971735423188	-0.354095024671252
Tspan13	M3	blue	0.0352719080535371	0.0944550073161126	0.128610706431816	-0.0776091495564651	-0.0358294636105088	0.0549414407447436
Aldh3a1	M4	turquoise	-0.00187030130636909	0.151419548218198	0.0431301447391116	-0.0206990675325614	-0.0318262983406233	-0.134027978290214
Gdnf	grey	grey	0.0873829511647054	0.110149121551428	0.0939416282394953	-0.0701068401052394	-0.109185868306109	-0.0879229051221492
Emb	grey	grey	0.0277389153379588	0.0787885751528142	0.0493495049310208	-0.0714293064450946	-0.0585492171607541	-0.00567055958289604
Foxg1	M2	yellow	0.0225429470890282	0.148213876802858	-0.0110549818410768	-0.0685491404042969	-0.00361195473359044	-0.114398241333171
Ddit4	grey	grey	0.0503283306331811	0.0669762011230187	0.0634646999003295	-0.00670122365697978	-0.0402889763140309	-0.0475134316271727
Stx11	grey	grey	0.158704344446151	0.21449373996431	0.0633840467587175	-0.118299741803792	-0.0934865541000042	-0.146971924127978
Tspan15	grey	grey	-0.0318117163830242	0.0621776705961189	0.0104584601919125	-0.0632161983678073	-0.0466344077060993	-0.0177089369765624
Plek	grey	grey	0.0163443578706828	0.0671972329441729	0.0385156722925116	-0.0715026145357803	-0.0124285456892601	0.00216937150781154
Gfra1	M2	yellow	-0.00760031706118831	0.0996287939108799	-0.00821087261240258	-0.0328488717524084	-0.0281663237488978	-0.09470901685577
Fbxl18	M1	green	0.0845862399686939	0.0485379406022038	0.0067126354438396	-0.0432138535670553	-0.0191209562638704	0.0184320711085843
Tubb1	M3	blue	-0.0171317217557588	-0.0204898558991592	0.0164156418950518	-0.00947562111201542	-0.00227597984724173	0.0354016861663727
Susd5	M2	yellow	0.01860594523771	0.0617899676241645	-0.00483054370226399	-0.0503444760020223	-0.0754442160503826	-0.0494595338619953
Hapln1	M2	yellow	0.00811705898362355	0.0576756416722305	-0.00483054370226399	-0.0444661157398129	-0.0665201677398435	-0.0506765506616465
Pcdh17	M3	blue	0.175682462889405	0.170489712785967	0.173573878631875	-0.111076876080941	-0.184269210080412	-0.0232324410540256
Ces1d	M5	brown	-0.00189323739560805	-0.293547247033379	-0.254294617162108	-0.0289578237547218	0.304075943549882	0.530674499778229
Actg2	M3	blue	0.0203634538979561	0.0867510556227259	0.111475003916949	-0.0588775544745573	-0.0947662674193946	-0.0795005210772746
Col9a3	M2	yellow	0.00334274343588149	0.0572406621350551	0.00565661424470538	-0.0256318646033521	-0.0520824472356746	-0.051646834197804
Dbn1	M4	turquoise	-0.0205816395485079	0.281703023200195	0.0824648877876495	-0.145989524809583	-0.0569844907282767	-0.253982642254754
Itm2a	M4	turquoise	0.00833731316539618	0.271183187552738	0.0672744919721322	-0.0705952449852699	-0.0800337882344365	-0.234553048727392
Myh11	grey	grey	0.111605440934781	0.135014968139882	0.132022191118208	-0.0607531535757687	-0.19351523031721	-0.116658348642365
Mest	M2	yellow	-0.021428788476365	0.107569837936938	0.0545729583696414	-0.0316146781104414	-0.066813333507775	-0.0979122005767578
Rai14	grey	grey	0.0150568649959045	0.10150078169603	0.0300001057315578	-0.0845275862829427	-0.0673538707597121	-0.0674008183292298
Krtap28-13	grey	grey	-0.0222857074089446	-0.049831699293601	-0.0410865058998226	0.0211786903589139	0.0505362986882599	0.0639834945926678
Herc1	M5	brown	0.0850985613710592	0.0790181006042411	-0.0480633358144237	-0.0457232219010742	-0.0586961427894488	-0.0212541138142877
Prrx1	M4	turquoise	0.00277828257556491	0.277690623690892	0.0809928684148495	-0.0999864620173036	-0.0796766280575415	-0.21865987834455
Wfdc1	grey	grey	-0.0423097372916326	0.271832273190136	0.15481420619113	-0.0137102975601679	-0.126976428844151	-0.246714219574561
Lipg	M5	brown	0.0741210335784804	-0.0604573417876156	-0.0466862325185459	-0.0318136801463159	0.0956980111275584	0.158068444322488
Slc7a2	grey	grey	0.0382227706685929	0.0495550976625532	0.0187898104138238	-0.00265897101740859	-0.0370270104332468	-0.0425150446433192
Cyp4b1	M3	blue	0.010852945302174	0.1148665065891	0.104542545809901	-0.0969778435290393	-0.0199169787295168	0.00197292519435801
Edn3	grey	grey	-0.0284820917321449	0.0868906406122289	0.0274344854861159	-0.0417983988244481	-0.111413575474858	-0.0926291037817711
Nav1	M4	turquoise	0.0108758634353076	0.394041267273402	0.153603530812282	-0.0894362461695269	-0.117905279639411	-0.355745581420373
Col4a4	grey	grey	-0.0686213635307731	0.122632469538528	0.105100160978772	-0.118239174515437	-0.0344828861836127	-0.0979820006219154
H2-Q6	grey	grey	0.0981336024633513	0.107210109809665	0.0586187939387889	-0.0298445781557663	-0.0275760109709004	-0.0675791341709936
Fmod	grey	grey	-0.00237607904136222	0.00777270177733828	0.00945233912497434	-0.0395089754681362	-0.014105603953492	0.00121355193706618
Myh14	M3	blue	-0.0278137845763861	0.00889346635811108	0.0532323901870395	-0.137135634949692	-0.00122325301953487	0.0816448964152709
Lmo2	M4	turquoise	0.0349394684259841	0.288621935950772	0.100247477916833	-0.128161186734372	-0.0289645445718896	-0.23916480709467
Rgs18	grey	grey	5.21706709056865e-05	0.0313864877644662	0.00780795075755117	-0.0735957007238172	-0.00423885024882748	-0.0144683120312828
Nefm	grey	grey	0.00136735062209224	-0.00705227739299077	-0.0115602728979954	0.0330646494895274	0.0185719179142028	0.0346643050377416
Barx1	M2	yellow	0.041609398080922	0.122656354628376	0.00299711906026405	-0.0438494700866529	-0.0104817134522681	-0.0995474785971821
Ptch1	grey	grey	-0.0355462140775213	0.0711769186652997	0.0448442622209438	0.0267239083399457	-0.0169139892973375	-0.0393321712042855
P4ha3	M2	yellow	0.0598553948599184	0.206480848516668	0.179631383605779	-0.110270378913332	-0.231683969810506	-0.211310571463747
Lmcd1	grey	grey	0.0251030657781901	0.0669470668882086	0.0238018725073733	-0.0176827231347433	-0.10548333195296	-0.0541287618976182
Ndufa4l2	grey	grey	0.0230177852912507	0.174016709263784	0.0723306714428338	-0.0855179851525616	-0.02639433748224	-0.100798935685358
Mlana	M4	turquoise	-0.0525517229472709	0.0553733550163888	0.0535069002656433	9.39410149930789e-05	-0.0169061295335642	-0.0878608838169885
Nes	M3	blue	0.150220347568997	0.175583810564696	0.155002661007386	-0.152785415177877	-0.129482997714455	-0.0313791145618932
Batf3	grey	grey	0.0309094045472111	0.0906611072373911	-0.0139910885858498	0.000883012967359927	-0.0206881258777212	-0.0772633643567118
AI593442	grey	grey	0.0103603914385961	0.0517306969927785	0.0193558764256353	-0.0291661433122023	-0.0840443483122381	-0.0231199848060684
Ccdc170	M2	yellow	0.0653732394876778	0.0965978019112556	0.00926642773929727	-0.0653250227276967	-0.0380670225490805	-0.0750251130572589
Cd83	grey	grey	0.0115659752915258	0.057573532566462	0.00772627121922868	-0.0363743310831208	-0.0457791865864819	-0.0801391469060154
Nop58	M1	green	0.338223765193699	0.264205236743787	0.0600793194834441	-0.083399692716924	-0.111980868450556	-0.068593506284639
Msc	grey	grey	0.0611537995689307	0.109942788662141	0.0149900885386245	-0.0548279199815615	-0.0704073745974401	-0.0838331267069766
Irf1	grey	grey	0.406365689027231	0.326217900626061	0.0999514267845136	-0.0890707165783696	-0.134270610236366	-0.132836625985246
Podxl	M3	blue	0.00456949075435319	0.0903474169804105	0.0965573152020044	-0.0308425277701741	-0.0416023299249755	0.0248795127671323
Pdgfrl	M4	turquoise	0.06927288584665	0.451927050454927	0.217650190574871	-0.0473591192502255	-0.216496036875852	-0.400534667299717
Krt18	M3	blue	-0.0244862986272905	0.025685998487086	0.0265177809072227	-0.0384376661514161	-0.0358818127422544	0.0123800473718238
Rgcc	M5	brown	0.116690087478388	-0.0184373714992869	-0.00957153741992152	-0.0761072391543507	0.033107967697935	0.192601872130722
Lrat	M5	brown	-0.0115808466837397	-0.0738631941942075	-0.0560964441921285	-0.00624883853798231	0.03381198430529	0.135773602715301
Csf2	grey	grey	0.0384967960192203	0.0526220843841189	-0.00440550296090098	-0.054418011210021	0.00198147406234522	-0.0410657792480156
Opcml	M4	turquoise	-0.00716383898538647	0.265647933169749	0.0378481117020987	-0.074183398782776	-0.0415777599319845	-0.246204784136057
Anxa2	M4	turquoise	0.107327287986591	0.42501199720681	0.156287373124268	-0.169504907552421	-0.200587228101804	-0.222198237475709
Rgs2	M5	brown	0.0818311077861504	-0.149746757750553	-0.0521053029344994	-0.0542777379857413	0.0527878520031552	0.30091445158321
A730036I17Rik	M3	blue	0.025946630646039	0.0143652003163599	-0.0159933731090369	-0.0407617618042979	-0.0504575591563035	0.026605618894168
Crispld1	grey	grey	-0.0236096067578058	0.147647796559594	0.0126790647712996	-0.0129182420232833	-0.064490352253785	-0.139917222871423
Lhfpl2	M4	turquoise	0.0871798280220706	0.159971126847018	0.118583478331675	-0.0588556655249077	-0.0896576185129783	-0.166140965700095
Gm34921	M5	brown	-0.0222034646754158	-0.0443400758460411	0.0114190810748746	0.046392869510522	0.0358565063271246	0.0457970784419314
Sema6a	grey	grey	0.0379471300742412	0.135840217034082	0.0867661483347279	-0.0191030585591397	-0.0992032209360771	-0.0672305992251011
Dusp2	M1	green	0.0502171528217226	0.0729458463263377	-0.0240897691914775	-0.00425823093845106	0.00692938457428349	-0.0375546193681514
Flt1	M3	blue	0.0714005665127874	0.10790161968007	0.0937973360318994	-0.065749161809627	-0.0311713323783321	0.0756652847045986
Sparc	grey	grey	0.0573123926141388	0.438075142794257	0.112575927843577	-0.21513709596284	-0.17815975740387	-0.147330842933419
Lgr5	grey	grey	0.0853837721974026	0.167777776012758	0.2242128734248	-0.0866164673147035	-0.232875633863556	-0.173651943417752
Fabp3	M5	brown	-0.0190259629894895	-0.128829296132575	-0.105801462889692	-0.0917274532201074	0.145251788993785	0.26377650982477
Pdpn	M4	turquoise	0.0341449803056649	0.270282200549529	0.0960998843278498	-0.11553841957596	-0.0891176060026254	-0.204693190964085
Id2	M4	turquoise	0.14273461733716	0.349077977294906	0.155918762087245	-0.108473919296118	-0.177512548364163	-0.297806765893759
Efhd1	M2	yellow	-0.046961719607683	0.127934387562901	-0.010150049519996	-0.0519225359544169	-0.0198281812838057	-0.104342577860054
Ccnd1	M3	blue	-0.00759770796888988	0.0436458961025706	0.054132978519662	-0.132928728272047	-0.0153785636278644	0.102485357644802
Hgf	M5	brown	0.0144439409431869	-0.030255350654839	-0.0486338374901341	-0.00661993792742049	-0.0613563341235496	0.103119330905829
Meltf	M2	yellow	0.00950757247888967	0.0643654007297479	-0.00532187985688259	-0.0436376846593253	-0.0596657490843526	-0.0562687380113012
Cxcl5	grey	grey	0.0651142759714707	0.0541949516714818	0.0214095623580499	-0.0534372058216773	-0.016084965976935	-0.0731820381960739
Lama2	M4	turquoise	-0.0024526328734362	0.358528655804956	0.080748946806249	-0.117497281330467	-0.0807469638829424	-0.298175366089382
Cd200	M4	turquoise	0.00760760395649688	0.265205813354081	0.155313219457117	-0.0892552798414993	-0.107286557524036	-0.211575050691651
Tslp	M1	green	0.180026562494627	0.0800903847524921	-0.0458456632729909	-0.0304955728589169	-0.0563479566522838	0.00680076164590811
Nr4a3	grey	grey	0.23352577917882	0.242802590764541	0.128117555655354	-0.0895654919871341	-0.163844986260655	-0.168479958509862
Cd84	grey	grey	0.0392235000310312	0.0821031936969844	0.060253214945116	-0.0525445722409423	-0.0531557587854606	-0.0212215735791902
Lrp8	M1	green	0.0638788525887503	0.0476763478665614	0.0295437533849324	0.0014282854843966	-0.00267778499326524	-0.0185475891202305
Rtkn2	M3	blue	0.00454230067819253	0.0349989641653411	0.0457890926417486	-0.0920508640490339	-0.0365487200600469	0.0222648024591939
Dner	grey	grey	-0.0474356740383852	0.142676838324609	0.0898098627041219	-0.0122547711785631	-0.0478258447302667	-0.144583631850539
Proser2	M5	brown	-0.00278809581717611	0.0183442194312444	0.00102489254165348	0.00533317083821024	-0.0452127018321505	-0.00976469257233407
Flrt3	grey	grey	0.0335034017114029	0.114771619368801	0.0280028583890037	0.0125971978730094	-0.0370630168015842	-0.0990005017538383
Stmn4	grey	grey	0.0448717274573825	0.128826053737264	0.0203058178883904	-0.0673716501704551	0.0059828682313938	-0.0937862419857987
Nr4a1	M1	green	0.532856100172195	0.309997654747238	0.0590705430358091	-0.0433926978521492	-0.15548269321397	-0.0294735578026578
Rasip1	M3	blue	0.0539067486691155	0.0862763283864143	0.137143169546466	-0.0443792284388741	-0.0318075171420104	0.0513019680223503
Vcam1	M1	green	0.150642997511446	0.15386325326453	-0.0195766241336632	-0.0801568727054548	-0.0960357407489519	-0.0179416055877552
Lims2	grey	grey	-0.042445998450847	0.190668546349557	0.0478650784101226	-0.0582824455251779	-0.0354103465332352	-0.118556109445057
Csrnp1	M1	green	0.51531954356428	0.390626542432684	0.159044186642536	-0.103371149332239	-0.187954541384885	-0.116147866752849
Oaf	grey	grey	0.068962088673228	0.302533016595672	0.0315535112734156	-0.139951181540009	-0.0878848995062229	-0.247516240618874
Sycp1	grey	grey	0.0126261840513487	0.0429910230153621	-0.0229359360933962	-0.0275154092457285	-0.00161485620572568	-0.0332226356160292
Lrrc32	M4	turquoise	0.0665952457113726	0.251842841798081	0.0397792024871457	-0.0244786841336165	-0.122923278755041	-0.214940406329167
Stc2	grey	grey	-0.0370732750487753	0.0943091263052544	0.0718148689107635	-0.0166484472335635	0.0182029179459574	-0.0562318243732838
Hspb7	M1	green	0.0749719621149688	0.0835582614073178	0.0456425715339608	-0.0595102883421476	-0.0406196250391967	-0.0162109124883908
Islr	M4	turquoise	-0.0309589115607302	0.427387997801085	0.11730314943	-0.157642543993523	-0.13368876633081	-0.403018098903338
Rasgrp3	M3	blue	0.0572629728934926	0.0861524809870613	0.114187104511192	-0.0188012638935819	-0.0778505962519175	-0.00578273333111585
Egr2	grey	grey	0.220148894475472	0.283991529582759	0.0503552681369861	-0.0950601722540969	-0.116305147549401	-0.164645274521426
Gdpd3	M5	brown	-0.00285239207888603	-0.15112296414065	-0.0668198712365949	-0.114182338260379	0.148652677928045	0.361600303151654
Cav2	M3	blue	0.0383143002581872	0.137942485876471	0.144026157580315	-0.103439790438422	-0.109103220303186	0.0126408514442569
Fam180a	grey	grey	0.0314785632841613	0.196337701480415	0.076091981191217	-0.0932223272616796	-0.13517598523329	-0.144538500059092
Cav1	M3	blue	-0.0147322585785723	0.287475914706371	0.19363719715182	-0.163413706190698	-0.149069436687048	-0.137986197336586
Rplp0	grey	grey	0.232389802317408	0.602022957596633	0.308152622008699	-0.24115930160348	-0.279937173802478	-0.29245853978091
Ddah2	M4	turquoise	-0.017683303100925	0.402904498696079	0.159596363186066	-0.202449388795152	-0.103332934147312	-0.308390177810152
AI429214	M1	green	0.0534125596792167	-0.0161973766377062	-0.0227964690497847	-0.000260629429572971	0.0311306542834613	0.0851468924051612
Cish	grey	grey	0.193025760376671	0.193671035800686	0.137943774249543	-0.0849796524268202	-0.148243314920857	-0.0859911414548005
Mdk	M4	turquoise	0.00463757611795712	0.218165164134691	0.144245005684108	-0.063628164973582	-0.190464626113754	-0.2359372019483
Pdlim4	M2	yellow	-0.027250574790694	0.232344276293317	0.0549335197125542	-0.114393975950324	-0.0955830031961314	-0.2316210382386
Podn	M4	turquoise	-0.0256990252115007	0.258299661438472	0.190538769446796	-0.0117804970404282	-0.0842199095246799	-0.269423931520199
Trf	M5	brown	-0.00825645593483669	-0.189489691973575	-0.157068073903073	-0.0786352299196334	0.173634048924796	0.383556196020616
Ckb	grey	grey	0.013470400186054	0.286319717548562	0.118602993428892	-0.0872253585657238	-0.11313374884747	-0.157416732144909
Itga1	M3	blue	0.0898375971996759	0.16676958590397	0.0979791834626599	-0.104410738339273	-0.0704148407755362	-0.0282850788776924
Pcdh19	M4	turquoise	0.0310840124304941	0.206747355963436	0.0334934094531312	-0.0622691255607531	-0.0339878169294694	-0.167117016136466
Kdm6b	grey	grey	0.350777887249819	0.346132582683101	0.0732619780808743	-0.168084230793011	-0.131016855886288	-0.157255640552556
Loxl2	M4	turquoise	0.0346984977571364	0.304213146098227	0.0726965758112718	-0.106436569668632	-0.119619307849019	-0.267746880331873
Nfkbia	M1	green	0.652129754981576	0.510749823892029	0.147267973532888	-0.137219701099387	-0.174130114525327	-0.165691260890827
Lamc1	grey	grey	0.0326842431767462	0.335390576013985	0.0226420511732877	-0.134664155980283	-0.0155228805785234	-0.249778080586875
Otud1	M1	green	0.198453005064203	-0.0409393650576083	-0.0595639022233327	0.0324556965621591	0.0769363999126607	0.144625999155337
Tyw3	M5	brown	-0.0551494532772283	-0.026504837459325	-0.0143299545711903	-0.0641252555804115	0.0322553993189279	0.022991435768619
Wfdc12	M5	brown	0.0273482679476489	-0.0141406198568043	-0.0238152928485386	0.0275737853073893	0.0374660826599336	0.0669840579640362
Adgrl4	M3	blue	0.0728401821466732	0.0896061512488248	0.111025909089906	-0.0277640743283972	-0.0475611983348615	0.0624782690790601
Ecm1	grey	grey	0.011201282365435	0.131439635786961	0.00496723915418405	-0.182667103784002	0.0659388677293693	0.0653471770359347
Man1a	M4	turquoise	0.0622897349711639	0.354596624509618	0.0521401569615173	-0.145773626094756	-0.0693379092285872	-0.271040771734278
Des	M5	brown	0.0203744639418804	-0.0470237341244934	-0.012510042340371	-0.142201364682792	0.0126531893125603	0.165125894931388
Tspan7	M3	blue	0.0191149617483551	0.134229715939344	0.133608160993214	-0.0598921298368828	-0.0672679680731303	0.0226960161443295
Ifi202b	M2	yellow	0.0192109474925417	0.210946627006674	0.00730662377560784	-0.0809560613828325	-0.0139233808454922	-0.190199711696026
Lsp1	M4	turquoise	0.000312747362180122	0.370349335380765	0.0865782263469188	-0.146730478325486	-0.101633580317261	-0.326915069672615
Stmn2	M3	blue	0.00156127148307089	0.0393003757160439	0.0478088560710407	-0.0646909503705257	-0.0470579843185842	0.0745605956463486
Plagl1	grey	grey	0.161784155855072	0.206807860797683	0.110234205223679	-0.0996718921922582	-0.118475462033788	-0.144203046584144
Nid1	M4	turquoise	0.0432598398315877	0.403106143952698	0.0413612340840552	-0.124043397399619	-0.0754257724590113	-0.290218371104019
Col4a6	grey	grey	-0.0378912885382613	0.216001512554903	0.138405465090981	-0.0212784254430147	-0.0810182433947335	-0.205890864578531
Pnp	grey	grey	0.336016344032727	0.402659461630044	0.107905172867515	-0.071893711032515	-0.10421400664331	-0.238390160218637
Rnase4	M4	turquoise	0.0205180175385588	0.468494154522185	0.167800547055429	-0.120417053994362	-0.155696077909716	-0.38522676186077
Car4	M3	blue	-0.0202015175249569	0.0480178406709662	0.0693251907554283	-0.0830068646420153	-0.0390787431191066	0.0430111002739491
Cyb5r3	M3	blue	-0.0498830968849598	0.19394056693222	0.0935582793717825	-0.187619184380102	-0.041405708600292	-0.0374472122411167
Msx1	grey	grey	0.0522655462578825	0.22999721298885	0.0878310976544502	-0.0590610024090285	-0.110774493911924	-0.180102378066567
Gprc5a	M3	blue	0.0120671261427452	0.0211216017737894	0.0135832673323195	-0.0386302145668147	-0.0332602046386655	0.0476286940637659
Fgf18	grey	grey	0.13162598760959	0.222339046700853	0.222192067511557	-0.106976645479223	-0.217751876812799	-0.198146678132766
Hilpda	M3	blue	0.0362313114460959	0.111121898191414	0.103823360644645	-0.0966023214233482	-0.0668384658712809	-0.010935156551106
Cdh4	M4	turquoise	0.10373897434316	0.200975172296083	0.226352603642872	-0.095806021660191	-0.259109245335952	-0.195117926565234
Lmo1	M2	yellow	0.0120470306310159	0.101933295869248	0.0130418265910253	-0.0152659731103605	0.00815599765524086	-0.0908527099637945
Celf4	grey	grey	0.0311794090384182	0.0622450393791998	0.0108573619416063	0.0101615040364965	-0.0176918820580079	-0.071596131716173
Synpo2	M2	yellow	0.0718725710111818	0.194719716449391	0.0873753762188481	-0.0807411804204143	-0.164543185393527	-0.155649794182271
Areg	grey	grey	0.0310859002956337	0.0529924461175193	-0.00372684942791406	-0.0517084022629021	0.00157681678053515	-0.0424793154097234
B2m	grey	grey	0.100407068723756	0.432150021528098	0.218744634990585	-0.197908217738485	-0.273580585999472	-0.181284823239118
Gas6	M4	turquoise	0.0324760440002961	0.339941421116787	0.228221878194652	-0.0791017335669148	-0.224063776280885	-0.26569217693173
Sulf2	M4	turquoise	-0.0177634522200912	0.308562428173785	0.0494337123625627	-0.0996362332509342	-0.0251226250954775	-0.278863248877513
Pappa	M4	turquoise	0.0189821745906438	0.167732281351059	0.0651840280757627	-0.0650462984545875	-0.076603694732868	-0.137671484301392
Samd5	grey	grey	0.0391456982689406	0.10904608154432	0.0540982212711919	-0.0490744105436969	-0.031647266652221	-0.0624363828667566
Tmem158	grey	grey	0.00688322257156287	0.185213648573316	0.0376329948549006	-0.0789170660849163	-0.0883682994591935	-0.157644903113355
Plaur	grey	grey	0.143925073965366	0.260185033167798	0.154436210590905	-0.0544406926614334	-0.156927849397877	-0.181575694812896
Icam1	M1	green	0.447328639769645	0.304547111055739	0.124981766523625	-0.0755703875912988	-0.100206897936222	-0.0445571889885916
Cyp26b1	grey	grey	0.0308514691507233	0.0581521729327842	-0.00775073417948859	-0.0436878152609572	2.92983633326291e-05	-0.0359859509843981
Gm43936	M3	blue	0.0533700751536345	0.0398771274238121	0.0609358130327592	-0.0002493451804188	-0.017822031957818	0.0106103496033236
Pmepa1	grey	grey	0.0730502314443942	0.435697098029916	0.220230274789452	-0.097720035558102	-0.271489564851256	-0.350689467279636
Prrx2	M4	turquoise	-0.014071462264109	0.209212585428244	0.084150180643047	-0.0707649992799824	-0.0424869930627931	-0.206799177488534
AY036118	M5	brown	-0.0223075172564889	-0.00182436681496138	-0.00397078694182293	-0.0712871577826132	-0.0679228083044391	0.0899538843522351
Cpxm2	M4	turquoise	-0.0502489005990732	0.174486851086598	0.0691120126506151	-0.00834562886669738	-0.0407121220472044	-0.18362414539738
Gm15853	grey	grey	0.0319581974875124	0.0392917574778508	-0.0123596014130208	-0.0334615853357398	-0.00603691782741193	-0.0119924645906061
Depp1	M3	blue	0.0447689021190334	0.0559135942484954	0.00957010957131981	-0.00964618951697435	-0.0110359249814707	0.00152546437386368
Cadm4	M2	yellow	0.0187080071306395	0.0327057125076425	0.0365633074364168	-0.022719703034463	-0.0384681202395588	-0.0584589745500025
Scel	M3	blue	-0.0244745527985211	0.0215873442026349	0.0155895339782434	-0.0308628204110461	-0.0221512533176077	0.0336323339000966
Gcnt1	grey	grey	0.0640811836970337	0.0838907366187059	0.0895026338383655	-0.0645104795222736	-0.0810115300074938	-0.0417798058561978
Lamb2	M4	turquoise	0.0444630037418789	0.345562687537387	0.144394136624517	-0.130561433116905	-0.0773713640046571	-0.29040400204733
Pcdh1	M3	blue	0.0477829696566546	0.0880802440503256	0.109989116788061	-0.0363165142508046	-0.0744774609555606	0.00617506736938522
S1pr1	M3	blue	0.0763090487156335	0.096334579880266	0.112345499776843	-0.0364924787880873	-0.0513095242437247	0.0172105154317859
Cd44	grey	grey	0.234717698613217	0.342893809066531	0.149095256690663	-0.149667774871796	-0.202994971401652	-0.235533787737578
Anpep	M4	turquoise	-0.0308520517413236	0.278981371932905	0.0865266904402243	-0.0513329439941162	-0.0199251751234579	-0.281616680064106
Dleu2	M1	green	0.169951709498141	0.0198381440026756	-0.0102319114497261	-0.0271005942986923	0.0218560284074247	0.0694866004066212
1500015A07Rik	M5	brown	-0.0164153354176607	-0.0440976630846552	-0.0456411648931165	-0.00941176188428578	0.0511033810265546	0.0670615757476189
Clic3	M3	blue	-0.0437487451990528	-0.00438842578354411	0.0700460114759741	-0.157352592896243	0.00437722141605608	0.131229891913842
Casz1	M3	blue	0.0670416225388339	0.0951326119742665	0.0958504434639659	-0.0495843705926322	-0.0529600825265246	0.0271368970161842
Gngt2	M3	blue	-0.0400194760746624	0.175814389407046	0.0710898704204104	-0.119821350900273	-0.00454083055602624	-0.065275160313996
Foxs1	M4	turquoise	0.0229818981296345	0.133720023313661	0.0750378162369864	-0.0026064892941911	-0.0211019122277379	-0.124220333913359
Gm45187	grey	grey	0.0803880074278673	0.109157464002077	0.0857644826831688	-0.0542063493266795	-0.0131147511422497	-0.0823992125507163
Actn4	grey	grey	0.0890424145318548	0.292623812753755	0.0691154579540196	-0.0999554805154721	-0.121846193245077	-0.162766936265413
Qpct	M4	turquoise	-0.00314296975409984	0.401012005347633	0.147271687426223	-0.122527374645497	-0.0752146349505163	-0.366623539601134
Ndrg1	grey	grey	0.0978323480020659	0.237256760466636	0.0186427457068636	-0.0924760105964535	-0.028367468920528	-0.123464691149094
Bdkrb1	grey	grey	-0.0176674361059961	0.092368768699494	0.0833184861981257	-0.00276071348080776	-0.0802241827210702	-0.0828210839530306
Gda	M4	turquoise	0.00751005005682734	0.23092850974085	0.0464712089063972	-0.0918534800856279	0.0025939142888922	-0.208182790846188
Lgals1	grey	grey	0.107432096855912	0.541426610528882	0.248574846105014	-0.14591789596338	-0.350123121080541	-0.363321855187588
Tshz2	M4	turquoise	0.0342701872073596	0.310404941083962	0.134144034570232	-0.123601592995846	-0.178447286546908	-0.301095125505283
Sphk1	grey	grey	0.20761553892584	0.266903406702471	0.076823237437176	-0.0409980432305135	-0.135966455525797	-0.150861805302771
Ccno	M1	green	0.0917805707427724	0.0320362551787289	0.0223016666011269	-0.0412365665045756	0.00342720233464585	0.0171944474302456
Plk2	M5	brown	0.250838689252165	0.0776963922400889	0.0137881295881193	-0.0486365676882881	-0.0332402617733259	0.127905941027007
Foxc1	M4	turquoise	0.111611480289152	0.240106494672859	0.0229778187635287	-0.0799539693353567	-0.0628667443264844	-0.206118586738504
Sulf1	M4	turquoise	0.0724888975739526	0.367934058259617	0.163986301235871	-0.100323374100979	-0.138460179770282	-0.335777436199487
Emp1	grey	grey	0.159522762399784	0.441660487245321	0.159009391860102	-0.203557642314757	-0.144497497488268	-0.198423308011634
Tuba1c	grey	grey	0.151251534852569	0.272427325883587	0.076171598583453	-0.0988838399872287	-0.100991548025866	-0.199402288740813
Hist4h4	grey	grey	-0.127503963455426	-0.0463041564300227	0.0289806729834504	0.0304664303718738	0.0101018358947489	-0.0352364586886887
Gsn	M4	turquoise	0.0219022775144866	0.325784304896739	0.00949218460136908	-0.125409979165032	-0.0556864422485588	-0.0258991280796139
Brwd3	grey	grey	0.0449411272181575	0.0580421325212276	-0.0128391981821904	-0.0254431046308212	0.0158893587375097	-0.0221945455942816
Dll4	M3	blue	0.062183698638139	0.0529887186333506	0.0837653410280247	-0.00980716706368867	0.00497289212011653	0.0523529632606256
Add3	M4	turquoise	0.0609851360288612	0.429138629447796	0.179909439989715	-0.141956917485889	-0.148502942309774	-0.354415151523068
Specc1	M5	brown	0.0737104660350239	0.0574002754610113	0.0118353244901365	-0.0254284682480832	-0.0612322335577351	0.0097405218047318
Gbp2	grey	grey	0.0257443988343087	0.139700819730075	0.0501952480107157	-0.0706689543379984	-0.0584058618278793	-0.134656545094318
C1s1	M4	turquoise	-0.0132133689737825	0.365348467534651	0.13152138566057	-0.0874641350343014	-0.108475159985333	-0.306737666732813
Serpinb6c	M4	turquoise	-0.00100398728252478	0.106797001973456	0.0546013931717199	-0.0316103096382743	-0.0149863775924861	-0.0896071234112904
Nrk	M2	yellow	-0.0162408024709222	0.0993479050325269	-0.00754417974871559	-0.0454894071413927	-0.0435115519795537	-0.0969912345179292
Ebf2	M2	yellow	0.0408688700942355	0.226233859808052	0.0266689098823107	-0.0969771134892761	-0.0281490653371441	-0.194380979766008
Sowahc	M1	green	0.224409010212152	0.0857452088624474	0.0510144505205083	-0.0567743937813676	-0.0311760893490583	-0.00997547214565407
S1pr3	M5	brown	0.108385501381222	0.032092437462944	-0.0126347939650757	-0.103271260952917	-0.027895316312772	0.0571409156511591
Serpina3n	grey	grey	0.0407029434233477	0.192826335952392	0.0887005881590902	-0.0757094295359914	-0.0612728018396825	-0.0733358818556133
Gucy1a1	M5	brown	0.0082052349947199	-0.0403698775760239	0.00102217669153902	-0.0500951494766289	0.0467315762316214	0.161015428259752
Gm20186	M1	green	0.122749227033478	0.120397766002954	0.037985547291924	-0.0615734464011405	-0.0278071791455543	-0.0400212268554465
Col9a1	M2	yellow	0.00199016727835123	0.0518530198842994	-0.00452743059096372	-0.038527615009419	-0.0575666064911088	-0.0481484338194894
Gm44751	grey	grey	0.0467697662985353	0.0181774137022116	0.00219206409002107	-0.00206985325148358	-0.0441498844396108	-0.0576201160965867
Piwil2	grey	grey	-0.0260485710613168	0.00810710099266232	0.0296755405233966	0.017150846468037	0.0160913945862644	-0.0129283995734825
Lcp1	grey	grey	0.032451337958566	0.0548271753942692	0.0689633891817401	-0.0406571963258867	-0.0108886055461778	0.0286598919823304
Cstdc2	grey	grey	-0.0286690543632007	0.00475613977306165	-0.00620727888813988	-0.00257894391940542	0.0168034920736243	0.0154827030933479
3425401B19Rik	M1	green	0.0667359058928535	0.00260032689677498	0.0221395398784088	-0.0121286393146262	0.0231393089700198	0.036348463668202
Gata6	M4	turquoise	0.100554790012087	0.351808313691458	0.169801397684021	-0.0766980717342472	-0.155087137774233	-0.312387557649387
Mfap4	M5	brown	-0.117798418503093	-0.192614368520985	-0.159001657174254	-0.1017972679227	0.31486756326743	0.408332880980945
Pqlc1	grey	grey	0.180083184604846	0.209838613701801	0.101211271853361	-0.0562279679249572	-0.125610295769458	-0.107969103253803
Ifi207	M2	yellow	0.0416074046893297	0.179592123374856	0.0214737155890627	-0.0551916702810715	-0.00735906220239419	-0.165716103586206
Cdh13	grey	grey	-0.0114854412197384	0.0450141179494648	0.0162181868600817	-0.0115041899645321	0.00660813887338404	-0.018719305929437
Gm2814	M1	green	0.0333233993742926	-0.0075036787982432	-0.0184576321593731	0.011093239843566	-0.026242043986949	0.0468319000452492
Cfap53	M1	green	0.119330945528112	0.0885654020478667	-0.0156332272935572	-0.0622506905442849	-0.0171273034721261	-0.00608018366450061
C2	M4	turquoise	-0.00847207399118639	0.19012772322743	0.116730284160018	-0.00547692175700369	-0.143239810578126	-0.192166603810247
Tent5b	grey	grey	-0.00135102265114625	0.0686272622485941	-0.0232919615030212	-0.0229931300064333	-0.0215762835110016	-0.0593677153486578
Tead4	M3	blue	0.0237762733843755	0.0284709871334318	0.0316780069203291	0.00141019902899499	-0.012827940525516	0.00484659493532462
Apold1	M3	blue	0.00291708708575558	0.0480468377040388	0.011694255358489	-0.003338238328162	-0.0415359005087075	-0.0194930857457366
Sln	grey	grey	0.0194335351063956	0.0262088405687669	0.0244036908594907	-0.0191863013595266	-0.0316040005502479	-0.0494455950689996
Rims2	M2	yellow	0.0402809399852708	0.0857173362065328	0.0118266025158863	-0.0324978067275825	-0.0733517729718185	-0.0731365753026251
Abcc9	M4	turquoise	-0.0332331848017076	0.302064848758435	0.245953774546946	-0.0640175506645487	-0.153934130804366	-0.317533018974757
H2-D1	grey	grey	0.165782400794785	0.490472109236595	0.191722892814662	-0.210109439558468	-0.196421900851526	-0.181982103800713
Ggt5	M2	yellow	0.0236632531556133	0.166839231925697	0.0220949649914289	-0.031180165549847	-0.0298050073170445	-0.16567690045332
Gm6277	M4	turquoise	-0.04813944597608	0.10070992747548	0.11818006804748	-0.0174187242839259	-0.0258996081776067	-0.11023657938454
Ltbp2	grey	grey	-0.0267737872331377	0.130387326129425	0.107752070034362	-0.0387307170256848	-0.144745397479767	-0.124735671221192
Mafb	M5	brown	0.135427010966298	0.132033939785208	0.0418505352401326	-0.0597014163181223	-0.0870976619494683	-0.0402092663614388
Ass1	M4	turquoise	-0.0249525387159559	0.221775102825332	0.129091599491635	-0.0709278469914517	-0.0831019570956668	-0.202791469567004
Hes1	M1	green	0.296947972363637	0.0726958734095435	-0.0723280208148469	-0.0325135113339199	0.0568857362996995	0.152175204752154
Gadd45b	M1	green	0.655701513495555	0.320558172185569	0.0484592308540139	-0.0875667150962484	-0.0768369265127896	-0.003989704532901
Bach1	grey	grey	0.172851004498167	0.212602179863404	0.0737971666672975	-0.0939075415840078	-0.115131124502025	-0.139967292836351
C1ql3	grey	grey	0.00920061483659695	0.126156495266805	0.0127257547798802	-0.0394990892261444	-0.00557896708644024	-0.0961199394958237
Ngf	grey	grey	0.0665702027947926	0.200393764204406	0.0235824990268068	-0.116179074776365	-0.049951451851252	-0.167128563856824
Adgre5	M3	blue	0.0556525152874818	0.0885893384528215	0.0956535360237963	-0.0430324151726318	-0.0538500707645567	0.0462406714600291
Gxylt2	M4	turquoise	-0.0025563465707841	0.298694722663319	0.116995345699728	-0.103437404912873	-0.071707369366263	-0.278842441223851
Ece1	M3	blue	0.0697315267676993	0.289418050441559	0.163236452176933	-0.155493761249462	-0.11193855817628	-0.177426517906745
Arc	grey	grey	0.107957173223908	0.1605875498507	0.0502082577569645	0.0511438868037461	-0.0862109594976685	-0.133028962159906
Mical2	M4	turquoise	0.0377549359042765	0.259727619345983	0.141807287634125	-0.10491209291644	-0.0666591372903993	-0.250620306063434
Klf7	grey	grey	0.185532515936402	0.358555709585561	0.231725498621207	-0.083413204580127	-0.210320643019003	-0.214753272405357
Gm11725	grey	grey	-0.0027169429519624	0.0552441143200135	0.083108446212397	-0.0153905282499651	-0.00338800968287791	-0.0360423871298777
Dcaf17	M5	brown	-0.00892554973915649	-0.0407156684766662	-0.0546344781052029	-0.0277373438230006	0.043268127581112	0.0865146413579091
Sbno2	grey	grey	0.248092195235648	0.215626961943861	0.132928547184422	-0.103544414047865	-0.124368250344391	-0.101793459221813
Inhba	M2	yellow	0.0521577478310786	0.236651598632589	0.0243632089595757	-0.104902565976406	-0.0555991175546095	-0.198206343728866
Kdr	M3	blue	0.0350934583889701	0.0739691025651985	0.0679995558676155	-0.0405069382031676	-0.032924165629105	0.0328677270838665
Fam78b	M2	yellow	0.1109273718052	0.15400910198441	0.053991209072297	-0.0823276375712742	-0.117730327179311	-0.116899004037262
Zc3h12a	grey	grey	0.192331812940685	0.189720887813898	0.0603652918211849	-0.0341252588953744	-0.0546969873592518	-0.104154317466502
Cadm1	M3	blue	0.0570511939994381	0.107515112221257	0.14831202147341	-0.112925619034098	-0.0878777041939789	-0.0236848071024354
Rcan1	M1	green	0.332119976986373	0.243177871142318	0.117035781380275	-0.0860724906135935	-0.0621281487529754	-0.0594572685971798
Tnnt1	grey	grey	0.053363124820122	0.0343823602637755	-0.00584812649978452	-0.0334402145150826	-0.00768881674371348	0.0262088613861255
Sox7	M3	blue	0.0771586064392768	0.118817295234991	0.119672597575873	-0.00446291022644596	-0.0383997822693535	-0.00502292601694881
Tfpi2	grey	grey	0.091685435679327	0.113455132540874	0.0278557809223635	-0.0312107989355543	-0.0581114108549988	-0.095310798170488
Cnmd	M2	yellow	0.00618575127851963	0.0595549778618659	-0.00516728410263554	-0.0435607139646433	-0.0521990862392849	-0.0552069468995693
Il1r2	grey	grey	0.0532794633372571	0.0855014515216549	0.0573390154227689	-0.0146759307197197	-0.0268274124178812	-0.0889377768916598
Qprt	M2	yellow	0.0483691029257061	0.0747523886720997	-0.00810708796311262	-0.0410055187197638	-0.0374665608686184	-0.0796052034145165
Ndrg4	grey	grey	-0.0390835578079321	0.0998251723950593	0.00363260656621018	-0.0303970938925974	0.00364634518751373	-0.0848246531276733
Gm20337	grey	grey	0.0458900246370016	-0.000631880861047509	-0.0283583044828723	-0.0347220596908993	0.0291813169166166	0.0375874926919144
Hck	M3	blue	-0.0145837479147661	0.020417593270974	-0.0119579928716073	-0.0317886173550308	-0.0266904948330645	0.0249709993069425
Cyth3	grey	grey	0.0673537019689328	0.352838731645306	0.167528621699434	-0.138894972903605	-0.105621563579481	-0.235300533507374
Pde3b	M4	turquoise	0.0026026601675473	0.166835642996846	0.095245991423513	-0.0473456260023449	-0.031147890636678	-0.156910949362035
Id3	grey	grey	0.38588569877656	0.435718095909131	0.183691187662576	-0.0630662102437842	-0.216022423164811	-0.253375026624507
Galnt15	M4	turquoise	0.00362304883751226	0.274406001696779	0.135164183958175	-0.0310243469072798	-0.0648366071467336	-0.245108238697168
Ndnf	grey	grey	0.0199256187684502	0.117763587960039	0.0321420592460744	-0.066671841478329	-0.0682970897907946	-0.0603361347210249
Myzap	M3	blue	0.0664748852977699	0.0969919150686416	0.0948633710388682	-0.0907033856952079	-0.0391031124805901	0.0369631607490068
Sox17	M3	blue	0.0629750219360545	0.0798016255825575	0.0979889149540277	-0.0448033659050216	-0.046766029693547	-0.00114847330228145
C1qtnf3	grey	grey	0.0281179091156668	0.134922414592094	0.0406627449829526	-0.0216623737386241	-0.131313886565941	-0.111595633376516
Gm20342	M5	brown	-0.0197481703857067	-0.0638474535946575	-0.0377896070259465	-0.023615042538639	0.0747944463896984	0.109960118077418
Ttyh2	M4	turquoise	-0.01108647896174	0.135790034447937	0.0245055893997733	-0.04808970836088	-0.0609401102488949	-0.123842141233768
Phgdh	M4	turquoise	0.0264568890211909	0.22223993827917	0.0732602647374591	-0.0930356523110688	-0.0688620299668321	-0.208494367372101
Ntn1	M4	turquoise	0.0547229037072579	0.370399463887338	0.157361386330878	-0.122472242581958	-0.0980771414751193	-0.322567045582797
Itga7	M1	green	0.218229263925979	0.117854944549089	0.044710696585812	-0.0542194856116692	-0.0571974478873956	-0.00987756745301316
Pde1a	M4	turquoise	0.0491216814536654	0.251577695500477	0.159895812348874	-0.0860541669603572	-0.19829416436653	-0.2445702505426
Bmp1	M4	turquoise	0.113062670669111	0.356264608640702	0.0888994101366699	-0.119286080653836	-0.0747438860715106	-0.282227771491229
Hist1h1c	M3	blue	0.0428625622954423	0.0927314823593699	0.0190223259722814	-0.138272910831614	-0.0376295185069029	0.010618428825653
Rgs7bp	M4	turquoise	0.00793781576238398	0.142571104087116	0.0898614099656942	0.00158724049706337	-0.124866566913187	-0.168725893935983
Nhs	grey	grey	-0.0154073022479317	0.10865963046431	0.0722256212431628	-0.0178992863918123	-0.0776321773278147	-0.0814898699882782
Ifitm10	M3	blue	0.0146013987432561	0.0379098110077547	0.0539049096294427	-0.029911540217373	0.00446911141368151	0.0227753573264556
Cxadr	M3	blue	-0.0150658956996973	0.0193516212710712	0.0308516595456704	-0.0465527675005405	-0.0493493967265167	0.0168977344804982
Ahnak	grey	grey	0.0746313420163313	0.373571873995297	0.197452271016504	-0.282312640092438	-0.164893512105202	-0.182956847432226
Fbxo32	M3	blue	0.0650498141829699	0.0755450300100934	0.0427134588440329	-0.0590626476278379	-0.046445477227051	0.00241029745709982
Cemip2	M3	blue	0.119746374623304	0.186462432434476	0.0797907870961438	-0.0770643665245602	-0.11301871853968	-0.0539119915330588
Gas7	grey	grey	0.0746681504751784	0.326508148376461	0.121008565336889	-0.029299541652485	-0.185812764617753	-0.245602549967228
Rpsa	M4	turquoise	0.179402340510792	0.669382369116821	0.298643961410667	-0.253993417535047	-0.33391808411524	-0.423432075955731
Mfap2	M4	turquoise	0.0366379173963941	0.353071936065364	0.1528277450349	-0.0978365442676844	-0.108364848171074	-0.311783564397936
Pdgfrb	M4	turquoise	0.0705243232821674	0.31360906765964	0.131512114872333	-0.112769211094132	-0.125029588305131	-0.293804057932815
Baiap2	grey	grey	0.241300574815771	0.383148530795489	0.13431381430805	-0.0892522973380307	-0.137487120144644	-0.261454709615147
Cstb	grey	grey	0.118986996396772	0.212404283108891	0.0303841482453529	-0.0912736971000011	-0.103534607697474	-0.0740223719523929
Dusp5	M1	green	0.187671576095106	0.135612021595072	0.0631241683106109	-0.0374397561713508	-0.0696825263970605	-0.0406970873176695
Bambi	grey	grey	0.195722693181684	0.194251226856911	0.0837516913829089	-0.0604637114045469	-0.153031970437017	-0.0931676181715788
Fam71a	M5	brown	0.242848802615103	0.0767284661060296	-0.000181478796574613	-0.00470550399810894	0.0217562678441958	0.0739486085658975
Tubb2b	M4	turquoise	-0.0319026440120911	0.278974995252698	0.100823743640668	-0.074236332310028	-0.0634763217869983	-0.260242595143459
Gap43	M3	blue	-0.0223895383031539	0.0391185559136848	-0.00217261748775419	-0.0969722916623891	0.0338600974344523	0.0196176902067287
Thy1	M4	turquoise	-0.0214405912847386	0.247895768223516	-0.0067578531343131	-0.0980049257546485	-0.0231162598723408	-0.214367665174121
Lysmd2	M4	turquoise	-0.010659737069467	0.352142076314592	0.124833010975744	-0.128421986272786	-0.0787523456608535	-0.289459846155067
Platr22	grey	grey	-0.0368101969542579	-0.0143674903429896	0.0222516269172673	-0.0044765520618759	0.0195512889857289	0.0124498100720772
Cd52	grey	grey	0.0322219134768107	0.0678244026602903	0.0423929444227088	-0.0742056604905032	-0.00829219454241671	-0.0092982931426658
Zim1	M4	turquoise	-0.0220074054021142	0.0444215650951076	-0.0129701450929212	-0.00680430176890293	0.00271492982500675	-0.0664897782460195
C130026I21Rik	M2	yellow	0.0103698906256904	0.0837100734910485	-0.00603622909327884	-0.0280188472170279	-0.00884280002551651	-0.0689955290064293
Gdf5	grey	grey	0.039635767769518	0.0468219273647259	-0.0012988794467794	-0.0252843829688269	-0.0741490188818182	-0.0171563092537619
Ccdc18	M5	brown	-0.0176863049616172	-0.025299520442363	-0.00738396322629625	-0.0115875173321363	0.0320556276895021	0.0314613277644065
Prc1	grey	grey	0.0434526428194311	0.0228391401901854	0.0177772178952282	0.00716474556591089	-0.00579514807834594	-0.000147030448657781
Sprn	grey	grey	-0.0370101897810717	0.0712486240308964	0.0714535294984366	-0.0243783102577454	-0.0122951318199356	-0.0655839586089327
Tmem102	M1	green	0.0371924558920979	0.0338684629983849	-0.00623204904018115	-0.0338922084019349	-0.0118534674863728	-0.0290648034290674
3930402G23Rik	M1	green	0.109695135374413	0.0710599215291118	0.0251246504582956	-0.0638884182882568	-0.0103870634771622	0.0117092683929151
Nol4l	M5	brown	0.0434133121077396	0.0263896243992808	0.035488878641402	-0.0166675700735879	-0.0221994606536435	0.0110698804668891
Col5a1	M4	turquoise	-0.00433861796911833	0.407434735053399	0.116993094038683	-0.112387481308946	-0.110109370049281	-0.365016698936591
Emp2	M5	brown	-0.0261161873975451	-0.180837822632354	-0.13078481728534	-0.179178845296048	0.171358255388129	0.389746170580205
Cdkn1c	grey	grey	0.087876722928384	0.237544092931975	0.140723795543046	-0.0833243271727213	-0.155390332690086	-0.157782632054333
Mmp2	M4	turquoise	0.0214519297418762	0.384090097314829	0.135431630025574	-0.082160228498446	-0.147062133978744	-0.236893260506725
Cldn10	grey	grey	-0.00468801590701227	0.146990027268395	0.078298687140748	-0.0459612616840655	-0.0380457557744497	-0.119313024042681
Filip1	M1	green	0.154571666517364	0.10010771039413	0.0507615407625187	0.0170391834378261	0.0137041601513464	-0.015386357171643
9330121J05Rik	grey	grey	0.0628227336337804	0.0313688398776445	0.0134852425679272	-0.00917531136762488	-0.00859022078204451	-0.0465923922371952
Gm38102	M5	brown	-0.01244836219731	-0.050060736863624	-0.0324025802714489	0.0512954413381283	0.0431384991379096	0.0413735089847958
Acta1	grey	grey	-0.00296845538285134	-0.00348120699065101	0.0236786716112212	0.016176027600355	-0.0142803085200884	-0.0494994545583929
Wfikkn2	grey	grey	0.0138104230420705	0.0636897995173046	0.0792795897008398	-0.0812477613045713	0.00835013454322186	-0.0508922465396999
Col11a2	M2	yellow	-0.00914783423437707	0.0413333998320316	-0.00451504760894166	-0.0306986251966914	-0.0224398595979887	-0.0414921113667684
Itga5	M4	turquoise	0.0841213550547253	0.267315406271898	0.0926000623080207	-0.0972695215007722	-0.0761560680337796	-0.224257440772429
Gm15728	grey	grey	0.0671242219130297	0.102548620145107	0.0621497560802898	-0.0286788501263303	-0.0103412164956594	-0.0601267155854421
Serpina3f	M3	blue	0.0604612805276609	0.0602067892914926	0.0587813097681126	-0.00398765803975511	-0.0261747309287163	-0.0243576265146783
Fam107b	grey	grey	0.150621663377212	0.236031078621924	0.088566023320944	-0.0656526383374392	-0.149012844413269	-0.175570972579484
H2-Ab1	M3	blue	0.0634737174029529	0.116403653165047	0.158527820078335	-0.0525479260127971	-0.125893731260757	-0.0490123418556479
Socs3	M1	green	0.577689102176569	0.378373146038241	0.0710355460799624	-0.0856407705190481	-0.0996534636890277	-0.108508023631955
Resf1	M5	brown	-0.0265327534839905	-0.0171222757750962	-0.0654190307808013	-0.00781554870097977	0.0622265567894746	0.107252986089833
Cks2	M1	green	0.180798715419621	0.085781206709014	-0.014622694000206	-0.0431941467084516	-0.0334853604623992	0.0284826815838787
Tspan18	grey	grey	0.0425596120537571	0.201763882845153	0.163612940440547	-0.0608231290832553	-0.0677070086747141	-0.0922427152659921
Lcorl	M5	brown	0.0843323325661789	0.151297519921837	0.14699782234788	-0.070032678169451	-0.209869044887936	-0.131161830206419
Arid3a	grey	grey	-0.0109833427842127	-0.0123492004466931	-0.0199829490897113	-0.0238908597845238	0.0153684575727277	0.0351942496849322
Itgb8	grey	grey	0.00115686949546711	0.121898434772929	0.0526295372610303	-0.0239036310087618	-0.10294845758711	-0.115594843014066
Adam33	M4	turquoise	0.0678302307237892	0.228924654691046	0.190433360954987	-0.108084472805493	-0.23007802251353	-0.211692412700377
Slc9a3r2	M3	blue	0.0141476401168498	0.0467636355618238	0.029487963531437	-0.11260622726125	0.0146709864762762	0.151728009692528
Kit	M3	blue	0.101513032920766	0.119538264075895	0.121932452613444	-0.0448934098733801	-0.0861895605261599	-0.0328618264740381
Nkx6-1	M2	yellow	0.00233473660621087	0.185208648988669	-0.00618050075568325	-0.0916082539743704	-0.0110152370271849	-0.160426822360943
Ier5	M1	green	0.573858693427897	0.321621636282508	0.102109562161191	-0.0793794051586839	-0.122013758909387	-0.0374510683345565
Fndc5	grey	grey	0.0387936229655276	0.0352344614857621	0.0134748631364042	-0.0456783371516205	-0.0108785905549394	-0.0205858709433461
Pllp	M3	blue	0.0451838841787758	0.076786670110402	0.0925679961561248	-0.0169419524999549	-0.0338485129834646	0.0214410022953407
Sftpc	M5	brown	0.0456011658879273	-0.0122325221011825	-0.0544919810453376	-0.0382218038608744	-0.00443161769414549	0.117242050032694
Thsd7a	M2	yellow	-0.00189384361426993	0.197947462271399	0.0281302944973637	-0.0733891806341509	-0.0621419518220577	-0.157010691797029
Rnf152	grey	grey	0.0688737476632447	0.09590803361466	0.0806782417143572	-0.0509931346468208	-0.111763746752986	-0.0629887829863475
Ephx2	grey	grey	-0.0170846921820334	0.0456506258854614	0.0207392701055183	-0.0318113128111598	-0.0661038990236877	-0.0221328530903298
Duoxa1	M2	yellow	-0.0111200665206295	0.108744805730997	0.0256119429667493	-0.0860999231286842	-0.0196509893160153	-0.0923546413853972
Pcdhgb2	M5	brown	-0.0240847021138054	-0.0185296402609145	-0.0349236032077063	-0.0067307941581918	0.0263190828313455	0.0269318708778754
Dnmt3l	grey	grey	0.00958802619929401	0.0153107586086506	0.012945499242485	-0.0653986404632029	-0.0117502875451001	-0.0152827709771066
C430049B03Rik	M3	blue	-0.00866454683307997	0.0631391421448055	0.0605339182197769	-0.0331490756748127	-0.00766056888395087	-0.0131146888792203
1600014C10Rik	grey	grey	0.0354184840642246	0.0449861074120716	-0.00280477934268634	-0.049236228660549	-0.015100162349594	-0.0439371048011275
Pmaip1	M3	blue	0.0280344012241126	0.0770660918682512	0.0496971017597203	-0.010459164556203	-0.0504207818451263	0.00407605296637547
Map3k8	grey	grey	0.188827738092708	0.20662781720213	0.087361313854716	-0.0752662699987199	-0.0685394115793116	-0.120806926160294
Fcer1g	M3	blue	-0.0212985504705699	0.0179403162865369	0.0516560350125935	-0.0351251367911586	-0.0069675148940827	0.00261223856075147
Ccne2	grey	grey	-0.0320465369890313	0.0446959305089616	-0.00442496831097352	-0.0246346107926963	0.00289216352242265	-0.0287970115753437
Mblac2	grey	grey	-0.00166646143745543	0.000458031105338059	-0.0402721550489569	-0.055420182124556	-0.00992217868830723	0.0416895961115006
Spem1	M1	green	0.0284349690694468	0.00151190383379088	0.00276433744910261	0.00319670978001766	-0.0185748988342796	0.00791546450611035
Zfp622	M1	green	0.277152068218882	0.206520678598919	0.0394832278074749	-0.0692655383698489	-0.0978136023567201	-0.0606014004800461
Ccn1	M5	brown	0.271218335975214	0.0175642649849655	-0.0580831963571855	-0.0553773823517523	0.0363790516901828	0.205124705376211
Ccl21a	M2	yellow	0.0314711182077867	0.0444422750051398	-0.00528111391701235	-0.0641080587716941	-0.0603176239923526	-0.0108732149036535
9930111J21Rik2	grey	grey	0.0239634699875306	0.129582964194445	0.0321278624484208	-0.0420037136306778	-0.0635818701605024	-0.0752580534970177
Cx3cl1	M2	yellow	-0.0130739547582046	0.122736561018379	0.0783330521731518	-0.0392827868343185	-0.0300034848165039	-0.134231445468518
Gm26802	M5	brown	0.153103374972272	-0.128508571764009	-0.11047668462342	0.0783460068245795	0.108384749160145	0.234083763300506
Cystm1	M3	blue	-0.0267165650176984	0.0687237260734165	0.109129563372923	-0.22241641197778	-0.0255229870506062	0.0473712488558946
Runx1	grey	grey	0.190109772723644	0.237214315874861	0.144166335533955	-0.0623435880444292	-0.211732326841355	-0.183385475050153
Sema3g	M3	blue	0.028034443489383	0.0571669034145697	0.118706897722903	-0.00959378711521434	-0.0152009504424116	0.034566108573502
Vsig8	grey	grey	0.035138387206604	0.100499829728171	0.0402082860600579	-0.0326403213732091	-0.0338810548176621	-0.0772430441055516
Hoxd8	grey	grey	-0.0114023094093083	0.0397488847757908	-0.031756370351552	-0.0682077681045234	-0.0571331657895443	-0.0460108989778724
Corin	grey	grey	0.00460643354375302	0.0398464478810169	0.0152336536307244	-0.0362410123808642	-0.0507794681944583	-0.0379424013605838
4930404H11Rik	grey	grey	-0.0149782395372468	0.0878265594133652	0.0141105020298998	-0.00672135823081219	0.00296805638773617	-0.0767249475029656
Ece2	grey	grey	-0.011256257390648	0.00932280735832128	0.0107133010226426	0.00511903301436588	-0.00275510271579403	0.0181277311772192
Clec14a	M3	blue	0.0299360944646473	0.0571090095293208	0.0662397988048577	-0.0248299285665307	-0.0418238310033039	0.0773638085818954
Anxa8	M2	yellow	-0.04228902575605	0.0615386851650048	-0.00485495442883928	-0.0534884043839943	-0.0103281130803451	-0.0539984433330626
Gm9856	grey	grey	0.00830148750715808	0.00256745845516685	0.0419341690068939	-0.00204039156053862	0.0309541509960975	0.0342396625305053
Ngfr	M2	yellow	0.0624767174566277	0.0454616683419046	0.00519968075744782	-0.0256250443726067	-0.00325271211245714	-0.0609707322038772
4930453N24Rik	grey	grey	0.0580648720073666	0.0860523428782316	0.0448366321166791	-0.0355484733762354	0.00653752112625901	-0.0273900369781396
Pdlim1	M3	blue	0.0866653604737495	0.24494978295893	0.124364010152901	-0.134667803265493	-0.13534875196224	-0.135868579840368
Eef1a1	grey	grey	0.27257784297532	0.661721333233962	0.292842933019431	-0.273274676419927	-0.286587801962262	-0.293698635148696
Abca8b	grey	grey	-0.0326981735209193	0.170482064854112	0.037268073207825	-0.0994869407747668	-0.0185425395188849	-0.129503207920147
Sash1	grey	grey	0.164974570543949	0.243724747733399	0.0457228499352751	-0.102949005473323	-0.067472242063467	-0.132297238965198
Hmgcs2	M4	turquoise	0.0483342929067687	0.203251872700199	0.160613227229261	-0.0832597393576202	-0.108557393421998	-0.174315641943098
Peg3	grey	grey	0.0243335487310075	0.129820521591176	0.121542618182099	0.00429765609179752	-0.0840169003721774	-0.127834900590471
Flrt2	M4	turquoise	0.0408589962018274	0.255843386432872	0.142546074907568	-0.0586423681099053	-0.104507233441714	-0.233501743726417
Has2	grey	grey	0.0829150852720665	0.207522022860568	0.0330168193663517	-0.0696459411941913	-0.0483772131246868	-0.172008353428295
Stk17b	grey	grey	0.0685193540558795	0.187441677559519	0.0581820271964795	-0.0355998874970883	-0.109019679175075	-0.119949498862375
Col27a1	grey	grey	0.103872849000392	0.169667671738385	0.0121736290811597	-0.0182179266627615	-0.144405059425134	-0.11200910966986
Fbln5	grey	grey	-0.0389379507606222	0.0644079034855188	-0.0786396134262169	-0.0799121834152888	0.0944233085577284	0.049909400375821
Irf7	grey	grey	0.0183345863348642	0.101949518171273	0.014539891028769	-0.0137393404035287	-0.00524941230308601	-0.0636903053917428
Ednrb	M3	blue	0.131251210760919	0.147225558367916	0.136786207973192	-0.0993809680764982	-0.207019499177124	-0.0916277787162352
Ntrk3	M4	turquoise	0.0507790918983292	0.173729824735733	0.187515615750736	-0.0425285075875786	-0.120416642890259	-0.180035971459656
Naalad2	M4	turquoise	0.0018414181681196	0.232153218766508	0.0778575544098212	-0.0713756637405904	-0.0738998938450212	-0.201315570365771
Npr3	M3	blue	0.0222922277070627	0.00406520784477474	0.0645098741805454	-0.0512070251078469	-0.0209160643973817	0.0898851482847898
Efna5	M4	turquoise	0.0494081827609735	0.14700731144304	0.0273669442566402	-0.0485544872266726	-0.00301703208900757	-0.122332834171994
Rgmb	grey	grey	-0.00945754717386254	0.148492734490969	-0.00171836685715723	-0.0295412994807328	0.0185362232000454	-0.11271510261257
Ncam1	grey	grey	0.0462486568460467	0.137208832085414	0.0333612380965787	-0.0690120461342239	-0.104850249448204	-0.119924909844869
Rgs5	grey	grey	0.0439000366563045	0.0550862151280573	0.0104893092792847	-0.00633645548087462	-0.0862539794065995	-0.0335312704501996
Casc1	grey	grey	0.0579463128352395	0.0202447268822772	-0.0251925000288465	-0.00943836293039189	-0.00771751446108421	0.00293302318691929
2200002D01Rik	M3	blue	-0.0397844930229806	0.0209666207572542	0.0398687090815192	-0.0151723475801324	-0.0537686606516357	0.0239965358186663
Hhipl1	M4	turquoise	0.0344449047054621	0.148579918687938	0.0456925038198776	-0.0723788954840274	-0.00671905766291392	-0.120507959843187
Ctsh	M4	turquoise	-0.015660659291904	0.305552862864944	0.0614439504022796	-0.129428535389427	-0.0525761358055881	-0.28852346004108
Etv3	grey	grey	0.069094563532728	0.0633923238615681	0.0771350611506709	-0.0786855545002241	0.00782008193334583	0.0238096247944744
Eid3	grey	grey	0.147579368376512	0.119628263085399	0.0519991467703561	-0.0019121535694161	-0.0263705145361809	-0.0851639263522708
Prnp	M4	turquoise	0.0113805179120029	0.408133709160482	0.187983617934957	-0.166015390693362	-0.173889199148757	-0.346278661323774
a	M2	yellow	-0.0327968949436243	0.0511807161571402	-0.0055955813536239	-0.0375886932058029	-0.00718832995240323	-0.0578918903437934
Ntng1	grey	grey	-0.0335550681491551	0.0417127087599604	0.0268175459835286	-0.000524687853556523	-0.0447828905230264	-0.043259424789252
Upk3b	grey	grey	0.0362295573253584	0.0370160451516401	0.0517241915103472	-0.0392837886054175	-0.0476841846723227	-0.0122254770200762
Gpm6a	M3	blue	-0.0407697154583554	0.015514246713818	0.0258827865127593	-0.00324134118171583	-0.0412122686296439	-0.0166159217128202
Gm43445	M5	brown	0.0336843934624057	-0.0174360203203092	-0.0310696662493213	-0.0247702915371657	0.00810133483064999	0.0219653590185867
2900026A02Rik	M4	turquoise	0.0454065107229263	0.204317648496181	0.122270635029471	-0.050264859925983	-0.0936176161601704	-0.154540543431117
Gm15958	M5	brown	-0.0268089297083379	-0.0704552857901159	-0.0476443455193629	-0.0326879462991768	0.0615542135571226	0.0652077107987724
Gm17455	grey	grey	-0.0587332586779358	0.113785907928303	0.051265062872369	0.0320884789062688	-0.0257232051541113	-0.128012199097054
Fez1	M4	turquoise	-0.0126755370964375	0.22264938114673	0.0466044419675071	-0.0530413719731486	-0.0274242029953902	-0.181194949085864
Socs1	grey	grey	0.131039679048415	0.184716360344172	0.0143025050268997	-0.0571221107271507	-0.0780789372958829	-0.114831660763103
Sv2c	M4	turquoise	0.020930180177105	0.15155332423368	0.0503506903109306	-0.0047991880520946	-0.102280891505671	-0.139030096646774
Rhoj	grey	grey	0.0750564438438263	0.2954643658786	-0.00380113322027768	-0.132798139173441	-0.0576876714242679	-0.15958998846352
Pla2g4a	M4	turquoise	0.00918125271457163	0.283916949988462	0.069415022889857	-0.110430350122374	-0.0476271218741856	-0.252624795638595
Csf2rb	M2	yellow	0.00685979890080103	0.0809549503313932	0.00734761794460888	-0.0594390419452395	-0.0545012312849269	-0.0567382430657626
Bend6	M2	yellow	-0.0276550417540139	0.0545580346140979	0.0227139175891664	-0.0241567885288389	-0.0265097292804273	-0.067710002801189
Pantr1	M2	yellow	0.0138121605592409	0.0468952312252615	-0.00431483768336398	-0.0645549645150941	-0.0491572898269339	-0.0367677599336704
A830008E24Rik	grey	grey	0.0350847209329043	0.00899562326667886	0.00869947822342841	0.0428982106601368	-0.0510062411547704	-0.0313859407179111
Prkcq	grey	grey	0.00337587969251539	0.0509987889636615	0.0309487305949255	-0.0502109132185716	-0.0840575843694194	-0.0456312691876639
Olfr1029	M5	brown	-0.0203217520496919	-0.0125007140769651	-0.00754973605597866	0.00657880778914895	0.0343335263770476	0.0392221211033668
Cdh22	grey	grey	0.0458509832860845	0.0794698928691612	-0.0281253017905768	-0.00701338675190675	-0.0274979450219177	-0.0522322889150318
Agtr1b	grey	grey	-0.00218433269698058	0.034502375409551	0.00602976447592245	0.027548913272095	-0.0378044507162898	-0.033780499747755
Mlf1	grey	grey	0.0536871612942267	-0.000359334188711176	0.0208266022679784	0.0145394941815119	-0.0206685307235682	-0.0426820908847447
Tmem154	grey	grey	0.00474014664177508	0.0220076487328351	0.0460104946178117	-0.0366726913178445	-0.0410320956750773	-0.0278446263446839
Gm43920	grey	grey	0.0131794822271787	-0.00361406799030652	0.00968554486111065	-0.0225919426160547	0.0216630697277091	0.0106260254718494
Rab38	grey	grey	0.00890895080183578	0.0464204344923955	0.0422551336874212	-0.0260586617258797	-0.087670325890119	-0.0192518814561941
Spsb4	M2	yellow	-0.0196837620995899	0.0610764853246587	-0.00569016993626424	-0.0168434271102218	0.00255928193423307	-0.0601276872750168
Gm47113	M3	blue	0.0144831789547539	0.0456138469390093	0.00693297013075928	-0.0133464662876547	0.00248870406135003	-0.00796969201817524
Gm47761	grey	grey	0.0133284895694203	0.0507814654287235	-0.012247821973986	0.0115162991067582	-0.039795325705118	-0.0353804431829139
Mfsd4b5	M3	blue	0.0160797494244995	-0.0171513142103291	-0.00766891470551804	-0.0340553317311155	0.0109323372174306	0.0474235330640682
Adcy1	M3	blue	0.0320227589632563	0.0452629110510326	0.0115289393028529	-0.0522045706901061	-0.0153664841193808	-0.0276323396559201
Clhc1	M3	blue	0.00433963444043571	-0.00773077670847459	0.0378862952409317	-0.00413780019209545	0.00161594666744962	0.0133333546274933
2310058D17Rik	M5	brown	0.055607782729539	-0.012269636854673	-0.00745706143150552	0.0385279162778133	0.0468264811027872	0.0288156621009926
Mycbpap	grey	grey	0.0339767670005678	-0.018798117289874	-0.000898906830504382	0.0408089014335744	0.00670532755691539	0.0393040038226185
Tmem30b	grey	grey	0.0207021660831269	0.0788562293506568	-0.00372283716001852	-0.066435344831362	-0.0531259501961395	-0.0583553276445935
Stmnd1	M2	yellow	0.0287769294754638	0.0649291280081173	-0.00406318541825167	-0.0180935642089076	-0.0250386631564246	-0.0429871204109421
Rnf144b	M3	blue	0.0595832133185335	0.0610466099251341	0.0862549253305036	-0.0259876762923011	-0.0869005231003478	-0.0446853610390124
Pitx1	grey	grey	0.00827523403022896	0.0689361513308257	-0.00463869374912517	-0.0122112902637835	-0.0262301540209822	-0.0438224338154343
Myh7	M3	blue	0.00897197029520627	-0.00364487352735731	-0.0207674104168388	-0.0887432019948272	0.0137062624980591	0.0365699107228881
Zfp957	M1	green	0.0344674094963465	0.0312730606140517	0.0358763060316295	0.0161090218850831	-0.0286925585174159	-0.00411553685105881
Gm31462	M3	blue	0.000521913133224803	-0.0138395202538597	-0.0487343458168912	-0.0671187705795438	0.0188039202913181	0.0312439753781832
H2-Eb1	grey	grey	0.0343147396387416	0.0691994855915079	-0.00948355511943071	-0.0662998555864508	-0.00627324701429017	-0.0333926712181181
Agtr2	M2	yellow	-0.00394344983476897	0.0684369549205906	0.022708692923654	-0.00236767285459421	0.00255928193423307	-0.0582610230424948
Il13ra2	M5	brown	-0.00183544904225738	0.0015132343542337	-0.010362691224286	-0.0416150037524565	-0.00794192985232336	0.0350030811515352
Ribc1	grey	grey	0.0281144638904827	0.0208700455169713	0.00802004844021439	-0.010700913773477	0.0110859830334197	-0.00037995880729243
Hoxd4	M2	yellow	-0.0204438190890913	0.029741310817802	-0.0122391202626335	-0.0262943449407877	-0.0317903105984992	-0.0369907980929416
Atp8b4	M1	green	0.0277122163924826	-0.0103226474527284	-0.0360682227705511	0.0230823212491971	-0.040406171404368	0.0401806276349353
Fam167b	M3	blue	0.0129356058948092	0.00343367855478528	0.0548355550076352	-0.00866277998402319	0.00941512834787513	0.0262986676405904
Slc2a5	grey	grey	0.0133985152317818	-0.0245618848846367	-0.0188649158695979	0.00734567603630482	0.0250781786815637	0.0476892999632885
Gm42903	grey	grey	-0.00893215865591369	-0.00292708974349842	-0.00914712711617824	0.015398934865237	-0.00491471645917252	0.020211662080615
Trbc1	grey	grey	-0.00174468783523604	0.0602719510415079	0.0231967639217885	-0.0693637840818004	-0.0497717713907172	-0.0286749001703378
Gm26728	grey	grey	0.0501044908844253	0.0619812237368452	0.0514602767791631	-0.0500257986178628	-0.0446237177160642	-0.0608193145453442
Styk1	grey	grey	0.0490996917198013	0.00920521326642834	0.00511870859175296	-0.00518236054401668	0.0280694222052132	0.0102493727454635
Hcst	grey	grey	0.0100585022169236	0.0532360189255506	0.0273913783116719	-0.0656255708511038	-0.0170734024466535	-0.0147566256889601
Smim31	M3	blue	-0.0249742408776581	-0.00601466526425099	0.0204465830914539	-0.0402170264454151	-0.00664094488883935	0.0479593701428332
Dnaaf4	grey	grey	0.0099972527287789	0.0358623331091556	-0.003053305396242	-0.0294677149530189	-0.000716408866857571	-0.0238685819181327
Kcnip1	grey	grey	-0.0416359868242266	0.0690158928705641	0.012930012879903	-0.00813027891394946	-0.0177483952824201	-0.0622822871516417
Doc2g	M3	blue	-0.0437728382144363	-0.00114738778160928	-0.0136599866507184	0.00383529202843978	0.00576209572530773	-0.00612019028334071
Zfp300	M3	blue	-0.0102305636588163	0.00945521664899008	0.04140682459877	-0.0586343751247504	-0.0346057940072662	-0.00155390336768813
Sox18	M3	blue	0.0527926860221002	0.0631536169498836	0.0269041717167471	-0.0124984464120894	-0.048987268180726	0.0100579668716404
Klk8	M3	blue	0.0023595815930725	0.0588898442034975	0.0502552362150521	-0.0212631956703525	-0.0750925280132903	-0.00812755157999542
Nfkbiz	M1	green	0.450490766636422	0.284868227761506	0.0589536626944095	-0.129175076287874	-0.0812052724852232	-0.0508738911035953
Thbs3	M4	turquoise	-0.0261862687485421	0.328475653638481	0.119957456582222	-0.0565531243418279	-0.0899649165805559	-0.30599337106232
Hist1h2bc	M3	blue	0.0546470973228537	0.0439903727841026	0.0163606299580606	-0.109090208215419	0.011199639205362	0.109373318177766
Smad6	M3	blue	0.0761650711780826	0.143059872300772	0.0741110092076703	-0.066987045064203	-0.0629951855097083	-0.0145615677357193
Itga2b	M3	blue	0.0126788201024703	0.0672395703747361	0.0288750584279878	-0.0602790971324875	-0.055964056286122	-0.0138115041109248
D1Ertd622e	M1	green	0.130225437774273	0.120910372754653	0.0161507040882385	-0.0172668258012254	-0.0379383620033637	-0.0543037136282245
Ahr	M3	blue	0.0055025260459259	0.104220313724508	0.0922699621506133	-0.0504999372507198	-0.0816594970312642	-0.0443454672744336
Tmem178	M5	brown	0.0288001102723616	-0.0429285105707092	-0.0165846909143606	-0.0311086966786885	0.055880798731919	0.0751642553839124
Galnt18	M3	blue	0.0537419182600296	0.142445992934423	0.0883683669048944	-0.0643496136287417	-0.0636094868352756	-0.0267437481238347
Gm49708	M5	brown	0.0565205117649948	-0.0235591247756577	-0.0550852264362896	-0.0077775028519104	0.0349447519326977	0.093636101648996
Slco3a1	M4	turquoise	-0.00627514285257492	0.260290530714796	0.111905446103118	-0.114018466046149	-0.089141126953433	-0.206562386030535
Kcnk2	grey	grey	0.0188186898812464	0.112611198234819	-0.00101124954560104	0.0214777262830495	-0.0960225971669612	-0.072132669427914
Fzd2	M4	turquoise	-0.0838063541968961	0.267123985263934	0.163191560610104	-0.0404701106052357	-0.160822865688905	-0.250697410550186
Gm17092	M5	brown	0.0435665777542017	-0.0607887938022414	-0.0569600694374328	0.0218654452563781	0.0468295234371631	0.0792246347493057
Adgrd1	M4	turquoise	-0.0245781488892036	0.248930581509899	0.0613121468077396	-0.0674795833498266	-0.0172932139270712	-0.236403307688822
Parp1	grey	grey	-0.0196570361268646	0.0800550491952029	0.0687699883139216	-0.134484522243904	-0.00383156766914567	-0.0220832860382803
Aox3	M4	turquoise	-0.0218618345379352	0.197326966359669	0.128471760837987	-0.042968639785593	-0.121756702133826	-0.218231124178554
Cdh1	M3	blue	-0.0246502575982303	0.00892216670606041	0.0203658288533873	-0.0975839547214941	-0.00756777743956373	0.0571323329203105
Chadl	grey	grey	0.0407922876328596	0.107478475956602	0.0324874121128187	-0.0739089407912982	-0.0622020415812196	-0.0660427280291232
Traf3ip3	grey	grey	0.00959039885335895	-0.00960112794436629	-0.0169501500261424	-0.0578989095826385	-0.00476867458446794	0.0480000807559001
Trabd2b	grey	grey	-0.0118803815801238	0.170072230319854	0.0613423354791062	0.0145366266432015	-0.0892654010611781	-0.133611988236598
Ppm1n	M1	green	0.164035864878517	0.0136608135859707	0.0215199283729489	0.00279835726469501	-0.0186621449733876	0.0815533486803941
Myf5	grey	grey	-0.0577250982125741	-0.00249684530034707	0.00675560229937425	0.0107988829706056	-0.0489181945389412	-0.0460228050822942
Gm13073	M1	green	0.0340494397184091	-0.0128555437687375	-0.015815283932484	0.0389375388178532	0.0193540028642373	0.0240164354320877
Fzd9	M2	yellow	0.00955151743175836	0.0559341105763381	0.0169383475729703	-0.0214282373392138	-0.0369160014647176	-0.0128623790988882
Oit3	grey	grey	0.0353666734295853	0.0233952595252015	0.0404698596398508	-0.0197528468645315	-0.0553061002182862	-0.0110939975544342
Soat2	M5	brown	0.0222689471131994	-0.0302295565740852	-0.0449830158372617	0.0314185900380484	0.0176338428056702	0.0437626676171762
Sap30	grey	grey	0.0934117030343123	0.0916710011542049	0.112843538561612	-0.0711784597430129	-0.0590147585321321	-0.0253549841035653
Tnnc2	grey	grey	0.00709477101610464	0.0197701496507385	0.0187408242978865	-0.0254199382996458	-0.0243580975895328	-0.0164230119868402
Gm45767	grey	grey	0.0146555054363881	0.0228556808013617	0.0247719358365078	-0.014759472533441	0.0186024806433299	0.0175591475471486
Mrln	grey	grey	-0.0319271743773923	0.0170002944503497	-0.0302366646825049	0.03080719524967	-0.0139743029231788	-0.0259141995756628
Fbxw10	M1	green	0.0727620168160439	0.0103987301508291	-0.0207721789521366	-0.0263448487313377	0.00348553066540404	0.0319031408612462
Tmem171	grey	grey	0.0195269531906186	0.0877583311438781	-0.00246468111637445	0.0570248219562912	-0.0749396925192353	-0.0632845171133636
Gpatch3	M5	brown	0.0060541838268202	-0.015644259344395	-0.0142564023123985	-0.0620248410675091	0.00270300665544072	0.0170825162210956
Il20rb	grey	grey	0.0561097230681458	0.0876646737718545	0.0111943024303937	-0.0336518596401611	-0.0909349917255366	-0.0688187006010897
Hand2	M2	yellow	-0.00190863428954337	0.0915981455753991	0.0127707769239497	-0.0629237666082039	-0.055892843117295	-0.0795036859605894
Dcbld1	M3	blue	-0.033036920782586	0.0504300785424978	0.0439386568054815	-0.0420366869212685	-0.00585067448452865	-0.0108907418909052
Rassf2	M4	turquoise	-0.0826165221186517	0.0895482139094338	0.0340808719002653	-0.0263714491916994	-0.0191815076439314	-0.106587502060793
Itgb4	M1	green	-0.00418938652109677	-0.00424725522680001	-0.00233924136168901	0.0180137439847213	-0.027942991668425	0.00207987814950321
Lpar4	grey	grey	-0.0161941059642478	0.0303180828644725	0.0386431624682831	-0.00641479981097327	-0.00739130293401905	-0.0119024720383667
H2-Q7	grey	grey	0.160849097358368	0.170933069182937	0.0937097933660008	-0.10830464305876	-0.113217645344161	-0.0764040097281712
Dusp14	M1	green	0.0984248751616467	0.0121185771690357	-0.0446946815651916	-0.0291524588410778	0.0118723887158158	0.0495648543382227
Gm3336	M1	green	0.106399392145477	0.0314201616787491	0.0429141637001459	-0.0181342499416	-0.00405306696932661	0.0619342505899272
Fdps	M5	brown	-0.0605052806433152	0.0758030342984185	0.0186421890757773	-0.000817257317765501	0.0476164678946438	-0.0055406014823278
Cavin3	M4	turquoise	-0.0197021935687061	0.374855586608378	0.0618428540662846	-0.171900995901009	-0.125060760168632	-0.259152521649076
Chd7	M5	brown	0.0102380782272109	-0.0708871998828444	-0.0494555499031351	-0.083129767354428	0.0518759275956549	0.166784998289344
Gli1	grey	grey	0.00214456366368109	0.181975145967363	0.0985369968531553	0.0258418433423079	-0.0908290602713349	-0.172565594414429
Cacna1a	grey	grey	0.000169557162677934	0.0827773402039098	-0.0157497714258475	-0.0508948111841289	0.0122348434381687	-0.0675475987560753
Hist1h2ac	M5	brown	-0.0402313193570749	-0.0585724716993996	-0.0288314592986005	0.0179787796827209	0.0301959748171343	0.0291481264238999
Sat1	M1	green	0.275541208336956	0.254741983248747	0.114982161286823	-0.131593635570943	-0.0352402548133527	-0.0755762716299561
St3gal6	M3	blue	0.0452239019174701	0.0764723636926087	0.112686581763285	-0.0294107292397921	-0.0504580030272799	-0.0101314954823165
Scx	M3	blue	0.0578222251418007	0.118771904400224	0.140246366549836	-0.0737781358897433	-0.169832622825926	-0.0821442637160728
Gstm5	grey	grey	-0.022329222759789	0.194902180074894	0.0397186113619649	-0.132417589784822	-0.0495458523940045	-0.127156948681736
Igf2	M4	turquoise	0.0296784773845657	0.165825593953075	0.199394481304361	-0.0451522696000672	-0.146592676535708	-0.17994076029433
Il17ra	M4	turquoise	0.0865711334218891	0.177567273548421	0.109033429527537	-0.063911824308835	-0.0528349033112623	-0.16978102268311
Eef1b2	grey	grey	0.11926975097098	0.470660166772103	0.176695271933679	-0.190496154867865	-0.168983995478235	-0.242575735663823
Tek	M3	blue	0.00780035400950522	0.193556918734285	0.119969842398316	-0.0859625943679001	-0.0262221135436295	-0.0562128421569806
Ankrd33b	M3	blue	0.119039746677396	0.141202178340279	0.138227578972173	-0.0899221596280468	-0.0638458862877913	-0.0425795340679876
Fgf9	grey	grey	0.0400406446091105	0.135556550939637	0.026842348937083	-0.0733093104505431	-0.0823851006021038	-0.114271531501953
Nr1h4	M4	turquoise	-0.014078651117044	0.0630797551545849	0.0457060992856715	-0.0230891715389266	0.0131370598763916	-0.0683300941935409
Eng	M3	blue	0.114461062057576	0.292163210076167	0.175692511943025	-0.127424907856343	-0.106746467807776	-0.134509967268327
Ncald	M5	brown	0.122230596318936	-0.0095537501090616	-0.0565988163889675	-0.0684057964019265	-0.00127631345987931	0.194381098728259
Wnt5a	M4	turquoise	0.0245284035860032	0.234831175228908	0.13203599779512	-0.0726410328962936	-0.195521945658013	-0.207496282018701
Smpdl3a	M4	turquoise	-0.00515975011977003	0.266271442542181	0.0973584296433499	-0.0989002708047435	-0.0676516020689246	-0.205616255364769
Txnrd1	grey	grey	0.21858033911931	0.26810096503147	0.0734069006043608	-0.0850518449773838	-0.0877488249408481	-0.16291420994594
Tubb2a	grey	grey	0.132893522164862	0.339666105039642	0.105921143204436	-0.0858945209751972	-0.112811791725874	-0.179449387076497
Macf1	M5	brown	-0.0714148292374889	-0.428021622960866	-0.275350943956962	-0.0118444190380023	0.298337452388074	0.62669203204483
Tnfrsf21	grey	grey	0.0070481361710524	0.0765085472900232	-0.0252854459532332	-0.068337747646933	-0.0100389700193633	-0.0424143077395205
Lgi4	grey	grey	0.0142939096837553	0.127435796119511	0.0572444859223174	-0.0596539476372197	-0.0523021565670234	-0.0942337523091388
Hist1h4i	M3	blue	-0.00274200112726021	0.0223774001296134	0.0356697795518801	-0.0742993907908878	-0.0469367691228031	0.0109178109663574
Mmp14	M4	turquoise	-0.0424887276509717	0.235783170451288	0.0636067137318932	-0.0455442298690807	-0.0656041376084456	-0.187533043332938
Rnf122	grey	grey	0.162627640657556	0.199030800526994	0.0645590072617135	-0.10023836512768	-0.14268494129898	-0.140732817875958
Efhc1	grey	grey	0.0114991526192577	0.0239836947271074	3.79745748287669e-05	0.00449709217714801	-0.0220656308093212	-0.0130199717092803
Cxcr4	M4	turquoise	0.0146688609445234	0.094259938014214	0.0670522972330254	-0.0515384967033599	-0.0978584384399737	-0.0810757506717946
Hhat	M3	blue	0.0285260204161954	0.0454087137806722	0.0318201565448869	-0.0352756244527715	-0.0306223274893415	-0.0313751418744411
Wt1	M2	yellow	0.00868713046324566	0.095005654643529	-0.00805664999645007	-0.0472159655018431	-0.00626370207859535	-0.0879143934322259
C530005A16Rik	M3	blue	-0.00833026700472514	-0.0124479739130651	0.0423327477295695	-0.0273945309847972	-0.00400326812046888	0.0170077991700799
Cda	grey	grey	0.0814059208322024	0.0876291259762197	0.0838898231861526	-0.0285316768096964	-0.0941462202562512	-0.0916562403657534
D630033O11Rik	M4	turquoise	-0.00872299846161391	0.106922190436963	0.0321649183729513	-0.0365036857797983	-0.00333129140553276	-0.0874434076630382
Pde1b	grey	grey	-0.023773200078077	0.0788779503243743	0.0209961554670037	-0.0640251339358336	-0.00206330106090448	-0.0740543236173859
Tceal5	grey	grey	-0.00473194717463448	0.0839739840871985	-0.0114514316320431	-0.0478144239631354	-0.0221543219325696	-0.0461948030538109
Alpl	grey	grey	0.0299565904161013	0.136880681087251	0.0881912238491277	-0.0376373758314438	-0.0551347010780476	-0.118577155570504
Scin	M2	yellow	0.0253685949671246	0.122941048698105	-0.00560060101449602	-0.045551709356656	-0.0688655293124062	-0.0977384295003516
Pcdh10	grey	grey	0.054881743745852	0.0923270126344873	0.0356618533609989	-0.0567256459926648	-0.0991199896926965	-0.0606315811384872
Skil	grey	grey	0.31849905578497	0.409933695452349	0.167204588819374	-0.157008487102988	-0.193936717222941	-0.23709728899792
Retreg1	M5	brown	0.0868720574094848	-0.170859658135348	-0.136367180936059	-0.0654905085148027	0.198320233340554	0.33280343807818
N4bp3	M3	blue	0.0565031251895543	0.0775217884607901	0.0846227511844237	-0.0358041333763222	-0.0476755724154169	0.0186236897099411
Capg	M4	turquoise	-0.0747612078441425	0.364166652406749	0.121223071707237	-0.101061625189323	-0.0905097195217591	-0.33074154775032
Kctd16	M3	blue	0.123602556657524	0.118267821828132	0.125303293743339	-0.0337399518733108	-0.198572828699584	-0.125792243052758
Gpc6	M4	turquoise	0.0550949655668368	0.321108423804989	0.102088844855461	-0.131597530516302	-0.100397063866835	-0.289590970009868
Mgst2	M2	yellow	0.00716834845157589	0.0401796150089321	0.000583206614367726	-0.02798684366149	-0.0293911491959765	-0.0348913285511135
Gm34455	M5	brown	-0.0188397176048319	-0.0836761726431907	-0.00295330737065773	-0.00336335729487337	0.0835441092751287	0.133224974073632
Lima1	M4	turquoise	0.106244619536236	0.339669591294087	0.112144739008738	-0.0935039362220212	-0.0997044973513862	-0.247461590706014
G0s2	M5	brown	-0.0189368579583811	-0.356452800958783	-0.229108024017619	-0.036112119099682	0.338108386397618	0.543693756797164
C7	M5	brown	-0.00708678802846529	-0.0848077980741678	-0.102035585269363	-0.0257493568481686	0.022881921250815	0.217770079422004
Spry2	grey	grey	0.160807045809962	0.227731249345994	0.04149225994067	-0.103168290930995	-0.0882184188038389	-0.114798317778424
Itga11	M4	turquoise	0.0528328745785047	0.241181683401168	0.0256192251357662	-0.0909338559990688	-0.0294441070727862	-0.20184039090902
Col4a5	grey	grey	0.0198066405629028	0.235834430199411	0.0931965060563446	-0.0400661973028359	-0.108689529745494	-0.168460313509689
Jpt1	grey	grey	0.140053787582844	0.412364713147276	0.137310489484223	-0.155715024017282	-0.117250341230987	-0.267968848234747
Adh1	grey	grey	0.0125822094254499	0.263187394560516	0.0783169893827562	-0.0467762937345138	-0.0916920123498018	-0.197581552248095
Papss1	grey	grey	0.0285019424752178	0.149280616383519	-0.00768101526757753	-0.0678886695447595	-0.0127759019879818	-0.074603182181279
Gnao1	grey	grey	0.0551575039370086	0.159442894330643	0.00444022882362011	-0.0659021840426792	-0.033061266550596	-0.106161685608523
Rps3a1	grey	grey	0.144579776805738	0.604316040643673	0.2590524113576	-0.263980453653739	-0.234120814426077	-0.314423007438844
Nfil3	M1	green	0.398157315718226	0.307522961848466	0.10168711418551	-0.0913826575003104	-0.136322366583258	-0.136015395893617
Fam102b	grey	grey	0.0871883784916093	0.323470088195902	0.114011919455626	-0.0805659077491847	-0.120947643124588	-0.237462158253582
Rfx1	grey	grey	0.0215078195526035	-0.00895580530628354	-0.0243710615972061	-0.0248965274246243	0.0292963029926423	0.0552958371724235
Nudt4	grey	grey	0.156338741927604	0.263685025241712	0.108748748413873	-0.112707353778991	-0.210092617501114	-0.196751049674119
Bpifb1	M2	yellow	-0.0028604063647197	0.0457505781504057	-0.004155131487485	-0.0327326943519557	-0.0488451198949404	-0.044732917132948
Pcdh7	M4	turquoise	0.0869613434700421	0.310456365606084	0.124459114989725	-0.0691510092497904	-0.165670754098158	-0.257638959626971
Ntrk1	M4	turquoise	0.020026133613197	0.0936542352488775	-0.000694668624482344	-0.0322727575111597	-0.0605713663076364	-0.0899366274817865
Zfp595	grey	grey	-0.0281852713627044	0.0127579202488575	0.0293568947627373	0.000300124231290513	0.0365845115273276	0.014618217995218
Tubb6	grey	grey	0.210210960673376	0.412727084486078	0.105296338571419	-0.112205126367687	-0.151128055790676	-0.289274970849871
Sox11	grey	grey	0.0231633055415319	0.0669165149374696	0.0126080098064154	-0.00596048900670886	-0.0661273375858014	-0.0440652768952594
Clic1	M4	turquoise	0.0443816216154281	0.386304605768079	0.136585760540133	-0.149177181869059	-0.0879333637081641	-0.22940447433551
Cst3	grey	grey	0.0841449807856606	0.147588707623117	0.00226355921410409	-0.130394527950537	-0.116942778204636	0.126760691475006
Fgfrl1	grey	grey	0.0249289745468353	0.120680939608782	0.0114644643070314	-0.0893027753770874	-0.0708872247294988	-0.0806343250979093
Sh3bgrl2	grey	grey	0.0133470915468649	0.0195730905691199	0.0163866422873732	-0.0313538350696197	-0.0147727892119762	0.00822742912785806
Cap2	grey	grey	0.0444741572490109	0.116315535177262	0.043248456596061	-0.0580374022248078	-0.0502395518080359	-0.080959921553332
Zfp385a	M4	turquoise	0.0136758922747964	0.223092391144232	0.0305694326859991	-0.0897103087254639	-0.0360266834099178	-0.211506309073792
Spp1	M2	yellow	0.000386084480472066	0.0419519339885305	0.00280439856102672	-0.00358938441318278	-0.00343206346180135	-0.0120245024314794
Ablim1	M4	turquoise	0.0772487454119302	0.34441076484715	0.166535345707216	-0.146614009137945	-0.107001326167928	-0.24737279832112
Npdc1	M4	turquoise	-0.0290771574081017	0.368703293291045	0.12813746571421	-0.15714552126259	-0.126812291949299	-0.313153012421732
Rhou	grey	grey	0.0808888641948022	0.168900102675574	0.0603868695464629	-0.058726552846987	-0.0573680984265931	-0.175314012800601
Cacna1g	grey	grey	0.0424134489676031	0.206579505931811	0.0849808710638933	-0.0505285865174667	-0.0903735614525866	-0.154921440226895
Ctla2b	M3	blue	0.048450786811614	0.0590934791024824	0.0555622125884199	-0.0356999921189096	-0.0155720006925156	0.0482281594182233
Palmd	M3	blue	0.0384122661445061	0.0916225871769986	0.114493804814024	-0.0155668118161783	-0.0569244280327057	0.0331474415166031
Sult5a1	M4	turquoise	-0.00928792537389686	0.18241272817634	0.118492915421178	0.00255498039440867	-0.0629010098337484	-0.170727729024393
Mid1ip1	M5	brown	0.166010838556678	0.0792281163998358	0.0297173196288442	-0.0869806410315261	-0.0131973393012384	0.049247363066615
Ces2g	grey	grey	-0.00232891485711727	0.128683895121228	0.0956755787981777	0.0210579821048369	-0.049345226369259	-0.112192253777168
Arhgap31	M3	blue	0.0821468572483472	0.120194597436068	0.09020279887741	-0.0558453611014823	-0.0719872201511187	0.00596551598839461
Kitl	M5	brown	0.145623863775944	-0.0326237489261579	-0.0801264989874647	-0.0604057018468234	0.0983731343618286	0.259096231517592
Maged2	grey	grey	0.03584061504007	0.283685137815977	0.0788763020238042	-0.121879191216225	-0.0653765479416563	-0.185112820123382
Prx	M3	blue	0.00714073214095462	0.0532605877010653	0.0835086032422629	-0.0470575425281223	-0.0427591487508853	0.0430490588692491
D030040B21Rik	grey	grey	0.0355380696290313	0.0179050130717428	0.00316205138383088	0.0312729918083463	-0.0462630906385612	0.00330652908915529
Wnt10a	grey	grey	-0.0432354417893427	0.0492841118897701	0.00144571862355688	-0.0167431853183541	-0.0338578429232934	-0.0469210949049369
Gm7967	grey	grey	0.0235597422881914	0.0259105211303864	0.0454755426582088	0.0146038870952553	-0.0475326102279481	-0.0227930206757414
Gpr39	grey	grey	0.0540889868134846	0.0381785973733391	-0.00467315568563154	-0.0235345029585456	-0.00748644929948682	-0.0501555730071962
A430106G13Rik	grey	grey	0.00810344096523949	0.0305563790719275	0.0456098057503462	-0.00847979177560022	-0.0412244431733442	-0.00604270387941664
Gm20631	grey	grey	0.00871568219016837	-0.0346175352504745	0.00221191523340647	-0.00695189346307548	0.0246387267496091	-0.0328752673449915
Brinp2	grey	grey	-0.0115467229163868	-0.0330817206188633	-0.0212339922943302	0.00527771969535334	0.015339696116511	0.0103847226517208
Gm15852	M2	yellow	0.011491966565481	0.0677938608065423	-0.00467315568563154	-0.0530761038582419	0.00210185689637723	-0.0530834852195745
Fcgr3	grey	grey	0.0216952538662215	0.059382935036363	0.0514762589089006	-0.0355190852747627	-0.0417778232317507	-0.0136744070123037
Kcnh1	M3	blue	0.0591280977747301	0.0634651702334745	0.07642344786616	-0.00019933498493596	-0.0653853143418062	-0.0144916405844618
AI182371	grey	grey	-0.0300730906231764	-0.00161338061708344	-0.00199562259869493	-0.0428094491881943	-0.0104892275583443	-0.00449161029457517
Gm14305	grey	grey	-0.0170231342169037	-0.0352258842756237	0.0259910659309489	-0.0563146755688996	0.0439212667752441	0.0122796674419533
Stra6l	grey	grey	-0.0247387177087567	-0.0287475341403833	-0.00830491832528879	-0.0243209321250388	0.0153013896914359	0.0339254919493445
Gm29367	M3	blue	0.00777996895018205	-0.0133543278665955	0.0028341013729033	0.0442413839478675	0.0191346249455908	-0.00459540771448965
Jchain	grey	grey	-0.0182129700072379	-0.0128928860710158	-0.0259188691397244	-0.00882313361238367	-0.0342716842316656	-0.0258597082238412
Mapk10	grey	grey	0.0531245728224885	0.0556105963358961	-0.016456760129962	-0.0245035931156041	0.00223998802773651	-0.0303754273422159
Pole	grey	grey	-0.0456787839369783	-0.0355388857682916	-0.0181964096757275	0.0217930036229851	0.00336678161679263	-0.0200171715619366
Trpv4	grey	grey	0.00785567592474476	0.0545184679575465	0.0229337918930501	-0.0366347188083471	-0.0306902112597898	-0.0496647158585481
Papolb	grey	grey	0.0245125908822528	0.0564627631047752	-0.00950954904889266	-0.0542664836322177	0.00210185689637723	-0.0429060547076104
Asb4	grey	grey	0.0542079629977388	0.0415915791845616	0.0263601272545226	-0.0352534020916449	-0.0252131813356335	-0.0421018390556753
Svopl	grey	grey	0.0161305544434235	0.0475476585196556	0.0120162123781221	-0.0297738121988763	-0.0218058451060225	-0.0468783543014777
A430010J10Rik	M3	blue	-0.00182645288228212	0.00342852895171252	-0.00938160737123804	-0.0719879535306888	-0.000500092228552364	0.00456451740521858
Ctnna2	grey	grey	0.0139693639042288	0.0687299846577251	-0.00467315568563154	0.00780759995982312	0.0015946810075853	-0.0470070841391107
Tmem40	M2	yellow	0.00449804297968856	0.0348285373818966	0.00789193982626584	-0.0780898867324958	0.00925428726355847	-0.0261010780229601
Cblc	grey	grey	-0.0243483509541485	0.0227476455471325	-0.00221475986067076	0.000351112616836828	0.00210185689637723	-0.0524642086517202
Mkrn3	grey	grey	-0.0683825702830912	0.0435527359187651	0.0343663094883254	-0.0132900832315726	-0.0532095537678925	-0.05485449207111
Arnt2	grey	grey	0.0193354606746503	0.066409776903675	0.0475556216806733	-0.00788075450069317	-0.0583029594165093	-0.0345917130648251
H19	grey	grey	-0.010838311496556	0.0505743915276388	-0.00467315568563154	-0.035082418323681	0.000855703886944917	-0.0484397275182532
Clec4g	M3	blue	-0.0345871330737297	0.0287247555897172	0.0566332118962823	-0.00019933498493596	-0.023569114156882	0.0219060834583317
Gm45406	grey	grey	0.0264376069582994	0.0535013976979066	0.0839603019622039	0.00924109355414839	-0.0284284903240274	-0.0470733512330331
4933405L10Rik	M3	blue	0.0269730789021636	-0.00192364707190285	-0.0224625364917883	-0.00330589870269257	0.0163764341212381	0.0348210957727635
Dpep2	M4	turquoise	-0.0420160617901659	0.0279376925663329	0.0402367984037076	-0.0140995019877674	-0.0625979896618295	-0.0508912775637402
5033426O07Rik	grey	grey	0.0121083328148255	0.0222438667569033	-0.0164567601299619	-0.0360787172782989	-0.0372622693516388	-0.0383326186032537
Kcnk1	M2	yellow	0.004470210572445	0.054469705092363	-0.00467315568563154	-0.0411217169198808	-0.0614750559534363	-0.0494178699593837
Kirrel3	grey	grey	0.0542350177233467	0.0666508623669619	-0.00950954904889266	-0.0866244320201163	-0.00681608506057587	-0.0479700525339745
Gm33054	M5	brown	0.00363832475984199	-0.0396083677494094	-0.0400239690186226	0.0345604355336922	0.016017553512488	0.0521815511035382
Ano4	M2	yellow	-0.0110187401631857	0.0648705062039326	-0.00467315568563154	0.0115291232399607	0.00210185689637723	-0.0565436398794219
2310039L15Rik	grey	grey	-0.0502706547363364	-0.0214092777233131	0.00162278144752222	0.0300405097313798	0.0137633408076193	0.0143135057149009
Tespa1	grey	grey	0.0296848881732131	0.064652067424302	0.0316897928192027	-0.0631466278913591	-0.0129420760070769	-0.0120414941695877
1700093K21Rik	grey	grey	-0.0176825440394323	0.0222249138956244	0.0373721451894011	-0.0447101602942201	-0.0505243677574074	-0.022034663163716
Spdl1	M2	yellow	0.0188226623217071	0.0640906285771342	0.00248609182106799	-0.0391353946229149	-0.000816360793438404	-0.0501414834573489
Usp43	M3	blue	0.0217597662398479	0.0342669499280684	0.054106960688702	-0.0662363756308461	-0.0379661041396546	-0.00285864891585774
Rasl10b	M2	yellow	0.050755043319852	0.0398245260437959	-0.00650462238887028	-0.0301875518551801	-0.0432150928364718	-0.0135929162980303
Alkal2	M2	yellow	0.0595093205909445	0.0666745462497725	-0.00467315568563154	-0.0610572217301536	-0.0395536856431249	-0.0433832870621375
Gm47518	M5	brown	-0.0340899799216977	-0.0517049091099786	-0.0400239690186223	-0.0419034289463182	0.0485866899776518	0.0386400495115342
4930474H06Rik	M3	blue	-0.00651263698730933	0.0199892104047123	0.00991044527123883	-0.0232607810330658	-0.0469053356426496	-0.0131101645564512
Gm48780	grey	grey	0.035037925989006	0.0516119266423457	0.0542455281058198	-0.00718125066532629	-0.0482731526121669	-0.0477635042922163
Diaph3	M3	blue	-0.00192961189561471	-0.0176154686656565	-0.0054167325598642	-0.00725261937665893	0.00855724819546609	0.0333849700463608
Rac2	grey	grey	0.0386322925100045	0.0433885081348048	0.0281895885229833	-0.0364143489349733	-0.00450609789296442	0.00790802256207048
Rtl10	grey	grey	-0.0312357555886719	0.052129295040891	0.0349364445736938	0.0122461762605425	-0.00813205667616973	-0.0514195018460378
Gp5	M3	blue	0.0136958773082517	0.0236657359803839	0.00996178760628906	-0.0033395285311869	-0.00826511657464084	0.00748913718953499
Rab44	grey	grey	0.0341411859797208	0.0669024015018457	0.0248906603135838	-0.0452891359896705	-0.0231243330273835	-0.0115977246203176
1010001N08Rik	grey	grey	0.00397491725489714	0.0556057835663377	0.0522160076202135	-0.00970505569721151	-0.0583029594165093	-0.0317513635289272
Stk32a	M2	yellow	-0.0220309551847776	0.0452448731331131	-0.00467315568563154	-0.00998514245466618	0.00197044130575732	-0.0527979024823977
Gm4841	M5	brown	0.0131131209337366	0.0191661345834419	0.0251464175872856	0.0386868557184285	-0.0258812904767348	-0.0138772173065654
Slc6a7	M4	turquoise	0.0246071914050295	0.0583187494206673	0.0750279987826492	0.00407984072186039	0.00210185689637723	-0.0510361776355568
Cd226	grey	grey	0.00956437254188151	-0.000963728068970109	0.0375220298193039	-0.0419516181943644	-0.00532396366955553	0.0148607611876843
Lrrc10b	M5	brown	-0.00728138181325976	-0.0327815831734353	-0.0400239690186224	-0.0699892790559613	0.0388804020597514	0.0326207099308372
Gm35554	M2	yellow	0.002903374783788	0.0659436484970768	-0.00467315568563154	-0.0273660342506084	0.00210185689637723	-0.0508446266577381
Gm26902	M1	green	0.00841021798065917	-0.00511528547754806	-8.7099448243868e-05	0.0156522296081044	0.025097726143835	0.0183943685738157
Gm50339	grey	grey	0.0497749304972343	-0.00843683298874299	-0.0229549870592509	0.0250717886760052	0.0453388574158412	0.026387030014394
Eras	grey	grey	-0.0448200669764696	0.0266386684771261	0.0387554093662138	0.0384540179501663	-0.0586688653345714	-0.0568081086626383
Id4	grey	grey	0.1771929972677	0.192888960064827	0.119162754808597	-0.023547200357022	-0.197690627857281	-0.134067350260227
Cobl	grey	grey	0.000966229660264445	0.108910124969992	0.0370849793957905	-0.083348194203396	-0.101445282996261	-0.0901546501652698
Sfta3-ps	M3	blue	-0.0459141805767734	0.00999753759357116	0.0839360671949054	-0.0702196148341136	-0.0209800932103154	0.0111505056998566
Fhod3	grey	grey	0.0929258237180903	0.10909311521794	0.137350860332762	-0.0446905103464389	-0.17217290400255	-0.0906796523313596
Clcf1	grey	grey	0.0339309064226976	0.125872002637826	0.0520350975842727	-0.0604647404889756	-0.0992844748862781	-0.0848678526143143
Tgfb3	grey	grey	0.0606973817243222	0.263022000775898	0.112594032669118	-0.0482372682111157	-0.102053161131698	-0.218633223127147
Rif1	grey	grey	0.0468760050521445	0.178364741686454	0.0951995879880983	-0.0735983430805586	-0.0563546327328901	-0.122351970395123
Calml4	M4	turquoise	0.00183860548522292	0.245060345414813	0.0753685080967003	-0.0610384267018905	-0.101290310278816	-0.212167209450532
Angptl4	M5	brown	-0.0710203885059299	-0.264718146303621	-0.160021480735598	0.030609234436761	0.213484666511679	0.379118585356836
Fat1	grey	grey	0.0197501838530927	0.158119784125442	0.0674467634586298	-0.082902299549259	-0.0437125905248477	-0.127025303045627
Klhl5	M3	blue	0.0515672061485474	0.0949022457854631	0.108281674929065	-0.0885526204364099	-0.0133886660589842	0.0379504195948032
Rps2	grey	grey	0.322310945264577	0.672021002257864	0.29124425121718	-0.280573094249515	-0.319463415791729	-0.31466688764168
Srxn1	grey	grey	0.0386255590747032	0.145253089900748	0.0359599538006677	-0.066318583169941	-0.0431094636173657	-0.118937860850446
Pde10a	grey	grey	0.0648233039516398	0.197285322373222	0.160891733854747	-0.0154058835173266	-0.198398304153266	-0.192275872663079
Pcsk5	grey	grey	0.151716111017043	0.243908152425648	0.114125226547923	-0.119794223924989	-0.152192652841893	-0.159194073877242
Foxf1	grey	grey	0.12811644111874	0.274308067063594	0.227832551658582	-0.045673773222092	-0.160074453184431	-0.150048941984337
Pcdhb7	M5	brown	-0.0370381632506536	-0.00304870091303215	0.0215686626930568	-0.0338643043126176	-0.00594951766186245	0.0440398576539308
Slc22a15	grey	grey	0.00561499520158984	0.0643278113229688	-0.00340892906676253	-0.0507292295668553	-0.0145262123428375	-0.0669229738926692
Arl4c	grey	grey	0.0594444454524206	0.132383050833908	0.0560966222481824	-0.0658589628685741	-0.0539917484986768	-0.0401260678795958
C1ra	M4	turquoise	-0.0202531914117268	0.33970447523504	0.104296720544545	-0.0510030976107707	-0.089656476481138	-0.283517011332322
Gprc5b	M4	turquoise	0.0281058745778295	0.237529271810891	0.10373661741756	-0.108836953255971	-0.0874050359053449	-0.236114216790677
Foxp2	M2	yellow	0.06020891699854	0.245341730766845	0.0879905002495783	-0.127624272356825	-0.0275701146043405	-0.218134886389705
Pou3f1	grey	grey	0.0845826117586013	0.096102652439504	0.0121413628171514	-0.00938392171451197	-0.0594649238161337	-0.0822949181587483
Il17b	M3	blue	-0.0147890078438661	0.0541015471336056	0.0751735725270826	-0.0417922595769758	-0.0377092469483837	-0.0536755696511696
Tpt1	grey	grey	0.294590216918002	0.688692952332913	0.320891030214644	-0.270397530222393	-0.308012354004213	-0.331578141231837
Rel	grey	grey	0.238001990877604	0.270354586778314	0.118844965149794	-0.0690593113488366	-0.144513120175677	-0.175184429954447
Scgb1a1	M5	brown	0.00303632687552788	0.0390107542889243	0.044243940108474	0.00430714671930349	-0.0493118185538543	-0.00172429802561097
Dact1	M4	turquoise	0.0495853785196171	0.204722806139842	0.0287664982234427	-0.112369725430585	-0.0372900207774836	-0.152225285444023
Galnt16	M2	yellow	0.0488385560230017	0.200171905608678	0.0191662181514776	-0.0642170898009566	-0.0538748417457146	-0.174955594440724
Mtfmt	grey	grey	-0.0294959388940647	-0.0183898767575681	-0.0105967233698584	0.0389837376611392	0.00760923914689996	0.0175518888389012
Vsnl1	M5	brown	-0.00547363107309013	-0.0170040306580576	-0.00195950832469307	-0.0308745998582961	0.0514308486255629	0.0873372347273343
Scn3a	M5	brown	0.0472137115487072	-0.207072069957018	-0.16391387535071	0.0523767822676097	0.128331860796846	0.335768950625595
Agt	M3	blue	0.0995372902349756	0.157443459003836	0.248180866842935	-0.127758849494481	-0.266706833564574	-0.148663361113287
Dusp6	M5	brown	0.171397663958125	0.00281712560441307	-0.0498897798961035	-0.0178779681314353	0.0590343837599206	0.153924166573465
Acer2	M3	blue	0.0649687010441982	0.0729272665333105	0.132524269811772	-0.0581266493267604	-0.0365661046263265	0.0553643325383413
Mir100hg	grey	grey	0.119934789567819	0.164831697482105	0.0660163707333478	-0.0258319824240393	-0.0491036765854765	-0.0985376728719955
Mark1	M4	turquoise	0.0454972068872399	0.183887424070629	0.204644862478163	-0.0771634877464962	-0.192993484720784	-0.191483451337072
Sema6d	grey	grey	0.056706417371453	0.163042720309783	0.0757105030114736	-0.0502575435751626	-0.0547795637347613	-0.142992848314611
Acp5	M4	turquoise	0.0206187298869089	0.175402305607566	0.105567112668807	-0.0213038686105543	-0.0261050470236212	-0.156444412487587
Ccdc112	grey	grey	-0.00357005193589687	0.0264162872106395	0.0325757685886914	0.0380034062416864	-0.00200571006630835	-0.0402557457608321
Caprin2	grey	grey	0.0268364658486263	0.0261014041331641	-0.0391254618321856	-0.0185703883987058	0.00236838869008075	0.0378689189541857
Osgin1	M5	brown	0.108360247485429	0.0520725608578062	0.0211178706439992	-0.0341980891430433	0.0162105433433908	0.0143505260434086
Col4a1	grey	grey	0.141731875082433	0.380185563573995	0.143131478974451	-0.109125043346796	-0.158090205286151	-0.17043197734683
Styx	M1	green	0.109357233191812	0.0582064023112181	0.00259226149387347	-0.0133764763450189	-0.0343481108189032	0.0144344752423952
Cul9	M5	brown	0.0344434590826842	-0.00396252482863119	-0.0269967574877735	-0.0184465672198792	0.000530764453003892	0.0687700042556175
Net1	M3	blue	0.0949328505016014	0.121147654599843	0.0921573553512532	-0.136313958744209	-0.207685752164756	-0.0895699498895321
Nfkb1	grey	grey	0.231395615789887	0.35069824797704	0.143013890860567	-0.0939812039868495	-0.150769959555643	-0.233206918790578
Abi3bp	M4	turquoise	-0.0232349541980479	0.309274204460261	0.0932839896127805	-0.0991451342869961	-0.105020319922539	-0.212668761658182
Dok5	M4	turquoise	0.0103765433867449	0.0959532632546376	0.0193076298562976	-0.0630164445366054	-0.00601258728535202	-0.0854146557351493
Dennd2d	M1	green	0.0386770611170106	-0.0109499801101051	-0.0185556161980938	0.0308728296017547	-0.030323450416863	0.0326966737894554
Map10	M1	green	0.0421745422786949	-0.0234565479831986	-0.0364514706902595	0.0183162939947447	0.0458738814429612	0.0336072768014829
H2-DMb1	M3	blue	-0.0136140942263317	0.0312893392292327	0.0620356823917058	-0.00688471413063036	-0.0153166128490169	0.0137516298270648
Gm49970	grey	grey	0.0128005564903652	0.0239817339164987	0.0457398268147576	0.00422194605155427	-0.0124205394037273	-0.0113146076210264
Fmo1	grey	grey	0.0275280631684296	0.201741801668369	0.103671506282062	-0.0551505232523057	-0.127885684611805	-0.0949524340572783
Ecm2	M4	turquoise	0.0595577027873893	0.325083799863822	0.166771732090185	-0.163592558576039	-0.180213787410043	-0.275152578924551
Nrarp	grey	grey	0.0777254043528195	0.0978322786541844	0.0148546655092611	-0.0222893979808972	-0.0722992315567629	-0.0292786188521883
Sap30bpos	M1	green	0.0318879481998893	0.0550037380231159	0.0308742490199558	0.0253569468891766	-0.0345467657028766	-0.0252206572032244
4921504A21Rik	grey	grey	-0.0143425959578891	0.0721892005583207	0.0440442549279152	-0.0187488700470075	-0.069826580512602	-0.0359883406863959
B4galt5	grey	grey	0.0569160386482341	0.197801155179112	0.0869494574927486	-0.10828841018336	-0.0966241460914498	-0.155894026312775
Grap	M3	blue	0.0128926298421867	0.0711304680402648	0.125971598992253	-0.063820928370863	-0.0038097308606463	0.0820253368546837
Mfng	M3	blue	0.0120903058571525	0.0607028535093587	0.0869752637562134	-0.018551635357104	0.00351141636183533	0.0339286464233713
Gm41764	grey	grey	0.00274263929170246	0.106952706181673	0.0145935201272323	0.00461698880779019	-0.0712898780142625	-0.0941096193140305
Osr2	M4	turquoise	0.0310050112405195	0.219765426125289	0.0284600813112024	-0.0395371676877859	-0.0564733223746836	-0.182688154025089
Spns2	M3	blue	0.06071568090373	0.0924278327366311	0.0717311825853565	-0.0524536994446459	-0.0428753466253424	-0.032499714417805
Clmn	grey	grey	0.0273792330267994	0.1237665650769	0.0430876137226177	-0.0299430729107743	-0.0810378212556838	-0.101642039005948
Uchl1	M2	yellow	-0.0135035045952132	0.117978394401153	0.0439474241914383	-0.102853575174222	-0.0157380051961224	-0.080525243579917
Cyp2b10	M3	blue	-0.00847332396205101	0.00362166275211576	0.0409273953562002	-0.110716844334405	0.000802632902230698	0.0543793436739323
Serping1	M4	turquoise	-0.00589267092295969	0.237269031932179	-0.00881137258102246	-0.113431455992649	-0.0250838526448746	0.00905969846508037
Chchd10	M5	brown	0.0406832423471913	-0.000534259099047374	0.025171586003357	-0.0121312651446018	0.0153655421966491	0.105793398295222
Jcad	M3	blue	-0.0573710432948557	0.14955907361249	0.130160595841604	-0.132524677722829	-0.0344103955695611	-0.0465724043184004
Hoxaas2	M5	brown	0.0252298094066747	-0.00667617321699461	-0.0317089248265317	-0.0304388027406258	0.0232172187673408	0.0592129416084474
Cntn4	grey	grey	-0.000487086700796629	0.203839732678011	0.109326157278862	0.0308921366461293	-0.164754714177546	-0.155310253277346
Nav3	grey	grey	0.0825259850699599	0.136149326779743	0.0417869855556197	-0.0254692736545938	-0.0904188160659508	-0.0828465013626708
Ppp1r16b	M3	blue	0.0311754657382607	0.0619265509847221	0.0578691116638959	-0.0151032420314652	-0.018841205967965	0.0497458547642961
Fndc7	M3	blue	0.064166453108763	0.00673679296695723	-0.0371899651575109	0.00668633213641236	-0.00723777016346506	0.0433348428177504
Ar	grey	grey	-0.0122690163413536	0.188189148768169	0.0355646045651471	-0.0498958802751096	-0.0747448061937283	-0.17784321474329
Egr1	M1	green	0.746437404605727	0.52101058636732	0.168370165218409	-0.130972754271932	-0.198952266319337	-0.177614698742588
Arhgdib	M4	turquoise	-0.00271189277273534	0.128588398575835	0.0793460990455402	-0.032207509751946	-0.0855908837660102	-0.113971147997629
Rab11fip1	M3	blue	-0.0236892748170686	0.0173053764553292	0.0590914840370422	-0.0670422035262306	-0.02857466703908	0.042326748767892
F11r	M3	blue	-0.012864475600843	0.0632538206965236	0.113309072381267	-0.0707290025711605	-0.0898999068049498	-0.0126190313891256
Slc11a1	M4	turquoise	-0.0318720199351294	0.0703642052638233	0.0223030671601807	-0.00291489093272841	0.00296298255609638	-0.070698421924152
Cds1	M3	blue	0.0143124833956594	0.00794275866109254	-0.0202366766146854	-0.0359643244775347	0.0243164546676777	0.0274896442909244
Zfp850	grey	grey	0.0268466586215443	0.0694941979972818	-0.00764223046232325	-0.0274887288961374	-0.0290738744397174	-0.0366400284789544
Il21r	grey	grey	0.00448874612727805	0.060105156396752	0.00764481256642956	-0.0239467671137065	-0.0578875599376785	-0.0627041428879062
Cdt1	M2	yellow	0.0337718646517861	0.0412976691901828	0.0388576338728009	-0.00882280521064846	-0.0180325656273843	-0.0680235501327612
Fxyd2	M4	turquoise	-0.0278144359347888	0.0790027689040446	0.0275386325227452	-0.00896917252447101	-0.0100445476760214	-0.0650966136267194
Megf11	M5	brown	0.0127064079836746	-0.0236419288427339	-0.0314533092957231	0.00981105443103174	0.0388021960385242	0.0537440295012181
Akap6	grey	grey	0.0327344495885874	0.0183941502472627	0.0701317436289637	0.0152475421073681	-0.0697445205094966	-0.0135160864323674
Gm47405	grey	grey	0.0479614805063917	0.0134049254088411	0.0358527985921776	-0.0821106417919376	-0.0010760249058407	0.0325823167666878
Nxnl2	grey	grey	-0.0168978694883454	0.0472088321237143	0.0191912087842343	-0.0321234092439952	-0.0108792737427228	-0.0259154854885349
Xkr6	grey	grey	-0.0103492213694026	0.0215352378443147	-0.000568958766598017	0.0124928937837214	-0.0639587161599808	-0.00325994315170686
9330188P03Rik	grey	grey	0.0359856978127012	0.024017479512092	0.068028767589302	0.00737988598504113	-0.0775458924498135	-0.0459830747866928
A130051J06Rik	grey	grey	0.0393647776188235	0.0143953863878548	-0.0223473977736858	-0.0206327798269162	0.0135235911399317	-0.0228139942066177
Srl	M5	brown	-0.0244986329332279	-0.0397292379680053	-0.046029453212558	-0.00164850391606454	0.0345874076422957	0.03709293299467
Pacrg	grey	grey	-0.0565333128029994	0.0345343084929894	0.0322675868591894	-0.00975187652037382	0.00297261640891099	-0.0438094229475671
Prss30	grey	grey	-0.0519766004226789	0.0624612733338886	0.0233724661905749	-0.00879229301796515	-0.0947097629866679	-0.0651261837583789
Gm49901	grey	grey	0.0741132813067597	0.0621649642240224	0.00952203384944742	-0.0406562161100017	-0.0228387091753132	0.00302644880546249
Dennd1c	M5	brown	0.0221123286575251	-0.0315361177414783	0.00186649434144592	0.0618213235424258	0.0329308461708173	0.02622168766282
4930426D05Rik	M5	brown	-0.0263880280517209	-0.0545130767087686	-0.0443435869415103	0.00669865957237647	0.0449614427162629	0.0418313485095074
Csf1r	grey	grey	-0.0309346175220748	-0.0338753762528428	-0.00250528252870795	-0.00884343289397952	0.0306892472495741	0.0494939900516334
Ptgs2os	grey	grey	0.0517719488161815	0.0754459660339789	-0.00237076860677701	-0.0781890498101249	-0.00705400039477888	-0.0671837468469297
Sele	grey	grey	0.0564491926995592	0.0735875597279675	0.0298813138282193	-0.036728561579091	-0.006887328308033	-0.0638887764613299
Gata3	M3	blue	0.0457660305132886	0.0509568233488522	0.0512302547815573	-0.00395654728442636	-0.0390579683961858	-0.00812760696165111
Knstrn	grey	grey	0.0116432383188825	0.0562085083279877	0.0275474462756882	-0.0777075625094421	-0.00893911570013853	-0.0480528693084859
Hao1	grey	grey	0.0464202628249864	0.0887364609653511	-0.00658773620711987	0.00506527880786761	-0.0132569517599783	-0.0694651339833171
Gm26850	M3	blue	-0.00103863569173788	-0.0392754586078463	-0.0426351716572194	0.00935996804564306	0.0408069555730734	0.0528809634797487
Gjb5	grey	grey	-0.0191848632980718	0.0550188605692391	0.0219291127202421	-0.0162215692099735	-0.0172017892750119	-0.0664460323476246
Parm1	grey	grey	0.0189317752102744	0.0933729172076961	0.0410728572974794	-0.0149099457972779	-0.0536002553644993	-0.0610815210993957
BB365896	M5	brown	-0.0225144799058566	-0.0461416069241174	-0.049747729098206	0.0325244763866549	0.0398636164483427	0.0435773030079191
Smco3	grey	grey	-0.0551504397804746	-0.0231055917181446	-0.0258422293481188	-0.00692080091140069	0.022728997089217	-0.0079214482639885
Gm38405	M1	green	0.0160319728158364	0.0034792972598384	0.047840410001314	-0.0413427207857223	-0.0147109529889125	0.0176460913503009
Parvaos	M1	green	0.0331245455171724	0.0403392843685916	-0.00722342102412261	0.0428713891528531	-0.0422726471213457	-0.0229805867381085
Slc37a2	M5	brown	-0.0105827552226248	-0.0385472896285378	-0.05165355715139	-0.0349966722087797	0.0162754848965479	0.0550992736461637
Traip	grey	grey	0.0355738198500776	0.0145056685624006	-0.0127135331658624	-0.0132780221610168	0.00820668017350931	-0.00962286973553437
Eya4	grey	grey	-0.00565396731896105	0.0728058570353079	-0.0067737350185384	-0.0410021039838635	-0.0596695829016788	-0.0653487230664926
Syt1	M3	blue	0.0779126596851753	0.0776666766219283	0.0885816878436501	-0.0491845237582899	-0.105777248026793	-0.0663187242942775
D130043K22Rik	grey	grey	-0.00748326154903266	0.0348848204300619	0.0373660366641292	0.0131047432913028	-0.0359124207718785	-0.0398100657133519
Gm5464	M5	brown	-0.0198760016033055	-0.0243910651013634	-0.0464549006863031	0.0584918786295641	0.0449033126410986	0.0188036456896972
Cdca2	grey	grey	0.0545798572783066	0.04098682092175	0.00989629119088157	-0.00493405097835519	-0.0256458240147912	-0.0187639597279123
Rtl6	grey	grey	0.0273939524016278	0.0125165016267799	0.0167082489043202	0.0137287426024491	0.000590382916892097	0.0102968070827427
Krt79	grey	grey	-0.016650136966228	0.0748086766507361	0.0204061369805624	-0.0484239555064286	-0.0241621168515493	-0.0503419352056006
Hectd2os	grey	grey	0.00416615432109676	0.0260200414991373	0.0344599592899045	-0.0258717611453186	-0.0505100124496949	-0.0445725919883815
Rtl3	M2	yellow	0.00711830624889542	0.0840552429833425	-0.00658773620711987	-0.0503860046758589	0.00275092880157479	-0.0627277929203518
4933409K07Rik	grey	grey	-0.0109216701638747	-0.0301368771025075	-0.0424091849491449	0.0475048211430225	0.0291930219938945	0.0207328134719338
Slit3	grey	grey	-0.0539340601360657	0.219179961389527	0.0620778767676007	-0.0818331236758796	-0.0118506042824009	-0.14222879368089
Hspg2	M4	turquoise	0.0200255748871932	0.351511763564682	0.078938512365432	-0.126961142013671	-0.0712019496615669	-0.278065154281265
Scn1b	M4	turquoise	0.0419086919913618	0.299252003132142	0.0786195756128271	-0.101687410594378	-0.0513324313285498	-0.233948278850287
Efnb2	M3	blue	0.0856300306103134	0.128715388932655	0.203548837779563	-0.0441697653812299	-0.116386174083069	-0.0418136669001054
Cercam	M4	turquoise	-0.0124107772652371	0.186188066732462	0.0748748770224187	-0.0298780891074898	-0.0363276692873726	-0.153861752645044
Arsj	grey	grey	0.0396023801489663	0.00121738125149652	0.00152869621007164	-0.0100734111163739	0.0267559514601538	-0.00244588539024828
Atp1b2	grey	grey	0.0469541815309613	0.0726961322746788	0.0907441419286832	-0.0242214647075063	-0.119768944922295	-0.0653532322103581
Pcdhb3	grey	grey	0.0458312480517826	0.0442828343023592	0.00354244392785351	-0.022757230991128	-0.0294065791513587	-0.0111278427147737
Apbb1ip	M4	turquoise	0.0452135163501456	0.272738621383526	0.100510458609515	-0.0627340760007949	-0.0453572116472811	-0.247309933122451
Dbi	M3	blue	0.0765554597174533	0.0897900285176219	-0.063184767123588	-0.178800222599641	0.0850961968537724	0.135689285893378
Pla2g7	grey	grey	-0.0134320162967516	0.0442963433474124	-0.00279162282524481	-0.044974726474446	-0.0347606639678554	-0.0230449278011639
C130074G19Rik	M3	blue	-0.0467980369745693	0.0426473729760842	0.0837032922296918	-0.0802865157935648	-0.0109908241423456	0.0494799801469252
Dusp4	M5	brown	0.0228650343353186	-0.0670013111748498	-0.041193074837364	-0.0352050684429198	0.0696590415811102	0.140171075474671
Otulinl	M5	brown	0.0718733123530054	0.0809833352368941	0.00972353930292264	-0.0161170172129898	-0.037023856671732	-0.0473049398485202
Phkg1	M5	brown	-0.0260788635062065	-0.0128579352937959	0.0466145511827118	-0.00345466191546735	-0.0378062838195096	0.00281666810643512
Meis2	grey	grey	0.0390511764797207	0.0958985950707518	-0.094877133506974	-0.0631347558440089	0.0338783190149535	0.00596504020302853
Kctd12	grey	grey	0.118130153639083	0.170067413730276	0.0641242587279786	-0.0545054064200525	-0.0449456655054324	-0.0794169161481611
Smim3	M1	green	0.21708169458606	0.202372893850385	0.0535128537107426	-0.0754255253834193	-0.1532875543218	-0.0748993473922959
Heyl	grey	grey	0.0194372435502663	0.108090172323704	0.00531265570563225	0.0094713957341896	-0.0667712026872936	-0.0380273958479986
B830012L14Rik	M4	turquoise	0.0729114969465085	0.192323681541747	0.0951637034239909	-0.067074397398916	-0.0468574629950547	-0.183071504493907
Myo10	M3	blue	0.0350990386118778	-0.0234377057635852	0.00363923929840211	-0.0798067369445285	0.0689828643378168	0.177506716140125
Tsc22d2	M1	green	0.249938185474374	0.202310877972556	0.0445115643968388	-0.0942632751107817	-0.0558958183811802	-0.0417477255878395
Mn1	M4	turquoise	0.00845119594941334	0.245975219556205	0.0890044552318362	-0.0272687656172871	-0.0966720892307886	-0.23040103915129
Kcne4	M4	turquoise	0.0588610078119021	0.148989117519996	0.118900803585458	-0.00527572949381582	-0.130600330913395	-0.130091002615277
Zfp976	grey	grey	-0.00312211960686667	-0.0309773566778979	-0.0216120097293169	-0.0480924402298093	0.0159236760283478	0.0455970657607415
Idi1	grey	grey	-0.0180204816553013	0.0853210226489367	0.0418317097998709	-0.0169284170767467	-0.0219131032015549	-0.0395617671510555
Cpm	M5	brown	0.0549179467544024	-0.0891506019640144	-0.0849010445176743	-0.0451036224311295	0.0740627709899796	0.225529123596719
Clec2d	M5	brown	-0.100370302450371	0.0149455012642911	0.0661063000568317	-0.0218723427057554	-0.0427234864523994	0.054178448918162
Nfatc4	M4	turquoise	0.0244352523852822	0.228833307710812	0.104097409671369	-0.0417548057839213	-0.123670859016677	-0.21775893429271
Sobp	grey	grey	0.0939105941299741	0.175283005079812	0.0211229456628414	-0.0576234038115177	-0.115554578702406	-0.132923219152609
Dock9	M4	turquoise	0.0217715211962844	0.208480318179004	0.1449464291521	-0.0443721307440293	-0.0843576728341031	-0.160747487761599
Plk4	M5	brown	0.0219985201932505	0.0055360609634642	0.00708400595044383	0.0541827047948718	0.0197410390308833	-0.00060154452290437
Cdh17	M2	yellow	0.114426402560393	0.136453390031677	0.0861888520244226	-0.0595534982522269	-0.103460919440777	-0.114411942121383
Lgr6	grey	grey	0.10892058459124	0.17695979166413	0.213036900129071	-0.11200732984922	-0.255123092284871	-0.152868381300898
Mex3a	M1	green	0.079724582291837	0.0493479749086206	-0.0283510899952289	-0.0749630366367246	-0.0287025345523728	0.0186466769222035
Itga6	M3	blue	0.0233427387657199	0.0612043121352507	0.0398249446852068	-0.0746747519751134	-0.0582976802398897	-0.0174048432739277
Ucp2	M3	blue	0.0664171770672857	0.26312805333395	0.16146967976328	-0.139630903582926	-0.137804009028925	-0.123675957634564
Atf5	grey	grey	-0.00532926444188321	0.171013712698994	-0.0185143045343469	-0.120920944424353	0.0321494667680702	-0.0271698807647835
Dnajb14	M5	brown	0.0117289449045264	0.0295911500951057	0.039775792281644	0.0131120494207833	0.00059465700417781	0.0620806068620806
Igsf3	grey	grey	0.0763655809498778	0.220891362738886	0.0470002215225771	-0.04788940915771	-0.10354985944755	-0.185649391777436
Csf2ra	grey	grey	-0.0110445141366442	0.104877801732225	0.0429559489044019	-0.0496415325374534	-0.0318020741514254	-0.0775997880678741
Slc5a3	M5	brown	0.14950080801686	0.0310507309775342	-0.0238402589630347	-0.0120319366353331	0.00228961194825777	0.0872641546487074
Fosl1	grey	grey	0.132277012633664	0.176697249107695	0.00247880154030281	-0.102317778479919	-0.0523007186535394	-0.138305659406995
Myh9	M3	blue	0.0599158450076075	0.250927329848531	0.150930194094118	-0.159405783847185	-0.159875521489844	-0.115627278624186
Fhl2	M4	turquoise	0.0636570706354822	0.196099220370703	0.0531671239304406	-0.0358188244424935	-0.0880000415025731	-0.196202602289395
Nfat5	M1	green	0.279829192059735	0.237101525273999	0.0829527090982921	-0.0540471340645107	-0.0653107061398034	-0.082409274731596
Slc13a4	M5	brown	0.00762681964346908	-0.13394426761275	-0.0844762494248463	-0.0561643233730929	0.129085187038896	0.189044273740819
Ankrd44	M5	brown	0.0448840540845993	-0.12630356525069	-0.100394926012689	-0.00937943078561558	0.108551536882876	0.252312565171892
Rps12	grey	grey	0.167597095812063	0.557890370467475	0.235185332349801	-0.282797506744321	-0.239034234785392	-0.258566802651232
Cenpa	M5	brown	-0.0169581822358466	-0.0584058402681825	-0.0652496288553395	-0.00338099248180298	0.0422416332457105	0.133750124408894
Npy1r	grey	grey	0.0226535618988897	0.0265434394107783	-0.00852136556021628	0.00146480813340501	0.0232805534169621	0.0362533972855027
Kcnt2	M4	turquoise	0.0357267563219246	0.212230103318145	0.0577842608348568	-0.0848930470244209	-0.0139042430818318	-0.1776611525459
Ddr2	M4	turquoise	0.00674371678352611	0.243325582495582	0.0778550305336945	-0.10286520856877	-0.0929167154486785	-0.199369276356887
Gm10076	grey	grey	0.21994058039509	0.403625940385828	0.127231392803941	-0.202240231076434	-0.139265874799929	-0.0894280470562641
Abca8a	M4	turquoise	-0.0540298127768934	0.275825075231364	0.0664612307946745	-0.104359666517865	-0.0343857843564595	-0.208133125688421
Zkscan7	grey	grey	-0.0311767936637025	0.0584448353445833	0.0770562785157844	-0.0162120746948325	-0.0109336405971787	-0.0500313340579753
Adora2b	grey	grey	0.0530936099504259	0.130139914317	0.018165168902768	-0.0861084332708433	-0.0322383958246547	-0.0917651833747381
Wee1	M1	green	0.25198479318532	0.16793298638574	0.0163820827479135	-0.0712706001688931	-0.037792478172059	-0.00603888921260813
Fos	M1	green	0.630356630771758	0.207157327407988	-0.0183815353142428	-0.0398975403409672	-0.00106458149341342	0.135160699876733
Rab20	M1	green	0.265193780475504	0.182664409535669	0.0202221370663595	-0.0127217126590605	-0.0632715425818409	-0.0505745250560731
Il1r1	M4	turquoise	0.0352495689628602	0.19693311975932	0.0784338838735757	-0.0427524632292094	-0.105689463590143	-0.160638961955721
Cavin2	M5	brown	0.0259705967516926	-0.0561953962800929	-0.0181003842721058	-0.115462546481904	0.0173783975503664	0.304041333699717
Pi15	M5	brown	0.0200767441626157	0.07932930542693	0.0197181932007839	-0.0251949809672896	-0.0678252641785012	-0.0358338123669323
Zfp608	M5	brown	0.0556792127259151	0.0190254212766869	-0.0467772156692042	0.0159763193370603	0.0272214517129736	0.0238728300333934
Taf4b	M1	green	0.165320481606446	0.125804677404974	0.0202888406795089	-0.0252326370527658	-0.0627648805412051	-0.064001645857733
Fam220a.1	M5	brown	0.0655866578895533	0.0282654959843678	-0.0308627228465875	-0.0201662581188651	0.0216918948072638	0.0219439118785091
Klf5	grey	grey	0.0787289242884207	0.141187316415881	0.0735691339913818	-0.0815983396923049	-0.0315291288717373	-0.0755756353401067
H2-Aa	M3	blue	-0.00487544063176756	0.0676788343545469	0.112388594127549	-0.0822403613725259	-0.064441337783831	0.0264118765494541
Micall1	grey	grey	0.017402780066147	0.0913734075244929	0.0435511555104326	-0.0208010309744779	-0.0359784577337677	-0.0602592093228093
Casp4	grey	grey	0.19512355351715	0.291900124135983	0.0920975926312717	-0.0477134588948152	-0.0710215942622811	-0.169791302159887
Chst1	M3	blue	-0.0327202401195418	0.0181264077082079	0.0136931869563234	-0.0402673962698714	0.0444413198187109	0.0525463096723383
Sema3e	M3	blue	0.0161504643951398	0.0740745850665871	0.0524709301801227	-0.132538336685849	-0.0309012025443203	-0.00904746871685047
Nav2	M5	brown	0.0307424757101433	-0.137317020375897	-0.0691531927282644	-0.0221021593266787	0.0797576330032244	0.17903957200299
Ltbp1	grey	grey	0.0556266142238963	0.170517189215023	0.0313959494391227	-0.0758110307367931	-0.123914550834228	-0.0573715582605269
Loxl1	M4	turquoise	-0.0132874804256571	0.178944688012332	0.011456033787936	-0.0421762529869943	-0.0669401981920849	-0.0231176998686684
Pxdc1	grey	grey	0.0719845249583631	0.255189492193378	0.168577590106939	-0.125159962655383	-0.110913778024147	-0.12045412957662
Fosb	M1	green	0.631951179863376	0.284313647728778	0.0269365766654912	-0.0911541974149021	-0.00258994992594145	0.0356535720425867
Tie1	M3	blue	0.0628039167223561	0.121206720731023	0.123617820166514	-0.0356071815692043	-0.0546668139648411	-0.0327360643311777
Cd24a	M3	blue	0.00748930140277957	0.0590302063240253	0.0510117644226915	-0.0808766251035398	-0.0562521175618329	0.0271980415373671
Bmp6	M3	blue	0.0420352196348873	0.0836279377399758	0.0472757896875498	-0.0343118289849086	0.00371491756554789	0.0614207986975414
Bfar	M5	brown	0.0597397155224903	0.0327370436438612	0.010672641107294	-0.0356094777138703	0.0473485780461574	0.0631531138243271
Bst2	grey	grey	0.0575389099338546	0.245599877517148	0.0985679370305919	-0.0198817408017885	-0.115876260785724	-0.16313267847753
Nrg2	grey	grey	0.0249332580917676	0.0481297846349141	-0.0151070106937075	-0.0116811559796201	0.0415270867700541	0.0167878110693954
Gucy1b1	M5	brown	-0.00378846705886799	-0.102077940185121	-0.0736140262611659	-0.113432894644921	0.10156525711129	0.233898680114781
Ceacam1	M3	blue	0.0529716431012675	0.0565502850764029	0.0696981275149605	-0.0589610261923658	-0.0234027664392626	0.0180461914031749
Rflna	grey	grey	-0.0083253172496008	0.0343476175510487	0.0263879507186701	0.0138233585140534	0.0223703849868903	-0.00374641511364094
Myocd	grey	grey	0.106658697777903	0.0820986997904248	0.145784563970443	-0.0386391482329668	-0.164476298046022	-0.126270188396615
Mettl7a3	M5	brown	-0.0598623052948148	-0.0934303191254313	-0.065169513406393	-0.0439079692878669	0.0796339927066307	0.105534314388714
Arap3	M3	blue	0.0125927287430343	0.0682032015058984	0.136184515922615	-0.0257149392163366	-0.067748169673407	0.0380220267217829
Asap2	grey	grey	0.0722501614498108	0.213751721392525	0.0926085386252936	-0.0847707643408617	-0.0776370207112119	-0.155145174401752
Pla2g2e	M4	turquoise	-0.0381915651704674	0.0996561780805876	0.0554378597467944	-0.0247600766187732	-0.0301188073729592	-0.0976546255786247
Tafa1	M1	green	0.015109635812295	0.00160715309830535	0.0208947238248784	0.0282816657065945	0.0130531264137325	0.00627115906309574
Fam162b	grey	grey	0.0173064014157137	0.100778834257321	-0.00203593098264398	-0.0361860940852728	-0.0036334635611293	-0.0411891069926243
Top2a	M5	brown	0.0563009548244535	0.0162509774214287	0.0207769828906475	0.0171530319861769	0.0122514168305606	0.00618388772510478
Fam227a	M3	blue	0.0136155892695068	0.0336511230179477	0.0344452723288637	-0.0172364097328544	-0.0217162801473358	-0.00945133881335632
Fjx1	grey	grey	0.0940548899088978	0.218317572665712	0.0556679590063919	-0.110189982556648	-0.11679886888107	-0.164143294988122
Nabp1	M1	green	0.108913413596368	0.0273333469890579	-0.00389777893304551	-0.0432447977814951	-0.034295052661247	0.0601132983634892
Spock2	grey	grey	0.0533522391467041	0.217745698964459	0.196525255055048	-0.122003357447042	-0.17042837623569	-0.143259014497363
Swt1	M5	brown	-0.0349444251040607	-0.0788422878528919	-0.0429167813156663	-0.0121540527612565	0.0558276751418311	0.155894837249799
Ackr2	grey	grey	-0.0306837496899396	0.153824956693628	0.064678506452906	-0.0772776964117569	-0.0246070940619317	-0.0813120974029573
Scarb1	M3	blue	0.0566162373380513	0.129463619170731	0.0981826016218409	-0.0313193132688142	-0.0575657063720818	-0.0152348747655826
B930036N10Rik	grey	grey	0.0306874441306374	0.0461628962037636	0.0251099909506877	0.00748721293867401	-0.0243464452819492	-0.0638118011645525
Ccdc42	M5	brown	0.00950729547045959	-0.156108407845384	-0.0991404274060513	-0.0769406634550926	0.178738404829366	0.301449039463358
Man2b1	grey	grey	0.0830332806656487	0.113003354107964	0.0604234891023232	-0.0567657111099752	-0.0770074833533147	-0.0385074424397758
Gm19325	grey	grey	-0.00598555038785341	0.0341642734792492	0.0713147198228147	-0.0331241575143712	0.0120999202697281	-0.0111778762857048
Eri2	grey	grey	0.0179866290810786	0.0236243708815812	0.0198192373011076	-0.0249717783951378	-0.00899796122271749	0.00366463492541274
Hcar2	M1	green	0.0742551629175443	-0.00719078718139016	-0.0318721172446248	0.0187396217993727	0.0427873488981577	0.075812149848778
Dennd4a	grey	grey	0.0852395352389949	0.0978205934315367	0.00124117229596472	-0.0539221875058805	-0.055197809928432	-0.0248035636059592
Ccdc88a	grey	grey	0.0279273125449476	0.188082315161476	0.0826241442929425	-0.135827005811001	-0.0777944517914968	-0.0877236261004156
Gm17056	M1	green	0.321936472785847	0.0938545610332983	0.0133114342132755	-0.0319052386185583	-0.00367818359558	0.0989882429707904
Rgs10	grey	grey	0.0217574010037831	0.192707558718488	0.0207431476440754	-0.0448896733232607	-0.0770155546744711	-0.122076497717335
Pdgfa	M3	blue	-0.0409797483205353	0.113107542823776	0.0616969715439352	-0.111469526901951	-0.10556039768453	-0.0405427102000207
Cpne8	grey	grey	-0.0160752234174936	0.202338243761083	0.104631234138422	-0.0474853105219185	-0.0835502557282671	-0.148354563074105
Arl4d	M5	brown	0.0854320629572839	0.0400237000005343	0.0267021220718577	-0.0515287596117484	0.0146438257552794	0.0724783507565599
Erfe	M2	yellow	-0.03712142724928	0.00484925563336617	-0.0122903712529476	-0.0182650293396328	-0.0363537795076305	-0.0284597083994847
Slc7a11	grey	grey	0.00224795270362038	0.0631448357552467	-0.00440550296090098	0.00532063617701344	0.000905686881759559	-0.0420398714086797
Cdkn2a	M2	yellow	0.0268180390398615	0.0604590677657731	0.0163495626111827	-0.0118819987259816	-0.00844804292355316	-0.0505965723630558
Coro1a	grey	grey	0.0150625658959406	0.0559291923991697	0.0558919671811942	-0.0461213850323144	-0.0132729695985516	-0.00749600973918626
Adgra1	grey	grey	0.0287493893014821	0.0533718298888841	-0.00897200327997424	-0.000570909096085675	-0.0122595616731581	-0.050106175736153
Rhox5	M1	green	0.0653109625992952	0.0365522518377071	0.0265942957156536	0.0163409422951269	-0.0265846654185026	0.00640911536766752
Tnmd	M2	yellow	-0.0272446245696101	0.0317864978532371	-0.00440550296090098	-0.0109844713538783	-0.047504802707695	-0.0487310037820494
0610030E20Rik	M5	brown	0.025605822287436	0.0190341427641625	-0.0154500935576623	-0.000459864533751897	0.0118852208835924	0.0602116604666412
Tspan2	M3	blue	0.0606862513314177	0.0699180869871186	0.106839393994651	-0.113474423467042	-0.0857675797664975	0.042422080578159
Gadd45a	grey	grey	0.190285505566575	0.175024188975265	0.0246830736394505	-0.0707076796884802	-0.0700468382157767	-0.0672807150225346
Tram1	M4	turquoise	0.0498933318369593	0.320330294385239	0.102358372444735	-0.111522052558524	-0.056533288889684	-0.247346867480954
Cenpb	M3	blue	-0.0396970887491687	0.14818992122718	0.0708880354716102	-0.104751331055962	-0.0364674089414262	-0.020843951451873
Sgip1	M5	brown	0.0403163815848106	0.0121507772625387	0.0152931659663866	0.0111654562528066	0.00358890202967643	0.0530427485791377
Rasgef1a	M3	blue	0.0531312579792673	0.0950321993502918	0.0949479328563168	-0.0268893037479158	-0.0629170095021462	-0.0337078273319835
Fam149a	grey	grey	0.0132048130031258	0.132987593526718	0.0157405147173951	-0.0677493765968547	-0.0222786462108912	-0.0781265474912852
Rps20	grey	grey	0.162685385165595	0.545996701837098	0.218524769010792	-0.239904596919105	-0.233966507393707	-0.263106036628727
Arap2	M5	brown	0.0744965403965565	0.00381452737319628	0.0138839703705105	-0.0526623404526467	-0.0259585930836226	0.091798497887262
Fry	M4	turquoise	-0.00875124786273909	0.170156721344457	0.131844198086248	-0.00824044988089685	-0.115036183434331	-0.154222539436208
Eps8	M4	turquoise	0.0510142422847119	0.187504366523433	0.039222381936269	-0.0448945178977673	-0.0663875297373614	-0.165659067420255
Ipo11	M3	blue	0.0288316068892686	0.040944857038154	0.0653672134149366	-0.0656100500505946	-0.0461195766577703	0.0239901419016659
Spire1	grey	grey	0.071915421032883	0.136330936580161	0.0576944448108856	-0.0805171791823728	-0.0671368160089846	-0.0684970471070037
Wnt4	grey	grey	0.054716127678326	0.0524965189612045	-0.0105481577817355	0.0236866152337194	-0.0630792255458002	0.00867471854341611
mt-Atp8	M3	blue	-0.0616567398834022	0.133787262618771	0.0504185973325617	-0.15383990642341	-0.0826222277860633	-0.025590034056632
Ifi30	grey	grey	0.0605077161092988	0.25783645845269	0.0469897048190273	-0.0886652606105386	-0.106760148246755	-0.182562131073193
Mmp25	M1	green	0.117402240030329	0.0681017646620869	0.0436307173390238	-0.0128895151899401	-0.0421294265153945	-0.034729923422403
Shisa3	M4	turquoise	-8.34466581396413e-05	0.119498445759417	0.0918760618605185	-0.0523986090637353	-0.0298043882033285	-0.113085198005984
Gchfr	M3	blue	0.0131822848897371	0.0613700378939272	0.0475029620548177	-0.0261702658318048	-0.0428014281195357	-0.0220234629453368
Ccm2l	M3	blue	0.0751229480298361	0.0579041815971585	0.0380215777023787	-0.022151375183205	-0.0197797608445922	0.0265793160855512
Efcab7	grey	grey	0.0407767249461122	0.03065143348948	0.0497306321594131	0.0590135620924416	-0.0581653224042077	-0.0165313193191499
Hey2	grey	grey	0.00901190161041588	-0.0114468925654846	-0.027324526346019	-0.0357671200881518	-0.00130760728868105	0.0314623237456792
A930033H14Rik	M3	blue	0.02036811393556	0.0226641522873445	0.0326614714468883	-0.0104758632908023	-0.0138688196619664	0.0237077358381349
Bcat1	M2	yellow	0.015431379830768	0.144736259782043	0.00984863656056435	0.0167486422838063	-0.03272474934616	-0.125778039139926
Kif7	grey	grey	0.0379077581479209	0.0499838570121489	0.0308491848805074	-0.00492454396667496	-0.0288392469517155	-0.0122921562452225
Gm12059	M1	green	0.0103070997202697	0.0178862612795682	-0.0284383130272496	0.0154717126476546	-0.0188765658471473	0.00730833719088243
Spata13	grey	grey	0.0587023325500761	0.055450831945339	0.0355822850379634	-0.0071085703668806	-0.00075109713530941	0.00108181549251056
Kctd1	grey	grey	0.0160751457604646	0.0643351262746733	0.0311159531621484	-0.0147149590799713	-0.0437854119041199	-0.0604999865884871
Neu1	grey	grey	-0.0718055761346273	-0.000643342486972003	0.00569200306852143	0.00499957301639594	-0.0779672066708751	0.0103671963532938
Nfatc1	grey	grey	0.222189815896972	0.293222856333244	0.142923194554827	-0.084597916916641	-0.147451622861364	-0.168782652205281
Cep290	grey	grey	0.0219432413307697	0.0967099140998624	0.0726024329942847	0.00329806673470087	-0.0518348054259521	-0.0358593625882614
Ier2	M1	green	0.586863736072294	0.341632987092407	0.0528896600975594	-0.072570262644108	-0.0792774199016496	-0.0399430510145798
Tgfb1	grey	grey	0.116497998188205	0.203739350451862	0.0807923167704679	-0.0518105296293362	-0.0533160042444555	-0.0913623245907447
Ccnd2	grey	grey	0.0744991945838298	0.202023480133796	0.0158487907088967	-0.0726066498286932	-0.113786185168216	-0.0759704217065442
Dph5	grey	grey	0.0422776815594279	0.0691749330826069	-0.00148030898588632	-0.0331069641232571	-0.0277308678199013	-0.0137625707611204
Lyz2	M3	blue	0.0432131252714521	0.0196419160841541	0.0226267027784889	-0.0883892863191383	-0.0281300156076192	0.0740597857285751
Tgif1	grey	grey	0.167570540404849	0.245564899311902	0.0286922160540489	-0.103618842890606	-0.0789314117281677	-0.150802998063922
Pts	M3	blue	0.00604915605409895	0.0173674846049781	0.00904215767478106	-0.0615845812370521	-0.00704749210667716	0.0332018255288486
Tlnrd1	M5	brown	0.0681351008627416	0.0624227717402273	-0.0342468013111775	-0.064258572593557	0.00371882473762592	8.76144229803653e-05
Arhgap18	grey	grey	0.0730830723237092	0.145932945883645	0.0856306452360276	-0.0341503726143836	-0.102414142942086	-0.112971190015131
Piezo2	M3	blue	0.0237240429333939	0.111733802179968	0.0579091617399245	-0.0737040846935454	-0.00965142748682192	-0.0630479845077903
Serpini1	grey	grey	0.0127357315232112	0.147800221531071	-0.0305980775661512	-0.0340285482757718	0.00836785825208254	-0.0854487108415755
Madd	M5	brown	0.0210052773053719	0.0144462324112327	0.0697561661883048	-0.0349573282927972	0.0120769235992787	0.0169528602272401
Pdzrn3	grey	grey	0.139549429800004	0.210236243452109	0.10882509827256	-0.11318821351422	-0.204411214188948	-0.118521833232535
Sqle	grey	grey	0.00147668754451104	0.0562829716346915	0.042966329936233	0.00082069700874917	0.0182547101817945	-0.038266886315591
6330403K07Rik	grey	grey	0.0883801068873315	0.167710213689054	0.243548616390729	-0.0693606578160151	-0.230985535155423	-0.182127253111891
Smagp	M3	blue	-0.0290459738869207	0.0428279746887506	0.0959903557379215	-0.0615477586909765	-0.0312026745785676	0.0672347146412028
Vamp8	M3	blue	-0.0499633681435465	0.1056709402751	0.0510922207142129	-0.19573605290745	0.00991864837085839	0.0663932476540395
Plce1	grey	grey	0.0210804088252116	0.183391756443556	0.0436537821503942	-0.0528052575989435	-0.0465743601773901	-0.147605328175342
Tmem100	M5	brown	0.0529711863387604	-0.0480105403369351	-0.0459845494296032	-0.0659516160559122	0.0582361355806204	0.269206259283645
Fign	M5	brown	-0.0240046757929386	-0.119578896007298	-0.11389974474025	-0.0135960081338799	0.132074914105606	0.171148384351693
2310068J16Rik	grey	grey	0.0102303907624557	-0.00544460482571681	-0.012804647416092	-0.0213632911102559	-0.0213239419354057	0.0418080864550106
Hmgcs1	grey	grey	0.0708916841147747	0.0985446285153258	0.0233123291752521	-0.0535416813249485	0.00114836771760767	-0.0103257249509217
Irgm1	grey	grey	0.074544089031523	0.126188337554146	0.063851046711865	-0.00865641545035649	-0.0831359371870029	-0.0601819037131974
Nptx1	M3	blue	0.0313828719470495	0.0437088331676942	-0.0265635338727546	-0.0355126566074935	0.00914871621186891	0.0190268978309415
Xlr	grey	grey	0.0423273547340939	0.0739799679046039	0.028423828915039	-0.0076093856462213	-0.0367826475392442	-0.0706138021231354
Nrg1	grey	grey	0.0495824050159435	0.135288924405616	0.0343266726896109	-0.0230314964161888	-0.0593382098551411	-0.11727485596972
Gpld1	M4	turquoise	-0.0323620720947379	0.123249078376876	0.126919843472243	0.0232134684902637	-0.0226840465139199	-0.128282957495278
Ccn5	M5	brown	0.0364426398326989	-0.129517284602672	-0.141046297211721	-0.0777602899333437	0.127205418348057	0.366235248652705
Hdc	grey	grey	0.0240524306405805	0.0558772568206142	0.0370969723065831	-0.0544341365415483	-0.0138089763502263	-0.000360741508070144
Zfp398	M5	brown	-0.0488479878808184	-0.00216004541693826	-0.0281529370593024	-0.0236660052072975	-0.0470094322415806	-0.00453890174671468
Smad5	M4	turquoise	0.0225841657994521	0.154714075866489	0.0761362776533213	-0.0371252551241792	-0.029535930685902	-0.101210572041434
Bcr	M5	brown	0.0108371295084164	-0.00725519728732817	-0.0228029915559897	-0.069984342700851	0.0417097141293476	0.0932899841530319
Vwa1	M4	turquoise	0.0140171133750989	0.26428829233482	0.0481852470394342	-0.0741907394668694	-0.0684111753014072	-0.233771059617894
Fam43a	M5	brown	0.0948662085634933	0.0445387698410222	0.00248364502400646	-0.0500785175948778	-0.0101740154355249	0.058024929502761
Hoxa7	M5	brown	0.0478516155524497	-0.0948227026267676	-0.0694842408197833	0.0340097345125988	0.0602885898519871	0.192814205724772
Rab23	grey	grey	-0.00454013655339119	0.200415140402312	0.0919378686673834	-0.0843189936214745	-0.0183721077682444	-0.135809760810549
Snx18	grey	grey	0.0976007207415329	0.136897908045586	-0.00621498564195953	-0.0730134828895361	-0.00638914476326126	-0.0567246072122876
Tbx3	M5	brown	0.093799093549717	0.0458461531579943	0.0937752014048989	-0.0281095980051965	-0.0650779311511825	0.0351546286926587
Epha4	M4	turquoise	0.0376475167971101	0.198258656778038	0.144236513720079	-0.0218551250317711	-0.0866791854694271	-0.170566672363852
Vgll4	M5	brown	0.129496126694046	0.0815995581422763	0.0267691347072228	-0.0386323229906671	-0.038889447208649	0.049952288943896
Unc13b	grey	grey	0.00881574219799506	0.0887891873012929	0.0529622130502329	-0.0207564551566247	-0.0676478801423137	-0.0736508794240828
Endou	grey	grey	0.0382962044516357	0.0871227700273923	0.0917404348942503	-0.0145492280014069	-0.0314400649042027	-0.0593812837388196
Eea1	grey	grey	0.0900018507006511	0.209163305245519	0.0513340454027188	-0.132516439417027	-0.0973447813728072	-0.10980484514912
Lox	M5	brown	0.0702996196867658	-0.170024012154697	-0.165383065474076	-0.0465616990237953	0.182056003267767	0.398527848445624
Adamtsl3	M4	turquoise	-0.0370813571650837	0.20745216667395	0.0825514340648679	-0.0231675637315441	-0.0251322542516844	-0.202731584410544
Mal2	M3	blue	-0.0107137038435449	0.0184685339131032	0.0520106144337927	-0.126238015784883	-0.0106112922414546	0.0769783833305207
Gm16287	M1	green	0.0607761712741752	-0.0176597880460582	-0.0464471133216547	-0.00407428542951074	-0.0250196517820212	0.0566853285020086
Atp8a1	grey	grey	0.0439211108418935	0.139766304144323	0.0886768684610506	0.0107450947546636	-0.148322761778884	-0.0929376653039814
Dnah7b	grey	grey	-0.0530249158124355	0.0509347296372782	0.0293243428448168	0.0189748457692738	-0.0312436188344568	-0.0585056414874866
F5	grey	grey	0.0216297414675776	0.0187631929058325	0.014215392630337	-0.0340166012978847	0.00531911923353557	0.0142359074888466
St8sia6	grey	grey	0.101083011429921	0.0858578657256846	0.0664167348894224	-0.00401658147612844	-0.0569307541910687	-0.071711417655826
Olfml2a	M2	yellow	-0.0133437612022765	0.0456925597160456	0.0402198685497865	-0.0218330804492442	-0.0158439071510075	-0.0558363875086861
Capn3	M3	blue	0.0182372756586982	0.00738789194639909	0.0172010481287803	-0.0448868790906853	-0.0274703705054161	0.022890321175797
4930405A21Rik	M3	blue	0.00644409680825692	-0.0018868583227251	-0.0104772626390215	-0.0380559245742866	0.0362113381613325	-0.00191474336194632
Eef1a2	grey	grey	0.0482644352669537	0.0858071265748471	0.0334188644630667	-0.0471549858466709	-0.0208287158126355	-0.0781972453892273
Tdo2	grey	grey	-0.00456452700377152	0.0136934084699759	0.0342345082067061	-0.0474590183438331	-0.0593937021177232	-0.00973778987309671
Gm42939	grey	grey	0.0512020448840749	0.0559220768176539	0.00332370767176919	-0.0526358531562953	-0.0469790981422596	-0.0498414235846327
Gm15472	grey	grey	0.0140224879264872	-0.00442250066989789	-0.0259947586886942	-0.0469982576876308	-0.00190773048290634	0.0187576913239213
Wnt2b	M4	turquoise	0.00285142344707115	0.0958968296171503	0.0228826199041166	-0.0403656521307578	-0.000881697892391684	-0.0845248805861098
Pitx2	M2	yellow	-0.0258188312051973	0.080878824405371	-0.00739776535515489	-0.0259136173587501	-0.0138573871814566	-0.0758788158033466
Rps6ka1	grey	grey	0.00354564441957626	0.0298224075896592	0.04149982911812	-0.0116637479278089	-0.0563069123026144	-0.0328638206285749
Tec	grey	grey	0.00854533167608915	0.0970818209822644	0.0457984469535643	-0.0252508488468281	-0.0121843429262629	-0.0500428950172443
Zfand4	M5	brown	0.00637318046158354	-0.0450610543891477	-0.0536786579714308	0.00905738240158317	0.0549242885636385	0.0557537157440934
Slc6a13	grey	grey	0.0388062853147468	0.0614600052702527	-0.0038284208102115	0.016061139135917	0.0143734961101187	-0.0223504941582886
St8sia1	M2	yellow	-0.0168908748216007	0.0999337810450857	-0.00739776535515489	-0.0351899033778676	0.00332731138774619	-0.0823461520629474
Mansc4	grey	grey	0.0228587601575799	0.00981909651883893	0.0100609920485455	-0.0887236336368272	-0.0472176029571944	0.00680106088972216
Gm44752	M5	brown	-0.0544414758210943	-0.0599401862722802	-0.0543551894648043	-0.0081099371617893	0.0411285757898871	0.0732262117875507
5430400D12Rik	grey	grey	-0.0291943485860322	-0.0240443249632485	-0.035692993453628	0.0123628137293069	0.0107125728051829	0.0168002536523347
Sox6	grey	grey	0.0280896031435847	0.0618102794744823	0.0401450587376486	-0.035619359302839	-0.0610669421075304	-0.0291976338942589
Gm32389	M1	green	0.0607762707539572	0.00487295742609606	0.0183531376828314	-0.0119739343366974	-0.00547973663496002	0.0218630052091843
Gm16793	grey	grey	-0.0279360400135196	-0.00800310194413993	0.0122341734826271	-0.0053989775075934	-0.0279106815238186	0.00687989490283752
Cpne7	M2	yellow	0.0322616526804411	0.0550787683195003	0.0149782185894868	-0.0297654722969567	-0.00691687206713	-0.0811371557020558
Gm45890	M5	brown	-0.021825259224363	-0.0340126538355211	-0.0159529437029625	0.0398916463222519	0.0211847854596714	0.0312280908189102
Trim67	M3	blue	0.0530650773129211	0.0816381815581707	0.108904708314557	-0.0373313825396185	-0.129859979427453	-0.0690680630397374
Cd3e	M2	yellow	0.0330606572816354	0.103662040260992	-0.00739776535515489	-0.0912028655435516	-0.0528279689005718	-0.0695545213934258
Senp8	M1	green	0.0290035873124701	0.0183877996968427	-0.0130166585722378	0.027740310980828	-0.0155050783443423	0.0196958206709266
Pclaf	M5	brown	-0.0344712538674966	-0.0216269965290011	0.00746914262604683	-0.00533837261737534	0.00616587456434885	0.0220479610740091
Dna2	M5	brown	0.00113403157079087	-0.0116099685356772	-0.0213801527596247	0.00864868682192647	-0.0193898903310048	0.0151196540704394
Gm47093	M1	green	0.000215329525304247	-0.00312590192788033	0.00690489596655125	0.0403421294538411	-0.00852632746669938	0.0135130880672674
Egfros	grey	grey	0.0431795752633213	0.0548825909312017	0.00578379375546878	-0.0115588507158522	0.0129202005395604	-0.0441021432441364
Gm12052	M5	brown	-0.0345159648856962	-0.0686391889710922	-0.0223117385869787	0.0298335824877253	0.0297539146162518	0.0476915392330768
Cyfip2	grey	grey	0.0346951205910251	0.0944734787952085	0.0882552657813893	-0.0525505393393733	-0.0228828748890529	-0.0504209095539442
Map2k3os	grey	grey	0.0269329764543338	0.0571962314876893	0.0614726884643501	-0.0386478960537991	-0.0582350958045171	-0.0438990778749367
Slc2a4	grey	grey	0.0553633935647615	0.0640076324531882	-0.00280928132511885	-0.0149539739010203	-0.0692642473293047	-0.0322757776967296
Gm19967	grey	grey	0.0422115660842388	-0.000141113070863717	0.0234204161510819	0.0275495664788877	-0.00386061920520519	0.00268833972301668
4833417C18Rik	grey	grey	0.0326151289866368	0.0489658023051936	0.0097197132289865	-0.0181029836909853	-0.00402520678209941	-0.0381307409699984
Aoc2	grey	grey	0.0226195783465404	0.0233901368197894	0.0520955889371168	-0.00762090107912496	-0.00498808141649456	0.0199426815217309
Plau	M2	yellow	0.03069031011606	0.0643250016080611	0.0165058606569805	-0.038466858966115	-0.0286531765591273	-0.0784976292831464
Zfhx2	M3	blue	0.00257573352342775	0.0159083687950904	0.0631143101514964	0.00547262074810588	-0.00983604897328262	0.00725832355962175
Gm49179	grey	grey	0.0802779884837777	0.0452090343974097	0.0390896212700291	0.0161666450929349	-0.0138762384327252	-0.00612238787376628
Fam243	M1	green	0.0379321646153398	0.0108231885365833	0.02923403501603	-0.0215726827209087	-9.31942412707713e-05	0.0187883890446001
Slc1a1	M3	blue	0.0548120375778567	0.0397548783984371	0.0478453072859825	-0.00544719531274071	-0.0251298933128282	0.0258693396933168
Hhex	M3	blue	0.00253143986973989	0.0427297700954389	0.0708484627512346	-0.0416511558187537	-0.0143177991738502	0.028678257305258
Blnk	M2	yellow	0.0445169242530312	0.0953312957693547	-0.00654519174035429	-0.025488185780064	-0.06771164301079	-0.0792048364974684
Cited1	grey	grey	-0.0182715530296808	0.0251462934722186	0.0521769516059426	0.00334363719756372	-0.0194463794217437	-0.060106145120171
Kcne1l	grey	grey	0.0438072208855016	0.066969993204726	0.0770396805676335	-0.0116750056937197	-0.061495594368018	-0.0755169965687852
Capn6	grey	grey	-0.0421547594559836	0.055666331751239	0.0592990923301214	-0.00110908857387541	-0.0132400997868994	-0.0868537437265804
H2afz	grey	grey	0.237913921958404	0.325443200294515	0.0976677868558264	-0.137201503205392	-0.155512000156513	-0.0819314731021556
Npnt	M5	brown	0.00126781204255797	-0.393641690973752	-0.283873721799831	-0.024779953033505	0.291459838437749	0.647914340830925
Synpo	grey	grey	0.0476375228152746	0.138777251256582	0.0321712495855846	-0.0140008458426165	-0.0415577999481364	-0.0666477724116693
Gm14636	M5	brown	0.091037885638164	0.0554621117410616	-0.00751783632698223	-0.0772057187690095	0.0302161656271557	0.0102062437347976
Alms1	grey	grey	-0.0212279261045196	0.0762913785401875	0.0418644531052086	-0.0538678261605589	-0.0240588366906361	-0.0747130278192778
Chst3	M5	brown	0.0380638200879175	-0.140649137564155	-0.0829920007234565	-0.0569826413162699	0.0951555993938368	0.267659875825973
Lrrc55	M4	turquoise	-0.00551692696329224	0.118932512831974	0.0426691414081532	-0.0524796661220603	-0.0301332383825449	-0.101832025892528
Ddit4l	grey	grey	0.0621922166930469	0.100414029555631	0.146187066285784	-0.0235322856463659	-0.151858457970001	-0.0954678328230617
Wscd1	M3	blue	0.00646701654728294	0.0670551746444328	0.0872637265849589	-0.000662882350622233	-0.027251172949632	-0.0124467798414763
Nog	grey	grey	0.0136595575717051	0.0874419526909602	0.0463151059759453	-0.0166505428922638	-0.0482575494948926	-0.0649488013428507
Six1	grey	grey	0.0293660632111131	0.098030360561402	0.0309084672686064	-0.0277625401017809	-0.0274580525008694	-0.0815551983190105
Dennd3	M3	blue	0.0635676662237465	0.0968315438881375	0.07723805697798	-0.0248518356819005	-0.0593875190688784	0.00600433177755984
Xlr4b	grey	grey	0.0116848206205906	0.0689692027647056	0.00280864796515021	-0.0520985779228774	-0.0329277788204403	-0.0276572928876603
Gspt2	M4	turquoise	0.0523302993104268	0.118942824873923	0.0430108213712245	0.00185895918883276	-0.0234320516178074	-0.0981151765384701
Serpinb6a	M4	turquoise	0.0450685560606701	0.410553392632182	0.121891203118455	-0.211852903766606	-0.140312224056185	-0.208913040861529
Tnip1	grey	grey	0.0966369926960174	0.123252501615357	0.0476329075444492	-0.0400696101305213	-0.0418347678968194	-0.0650562050078622
Fibin	M5	brown	-0.0638206490481686	-0.162326403835559	-0.137462267236582	-0.115733301603164	0.23824578552899	0.326597087256467
Panx1	grey	grey	0.0511708660947821	0.15475928580207	0.0595884822745317	-0.0476351230869194	-0.0511446324645404	-0.117680381343411
Fancm	grey	grey	0.0133218335378705	0.0189624774944468	0.0371657228011581	0.00244578839663959	0.0171060996385195	0.00581425082848292
Nrtn	M5	brown	0.0359738196260774	0.0479680578900381	0.0416177639316556	-0.0187340178213609	-0.0266094508556065	-0.00831436296387155
Nsg1	grey	grey	-0.00632088297233696	0.225338007362902	0.0964973293568634	-0.0995087201476308	-0.0613932999802805	-0.113309599355393
Dpysl3	M4	turquoise	0.00227985574640507	0.295493960533019	0.0660481691335809	-0.131149000868823	-0.0833714113998393	-0.206308763618615
Rps5	grey	grey	0.161124932796595	0.623539285615213	0.280836882701787	-0.244845964893836	-0.279119255645317	-0.358751767266396
Cep83	M5	brown	0.0170792008824331	0.0322925454901826	0.00196242204246078	-0.0824458276549326	-0.0173489258388328	0.0226018709976064
Poc1a	M3	blue	-0.0173125054928671	0.000280263244772764	0.0303355567460039	-0.152331129255211	0.0316237362981505	0.136397393325823
St6galnac5	grey	grey	0.0113169492984643	-0.011043954807802	-0.0268546975388913	-0.00438186707239655	-0.0720541031369806	0.0538293950681036
Foxq1	M5	brown	0.0436135199908562	-0.0979216129170076	-0.035730591056412	0.00522212581438053	0.0937094897744869	0.151546467280045
Birc3	grey	grey	0.15454223724024	0.117055337118256	0.0373826476164949	-0.0465628365473532	-0.0184565185316399	-0.0336234271787137
Cntfr	M4	turquoise	0.0695655852166559	0.223985705533686	0.181403795746562	-0.0347403494271755	-0.195832591537996	-0.228902810611283
Rgs4	M2	yellow	0.0550463300910561	0.146950543638419	0.051850808832541	-0.0515436117377701	-0.116579595660624	-0.106302052263122
Zdhhc13	grey	grey	0.0216507708575297	-0.00127304109190719	-0.0326929908735885	0.0212004288311646	0.0254154568721344	0.0206232006728737
Npas2	M4	turquoise	-0.0194714500474509	0.118652678948568	0.040272182614076	-0.0696174901479901	-0.0130103048878578	-0.121330678370961
Pex26	grey	grey	0.00803584190842668	0.0265706473517963	0.0378538060601614	-0.0403750562554311	-0.0448416758214749	-0.0179601327028161
Adamts6	M2	yellow	0.0320074168153672	0.110295309961678	0.0719211051505782	-0.0649869247878298	-0.111242488844271	-0.110913241808458
Lrch2	M4	turquoise	0.0168689838257687	0.115686846954013	0.128026733348415	-0.0553898512098072	-0.100915478249347	-0.118271492520971
Gimap8	M3	blue	0.0277588427482752	0.0637463495994388	0.120236524988601	-0.0303393426609538	-0.0204716284793159	0.0256330625397051
4933406P04Rik	M5	brown	-0.0158788270353085	-0.00721848851238552	0.0419898833429762	0.0166859770342181	-0.045233459297529	0.0118860267189315
Arpc1b	grey	grey	0.0795265648896209	0.439284315618982	0.118297616980421	-0.183133921364208	-0.130439867664336	-0.296511856498988
Slc25a25	M1	green	0.304873672200453	0.0824689103285824	0.0109277186051845	-0.0499285608908101	-0.0297975338575543	0.0812491586226152
Hspa4l	M1	green	0.122337964160802	0.107331941965544	0.0671513415604173	-0.0924024611867004	-0.0501565602047476	0.0106575794946825
Chka	M1	green	0.198737073542155	0.0886407397333766	0.00106910479717709	-0.0412685197651523	-0.0330302816246546	0.0283830249799251
Zfp697	M5	brown	0.0351715985081197	-0.0386736589858162	-0.0193331635895332	-0.0291123476734842	0.0202376721141466	0.116316360502387
Pakap	M5	brown	0.0379345701280168	-0.0693914538153894	-0.0852068612807579	-0.0109095680974375	0.044373799319349	0.125716008829937
Ptgfr	grey	grey	-0.0614630943767065	0.038704846412507	-0.0161584024304082	-0.0278948639274353	0.0899201706814756	-0.00485458048109007
Apobec1	grey	grey	0.0316511474006038	0.0799000354077383	0.0359190565835536	-0.0209646752340548	-0.0752492233041383	-0.0685285777476889
Cep83os	M5	brown	0.0222645475689672	0.00413476609898477	0.0111792649977899	0.0313251413514934	0.0379430445765868	0.049299889367918
Zfp994	grey	grey	-0.00110541267453905	0.0465693612952517	0.0345157410367978	0.00422830469494598	-0.0295467983745522	-0.0327209003573983
Glp1r	M3	blue	0.059695363111636	0.0573354446907319	0.105471267716437	-0.0138631372671403	0.00371559269045171	0.0428245539371377
Epb41l3	M4	turquoise	0.0191735131677727	0.171896831656312	0.0585230327400509	-0.0617358276700178	-0.0482485295627682	-0.176387121651622
Abcb1a	grey	grey	-0.0286932948196732	0.119558794153592	0.0203574692523761	-0.000451054578319503	-0.0415411181482145	-0.069820319375173
Gltp	M3	blue	0.020105606727333	0.14904074009675	0.083040409717502	-0.114039523224305	-0.0252112694890972	-0.00495381125982083
Kdelr3	M4	turquoise	-0.0458754648710777	0.30014577330627	0.117395253345312	-0.0724639332411745	-0.0915969394816421	-0.237770562072909
Nufip2	M5	brown	0.194023078356062	0.118987062947029	0.0155105466768252	-0.051659201210532	-0.0509507393422609	0.0148226518451044
Reps1	grey	grey	0.0809591813667553	0.0552389606895793	0.0408903833648389	-0.0810801514917412	-0.013182941229032	0.000638510817368276
Fzd4	grey	grey	-0.0267421940719129	0.176386898513565	0.0838603918459681	-0.106983856371221	-0.0471099760173709	-0.130961407349431
Rabepk	grey	grey	0.000369138318503127	0.0185057131791917	0.0148956474952725	-0.0197061800710869	-0.0209365461639017	-0.00228346965559074
Fbxo33	M1	green	0.130504988709043	0.0674888727138113	0.0473387873614098	-0.0234183743328041	-0.0318448628758054	0.0100896840404463
Nanp	M5	brown	-0.0547954419383663	-0.010851445682469	-0.00337214925890076	-0.0222097331829548	0.054172630320027	0.0111630039966053
Lekr1	M5	brown	0.000241209845310715	-0.0283529073978573	-0.0400066589847898	-0.0426227875792307	0.0023451106367665	0.0455040923093312
Ephb2	M4	turquoise	0.0170880104673248	0.138983808007486	0.0688155755402162	-0.0195910199156386	-0.0263196940073997	-0.147361333550314
Fam171b	M4	turquoise	0.0189916235524846	0.19886319303129	0.0577164444932912	-0.0487214079620899	-0.0643195244668858	-0.173433617273077
Gm47863	grey	grey	0.0507840853925123	0.0344463041142353	0.0144010923022009	0.0123628052926465	-0.0398586543520505	0.00458648889489403
Nudt16	grey	grey	-0.0663940612671657	0.0381837547460701	0.0111318960294836	-0.0505192482064968	-0.00839221097076314	-0.00806019360593652
Khdc4	M5	brown	0.0796914947244926	-0.0095062093889937	-0.054143084444683	-0.0206487580286825	0.0298978823103966	0.0818360885771357
Pcolce	M4	turquoise	-0.0142599051071135	0.256317198002504	0.00652748713161265	-0.110272516368794	-0.0512933438351202	-0.116107146401761
Zfas1	M1	green	0.331973153216983	0.212437546027449	0.0370756143513879	-0.0566906072536662	-0.083196837234823	-0.0186022678102805
Rassf3	M3	blue	0.0271418881096698	0.0367877495538945	0.0612416679908897	-0.172073355276211	-0.00805799061214904	0.0853659620087282
Cerk	M3	blue	0.041540588744852	0.0549631008872778	-0.0155105707961024	-0.0141220890268548	-0.0156973406815491	0.0287660140294485
Hlf	grey	grey	0.0869327229978206	0.150238854938223	0.0700870196568286	-0.111542264726476	-0.0896366401782606	-0.0750935260955712
Smc4	M3	blue	-0.00159457429038231	0.0643181287378939	0.0122998661090384	-0.0559011713497551	-0.0257248571362431	-0.00314415513741019
E230001N04Rik	M5	brown	-0.0182087985786874	-0.0666026220276412	-0.0550005279727382	0.00277035311787829	0.0541712777445295	0.0972508120509133
Oxct1	M4	turquoise	0.00824966669528119	0.290975628685646	0.137969214791512	-0.070605597758582	-0.0968936232125775	-0.224726212003429
Crat	grey	grey	0.00641255517568349	0.10153037145115	-0.0192376060478902	-0.0576197956959375	-0.0347339025616805	-0.0247455993796211
Csmd1	grey	grey	0.108071631725124	0.172526558799456	0.188284781630222	-0.036650532083922	-0.22748386157637	-0.166470729957016
Procr	grey	grey	0.00303344203025891	0.136178841833977	0.0109810096281831	-0.0812115275977672	-0.0340253439976977	-0.0973511737847373
Pcdhb20	M5	brown	0.00931229590117913	-0.0165850682909106	-0.01180225707682	0.0131698743940354	0.0565225249946193	0.0402551354274951
Rhoc	grey	grey	0.0879290458448276	0.442417693081388	0.177760897455684	-0.151187247129634	-0.159432595665606	-0.315293233054972
Adamtsl1	M4	turquoise	0.0143219791751175	0.192894599155933	0.120196542568925	-0.0542673494290665	-0.163477876707231	-0.208347238853828
Flnb	M4	turquoise	0.0388247374424198	0.221775795421863	0.100277882816264	-0.0827386921400924	-0.0256712691150817	-0.160020789942289
Dnaaf2	grey	grey	0.0256685021385116	0.0474563884186716	-0.0210084793681722	-0.000200526246404664	-0.0255176354415644	-0.00883178963130989
Cped1	M4	turquoise	-0.125146819034114	0.176642128533226	0.0942772383292231	-0.0526304903983205	-0.0689825286493855	-0.148962676317111
Gask1b	M3	blue	0.0259810827327652	0.0890250917671946	-0.00852257665375274	-0.0719531992015132	0.050850390427947	-0.0101444976557879
Tma16	grey	grey	0.0734082099066381	0.165872354436577	-0.0016560760098904	-0.0485869753038958	-0.0881426942068753	-0.095357369575386
Rack1	grey	grey	0.147509707267985	0.482931043875961	0.221578766398794	-0.173266097231823	-0.201341887336579	-0.288253924348223
Tshz3	M4	turquoise	0.0378061794002945	0.192455774590183	0.0965190162053585	-0.065991007009544	-0.0964106699905239	-0.134385068164227
Mamdc2	M5	brown	0.0536123279755674	-0.00838894328162877	-0.0358004281007194	0.0108397045914808	-0.109787726350736	0.15960790058078
Oxnad1	grey	grey	0.0990733513462795	0.1492374167747	0.0454747206049067	-0.0811680175629451	-0.0227566637225334	-0.120271762901059
Pdzd2	M5	brown	-0.0890159478568011	-0.252251907466067	-0.217673446996793	-0.0435341985132156	0.234801477251678	0.372694087298927
Pwwp3b	M1	green	0.13785503265105	0.0435301532187197	0.0265507206607065	-1.60332193385005e-06	-0.0694182902653443	0.0070942948428276
Samd11	grey	grey	0.0311910383686531	0.0493540566277195	0.0403805212161955	-0.059180547099676	-0.0147253818506771	0.00110937117919085
Eif2d	M3	blue	-0.0129038156980542	0.0198278293229823	0.00229376167604255	-0.0528787627343178	-0.0156933300402459	0.0140744658539895
Zfp869	M5	brown	0.115730407525384	0.0155921176889565	0.0199224634931619	-0.0218251097791876	0.00919601294233386	0.0824007313465346
Ppa1	grey	grey	-0.0107592055092272	0.177665153759617	0.0111222566443008	-0.088906969870659	-0.0258365535110729	-0.113956965922136
AW112010	grey	grey	0.0113708231824706	0.113173883910595	0.0446335995698427	-0.0279429495741274	-0.0485674105150399	-0.0647331037196824
Tm7sf3	grey	grey	0.0247588820758381	0.237616225861903	0.0809016384132125	-0.0687324493987991	-0.0858228224285241	-0.16751297707971
C1rb	M4	turquoise	0.042914424435929	0.299735307174913	0.0888835742094386	-0.0400903529387992	-0.0585872531703153	-0.208732988344867
Flnc	M4	turquoise	0.0676042404538382	0.281918820280985	0.0739292209643752	-0.0605591298400911	-0.106803861209281	-0.231034637202498
Coq8b	M1	green	0.169275034229498	0.121852953058622	0.0701676428203822	-0.00622489346635563	-0.0271776362360988	0.00989461576746946
Sik2	M5	brown	0.067528490912352	0.0330693274568561	0.00392645093681351	-0.0285284038460287	-0.0112954318898812	0.0501525187580468
Ccdc71l	M5	brown	0.0747790866617421	0.0885781641242849	0.0799806337393174	-0.036543027323801	-0.0549849265568119	-0.0288357725249937
Plcb4	M3	blue	0.0650113500604065	0.124644429189027	0.0607200208290451	-0.107403492752538	-0.0058335415556181	-0.0164047457606599
Cgnl1	M4	turquoise	-0.0456317476526036	0.196758669700522	0.131182677143799	-0.06753574439893	-0.093327048536053	-0.167897513982529
Cdkn2b	M3	blue	0.00394084710246808	0.0380402061971523	0.0202868325574246	-0.0621455234456014	-0.0447230394862416	-0.010833326575409
Ccn4	grey	grey	0.03503269607638	0.116211980572353	0.0122613047170404	-0.0210817160196763	-0.0528189361116261	-0.0713963150439686
Vat1	M4	turquoise	0.0201623408240337	0.310200143697366	0.0638073860534872	-0.146696889116971	-0.0580523839749424	-0.190493515422931
Cdc42ep3	grey	grey	0.0386532161686002	0.111109836336642	0.0938259689484152	-0.0224794203821045	-0.180952799788283	-0.136493282369425
Bche	M3	blue	-0.00224607075445433	-0.0113093089995136	0.00301738663772425	-0.00797435432102659	-0.0539940196801519	0.0474959342687209
Peg10	M1	green	0.0909056236872676	0.00394782595219531	-0.00185364633982444	-0.0294989851288286	0.0133641486031627	0.035465445933604
Cd109	M4	turquoise	0.0378800246131887	0.179287397281389	0.0855970588533685	-0.0665947193675999	-0.109146936812561	-0.15169760362124
Sdk2	grey	grey	-0.013793550399998	0.100503703875285	0.0286369916015678	-0.00846937217967348	-0.0736215019693653	-0.100703935786536
Serf1	grey	grey	0.0138138390956305	0.127266257886555	0.0616053191265718	-0.00726318408056037	-0.0530487562915312	-0.0824978090861159
Kdm3b	M3	blue	0.04931339542957	0.0233982281334731	-0.00809386574033707	-0.0825849294601754	-0.0272082357319924	0.0623611765770382
Plekhm3	M5	brown	0.00142719277283653	-0.00684656949921225	-0.0303423121665494	0.00830120784923209	0.00826641419192253	0.0494786486240329
Aff3	M4	turquoise	-0.00871886163310903	0.200279169152916	0.0820602542647947	-0.0710109294803378	-0.0497880830487454	-0.174777172481826
Gm19705	M1	green	0.0137809643781868	0.000559249189350611	-0.0337396887310234	-0.032694278942081	0.0171239751141186	0.0338390403303985
Mpped2	M3	blue	0.0213328841747703	0.104353524465766	0.114371280401836	-0.0539004311226307	-0.15606624951506	-0.0863089954823828
Ociad2	grey	grey	-0.0116523236705437	0.0946423192032218	0.0282527409838318	-0.0508190256300161	-0.0472476220343209	-0.0545703567539326
Clec1b	M3	blue	-0.0275837329964277	0.027140651143544	0.0837430030700167	-0.04796332505765	-0.044105029978976	0.0406596579345358
Yjefn3	grey	grey	0.0171290528482194	0.0236174940076495	0.0112402101524117	-0.0138460313508404	0.0140157135812946	0.00201882340279654
Spata2l	grey	grey	0.00604387250074361	0.0745253636442569	-0.000952852029544282	0.00238289782110541	-0.00212737916618221	-0.013028083635291
Mir155hg	grey	grey	0.0664659526122786	0.113669696782183	0.0150660136932707	-0.0520338015235971	-0.0610883249970367	-0.0756960079551631
Daam2	grey	grey	-0.0168178705458819	0.109832830287258	0.0455369853451597	-0.0481288733603306	-0.0693078226797917	-0.109572415422641
Shisa2	M5	brown	0.0270091110472786	-0.107403117668741	-0.085580271734668	-0.00108167014175396	0.0957235894659983	0.195993400987823
Ybx3	M4	turquoise	0.0845759842666102	0.513757715388762	0.188091706122948	-0.152566780713064	-0.19739766558975	-0.38638196983358
Ckap4	grey	grey	0.169143661545771	0.361126565558251	0.110879350116395	-0.099602793951382	-0.146200873881065	-0.229360385363816
Igsf10	M4	turquoise	0.0240994957962951	0.23305546163577	0.0865400251417884	-0.106101427950586	-0.136671761398609	-0.158513044554329
A4galt	grey	grey	-0.00403277017104795	0.0368111303340018	0.0106365025482642	-0.0296320603880667	-0.0411971075517015	-0.00358247821831351
Frat2	grey	grey	0.195745281193869	0.204867448408338	0.0944075208212245	-0.0490025068504723	-0.0944067470804282	-0.0934360291133669
Rcn3	M4	turquoise	0.00983717257028785	0.430366371466462	0.158448480688044	-0.116098316051682	-0.267524760183664	-0.323613117683795
Enah	grey	grey	0.158586400058166	0.2027719853276	0.138974711727454	-0.11662662070303	-0.130104010324288	-0.142766665001417
St3gal5	grey	grey	-0.0124759821885275	0.0016441262664894	-0.0458097052666381	-0.0433853562424867	-0.0348415112383401	0.0379114241809999
Fendrr	grey	grey	0.0742392591304638	0.218980658243756	0.196195343638053	-0.0549862312971765	-0.108326688312912	-0.157433121690299
Saa3	grey	grey	0.0324141749029441	0.00701918454367958	-0.0272022793168441	0.0222426405548125	-0.0236487637056673	-0.00734412752412439
Hmcn1	grey	grey	0.0571068767515193	0.201335121998012	0.148440764080879	-0.024320300330126	-0.221616327106502	-0.118640903930947
Sms	grey	grey	0.0175361323769055	0.0611623761213399	-0.00185008688714086	-0.0240798500782928	0.00430814541500769	0.000514920440642124
Crim1	M5	brown	0.0815567341535707	0.0126824599436771	-0.000442146417013815	-0.0839245683176467	0.0146663061329534	0.147694488964982
Git2	M5	brown	0.0177650802523647	0.0544602509112135	0.00366443403978999	-0.0924769354617822	-0.0204088256841121	-0.00491366950764587
Omd	grey	grey	-0.0479339338887086	0.0539706123097541	-0.00932543268771611	-0.0460759675189955	0.0154401491527296	-0.0242206249570064
Gm26759	M1	green	0.0654676479900261	-0.0318040198145324	-0.0306075511647989	-0.0118015120807209	-0.0102399380108035	0.0515735717324559
Adamts3	grey	grey	0.0898392835830541	0.0722215369820156	-0.017502864445914	-0.00298195763666028	-0.0739755317483863	-0.0100935373402138
Lsmem1	M1	green	0.256343261465167	0.111040903782338	-0.0161654333528259	-0.0391557116469953	-0.00243695474013143	0.0246369446468361
Jmjd1c	M1	green	0.346714713179484	0.287624152435236	0.0812209378960465	-0.132426172897954	-0.0758198330657895	-0.109737389316399
Cog7	grey	grey	0.0154565287782146	0.0731506391215262	0.0156640423850421	-0.0198925055558327	-0.0198400979989553	-0.028982263915138
Sox8	M1	green	0.0516587458810049	0.0494639173960806	0.0260871083415981	0.00102053757117543	-0.0139479765201948	-0.00488588318551559
Myo18a	M3	blue	-0.0165895155462875	0.0589677778467995	0.0637078297586255	-0.0737995333295908	0.029993296138986	0.00491639402998779
Vasn	grey	grey	0.124559272771249	0.183978281749362	0.00542237011133162	-0.101513124805504	-0.00704088966454534	-0.0710503262598012
Jdp2	grey	grey	0.15632750144985	0.24738457473833	0.0828303754869749	-0.0530668997645086	-0.0870237707475064	-0.0994081144114592
Xpr1	M5	brown	0.0955790380527167	0.0919779221869	0.0456823605856478	-0.0402022811013429	-0.0965787144134012	0.00211011158071227
Pfkfb3	M5	brown	0.0904965582622743	-0.096289119056413	-0.0877053321173228	-0.0530904133159773	0.0983026130394516	0.256529937317888
Gm49767	grey	grey	-0.0356290857311345	0.0109487062195306	-0.019387444151443	-0.0263308941699054	0.0347487307673159	0.0310319156384503
Rab7b	M4	turquoise	0.0452806422510827	0.196813229035648	0.0583737325359389	-0.0723218215511438	-0.0626233226033664	-0.145460399088441
Cotl1	M4	turquoise	0.0165742404044247	0.226377250460519	0.0365826738070892	-0.0857050596421071	-0.0551661017271344	-0.204832726278027
AU021092	M3	blue	0.0329626986969818	0.0475026538942066	0.0555859326341417	-0.0610081614066615	-0.0624376852029056	0.0263192641654111
Tcf15	M5	brown	0.0675755196136152	0.0213148703038394	0.0380434035644241	-0.00378557941885525	-0.0493507710923355	0.0248122659166885
Shpk	M1	green	0.0263393099940303	0.0238513032553693	-0.0274302627323852	-0.00887404059901093	-0.0133459188510569	0.00351434070020263
Erc2	M5	brown	0.00913162089475133	-0.0377688748912575	-0.0400734881575336	-0.0361002229713129	0.0331492404815949	0.058255198132005
Mroh5	M1	green	0.0891562287730678	-0.00226693094986323	-0.0128134241615556	-0.0346920841391597	0.0398244630338742	0.0548054084431147
Gm26682	grey	grey	0.00386349491434226	0.05471666781613	0.0259557403828449	-0.0107696436786013	-0.020761808205199	-0.0192244626735718
3222401L13Rik	grey	grey	-0.0141805171302414	-0.00609481018370324	-0.0185267206452796	-0.0048771337390375	0.0429581824213202	0.0376230424786792
Pim3	M1	green	0.363204792012047	0.135081949295794	0.0152068728060114	-0.0634144256228098	-0.0733246532103515	0.0983887549800684
Papss2	M5	brown	0.0561256463241648	-0.0187034272017592	-0.0223799576086799	-0.0611795272806501	0.0741396605296218	0.123500635774997
Fabp5	M1	green	0.0930222376656123	0.108514114153067	0.00690346753720292	-0.027841235961308	-0.0189674894332679	-0.0163121175935351
Bcl3	grey	grey	0.14856690524524	0.217593950772354	0.147786974975695	-0.05175082895639	-0.113134981947313	-0.171439036349455
Tubb4a	M3	blue	-0.0642392049770657	0.00603842627563002	-0.0116871311158648	-0.115280835898997	0.0488149312007474	0.0481047643108163
Clmp	grey	grey	-0.00590112927786357	0.17218546199853	-0.016414561652456	-0.0370373890105207	0.0177530150519908	-0.0796392676700484
Gsta3	M5	brown	0.0264872295172132	-0.286484206046196	-0.219578077512275	-0.0656547730135477	0.267936863180003	0.5395309613605
Cbfa2t3	M3	blue	0.0197107823006068	0.0329332364188021	-0.00389028251795796	-0.0682261272291193	0.0240778214089149	0.0622041530157303
Fmnl2	M4	turquoise	-0.000865301067915629	0.2718452443641	0.116131318062298	-0.0633390717015233	-0.0734513222366682	-0.228181911779159
Ndn	M4	turquoise	-0.0302643994595825	0.334102461846671	0.169838217182996	-0.087356230930914	-0.147111376631158	-0.306888553833184
N4bp2	grey	grey	0.0832434646311654	0.0792686151759275	0.0411761499455314	-0.00499256788912272	-0.0317442400146665	-0.0199142374495997
Gimap4	M3	blue	0.00982001412474479	0.0207159462840652	0.00807645950045334	-0.0902680956036678	0.0240202093121553	0.0944382926899777
Rasgef1b	M5	brown	0.145071056440794	-0.0390405320256475	-0.0745139058065846	-0.0641408715076589	0.0356258497747262	0.188134278166415
Ifih1	M5	brown	0.0200747754608022	0.0101888636444444	0.00131157363107109	0.0287929356821808	0.0169830067614675	0.0181047489745517
Stxbp6	M2	yellow	0.0333657367853765	0.219462350407818	0.0924451315444544	-0.0972323211149696	-0.0224391742631855	-0.138187407648922
Igsf8	M4	turquoise	0.0555534321312848	0.321683791752944	0.0639937532073876	-0.116997070653864	-0.101048870390008	-0.273385004067743
Gcnt2	grey	grey	0.131572034351075	0.145102163136451	0.101065753469603	-0.0419594724780106	-0.203757328921073	-0.0517836167264151
Mecom	grey	grey	-0.0332602262459012	0.072750786253733	0.0409875194855268	-0.0252665156964202	-0.0576834387993606	-0.0297337870664657
Sirpa	M4	turquoise	-0.0557113440575794	0.215280450770573	0.05938179757533	-0.0660644012770461	-0.0810582549285573	-0.211371649133456
Itpkc	M1	green	0.235733578221046	0.208965458812609	0.0543871504145263	-0.0574036544916074	-0.0868065104768028	-0.101172316650567
Cited2	M5	brown	0.118499251564369	-0.104924955808207	-0.0656758162351056	-0.0441851109391854	0.125304253094471	0.283725022961208
4933421O10Rik	grey	grey	0.0376135214771669	0.00785389611981375	-0.0308472516794034	-0.00412362895080222	0.0464181571698729	0.0286974329151602
Zfp36	M1	green	0.569823855382641	0.392751328447281	0.106888400218447	-0.135141408922386	-0.127621775752355	-0.117603509021215
Gm42670	grey	grey	-0.0503131297605627	-0.0209980166849558	-0.00361450897947174	-0.0243313634027894	0.0159873040312878	0.0293363882192397
Fam111a	grey	grey	-0.0214390488700678	0.134657633625784	0.0208400618008419	-0.037398849119055	-0.0349339024847044	-0.117772362949014
Sned1	grey	grey	-0.0363287420889318	-0.0339204698057136	-0.029139522708907	0.000906840393112294	0.0855907733798753	0.043075800558392
Rpl23	grey	grey	0.205934660518731	0.625053804062919	0.285116308918968	-0.234362571867062	-0.293371429651888	-0.327706025349266
Frmd6	M4	turquoise	0.0902172570287672	0.267755774613336	0.100248898881776	-0.0986503584332296	-0.13709770176962	-0.194368420026945
Frzb	M2	yellow	0.0618989008936758	0.224853217239133	0.0191911796005347	-0.0845567012031242	-0.0221159732258111	-0.186466971500531
Bmyc	grey	grey	0.0277216126206358	0.096915055800055	0.00228920253343267	-0.0758140075630495	-0.0116666688983939	-0.0266435036968984
Chrdl1	M3	blue	-0.0107481661405575	-0.0407483648241259	-0.051250282544974	-0.106234956377448	0.0489438169101268	0.137671949095084
Tenm3	M4	turquoise	-0.028114234670367	0.194499141274505	0.0705176083344263	-0.0915411870759789	-0.0391686023009207	-0.173063859982792
Brca2	grey	grey	0.00611449676109234	0.0267336991669133	0.0231052643754207	-0.0166620308768409	0.00878679064074125	-0.0121065839677341
Nt5e	M3	blue	0.0204175944507273	0.122136387757196	0.0930333425454088	-0.0720966543468207	-0.128137425385977	-0.0765608798824083
Adamts19	M2	yellow	-0.000513385975814431	0.11752202093206	0.0496680225701641	-0.024046515310138	-0.0401240780009671	-0.12579027960672
Ddah1	M3	blue	-0.0383595518693234	-0.00893448577011472	0.0321882925299729	-0.0274191497115411	0.0164427112549561	0.0840329009233049
Gm10643	M5	brown	-0.0143744993314065	-0.0194297208814758	-0.0155887744263901	0.0202012956138131	0.0141547012836844	-0.00611458625654544
Zbtb7c	M4	turquoise	0.00844192013352937	0.130499158807169	0.0439995608699336	-0.0562379949526063	-0.0395378320876127	-0.150011182379227
Wdr53	M1	green	0.118185444636773	0.0603015004738174	0.00716841391918723	-0.00306333735303565	0.002900565912763	0.0137520575288874
Bace2	M4	turquoise	-0.0207073830698864	0.167361272106831	0.137953343244892	-0.0538013789316927	-0.0338421250662773	-0.132040120366852
Knop1	grey	grey	0.00583076931533357	0.0768878766237499	0.0187280608611859	-0.0164381996033446	-0.0363991007144306	-0.0418865725439438
Gpx7	grey	grey	-0.0363279714869916	0.208740789237963	0.0815376013737878	-0.0723292766888419	-0.109899600730258	-0.123597622572393
Nuak1	M5	brown	0.0234446898320932	-0.130542866839379	-0.116689206572289	-0.0334530615474906	0.102977998290193	0.264869940520638
Tmem47	grey	grey	0.0243218829744382	0.157142483326674	0.0656837652916585	-0.103439086596295	-0.0679669158203338	-0.067047233891458
AC166172.1	M5	brown	0.0420991883969709	-0.0152062588414864	-0.00441799156826405	-0.0226839044272793	0.00864016308665856	0.050811027692884
Gpc4	grey	grey	0.0132998310745152	0.193372269664561	0.0736605339463972	-0.0667016379886031	-0.0637544599495257	-0.176077322564786
Abcb1b	grey	grey	0.107848387549062	0.176779655440291	0.125401489520511	-0.0287879214364037	-0.117237837089872	-0.132793929737684
Steap4	grey	grey	0.0341467408729748	0.166980894187826	0.0547522802764468	0.0261686159617171	-0.104181848457286	-0.155173755673222
S100a11	grey	grey	0.065704617394699	0.355999562194584	0.100715056419294	-0.168190125634262	-0.129064060017075	-0.178420163339993
Tln2	grey	grey	0.0478550161826699	0.171920910561415	0.147748660426328	-0.0680110856028029	-0.193738436668228	-0.171489114530213
Fmnl3	grey	grey	0.0794865863545517	0.101639859971558	0.0347417283052234	-0.0899938903085602	-0.0290366010076702	-0.0135384031106923
Gna13	grey	grey	0.230177940433844	0.285947275531632	0.0749544318297195	-0.104222549006388	-0.128341235168238	-0.0937860710518592
Arl4a	grey	grey	0.100824136885407	0.261976709178688	0.0907242078066572	-0.0819749263920085	-0.0938297869114177	-0.124733038628561
Emp3	M4	turquoise	-0.00881799257355383	0.32392831202348	0.0926759588263258	-0.16176615959142	-0.102458317800903	-0.174632240318224
Uvssa	M5	brown	0.0517599838160535	-0.0240184389880749	-0.0168560955190867	-0.0118473740713286	0.0346114140740327	0.0919681684923479
Plec	grey	grey	0.0746448013304973	0.285597597939012	0.106081689721244	-0.124930815711318	-0.0788742367994349	-0.116628672701275
Ier5l	M1	green	0.214371966045226	0.177265412199887	0.0669790748979576	-0.0283067559257011	-0.110682061926437	-0.0657108169577164
Matn4	M1	green	0.205141776120447	0.0776849399630452	-0.00272900981370548	-0.0547846875875386	-0.0251575796628424	0.0777112279850519
Zbtb2	grey	grey	0.153905782012138	0.17349402742057	0.0514421488871369	-0.0981552004153295	-0.0291210111582937	-0.0546172329329226
Cdkn2c	M5	brown	-0.0561843437813217	-0.23866871010369	-0.145877110474406	-0.106831246199992	0.23193007460872	0.396962333027864
Uaca	grey	grey	0.105031855117908	0.0847393188119923	0.0319732902420374	-0.0659506420877479	-0.0167993977744797	0.00637286075953544
Nucb2	M4	turquoise	-0.0040562143009746	0.339312991416405	0.154327239198941	-0.0558603337236528	-0.147281308064519	-0.300647996252506
Tmem150c	grey	grey	-0.00207014326872707	0.037723870344455	0.033782481430699	0.0296658366572515	-0.086656506303166	-0.0418027013379232
Foxc2	grey	grey	0.0344187567993682	0.154751746041924	0.0722007742109945	-0.0622921758721825	-0.0819573894786532	-0.130401907591539
Zfp286	grey	grey	0.0117148482071588	0.0765621572274207	0.00988727226110949	-0.0661231332976543	-0.0466155216191196	-0.0482518944989957
Cask	grey	grey	0.017815429529671	0.136229067091606	0.0323283795349932	-0.0644095767944457	-0.0482871359556594	-0.0949666728054826
Ptger4	grey	grey	0.0861986941649105	0.189433350844564	0.05067579534109	-0.00120818506751832	-0.102418490589571	-0.149426590704694
Nkd1	M3	blue	0.0991892403980991	0.136191431887539	0.178839794539199	-0.1112966706094	-0.102979514703294	-0.00526989111967405
Cxcl16	grey	grey	0.0146241598803117	0.256624248205885	0.160172249636466	-0.0451161528843591	-0.141834668730861	-0.223054113287315
Plod2	grey	grey	0.0525926900473994	0.12066718317135	-0.0146043844578515	-0.0761898575483684	-0.0007685438999533	0.00208668141160039
Samd9l	grey	grey	-0.0518821936093982	0.011943089058812	-0.0165061689666489	-0.0208965221884821	-0.00575436139325584	-0.0048382514050289
Larp4b	M3	blue	-0.0283044101874938	0.0262605923636033	0.00834024676825746	-0.0773328208897791	-0.0193584961926504	0.0326667032912979
Colq	M5	brown	-0.0612684976222788	-0.234346000497925	-0.134504347127877	-0.0609061759861015	0.170216232536197	0.381213384963097
Timm8a1	grey	grey	0.0271029562448534	0.0801722528075148	0.0411058098838001	-0.049462579002406	-0.0241064248306577	-0.00374862861965286
Cyp7b1	grey	grey	0.0612779399976963	0.115525594281177	0.0414764199034067	0.0495015702389504	-0.144317899323201	-0.0798044167200332
Srebf2	grey	grey	0.0424578985851355	0.148814795082636	0.103229213819952	-0.0570099711700617	-0.0917131908571681	-0.108326361397002
Nckap5	M5	brown	0.0289533769571608	-0.0653233801405245	-0.0338683031050377	-0.0236349710531568	0.100767405170901	0.210924419559339
Mme	M5	brown	-0.00452986175443614	-0.127398327353616	-0.128799696801082	-0.0420393558562324	0.105224995059125	0.326500950575224
Ptprn	M3	blue	-0.0301163383619954	0.00625222717212042	0.00296419824145889	-0.0633804778850433	0.0108340243096399	0.0400009477462808
C430014B12Rik	grey	grey	0.0383357859182004	0.0364918249992366	-0.0106444924779689	0.0204328079878436	0.00500924823768876	-0.0126351361829669
Agbl2	M1	green	0.0297627880962011	-0.0163952699266964	-0.0037691325008017	0.0532085539706635	0.0389407866955535	0.0242336633235703
Gm15234	grey	grey	0.0398989976959985	-1.09354312415629e-05	0.0351098046630262	0.0422970483872669	-0.022665004060821	0.0195895580888325
AI854703	M5	brown	-0.0134321868991654	-0.0147715637088364	-0.000369980595765365	-0.0516608414114246	0.00546620516346195	0.026082180601936
Myrip	M3	blue	0.0797611114252354	0.0961607091912362	0.0826566865947636	-0.0354588848796969	-0.0208766470952338	-0.0334185166115382
Zfp873	grey	grey	-0.026854986846833	0.0123833121293362	0.0558094551518104	-0.00666968654142484	-0.0137211539304127	-0.0114554679755022
Tnfrsf11b	M2	yellow	0.0369488278235393	0.106868077867707	-0.00814054295858061	-0.0803268569773198	0.00366139232432514	-0.0847930025476332
Spdya	grey	grey	0.0123659405595804	-0.0131078775620746	-0.0246884934646727	-0.00368644914349049	0.0258873730976277	-0.00668097789647114
Gm38115	grey	grey	-0.0259254761024399	0.00124999705602045	-0.00707315252674932	0.00589448002171272	0.0352403420259756	-0.0296045955427394
6030407O03Rik	grey	grey	0.0290884697377909	0.060220998676044	0.0308267280628971	0.00547628150636339	-0.0338318393697859	-0.0254005934109132
Pask	grey	grey	0.00304474844924207	0.0500846060487827	0.00945195434324693	-0.0128795925592801	-0.0243052771020751	-0.0497012455962521
2600006K01Rik	grey	grey	-0.0187810265904259	0.0887764126898114	0.0193560317566768	-0.0126381832711513	-0.0485443488107434	-0.0674318300651536
Neb	grey	grey	0.0621349756542693	0.0376038178135773	0.0855371710245614	-0.0718478755688073	-0.00761001115997214	0.0135825320680138
Zfp967	grey	grey	-0.0189532601574367	0.000328008270059213	-0.0187565709912621	-0.0094445753579831	-0.00882673293710512	0.0189604807855662
Dapp1	M3	blue	-0.0176158662412892	0.0548157003479105	0.072704727315018	-0.0229743017319951	-0.0345623664719279	-0.00810120005010759
Adam22	grey	grey	-0.0181728792057516	0.0709347177449357	0.0426697318720806	-0.0242045565480202	-0.0480437374903154	-0.0886954849245043
Gm6116	grey	grey	0.0139097001105782	0.0428665830421671	-0.0109456212015374	0.00154513491744505	-0.00781110100931868	-0.0311568628080514
Oas1a	grey	grey	0.0549085429707024	0.0700449707574517	0.000648214933454897	-0.0271800554067382	-0.0235805976098955	-0.0225693089360029
Gm42829	M1	green	0.0298130599437639	-0.00235899093232683	-0.030669158457312	-0.0199836386689476	-0.00725376702896646	0.0159828319927333
Gpc2	M5	brown	0.00380454002379655	-0.015377174848494	-0.00269219109948231	-0.00556493700560635	0.016664660050732	0.0380106530558162
Cadps2	grey	grey	0.0431600017557371	0.0462731415722065	0.0419258902759533	-0.0515531086406541	-0.0204203446170959	-0.0175367346835629
Ccdc136	grey	grey	0.00144132220209065	0.0474202574667918	-0.00234745986444793	-0.00664461816537989	-0.0500389480212329	-0.0346731204999182
Slc2a3	grey	grey	0.0826169096026009	0.0907041568734752	0.0414784239595071	-0.0487847524827493	-0.0716663996369243	-0.070476445692748
Isoc2a	M5	brown	-0.0165441356000272	0.00171287424110833	0.0644529755352523	0.0262836773798452	-0.0459407684678318	0.0150329009749036
Ckm	M3	blue	-0.0318623474413329	0.00452290476030141	-0.0170371624269392	0.0270924486371085	0.00230168200184759	-0.00925657002098892
Cemip	grey	grey	0.0253674876068676	0.0448410255013598	-0.0177404912389301	-0.031759004152439	-0.0288101119808815	-0.00577649923790116
Hbb-bt	grey	grey	0.0216864074090574	-0.00414818233793579	0.0182264058094189	-0.0722869813054878	0.0399487121303687	0.0168643509531313
Prag1	grey	grey	0.0403468712439969	0.0629993420010809	0.0320758377834845	-0.0376549739465509	-0.0604200867044634	-0.0574530700409919
Il27ra	grey	grey	-0.0585346508576297	0.00551867370020739	-0.00800797025568112	-0.000803090801996811	0.00727048812852216	-0.0201246292633794
4930578M07Rik	grey	grey	-0.00476462022291608	-0.0225536283092838	-0.0471537267839724	-0.0283217473967254	0.0279304962374899	0.0163230233966933
Casp1	grey	grey	0.043841807866828	0.0722423695503279	0.0266960215274342	0.00318067013343462	-0.045096869518397	-0.0617907508776405
St14	grey	grey	0.0109722726519301	0.0574842393091935	0.00305336936401404	-0.0383132506172338	-0.0310736731578814	-0.0390744773776258
Avpr1a	M2	yellow	-0.0142107154190043	0.0866629393573518	-0.00811883625108087	-0.0516488348881817	-0.0344078453255334	-0.0673852667650236
4933427D14Rik	grey	grey	-0.0273757970961006	-0.0031368569810513	-0.0327594743050656	-0.0234098836177443	-0.0164098847097029	0.0123420330366639
Zfp184	grey	grey	0.0206504193484091	-0.00051630536012478	0.00413621680279082	0.0126794135588486	-0.0273796005311415	0.0166297637615038
BB123696	M1	green	0.0600744481663955	0.0120137160963942	0.0208629389250504	-0.0156546793546557	0.00547834010145525	0.023538233058983
Gm17108	grey	grey	-0.0175149553941571	-0.0034819293593341	-0.0329090320326357	0.00222218433738908	0.0418750230291466	0.0140708280109953
Sncg	grey	grey	-0.0193987208275112	0.0815545421506827	0.0933797384374193	-0.0143258364357575	-0.0572406517477254	-0.0869148425811956
Gm27017	M3	blue	0.00480956669875659	-0.0255896195633113	-0.0171288455772234	-0.0650072425142326	0.0149174554563498	0.0175420516577608
1700001G11Rik	M1	green	0.0697111055382274	0.0318921468412518	0.0196676699745764	0.0127457871713349	-0.0170457982124799	0.0176667267639993
Gm10785	grey	grey	0.00189696257109608	0.059301005287348	0.0566041747906114	-0.0626437690352199	-0.0134224797949187	-0.0566741371365521
Gm10544	grey	grey	-0.0805169364565221	-0.0269645463755821	0.0206207877454931	-0.0294641419350839	0.0121188290055849	0.0030273279358806
Pcdhb15	M1	green	0.028417961367549	0.00592474356037779	-0.017584217294015	0.00635585075381422	-0.0201566539176001	0.0217971308701832
Trpm3	grey	grey	0.00617232985702242	0.0750488110744018	0.00653632309327863	-0.00163227681705108	-0.06981029425849	-0.0494885364671699
Ifit1bl2	M5	brown	0.0127164484049264	-0.0128730410092822	0.0144322330942366	0.041909149277741	-0.0309485449053109	0.010772815345152
Kif20b	grey	grey	0.0286628258841051	0.0665587850640865	0.0206534232551623	-0.0564622415859763	-0.0301141745060659	-0.027490117085272
Acsl1	M5	brown	0.0195757361879135	-0.0753850252364385	-0.0451498025222904	-0.00892401457906016	0.0850696144234172	0.120802578555185
Adamts8	M5	brown	0.0322259735413396	-0.0145757485398796	-0.0121930727661211	0.00689892906365888	-0.0350651284595047	0.116691499730537
Nmt2	M5	brown	0.0183698970217785	0.0507599655325052	0.0108244126935404	-0.0459940676659993	0.0360127495140037	0.0174373117893292
Pkdcc	M2	yellow	0.0454836488503469	0.151991419252597	0.0802811595212919	-0.0635104956577334	-0.10034668730364	-0.124093630926038
Afap1l1	M3	blue	-0.00835297662696849	0.0366457929660102	0.0341131693861494	-0.081870290455859	-0.0204495926029524	0.103142084308768
Zfyve26	M3	blue	0.0261511146745254	-0.0068914163718014	-0.0420208627819192	-0.0932291608653292	0.0281178512875961	0.0835810609758671
Adgrl2	M3	blue	0.069854380687787	0.232021264260435	0.130528107614803	-0.0901803864304723	-0.12360160562061	-0.103454402174156
Tmem52	grey	grey	0.0026847605910797	0.0328880851955008	0.0185431556348051	-0.0324342339291293	0.029616213316282	-0.0271472639400124
Clba1	M3	blue	-0.0204235932758994	0.0356434964339455	0.0521737180370817	-0.0668271441216854	-0.0104311228581413	0.00659100587522166
Scnn1a	M3	blue	-0.0457838028571421	-0.0315945190366826	0.0177631795274383	-0.0899825223749285	0.0350743828182746	0.066443877992102
Pcdh9	grey	grey	0.0456709459675292	0.167732007500655	0.123831482301041	-0.0517945972799766	-0.12226743436019	-0.160635550028625
Katnal1	grey	grey	0.00685919234432066	0.0365027241307332	-0.0113480770028234	-0.00939385017559924	-0.0656154013216599	0.00639102411601515
Mup5	M3	blue	0.001922673013089	-0.00439763178638473	0.0016664781368803	-0.0621933307372336	0.00864939523397156	0.018086878802273
Ppp1r1b	M2	yellow	-0.00349508064695957	0.0448557257633717	-0.00409787435413441	-0.0319038572247204	-0.0475985182540515	-0.0441947179015852
Tbxa2r	grey	grey	-0.019740347472208	0.147410373371787	0.0557971576224258	-0.00997690534872993	-0.0653807624474688	-0.13373724731066
Rerg	grey	grey	0.0257670534801052	0.159880442472762	0.0871078349967845	-0.0629137526692548	-0.0802693120576515	-0.124886950734671
Arl5c	grey	grey	0.0586958597402822	0.108868883688435	0.0611226215123063	-0.062078119255501	-0.0422933053909757	-0.0766189459642796
Pla2g5	M2	yellow	-0.00429294603263486	0.0450882197650261	-0.00413790433269382	-0.0241156125369565	-0.0412487763934314	-0.0450518775127272
Lrrfip1	M3	blue	-0.0102783043171644	0.0997765117621522	0.0369833554387533	-0.133005236574079	-0.0482272604815425	-0.0342011080427256
Slc20a1	M1	green	0.148148009120496	0.092415047943301	-0.0293080621173752	-0.0408738566685136	-0.0353251480531493	0.0105678407406777
Fnbp1l	M3	blue	0.0109111879466823	0.0859370075979291	0.0862111437183571	-0.120331215495202	-0.0368573502341449	0.0330697720023645
Bmp7	grey	grey	-0.0624373876091845	0.0652028108890809	0.0368778014910919	-0.029066302208873	-0.0287290210726828	-0.012673220634401
Exoc1	grey	grey	0.0678203988965391	0.0566297170927021	0.0276384010405936	-0.0316892166356157	-0.00864845735081018	-0.0230586601504158
Tbl3	M1	green	0.145410812583022	0.0747628611004721	0.0161266584825187	0.000924959101493435	-0.00393752311471721	0.0238002584413944
Pamr1	grey	grey	0.0760014687153717	0.324919807178191	0.147813364923753	-0.0303648521796903	-0.258225411552015	-0.241291249262566
Fap	M2	yellow	-0.0500600374712542	0.187782878738926	0.0399940589581199	-0.0667895592530341	-0.0575651625358867	-0.199446695017031
Sde2	M1	green	0.213835022395711	0.182432694581621	0.0535002872828644	-0.0959401967983522	-0.0680304219390816	-0.0479273618711333
Arhgap29	grey	grey	-0.0094579101893179	0.0849757850536401	0.0459158699766904	-0.0659099344483468	-0.0573616381883648	-0.0162541750843776
Mars2	grey	grey	0.0286176661880692	0.037021394639855	-0.00981645977360802	0.0558549988214832	-0.0162500451407058	-0.00373957363981886
AW011738	grey	grey	0.0162968061944471	0.00528424830199355	-0.0192473062202112	0.0139535383109277	0.0263440548145479	-0.00061320488547419
Gabrb1	grey	grey	-0.0489435954998941	-0.0267257713913626	0.00267836038967609	0.0210442250622215	-0.0317998693121444	0.011855368597439
Rpl12	grey	grey	0.185658035694345	0.463429666012377	0.14513468891995	-0.218126408197063	-0.169046660800621	-0.174262069948951
Hexb	M4	turquoise	0.00625603301433466	0.309494932988199	0.135778702164293	-0.0456072652544922	-0.124805792347277	-0.264168789016456
Nrcam	M5	brown	-0.00585792800908634	-0.0204176280842318	0.00235172348215611	-0.0205949272532352	0.00321399228130364	0.0991278569587028
Pitpnc1	M3	blue	0.106754185760791	0.0902290953768076	0.0569048946038321	-0.08107895133962	-0.00686876814695428	0.0783407373458346
Angptl2	grey	grey	0.0123499148246016	0.212878833831702	0.0318908645544562	-0.151487343681459	-0.0330511935298538	-0.11676930917831
Hipk2	M3	blue	-0.000988242529240051	0.00279372452771826	0.0331744813375978	-0.113510580666492	-0.000483207684500107	0.134414033681689
Dcun1d3	grey	grey	0.121640877990794	0.0973673900047335	0.012094940453225	-0.00194362904314264	-0.00248635840225535	-0.0120929411389495
Hic1	grey	grey	0.0232841297048905	0.10409733640402	0.0134147058640708	-0.0642722834429492	0.00381987134727765	-0.0385653067327264
Tmed3	M4	turquoise	-0.0455073482604747	0.33902991922227	0.13676394487662	-0.0931621887403181	-0.0671171224001975	-0.273379994088227
Senp2	M5	brown	0.20826890955048	0.0333555032692698	-0.0378181244796389	-0.0495534448930628	0.0499416045604995	0.136037525436041
Ppp1r15b	grey	grey	0.110669815113086	0.175822053420384	0.0184152939070862	-0.0370731550334869	-0.0368233100070231	-0.083261696320303
Zfp318	M3	blue	0.0869251440083635	0.0640425481962028	-0.000166023748368459	-0.0451818618316999	-0.0381595600969401	0.0117865211097067
Magi3	M3	blue	-0.029344111329925	0.0476400549283373	0.0621861921220166	-0.0948702621484469	0.00988188758726295	0.0476356793092308
St8sia2	grey	grey	-0.0224130885033193	0.124131568662319	0.0675644913000384	-0.0746803877630752	-0.0752248687114661	-0.0891351718833534
Wwc1	M3	blue	-0.0185424153484868	-0.012651565442464	0.0427903662361893	-0.156472193115233	0.0301421334828428	0.113448823912402
Lmo7	M3	blue	-0.0271419441190685	0.0159348460729194	0.0689378254604357	-0.0709583822984817	-0.0110031601923024	0.0798707881116374
Taf1	M3	blue	0.0451388622162663	0.0945964587986482	0.0542540538085972	-0.0704909355904804	-0.00845805798575947	0.00283237995262342
Lurap1l	grey	grey	-0.0271275164855402	0.189612010371635	0.0397033695168089	-0.0714971498766072	-0.0521615149275799	-0.135455922077657
Ccdc85a	M3	blue	0.0192352845497089	0.061179961377787	0.0857512237398002	-0.0691059273753266	-0.00275500827526302	0.0554686179214623
Adamtsl4	grey	grey	-0.0097429805013585	0.179528871437658	0.0782568648789753	-0.115024465427699	-0.0607222323339277	-0.145615654707111
Cd3eap	grey	grey	-0.000555847965743558	0.109055238433142	-0.004434963892038	-0.0787956586542422	-0.0514674850103499	-0.0328489310393818
Pik3c2g	M5	brown	-0.00989485495067641	-0.059632623906533	-0.0145961789408533	0.0111406465093812	0.00957631042965168	0.0898088261229645
Irx3	M3	blue	0.0767331508155723	0.0940795263786189	0.0280851975394511	-0.0143206883166524	-0.0628961909372534	-0.0403014221229597
Gm48089	M3	blue	0.0455676740034186	0.044911242113928	-0.0012507010911804	-0.0293311243720087	-0.0509185212858739	0.0233213096713789
Smim5	grey	grey	-0.0302030855032885	0.0427553654013938	0.0281125698802281	-0.01299536149639	0.00516265571971677	-0.0341708865198859
Skp2	M3	blue	0.00444403179148912	0.0417758354299599	0.0428306049071618	-0.0431682111422428	0.000641209049510361	0.0112431468753072
Nptxr	grey	grey	0.00766166953845494	0.0945649547045945	0.0487837909798928	-0.0036954696655908	-0.0422526644494023	-0.0765220250166417
Mdga1	M3	blue	0.0530249802540194	0.0349064494282282	0.0162372500503996	-0.0297434653047174	-0.042297668014075	-0.00317886686580629
Aplnr	M3	blue	0.0577849917840056	0.0777398164929479	0.066206486771922	-0.0197566386402434	-0.050309003782097	0.00284618954109321
Fras1	M5	brown	0.00851336928179204	-0.0221269111498065	-0.0322039842239858	0.00475619110194528	0.0282021656847626	0.0558355653828331
Mcph1	grey	grey	-0.0160372267326602	-0.0105147841880242	-0.0278917177404842	-0.0137341549557579	0.0143234803261524	0.020047081512163
Atp8b1	M4	turquoise	0.0647213646085337	0.269065097605668	0.0878789970855168	-0.0620063795166835	-0.101474313029065	-0.19463423730802
Klf3	grey	grey	0.0177201555257281	0.191017948644946	0.086774567314906	-0.0492782678339825	-0.0279185266580182	-0.0740634558604861
Fam126b	M5	brown	-0.0144889347897046	-0.132826589669809	-0.0894245734279586	0.0372878123797523	0.15031896451987	0.208225432834312
Tsc22d1	M5	brown	0.0516927506782864	-0.120344357004378	-0.0721643232249926	-0.0625349536161186	0.170196281823923	0.334348995449444
Gyg	M5	brown	0.0163852496136789	-0.275257927378739	-0.19722841498321	-0.0573282337686338	0.206720342415773	0.520317315129814
Nedd9	M5	brown	0.138489715940663	0.0518758920776635	0.0124048664622064	-0.062165312851674	-0.0130072490105006	0.112858861292576
Pygl	M1	green	9.07432331862725e-05	0.0144453895495341	-0.0123765155612667	0.0499750180676575	-0.0411066399123312	0.0118247069943343
Uhmk1	M3	blue	-0.0298036471723886	-0.00802250401086361	0.046511186448991	-0.117617185082868	0.0257882177716999	0.0690215271576021
Rflnb	grey	grey	0.0159291845185133	0.137724639828298	0.0461232807213841	-0.134105144009442	-0.0802413261238934	-0.0585240113758074
Ank2	M4	turquoise	-0.00381910669001458	0.298115239827065	0.0969438883384306	-0.078076883280306	-0.13675736303892	-0.295570042560221
Mapk6	grey	grey	0.203483758521011	0.198458575263537	0.0723684446922475	-0.0552470015212531	-0.0044740339539674	-0.0841364454801223
Ldlr	M5	brown	0.0349898648277488	-0.0476929789153306	-0.0558144662512922	-0.0383273831084923	0.0995720144576469	0.132541636568834
Usp53	grey	grey	0.051414351707992	0.0287097244476048	0.00788654698709361	-0.0886794472161912	-0.00554847160971036	0.0274864033180514
Lepr	M5	brown	-0.0334871161778825	-0.0341561734256786	-0.0446855084417066	-0.0419341057715325	0.0311913077333084	0.11796574848551
Arhgap20	grey	grey	0.0326969474326353	0.134049550293585	0.0494230277784101	-0.0313503459047329	-0.0573113565476022	-0.0691079482409435
Naa50	grey	grey	0.143616221043319	0.251503652525883	0.0320329701322041	-0.132168175352855	-0.0556337568740495	-0.0948804670779978
Vegfc	M4	turquoise	0.0548319069682159	0.247659352607711	0.0815315997680124	-0.0243520481306145	-0.13068829752734	-0.225839118763806
Ptprj	grey	grey	0.0515689823247789	0.155269853468806	0.0703700236504309	-0.0771383975953898	-0.0530531814261531	-0.12599377954102
D430041D05Rik	grey	grey	-0.0198050402493832	0.125685574724467	0.0557720925690051	0.013572552971163	-0.109256822354979	-0.114001126557988
Haus8	grey	grey	0.0712646330466573	0.0751811153955034	0.00853807756702774	-0.0578151507900658	-0.0430393687810388	-0.00450647334811213
Mtx3	M5	brown	-0.029890966005074	-0.0237261763254133	-0.0214480087343233	-0.0407288480125055	0.0203418870538607	0.0628791157500569
Vldlr	grey	grey	-0.050973731411627	0.0412233164123682	-0.0104446070514138	-0.0800519285312004	0.0220110587017195	0.0448373706515995
Narf	M5	brown	-0.0564644790039864	0.0129136163945472	-0.0271084627721843	0.0126482550156191	-0.0323582122954035	0.00744265331072451
Cnr1	grey	grey	-0.0132113404935677	-0.0138638157162618	-0.0114474938663293	-0.0282686393953109	-0.0289388767214785	0.0138108085020827
Hsph1	M3	blue	0.062244405049416	0.0944806624210564	0.0400698878497652	-0.0823609060489515	0.0321518793113634	0.0652925395475458
Cdyl2	grey	grey	0.0558485974740311	0.0624448994643216	0.0493842601542124	-0.0211289448073257	-0.0512978445198779	0.0220759605449992
Gm35082	M3	blue	-0.0149961890227553	-0.0167441958267178	0.00245346061386765	-0.0215183647559146	-0.0396714843695675	0.0513022856446918
Ddx60	grey	grey	-0.00761929333097774	0.0581333579562497	0.0377287831164328	0.0202552180145815	-0.028878669211342	-0.0588745711155996
Il34	grey	grey	0.0393229210931803	0.0942747274506371	0.00340723070768128	-0.0337137660632383	-0.0266207469557546	-0.0667156702131101
Tbc1d22b	grey	grey	-0.00925982519578519	0.0135045008748636	-0.0086257853783383	-0.0405185964483833	-0.0121581452907608	-0.0064426041626198
Tlcd2	grey	grey	0.0597190680456236	0.0483635604732091	0.0285924536734196	-0.00508964508623432	0.0345562168284427	0.0323435952719023
Plxna2	M5	brown	0.0609449441897124	0.0190597018736634	0.00133904584794551	-0.00530317497986797	-0.0135276951315194	0.0570407925688772
Abcc1	grey	grey	-0.00892317689914462	0.136124135269323	0.0709178907215148	0.00840375511048533	-0.0648744807639791	-0.12424221478234
Gk	M5	brown	0.0399621409951081	-0.00102894883348703	-0.0284496494165978	0.00743922851260706	-0.0110265511012359	0.0793166243478916
Casp8ap2	grey	grey	0.0278109585034457	0.0450695798862112	0.016839503803138	-0.0299311645656781	0.0199183997073269	-0.000410182877684335
Stat1	M3	blue	0.0125034287138543	0.0351704856257511	0.011834271944672	-0.108004022230317	-0.00718923509325715	0.0528062145223396
Dcbld2	M2	yellow	0.0616956687566976	0.191460101915151	0.0770685534684412	-0.0715630625606936	-0.0476968605501407	-0.149242578436851
Il3ra	grey	grey	0.0272502190023969	0.0163223346843365	-0.014043359304534	-0.0927647868490097	0.021508950730907	0.0326020389240619
1500009L16Rik	grey	grey	0.0565868673603186	0.184707649232731	0.0906523991228956	-0.037028496090054	-0.149128866456044	-0.157127587705282
Dgkh	M5	brown	-0.00178619600592874	0.0796931148796259	0.0948772359884095	-0.0608995256189375	-0.0467814305757649	-0.0267710065995258
Sntb2	grey	grey	0.120470279587918	0.407708035555221	0.150208133283974	-0.123267673746303	-0.128636592174043	-0.289511212255184
C2cd2	grey	grey	-0.00969969013234508	0.0711176792152104	0.0520085417574994	0.00643815685006602	-0.0753284045993035	-0.0560066322882801
Tnfrsf23	M5	brown	0.0073352998598675	-0.0105939974195773	-0.00571400343188161	-0.0292194814648009	0.0114889371082953	0.0318311197330594
Gm10575	M5	brown	0.0472290141429353	-0.0279601476426538	0.00702644458146902	-0.00824481792506112	0.050069568429909	0.0732062923111044
D16Ertd472e	grey	grey	0.11433866522027	0.147355142779937	0.0373558548349127	-0.0574323248339636	-0.0751970463762728	-0.0501535112364411
2410006H16Rik	grey	grey	0.248025126885727	0.325906152561525	0.0897063530545845	-0.0892812744952862	-0.172863084516812	-0.162387734172335
Chst2	M5	brown	-0.0368864474832939	-0.143224083040572	-0.0981132164452176	-0.103044558591641	0.172831398303103	0.280558350690783
Eif2ak2	grey	grey	0.00068496472210559	0.0497034721538213	-0.0225875823182787	-0.00782548240924543	0.0471795775794857	0.0291453504822372
Aldh1a1	M5	brown	0.0412103074370484	-0.280075184433566	-0.20497006916423	-0.0372805411853898	0.257296219432743	0.501000240302063
Ets1	M3	blue	0.122715524322431	0.0273544455591021	-0.00115715783023636	-0.141878844394273	0.043743432568711	0.147756266611623
Ccnyl1	grey	grey	0.0699362689898837	0.0994598653098812	0.0209598190777019	-0.0401350380063051	-0.0615853821925077	-0.0468944544386327
Lmod1	M4	turquoise	0.0742107042406171	0.143075868783549	0.17655009191759	-0.111106722239375	-0.164592681920683	-0.15187614387789
5830408C22Rik	grey	grey	0.00371865267270518	-0.051731077352572	-0.0469725367606594	-0.0623209644720169	0.0227539953014655	0.0909382769869266
Spats2l	grey	grey	-0.00419287452924329	0.1642814014757	0.0606803097653065	-0.0837094674983207	-0.123114774981442	-0.0990201713480889
Nasp	M1	green	0.278161194603801	0.164018703562434	0.0223874772643556	-0.0278112796382009	-0.0187789272846751	-0.017060680028107
Rhoq	M4	turquoise	0.0193652267562367	0.278475441484277	0.100854588331367	-0.130101325651086	-0.0876479984083739	-0.22889877237758
Utrn	M3	blue	0.0273343304034616	0.106914486594081	0.104760948911133	-0.201022545970565	-0.0708772134632917	0.0294522354039929
Serpina3c	M5	brown	-0.0607327586561913	-0.209371372492439	-0.151465410341128	-0.0680559097584501	0.191234786111636	0.304593751266334
Wnt11	grey	grey	0.155284787696044	0.255884883166073	0.176251290266136	-0.10825175682045	-0.208622960855003	-0.204883008793094
Casp3	grey	grey	0.0744928199732965	0.0911413427486768	0.0182920593557219	-0.0680325980933999	-0.0454598347477514	-0.0412630918950678
Mgll	M5	brown	0.021287827254624	0.0038589372322921	0.0118768612352551	-0.123303692711305	0.0472356819510662	0.166346813977858
Ankrd17	grey	grey	0.0832343580764428	0.121071414209363	0.0133174488119057	-0.069387845245755	-0.0421339419087741	-0.0407403206231202
Trp53bp2	grey	grey	0.0948926179062856	0.09440255196173	0.0345760813747294	-0.0829724879054784	-0.0468922934190499	-0.0372190669127223
Alas1	M5	brown	-0.00666329547168995	-0.348943085844933	-0.271187691789602	0.0193056828674928	0.320448940110558	0.54854295505464
Samhd1	M1	green	0.0641162151954624	0.0924391364868628	0.0547761196131101	-0.0813048551715342	-0.079728321430823	0.0199488043335748
Gipc2	M3	blue	0.104640385937203	0.0115462292183506	0.0549622146719802	-0.0510923266978444	0.0143757632346118	0.0888642957294315
Klf10	M1	green	0.266487318111338	0.137864089066963	-0.027419797961275	-0.0883051958976428	-0.0144587036437998	0.0553149968860938
Fgfr1	M4	turquoise	0.0377572223223948	0.352641433812482	0.10748753636335	-0.117529215780332	-0.0824464814165795	-0.248464946103381
Pfkp	M4	turquoise	0.0795298544904657	0.282100574369549	0.210061906196604	-0.0733411194663565	-0.156704046323386	-0.243074820511121
Cmc2	grey	grey	0.0329970231929839	0.0680790620624803	0.0488380761932688	-0.064016473201721	-0.0281115608538234	-0.0136319813043689
Scube2	M5	brown	-0.0231438039608111	-0.306422339965791	-0.197326134481582	-0.0427895995346994	0.248681946538138	0.519615220613489
Camk1d	grey	grey	0.00566984761935288	0.0961808480062978	0.00337895546158086	-0.0673184086993403	0.0110187037493326	-0.0560397484004701
B230369F24Rik	M1	green	0.201253740231465	0.0212936382459677	-0.0139904323141315	-0.0623244451487678	0.0474585289487137	0.0965596580902466
Ston2	M4	turquoise	-0.0117899497717428	0.209019717083571	0.0703558848682341	-0.0281343309583807	-0.0501296916576904	-0.166150947680008
Atoh8	M3	blue	0.0704563239490014	0.0188145321047323	-0.00635274276660254	-0.0602157957590984	0.0232237863810453	0.0318680311369467
Rspo4	M5	brown	-0.00830154237094493	-0.0540449730751945	-0.0270454776537918	-0.0542014924718466	0.0229162004556266	0.097036987133659
Rcsd1	M3	blue	0.036810748557035	0.0883163890989524	0.101386766387259	-0.0412184909422226	-0.0378551351046621	-0.0104144534120523
Tifa	grey	grey	0.12451759968464	0.19066087456377	0.0963544934517566	-0.0725169655533781	-0.0816451809166385	-0.147206536800174
1700012D14Rik	M5	brown	-0.00218568511365436	-0.0382961403144326	-0.0259410465341312	-0.0358367318244909	0.0107530021421503	0.0407461835445475
Psmb8	grey	grey	0.0385380715527914	0.214626429151822	0.101663483729534	-0.129304566076001	-0.0673801469010772	-0.109784380652787
Prkar1b	grey	grey	0.077028937110933	0.10957217312155	0.0297435731081073	-0.0377366087896582	-0.0805516504088418	-0.0269527177053216
Srek1ip1	M3	blue	-0.046355224781232	0.000689273127911235	-0.0199191033291603	-0.0457181751731857	0.00785329986527452	0.0596243143201783
Lag3	grey	grey	0.1453257907636	0.184030675577511	0.190844962876705	-0.0450670804136855	-0.191196392435292	-0.154898377464164
Serpinb1a	M4	turquoise	-0.0858818956409581	0.229261783608838	0.1177296073273	-0.0552500149378618	-0.0568030209278767	-0.208335762213445
Dtna	M5	brown	-0.0647415613193741	-0.24929385616562	-0.109482724281843	-0.0192427273787745	0.200625282969911	0.343561951082841
Llph	M3	blue	0.0714446056446796	0.16950923100192	0.0678871729826557	-0.136969594410559	-0.0555666254295745	-0.051902604153778
Zfp36l2	grey	grey	0.304533092951933	0.318717934516489	0.132799246258138	-0.120172925546721	-0.135077515706002	-0.127710934787779
Txndc5	M4	turquoise	-0.0220037890268157	0.268281645448431	0.0925086883942362	-0.10778551873058	-0.0624844115748467	-0.165565418591932
Prodh	M5	brown	-0.00591421923018479	-0.105973507111104	-0.0386636886353551	-0.00697271678637345	0.109136362534299	0.191617208066738
Abl2	grey	grey	0.0674132366673441	0.157163899893002	0.0416658912353389	-0.0544621836335005	-0.0227917030866211	-0.100407719494626
Heatr5a	grey	grey	-0.032759396377678	0.132115588784894	0.0344073889027174	-0.045333378889689	0.000696383275588806	-0.120654359460324
Slc25a33	M1	green	0.118310694483698	0.0762465987883649	0.0666826205731833	-0.0517846352969922	-0.0998395649975079	0.000519811426520738
Dusp1	M5	brown	0.327072780835481	-0.0693211320295238	-0.128645479535643	0.0175972212615211	0.191605751452719	0.385324250552335
Rlim	M1	green	0.249761559717251	0.17367252766612	0.0514484763468976	-0.105166101216451	-0.0937196323842129	-0.00168014287831227
Mpp7	M5	brown	0.124587486306276	0.0732502244222019	-0.0034996261116008	-0.0402268601367667	-0.045726148657292	-0.00561012828499302
Mob3a	grey	grey	0.0443348659050436	0.0531621626807248	0.00514764339025084	-0.0434669068372852	0.00447398545213781	0.0475928239478774
Serpinb9	grey	grey	-0.0243300782518906	0.0675299696686877	0.0852365602746095	-0.0495802941125771	-0.0829431362354791	-0.0422767392895589
Zfp292	M5	brown	-0.0671582127716665	0.00457040210217519	0.0572058921841301	-0.04655123816155	-0.0117314631762364	0.026727157239454
Ttl	grey	grey	-0.00430961127183018	0.0602569196515611	-0.00209838632138162	-0.0373334574419962	0.012838057773993	-0.0261635857659825
Col6a3	grey	grey	0.0429686267476237	0.183637735448415	0.0124379536338783	-0.100491252346559	-0.0965056884796035	0.00434260465237595
Rps4x	grey	grey	0.185977850594654	0.523519521876183	0.229259939752875	-0.226946740473417	-0.215162269815036	-0.202533976995895
Irs2	M1	green	0.360530169532857	0.253863632216521	0.0921197764988336	-0.109076572339747	-0.181002061738029	-0.0762877421213826
Snai1	M5	brown	0.0946464457940531	0.0476113879217628	-0.0046952852263716	-0.0204809501275926	0.0410648297785809	0.0476656789412194
Nit1	M5	brown	0.0197804707854121	-0.00277789213723746	-0.0380421258928946	-0.0236404834657682	0.0206285685947988	0.0635005484560956
Filip1l	grey	grey	0.0326358039908755	0.229369656830419	0.158275605691888	-0.142879802798263	-0.248128798278697	-0.19380570836477
2810013P06Rik	M5	brown	0.0330585324809911	-0.0999205818378137	-0.0563260418181604	-0.00231089501395807	0.116061034414349	0.210825347315569
Slc35e4	grey	grey	0.0995802990672578	0.207152721835563	0.064915391416163	-0.0626336926147502	-0.0280275403344589	-0.108160036759241
Rac3	M5	brown	0.0128525053812282	-0.0296124069930373	-0.0355776097350726	-0.0152382376373896	0.0444119049628078	0.075469889500179
4933429H19Rik	M3	blue	0.00258146398506351	-0.0293914827482549	-0.0346081462605933	-0.00887581848893823	0.0399709900221305	0.047549059575165
Epha5	grey	grey	0.0222886819637751	0.120800174860425	0.0458672612215217	0.0623932368894424	-0.0458412964304441	-0.0993550406864095
Ngb	grey	grey	0.0105919399357212	0.0932099571502726	0.0723367096154368	-0.00649908105208356	-0.137740614668169	-0.120190419381429
Sept6	grey	grey	0.0264541268995838	0.107637013207305	0.02051829492952	-0.0746391256809156	-0.0930798613114193	-0.0808188128137768
Lrrc17	M4	turquoise	-0.0251279842611812	0.235090188744269	0.0457438458155815	-0.0646835954191334	-0.0761181304587193	-0.202714083769668
Nt5dc2	M5	brown	0.0551510871289608	-0.0974289039312469	-0.0713685794648484	-0.0354243479259515	0.0266363177096244	0.28583249263355
BC005561	M5	brown	-0.0153268637335016	0.0226529364413537	0.0138854113571861	-0.0585873493108382	-0.0185630345719822	0.012656348425955
Mdm2	grey	grey	0.196100638571669	0.173165834037449	0.0562257469869472	-0.0859092899190929	-0.0564243194171824	-0.0350771729753276
Ing2	M1	green	0.220755205959324	0.124496989784679	-0.0227528271812733	-0.0529639140841319	-0.0226050428966723	0.00372783210644178
Bvht	M3	blue	0.0482960630541607	0.126510860347998	0.0617138008583026	-0.0748520151648056	-0.041637812139705	-0.00795625546753224
Gm12022	M5	brown	0.00709861119022535	-0.042010975792518	-0.0801924969904555	-0.00399955207130679	0.0470900840617148	0.0739071982492287
Mfsd6	grey	grey	-0.023679746926734	0.124105090326187	0.0813876761025827	-0.0724386480565411	-0.0301412165729657	-0.0752771482479316
Serpinb6b	M3	blue	-0.0139195158002823	0.0247688996132107	0.0610655764732352	-0.108180782016071	-0.0259339838491815	0.0488755472737379
Sema3f	M3	blue	0.0639942118342964	0.109303943265903	0.114970471184468	-0.0515336452546142	-0.0617167983992425	0.00990534108792962
Phip	M5	brown	0.0749242527099626	0.0960944015670877	0.0238615031730382	-0.061940299701314	-0.0144909345389313	0.00352957755979677
Pls3	M4	turquoise	0.0578048041459126	0.290009149893088	0.148637483836282	-0.129780605725086	-0.130259220985394	-0.205131162037534
Col8a2	M5	brown	-0.0128858174701161	0.0133430502972194	-0.0320594691922907	-0.00192453688923015	-0.0227372986448707	-0.00803503170303653
Zfyve28	grey	grey	0.0531300102655624	0.0365023216615805	-0.0241615410880508	0.0411444197139328	-0.0457803087413259	-0.0228817727240171
Mpi	grey	grey	0.0175342960642112	0.029294303299734	-0.0223951984406499	0.0122776527017795	0.0115624872056866	-0.0159346649927694
Pcdhb5	M3	blue	-0.0329554517174503	-0.0133091206357355	-0.0282499394120051	-0.0171300416707644	-0.00139321105943969	0.0353818844069861
Adrb1	M3	blue	0.0900181912133344	0.0773030880519038	0.0791460771033865	-0.0379315556221923	-0.0389275734360821	0.029835157479694
Prkg2	M5	brown	-0.0110866244020256	-0.177454996344981	-0.10396379667261	-0.0482262387567187	0.157730459081336	0.298182217995935
AW551984	M4	turquoise	0.0243600024447753	0.142513031798886	0.0509217858186967	-0.0287717887389251	-0.0178493157077702	-0.109895792059949
Slamf8	grey	grey	0.0730759030573831	0.0426565100244153	0.0674840456728348	-0.0181217137309338	-0.0162069254653323	-0.0367078263156615
Gm42679	grey	grey	0.0751598505912832	0.13042134505459	0.0473835055432139	-0.0229086422875424	-0.0444826366578398	-0.123463579359217
Brinp1	grey	grey	0.0192877978106117	0.0207524640875949	0.00244753353241162	0.00513715507052513	-0.041309789218919	-0.0215123553317465
Mrvi1	grey	grey	-0.00605935846215605	0.0792052267570734	0.0555852256065287	-0.0429378394221428	-0.0646341168762036	-0.105894096057147
Slitrk6	M5	brown	-0.0346363765275482	-0.0576270577959418	-0.0467821290803672	0.0579941276434926	0.0297703091085297	0.0469502738048353
Pcdhb12	grey	grey	0.0195487187851255	-0.0113579863399108	0.028954457695893	0.00467230565898547	0.0227640276389115	0.00789940852742713
Gm45509	M1	green	0.0534526168431756	0.0202845850836082	-0.016665562193862	0.0464303695038932	-0.0026401010252438	0.00970894673384249
2900041M22Rik	M4	turquoise	0.00786978957131305	0.0963257587266611	0.0779721158885901	-0.0177896888946552	-0.0599536156663846	-0.104493161548765
Muc13	grey	grey	0.0974255871878624	0.0625178685747589	0.0376267671334157	0.0188586874331645	-0.013771204875	-0.0251785088577339
Gm26532	M1	green	0.172816809613	0.168263372651398	0.0641950401301377	-0.0553914100084826	-0.0715513845584242	-0.0840114219012822
Rps24	grey	grey	0.175380428883512	0.590432359594493	0.275724611534484	-0.271658157374728	-0.280393748613038	-0.297319998303399
Gpam	M5	brown	-0.0297336808851764	-0.065536031955222	-0.0612378122349432	-0.0356714746851332	-0.0252261635149229	0.142870920360854
Pcdhb17	grey	grey	-0.00781768935962115	0.0348684064209096	-0.00652938027784343	-0.0420131982458636	-0.00123014937186215	-0.00136892068249987
Phc3	M5	brown	-0.0499869327131291	-0.0536913032005295	-0.0291594624895421	-0.0149573995341682	0.0364148864223766	0.056035194813958
Elf1	grey	grey	0.11779072340112	0.218249772317861	0.0567525143229981	-0.163509767453285	-0.0953253703333915	-0.114729300328833
Dgkz	grey	grey	-0.0060835884779357	0.0945516583608461	0.042230468129141	-0.0140745354589913	-0.030041672999137	-0.0171912473017696
Pigz	grey	grey	0.0561490036929533	0.131256955616361	-0.000447862155881233	-0.033004538311455	-0.00533497746930812	-0.0768409476306764
Tfe3	M1	green	0.153123758925272	0.0528492162931757	-0.0403911733096566	-0.0540121480938385	0.0445428655622715	0.0476897043251099
Actg1	grey	grey	0.161116550000549	0.422307448999882	0.12266621163535	-0.208649267135392	-0.148859991100267	-0.0913021166561069
Kifc3	M5	brown	0.0408802373047752	-0.00353400032649257	-0.0346383763749008	0.0165256880409991	0.00172239621833377	0.064734062888903
Cyp51	grey	grey	-0.051182997267545	0.0745521884961447	0.0389777273754346	-0.047286920967388	-0.0555470949045658	-0.0340647804698899
Itpripl2	M3	blue	0.00634458964720085	0.0864648479166113	0.0511865038001101	-0.143885652724623	-0.0196396372376906	0.0296519105396516
Adrb2	M5	brown	0.0812131506006397	-0.0712534203912176	-0.0955254895196022	-0.0341872570723278	0.0655157416202298	0.19444182383746
Cdon	grey	grey	0.00718338051225479	0.150256439537856	0.0359590569779216	0.0283748322039832	-0.0315668182114571	-0.150914424272878
Lrrc8b	M3	blue	0.0255206837574877	0.0725667735768456	0.0504673209813502	-0.0651113456660786	-0.0412041095565605	0.00227295307787933
Slco2b1	M4	turquoise	0.0162642766235288	0.203033342788689	0.0760660217027455	-0.0602096124216512	-0.0736751066841976	-0.175177023454126
Mre11a	M5	brown	0.0125552159470206	-0.0219722464038023	-0.022041540843895	0.0242020355240458	0.0102657619769914	0.0558959556273439
Elac2	M5	brown	-0.000792714315948784	-0.00738209936609262	-0.0397597469763216	-0.00601082301343121	0.0217276865780617	0.0147499092177107
Ppm1d	M5	brown	0.0820381638245757	0.0582748114548673	-0.0204512977209147	-0.00111821162867812	0.000564517663481882	0.0151085821012239
Ccnl1	M1	green	0.472317326410986	0.324415173262678	0.0811601912584853	-0.132281560091993	-0.100354785021356	-0.0948549907847898
Wnt2	M5	brown	-0.0382008375386692	-0.286616270953113	-0.211333288165004	-0.0657659611075072	0.258658899083686	0.477633153104543
Ltbp4	M4	turquoise	-0.0535687891789064	0.360119019051119	0.113268660883752	-0.146312176851076	-0.174603065992522	-0.16954738358247
Lrrc20	M5	brown	-0.00543264843753762	-0.0111438125223045	-0.000956105044763387	-0.0177111257294812	-0.0240650868796341	0.0549796712525663
Fam124a	grey	grey	0.0178303017691234	0.14564570825524	0.00731645353100194	-0.00940698780541384	-0.11380686378309	-0.130011230380939
Slc7a6os	M5	brown	0.0524919406952787	-0.0241736341989853	-0.0613965040402876	-0.0747649349969926	0.053277574337762	0.109711507663492
Pde12	grey	grey	0.142689986413748	0.156780126035793	0.0834255757282566	-0.0816665877118909	-0.0497723918581979	-0.0723611304063382
