# Supplementary material for: Single-Cell Transcriptomic Profiles of Lung Pre-Metastatic Niche Reveal Neutrophil and Lymphatic Endothelial Cell Roles in Breast Cancer
Source: Cancers (Basel). 2022 Dec 28;15(1):176. doi: 10.3390/cancers15010176 (PMC9818165; doi:10.3390/cancers15010176)
Supplement: Supplementary file 1 [file cancers-15-00176-s001.zip › Table S20.xlsx]

## Sheet: M2_DAVID_PATHWA_KEGG
Category	Term	Count	%	PValue	-Log10(PValue)	Genes	List Total	Pop Hits	Pop Total	Fold Enrichment	Bonferroni	Benjamini	FDR
KEGG_PATHWAY	mmu04512:ECM-receptor interaction	12	8	5.71539e-11	10.243	COMP, VTN, COL2A1, CHAD, COL9A1, SPP1, COL6A6, COL9A3, COL6A5, COL9A2, THBS2, THBS4	71	88	8977	17.2414	7.25855e-09	7.25855e-09	7.14424e-09
KEGG_PATHWAY	mmu04974:Protein digestion and absorption	11	7.33333	9.05218e-09	8.04325	DPP4, COL2A1, COL5A3, COL11A1, COL11A2, COL9A1, COL8A1, COL6A6, COL9A3, COL6A5, COL9A2	71	108	8977	12.8778	1.14963e-06	5.74814e-07	5.65761e-07
KEGG_PATHWAY	mmu04510:Focal adhesion	12	8	3.67832e-07	6.43435	COMP, VTN, COL2A1, CHAD, COL9A1, SPP1, COL6A6, COL9A3, COL6A5, COL9A2, THBS2, THBS4	71	201	8977	7.54845	4.67136e-05	1.55716e-05	1.53263e-05
KEGG_PATHWAY	mmu04151:PI3K-Akt signaling pathway	13	8.66667	1.8206e-05	4.73979	NGFR, THBS2, THBS4, COMP, VTN, COL2A1, CHAD, COL9A1, SPP1, COL6A6, COL9A3, COL6A5, COL9A2	71	359	8977	4.57848	0.00230951	0.000502482	0.000494569
KEGG_PATHWAY	mmu05165:Human papillomavirus infection	13	8.66667	1.97828e-05	4.70371	FZD9, THBS2, THBS4, COMP, VTN, COL2A1, CHAD, COL9A1, SPP1, COL6A6, COL9A3, COL6A5, COL9A2	71	362	8977	4.54054	0.00250928	0.000502482	0.000494569
KEGG_PATHWAY	mmu04060:Cytokine-cytokine receptor interaction	10	6.66667	0.000410204	3.387	NGFR, CXCL9, CCL7, ACKR4, CSF2RB, TNFRSF11B, INHBA, CXCL13, CX3CL1, CCL21A	71	292	8977	4.33002	0.0507723	0.00868265	0.00854591
KEGG_PATHWAY	mmu04061:Viral protein interaction with cytokine and cytokine receptor	6	4	0.000839668	3.07589	CXCL9, CCL7, ACKR4, CXCL13, CX3CL1, CCL21A	71	95	8977	7.98547	0.101189	0.015234	0.0149941
KEGG_PATHWAY	mmu04610:Complement and coagulation cascades	4	2.66667	0.0357992	1.44613	VTN, SERPINA1B, PLAU, CLU	71	93	8977	5.43813	0.990244	0.568313	0.559363
KEGG_PATHWAY	mmu04062:Chemokine signaling pathway	5	3.33333	0.0625106	1.20405	CXCL9, CCL7, CXCL13, CX3CL1, CCL21A	71	192	8977	3.29262	0.999725	0.882094	0.868203
KEGG_PATHWAY	mmu05144:Malaria	3	2	0.0727217	1.13834	COMP, THBS2, THBS4	71	57	8977	6.65456	0.999932	0.923566	0.909022

## Sheet: 工作表1
mmu04512	ECM-receptor interaction
mmu04974	Protein digestion and absorption
mmu04510	Focal adhesion
mmu04151	PI3K-Akt signaling pathway
mmu05165	Human papillomavirus infection
mmu04060	Cytokine-cytokine receptor interaction
mmu04061	Viral protein interaction with cytokine and cytokine receptor
mmu04610	Complement and coagulation cascades
