# Supplementary material for: Single-Cell Transcriptomic Profiles of Lung Pre-Metastatic Niche Reveal Neutrophil and Lymphatic Endothelial Cell Roles in Breast Cancer
Source: Cancers (Basel). 2022 Dec 28;15(1):176. doi: 10.3390/cancers15010176 (PMC9818165; doi:10.3390/cancers15010176)
Supplement: Supplementary file 1 [file cancers-15-00176-s001.zip › Table S21.xlsx]

## Sheet: M3_DAVID_PATHWA_KEGG
Category	Term	Count	%	PValue	-Log10(PValue)	Genes	List Total	Pop Hits	Pop Total	Fold Enrichment	Bonferroni	Benjamini	FDR
KEGG_PATHWAY	mmu04514:Cell adhesion molecules	13	4.34783	6.48525e-06	5.18807	CADM1, ICAM2, F11R, H2-AA, CLDN5, CDH5, CDH1, H2-DMB1, PECAM1, CLDN18, ITGA6, ESAM, H2-AB1	129	174	8977	5.19919	0.00145165	0.000788067	0.000742331
KEGG_PATHWAY	mmu04640:Hematopoietic cell lineage	10	3.34448	7.03631e-06	5.15265	CD24A, H2-DMB1, ITGA1, KIT, ITGA2B, ITGA6, CD36, H2-AA, GP5, H2-AB1	129	94	8977	7.4031	0.0015749	0.000788067	0.000742331
KEGG_PATHWAY	mmu05200:Pathways in cancer	21	7.02341	7.79256e-05	4.10832	CDKN2B, EDN1, STAT1, EPAS1, ITGA2B, PDGFA, ADCY1, DLL1, ETS1, AGT, RASGRP3, DLL4, PLCB4, EDNRB, GNGT2, CCND1, CDH1, KIT, PMAIP1, ITGA6, SKP2	129	543	8977	2.69129	0.0173045	0.00581844	0.00548077
KEGG_PATHWAY	mmu04015:Rap1 signaling pathway	12	4.01338	0.000231171	3.63607	PLCB4, FLT1, CDH1, MAGI3, KIT, ITGA2B, KDR, ARAP3, PDGFA, ADCY1, TEK, RASGRP3	129	214	8977	3.9022	0.05047	0.0129455	0.0121942
KEGG_PATHWAY	mmu04270:Vascular smooth muscle contraction	9	3.01003	0.00102114	2.99092	RAMP2, EDN1, CALCRL, PLCB4, MYH14, MYH9, ADCY1, AGT, ACTG2	129	144	8977	4.34932	0.204553	0.0457469	0.043092
KEGG_PATHWAY	mmu05416:Viral myocarditis	7	2.34114	0.00155876	2.80722	CXADR, CCND1, CAV1, H2-DMB1, H2-AA, H2-AB1, MYH7	129	88	8977	5.5355	0.294914	0.0498804	0.0469855
KEGG_PATHWAY	mmu04658:Th1 and Th2 cell differentiation	7	2.34114	0.00155876	2.80722	DLL4, STAT1, H2-DMB1, GATA3, H2-AA, DLL1, H2-AB1	129	88	8977	5.5355	0.294914	0.0498804	0.0469855
KEGG_PATHWAY	mmu05410:Hypertrophic cardiomyopathy	7	2.34114	0.00185194	2.73237	EDN1, ACE, ITGA1, ITGA2B, ITGA6, AGT, MYH7	129	91	8977	5.35301	0.339804	0.0508038	0.0478554
KEGG_PATHWAY	mmu05414:Dilated cardiomyopathy	7	2.34114	0.00218516	2.66052	ITGA1, ITGA2B, ADRB1, ITGA6, ADCY1, AGT, MYH7	129	94	8977	5.18217	0.387381	0.0508038	0.0478554
KEGG_PATHWAY	mmu04510:Focal adhesion	10	3.34448	0.00226803	2.64435	FLT1, VWF, CCND1, CAV2, CAV1, ITGA1, ITGA2B, KDR, PDGFA, ITGA6	129	201	8977	3.46215	0.398672	0.0508038	0.0478554
KEGG_PATHWAY	mmu05418:Fluid shear stress and atherosclerosis	8	2.67559	0.00516086	2.28728	CDH5, EDN1, CAV2, CAV1, ITGA2B, PECAM1, KDR, PDGFA	129	148	8977	3.76158	0.686209	0.0966621	0.0910522
KEGG_PATHWAY	mmu05310:Asthma	4	1.33779	0.00517833	2.28581	FCER1G, H2-DMB1, H2-AA, H2-AB1	129	25	8977	11.1343	0.68744	0.0966621	0.0910522
KEGG_PATHWAY	mmu04540:Gap junction	6	2.00669	0.00755922	2.12152	PLCB4, TUBB1, PDGFA, ADRB1, ADCY1, TUBB4A	129	86	8977	4.85506	0.817261	0.126738	0.119383
KEGG_PATHWAY	mmu04512:ECM-receptor interaction	6	2.00669	0.0083144	2.08017	VWF, ITGA1, ITGA2B, ITGA6, CD36, GP5	129	88	8977	4.74471	0.845909	0.126738	0.119383
KEGG_PATHWAY	mmu04611:Platelet activation	7	2.34114	0.00848692	2.07125	VAMP8, PLCB4, FCER1G, VWF, ITGA2B, ADCY1, GP5	129	124	8977	3.92842	0.851799	0.126738	0.119383
KEGG_PATHWAY	mmu05321:Inflammatory bowel disease	5	1.67224	0.0116344	1.93426	STAT1, H2-DMB1, GATA3, H2-AA, H2-AB1	129	62	8977	5.61203	0.927298	0.162882	0.153429
KEGG_PATHWAY	mmu04933:AGE-RAGE signaling pathway in diabetic complications	6	2.00669	0.0145321	1.83767	EDN1, PLCB4, CCND1, STAT1, AGER, AGT	129	101	8977	4.13401	0.962337	0.191481	0.180369
KEGG_PATHWAY	mmu04659:Th17 cell differentiation	6	2.00669	0.0169413	1.77105	STAT1, H2-DMB1, AHR, GATA3, H2-AA, H2-AB1	129	105	8977	3.97652	0.978233	0.210825	0.198589
KEGG_PATHWAY	mmu04924:Renin secretion	5	1.67224	0.0229977	1.63832	EDN1, ACE, PLCB4, ADRB1, AGT	129	76	8977	4.57823	0.994547	0.27113	0.255395
KEGG_PATHWAY	mmu04670:Leukocyte transendothelial migration	6	2.00669	0.0265585	1.5758	CDH5, CLDN5, PECAM1, CLDN18, ESAM, F11R	129	118	8977	3.53843	0.997593	0.297455	0.280192
KEGG_PATHWAY	mmu04934:Cushing syndrome	7	2.34114	0.0281654	1.55028	SCARB1, CDKN2B, PLCB4, CCND1, ADCY1, AHR, AGT	129	162	8977	3.00694	0.998338	0.300431	0.282996
KEGG_PATHWAY	mmu04151:PI3K-Akt signaling pathway	11	3.67893	0.0321902	1.49228	GNGT2, FLT1, VWF, CCND1, ITGA1, KIT, ITGA2B, KDR, PDGFA, ITGA6, TEK	129	359	8977	2.13226	0.999344	0.320865	0.302244
KEGG_PATHWAY	mmu04970:Salivary secretion	5	1.67224	0.032946	1.4822	PLCB4, LYZ2, ADRB1, ADCY1, AQP5	129	85	8977	4.09348	0.999449	0.320865	0.302244
KEGG_PATHWAY	mmu05323:Rheumatoid arthritis	5	1.67224	0.0354496	1.45039	FLT1, H2-DMB1, TEK, H2-AA, H2-AB1	129	87	8977	3.99938	0.999692	0.330863	0.311661
KEGG_PATHWAY	mmu05222:Small cell lung cancer	5	1.67224	0.0436071	1.36044	CDKN2B, CCND1, ITGA2B, ITGA6, SKP2	129	93	8977	3.74135	0.999954	0.381181	0.359059
KEGG_PATHWAY	mmu04145:Phagosome	7	2.34114	0.0456328	1.34072	SCARB1, H2-DMB1, TUBB1, CD36, H2-AA, TUBB4A, H2-AB1	129	182	8977	2.67651	0.999971	0.381181	0.359059
KEGG_PATHWAY	mmu04371:Apelin signaling pathway	6	2.00669	0.045946	1.33775	GNGT2, PLCB4, CCND1, CDH1, APLNR, ADCY1	129	137	8977	3.0477	0.999973	0.381181	0.359059
KEGG_PATHWAY	mmu04014:Ras signaling pathway	8	2.67559	0.0478961	1.3197	GNGT2, FLT1, KIT, KDR, PDGFA, TEK, ETS1, RASGRP3	129	232	8977	2.39963	0.999983	0.383169	0.360931
KEGG_PATHWAY	mmu04916:Melanogenesis	5	1.67224	0.0543505	1.2648	EDN1, EDNRB, PLCB4, KIT, ADCY1	129	100	8977	3.47946	0.999996	0.419811	0.395447
KEGG_PATHWAY	mmu04062:Chemokine signaling pathway	7	2.34114	0.0564455	1.24837	HCK, GNGT2, PLCB4, STAT1, ADCY1, PPBP, PF4	129	192	8977	2.5371	0.999998	0.42146	0.397
KEGG_PATHWAY	mmu04072:Phospholipase D signaling pathway	6	2.00669	0.0616334	1.21018	PLCB4, FCER1G, KIT, PDGFA, ADCY1, AGT	129	149	8977	2.80225	0.999999	0.445351	0.419505
KEGG_PATHWAY	mmu05145:Toxoplasmosis	5	1.67224	0.0719574	1.14292	STAT1, H2-DMB1, ITGA6, H2-AA, H2-AB1	129	110	8977	3.16314	1	0.498546	0.469612
KEGG_PATHWAY	mmu04390:Hippo signaling pathway	6	2.00669	0.0735881	1.13319	TEAD4, CCND1, CDH1, WWC1, BMP6, NKD1	129	157	8977	2.65946	1	0.498546	0.469612
KEGG_PATHWAY	mmu04940:Type I diabetes mellitus	4	1.33779	0.0778978	1.10847	H2-DMB1, PTPRN, H2-AA, H2-AB1	129	70	8977	3.97652	1	0.498546	0.469612
KEGG_PATHWAY	mmu05140:Leishmaniasis	4	1.33779	0.0778978	1.10847	STAT1, H2-DMB1, H2-AA, H2-AB1	129	70	8977	3.97652	1	0.498546	0.469612
KEGG_PATHWAY	mmu05415:Diabetic cardiomyopathy	7	2.34114	0.0809264	1.09191	ACE, PLCB4, COX4I2, CD36, AGER, AGT, MT-ATP8	129	211	8977	2.30864	1	0.503542	0.474318
KEGG_PATHWAY	mmu04927:Cortisol synthesis and secretion	4	1.33779	0.0831873	1.07994	SCARB1, PLCB4, ADCY1, AGT	129	72	8977	3.86606	1	0.50362	0.474392
KEGG_PATHWAY	mmu04530:Tight junction	6	2.00669	0.0901873	1.04485	CLDN5, CCND1, MYH14, CLDN18, MYH9, F11R	129	167	8977	2.50021	1	0.531631	0.500777
KEGG_PATHWAY	mmu04810:Regulation of actin cytoskeleton	7	2.34114	0.0943157	1.02542	DIAPH3, ITGA1, ITGA2B, MYH14, PDGFA, MYH9, ITGA6	129	220	8977	2.2142	1	0.541711	0.510272

## Sheet: 工作表1
mmu04514	Cell adhesion molecules
mmu04640	Hematopoietic cell lineage
mmu05200	Pathways in cancer
mmu04015	Rap1 signaling pathway
mmu04270	Vascular smooth muscle contraction
mmu05416	Viral myocarditis
mmu04658	Th1 and Th2 cell differentiation
mmu05410	Hypertrophic cardiomyopathy
mmu05414	Dilated cardiomyopathy
mmu04510	Focal adhesion
mmu05418	Fluid shear stress and atherosclerosis
mmu05310	Asthma
mmu04540	Gap junction
mmu04512	ECM-receptor interaction
mmu04611	Platelet activation
mmu05321	Inflammatory bowel disease
mmu04933	AGE-RAGE signaling pathway in diabetic complications
mmu04659	Th17 cell differentiation
mmu04924	Renin secretion
mmu04670	Leukocyte transendothelial migration
mmu04934	Cushing syndrome
mmu04151	PI3K-Akt signaling pathway
mmu04970	Salivary secretion
mmu05323	Rheumatoid arthritis
mmu05222	Small cell lung cancer
mmu04145	Phagosome
mmu04371	Apelin signaling pathway
mmu04014	Ras signaling pathway
