# Supplementary material for: Single-Cell Transcriptomic Profiles of Lung Pre-Metastatic Niche Reveal Neutrophil and Lymphatic Endothelial Cell Roles in Breast Cancer
Source: Cancers (Basel). 2022 Dec 28;15(1):176. doi: 10.3390/cancers15010176 (PMC9818165; doi:10.3390/cancers15010176)
Supplement: Supplementary file 1 [file cancers-15-00176-s001.zip › Table S22.xlsx]

## Sheet: M4_DAVID_PATHWA_KEGG
Category	Term	Count	%	PValue	-Log10(PValue)	Genes	List Total	Pop Hits	Pop Total	Fold Enrichment	Bonferroni	Benjamini	FDR
KEGG_PATHWAY	mmu05205:Proteoglycans in cancer	19	5.65476	1.29045e-08	7.88926	WNT2B, FZD2, LUM, MMP2, WNT5A, TWIST2, IGF2, ANK2, IGF1, HSPG2, DCN, COL1A1, COL1A2, MYC, GPC3, FLNB, ITGA5, FLNC, FGFR1	156	205	8977	5.33343	3.1358e-06	3.1358e-06	3.00676e-06
KEGG_PATHWAY	mmu04151:PI3K-Akt signaling pathway	21	6.25	3.3528e-06	5.47459	NTRK1, PDGFRB, NTRK2, ANGPT4, TNXB, LAMA2, CSF1, LAMB2, IGF2, VEGFC, IGF1, EFNA5, PGF, THBS3, COL1A1, COL1A2, MYC, ITGA11, ITGA5, FGFR1, CREB5	156	359	8977	3.36613	0.000814401	0.000337412	0.000323526
KEGG_PATHWAY	mmu04610:Complement and coagulation cascades	11	3.27381	4.16558e-06	5.38033	C3, C4B, C1RB, C1RA, C1S1, CFH, SERPING1, F3, CD55, CFB, C2	156	93	8977	6.80638	0.00101172	0.000337412	0.000323526
KEGG_PATHWAY	mmu04512:ECM-receptor interaction	10	2.97619	1.92953e-05	4.71455	COL1A1, TNXB, SV2C, COL1A2, LAMA2, LAMB2, ITGA11, ITGA5, HSPG2, THBS3	156	88	8977	6.53919	0.00467782	0.00117219	0.00112395
KEGG_PATHWAY	mmu04510:Focal adhesion	14	4.16667	4.22718e-05	4.37395	PDGFRB, TNXB, LAMA2, LAMB2, VEGFC, IGF1, PGF, THBS3, COL1A1, COL1A2, ITGA11, FLNB, ITGA5, FLNC	156	201	8977	4.0081	0.0102197	0.00204846	0.00196416
KEGG_PATHWAY	mmu05133:Pertussis	9	2.67857	5.05793e-05	4.29603	C3, C4B, C1RB, C1RA, C1S1, SERPING1, CALML4, ITGA5, C2	156	77	8977	6.72602	0.0122159	0.00204846	0.00196416
KEGG_PATHWAY	mmu04010:MAPK signaling pathway	16	4.7619	0.000163627	3.78615	NTRK1, PDGFRB, NTRK2, ANGPT4, CSF1, IL1R1, IGF2, VEGFC, PLA2G4A, IGF1, EFNA5, PGF, MYC, FLNB, FLNC, FGFR1	156	294	8977	3.13169	0.0389844	0.00552016	0.00529299
KEGG_PATHWAY	mmu04014:Ras signaling pathway	14	4.16667	0.000181734	3.74056	NTRK1, PDGFRB, NTRK2, ANGPT4, PLA2G2E, CSF1, IGF2, VEGFC, PLA2G4A, IGF1, CALML4, EFNA5, PGF, FGFR1	156	232	8977	3.47254	0.0432042	0.00552016	0.00529299
KEGG_PATHWAY	mmu05146:Amoebiasis	9	2.67857	0.000506482	3.29544	COL1A1, COL3A1, COL1A2, LAMA2, SERPINB6A, IL1R1, LAMB2, SERPINB6C, RAB7B	156	107	8977	4.84022	0.11583	0.013675	0.0131123
KEGG_PATHWAY	mmu04360:Axon guidance	10	2.97619	0.00407242	2.39015	EPHA4, ABLIM1, CXCL12, SEMA3D, WNT5A, CXCR4, EPHB2, EFNA5, NTN1, NFATC4	156	181	8977	3.17927	0.629025	0.0989599	0.0948875
KEGG_PATHWAY	mmu04640:Hematopoietic cell lineage	7	2.08333	0.00561977	2.25028	CSF1, IL1R1, ANPEP, CD9, ITGA5, CD34, CD55	156	94	8977	4.28526	0.745754	0.124146	0.119037
KEGG_PATHWAY	mmu05150:Staphylococcus aureus infection	8	2.38095	0.0066169	2.17935	C3, C4B, C1RB, C1RA, C1S1, CFH, CFB, C2	156	128	8977	3.59655	0.800761	0.124384	0.119265
KEGG_PATHWAY	mmu05230:Central carbon metabolism in cancer	6	1.78571	0.00665428	2.1769	NTRK1, PDGFRB, NTRK3, MYC, PFKP, FGFR1	156	69	8977	5.0039	0.802575	0.124384	0.119265
KEGG_PATHWAY	mmu04550:Signaling pathways regulating pluripotency of stem cells	8	2.38095	0.0106016	1.97463	FZD2, WNT2B, MYC, ID2, WNT5A, IGF1, SMAD5, FGFR1	156	140	8977	3.28828	0.924976	0.175891	0.168653
KEGG_PATHWAY	mmu04974:Protein digestion and absorption	7	2.08333	0.0108575	1.96427	COL1A1, COL15A1, COL3A1, COL1A2, COL5A1, COL14A1, FXYD2	156	108	8977	3.72976	0.929546	0.175891	0.168653
KEGG_PATHWAY	mmu04015:Rap1 signaling pathway	10	2.97619	0.0117602	1.92959	PDGFRB, APBB1IP, ANGPT4, CSF1, VEGFC, IGF1, CALML4, EFNA5, PGF, FGFR1	156	214	8977	2.68901	0.943565	0.178608	0.171257
KEGG_PATHWAY	mmu05165:Human papillomavirus infection	13	3.86905	0.0226603	1.64473	PDGFRB, WNT2B, FZD2, TNXB, LAMA2, LAMB2, WNT5A, THBS3, COL1A1, COL1A2, ITGA11, ITGA5, CREB5	156	362	8977	2.06653	0.996189	0.303882	0.291377
KEGG_PATHWAY	mmu04061:Viral protein interaction with cytokine and cytokine receptor	6	1.78571	0.0240643	1.61863	CCL8, CCL11, CXCL12, CSF1, ACKR3, CXCR4	156	95	8977	3.63441	0.997312	0.303882	0.291377
KEGG_PATHWAY	mmu04350:TGF-beta signaling pathway	6	1.78571	0.0240643	1.61863	FST, MYC, ID2, SMAD5, DCN, FBN1	156	95	8977	3.63441	0.997312	0.303882	0.291377
KEGG_PATHWAY	mmu05200:Pathways in cancer	17	5.05952	0.0250109	1.60187	NTRK1, PDGFRB, WNT2B, FZD2, LAMA2, LAMB2, MMP2, WNT5A, IGF2, VEGFC, CXCR4, IGF1, CALML4, PGF, CXCL12, MYC, FGFR1	156	543	8977	1.80159	0.997877	0.303882	0.291377
KEGG_PATHWAY	mmu04310:Wnt signaling pathway	8	2.38095	0.0269929	1.56875	SFRP4, SFRP1, FZD2, WNT2B, SERPINF1, MYC, WNT5A, NFATC4	156	169	8977	2.72402	0.998705	0.312347	0.299493
KEGG_PATHWAY	mmu04060:Cytokine-cytokine receptor interaction	11	3.27381	0.0297169	1.527	GDF10, CNTFR, IL33, CCL8, CCL11, CXCL12, CSF1, IL1R1, ACKR3, CXCR4, IL17RA	156	292	8977	2.16779	0.999345	0.320447	0.30726
KEGG_PATHWAY	mmu04933:AGE-RAGE signaling pathway in diabetic complications	6	1.78571	0.0303304	1.51812	COL1A1, COL3A1, COL1A2, MMP2, VEGFC, F3	156	101	8977	3.41851	0.999438	0.320447	0.30726
KEGG_PATHWAY	mmu04145:Phagosome	8	2.38095	0.0381239	1.4188	C3, C1RB, COLEC11, C1RA, TUBB2B, ITGA5, RAB7B, THBS3	156	182	8977	2.52944	0.999921	0.386005	0.37012
KEGG_PATHWAY	mmu04020:Calcium signaling pathway	9	2.67857	0.0560034	1.25179	NTRK1, PDGFRB, NTRK2, NTRK3, PDE1A, VEGFC, CXCR4, CALML4, FGFR1	156	240	8977	2.15793	0.999999	0.544353	0.521952
KEGG_PATHWAY	mmu04380:Osteoclast differentiation	6	1.78571	0.0704879	1.15189	CSF1, IL1R1, CTSK, FHL2, ACP5, SIRPA	156	128	8977	2.69742	1	0.627969	0.602127
KEGG_PATHWAY	mmu05410:Hypertrophic cardiomyopathy	5	1.4881	0.0722405	1.14122	LAMA2, TPM2, ITGA11, IGF1, ITGA5	156	91	8977	3.16181	1	0.627969	0.602127
KEGG_PATHWAY	mmu04926:Relaxin signaling pathway	6	1.78571	0.0723586	1.14051	COL1A1, COL3A1, COL1A2, MMP2, VEGFC, CREB5	156	129	8977	2.67651	1	0.627969	0.602127
KEGG_PATHWAY	mmu05414:Dilated cardiomyopathy	5	1.4881	0.0793025	1.10071	LAMA2, TPM2, ITGA11, IGF1, ITGA5	156	94	8977	3.0609	1	0.664501	0.637155

## Sheet: 工作表1
Term
mmu05205	Proteoglycans in cancer
mmu04151	PI3K-Akt signaling pathway
mmu04610	Complement and coagulation cascades
mmu04512	ECM-receptor interaction
mmu04510	Focal adhesion
mmu05133	Pertussis
mmu04010	MAPK signaling pathway
mmu04014	Ras signaling pathway
mmu05146	Amoebiasis
mmu04360	Axon guidance
mmu04640	Hematopoietic cell lineage
mmu05150	Staphylococcus aureus infection
mmu05230	Central carbon metabolism in cancer
mmu04550	Signaling pathways regulating pluripotency of stem cells
mmu04974	Protein digestion and absorption
mmu04015	Rap1 signaling pathway
mmu05165	Human papillomavirus infection
mmu04061	Viral protein interaction with cytokine and cytokine receptor
mmu04350	TGF-beta signaling pathway
mmu05200	Pathways in cancer
mmu04310	Wnt signaling pathway
mmu04060	Cytokine-cytokine receptor interaction
mmu04933	AGE-RAGE signaling pathway in diabetic complications
mmu04145	Phagosome
