# Supplementary material for: Single-Cell Transcriptomic Profiles of Lung Pre-Metastatic Niche Reveal Neutrophil and Lymphatic Endothelial Cell Roles in Breast Cancer
Source: Cancers (Basel). 2022 Dec 28;15(1):176. doi: 10.3390/cancers15010176 (PMC9818165; doi:10.3390/cancers15010176)
Supplement: Supplementary file 1 [file cancers-15-00176-s001.zip › Table S23.xlsx]

## Sheet: M5_KEGG_PATHWAY  
Category	Term	Count	%	PValue	-Log10(PValue)	Genes	List Total	Pop Hits	Pop Total	Fold Enrichment	Bonferroni	Benjamini	FDR
KEGG_PATHWAY	mmu04979:Cholesterol metabolism	5	2.11864	0.00141857	2.84815	SOAT2, APOC1, LIPG, ANGPTL4, LDLR	91	49	8977	10.0662	0.223287	0.252506	0.252506
KEGG_PATHWAY	mmu00561:Glycerolipid metabolism	5	2.11864	0.00338357	2.47062	GK, GPAM, LIPG, MGLL, DGKH	91	62	8977	7.95551	0.452995	0.301138	0.301138
KEGG_PATHWAY	mmu04010:MAPK signaling pathway	9	3.81356	0.0091251	2.03976	DUSP4, DUSP1, KITL, HGF, HSPB1, RAC3, DUSP6, HSPA1B, HSPA1A	91	294	8977	3.01985	0.804408	0.537377	0.537377
KEGG_PATHWAY	mmu03320:PPAR signaling pathway	5	2.11864	0.0120759	1.91808	FABP3, GK, ACSL1, ANGPTL4, ACOX3	91	89	8977	5.54204	0.884973	0.537377	0.537377
KEGG_PATHWAY	mmu04924:Renin secretion	4	1.69492	0.0405509	1.392	GUCY1A1, GUCY1B1, PRKG2, ADRB2	91	76	8977	5.19202	0.999369	1	1
KEGG_PATHWAY	mmu04970:Salivary secretion	4	1.69492	0.0534701	1.27189	GUCY1A1, GUCY1B1, PRKG2, ADRB2	91	85	8977	4.64228	0.999944	1	1
KEGG_PATHWAY	mmu04022:cGMP-PKG signaling pathway	5	2.11864	0.0955165	1.01992	GUCY1A1, RGS2, GUCY1B1, PRKG2, ADRB2	91	173	8977	2.85111	1	1	1

## Sheet: 工作表1
mmu04979	Cholesterol metabolism
mmu00561	Glycerolipid metabolism
mmu04010	MAPK signaling pathway
mmu03320	PPAR signaling pathway
mmu04924	Renin secretion
