# Supplementary material for: Single-Cell Transcriptomic Profiles of Lung Pre-Metastatic Niche Reveal Neutrophil and Lymphatic Endothelial Cell Roles in Breast Cancer
Source: Cancers (Basel). 2022 Dec 28;15(1):176. doi: 10.3390/cancers15010176 (PMC9818165; doi:10.3390/cancers15010176)
Supplement: Supplementary file 1 [file cancers-15-00176-s001.zip › Table S24.xlsx]

## Sheet: 工作表1
The cell-cell interactions only in lungs of MMTV-PyVT
Ligand		Receptor		pvalue	-log2pvale	FC(Log2)
Cell type	Gene	Cell type	Gene
Neutrophil	Ebi3	Alv Fibroblast	Il6st	6.26438e-09	27.2502	1.01369
Neutrophil	Lgals3	Alv Fibroblast	Itgb1	1.3672e-06	19.4803	1.12895
Neutrophil	Lgals3	Alv Fibroblast	Mertk	1.51911e-07	22.6503	1.12895
Neutrophil	Anxa1	Alv Macrophage	Fpr1	6.45231e-07	20.5637	2.68844
Neutrophil	Anxa1	Alv Macrophage	Fpr2	2.90353e-06	18.3938	2.68844
Neutrophil	Lgals3	Alv Macrophage	Itgb1	6.07645e-07	20.6503	1.12895
Neutrophil	Lgals3	Alv Macrophage	Mertk	6.07645e-07	20.6503	1.12895
Neutrophil	Lgals3	Capillary type I EC	Itga3	6.07645e-07	20.6503	1.12895
Neutrophil	Lgals3	Capillary type I EC	Itgb1	1.67102e-06	19.1908	1.12895
Neutrophil	Lgals3	Capillary type I EC	Mertk	1.51911e-07	22.6503	1.12895
Neutrophil	Cd177	Capillary type I EC	Pecam1	1.31552e-06	19.5359	1.56591
Neutrophil	Vasp	Classical monocyte	Itga4	3.50805e-07	21.4428	1.88545
Neutrophil	Lgals3	Classical monocyte	Itgb1	6.07645e-07	20.6503	1.12895
Neutrophil	Anxa1	Cxcr2+Ly6g-Granulocytes	Fpr2	6.45231e-07	20.5637	2.68844
Neutrophil	Ebi3	Lymphatic EC	Il6st	6.26438e-09	27.2502	1.01369
Neutrophil	Lgals3	Lymphatic EC	Itgb1	9.11466e-07	20.0653	1.12895
Neutrophil	Cd177	Lymphatic EC	Pecam1	3.13219e-07	21.6063	1.56591
Neutrophil	Anxa1	Neutrophil	Fpr1	2.58092e-06	18.5637	2.68844
Neutrophil	Anxa1	Neutrophil	Fpr2	4.6779e-06	17.7057	2.68844
Capillary type I EC	S100a6	Capillary type I EC	Ager	6.26438e-09	27.2502	1.64581
Classical monocyte	Slpi	Alv Fibroblast	Plscr4	2.50575e-08	25.2502	1.35878
Classical monocyte	Slpi	Capillary type I EC	Plscr4	2.50575e-08	25.2502	1.35878
Classical monocyte	Cfh	Classical monocyte	Itgam	5.0115e-08	24.2502	1.14774
Classical monocyte	Cfh	Classical monocyte	Sell	2.50575e-08	25.2502	1.14774
Classical monocyte	Cfh	Cxcr2+Ly6g-Granulocytes	Itgam	6.26438e-09	27.2502	1.14774
Classical monocyte	Cfh	Cxcr2+Ly6g-Granulocytes	Sell	1.87931e-08	25.6652	1.14774
Classical monocyte	Cfh	Neutrophil	Itgam	6.26438e-08	23.9283	1.14774
Classical monocyte	Cfh	Neutrophil	Sell	5.0115e-08	24.2502	1.14774
Lymphatic EC	Serpine2	Alv Macrophage	Plaur	2.50575e-08	25.2502	1.27976
Lymphatic EC	Serpine2	Capillary type I EC	Plaur	5.63794e-08	24.0803	1.27976
Lymphatic EC	Serpine2	Classical monocyte	Plaur	7.51726e-08	23.6652	1.27976
Lymphatic EC	Serpine2	Cxcr2+Ly6g-Granulocytes	Plaur	2.50575e-08	25.2502	1.27976
Lymphatic EC	Serpine2	Lymphatic EC	Plaur	6.26438e-09	27.2502	1.27976
Lymphatic EC	Serpine2	Neutrophil	Plaur	8.77013e-08	23.4428	1.27976
Lymphatic EC	S100a6	Capillary type I EC	Ager	5.63794e-08	24.0803	1.20149
Lymphatic EC	S100a6	Neutrophil	Anxa2	1.3531e-06	19.4953	1.20149
Alv Fibroblast	S100a6	Capillary type I EC	Ager	7.51726e-08	23.6652	1.04001
Alv Fibroblast	S100a6	Neutrophil	Anxa2	1.80414e-06	19.0803	1.04001
