# Supplementary material for: Single-Cell Transcriptomic Profiles of Lung Pre-Metastatic Niche Reveal Neutrophil and Lymphatic Endothelial Cell Roles in Breast Cancer
Source: Cancers (Basel). 2022 Dec 28;15(1):176. doi: 10.3390/cancers15010176 (PMC9818165; doi:10.3390/cancers15010176)
Supplement: Supplementary file 1 [file cancers-15-00176-s001.zip › Table S25.xlsx]

## Sheet: 工作表1
Up-regulated cell-cell interactions in lungs of MMTV-PyVT
Ligand		Receptor		pvalue	-log2pvale	FC(Log2)
Cell type	Gene	Cell type	Gene
Capillary type I EC	Col4a2	Alv Fibroblast	Itgb1	2.81897e-07	21.7583	2.26724
Capillary type I EC	Sema7a	Alv Fibroblast	Itgb1	2.25518e-07	22.0803	2.26724
Lymphatic EC	S100a6	Alv Macrophage	Anxa2	1.80414e-06	19.0803	1.20149
Lymphatic EC	S100a6	Capillary type I EC	Itgb1	6.20173e-07	20.6208	1.20149
Cxcr2+Ly6g-Granulocytes	Slpi	Capillary type I EC	Plscr4	6.26438e-09	27.2502	1.11788
Alv Fibroblast	S100a6	Alv Fibroblast	Itgb1	6.76553e-07	20.4953	1.04001
Alv Fibroblast	S100a6	Alv Macrophage	Anxa2	2.40552e-06	18.6652	1.04001
Alv Fibroblast	S100a6	Capillary type I EC	Itgb1	8.26898e-07	20.2058	1.04001
Alv Fibroblast	S100a6	Classical monocyte	Anxa2	1.20276e-06	19.6652	1.04001
Alv Fibroblast	S100a6	Lymphatic EC	Itgb1	4.51035e-07	21.0803	1.04001
