# Supplementary material for: Single-Cell Transcriptomic Profiles of Lung Pre-Metastatic Niche Reveal Neutrophil and Lymphatic Endothelial Cell Roles in Breast Cancer
Source: Cancers (Basel). 2022 Dec 28;15(1):176. doi: 10.3390/cancers15010176 (PMC9818165; doi:10.3390/cancers15010176)
Supplement: Supplementary file 1 [file cancers-15-00176-s001.zip › Table S26.xlsx]

## Sheet: 工作表1
Down-regulated cell-cell interactions in lungs of MMTV-PyVT
Ligand		Receptor		pvalue	-log2pvale	FC(Log2)
Cell type	Gene	Cell type	Gene
Cxcr2+Ly6g-Granulocytes	Ccl3	Alv Macrophage	Ccr1	6.26438e-09	27.2502	-1.90555
Cxcr2+Ly6g-Granulocytes	Ccl3	Capillary type I EC	Ackr2	2.50575e-08	25.2502	-1.90555
Cxcr2+Ly6g-Granulocytes	Ccl3	Classical monocyte	Ccr1	6.26438e-09	27.2502	-1.90555
Cxcr2+Ly6g-Granulocytes	Ccl3	Cxcr2+Ly6g-Granulocytes	Ccr1	6.89082e-08	23.7907	-1.90555
Cxcr2+Ly6g-Granulocytes	Tgm2	Alv Fibroblast	Sdc4	6.26438e-09	27.2502	-1.65541
Lymphatic EC	Icam1	Alv Macrophage	Itgal	2.50575e-08	25.2502	-1.29189
Lymphatic EC	Icam1	Alv Macrophage	Itgb2	3.13219e-08	24.9283	-1.29189
Lymphatic EC	Icam1	Capillary type I EC	Ahr	6.26438e-09	27.2502	-1.29189
Lymphatic EC	Icam1	Classical monocyte	Ahr	6.26438e-09	27.2502	-1.29189
Lymphatic EC	Icam1	Classical monocyte	Itgal	5.0115e-08	24.2502	-1.29189
Lymphatic EC	Icam1	Classical monocyte	Itgam	5.0115e-08	24.2502	-1.29189
Classical monocyte	Fgl2	Classical monocyte	Fcgr2b	6.26438e-09	27.2502	-1.01951
Cxcr2+Ly6g-Granulocytes	Ccl6	Cxcr2+Ly6g-Granulocytes	Ccr1	4.13449e-07	21.2058	-1.00909
