# Supplementary material for: Single-Cell Transcriptomic Profiles of Lung Pre-Metastatic Niche Reveal Neutrophil and Lymphatic Endothelial Cell Roles in Breast Cancer
Source: Cancers (Basel). 2022 Dec 28;15(1):176. doi: 10.3390/cancers15010176 (PMC9818165; doi:10.3390/cancers15010176)
Supplement: Supplementary file 1 [file cancers-15-00176-s001.zip › Table S27.xlsx]

## Sheet: 工作表1
Loss of cell-cell interactions in lungs of MMTV-PyVT
Ligand		Receptor		pvalue	-log2pvale	FC(Log2)
Cell type	Gene	Cell type	Gene
Capillary type I ECs	Lrg1	Alv fibroblastsblast	Acvrl1	5.20616e-07	20.8733	-1.74041
Capillary type I ECs	Lrg1	Capillary type I ECs	Acvrl1	1.66594e-05	15.8733	-1.74041
Capillary type I ECs	Lrg1	Lymphatic ECs	Acvrl1	5.20616e-07	20.8733	-1.74041
Lymphatic ECs	Icam1	Classical monocytes	Itgb2	3.6443e-06	18.0659	-1.29189
Lymphatic ECs	Icam1	Cxcr2+Ly6g-Granulocytes	Itgam	9.11078e-07	20.0659	-1.29189
Lymphatic ECs	Icam1	Lymphatic ECs	Itgav	9.11078e-07	20.0659	-1.29189
Lymphatic ECs	Fbn1	Lymphatic ECs	Itgav	3.90462e-07	21.2883	-1.06078
Cxcr2+Ly6g-Granulocytes	Tgm2	Capillary type I ECs	Sdc4	5.20616e-07	20.8733	-1.65541
Cxcr2+Ly6g-Granulocytes	Ccl6	Alv macrophages	Ccr1	6.24736e-06	17.2883	-1.00909
Cxcr2+Ly6g-Granulocytes	Ccl6	Classical monocytes	Ccr1	6.24736e-06	17.2883	-1.00909
